# Supplementary material
Source: PubMed Central journal article supplement (PMC8525236)
Supplement: advancesADV2020004174-suppl1.pdf [file advancesADV2020004174-suppl1.pdf]

## SUPPLEMENTAL MATERIALS

### Materials and methods

#### Specimens

Peripheral blood specimens were collected under protocols approved and overseen by the Stanford University Administrative Panel for the Protection of Human Subjects and the Stanford Cancer Institute Scientific Review Committee. The participant was counseled and gave consent for genomic sequencing studies. Peripheral blood specimens were drawn into EDTA or sodium heparin tubes for DNA-based studies, and a buffy coat was isolated. For the time point #1 specimen, granulocytes were isolated using Ficoll-Paque PREMIUM (GE Healthcare Biosciences, Pittsburgh, PA, USA) according to the manufacturer's protocol. Peripheral blood specimens were drawn into PAXgene Blood RNA tubes (PreAnalytiX GmbH, Hombrechtikon, Switzerland) for RNA-based studies. A skin punch biopsy was performed and cultured as described previously to provide the patient's germline DNA complement.<sup>1</sup> DNA was extracted using the Gentra Puregene Cell Kit (Qiagen, Valencia, CA, USA), and RNA was extracted using the PAXgene Blood RNA Kit (Qiagen), both according to the manufacturer's protocol.

#### Genome sequencing

Genome sequencing on the time point #1 sample was performed by MacroGen to achieve a mean coverage depth of 40X. Samples were prepared according to the Illumina TruSeq DNA sample preparation guide, and the libraries were sequenced using the Illumina HiSeq 2000 Sequencer. Reads were mapped by BWA against UCSC hg19. IGV was used to manually inspect the genomic coordinates corresponding to the 9p24 and 22q11.2 loci to identify discordant paired-end sequences that would suggest a genomic DNA rearrangement.

Genome sequencing on the time point #2 (pre-ruxolitinib specimen), time point #4 (blast transformation specimen), and skin samples was performed by MacroGen (ver. MGX-WGS-0101-M) to a mean depth of 40X. In brief, samples were prepared according to the Illumina TruSeq Nano sample preparation guide, and the libraries were sequenced using the Illumina HiSeq X Ten Sequencer to generate 150-bp paired-end reads. Reads were aligned to UCSC hg19 using BWA, and somatic SNVs in time points #2 and #4 were called by MuTect, following best practices, using the cultured skin fibroblasts as the germline comparison.<sup>2</sup> Potential coding variants that were present in time point #4 but not time point #2 were manually curated as discussed in the below paragraph.

Variants identified by the MuTect pipeline were manually inspected if they resulted in a non-synonymous coding change or involved the invariant 2 bases of the donor or acceptor splice site. Integrative Genomics Viewer was used to review the read sequence, base quality scores, and mapping scores across time point #2, time point #4, and skin specimens. The genomic context of the variants regions was further examined using UCSC Genome Browser (<http://genome.ucsc.edu/>). Features that were generally used to exclude potential variants for further consideration included: 1) 3 or less variant reads in time point #4, 2) variant reads present on only one strand, 3) involves a region of the genome with one or more highly homologous regions, 4) mutant reads observed in time points #2 and #4, and 5) common SNPs ( $\geq 1\%$  minor

allele frequency, map uniquely, no “clinically associated” flag). All variants that passed manual inspection were confirmed by Sanger sequencing.

### RNA sequencing

RNA sequencing was performed from RNA isolated from the time points #2 and #3. Samples were prepared using the Illumina TruSeq Stranded mRNA Library Prep Kit, following the manufacturer’s protocol. Two independent libraries were generated for each time point, and at least 25M reads were generated for each replicate (i.e., at least 50M reads for each time point). Samples were sequenced on the HiSeq 2000 with a 2x101bp configuration.

We used GRCh37 transcriptome reference as index and salmon v0.8.2<sup>3</sup> to quantify gene expression from fastq files at time points #2 and #3 using 8 cores. Differential expression between time points was performed using DESeq2 version 1.10.1<sup>4</sup>. We followed the DESeq2 pipeline to generate the results. In brief, we filtered out genes for which less than 10 counts were observed across samples. Data was then corrected for library size; dispersion was estimated and effects were tested after fitting a negative binomial GLM and obtaining Wald statistics. Results were provided at FDR of 1%. Differentially expressed genes at time point #3 versus time point #2 are provided in **Supplemental Table S2** for all genes with a p.adjusted <0.01.

### Mate pair sequencing (MPseq)

MPseq library preparation methods have been previously described<sup>5-7</sup>. Briefly, DNA was processed using the Illumina Nextera Mate Pair library preparation kit (Illumina) and sequenced on the Illumina HiSeq 2500 in rapid run mode. Pooled libraries were hybridized onto a flow cell (2 samples per lane) and sequenced using 101-basepair reads and paired end sequencing. Sequencing data was mapped to the reference genome (GRCh38) using BIMA<sup>8</sup> and the output analyzed using SVAtools in order to detect structural variants (SVs) and large genomic alterations (>30Kb) that involve breakpoint junctions and/or copy number alterations (CNAs). The breakpoint locations of both junctions and CNAs are reported<sup>5-7</sup> and graphically illustrated using genome, junction and region plots as previously described<sup>9</sup>.

### Chromosomal Microarray

Whole genome chromosome microarray (CMA) was performed on the CytoScanHD microarray platform (ThermoFisher Scientific, Waltham, MA). DNA is processed through enzymatic digestion, adapter ligation, PCR, magnetic bead purification of PCR products, fragmentation into 25-100bp DNA segments, and biotinylation. Biotinylated DNA hybridizes onto a CytoScanHD array, washed and stained in a GeneChip® Fluidics Station 450, and scanned in a GeneChip® scanner using the CytoScanHD\_Array\_450 protocol. The resulting data were analyzed using Chromosome Analysis Suite (ChAS) version 3.3.

## Supplemental Figures

**Figure S1. FISH analysis.** Sequential metaphase FISH was performed on a previously G-banded metaphase (left panel). FISH was performed using the dual-fusion BCR/ABL1 probe (Abbott; ABL probe = red, BCR probe = green) to examine the *BCR* locus (right panel). Consistent with this representative image, all five metaphases examined by sequential FISH demonstrated that the green BCR signal was only observed on the short arm of the derivative chromosome 9 at approximately 9p24 (solid arrow). The BCR signal was not observed on the derivative 22 (hollow arrow). These findings are consistent with the entire *BCR* locus being present on the derivative 9. This finding suggested that either: (1) The *BCR* locus is not involved in the t(9;22)(p24;q11.2) observed in this case. Rather, another region on 22q11.2, or nearby, is involved, or (2) This represents a more complex structural rearrangement. Subsequent studies demonstrated that the latter had occurred in this case.

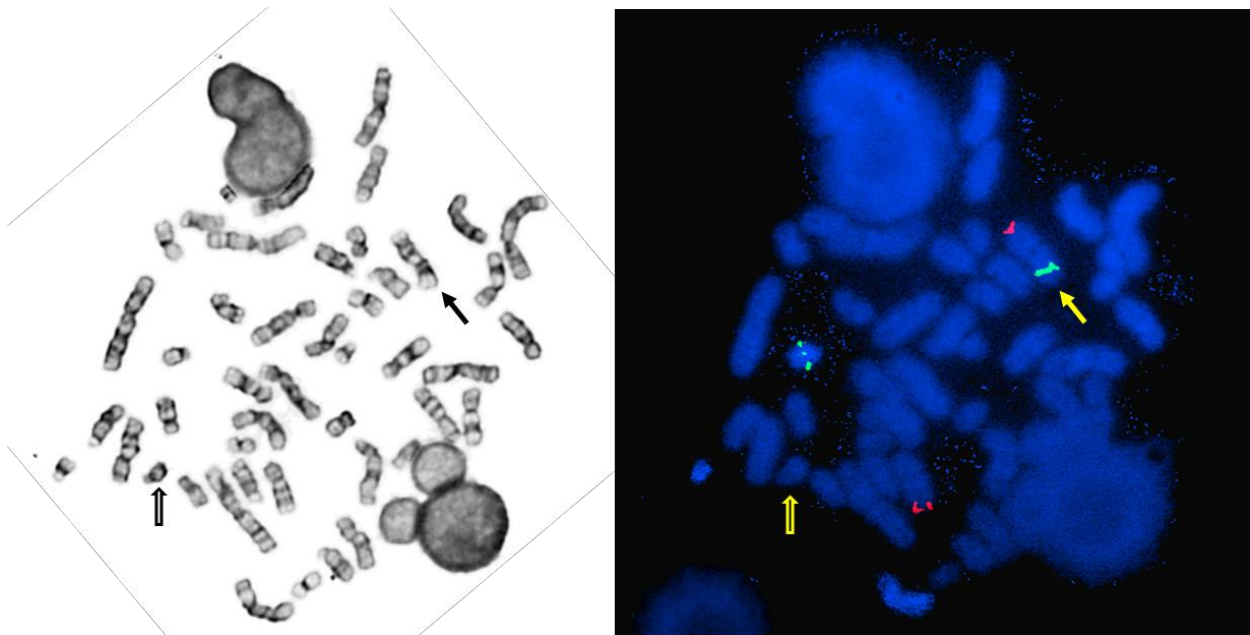

**Figure S2. Observed RNA fusions.** Reverse transcription PCR (RT-PCR) demonstrated an in-frame fusion between exon 1 of *BCR* (NM\_004327.4) and exon 19 of *JAK2* (NM\_004972.3). RT-PCR also identified a fusion between exon 16 of *JAK2* and exon 2 of *PPM1F* (NM\_014634.4); however, this results in the introduction of a stop codon at the first complete *PPM1F* codon. A *PRAMENP/BCR* fusion transcript was not detected.

## *BCR/JAK2*

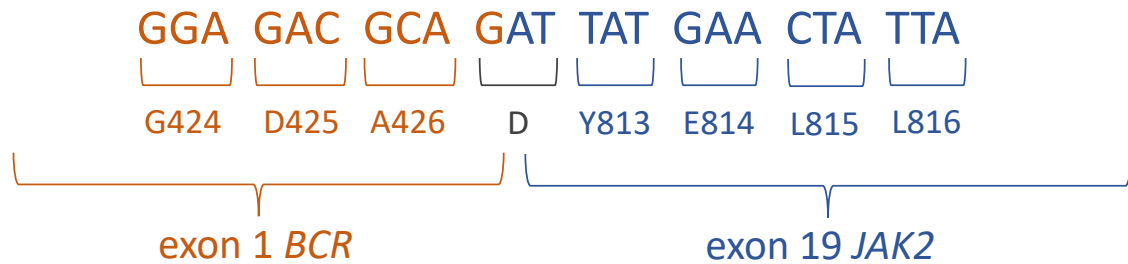

---

## *JAK2/PPM1F*

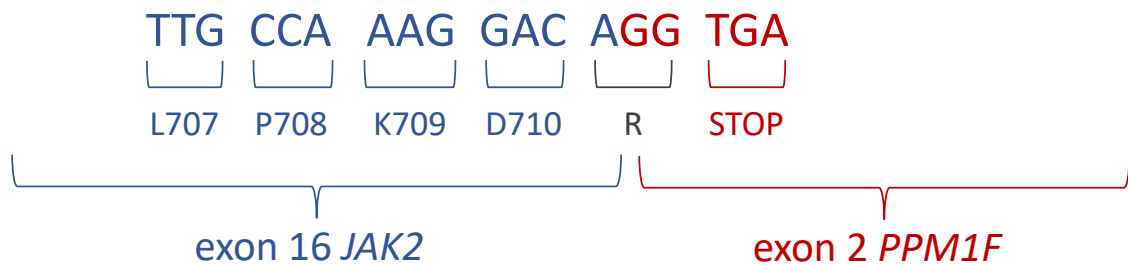

**Figure S3.** Peripheral blood and bone marrow histology and immunohistochemistry prior to ruxolitinib (A-D) and at blast transformation (E-I). Hydroxyurea had been discontinued two and a half weeks prior to pre-ruxolitinib sample collection (A-D). **A)** Peripheral blood showed a marked leukocytosis with myeloid predominance and left-shift but no increase in blasts. **B)** Bone marrow aspirate and **C)** core biopsy showed a hypercellular (80%) marrow with mild myeloid hyperplasia (M:E = 4:1), left-shift, but no increase in blasts (blasts = 0%). Micromegakaryocytes were seen with occasional multinucleation. **D)** A reticulin stain demonstrated minimal patchy fibrosis, but no collagen fibrosis was noted. **E)** At blast transformation, the bone marrow core biopsy showed patchy (0-70%, average 40%) cellularity with clusters of blasts. Immunohistochemistry demonstrated that blasts were positive for **F)** CD34, **G)** CD10, and **H)** CD79a. **I)** Immunohistochemistry demonstrated that blasts were negative for MPO. Peripheral blood image (A) was taken at 60X; bone marrow aspirate and biopsy images (B-I) were taken at 40X.

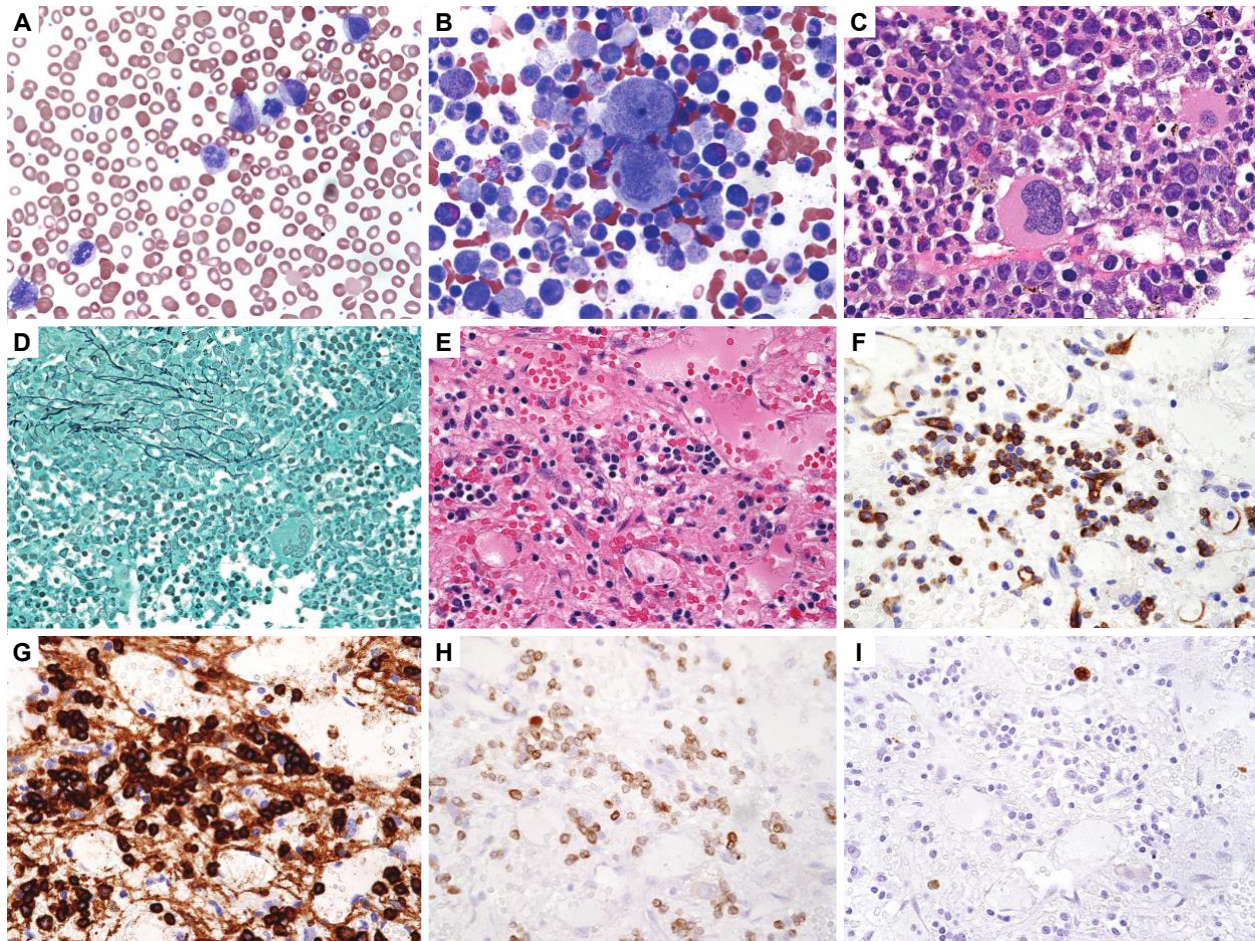

## Supplemental Tables

**Table S1.** Genomic DNA (gDNA) and RNA fusion breakpoints. The *BCR/JAK2*, *JAK2/PPM1F*, *PRAMENP/BCR* gDNA breakpoints were identified by genome sequencing and then confirmed by Sanger sequencing. RNA fusion breakpoints were confirmed by RT-PCR.

| Gene fusion        | Genomic DNA breakpoint 1   | Genomic DNA breakpoint 2   | RNA fusion breakpoint 1     | RNA fusion breakpoint 2    |
|--------------------|----------------------------|----------------------------|-----------------------------|----------------------------|
| <i>BCR/JAK2</i>    | GGAACACAATTTAGCCCCTAAACT/  | /AGTTTGTGGTTCTTTAATTATAGAA | GAGGGGCGCCTTCCATGGAGACGCAG/ | /ATTATGAACTATTAACAGAAAATGA |
| <i>JAK2/PPM1F</i>  | GATTATTCAAATGATTTGAACTTTA/ | /CAGGGAGCTTACAGTCTATCAAGAA | AGTATTACAGTTTTGCCAAAGGACA/  | /GGTGAAGCCTGGAGACCCTCTTGCC |
| <i>PRAMENP/BCR</i> | AGGAAATTATCCTCACAGGTCTGTC/ | /AGTAGCATTTTAGAGCTAGAGGGTC | Not detected                | Not detected               |

**Table S2.** Differentially expressed genes in blast transformation specimen (time point #3) versus pre-ruxolitinib specimen (time point #2). This table includes the DESeq2 output for all genes with a p.adjusted <0.01. The DESeq2 output estimate (column D) indicates the log<sub>2</sub> fold-change estimates.

| gene | baseMean        | estimate    | stderror     | p.adjusted  | symbol | description |                                                                                                                         |
|------|-----------------|-------------|--------------|-------------|--------|-------------|-------------------------------------------------------------------------------------------------------------------------|
| 1    | ENSG00000002586 | 3043.967424 | 3.398926731  | 0.079322822 | 0      | CD99        | CD99 molecule [Source:HGNC Symbol;Acc:7082]                                                                             |
| 2    | ENSG00000005381 | 17025.21042 | -2.849896093 | 0.05298942  | 0      | MPO         | myeloperoxidase [Source:HGNC Symbol;Acc:7218]                                                                           |
| 3    | ENSG00000008438 | 12741.16425 | -2.451132988 | 0.064895428 | 0      | PGLYRP1     | peptidoglycan recognition protein 1 [Source:HGNC Symbol;Acc:8904]                                                       |
| 4    | ENSG00000012223 | 170974.5002 | -2.449770214 | 0.037217047 | 0      | LTF         | lactotransferrin [Source:HGNC Symbol;Acc:6720]                                                                          |
| 5    | ENSG00000019582 | 23853.31529 | 2.149609944  | 0.051810437 | 0      | CD74        | CD74 molecule, major histocompatibility complex, class II invariant chain [Source:HGNC Symbol;Acc:1697]                 |
| 6    | ENSG00000059804 | 14072.30556 | -1.897867214 | 0.045287884 | 0      | SLC2A3      | solute carrier family 2 (facilitated glucose transporter), member 3 [Source:HGNC Symbol;Acc:11007]                      |
| 7    | ENSG00000079385 | 12514.06212 | -2.406116019 | 0.053108049 | 0      | CEACAM1     | carcinoembryonic antigen-related cell adhesion molecule 1 (biliary glycoprotein) [Source:HGNC Symbol;Acc:1814]          |
| 8    | ENSG00000096006 | 13032.25861 | -2.339161188 | 0.050365639 | 0      | CRISP3      | cysteine-rich secretory protein 3 [Source:HGNC Symbol;Acc:16904]                                                        |
| 9    | ENSG00000100448 | 5037.693028 | -3.560662274 | 0.064752225 | 0      | CTSG        | cathepsin G [Source:HGNC Symbol;Acc:2532]                                                                               |
| 10   | ENSG00000100504 | 18527.48567 | -1.905157273 | 0.0505606   | 0      | PYGL        | phosphorylase, glycogen, liver [Source:HGNC Symbol;Acc:9725]                                                            |
| 11   | ENSG00000101425 | 22644.55065 | -2.599996418 | 0.045755181 | 0      | BPI         | bactericidal/permeability-increasing protein [Source:HGNC Symbol;Acc:1095]                                              |
| 12   | ENSG00000105205 | 6962.801098 | -2.929570074 | 0.058127945 | 0      | CLC         | Charcot-Leyden crystal galectin [Source:HGNC Symbol;Acc:2014]                                                           |
| 13   | ENSG00000107447 | 3041.260508 | 4.574473457  | 0.090238452 | 0      | DNTT        | DNA nucleotidylexotransferase [Source:HGNC Symbol;Acc:2983]                                                             |
| 14   | ENSG00000112096 | 29170.08726 | 2.13141771   | 0.042108456 | 0      | SOD2        | superoxide dismutase 2, mitochondrial [Source:HGNC Symbol;Acc:11180]                                                    |
| 15   | ENSG00000115523 | 8254.0469   | 4.104207267  | 0.063876767 | 0      | GNLY        | granulysin [Source:HGNC Symbol;Acc:4414]                                                                                |
| 16   | ENSG00000117289 | 9594.184599 | 3.204112312  | 0.066129212 | 0      | TXNIP       | thioredoxin interacting protein [Source:HGNC Symbol;Acc:16952]                                                          |
| 17   | ENSG00000118113 | 15684.75416 | -3.250406702 | 0.054287505 | 0      | MMP8        | matrix metalloproteinase 8 (neutrophil collagenase) [Source:HGNC Symbol;Acc:7175]                                       |
| 18   | ENSG00000121316 | 10173.27372 | -2.330769767 | 0.05581644  | 0      | PLBD1       | phospholipase B domain containing 1 [Source:HGNC Symbol;Acc:26215]                                                      |
| 19   | ENSG00000124942 | 23239.37428 | 2.801518184  | 0.048893882 | 0      | AHNAK       | AHNAK nucleoprotein [Source:HGNC Symbol;Acc:347]                                                                        |
| 20   | ENSG00000132465 | 4271.786449 | 4.285281331  | 0.076529523 | 0      | IGJ         | immunoglobulin J polypeptide, linker protein for immunoglobulin alpha and mu polypeptides [Source:HGNC Symbol;Acc:5713] |
| 21   | ENSG00000133561 | 2412.362894 | 4.091901931  | 0.097816923 | 0      | GIMAP6      | GTPase, IMAP family member 6 [Source:HGNC Symbol;Acc:21918]                                                             |
| 22   | ENSG00000136026 | 8459.422856 | -2.146745229 | 0.053965196 | 0      | CKAP4       | cytoskeleton-associated protein 4 [Source:HGNC Symbol;Acc:16991]                                                        |

|    |                 |             |              |             |           |          |                                                                                                                                  |
|----|-----------------|-------------|--------------|-------------|-----------|----------|----------------------------------------------------------------------------------------------------------------------------------|
| 23 | ENSG00000138772 | 10212.05432 | -2.368364637 | 0.056536741 | 0         | ANXA3    | annexin A3 [Source:HGNC Symbol;Acc:541]                                                                                          |
| 24 | ENSG00000143546 | 353452.0374 | -2.10177758  | 0.038909048 | 0         | S100A8   | S100 calcium binding protein A8 [Source:HGNC Symbol;Acc:10498]                                                                   |
| 25 | ENSG00000148346 | 32091.60957 | -2.000209416 | 0.045288609 | 0         | LCN2     | lipocalin 2 [Source:HGNC Symbol;Acc:6526]                                                                                        |
| 26 | ENSG00000157514 | 20375.42658 | 2.989135362  | 0.048034717 | 0         | TSC2D3   | TSC22 domain family, member 3 [Source:HGNC Symbol;Acc:3051]                                                                      |
| 27 | ENSG00000158710 | 19870.4002  | 1.99785625   | 0.04686115  | 0         | TAGLN2   | transgelin 2 [Source:HGNC Symbol;Acc:11554]                                                                                      |
| 28 | ENSG00000159339 | 33570.11204 | -2.153992641 | 0.042816866 | 0         | PADI4    | peptidyl arginine deiminase, type IV [Source:HGNC Symbol;Acc:18368]                                                              |
| 29 | ENSG00000162654 | 2311.22736  | 3.405801902  | 0.090189196 | 0         | GBP4     | guanylate binding protein 4 [Source:HGNC Symbol;Acc:20480]                                                                       |
| 30 | ENSG00000163221 | 50518.96987 | -3.086568692 | 0.047227212 | 0         | S100A12  | S100 calcium binding protein A12 [Source:HGNC Symbol;Acc:10489]                                                                  |
| 31 | ENSG00000163993 | 3689.206058 | -2.61061988  | 0.068458596 | 0         | S100P    | S100 calcium binding protein P [Source:HGNC Symbol;Acc:10504]                                                                    |
| 32 | ENSG00000165168 | 16300.64388 | -2.17202299  | 0.057447339 | 0         | CYBB     | cytochrome b-245, beta polypeptide [Source:HGNC Symbol;Acc:2578]                                                                 |
| 33 | ENSG00000168685 | 6529.561414 | 3.086752063  | 0.070730597 | 0         | IL7R     | interleukin 7 receptor [Source:HGNC Symbol;Acc:6024]                                                                             |
| 34 | ENSG00000169442 | 4046.857949 | 2.963054345  | 0.069435454 | 0         | CD52     | CD52 molecule [Source:HGNC Symbol;Acc:1804]                                                                                      |
| 35 | ENSG00000169896 | 24001.93142 | -2.117320963 | 0.048035735 | 0         | ITGAM    | integrin, alpha M (complement component 3 receptor 3 subunit) [Source:HGNC Symbol;Acc:6149]                                      |
| 36 | ENSG00000170571 | 21793.10095 | -2.148034862 | 0.051116014 | 0         | EMB      | embigin [Source:HGNC Symbol;Acc:30465]                                                                                           |
| 37 | ENSG00000173334 | 6721.13838  | -3.481349587 | 0.063783192 | 0         | TRIB1    | tribbles pseudokinase 1 [Source:HGNC Symbol;Acc:16891]                                                                           |
| 38 | ENSG00000180644 | 3657.398829 | 4.282942422  | 0.094826207 | 0         | PRF1     | perforin 1 (pore forming protein) [Source:HGNC Symbol;Acc:9360]                                                                  |
| 39 | ENSG00000229295 | 3178.766804 | 3.108365863  | 0.075344187 | 0         | HLA-DPB1 | major histocompatibility complex, class II, DP beta 1 [Source:HGNC Symbol;Acc:4940]                                              |
| 40 | ENSG00000239839 | 97534.47237 | -1.58583423  | 0.037749599 | 0         | DEFA3    | defensin, alpha 3, neutrophil-specific [Source:HGNC Symbol;Acc:2762]                                                             |
| 41 | ENSG00000244734 | 158683.7472 | 2.984684521  | 0.039163382 | 0         | HBB      | hemoglobin, beta [Source:HGNC Symbol;Acc:4827]                                                                                   |
| 42 | ENSG00000257017 | 7638.794871 | -2.31578068  | 0.055086594 | 0         | HP       | haptoglobin [Source:HGNC Symbol;Acc:5141]                                                                                        |
| 43 | ENSG00000265972 | 47527.49184 | 2.804160803  | 0.049289636 | 0         | TXNIP    | cDNA FLJ61424, highly similar to Homo sapiens thioredoxin interacting protein (TXNIP), mRNA [Source:UniProtKB/TrEMBL;Acc:B4DVM7] |
| 44 | ENSG00000268765 | 16300.26692 | -2.172042265 | 0.05742986  | 0         | CYBB     | cytochrome b-245, beta polypeptide [Source:HGNC Symbol;Acc:2578]                                                                 |
| 45 | ENSG00000142657 | 17500.47227 | -1.627379333 | 0.043561484 | 7.76E-303 | PGD      | phosphogluconate dehydrogenase [Source:HGNC Symbol;Acc:8891]                                                                     |
| 46 | ENSG00000204936 | 1612.879916 | -3.79358762  | 0.101595198 | 1.49E-302 | CD177    | CD177 molecule [Source:HGNC Symbol;Acc:30072]                                                                                    |
| 47 | ENSG00000118520 | 4679.545263 | -2.258255174 | 0.060574469 | 1.35E-301 | ARG1     | arginase 1 [Source:HGNC Symbol;Acc:663]                                                                                          |
| 48 | ENSG00000168329 | 2501.405111 | 3.481908171  | 0.093435695 | 2.34E-301 | CX3CR1   | chemokine (C-X3-C motif) receptor 1 [Source:HGNC Symbol;Acc:2558]                                                                |
| 49 | ENSG00000100985 | 24707.48163 | -2.812170916 | 0.075502341 | 4.67E-301 | MMP9     | matrix metalloproteinase 9 (gelatinase B, 92kDa gelatinase, 92kDa type IV collagenase) [Source:HGNC Symbol;Acc:7176]             |
| 50 | ENSG00000271503 | 2488.183426 | 3.196292365  | 0.086160821 | 1.18E-298 | CCL5     | chemokine (C-C motif) ligand 5 [Source:HGNC Symbol;Acc:10632]                                                                    |



|    |                 |             |              |             |           |          |                                                                                                         |
|----|-----------------|-------------|--------------|-------------|-----------|----------|---------------------------------------------------------------------------------------------------------|
| 51 | ENSG00000161570 | 2488.224271 | 3.194229473  | 0.086169153 | 3.16E-298 | CCL5     | chemokine (C-C motif) ligand 5 [Source:HGNC Symbol;Acc:10632]                                           |
| 52 | ENSG00000107742 | 3654.93659  | 3.062599184  | 0.082618259 | 3.16E-298 | SPOCK2   | sparc/osteonectin, cwcv and kazal-like domains proteoglycan (testican) 2 [Source:HGNC Symbol;Acc:13564] |
| 53 | ENSG00000124490 | 2198.569818 | -3.140808323 | 0.084975988 | 1.70E-296 | CRISP2   | cysteine-rich secretory protein 2 [Source:HGNC Symbol;Acc:12024]                                        |
| 54 | ENSG00000164047 | 25083.72407 | -1.658135995 | 0.044863488 | 1.77E-296 | CAMP     | cathelicidin antimicrobial peptide [Source:HGNC Symbol;Acc:1472]                                        |
| 55 | ENSG00000198851 | 3385.700806 | 2.788376414  | 0.075595177 | 2.67E-295 | CD3E     | CD3e molecule, epsilon (CD3-TCR complex) [Source:HGNC Symbol;Acc:1674]                                  |
| 56 | ENSG00000186529 | 22846.77155 | -1.696411387 | 0.046224444 | 2.49E-292 | CYP4F3   | cytochrome P450, family 4, subfamily F, polypeptide 3 [Source:HGNC Symbol;Acc:2646]                     |
| 57 | ENSG00000229164 | 3210.524449 | 2.936678145  | 0.08068849  | 1.66E-287 | TRAC     | T cell receptor alpha constant [Source:HGNC Symbol;Acc:12029]                                           |
| 58 | ENSG00000154451 | 4514.857419 | 2.617267596  | 0.072034267 | 1.54E-286 | GBP5     | guanylate binding protein 5 [Source:HGNC Symbol;Acc:19895]                                              |
| 59 | ENSG00000174059 | 1318.660594 | 4.595798131  | 0.126968544 | 2.20E-284 | CD34     | CD34 molecule [Source:HGNC Symbol;Acc:1662]                                                             |
| 60 | ENSG00000100450 | 1931.230257 | 3.804941563  | 0.105415252 | 8.54E-283 | GZMH     | granzyme H (cathepsin G-like 2, protein h-CCPX) [Source:HGNC Symbol;Acc:4710]                           |
| 61 | ENSG00000196405 | 4865.889688 | 2.290570733  | 0.064010121 | 5.90E-278 | EVL      | Enah/Vasp-like [Source:HGNC Symbol;Acc:20234]                                                           |
| 62 | ENSG00000213809 | 2820.14037  | 2.98332435   | 0.083458775 | 2.30E-277 | KLRK1    | killer cell lectin-like receptor subfamily K, member 1 [Source:HGNC Symbol;Acc:18788]                   |
| 63 | ENSG00000103569 | 7509.708039 | 2.238579379  | 0.062631018 | 2.58E-277 | AQP9     | aquaporin 9 [Source:HGNC Symbol;Acc:643]                                                                |
| 64 | ENSG00000188042 | 2573.32487  | 3.154777588  | 0.088360962 | 1.03E-276 | ARL4C    | ADP-ribosylation factor-like 4C [Source:HGNC Symbol;Acc:698]                                            |
| 65 | ENSG00000196329 | 2259.239571 | 4.050170307  | 0.113931991 | 2.48E-274 | GIMAP5   | GTPase, IMAP family member 5 [Source:HGNC Symbol;Acc:18005]                                             |
| 66 | ENSG00000228163 | 2293.107198 | 2.961722026  | 0.083466653 | 2.47E-273 | HLA-DPA1 | major histocompatibility complex, class II, DP alpha 1 [Source:HGNC Symbol;Acc:4938]                    |
| 67 | ENSG00000206291 | 2292.315065 | 2.961058084  | 0.083480397 | 3.97E-273 | HLA-DPA1 | major histocompatibility complex, class II, DP alpha 1 [Source:HGNC Symbol;Acc:4938]                    |
| 68 | ENSG00000124469 | 12412.98263 | -1.798336078 | 0.050788439 | 3.49E-272 | CEACAM8  | carcinoembryonic antigen-related cell adhesion molecule 8 [Source:HGNC Symbol;Acc:1820]                 |
| 69 | ENSG00000081059 | 2722.000577 | 2.947237791  | 0.083694576 | 3.29E-269 | TCF7     | transcription factor 7 (T-cell specific, HMG-box) [Source:HGNC Symbol;Acc:11639]                        |
| 70 | ENSG00000010810 | 2756.774756 | 2.863893117  | 0.081708911 | 1.04E-266 | FYN      | FYN oncogene related to SRC, FGR, YES [Source:HGNC Symbol;Acc:4037]                                     |
| 71 | ENSG00000183019 | 3406.061701 | -2.608063233 | 0.074906887 | 3.50E-263 | C19orf59 | chromosome 19 open reading frame 59 [Source:HGNC Symbol;Acc:27291]                                      |
| 72 | ENSG00000162645 | 5681.138416 | 2.213336392  | 0.063699983 | 4.10E-262 | GBP2     | guanylate binding protein 2, interferon-inducible [Source:HGNC Symbol;Acc:4183]                         |
| 73 | ENSG00000092529 | 6379.060866 | -1.943094448 | 0.056273779 | 7.47E-259 | CAPN3    | calpain 3, (p94) [Source:HGNC Symbol;Acc:1480]                                                          |
| 74 | ENSG00000152229 | 4554.3252   | -2.231108792 | 0.064635643 | 1.08E-258 | PSTPIP2  | proline-serine-threonine phosphatase interacting protein 2 [Source:HGNC Symbol;Acc:9581]                |
| 75 | ENSG00000198821 | 2096.735274 | 3.282489928  | 0.096444181 | 1.68E-251 | CD247    | CD247 molecule [Source:HGNC Symbol;Acc:1677]                                                            |
| 76 | ENSG00000180871 | 15643.22069 | 1.784507411  | 0.052502145 | 7.91E-251 | CXCR2    | chemokine (C-X-C motif) receptor 2 [Source:HGNC Symbol;Acc:6027]                                        |
| 77 | ENSG00000169429 | 11442.58958 | -1.857324809 | 0.054798404 | 2.00E-249 | IL8      | interleukin 8 [Source:HGNC Symbol;Acc:6025]                                                             |
| 78 | ENSG00000164104 | 14323.52285 | -1.765845034 | 0.052349864 | 4.77E-247 | HMGB2    | high mobility group box 2 [Source:HGNC Symbol;Acc:5000]                                                 |

|     |                 |             |              |             |           |           |                                                                                               |
|-----|-----------------|-------------|--------------|-------------|-----------|-----------|-----------------------------------------------------------------------------------------------|
| 79  | ENSG00000185215 | 16358.87505 | 1.765726938  | 0.05296458  | 2.59E-241 | TNFAIP2   | tumor necrosis factor, alpha-induced protein 2 [Source:HGNC Symbol;Acc:11895]                 |
| 80  | ENSG00000242550 | 3423.001401 | -2.668651965 | 0.080088152 | 4.42E-241 | SERPINB10 | serpin peptidase inhibitor, clade B (ovalbumin), member 10 [Source:HGNC Symbol;Acc:8942]      |
| 81  | ENSG00000196415 | 1786.930375 | -3.951852701 | 0.118744238 | 1.72E-240 | PRTN3     | proteinase 3 [Source:HGNC Symbol;Acc:9495]                                                    |
| 82  | ENSG00000257473 | 1227.139531 | 4.103254992  | 0.124466982 | 5.58E-236 | DQ-A1     | MHC class II antigen [Source:UniProtKB/TrEMBL;Acc:Q5Y7D2]                                     |
| 83  | ENSG00000262134 | 2350.876664 | 3.095164577  | 0.093896323 | 6.08E-236 | TRBC1     | T cell receptor beta constant 1 [Source:HGNC Symbol;Acc:12156]                                |
| 84  | ENSG00000105639 | 3250.326857 | 2.380187701  | 0.072399322 | 1.09E-234 | JAK3      | Janus kinase 3 [Source:HGNC Symbol;Acc:6193]                                                  |
| 85  | ENSG00000179144 | 1877.171952 | 3.43188949   | 0.104712518 | 3.00E-233 | GIMAP7    | GTPase, IMAP family member 7 [Source:HGNC Symbol;Acc:22404]                                   |
| 86  | ENSG00000163220 | 266637.797  | -1.873724355 | 0.057360412 | 1.04E-231 | S100A9    | S100 calcium binding protein A9 [Source:HGNC Symbol;Acc:10499]                                |
| 87  | ENSG00000184702 | 2232.417075 | -2.613514426 | 0.080144463 | 6.36E-231 | SEPT1     | septin 5 [Source:HGNC Symbol;Acc:9164]                                                        |
| 88  | ENSG00000118515 | 5180.852199 | 2.086891029  | 0.064078176 | 2.49E-230 | SGK1      | serum/glucocorticoid regulated kinase 1 [Source:HGNC Symbol;Acc:10810]                        |
| 89  | ENSG00000261321 | 8321.981301 | -1.700935215 | 0.052702858 | 3.40E-226 | FAM101B   | family with sequence similarity 101, member B [Source:HGNC Symbol;Acc:28705]                  |
| 90  | ENSG00000183688 | 8321.776218 | -1.70087235  | 0.052701945 | 3.43E-226 | FAM101B   | family with sequence similarity 101, member B [Source:HGNC Symbol;Acc:28705]                  |
| 91  | ENSG00000234794 | 1933.825471 | 2.916740543  | 0.09061166  | 5.10E-225 | HLA-DRA   | major histocompatibility complex, class II, DR alpha [Source:HGNC Symbol;Acc:4947]            |
| 92  | ENSG00000230726 | 1933.693687 | 2.916599309  | 0.090617545 | 5.67E-225 | HLA-DRA   | major histocompatibility complex, class II, DR alpha [Source:HGNC Symbol;Acc:4947]            |
| 93  | ENSG00000206308 | 1933.504382 | 2.916406418  | 0.090613648 | 5.75E-225 | HLA-DRA   | major histocompatibility complex, class II, DR alpha [Source:HGNC Symbol;Acc:4947]            |
| 94  | ENSG00000127507 | 3615.069339 | 2.440172827  | 0.075999708 | 6.86E-224 | EMR2      | egf-like module containing, mucin-like, hormone receptor-like 2 [Source:HGNC Symbol;Acc:3337] |
| 95  | ENSG00000272398 | 14233.28432 | -1.621792217 | 0.050768737 | 1.26E-221 | CD24      | CD24 molecule [Source:HGNC Symbol;Acc:1645]                                                   |
| 96  | ENSG00000225697 | 3000.24758  | -2.307344301 | 0.072785648 | 2.98E-218 | SLC26A6   | solute carrier family 26 (anion exchanger), member 6 [Source:HGNC Symbol;Acc:14472]           |
| 97  | ENSG00000137441 | 1326.214345 | 4.064829084  | 0.128556776 | 3.91E-217 | FGFBP2    | fibroblast growth factor binding protein 2 [Source:HGNC Symbol;Acc:29451]                     |
| 98  | ENSG00000133742 | 1274.833188 | -4.060994202 | 0.128583518 | 1.22E-216 | CA1       | carbonic anhydrase I [Source:HGNC Symbol;Acc:1368]                                            |
| 99  | ENSG00000160883 | 13678.19391 | -2.060409856 | 0.065278991 | 2.24E-216 | HK3       | hexokinase 3 (white cell) [Source:HGNC Symbol;Acc:4925]                                       |
| 100 | ENSG00000153563 | 1966.196514 | 2.891631577  | 0.091738028 | 8.51E-216 | CD8A      | CD8a molecule [Source:HGNC Symbol;Acc:1706]                                                   |
| 101 | ENSG00000166750 | 2359.217174 | 2.842624742  | 0.090245871 | 1.68E-215 | SLFN5     | schlafen family member 5 [Source:HGNC Symbol;Acc:28286]                                       |
| 102 | ENSG00000198502 | 1959.897871 | 2.739376611  | 0.087061317 | 4.82E-215 | HLA-DRB5  | major histocompatibility complex, class II, DR beta 5 [Source:HGNC Symbol;Acc:4953]           |
| 103 | ENSG00000227993 | 2825.290381 | 2.973553933  | 0.094813734 | 1.21E-213 | HLA-DRA   | major histocompatibility complex, class II, DR alpha [Source:HGNC Symbol;Acc:4947]            |
| 104 | ENSG00000164821 | 4960.692544 | -1.916182168 | 0.061110616 | 1.45E-213 | DEFA4     | defensin, alpha 4, corticostatin [Source:HGNC Symbol;Acc:2763]                                |
| 105 | ENSG00000169180 | 14419.78476 | 1.655949137  | 0.053190882 | 1.57E-210 | XPO6      | exportin 6 [Source:HGNC Symbol;Acc:19733]                                                     |
| 106 | ENSG00000268963 | 16792.02765 | 1.380198736  | 0.044470821 | 3.11E-209 | RPL10     | ribosomal protein L10 [Source:HGNC Symbol;Acc:10298]                                          |

|     |                 |             |              |             |           |          |                                                                                                            |
|-----|-----------------|-------------|--------------|-------------|-----------|----------|------------------------------------------------------------------------------------------------------------|
| 107 | ENSG00000085265 | 31441.36093 | -2.059367435 | 0.066356867 | 3.21E-209 | FCN1     | ficolin (collagen/fibrinogen domain containing) 1 [Source:HGNC Symbol;Acc:3623]                            |
| 108 | ENSG00000260881 | 1872.235178 | 3.068034749  | 0.098939048 | 6.99E-209 | TRBC2    | T cell receptor beta constant 2 [Source:HGNC Symbol;Acc:12157]                                             |
| 109 | ENSG00000133574 | 3839.990744 | 2.336821348  | 0.075470614 | 2.89E-208 | GIMAP4   | GTPase, IMAP family member 4 [Source:HGNC Symbol;Acc:21872]                                                |
| 110 | ENSG00000158825 | 7253.684974 | -1.620896056 | 0.052388576 | 5.91E-208 | CDA      | cytidine deaminase [Source:HGNC Symbol;Acc:1712]                                                           |
| 111 | ENSG00000211772 | 1869.49808  | 3.064483135  | 0.099311947 | 7.57E-207 | TRBC2    | T cell receptor beta constant 2 [Source:HGNC Symbol;Acc:12157]                                             |
| 112 | ENSG00000101474 | 11799.6414  | -1.523852231 | 0.049664051 | 1.59E-204 | APMAP    | adipocyte plasma membrane associated protein [Source:HGNC Symbol;Acc:13238]                                |
| 113 | ENSG00000196549 | 7433.704747 | 1.879442693  | 0.06136392  | 8.64E-204 | MME      | membrane metallo-endopeptidase [Source:HGNC Symbol;Acc:7154]                                               |
| 114 | ENSG00000116824 | 1751.05952  | 3.062717221  | 0.100566474 | 1.71E-201 | CD2      | CD2 molecule [Source:HGNC Symbol;Acc:1639]                                                                 |
| 115 | ENSG00000147454 | 12161.85941 | 1.448567759  | 0.047822697 | 2.50E-199 | SLC25A37 | solute carrier family 25 (mitochondrial iron transporter), member 37 [Source:HGNC Symbol;Acc:29786]        |
| 116 | ENSG00000162894 | 2043.415466 | 2.857179709  | 0.094615784 | 4.10E-198 | FAIM3    | Fas apoptotic inhibitory molecule 3 [Source:HGNC Symbol;Acc:14315]                                         |
| 117 | ENSG00000067225 | 15668.5357  | -1.401221818 | 0.046423738 | 6.28E-198 | PKM      | pyruvate kinase, muscle [Source:HGNC Symbol;Acc:9021]                                                      |
| 118 | ENSG00000084070 | 15300.7673  | 1.565483212  | 0.052377038 | 4.37E-194 | SMAP2    | small ArfGAP2 [Source:HGNC Symbol;Acc:25082]                                                               |
| 119 | ENSG00000197063 | 2633.242291 | -2.386300373 | 0.079887964 | 7.46E-194 | MAFG     | v-maf avian musculoaponeurotic fibrosarcoma oncogene homolog G [Source:HGNC Symbol;Acc:6781]               |
| 120 | ENSG00000177954 | 17862.20364 | 1.49850057   | 0.050511723 | 3.25E-191 | RPS27    | ribosomal protein S27 [Source:HGNC Symbol;Acc:10416]                                                       |
| 121 | ENSG00000163464 | 10785.0619  | 1.485700868  | 0.050316627 | 2.00E-189 | CXCR1    | chemokine (C-X-C motif) receptor 1 [Source:HGNC Symbol;Acc:6026]                                           |
| 122 | ENSG00000196126 | 1805.28367  | 2.697924825  | 0.091423589 | 3.27E-189 | HLA-DRB1 | major histocompatibility complex, class II, DR beta 1 [Source:HGNC Symbol;Acc:4948]                        |
| 123 | ENSG00000100453 | 1131.555818 | 3.921826077  | 0.133136954 | 1.55E-188 | GZMB     | granzyme B (granzyme 2, cytotoxic T-lymphocyte-associated serine esterase 1) [Source:HGNC Symbol;Acc:4709] |
| 124 | ENSG00000211829 | 1036.254023 | 4.315523059  | 0.147837919 | 3.82E-185 | TRDC     | T cell receptor delta constant [Source:HGNC Symbol;Acc:12253]                                              |
| 125 | ENSG00000160209 | 4544.72962  | -2.118178642 | 0.072842599 | 9.95E-184 | PDXK     | pyridoxal (pyridoxine, vitamin B6) kinase [Source:HGNC Symbol;Acc:8819]                                    |
| 126 | ENSG00000197965 | 2207.341398 | 2.778041608  | 0.095739709 | 6.03E-183 | MPZL1    | myelin protein zero-like 1 [Source:HGNC Symbol;Acc:7226]                                                   |
| 127 | ENSG00000135636 | 10971.47274 | -1.450229547 | 0.050166825 | 1.39E-181 | DYSF     | dysferlin [Source:HGNC Symbol;Acc:3097]                                                                    |
| 128 | ENSG00000170525 | 2782.49354  | -2.249513778 | 0.077862929 | 2.29E-181 | PFKFB3   | 6-phosphofructo-2-kinase/fructose-2,6-biphosphatase 3 [Source:HGNC Symbol;Acc:8874]                        |
| 129 | ENSG00000121966 | 19637.84825 | -1.389122062 | 0.048334641 | 1.77E-179 | CXCR4    | chemokine (C-X-C motif) receptor 4 [Source:HGNC Symbol;Acc:2561]                                           |
| 130 | ENSG00000113369 | 4256.756843 | 2.152216853  | 0.075321946 | 2.06E-177 | ARRDC3   | arrestin domain containing 3 [Source:HGNC Symbol;Acc:29263]                                                |
| 131 | ENSG00000159496 | 2726.5612   | -2.135529257 | 0.074755767 | 2.49E-177 | RGL4     | ral guanine nucleotide dissociation stimulator-like 4 [Source:HGNC Symbol;Acc:31911]                       |
| 132 | ENSG00000186470 | 4780.027518 | 1.892623395  | 0.066784813 | 1.62E-174 | BTN3A2   | butyrophilin, subfamily 3, member A2 [Source:HGNC Symbol;Acc:1139]                                         |
| 133 | ENSG00000120833 | 1343.31599  | 3.220851491  | 0.113929141 | 1.12E-173 | SOCS2    | suppressor of cytokine signaling 2 [Source:HGNC Symbol;Acc:19382]                                          |
| 134 | ENSG00000026025 | 32823.57673 | -1.175511093 | 0.041630542 | 2.89E-173 | VIM      | vimentin [Source:HGNC Symbol;Acc:12692]                                                                    |

|     |                 |             |              |             |           |          |                                                                                                                   |
|-----|-----------------|-------------|--------------|-------------|-----------|----------|-------------------------------------------------------------------------------------------------------------------|
| 135 | ENSG00000163754 | 3357.240373 | -1.994187967 | 0.070802537 | 2.15E-172 | GYG1     | glycogenin 1 [Source:HGNC Symbol;Acc:4699]                                                                        |
| 136 | ENSG00000185650 | 7089.654676 | 1.527936683  | 0.054551145 | 1.72E-170 | ZFP36L1  | ZFP36 ring finger protein-like 1 [Source:HGNC Symbol;Acc:1107]                                                    |
| 137 | ENSG00000205336 | 2338.918774 | 3.331921608  | 0.118961311 | 1.75E-170 | GPR56    | G protein-coupled receptor 56 [Source:HGNC Symbol;Acc:4512]                                                       |
| 138 | ENSG00000134827 | 6472.599631 | -2.029436084 | 0.072563033 | 5.42E-170 | TCN1     | transcobalamin I (vitamin B12 binding protein, R binder family) [Source:HGNC Symbol;Acc:11652]                    |
| 139 | ENSG00000134539 | 1205.274152 | 3.41229352   | 0.122142734 | 1.28E-169 | KLRD1    | killer cell lectin-like receptor subfamily D, member 1 [Source:HGNC Symbol;Acc:6378]                              |
| 140 | ENSG00000020633 | 2748.986369 | 2.277060639  | 0.081560052 | 2.11E-169 | RUNX3    | runt-related transcription factor 3 [Source:HGNC Symbol;Acc:10473]                                                |
| 141 | ENSG00000144802 | 4231.364553 | -2.033455674 | 0.073085252 | 3.03E-168 | NFKBIZ   | nuclear factor of kappa light polypeptide gene enhancer in B-cells inhibitor, zeta [Source:HGNC Symbol;Acc:29805] |
| 142 | ENSG00000100100 | 1913.930844 | 2.538319466  | 0.09131976  | 6.40E-168 | PIK3IP1  | phosphoinositide-3-kinase interacting protein 1 [Source:HGNC Symbol;Acc:24942]                                    |
| 143 | ENSG00000148154 | 7337.695945 | -1.647454627 | 0.059348902 | 1.79E-167 | UGCG     | UDP-glucose ceramide glucosyltransferase [Source:HGNC Symbol;Acc:12524]                                           |
| 144 | ENSG00000090382 | 82670.64202 | -1.119415799 | 0.040345536 | 2.55E-167 | LYZ      | lysozyme [Source:HGNC Symbol;Acc:6740]                                                                            |
| 145 | ENSG00000110931 | 7295.724615 | -1.495117557 | 0.054001053 | 1.30E-166 | CAMKK2   | calcium/calmodulin-dependent protein kinase kinase 2, beta [Source:HGNC Symbol;Acc:1470]                          |
| 146 | ENSG00000123836 | 2008.456683 | -2.402153654 | 0.086765202 | 1.33E-166 | PFKFB2   | 6-phosphofructo-2-kinase/fructose-2,6-biphosphatase 2 [Source:HGNC Symbol;Acc:8873]                               |
| 147 | ENSG00000123146 | 11066.04704 | 1.908519516  | 0.06907015  | 5.91E-166 | CD97     | CD97 molecule [Source:HGNC Symbol;Acc:1711]                                                                       |
| 148 | ENSG00000152518 | 8891.444518 | 1.458275221  | 0.053061911 | 3.59E-164 | ZFP36L2  | ZFP36 ring finger protein-like 2 [Source:HGNC Symbol;Acc:1108]                                                    |
| 149 | ENSG00000113719 | 4726.824601 | 1.861215269  | 0.067908865 | 2.80E-163 | ERGIC1   | endoplasmic reticulum-golgi intermediate compartment (ERGIC) 1 [Source:HGNC Symbol;Acc:29205]                     |
| 150 | ENSG00000129657 | 9311.148905 | 1.393999228  | 0.051165569 | 2.38E-161 | SEC14L1  | SEC14-like 1 (S. cerevisiae) [Source:HGNC Symbol;Acc:10698]                                                       |
| 151 | ENSG00000111371 | 3494.709181 | 1.93930116   | 0.071269815 | 6.01E-161 | SLC38A1  | solute carrier family 38, member 1 [Source:HGNC Symbol;Acc:13447]                                                 |
| 152 | ENSG00000134198 | 3615.313216 | -1.928999505 | 0.070929048 | 8.87E-161 | TSPAN2   | tetraspanin 2 [Source:HGNC Symbol;Acc:20659]                                                                      |
| 153 | ENSG00000072274 | 2263.83559  | -2.170375527 | 0.080162467 | 2.39E-159 | TFRC     | transferrin receptor [Source:HGNC Symbol;Acc:11763]                                                               |
| 154 | ENSG00000185201 | 32151.25233 | 1.164088696  | 0.043064197 | 7.67E-159 | IFITM2   | interferon induced transmembrane protein 2 [Source:HGNC Symbol;Acc:5413]                                          |
| 155 | ENSG00000170989 | 1146.166816 | 4.138088498  | 0.153535763 | 6.53E-158 | S1PR1    | sphingosine-1-phosphate receptor 1 [Source:HGNC Symbol;Acc:3165]                                                  |
| 156 | ENSG00000196187 | 7565.494652 | -1.468673586 | 0.054540166 | 1.23E-157 | TMEM63A  | transmembrane protein 63A [Source:HGNC Symbol;Acc:29118]                                                          |
| 157 | ENSG00000110852 | 2429.38736  | 2.221252049  | 0.08296451  | 7.84E-156 | CLEC2B   | C-type lectin domain family 2, member B [Source:HGNC Symbol;Acc:2053]                                             |
| 158 | ENSG00000135362 | 1195.063641 | 3.265821626  | 0.122521532 | 1.85E-154 | PRR5L    | proline rich 5 like [Source:HGNC Symbol;Acc:25878]                                                                |
| 159 | ENSG00000073861 | 1002.555074 | 3.528898103  | 0.132690903 | 9.16E-154 | TBX21    | T-box 21 [Source:HGNC Symbol;Acc:11599]                                                                           |
| 160 | ENSG00000196735 | 893.5128549 | 3.354688781  | 0.126271573 | 1.90E-153 | HLA-DQA1 | major histocompatibility complex, class II, DQ alpha 1 [Source:HGNC Symbol;Acc:4942]                              |
| 161 | ENSG00000153292 | 599.2581451 | 4.868896592  | 0.184976164 | 1.26E-150 | GPR110   | G protein-coupled receptor 110 [Source:HGNC Symbol;Acc:18990]                                                     |
| 162 | ENSG00000120306 | 2401.151823 | -2.019811783 | 0.076803184 | 2.30E-150 | CYSTM1   | cysteine-rich transmembrane module containing 1 [Source:HGNC Symbol;Acc:30239]                                    |

|     |                 |             |              |             |           |          |                                                                                                       |
|-----|-----------------|-------------|--------------|-------------|-----------|----------|-------------------------------------------------------------------------------------------------------|
| 163 | ENSG00000142541 | 23602.18642 | 1.181207586  | 0.04497664  | 5.88E-150 | RPL13A   | ribosomal protein L13a [Source:HGNC Symbol;Acc:10304]                                                 |
| 164 | ENSG00000147403 | 4497.967031 | 1.76354833   | 0.067220694 | 1.20E-149 | RPL10    | ribosomal protein L10 [Source:HGNC Symbol;Acc:10298]                                                  |
| 165 | ENSG00000105220 | 6652.244167 | -1.546344055 | 0.058969465 | 1.66E-149 | GPI      | glucose-6-phosphate isomerase [Source:HGNC Symbol;Acc:4458]                                           |
| 166 | ENSG00000177628 | 3669.101036 | -1.717285902 | 0.065673422 | 1.14E-148 | GBA      | glucosidase, beta, acid [Source:HGNC Symbol;Acc:4177]                                                 |
| 167 | ENSG00000132965 | 15603.64452 | -1.465105344 | 0.056040849 | 1.31E-148 | ALOX5AP  | arachidonate 5-lipoxygenase-activating protein [Source:HGNC Symbol;Acc:436]                           |
| 168 | ENSG00000197006 | 5106.234558 | -1.6423388   | 0.063017958 | 1.11E-147 | METTL9   | methyltransferase like 9 [Source:HGNC Symbol;Acc:24586]                                               |
| 169 | ENSG00000231286 | 1147.025742 | 3.674709414  | 0.141178518 | 2.59E-147 | HLA-DQB1 | major histocompatibility complex, class II, DQ beta 1 [Source:HGNC Symbol;Acc:4944]                   |
| 170 | ENSG00000110324 | 4125.223755 | 2.206809064  | 0.085029376 | 1.83E-146 | IL10RA   | interleukin 10 receptor, alpha [Source:HGNC Symbol;Acc:5964]                                          |
| 171 | ENSG00000133805 | 4880.966282 | -1.726578795 | 0.067104187 | 5.93E-144 | AMPD3    | adenosine monophosphate deaminase 3 [Source:HGNC Symbol;Acc:470]                                      |
| 172 | ENSG00000126353 | 940.4332927 | 3.928381526  | 0.153630348 | 3.55E-142 | CCR7     | chemokine (C-C motif) receptor 7 [Source:HGNC Symbol;Acc:1608]                                        |
| 173 | ENSG00000152766 | 762.8557959 | -3.421034295 | 0.133960848 | 8.16E-142 | ANKRD22  | ankyrin repeat domain 22 [Source:HGNC Symbol;Acc:28321]                                               |
| 174 | ENSG00000163346 | 6841.003558 | 1.644497297  | 0.064611373 | 7.19E-141 | PBXIP1   | pre-B-cell leukemia homeobox interacting protein 1 [Source:HGNC Symbol;Acc:21199]                     |
| 175 | ENSG00000131724 | 1842.976698 | 2.573366284  | 0.101267924 | 2.01E-140 | IL13RA1  | interleukin 13 receptor, alpha 1 [Source:HGNC Symbol;Acc:5974]                                        |
| 176 | ENSG00000117115 | 9796.139958 | -1.221714995 | 0.048511344 | 6.36E-138 | PADI2    | peptidyl arginine deiminase, type II [Source:HGNC Symbol;Acc:18341]                                   |
| 177 | ENSG00000034510 | 12073.38645 | 1.245138274  | 0.049470613 | 9.20E-138 | TMSB10   | thymosin beta 10 [Source:HGNC Symbol;Acc:11879]                                                       |
| 178 | ENSG00000109046 | 10509.86253 | -1.335604911 | 0.05307602  | 1.04E-137 | WSB1     | WD repeat and SOCS box containing 1 [Source:HGNC Symbol;Acc:19221]                                    |
| 179 | ENSG00000169385 | 2161.662087 | -1.998471908 | 0.079652281 | 6.69E-137 | RNASE2   | ribonuclease, RNase A family, 2 (liver, eosinophil-derived neurotoxin) [Source:HGNC Symbol;Acc:10045] |
| 180 | ENSG00000164929 | 585.1015209 | 5.41014091   | 0.216709969 | 1.53E-135 | BAALC    | brain and acute leukemia, cytoplasmic [Source:HGNC Symbol;Acc:14333]                                  |
| 181 | ENSG00000113263 | 1887.219746 | 2.523802284  | 0.101171683 | 2.46E-135 | ITK      | IL2-inducible T-cell kinase [Source:HGNC Symbol;Acc:6171]                                             |
| 182 | ENSG00000008517 | 1837.990655 | 2.342466268  | 0.094184756 | 1.58E-134 | IL32     | interleukin 32 [Source:HGNC Symbol;Acc:16830]                                                         |
| 183 | ENSG00000198242 | 7136.592843 | 1.346752021  | 0.054331179 | 1.24E-133 | RPL23A   | ribosomal protein L23a [Source:HGNC Symbol;Acc:10317]                                                 |
| 184 | ENSG00000124102 | 986.5013402 | 3.315152294  | 0.134129373 | 7.31E-133 | PI3      | peptidase inhibitor 3, skin-derived [Source:HGNC Symbol;Acc:8947]                                     |
| 185 | ENSG00000257335 | 9759.431038 | -1.232219999 | 0.049860551 | 7.78E-133 | MGAM     | maltase-glucoamylase (alpha-glucosidase) [Source:HGNC Symbol;Acc:7043]                                |
| 186 | ENSG00000100385 | 1981.847599 | 2.57892681   | 0.104429234 | 1.20E-132 | IL2RB    | interleukin 2 receptor, beta [Source:HGNC Symbol;Acc:6009]                                            |
| 187 | ENSG00000142534 | 16785.21305 | 1.107493555  | 0.044978088 | 7.18E-132 | RPS11    | ribosomal protein S11 [Source:HGNC Symbol;Acc:10384]                                                  |
| 188 | ENSG00000179583 | 1724.08741  | 2.686336156  | 0.109179798 | 1.12E-131 | CIITA    | class II, major histocompatibility complex, transactivator [Source:HGNC Symbol;Acc:7067]              |
| 189 | ENSG00000161960 | 8600.290157 | -1.25104961  | 0.05106058  | 1.42E-130 | EIF4A1   | eukaryotic translation initiation factor 4A1 [Source:HGNC Symbol;Acc:3282]                            |
| 190 | ENSG00000112306 | 12533.05137 | 1.188578426  | 0.048753893 | 2.80E-129 | RPS12    | ribosomal protein S12 [Source:HGNC Symbol;Acc:10385]                                                  |

|     |                 |             |              |             |           |          |                                                                                                                |
|-----|-----------------|-------------|--------------|-------------|-----------|----------|----------------------------------------------------------------------------------------------------------------|
| 191 | ENSG00000112715 | 2815.964555 | -1.976744591 | 0.081153419 | 4.66E-129 | VEGFA    | vascular endothelial growth factor A [Source:HGNC Symbol;Acc:12680]                                            |
| 192 | ENSG00000145649 | 1283.652995 | 2.973720013  | 0.122360297 | 1.78E-128 | GZMA     | granzyme A (granzyme 1, cytotoxic T-lymphocyte-associated serine esterase 3) [Source:HGNC Symbol;Acc:4708]     |
| 193 | ENSG00000196101 | 952.2820357 | 2.978985133  | 0.122629776 | 2.28E-128 | HLA-DRB3 | major histocompatibility complex, class II, DR beta 3 [Source:HGNC Symbol;Acc:4951]                            |
| 194 | ENSG00000026297 | 12918.84272 | 1.155079481  | 0.047585895 | 3.60E-128 | RNASET2  | ribonuclease T2 [Source:HGNC Symbol;Acc:21686]                                                                 |
| 195 | ENSG00000010818 | 1343.302166 | 2.598330134  | 0.107333854 | 1.76E-127 | HIVEP2   | human immunodeficiency virus type I enhancer binding protein 2 [Source:HGNC Symbol;Acc:4921]                   |
| 196 | ENSG00000116679 | 11008.42862 | -1.179438934 | 0.048803653 | 4.72E-127 | IVNS1ABP | influenza virus NS1A binding protein [Source:HGNC Symbol;Acc:16951]                                            |
| 197 | ENSG00000142512 | 3421.864556 | 1.852487266  | 0.076895448 | 2.95E-126 | SIGLEC10 | sialic acid binding Ig-like lectin 10 [Source:HGNC Symbol;Acc:15620]                                           |
| 198 | ENSG00000026950 | 6922.862523 | 1.612077551  | 0.066962127 | 4.37E-126 | BTN3A1   | butyrophilin, subfamily 3, member A1 [Source:HGNC Symbol;Acc:1138]                                             |
| 199 | ENSG00000167286 | 1096.047281 | 2.981402398  | 0.124242529 | 2.84E-125 | CD3D     | CD3d molecule, delta (CD3-TCR complex) [Source:HGNC Symbol;Acc:1673]                                           |
| 200 | ENSG00000167460 | 4683.175272 | 1.574309108  | 0.065750254 | 1.00E-124 | TPM4     | tropomyosin 4 [Source:HGNC Symbol;Acc:12013]                                                                   |
| 201 | ENSG00000167210 | 1070.530164 | -2.606756761 | 0.10909843  | 3.32E-124 | LOXHD1   | lipoxygenase homology domains 1 [Source:HGNC Symbol;Acc:26521]                                                 |
| 202 | ENSG00000111796 | 985.5564149 | 3.17623635   | 0.132939713 | 3.41E-124 | KLRB1    | killer cell lectin-like receptor subfamily B, member 1 [Source:HGNC Symbol;Acc:6373]                           |
| 203 | ENSG00000225373 | 6484.662882 | -1.33847953  | 0.056103709 | 7.85E-124 | WASH5P   | WAS protein family homolog 5 pseudogene [Source:HGNC Symbol;Acc:33884]                                         |
| 204 | ENSG00000138795 | 1552.850065 | 3.211032907  | 0.134851834 | 2.33E-123 | LEF1     | lymphoid enhancer-binding factor 1 [Source:HGNC Symbol;Acc:6551]                                               |
| 205 | ENSG00000043143 | 1613.051203 | 2.3893506    | 0.100496365 | 5.47E-123 | JADE2    | jade family PHD finger 2 [Source:HGNC Symbol;Acc:22984]                                                        |
| 206 | ENSG00000111144 | 11708.39153 | -1.3001335   | 0.054728835 | 8.67E-123 | LTA4H    | leukotriene A4 hydrolase [Source:HGNC Symbol;Acc:6710]                                                         |
| 207 | ENSG00000175274 | 3378.094393 | -2.023346416 | 0.085190058 | 9.71E-123 | TP53I11  | tumor protein p53 inducible protein 11 [Source:HGNC Symbol;Acc:16842]                                          |
| 208 | ENSG00000149516 | 5196.337378 | -1.554550895 | 0.065572023 | 2.71E-122 | MS4A3    | membrane-spanning 4-domains, subfamily A, member 3 (hematopoietic cell-specific) [Source:HGNC Symbol;Acc:7317] |
| 209 | ENSG00000143947 | 14192.56518 | 1.159107788  | 0.049018167 | 1.15E-121 | RPS27A   | ribosomal protein S27a [Source:HGNC Symbol;Acc:10417]                                                          |
| 210 | ENSG00000181036 | 963.6358436 | 3.241358804  | 0.137142373 | 1.50E-121 | FCRL6    | Fc receptor-like 6 [Source:HGNC Symbol;Acc:31910]                                                              |
| 211 | ENSG00000172243 | 10749.73672 | 1.280419515  | 0.054268148 | 3.91E-121 | CLEC7A   | C-type lectin domain family 7, member A [Source:HGNC Symbol;Acc:14558]                                         |
| 212 | ENSG00000143515 | 1931.161184 | 2.553716954  | 0.108372432 | 7.91E-121 | ATP8B2   | ATPase, aminophospholipid transporter, class I, type 8B, member 2 [Source:HGNC Symbol;Acc:13534]               |
| 213 | ENSG00000106560 | 1128.828803 | 2.784862793  | 0.118522307 | 3.89E-120 | GIMAP2   | GTPase, IMAP family member 2 [Source:HGNC Symbol;Acc:21789]                                                    |
| 214 | ENSG00000131018 | 9350.9339   | -1.164981482 | 0.049675544 | 1.11E-119 | SYNE1    | spectrin repeat containing, nuclear envelope 1 [Source:HGNC Symbol;Acc:17089]                                  |
| 215 | ENSG00000142102 | 3776.767507 | 2.504652256  | 0.107100093 | 5.15E-119 | ATHL1    | ATH1, acid trehalase-like 1 (yeast) [Source:HGNC Symbol;Acc:26210]                                             |
| 216 | ENSG00000163660 | 15567.09003 | -1.057808436 | 0.045385321 | 3.24E-118 | CCNL1    | cyclin L1 [Source:HGNC Symbol;Acc:20569]                                                                       |
| 217 | ENSG00000177663 | 13713.04045 | -1.091417209 | 0.046865076 | 5.00E-118 | IL17RA   | interleukin 17 receptor A [Source:HGNC Symbol;Acc:5985]                                                        |
| 218 | ENSG00000112062 | 8594.96187  | -1.217698969 | 0.052749266 | 5.67E-116 | MAPK14   | mitogen-activated protein kinase 14 [Source:HGNC Symbol;Acc:6876]                                              |

|     |                 |             |              |             |           |             |                                                                                                                               |
|-----|-----------------|-------------|--------------|-------------|-----------|-------------|-------------------------------------------------------------------------------------------------------------------------------|
| 219 | ENSG00000234851 | 4419.752078 | 1.432868758  | 0.062125184 | 9.05E-116 | RP11-3P17.3 |                                                                                                                               |
| 220 | ENSG00000086548 | 1939.891567 | -1.983608851 | 0.086063372 | 1.30E-115 | CEACAM6     | carcinoembryonic antigen-related cell adhesion molecule 6 (non-specific cross reacting antigen) [Source:HGNC Symbol;Acc:1818] |
| 221 | ENSG00000101224 | 2178.907118 | 1.867776504  | 0.081138656 | 2.51E-115 | CDC25B      | cell division cycle 25B [Source:HGNC Symbol;Acc:1726]                                                                         |
| 222 | ENSG00000182866 | 1846.276451 | 2.436000756  | 0.105937719 | 4.44E-115 | LCK         | lymphocyte-specific protein tyrosine kinase [Source:HGNC Symbol;Acc:6524]                                                     |
| 223 | ENSG00000173868 | 3051.043035 | 2.262463827  | 0.09846229  | 6.50E-115 | PHOSPHO1    | phosphatase, orphan 1 [Source:HGNC Symbol;Acc:16815]                                                                          |
| 224 | ENSG00000133872 | 8089.844473 | 1.283286476  | 0.055899994 | 1.05E-114 | TMEM66      | transmembrane protein 66 [Source:HGNC Symbol;Acc:28789]                                                                       |
| 225 | ENSG00000055118 | 419.5327722 | -4.801333403 | 0.209347132 | 1.74E-114 | KCNH2       | potassium voltage-gated channel, subfamily H (eag-related), member 2 [Source:HGNC Symbol;Acc:6251]                            |
| 226 | ENSG00000186431 | 1325.651796 | -2.46156105  | 0.107367318 | 2.09E-114 | FCAR        | Fc fragment of IgA, receptor for [Source:HGNC Symbol;Acc:3608]                                                                |
| 227 | ENSG00000197561 | 1714.735907 | -2.730783302 | 0.119173738 | 2.76E-114 | ELANE       | elastase, neutrophil expressed [Source:HGNC Symbol;Acc:3309]                                                                  |
| 228 | ENSG00000057657 | 922.81664   | 3.54083546   | 0.154584758 | 3.36E-114 | PRDM1       | PR domain containing 1, with ZNF domain [Source:HGNC Symbol;Acc:9346]                                                         |
| 229 | ENSG00000144713 | 12531.29946 | 1.121459162  | 0.048982993 | 4.27E-114 | RPL32       | ribosomal protein L32 [Source:HGNC Symbol;Acc:10336]                                                                          |
| 230 | ENSG00000158470 | 5965.636458 | -1.367438807 | 0.059943543 | 2.83E-113 | B4GALT5     | UDP-Gal:betaGlcNAc beta 1,4- galactosyltransferase, polypeptide 5 [Source:HGNC Symbol;Acc:928]                                |
| 231 | ENSG00000111885 | 692.4105451 | 3.433409443  | 0.151112888 | 2.26E-112 | MAN1A1      | mannosidase, alpha, class 1A, member 1 [Source:HGNC Symbol;Acc:6821]                                                          |
| 232 | ENSG00000143369 | 463.2362107 | 5.408511577  | 0.238082818 | 2.46E-112 | ECM1        | extracellular matrix protein 1 [Source:HGNC Symbol;Acc:3153]                                                                  |
| 233 | ENSG00000168016 | 2875.984921 | 1.899154651  | 0.083624449 | 2.83E-112 | TRANK1      | tetratricopeptide repeat and ankyrin repeat containing 1 [Source:HGNC Symbol;Acc:29011]                                       |
| 234 | ENSG00000172543 | 963.9204808 | 3.144852142  | 0.138571425 | 4.03E-112 | CTSW        | cathepsin W [Source:HGNC Symbol;Acc:2546]                                                                                     |
| 235 | ENSG00000069974 | 7702.318466 | -1.247818642 | 0.055085656 | 1.05E-111 | RAB27A      | RAB27A, member RAS oncogene family [Source:HGNC Symbol;Acc:9766]                                                              |
| 236 | ENSG00000111640 | 40752.73012 | -1.064251429 | 0.047051887 | 2.25E-111 | GAPDH       | glyceraldehyde-3-phosphate dehydrogenase [Source:HGNC Symbol;Acc:4141]                                                        |
| 237 | ENSG00000196684 | 6133.854424 | 1.290744193  | 0.057076639 | 2.48E-111 | HSH2D       | hematopoietic SH2 domain containing [Source:HGNC Symbol;Acc:24920]                                                            |
| 238 | ENSG00000007312 | 1027.354333 | 2.789976949  | 0.123691933 | 9.25E-111 | CD79B       | CD79b molecule, immunoglobulin-associated beta [Source:HGNC Symbol;Acc:1699]                                                  |
| 239 | ENSG00000170542 | 1067.968198 | 2.695240225  | 0.119603899 | 1.48E-110 | SERPINB9    | serpin peptidase inhibitor, clade B (ovalbumin), member 9 [Source:HGNC Symbol;Acc:8955]                                       |
| 240 | ENSG00000096063 | 4492.767397 | -1.391104398 | 0.061811919 | 2.86E-110 | SRPK1       | SRSF protein kinase 1 [Source:HGNC Symbol;Acc:11305]                                                                          |
| 241 | ENSG00000150093 | 4127.356991 | 1.502056028  | 0.066790502 | 4.12E-110 | ITGB1       | integrin, beta 1 (fibronectin receptor, beta polypeptide, antigen CD29 includes MDF2, MSK12) [Source:HGNC Symbol;Acc:6153]    |
| 242 | ENSG00000116741 | 38167.46    | 1.064861023  | 0.047375899 | 5.41E-110 | RGS2        | regulator of G-protein signaling 2, 24kDa [Source:HGNC Symbol;Acc:9998]                                                       |
| 243 | ENSG00000127152 | 1077.471349 | 2.76657284   | 0.123150723 | 7.04E-110 | BCL11B      | B-cell CLL/lymphoma 11B (zinc finger protein) [Source:HGNC Symbol;Acc:13222]                                                  |
| 244 | ENSG00000069667 | 1639.780496 | 2.453885773  | 0.109236315 | 7.16E-110 | RORA        | RAR-related orphan receptor A [Source:HGNC Symbol;Acc:10258]                                                                  |
| 245 | ENSG00000205269 | 3381.565634 | -1.625022891 | 0.072388073 | 1.01E-109 | TMEM170B    | transmembrane protein 170B [Source:HGNC Symbol;Acc:34244]                                                                     |
| 246 | ENSG00000166710 | 148333.4559 | 1.03308026   | 0.046072852 | 1.80E-109 | B2M         | beta-2-microglobulin [Source:HGNC Symbol;Acc:914]                                                                             |

|     |                 |             |              |             |           |          |                                                                                                                               |
|-----|-----------------|-------------|--------------|-------------|-----------|----------|-------------------------------------------------------------------------------------------------------------------------------|
| 247 | ENSG00000272939 | 2644.038176 | -1.680386895 | 0.074995003 | 2.57E-109 | CEACAM6  | carcinoembryonic antigen-related cell adhesion molecule 6 (non-specific cross reacting antigen) [Source:HGNC Symbol;Acc:1818] |
| 248 | ENSG00000113070 | 395.5386346 | -4.70400223  | 0.209998889 | 2.96E-109 | HBEGF    | heparin-binding EGF-like growth factor [Source:HGNC Symbol;Acc:3059]                                                          |
| 249 | ENSG00000105501 | 6512.616979 | -1.230444402 | 0.055175567 | 2.74E-108 | SIGLEC5  | sialic acid binding Ig-like lectin 5 [Source:HGNC Symbol;Acc:10874]                                                           |
| 250 | ENSG00000204287 | 1353.762119 | 3.076296706  | 0.137967033 | 2.94E-108 | HLA-DRA  | major histocompatibility complex, class II, DR alpha [Source:HGNC Symbol;Acc:4947]                                            |
| 251 | ENSG00000139626 | 1690.03551  | 2.2395378    | 0.10056337  | 5.39E-108 | ITGB7    | integrin, beta 7 [Source:HGNC Symbol;Acc:6162]                                                                                |
| 252 | ENSG00000123689 | 1911.74417  | -2.072997737 | 0.093214465 | 1.07E-107 | G0S2     | G0/G1switch 2 [Source:HGNC Symbol;Acc:30229]                                                                                  |
| 253 | ENSG00000213626 | 2337.919732 | 2.043107026  | 0.091962452 | 1.75E-107 | LBH      | limb bud and heart development [Source:HGNC Symbol;Acc:29532]                                                                 |
| 254 | ENSG00000186174 | 1591.932926 | 2.242130104  | 0.101177692 | 6.11E-107 | BCL9L    | B-cell CLL/lymphoma 9-like [Source:HGNC Symbol;Acc:23688]                                                                     |
| 255 | ENSG00000064270 | 1104.936444 | -2.336675311 | 0.105582566 | 1.16E-106 | ATP2C2   | ATPase, Ca <sup>++</sup> transporting, type 2C, member 2 [Source:HGNC Symbol;Acc:29103]                                       |
| 256 | ENSG00000213741 | 5597.257168 | 1.287964539  | 0.058361204 | 4.60E-106 | RPS29    | ribosomal protein S29 [Source:HGNC Symbol;Acc:10419]                                                                          |
| 257 | ENSG00000156508 | 156599.287  | 0.968769779  | 0.043920327 | 5.90E-106 | EEF1A1   | eukaryotic translation elongation factor 1 alpha 1 [Source:HGNC Symbol;Acc:3189]                                              |
| 258 | ENSG00000173391 | 1836.88005  | -1.859710018 | 0.084485667 | 1.60E-105 | OLR1     | oxidized low density lipoprotein (lectin-like) receptor 1 [Source:HGNC Symbol;Acc:8133]                                       |
| 259 | ENSG00000111801 | 2285.612253 | 1.95926131   | 0.089166508 | 3.77E-105 | BTN3A3   | butyrophilin, subfamily 3, member A3 [Source:HGNC Symbol;Acc:1140]                                                            |
| 260 | ENSG00000070371 | 2331.626453 | -1.940870977 | 0.088388628 | 5.18E-105 | CLTCL1   | clathrin, heavy chain-like 1 [Source:HGNC Symbol;Acc:2093]                                                                    |
| 261 | ENSG00000021355 | 10856.5001  | -1.027642237 | 0.046877892 | 1.16E-104 | SERPINB1 | serpin peptidase inhibitor, clade B (ovalbumin), member 1 [Source:HGNC Symbol;Acc:3311]                                       |
| 262 | ENSG00000104043 | 3929.436194 | -1.681438348 | 0.076726217 | 1.34E-104 | ATP8B4   | ATPase, class I, type 8B, member 4 [Source:HGNC Symbol;Acc:13536]                                                             |
| 263 | ENSG00000136156 | 27868.89435 | 1.006999366  | 0.046018421 | 2.71E-104 | ITM2B    | integral membrane protein 2B [Source:HGNC Symbol;Acc:6174]                                                                    |
| 264 | ENSG00000107438 | 715.1306032 | 3.114193621  | 0.142608504 | 7.27E-104 | PDLIM1   | PDZ and LIM domain 1 [Source:HGNC Symbol;Acc:2067]                                                                            |
| 265 | ENSG00000121691 | 5078.134138 | -1.330544819 | 0.060947474 | 8.32E-104 | CAT      | catalase [Source:HGNC Symbol;Acc:1516]                                                                                        |
| 266 | ENSG00000109743 | 4529.130087 | -1.529070306 | 0.07009944  | 1.23E-103 | BST1     | bone marrow stromal cell antigen 1 [Source:HGNC Symbol;Acc:1118]                                                              |
| 267 | ENSG00000127334 | 1525.093947 | 2.167045971  | 0.099444683 | 1.96E-103 | DYRK2    | dual-specificity tyrosine-(Y)-phosphorylation regulated kinase 2 [Source:HGNC Symbol;Acc:3093]                                |
| 268 | ENSG00000165801 | 1222.857084 | 2.920461735  | 0.134145114 | 3.06E-103 | ARHGEF40 | Rho guanine nucleotide exchange factor (GEF) 40 [Source:HGNC Symbol;Acc:25516]                                                |
| 269 | ENSG00000100365 | 18260.55526 | -1.136236656 | 0.052307083 | 8.76E-103 | NCF4     | neutrophil cytosolic factor 4, 40kDa [Source:HGNC Symbol;Acc:7662]                                                            |
| 270 | ENSG00000026751 | 1309.055016 | 2.698900601  | 0.124523183 | 2.51E-102 | SLAMF7   | SLAM family member 7 [Source:HGNC Symbol;Acc:21394]                                                                           |
| 271 | ENSG00000185624 | 6812.811387 | -1.197967343 | 0.055298491 | 3.12E-102 | P4HB     | prolyl 4-hydroxylase, beta polypeptide [Source:HGNC Symbol;Acc:8548]                                                          |
| 272 | ENSG00000122862 | 51247.64533 | -1.070692349 | 0.049441946 | 3.71E-102 | SRGN     | serglycin [Source:HGNC Symbol;Acc:9361]                                                                                       |
| 273 | ENSG00000198755 | 7725.94879  | 1.148562244  | 0.053091747 | 5.95E-102 | RPL10A   | ribosomal protein L10a [Source:HGNC Symbol;Acc:10299]                                                                         |
| 274 | ENSG00000156482 | 12713.14211 | 1.092510045  | 0.050586572 | 1.31E-101 | RPL30    | ribosomal protein L30 [Source:HGNC Symbol;Acc:10333]                                                                          |



|     |                 |             |              |             |           |         |                                                                                            |
|-----|-----------------|-------------|--------------|-------------|-----------|---------|--------------------------------------------------------------------------------------------|
| 275 | ENSG00000167526 | 12941.82975 | 1.267662056  | 0.058718694 | 1.56E-101 | RPL13   | ribosomal protein L13 [Source:HGNC Symbol;Acc:10303]                                       |
| 276 | ENSG00000127824 | 6373.718871 | -1.293992068 | 0.059963809 | 1.90E-101 | TUBA4A  | tubulin, alpha 4a [Source:HGNC Symbol;Acc:12407]                                           |
| 277 | ENSG00000105369 | 696.8990772 | 3.208238818  | 0.148923125 | 4.17E-101 | CD79A   | CD79a molecule, immunoglobulin-associated alpha [Source:HGNC Symbol;Acc:1698]              |
| 278 | ENSG00000136810 | 5140.232985 | -1.391538194 | 0.064620476 | 5.03E-101 | TXN     | thioredoxin [Source:HGNC Symbol;Acc:12435]                                                 |
| 279 | ENSG00000272985 | 697.1699685 | 3.203081271  | 0.148757334 | 5.21E-101 | CD79A   | CD79a molecule, immunoglobulin-associated alpha [Source:HGNC Symbol;Acc:1698]              |
| 280 | ENSG00000183625 | 1296.85651  | 2.938414579  | 0.136608544 | 8.43E-101 | CCR3    | chemokine (C-C motif) receptor 3 [Source:HGNC Symbol;Acc:1604]                             |
| 281 | ENSG00000188229 | 3969.250481 | -1.564722157 | 0.072820209 | 1.36E-100 | TUBB4B  | tubulin, beta 4B class IVb [Source:HGNC Symbol;Acc:20771]                                  |
| 282 | ENSG00000090376 | 5778.935712 | -1.292979906 | 0.060211398 | 1.81E-100 | IRAK3   | interleukin-1 receptor-associated kinase 3 [Source:HGNC Symbol;Acc:17020]                  |
| 283 | ENSG00000102010 | 769.1950848 | -2.790626229 | 0.130370354 | 7.87E-100 | BMX     | BMX non-receptor tyrosine kinase [Source:HGNC Symbol;Acc:1079]                             |
| 284 | ENSG00000139572 | 801.1131941 | -2.701526405 | 0.126458818 | 1.95E-99  | GPR84   | G protein-coupled receptor 84 [Source:HGNC Symbol;Acc:4535]                                |
| 285 | ENSG00000213203 | 841.1342801 | 3.001990687  | 0.140773436 | 4.37E-99  | GIMAP1  | GTPase, IMAP family member 1 [Source:HGNC Symbol;Acc:23237]                                |
| 286 | ENSG00000153064 | 1125.247408 | 2.390003793  | 0.112301052 | 1.09E-98  | BANK1   | B-cell scaffold protein with ankyrin repeats 1 [Source:HGNC Symbol;Acc:18233]              |
| 287 | ENSG00000103811 | 2298.795779 | -1.81048031  | 0.085126361 | 1.46E-98  | CTSH    | cathepsin H [Source:HGNC Symbol;Acc:2535]                                                  |
| 288 | ENSG00000110400 | 1230.701587 | -2.289331271 | 0.107752766 | 2.33E-98  | PVRL1   | poliovirus receptor-related 1 (herpesvirus entry mediator C) [Source:HGNC Symbol;Acc:9706] |
| 289 | ENSG00000173930 | 2290.627375 | -1.671226034 | 0.078724135 | 3.35E-98  | SLCO4C1 | solute carrier organic anion transporter family, member 4C1 [Source:HGNC Symbol;Acc:23612] |
| 290 | ENSG00000261371 | 10966.96299 | 1.145342542  | 0.054003473 | 5.12E-98  | PECAM1  | platelet/endothelial cell adhesion molecule 1 [Source:HGNC Symbol;Acc:8823]                |
| 291 | ENSG00000125347 | 5394.453764 | 1.270324416  | 0.059917212 | 5.97E-98  | IRF1    | interferon regulatory factor 1 [Source:HGNC Symbol;Acc:6116]                               |
| 292 | ENSG00000062716 | 7174.908483 | 1.209966519  | 0.057098039 | 7.40E-98  | VMP1    | vacuole membrane protein 1 [Source:HGNC Symbol;Acc:29559]                                  |
| 293 | ENSG00000175567 | 3466.490089 | 1.539350105  | 0.072764818 | 1.58E-97  | UCP2    | uncoupling protein 2 (mitochondrial, proton carrier) [Source:HGNC Symbol;Acc:12518]        |
| 294 | ENSG00000177606 | 1342.242642 | -2.050971576 | 0.097037314 | 2.37E-97  | JUN     | jun proto-oncogene [Source:HGNC Symbol;Acc:6204]                                           |
| 295 | ENSG00000163823 | 972.7127229 | 2.931283443  | 0.138741335 | 2.81E-97  | CCR1    | chemokine (C-C motif) receptor 1 [Source:HGNC Symbol;Acc:1602]                             |
| 296 | ENSG00000160654 | 852.0484757 | 2.89382385   | 0.137234529 | 6.66E-97  | CD3G    | CD3g molecule, gamma (CD3-TCR complex) [Source:HGNC Symbol;Acc:1675]                       |
| 297 | ENSG00000162551 | 803.8266026 | 3.468020769  | 0.164673451 | 1.17E-96  | ALPL    | alkaline phosphatase, liver/bone/kidney [Source:HGNC Symbol;Acc:438]                       |
| 298 | ENSG00000198830 | 17580.28631 | -1.014532766 | 0.048256548 | 2.50E-96  | HMG2    | high mobility group nucleosomal binding domain 2 [Source:HGNC Symbol;Acc:4986]             |
| 299 | ENSG00000172322 | 9757.996072 | -1.160639406 | 0.055281945 | 4.57E-96  | CLEC12A | C-type lectin domain family 12, member A [Source:HGNC Symbol;Acc:31713]                    |
| 300 | ENSG00000160888 | 9937.03649  | -1.196087853 | 0.056974463 | 4.70E-96  | IER2    | immediate early response 2 [Source:HGNC Symbol;Acc:28871]                                  |
| 301 | ENSG00000138119 | 793.7979527 | -2.734834976 | 0.130576159 | 1.31E-95  | MYOF    | myoferlin [Source:HGNC Symbol;Acc:3656]                                                    |
| 302 | ENSG00000071575 | 1196.824917 | 2.299484723  | 0.109891746 | 1.96E-95  | TRIB2   | tribbles pseudokinase 2 [Source:HGNC Symbol;Acc:30809]                                     |

|     |                 |             |              |             |          |         |                                                                                                                                                                                                                                 |
|-----|-----------------|-------------|--------------|-------------|----------|---------|---------------------------------------------------------------------------------------------------------------------------------------------------------------------------------------------------------------------------------|
| 303 | ENSG00000171488 | 1005.380894 | 2.61895502   | 0.125227236 | 2.49E-95 | LRRRC8C | leucine rich repeat containing 8 family, member C [Source:HGNC Symbol;Acc:25075]                                                                                                                                                |
| 304 | ENSG00000087253 | 3575.435975 | -1.387977156 | 0.066373632 | 2.59E-95 | LPCAT2  | lysophosphatidylcholine acyltransferase 2 [Source:HGNC Symbol;Acc:26032]                                                                                                                                                        |
| 305 | ENSG00000180739 | 605.8355561 | 3.555962388  | 0.170243423 | 4.27E-95 | S1PR5   | sphingosine-1-phosphate receptor 5 [Source:HGNC Symbol;Acc:14299]                                                                                                                                                               |
| 306 | ENSG00000197956 | 20193.68435 | -0.983195858 | 0.047076461 | 4.48E-95 | S100A6  | S100 calcium binding protein A6 [Source:HGNC Symbol;Acc:10496]                                                                                                                                                                  |
| 307 | ENSG00000167552 | 6396.807448 | 1.18685261   | 0.056849096 | 5.26E-95 | TUBA1A  | tubulin, alpha 1a [Source:HGNC Symbol;Acc:20766]                                                                                                                                                                                |
| 308 | ENSG00000168461 | 7954.499973 | -1.174629595 | 0.05630144  | 7.02E-95 | RAB31   | RAB31, member RAS oncogene family [Source:HGNC Symbol;Acc:9771]                                                                                                                                                                 |
| 309 | ENSG00000091592 | 11078.16744 | 1.072736263  | 0.051426292 | 7.54E-95 | NLRP1   | NLR family, pyrin domain containing 1 [Source:HGNC Symbol;Acc:14374]                                                                                                                                                            |
| 310 | ENSG00000116852 | 6964.871442 | -1.197852071 | 0.057435094 | 8.16E-95 | KIF21B  | kinesin family member 21B [Source:HGNC Symbol;Acc:29442]                                                                                                                                                                        |
| 311 | ENSG00000149273 | 17070.69401 | 0.963678653  | 0.046219072 | 9.13E-95 | RPS3    | ribosomal protein S3 [Source:HGNC Symbol;Acc:10420]                                                                                                                                                                             |
| 312 | ENSG00000203747 | 7287.697948 | 1.239081911  | 0.059489955 | 1.43E-94 | FCGR3A  | Fc fragment of IgG, low affinity IIIa, receptor (CD16a) [Source:HGNC Symbol;Acc:3619]                                                                                                                                           |
| 313 | ENSG00000092841 | 30110.08224 | -0.895098039 | 0.043073424 | 3.86E-94 | MYL6    | myosin, light chain 6, alkali, smooth muscle and non-muscle [Source:HGNC Symbol;Acc:7587]                                                                                                                                       |
| 314 | ENSG00000145113 | 407.9791412 | 5.89522431   | 0.283992228 | 6.13E-94 | MUC4    | mucin 4, cell surface associated [Source:HGNC Symbol;Acc:7514]                                                                                                                                                                  |
| 315 | ENSG00000226260 | 1709.767649 | 2.751410484  | 0.132927264 | 2.12E-93 | HLA-DRA | major histocompatibility complex, class II, DR alpha [Source:HGNC Symbol;Acc:4947]                                                                                                                                              |
| 316 | ENSG00000105373 | 2151.146373 | 2.037289718  | 0.098753078 | 8.72E-93 | GLTSCR2 | glioma tumor suppressor candidate region gene 2 [Source:HGNC Symbol;Acc:4333]                                                                                                                                                   |
| 317 | ENSG00000254772 | 18716.62717 | 0.891205838  | 0.04331807  | 2.80E-92 | EEF1G   | eukaryotic translation elongation factor 1 gamma [Source:HGNC Symbol;Acc:3213]                                                                                                                                                  |
| 318 | ENSG00000272207 | 2023.776337 | 1.845172718  | 0.089840817 | 5.77E-92 | PLEKHO1 | Pleckstrin homology domain containing, family O member 1; Pleckstrin homology domain containing, family O member 1, isoform CRA_c; Pleckstrin homology domain-containing family O member 1 [Source:UniProtKB/TrEMBL;Acc:Q5T4P9] |
| 319 | ENSG00000122966 | 520.5254466 | -3.200671668 | 0.156114069 | 1.21E-91 | CIT     | citron (rho-interacting, serine/threonine kinase 21) [Source:HGNC Symbol;Acc:1985]                                                                                                                                              |
| 320 | ENSG00000135842 | 6094.653395 | 1.3699283    | 0.066872676 | 1.69E-91 | FAM129A | family with sequence similarity 129, member A [Source:HGNC Symbol;Acc:16784]                                                                                                                                                    |
| 321 | ENSG00000159399 | 3283.764601 | -1.348977242 | 0.065861668 | 1.82E-91 | HK2     | hexokinase 2 [Source:HGNC Symbol;Acc:4923]                                                                                                                                                                                      |
| 322 | ENSG00000055332 | 3095.264541 | -1.532212882 | 0.074930555 | 3.60E-91 | EIF2AK2 | eukaryotic translation initiation factor 2-alpha kinase 2 [Source:HGNC Symbol;Acc:9437]                                                                                                                                         |
| 323 | ENSG00000184009 | 21244.4714  | -0.940481392 | 0.046132832 | 1.28E-90 | ACTG1   | actin, gamma 1 [Source:HGNC Symbol;Acc:144]                                                                                                                                                                                     |
| 324 | ENSG00000106789 | 1693.643808 | -1.826605177 | 0.089652508 | 1.63E-90 | CORO2A  | coronin, actin binding protein, 2A [Source:HGNC Symbol;Acc:2255]                                                                                                                                                                |
| 325 | ENSG00000069702 | 700.4305376 | 3.321354734  | 0.16313885  | 2.22E-90 | TGFBR3  | transforming growth factor, beta receptor III [Source:HGNC Symbol;Acc:11774]                                                                                                                                                    |
| 326 | ENSG00000267807 | 21243.23327 | -0.939754067 | 0.04620678  | 3.40E-90 | ACTG1   | actin, gamma 1 [Source:HGNC Symbol;Acc:144]                                                                                                                                                                                     |
| 327 | ENSG00000100316 | 21834.57505 | 1.067349279  | 0.052526182 | 4.86E-90 | RPL3    | ribosomal protein L3 [Source:HGNC Symbol;Acc:10332]                                                                                                                                                                             |
| 328 | ENSG00000163812 | 2977.669739 | -1.511031232 | 0.074382749 | 5.49E-90 | ZDHC3   | zinc finger, DHC-type containing 3 [Source:HGNC Symbol;Acc:18470]                                                                                                                                                               |
| 329 | ENSG00000054523 | 2275.800687 | -1.536022434 | 0.075766287 | 1.26E-89 | KIF1B   | kinesin family member 1B [Source:HGNC Symbol;Acc:16636]                                                                                                                                                                         |
| 330 | ENSG00000139679 | 999.8307564 | 2.312181788  | 0.114207347 | 2.21E-89 | LPAR6   | lysophosphatidic acid receptor 6 [Source:HGNC Symbol;Acc:15520]                                                                                                                                                                 |

|     |                 |             |              |             |          |          |                                                                                                |
|-----|-----------------|-------------|--------------|-------------|----------|----------|------------------------------------------------------------------------------------------------|
| 331 | ENSG00000182162 | 2836.881108 | 1.531093826  | 0.075632569 | 2.28E-89 | P2RY8    | purinergic receptor P2Y, G-protein coupled, 8 [Source:HGNC Symbol;Acc:15524]                   |
| 332 | ENSG00000170476 | 689.1898666 | 3.416648055  | 0.168805082 | 2.44E-89 | MZB1     | marginal zone B and B1 cell-specific protein [Source:HGNC Symbol;Acc:30125]                    |
| 333 | ENSG00000171115 | 906.2924568 | 2.480834098  | 0.122637091 | 3.05E-89 | GIMAP8   | GTPase, IMAP family member 8 [Source:HGNC Symbol;Acc:21792]                                    |
| 334 | ENSG00000160796 | 22543.25146 | -1.127475408 | 0.055747655 | 3.33E-89 | NBEAL2   | neurobeachin-like 2 [Source:HGNC Symbol;Acc:31928]                                             |
| 335 | ENSG00000260916 | 7036.372515 | -1.104688573 | 0.054673932 | 4.94E-89 | CCPG1    | cell cycle progression 1 [Source:HGNC Symbol;Acc:24227]                                        |
| 336 | ENSG00000163736 | 575.4340925 | 3.277879532  | 0.16231658  | 6.11E-89 | PPBP     | pro-platelet basic protein (chemokine (C-X-C motif) ligand 7) [Source:HGNC Symbol;Acc:9240]    |
| 337 | ENSG00000155657 | 9907.673688 | -1.503600154 | 0.074475508 | 6.77E-89 | TTN      | titin [Source:HGNC Symbol;Acc:12403]                                                           |
| 338 | ENSG00000099204 | 1686.968092 | 2.015552231  | 0.099854282 | 7.35E-89 | ABLIM1   | actin binding LIM protein 1 [Source:HGNC Symbol;Acc:78]                                        |
| 339 | ENSG00000229314 | 1547.559631 | -1.824112752 | 0.090662209 | 2.73E-88 | ORM1     | orosomucoid 1 [Source:HGNC Symbol;Acc:8498]                                                    |
| 340 | ENSG00000070081 | 2378.561    | -1.530599086 | 0.0762149   | 5.76E-88 | NUCB2    | nucleobindin 2 [Source:HGNC Symbol;Acc:8044]                                                   |
| 341 | ENSG00000075303 | 1687.42502  | -1.987461879 | 0.099024962 | 7.36E-88 | SLC25A40 | solute carrier family 25, member 40 [Source:HGNC Symbol;Acc:29680]                             |
| 342 | ENSG00000138449 | 3179.752607 | -1.387482505 | 0.069141634 | 7.81E-88 | SLC40A1  | solute carrier family 40 (iron-regulated transporter), member 1 [Source:HGNC Symbol;Acc:10909] |
| 343 | ENSG00000081189 | 1021.855874 | 2.323926009  | 0.115808796 | 7.84E-88 | MEF2C    | myocyte enhancer factor 2C [Source:HGNC Symbol;Acc:6996]                                       |
| 344 | ENSG00000162739 | 1102.186491 | 2.514051976  | 0.125324091 | 8.91E-88 | SLAMF6   | SLAM family member 6 [Source:HGNC Symbol;Acc:21392]                                            |
| 345 | ENSG00000215788 | 640.4795383 | 3.224418767  | 0.161071163 | 2.06E-87 | TNFRSF25 | tumor necrosis factor receptor superfamily, member 25 [Source:HGNC Symbol;Acc:11910]           |
| 346 | ENSG00000075624 | 223039.0368 | -0.877333432 | 0.043834062 | 2.21E-87 | ACTB     | actin, beta [Source:HGNC Symbol;Acc:132]                                                       |
| 347 | ENSG00000135046 | 14375.22779 | -1.008010242 | 0.05039952  | 2.95E-87 | ANXA1    | annexin A1 [Source:HGNC Symbol;Acc:533]                                                        |
| 348 | ENSG00000170801 | 754.9287285 | -2.609714395 | 0.13059932  | 4.20E-87 | HTRA3    | Htra serine peptidase 3 [Source:HGNC Symbol;Acc:30406]                                         |
| 349 | ENSG00000116260 | 3991.597624 | -1.52190287  | 0.076227161 | 5.91E-87 | QSOX1    | quiescin Q6 sulfhydryl oxidase 1 [Source:HGNC Symbol;Acc:9756]                                 |
| 350 | ENSG00000110042 | 1456.535794 | -1.828371538 | 0.091680012 | 9.22E-87 | DTX4     | deltex homolog 4 (Drosophila) [Source:HGNC Symbol;Acc:29151]                                   |
| 351 | ENSG00000206240 | 803.3164424 | 2.503837157  | 0.125641608 | 1.23E-86 | HLA-DRB1 | major histocompatibility complex, class II, DR beta 1 [Source:HGNC Symbol;Acc:4948]            |
| 352 | ENSG00000206306 | 803.1273502 | 2.503315342  | 0.125658276 | 1.41E-86 | HLA-DRB1 | major histocompatibility complex, class II, DR beta 1 [Source:HGNC Symbol;Acc:4948]            |
| 353 | ENSG00000188313 | 2494.717299 | -1.648886567 | 0.083331929 | 2.04E-85 | PLSCR1   | phospholipid scramblase 1 [Source:HGNC Symbol;Acc:9092]                                        |
| 354 | ENSG00000198034 | 10495.04208 | 1.115195046  | 0.056398551 | 2.66E-85 | RPS4X    | ribosomal protein S4, X-linked [Source:HGNC Symbol;Acc:10424]                                  |
| 355 | ENSG00000182718 | 1896.623574 | 1.823331246  | 0.092228638 | 2.86E-85 | ANXA2    | annexin A2 [Source:HGNC Symbol;Acc:537]                                                        |
| 356 | ENSG00000182885 | 8817.652537 | -1.136262495 | 0.057737906 | 1.69E-84 | GPR97    | G protein-coupled receptor 97 [Source:HGNC Symbol;Acc:13728]                                   |
| 357 | ENSG00000108518 | 40279.53334 | -0.869393695 | 0.044308281 | 5.31E-84 | PFN1     | profilin 1 [Source:HGNC Symbol;Acc:8881]                                                       |
| 358 | ENSG00000186205 | 2387.531215 | -1.684395713 | 0.086008037 | 1.10E-83 | MARC1    | mitochondrial amidoxime reducing component 1 [Source:HGNC Symbol;Acc:26189]                    |

|     |                 |             |              |             |          |          |                                                                                                                                         |
|-----|-----------------|-------------|--------------|-------------|----------|----------|-----------------------------------------------------------------------------------------------------------------------------------------|
| 359 | ENSG00000185905 | 3903.870097 | 1.293004604  | 0.066098012 | 1.70E-83 | C16orf54 | chromosome 16 open reading frame 54 [Source:HGNC Symbol;Acc:26649]                                                                      |
| 360 | ENSG00000143797 | 3403.525742 | -1.466837581 | 0.075124617 | 3.47E-83 | MBOAT2   | membrane bound O-acyltransferase domain containing 2 [Source:HGNC Symbol;Acc:25193]                                                     |
| 361 | ENSG00000142676 | 14647.94637 | 0.932767519  | 0.047815088 | 4.89E-83 | RPL11    | ribosomal protein L11 [Source:HGNC Symbol;Acc:10301]                                                                                    |
| 362 | ENSG00000143847 | 1576.520224 | -1.749676755 | 0.089971017 | 1.59E-82 | PPFIA4   | protein tyrosine phosphatase, receptor type, f polypeptide (PTPRF), interacting protein (liprin), alpha 4 [Source:HGNC Symbol;Acc:9248] |
| 363 | ENSG00000258227 | 1114.074184 | -2.143809369 | 0.110369994 | 2.50E-82 | CLEC5A   | C-type lectin domain family 5, member A [Source:HGNC Symbol;Acc:2054]                                                                   |
| 364 | ENSG00000261180 | 1113.999682 | -2.143339545 | 0.110415086 | 3.16E-82 | CLEC5A   | C-type lectin domain family 5, member A [Source:HGNC Symbol;Acc:2054]                                                                   |
| 365 | ENSG00000166441 | 12546.8517  | 0.909546548  | 0.046888155 | 4.10E-82 | RPL27A   | ribosomal protein L27a [Source:HGNC Symbol;Acc:10329]                                                                                   |
| 366 | ENSG00000118922 | 1069.383808 | 2.524238253  | 0.130142636 | 4.27E-82 | KLF12    | Kruppel-like factor 12 [Source:HGNC Symbol;Acc:6346]                                                                                    |
| 367 | ENSG00000149269 | 8290.058921 | -1.062429896 | 0.054793452 | 4.81E-82 | PAK1     | p21 protein (Cdc42/Rac)-activated kinase 1 [Source:HGNC Symbol;Acc:8590]                                                                |
| 368 | ENSG00000118523 | 342.5628385 | 5.962654713  | 0.308420485 | 1.44E-81 | CTGF     | connective tissue growth factor [Source:HGNC Symbol;Acc:2500]                                                                           |
| 369 | ENSG00000173200 | 2114.52371  | 1.661509158  | 0.086051175 | 2.32E-81 | PARP15   | poly (ADP-ribose) polymerase family, member 15 [Source:HGNC Symbol;Acc:26876]                                                           |
| 370 | ENSG00000028137 | 9967.310737 | 1.180995474  | 0.061277739 | 4.59E-81 | TNFRSF1B | tumor necrosis factor receptor superfamily, member 1B [Source:HGNC Symbol;Acc:11917]                                                    |
| 371 | ENSG00000124181 | 1546.521992 | 1.89664749   | 0.098424651 | 4.83E-81 | PLCG1    | phospholipase C, gamma 1 [Source:HGNC Symbol;Acc:9065]                                                                                  |
| 372 | ENSG00000178904 | 2234.20161  | -1.574303401 | 0.081724635 | 5.47E-81 | DPY19L3  | dpy-19-like 3 (C. elegans) [Source:HGNC Symbol;Acc:27120]                                                                               |
| 373 | ENSG00000110448 | 804.9060986 | 2.708148123  | 0.140706075 | 7.53E-81 | CD5      | CD5 molecule [Source:HGNC Symbol;Acc:1685]                                                                                              |
| 374 | ENSG00000111052 | 2086.473275 | -1.659655595 | 0.086270425 | 8.93E-81 | LIN7A    | lin-7 homolog A (C. elegans) [Source:HGNC Symbol;Acc:17787]                                                                             |
| 375 | ENSG00000198168 | 2686.451175 | -1.60960143  | 0.083833766 | 1.85E-80 | SVIP     | small VCP/p97-interacting protein [Source:HGNC Symbol;Acc:25238]                                                                        |
| 376 | ENSG00000128284 | 1090.666228 | 2.147742935  | 0.112177285 | 5.20E-80 | APOL3    | apolipoprotein L, 3 [Source:HGNC Symbol;Acc:14868]                                                                                      |
| 377 | ENSG00000027075 | 1683.038912 | 1.867144824  | 0.09759834  | 6.93E-80 | PRKCH    | protein kinase C, eta [Source:HGNC Symbol;Acc:9403]                                                                                     |
| 378 | ENSG00000136717 | 731.1860342 | 3.140124062  | 0.164241641 | 8.70E-80 | BIN1     | bridging integrator 1 [Source:HGNC Symbol;Acc:1052]                                                                                     |
| 379 | ENSG00000082512 | 1036.05237  | 2.318359529  | 0.121264486 | 8.80E-80 | TRAF5    | TNF receptor-associated factor 5 [Source:HGNC Symbol;Acc:12035]                                                                         |
| 380 | ENSG00000188536 | 80142.31924 | 4.724631379  | 0.247386471 | 1.29E-79 | HBA2     | hemoglobin, alpha 2 [Source:HGNC Symbol;Acc:4824]                                                                                       |
| 381 | ENSG00000006459 | 5908.530435 | -1.218679756 | 0.063813113 | 1.30E-79 | KDM7A    | lysine (K)-specific demethylase 7A [Source:HGNC Symbol;Acc:22224]                                                                       |
| 382 | ENSG00000123240 | 1043.455229 | 2.198181132  | 0.115103185 | 1.30E-79 | OPTN     | optineurin [Source:HGNC Symbol;Acc:17142]                                                                                               |
| 383 | ENSG00000183323 | 2491.898706 | -1.429594935 | 0.074870608 | 1.38E-79 | CCDC125  | coiled-coil domain containing 125 [Source:HGNC Symbol;Acc:28924]                                                                        |
| 384 | ENSG00000104812 | 2307.842525 | -1.561719045 | 0.081956376 | 2.88E-79 | GYS1     | glycogen synthase 1 (muscle) [Source:HGNC Symbol;Acc:4706]                                                                              |
| 385 | ENSG00000096433 | 1088.848497 | 2.456738862  | 0.129069043 | 4.31E-79 | ITPR3    | inositol 1,4,5-trisphosphate receptor, type 3 [Source:HGNC Symbol;Acc:6182]                                                             |
| 386 | ENSG00000042493 | 3447.115987 | -1.495521587 | 0.078670946 | 6.86E-79 | CAPG     | capping protein (actin filament), gelsolin-like [Source:HGNC Symbol;Acc:1474]                                                           |

|     |                 |             |              |             |          |          |                                                                                           |
|-----|-----------------|-------------|--------------|-------------|----------|----------|-------------------------------------------------------------------------------------------|
| 387 | ENSG00000155307 | 1398.534832 | -1.814198883 | 0.095439215 | 6.95E-79 | SAMSN1   | SAM domain, SH3 domain and nuclear localization signals 1 [Source:HGNC Symbol;Acc:10528]  |
| 388 | ENSG00000115271 | 16609.54752 | -0.978579516 | 0.051517327 | 9.02E-79 | GCA      | grancalcin, EF-hand calcium binding protein [Source:HGNC Symbol;Acc:15990]                |
| 389 | ENSG00000111913 | 17419.43668 | 1.015636054  | 0.053490599 | 1.05E-78 | FAM65B   | family with sequence similarity 65, member B [Source:HGNC Symbol;Acc:13872]               |
| 390 | ENSG00000166527 | 1345.765325 | -1.788768317 | 0.094283995 | 1.39E-78 | CLEC4D   | C-type lectin domain family 4, member D [Source:HGNC Symbol;Acc:14554]                    |
| 391 | ENSG00000133063 | 1746.131736 | -1.67854436  | 0.088566303 | 2.02E-78 | CHIT1    | chitinase 1 (chitotriosidase) [Source:HGNC Symbol;Acc:1936]                               |
| 392 | ENSG00000000938 | 26618.98966 | -0.836290122 | 0.04416922  | 2.87E-78 | FGR      | feline Gardner-Rasheed sarcoma viral oncogene homolog [Source:HGNC Symbol;Acc:3697]       |
| 393 | ENSG00000128271 | 1034.182076 | -2.431393417 | 0.128662826 | 5.70E-78 | ADORA2A  | adenosine A2a receptor [Source:HGNC Symbol;Acc:263]                                       |
| 394 | ENSG00000161638 | 5540.300566 | 1.179479818  | 0.062558465 | 1.29E-77 | ITGA5    | integrin, alpha 5 (fibronectin receptor, alpha polypeptide) [Source:HGNC Symbol;Acc:6141] |
| 395 | ENSG00000133318 | 13086.17148 | -0.930260661 | 0.049361521 | 1.51E-77 | RTN3     | reticulon 3 [Source:HGNC Symbol;Acc:10469]                                                |
| 396 | ENSG00000262552 | 7179.790531 | -1.116366116 | 0.059242095 | 1.55E-77 | ALOX5    | arachidonate 5-lipoxygenase [Source:HGNC Symbol;Acc:435]                                  |
| 397 | ENSG00000085719 | 5385.286798 | -1.383713457 | 0.073472209 | 1.90E-77 | CPNE3    | copine III [Source:HGNC Symbol;Acc:2316]                                                  |
| 398 | ENSG00000157828 | 328.3097482 | 5.393614156  | 0.286686909 | 2.75E-77 | RPS4Y2   | ribosomal protein S4, Y-linked 2 [Source:HGNC Symbol;Acc:18501]                           |
| 399 | ENSG00000228299 | 70805.40213 | 0.938301792  | 0.049883462 | 2.94E-77 | HLA-C    | major histocompatibility complex, class I, C [Source:HGNC Symbol;Acc:4933]                |
| 400 | ENSG00000134243 | 3042.079902 | -1.306647227 | 0.069636653 | 6.99E-77 | SORT1    | sortilin 1 [Source:HGNC Symbol;Acc:11186]                                                 |
| 401 | ENSG00000008988 | 9848.60048  | 0.953152888  | 0.050821868 | 8.26E-77 | RPS20    | ribosomal protein S20 [Source:HGNC Symbol;Acc:10405]                                      |
| 402 | ENSG00000101347 | 3634.407083 | 1.290650044  | 0.068850759 | 9.79E-77 | SAMHD1   | SAM domain and HD domain 1 [Source:HGNC Symbol;Acc:15925]                                 |
| 403 | ENSG00000115828 | 4144.014705 | -1.377803548 | 0.073515567 | 1.05E-76 | QPCT     | glutaminyl-peptide cyclotransferase [Source:HGNC Symbol;Acc:9753]                         |
| 404 | ENSG00000143815 | 10051.92872 | -1.00962833  | 0.053940534 | 1.65E-76 | LBR      | lamin B receptor [Source:HGNC Symbol;Acc:6518]                                            |
| 405 | ENSG00000198176 | 2360.158589 | -1.460556759 | 0.07808391  | 2.08E-76 | TFDP1    | transcription factor Dp-1 [Source:HGNC Symbol;Acc:11749]                                  |
| 406 | ENSG00000150045 | 580.0003853 | 3.222398374  | 0.172430152 | 2.85E-76 | KLRF1    | killer cell lectin-like receptor subfamily F, member 1 [Source:HGNC Symbol;Acc:13342]     |
| 407 | ENSG00000067082 | 19853.65594 | -0.847969636 | 0.045405692 | 3.61E-76 | KLF6     | Kruppel-like factor 6 [Source:HGNC Symbol;Acc:2235]                                       |
| 408 | ENSG00000151689 | 969.6353221 | -2.092913689 | 0.112093849 | 3.90E-76 | INPP1    | inositol polyphosphate-1-phosphatase [Source:HGNC Symbol;Acc:6071]                        |
| 409 | ENSG00000267878 | 973.7599251 | 2.297044423  | 0.123061785 | 4.30E-76 | PIM2     | pim-2 oncogene [Source:HGNC Symbol;Acc:8987]                                              |
| 410 | ENSG00000214212 | 2848.790965 | -1.375764781 | 0.073764495 | 5.68E-76 | C19orf38 | chromosome 19 open reading frame 38 [Source:HGNC Symbol;Acc:34073]                        |
| 411 | ENSG00000163393 | 1890.681972 | -1.574816594 | 0.08446747  | 6.43E-76 | SLC22A15 | solute carrier family 22, member 15 [Source:HGNC Symbol;Acc:20301]                        |
| 412 | ENSG00000174444 | 20629.36302 | 0.837647151  | 0.044933076 | 6.65E-76 | RPL4     | ribosomal protein L4 [Source:HGNC Symbol;Acc:10353]                                       |
| 413 | ENSG00000102096 | 973.558052  | 2.297466849  | 0.123243842 | 6.69E-76 | PIM2     | pim-2 oncogene [Source:HGNC Symbol;Acc:8987]                                              |
| 414 | ENSG00000113140 | 602.893046  | 2.74718147   | 0.147395668 | 7.12E-76 | SPARC    | secreted protein, acidic, cysteine-rich (osteonectin) [Source:HGNC Symbol;Acc:11219]      |

|     |                 |             |              |             |          |              |                                                                                                                                                 |
|-----|-----------------|-------------|--------------|-------------|----------|--------------|-------------------------------------------------------------------------------------------------------------------------------------------------|
| 415 | ENSG00000065618 | 1512.462493 | -1.937499422 | 0.104047792 | 9.75E-76 | COL17A1      | collagen, type XVII, alpha 1 [Source:HGNC Symbol;Acc:2194]                                                                                      |
| 416 | ENSG00000172116 | 613.2409235 | 2.844006147  | 0.152978469 | 1.71E-75 | CD8B         | CD8b molecule [Source:HGNC Symbol;Acc:1707]                                                                                                     |
| 417 | ENSG00000013725 | 1440.213119 | 1.968615162  | 0.106135801 | 3.79E-75 | CD6          | CD6 molecule [Source:HGNC Symbol;Acc:1691]                                                                                                      |
| 418 | ENSG00000157303 | 1985.222333 | -1.698980676 | 0.091740875 | 6.46E-75 | SUSD3        | sushi domain containing 3 [Source:HGNC Symbol;Acc:28391]                                                                                        |
| 419 | ENSG00000145425 | 23200.57758 | 0.956864189  | 0.051671045 | 6.56E-75 | RPS3A        | ribosomal protein S3A [Source:HGNC Symbol;Acc:10421]                                                                                            |
| 420 | ENSG00000133321 | 751.5625382 | 2.604821536  | 0.140735422 | 7.84E-75 | RARRES3      | retinoic acid receptor responder (tazarotene induced) 3 [Source:HGNC Symbol;Acc:9869]                                                           |
| 421 | ENSG00000180096 | 972.4672216 | 2.27993073   | 0.123183527 | 7.85E-75 | SEPT1        | septin 1 [Source:HGNC Symbol;Acc:2879]                                                                                                          |
| 422 | ENSG00000223980 | 26559.96928 | 0.927905043  | 0.050194506 | 1.18E-74 | HLA-A        | major histocompatibility complex, class I, A [Source:HGNC Symbol;Acc:4931]                                                                      |
| 423 | ENSG00000254838 | 1691.302462 | 1.711973282  | 0.092750571 | 2.00E-74 | GVINP1       | GTPase, very large interferon inducible pseudogene 1 [Source:HGNC Symbol;Acc:25813]                                                             |
| 424 | ENSG00000188897 | 1329.104843 | 2.229876919  | 0.121080997 | 4.28E-74 | CTD-3088G3.8 | Protein LOC388210 [Source:UniProtKB/TrEMBL;Acc:13L099]                                                                                          |
| 425 | ENSG00000119922 | 2159.93259  | 1.639670196  | 0.089084629 | 5.20E-74 | IFIT2        | interferon-induced protein with tetratricopeptide repeats 2 [Source:HGNC Symbol;Acc:5409]                                                       |
| 426 | ENSG00000108298 | 14549.33148 | 1.179745577  | 0.064116028 | 5.75E-74 | RPL19        | ribosomal protein L19 [Source:HGNC Symbol;Acc:10312]                                                                                            |
| 427 | ENSG00000072818 | 7325.180228 | -0.987691525 | 0.053694493 | 6.35E-74 | ACAP1        | ArfGAP with coiled-coil, ankyrin repeat and PH domains 1 [Source:HGNC Symbol;Acc:16467]                                                         |
| 428 | ENSG00000134954 | 7658.500417 | 1.0676352    | 0.058053602 | 6.84E-74 | ETS1         | v-ets avian erythroblastosis virus E26 oncogene homolog 1 [Source:HGNC Symbol;Acc:3488]                                                         |
| 429 | ENSG00000128016 | 10535.20695 | -1.153331507 | 0.062884014 | 1.71E-73 | ZFP36        | ZFP36 ring finger protein [Source:HGNC Symbol;Acc:12862]                                                                                        |
| 430 | ENSG00000175928 | 479.9294243 | -2.976996209 | 0.162349584 | 1.83E-73 | LRRN1        | leucine rich repeat neuronal 1 [Source:HGNC Symbol;Acc:20980]                                                                                   |
| 431 | ENSG00000186652 | 287.8347216 | -4.473126352 | 0.244556913 | 4.26E-73 | PRG2         | proteoglycan 2, bone marrow (natural killer cell activator, eosinophil granule major basic protein) [Source:HGNC Symbol;Acc:9362]               |
| 432 | ENSG00000166349 | 454.4772237 | 3.462584801  | 0.189404804 | 5.04E-73 | RAG1         | recombination activating gene 1 [Source:HGNC Symbol;Acc:9831]                                                                                   |
| 433 | ENSG00000197601 | 5899.278094 | -1.121309276 | 0.061337131 | 5.06E-73 | FAR1         | fatty acyl CoA reductase 1 [Source:HGNC Symbol;Acc:26222]                                                                                       |
| 434 | ENSG00000164054 | 4011.367951 | 1.387386574  | 0.075921785 | 5.76E-73 | SHISA5       | shisa family member 5 [Source:HGNC Symbol;Acc:30376]                                                                                            |
| 435 | ENSG00000122224 | 789.9931627 | 2.455030107  | 0.134500548 | 8.44E-73 | LY9          | lymphocyte antigen 9 [Source:HGNC Symbol;Acc:6730]                                                                                              |
| 436 | ENSG00000117091 | 3234.021992 | 1.303310969  | 0.071413643 | 8.85E-73 | CD48         | CD48 molecule [Source:HGNC Symbol;Acc:1683]                                                                                                     |
| 437 | ENSG00000196189 | 5043.281195 | -1.118874404 | 0.061315694 | 9.23E-73 | SEMA4A       | sema domain, immunoglobulin domain (Ig), transmembrane domain (TM) and short cytoplasmic domain, (semaphorin) 4A [Source:HGNC Symbol;Acc:10729] |
| 438 | ENSG00000105372 | 3752.683255 | 1.268503345  | 0.0695415   | 1.04E-72 | RPS19        | ribosomal protein S19 [Source:HGNC Symbol;Acc:10402]                                                                                            |
| 439 | ENSG00000127528 | 3988.397881 | 1.577898091  | 0.086553483 | 1.26E-72 | KLF2         | Kruppel-like factor 2 [Source:HGNC Symbol;Acc:6347]                                                                                             |
| 440 | ENSG00000012779 | 7901.33109  | -1.081913031 | 0.059349066 | 1.28E-72 | ALOX5        | arachidonate 5-lipoxygenase [Source:HGNC Symbol;Acc:435]                                                                                        |
| 441 | ENSG00000142937 | 12898.08845 | 0.937567475  | 0.051464969 | 1.59E-72 | RPS8         | ribosomal protein S8 [Source:HGNC Symbol;Acc:10441]                                                                                             |
| 442 | ENSG00000140379 | 3350.896571 | -1.262770072 | 0.069332366 | 1.71E-72 | BCL2A1       | BCL2-related protein A1 [Source:HGNC Symbol;Acc:991]                                                                                            |

|     |                 |             |              |             |          |          |                                                                                                    |
|-----|-----------------|-------------|--------------|-------------|----------|----------|----------------------------------------------------------------------------------------------------|
| 443 | ENSG00000262806 | 814.2112333 | -2.418345018 | 0.133099219 | 3.80E-72 | FCAR     | Fc fragment of IgA, receptor for [Source:HGNC Symbol;Acc:3608]                                     |
| 444 | ENSG00000272852 | 3714.011481 | 1.269526633  | 0.069881795 | 3.99E-72 | RPS19    | ribosomal protein S19 [Source:HGNC Symbol;Acc:10402]                                               |
| 445 | ENSG00000113916 | 19651.80121 | -0.790574339 | 0.043527133 | 4.28E-72 | BCL6     | B-cell CLL/lymphoma 6 [Source:HGNC Symbol;Acc:1001]                                                |
| 446 | ENSG00000066027 | 6278.710909 | -1.077574187 | 0.059335161 | 4.43E-72 | PPP2R5A  | protein phosphatase 2, regulatory subunit B', alpha [Source:HGNC Symbol;Acc:9309]                  |
| 447 | ENSG00000101445 | 737.4523122 | 2.490320796  | 0.137572102 | 1.29E-71 | PPP1R16B | protein phosphatase 1, regulatory subunit 16B [Source:HGNC Symbol;Acc:15850]                       |
| 448 | ENSG00000124614 | 7127.017934 | 1.128873335  | 0.062414174 | 1.69E-71 | RPS10    | ribosomal protein S10 [Source:HGNC Symbol;Acc:10383]                                               |
| 449 | ENSG00000055163 | 8709.242912 | -0.95170425  | 0.052659619 | 2.18E-71 | CYFIP2   | cytoplasmic FMR1 interacting protein 2 [Source:HGNC Symbol;Acc:13760]                              |
| 450 | ENSG00000023445 | 1509.308809 | 1.909148411  | 0.105735343 | 2.95E-71 | BIRC3    | baculoviral IAP repeat containing 3 [Source:HGNC Symbol;Acc:591]                                   |
| 451 | ENSG00000187109 | 4784.945666 | 1.168278122  | 0.064729163 | 3.35E-71 | NAP1L1   | nucleosome assembly protein 1-like 1 [Source:HGNC Symbol;Acc:7637]                                 |
| 452 | ENSG00000167815 | 982.7148542 | -1.979872913 | 0.109993351 | 8.08E-71 | PRDX2    | peroxiredoxin 2 [Source:HGNC Symbol;Acc:9353]                                                      |
| 453 | ENSG00000108984 | 556.6083601 | -2.585064297 | 0.143726306 | 1.04E-70 | MAP2K6   | mitogen-activated protein kinase kinase 6 [Source:HGNC Symbol;Acc:6846]                            |
| 454 | ENSG00000123700 | 696.0937488 | 2.849038362  | 0.158479664 | 1.21E-70 | KCNJ2    | potassium inwardly-rectifying channel, subfamily J, member 2 [Source:HGNC Symbol;Acc:6263]         |
| 455 | ENSG00000101084 | 4366.912107 | -1.18707907  | 0.06607522  | 1.49E-70 | C20orf24 | chromosome 20 open reading frame 24 [Source:HGNC Symbol;Acc:15870]                                 |
| 456 | ENSG00000101162 | 588.8467152 | 2.942332061  | 0.164011938 | 2.36E-70 | TUBB1    | tubulin, beta 1 class VI [Source:HGNC Symbol;Acc:16257]                                            |
| 457 | ENSG00000010610 | 1626.782764 | 1.679833873  | 0.093637687 | 2.36E-70 | CD4      | CD4 molecule [Source:HGNC Symbol;Acc:1678]                                                         |
| 458 | ENSG00000268779 | 1626.642457 | 1.677793744  | 0.093605891 | 3.13E-70 | CD4      | CD4 molecule [Source:HGNC Symbol;Acc:1678]                                                         |
| 459 | ENSG00000158869 | 6867.310104 | -1.065428186 | 0.059456824 | 3.40E-70 | FCER1G   | Fc fragment of IgE, high affinity I, receptor for; gamma polypeptide [Source:HGNC Symbol;Acc:3611] |
| 460 | ENSG00000138246 | 2742.160497 | -1.378197764 | 0.077086529 | 7.05E-70 | DNAJC13  | DnaJ (Hsp40) homolog, subfamily C, member 13 [Source:HGNC Symbol;Acc:30343]                        |
| 461 | ENSG00000251322 | 290.625187  | 4.717795765  | 0.264217372 | 1.06E-69 | SHANK3   | SH3 and multiple ankyrin repeat domains 3 [Source:HGNC Symbol;Acc:14294]                           |
| 462 | ENSG00000181104 | 633.5481916 | 2.723757076  | 0.152837452 | 1.96E-69 | F2R      | coagulation factor II (thrombin) receptor [Source:HGNC Symbol;Acc:3537]                            |
| 463 | ENSG00000183696 | 2048.624802 | -1.510135886 | 0.084838718 | 2.85E-69 | UPP1     | uridine phosphorylase 1 [Source:HGNC Symbol;Acc:12576]                                             |
| 464 | ENSG00000102007 | 3064.187765 | -1.238742571 | 0.069651752 | 3.74E-69 | PLP2     | proteolipid protein 2 (colonic epithelium-enriched) [Source:HGNC Symbol;Acc:9087]                  |
| 465 | ENSG00000123416 | 9438.624153 | -0.871888494 | 0.049049713 | 4.40E-69 | TUBA1B   | tubulin, alpha 1b [Source:HGNC Symbol;Acc:18809]                                                   |
| 466 | ENSG00000163545 | 2008.565083 | 1.59638784   | 0.089812526 | 4.46E-69 | NUAK2    | NUAK family, SNF1-like kinase, 2 [Source:HGNC Symbol;Acc:29558]                                    |
| 467 | ENSG00000269034 | 3063.926067 | -1.238102176 | 0.069668699 | 4.73E-69 | PLP2     | proteolipid protein 2 (colonic epithelium-enriched) [Source:HGNC Symbol;Acc:9087]                  |
| 468 | ENSG00000178075 | 647.9086754 | 3.301109886  | 0.186110318 | 8.63E-69 | GRAMD1C  | GRAM domain containing 1C [Source:HGNC Symbol;Acc:25252]                                           |
| 469 | ENSG00000197852 | 4713.386103 | 1.252898647  | 0.070668405 | 9.95E-69 | FAM212B  | family with sequence similarity 212, member B [Source:HGNC Symbol;Acc:28045]                       |
| 470 | ENSG00000022267 | 360.7742619 | 3.49204504   | 0.197052277 | 1.14E-68 | FHL1     | four and a half LIM domains 1 [Source:HGNC Symbol;Acc:3702]                                        |

|     |                 |             |              |             |          |          |                                                                                                         |
|-----|-----------------|-------------|--------------|-------------|----------|----------|---------------------------------------------------------------------------------------------------------|
| 471 | ENSG00000148773 | 2013.903067 | -2.063355355 | 0.116548857 | 1.56E-68 | MKI67    | marker of proliferation Ki-67 [Source:HGNC Symbol;Acc:7107]                                             |
| 472 | ENSG00000196358 | 2062.971028 | -1.892678742 | 0.107038386 | 2.28E-68 | NTNG2    | netrin G2 [Source:HGNC Symbol;Acc:14288]                                                                |
| 473 | ENSG00000104687 | 2167.018423 | -1.404528877 | 0.079442057 | 2.37E-68 | GSR      | glutathione reductase [Source:HGNC Symbol;Acc:4623]                                                     |
| 474 | ENSG00000100219 | 2384.112241 | 1.408163634  | 0.07965506  | 2.43E-68 | XBP1     | X-box binding protein 1 [Source:HGNC Symbol;Acc:12801]                                                  |
| 475 | ENSG00000163947 | 1226.031409 | 1.844663524  | 0.10443475  | 3.17E-68 | ARHGGEF3 | Rho guanine nucleotide exchange factor (GEF) 3 [Source:HGNC Symbol;Acc:683]                             |
| 476 | ENSG0000013306  | 1840.227196 | 1.826698957  | 0.103423283 | 3.21E-68 | SLC25A39 | solute carrier family 25, member 39 [Source:HGNC Symbol;Acc:24279]                                      |
| 477 | ENSG00000129277 | 554.0237611 | 3.214075279  | 0.182250323 | 5.16E-68 | CCL4     | chemokine (C-C motif) ligand 4 [Source:HGNC Symbol;Acc:10630]                                           |
| 478 | ENSG00000197632 | 291.2356668 | -4.150374502 | 0.235419525 | 5.71E-68 | SERPINB2 | serpin peptidase inhibitor, clade B (ovalbumin), member 2 [Source:HGNC Symbol;Acc:8584]                 |
| 479 | ENSG00000106003 | 883.5112395 | 2.485677809  | 0.141121124 | 7.54E-68 | LFNG     | LFNG O-fucosylpeptide 3-beta-N-acetylglucosaminyltransferase [Source:HGNC Symbol;Acc:6560]              |
| 480 | ENSG00000160271 | 1314.528029 | 2.082654773  | 0.118406719 | 1.17E-67 | RALGDS   | ral guanine nucleotide dissociation stimulator [Source:HGNC Symbol;Acc:9842]                            |
| 481 | ENSG00000111335 | 1082.032405 | 1.954247569  | 0.111115897 | 1.20E-67 | OAS2     | 2'-5'-oligoadenylate synthetase 2, 69/71kDa [Source:HGNC Symbol;Acc:8087]                               |
| 482 | ENSG00000171863 | 9484.645796 | 0.917114672  | 0.052223047 | 1.89E-67 | RPS7     | ribosomal protein S7 [Source:HGNC Symbol;Acc:10440]                                                     |
| 483 | ENSG00000112053 | 1060.623421 | -2.037825146 | 0.116138764 | 2.45E-67 | SLC26A8  | solute carrier family 26 (anion exchanger), member 8 [Source:HGNC Symbol;Acc:14468]                     |
| 484 | ENSG00000156738 | 1570.710665 | 1.705639326  | 0.097347951 | 3.83E-67 | MS4A1    | membrane-spanning 4-domains, subfamily A, member 1 [Source:HGNC Symbol;Acc:7315]                        |
| 485 | ENSG00000124588 | 2543.575848 | -1.338462089 | 0.076403752 | 4.01E-67 | NQO2     | NAD(P)H dehydrogenase, quinone 2 [Source:HGNC Symbol;Acc:7856]                                          |
| 486 | ENSG00000063177 | 5747.353904 | 1.133360113  | 0.064735663 | 4.84E-67 | RPL18    | ribosomal protein L18 [Source:HGNC Symbol;Acc:10310]                                                    |
| 487 | ENSG00000143878 | 8160.827852 | 0.915921894  | 0.052339924 | 5.56E-67 | RHOB     | ras homolog family member B [Source:HGNC Symbol;Acc:668]                                                |
| 488 | ENSG00000134905 | 2653.265514 | -1.252538513 | 0.071645342 | 7.47E-67 | CARS2    | cysteinyl-tRNA synthetase 2, mitochondrial (putative) [Source:HGNC Symbol;Acc:25695]                    |
| 489 | ENSG00000179869 | 4080.91304  | -1.411443222 | 0.080773931 | 8.65E-67 | ABCA13   | ATP-binding cassette, sub-family A (ABC1), member 13 [Source:HGNC Symbol;Acc:14638]                     |
| 490 | ENSG00000107281 | 319.7520482 | 4.598402274  | 0.263779239 | 1.78E-66 | NPDC1    | neural proliferation, differentiation and control, 1 [Source:HGNC Symbol;Acc:7899]                      |
| 491 | ENSG00000072110 | 11369.55494 | -0.934031586 | 0.053586056 | 1.85E-66 | ACTN1    | actinin, alpha 1 [Source:HGNC Symbol;Acc:163]                                                           |
| 492 | ENSG00000109475 | 7865.401513 | 1.023689324  | 0.058736058 | 1.90E-66 | RPL34    | ribosomal protein L34 [Source:HGNC Symbol;Acc:10340]                                                    |
| 493 | ENSG00000143226 | 14972.03099 | 0.896873364  | 0.051640752 | 5.52E-66 | FCGR2A   | Fc fragment of IgG, low affinity IIa, receptor (CD32) [Source:HGNC Symbol;Acc:3616]                     |
| 494 | ENSG00000101096 | 1034.205866 | 2.311023222  | 0.133079269 | 5.68E-66 | NFATC2   | nuclear factor of activated T-cells, cytoplasmic, calcineurin-dependent 2 [Source:HGNC Symbol;Acc:7776] |
| 495 | ENSG00000136867 | 821.3128353 | 2.406283101  | 0.138869858 | 1.10E-65 | SLC31A2  | solute carrier family 31 (copper transporter), member 2 [Source:HGNC Symbol;Acc:11017]                  |
| 496 | ENSG00000206172 | 41928.33699 | 3.703434333  | 0.213798138 | 1.21E-65 | HBA1     | hemoglobin, alpha 1 [Source:HGNC Symbol;Acc:4823]                                                       |
| 497 | ENSG00000133317 | 904.9845538 | -2.071616572 | 0.119623256 | 1.30E-65 | LGALS12  | lectin, galactoside-binding, soluble, 12 [Source:HGNC Symbol;Acc:15788]                                 |
| 498 | ENSG00000169508 | 583.8183344 | 2.898048874  | 0.167643224 | 2.21E-65 | GPR183   | G protein-coupled receptor 183 [Source:HGNC Symbol;Acc:3128]                                            |



|     |                 |             |              |             |          |               |                                                                                                 |
|-----|-----------------|-------------|--------------|-------------|----------|---------------|-------------------------------------------------------------------------------------------------|
| 499 | ENSG00000134242 | 3111.51415  | -1.386363684 | 0.080295681 | 3.20E-65 | PTPN22        | protein tyrosine phosphatase, non-receptor type 22 (lymphoid) [Source:HGNC Symbol;Acc:9652]     |
| 500 | ENSG00000117724 | 716.8358121 | -2.332334378 | 0.135137999 | 3.59E-65 | CENPF         | centromere protein F, 350/400kDa [Source:HGNC Symbol;Acc:1857]                                  |
| 501 | ENSG00000025039 | 1692.778924 | -1.604255831 | 0.093063892 | 5.12E-65 | RRAGD         | Ras-related GTP binding D [Source:HGNC Symbol;Acc:19903]                                        |
| 502 | ENSG00000131747 | 907.8610765 | -2.57975597  | 0.14988693  | 8.14E-65 | TOP2A         | topoisomerase (DNA) II alpha 170kDa [Source:HGNC Symbol;Acc:11989]                              |
| 503 | ENSG00000083845 | 4442.712276 | 1.282235441  | 0.074539105 | 9.51E-65 | RPS5          | ribosomal protein S5 [Source:HGNC Symbol;Acc:10426]                                             |
| 504 | ENSG00000220842 | 10931.39535 | 0.914382316  | 0.053170391 | 1.03E-64 | RP11-572P18.1 |                                                                                                 |
| 505 | ENSG00000138678 | 1618.946424 | -1.671039149 | 0.097287463 | 1.48E-64 | AGPAT9        | 1-acylglycerol-3-phosphate O-acyltransferase 9 [Source:HGNC Symbol;Acc:28157]                   |
| 506 | ENSG00000213402 | 676.3161716 | 2.878439865  | 0.167658987 | 1.69E-64 | PTPRCAP       | protein tyrosine phosphatase, receptor type, C-associated protein [Source:HGNC Symbol;Acc:9667] |
| 507 | ENSG00000148180 | 8434.510783 | -1.21182081  | 0.070633929 | 2.08E-64 | GSN           | gelsolin [Source:HGNC Symbol;Acc:4620]                                                          |
| 508 | ENSG00000120265 | 2541.817736 | -1.253854038 | 0.073229946 | 3.74E-64 | PCMT1         | protein-L-isoaspartate (D-aspartate) O-methyltransferase [Source:HGNC Symbol;Acc:8728]          |
| 509 | ENSG00000100330 | 7134.796463 | -1.120840237 | 0.06547765  | 4.01E-64 | MTMR3         | myotubularin related protein 3 [Source:HGNC Symbol;Acc:7451]                                    |
| 510 | ENSG00000188933 | 2522.680681 | -1.313337756 | 0.076761707 | 4.64E-64 | USP32P1       | ubiquitin specific peptidase 32 pseudogene 1 [Source:HGNC Symbol;Acc:43570]                     |
| 511 | ENSG00000174718 | 14788.5989  | 0.922175046  | 0.053934463 | 5.62E-64 | KIAA1551      | KIAA1551 [Source:HGNC Symbol;Acc:25559]                                                         |
| 512 | ENSG00000121064 | 2672.846123 | -1.245919424 | 0.072891183 | 6.13E-64 | SCPEP1        | serine carboxypeptidase 1 [Source:HGNC Symbol;Acc:29507]                                        |
| 513 | ENSG00000160856 | 1194.461284 | 2.170491748  | 0.127157462 | 9.16E-64 | FCRL3         | Fc receptor-like 3 [Source:HGNC Symbol;Acc:18506]                                               |
| 514 | ENSG00000121552 | 3920.901312 | -1.139105774 | 0.066762002 | 1.03E-63 | CSTA          | cystatin A (stefin A) [Source:HGNC Symbol;Acc:2481]                                             |
| 515 | ENSG00000100351 | 726.0364915 | 2.538991293  | 0.148830501 | 1.08E-63 | GRAP2         | GRB2-related adaptor protein 2 [Source:HGNC Symbol;Acc:4563]                                    |
| 516 | ENSG00000089902 | 3650.528712 | -1.207956815 | 0.070830184 | 1.18E-63 | RCOR1         | REST corepressor 1 [Source:HGNC Symbol;Acc:17441]                                               |
| 517 | ENSG00000127951 | 11916.57353 | 0.98089439   | 0.057523335 | 1.22E-63 | FGL2          | fibrinogen-like 2 [Source:HGNC Symbol;Acc:3696]                                                 |
| 518 | ENSG00000185909 | 693.9340982 | 2.623545208  | 0.153864241 | 1.24E-63 | KLHDC8B       | kelch domain containing 8B [Source:HGNC Symbol;Acc:28557]                                       |
| 519 | ENSG00000148175 | 7435.769338 | -0.889272181 | 0.05218004  | 1.44E-63 | STOM          | stomatin [Source:HGNC Symbol;Acc:3383]                                                          |
| 520 | ENSG00000167996 | 47828.62427 | 0.791682817  | 0.046460439 | 1.49E-63 | FTH1          | ferritin, heavy polypeptide 1 [Source:HGNC Symbol;Acc:3976]                                     |
| 521 | ENSG00000082212 | 2412.785864 | -1.384770024 | 0.081383621 | 2.27E-63 | ME2           | malic enzyme 2, NAD(+)-dependent, mitochondrial [Source:HGNC Symbol;Acc:6984]                   |
| 522 | ENSG00000163682 | 9863.242731 | 0.954725095  | 0.056159652 | 2.93E-63 | RPL9          | ribosomal protein L9 [Source:HGNC Symbol;Acc:10369]                                             |
| 523 | ENSG00000255587 | 1104.312268 | -2.028286765 | 0.11939624  | 3.61E-63 | RAB44         | RAB44, member RAS oncogene family [Source:HGNC Symbol;Acc:21068]                                |
| 524 | ENSG00000186468 | 11039.64958 | 0.90969057   | 0.053578736 | 4.23E-63 | RPS23         | ribosomal protein S23 [Source:HGNC Symbol;Acc:10410]                                            |
| 525 | ENSG00000143119 | 9856.467363 | 0.927830867  | 0.054663494 | 4.60E-63 | CD53          | CD53 molecule [Source:HGNC Symbol;Acc:1686]                                                     |
| 526 | ENSG00000138293 | 9000.304975 | 1.016064246  | 0.059864287 | 4.65E-63 | NCOA4         | nuclear receptor coactivator 4 [Source:HGNC Symbol;Acc:7671]                                    |

|     |                 |             |              |             |          |             |                                                                                      |
|-----|-----------------|-------------|--------------|-------------|----------|-------------|--------------------------------------------------------------------------------------|
| 527 | ENSG00000137804 | 797.3557449 | -2.1283413   | 0.125405512 | 4.73E-63 | NUSAP1      | nucleolar and spindle associated protein 1 [Source:HGNC Symbol;Acc:18538]            |
| 528 | ENSG00000266412 | 9000.394989 | 1.016006596  | 0.059894674 | 5.45E-63 | NCOA4       | nuclear receptor coactivator 4 [Source:HGNC Symbol;Acc:7671]                         |
| 529 | ENSG00000162909 | 2249.087598 | 1.533435973  | 0.090456724 | 6.56E-63 | CAPN2       | calpain 2, (m/II) large subunit [Source:HGNC Symbol;Acc:1479]                        |
| 530 | ENSG00000273482 | 4867.939877 | -0.993487206 | 0.058645226 | 7.97E-63 | PRKCD       | protein kinase C, delta [Source:HGNC Symbol;Acc:9399]                                |
| 531 | ENSG00000135709 | 4294.386105 | -1.282305572 | 0.075708505 | 8.40E-63 | KIAA0513    | KIAA0513 [Source:HGNC Symbol;Acc:29058]                                              |
| 532 | ENSG00000163932 | 4867.854998 | -0.992794542 | 0.058661747 | 1.05E-62 | PRKCD       | protein kinase C, delta [Source:HGNC Symbol;Acc:9399]                                |
| 533 | ENSG00000168028 | 11095.20373 | 0.85389185   | 0.050461074 | 1.09E-62 | RPSA        | ribosomal protein SA [Source:HGNC Symbol;Acc:6502]                                   |
| 534 | ENSG00000178726 | 523.6434406 | 3.374643369  | 0.199466193 | 1.15E-62 | THBD        | thrombomodulin [Source:HGNC Symbol;Acc:11784]                                        |
| 535 | ENSG00000145287 | 3999.716158 | -1.073201044 | 0.063531762 | 1.79E-62 | PLAC8       | placenta-specific 8 [Source:HGNC Symbol;Acc:19254]                                   |
| 536 | ENSG00000177600 | 7645.574296 | 1.006336057  | 0.059636136 | 2.42E-62 | RPLP2       | ribosomal protein, large, P2 [Source:HGNC Symbol;Acc:10377]                          |
| 537 | ENSG00000186854 | 812.3878814 | 2.321581601  | 0.137769762 | 3.58E-62 | TRABD2A     | TraB domain containing 2A [Source:HGNC Symbol;Acc:27013]                             |
| 538 | ENSG00000236693 | 407.989256  | 3.123954567  | 0.185527594 | 4.45E-62 | HLA-DPB1    | major histocompatibility complex, class II, DP beta 1 [Source:HGNC Symbol;Acc:4940]  |
| 539 | ENSG00000230763 | 407.5363521 | 3.121144107  | 0.185403638 | 4.75E-62 | HLA-DPB1    | major histocompatibility complex, class II, DP beta 1 [Source:HGNC Symbol;Acc:4940]  |
| 540 | ENSG00000148110 | 3180.338429 | -1.287293708 | 0.076517286 | 5.68E-62 | HIATL1      | hippocampus abundant transcript-like 1 [Source:HGNC Symbol;Acc:23376]                |
| 541 | ENSG00000075651 | 853.5865508 | -1.945241562 | 0.115736937 | 7.45E-62 | PLD1        | phospholipase D1, phosphatidylcholine-specific [Source:HGNC Symbol;Acc:9067]         |
| 542 | ENSG00000088325 | 637.0671193 | -2.266629588 | 0.134944072 | 8.89E-62 | TPX2        | TPX2, microtubule-associated [Source:HGNC Symbol;Acc:1249]                           |
| 543 | ENSG00000125740 | 1265.686181 | -1.58346672  | 0.094423969 | 1.40E-61 | FOSB        | FBJ murine osteosarcoma viral oncogene homolog B [Source:HGNC Symbol;Acc:3797]       |
| 544 | ENSG00000070540 | 2261.74377  | -1.287160101 | 0.07677117  | 1.48E-61 | WIPI1       | WD repeat domain, phosphoinositide interacting 1 [Source:HGNC Symbol;Acc:25471]      |
| 545 | ENSG00000135318 | 271.4196682 | 4.792538548  | 0.285934659 | 1.62E-61 | NT5E        | 5'-nucleotidase, ecto (CD73) [Source:HGNC Symbol;Acc:8021]                           |
| 546 | ENSG00000068650 | 3355.455772 | -1.352579825 | 0.080734169 | 1.83E-61 | ATP11A      | ATPase, class VI, type 11A [Source:HGNC Symbol;Acc:13552]                            |
| 547 | ENSG00000135929 | 1975.713085 | 1.531222901  | 0.091597237 | 3.38E-61 | CYP27A1     | cytochrome P450, family 27, subfamily A, polypeptide 1 [Source:HGNC Symbol;Acc:2605] |
| 548 | ENSG00000167434 | 769.8325838 | -2.036114834 | 0.121807543 | 3.43E-61 | CA4         | carbonic anhydrase IV [Source:HGNC Symbol;Acc:1375]                                  |
| 549 | ENSG00000255819 | 433.1078619 | 3.377969347  | 0.202540109 | 6.46E-61 | KLRC4-KLRK1 | KLRC4-KLRK1 readthrough [Source:HGNC Symbol;Acc:48357]                               |
| 550 | ENSG00000205413 | 2390.606252 | 1.383393395  | 0.082994406 | 7.56E-61 | SAMD9       | sterile alpha motif domain containing 9 [Source:HGNC Symbol;Acc:1348]                |
| 551 | ENSG00000213918 | 2061.67176  | -1.319064703 | 0.07916678  | 8.43E-61 | DNASE1      | deoxyribonuclease I [Source:HGNC Symbol;Acc:2956]                                    |
| 552 | ENSG00000100055 | 6328.646081 | 1.284756534  | 0.077164178 | 1.03E-60 | CYTH4       | cytohesin 4 [Source:HGNC Symbol;Acc:9505]                                            |
| 553 | ENSG00000163563 | 46816.8287  | -0.751101245 | 0.04512788  | 1.14E-60 | MNDA        | myeloid cell nuclear differentiation antigen [Source:HGNC Symbol;Acc:7183]           |
| 554 | ENSG00000137154 | 21370.90811 | 0.83131131   | 0.050020986 | 1.71E-60 | RPS6        | ribosomal protein S6 [Source:HGNC Symbol;Acc:10429]                                  |

|     |                 |             |              |             |          |           |                                                                                        |
|-----|-----------------|-------------|--------------|-------------|----------|-----------|----------------------------------------------------------------------------------------|
| 555 | ENSG00000006534 | 2311.605362 | -1.312514244 | 0.079051854 | 2.23E-60 | ALDH3B1   | aldehyde dehydrogenase 3 family, member B1 [Source:HGNC Symbol;Acc:410]                |
| 556 | ENSG00000162231 | 7961.424753 | -0.979094502 | 0.058980874 | 2.34E-60 | NXF1      | nuclear RNA export factor 1 [Source:HGNC Symbol;Acc:8071]                              |
| 557 | ENSG00000225119 | 4153.381148 | -1.154028426 | 0.06954016  | 2.54E-60 | LINC00999 | long intergenic non-protein coding RNA 999 [Source:HGNC Symbol;Acc:38537]              |
| 558 | ENSG00000071082 | 9784.863892 | 0.939394572  | 0.056623381 | 2.75E-60 | RPL31     | ribosomal protein L31 [Source:HGNC Symbol;Acc:10334]                                   |
| 559 | ENSG00000105193 | 7386.219289 | 1.11938072   | 0.067481562 | 2.85E-60 | RPS16     | ribosomal protein S16 [Source:HGNC Symbol;Acc:10396]                                   |
| 560 | ENSG00000124731 | 3050.147969 | 1.317545102  | 0.07952176  | 3.94E-60 | TREM1     | triggering receptor expressed on myeloid cells 1 [Source:HGNC Symbol;Acc:17760]        |
| 561 | ENSG00000072954 | 412.8568682 | -2.806614828 | 0.169527442 | 4.87E-60 | TMEM38A   | transmembrane protein 38A [Source:HGNC Symbol;Acc:28462]                               |
| 562 | ENSG00000177054 | 1455.347968 | -1.570454646 | 0.094980448 | 6.90E-60 | ZDHC13    | zinc finger, DHHC-type containing 13 [Source:HGNC Symbol;Acc:18413]                    |
| 563 | ENSG00000185697 | 984.7286972 | 1.998349043  | 0.120973475 | 8.92E-60 | MYBL1     | v-myb avian myeloblastosis viral oncogene homolog-like 1 [Source:HGNC Symbol;Acc:7547] |
| 564 | ENSG00000128335 | 2253.239835 | 1.356088627  | 0.08211464  | 9.56E-60 | APOL2     | apolipoprotein L, 2 [Source:HGNC Symbol;Acc:619]                                       |
| 565 | ENSG00000122861 | 650.6514361 | -2.1776087   | 0.131921135 | 1.08E-59 | PLAU      | plasminogen activator, urokinase [Source:HGNC Symbol;Acc:9052]                         |
| 566 | ENSG00000183856 | 753.9409232 | -2.252494344 | 0.13656006  | 1.33E-59 | IQGAP3    | IQ motif containing GTPase activating protein 3 [Source:HGNC Symbol;Acc:20669]         |
| 567 | ENSG00000271019 | 2847.008367 | 1.37061008   | 0.083208673 | 1.93E-59 | MBOAT7    | membrane bound O-acyltransferase domain containing 7 [Source:HGNC Symbol;Acc:15505]    |
| 568 | ENSG00000150687 | 729.638663  | 2.160415963  | 0.131352442 | 2.88E-59 | PRSS23    | protease, serine, 23 [Source:HGNC Symbol;Acc:14370]                                    |
| 569 | ENSG00000056558 | 1139.384716 | 1.756997414  | 0.106923517 | 3.70E-59 | TRAF1     | TNF receptor-associated factor 1 [Source:HGNC Symbol;Acc:12031]                        |
| 570 | ENSG00000118181 | 4970.316895 | 1.053562295  | 0.064133642 | 3.98E-59 | RPS25     | ribosomal protein S25 [Source:HGNC Symbol;Acc:10413]                                   |
| 571 | ENSG00000185989 | 2389.652148 | 1.37024575   | 0.083420043 | 4.09E-59 | RASA3     | RAS p21 protein activator 3 [Source:HGNC Symbol;Acc:20331]                             |
| 572 | ENSG00000163564 | 648.3808613 | 2.439601723  | 0.148577385 | 4.52E-59 | PYHIN1    | pyrin and HIN domain family, member 1 [Source:HGNC Symbol;Acc:28894]                   |
| 573 | ENSG00000113282 | 3381.836344 | -1.094865948 | 0.066714253 | 5.19E-59 | CLINT1    | clathrin interactor 1 [Source:HGNC Symbol;Acc:23186]                                   |
| 574 | ENSG00000089009 | 13127.82948 | 0.809182731  | 0.049356664 | 6.81E-59 | RPL6      | ribosomal protein L6 [Source:HGNC Symbol;Acc:10362]                                    |
| 575 | ENSG00000173744 | 3441.838098 | -1.196518208 | 0.072991799 | 7.04E-59 | AGFG1     | ArfGAP with FG repeats 1 [Source:HGNC Symbol;Acc:5175]                                 |
| 576 | ENSG00000164587 | 9924.900873 | 0.91618496   | 0.05593658  | 8.78E-59 | RPS14     | ribosomal protein S14 [Source:HGNC Symbol;Acc:10387]                                   |
| 577 | ENSG00000262088 | 4972.187339 | 1.054693345  | 0.064426621 | 1.01E-58 | RPS25     | ribosomal protein S25 [Source:HGNC Symbol;Acc:10413]                                   |
| 578 | ENSG00000172757 | 25205.41952 | -0.719009527 | 0.04392773  | 1.05E-58 | CFL1      | cofilin 1 (non-muscle) [Source:HGNC Symbol;Acc:1874]                                   |
| 579 | ENSG00000140853 | 10036.02867 | -0.834155717 | 0.051007724 | 1.33E-58 | NLRCS     | NLR family, CARD domain containing 5 [Source:HGNC Symbol;Acc:29933]                    |
| 580 | ENSG00000107372 | 4758.185117 | -1.175547038 | 0.072002473 | 2.06E-58 | ZFAND5    | zinc finger, AN1-type domain 5 [Source:HGNC Symbol;Acc:13008]                          |
| 581 | ENSG00000204960 | 223.5769148 | 5.080508927  | 0.311309764 | 2.30E-58 | BLACE     | B-cell acute lymphoblastic leukemia expressed [Source:HGNC Symbol;Acc:20484]           |
| 582 | ENSG00000198814 | 1616.868996 | 1.636303455  | 0.100433378 | 3.59E-58 | GK        | glycerol kinase [Source:HGNC Symbol;Acc:4289]                                          |

|     |                 |             |              |             |          |          |                                                                                          |
|-----|-----------------|-------------|--------------|-------------|----------|----------|------------------------------------------------------------------------------------------|
| 583 | ENSG00000229117 | 19087.56055 | 0.876744096  | 0.053828491 | 3.87E-58 | RPL41    | ribosomal protein L41 [Source:HGNC Symbol;Acc:10354]                                     |
| 584 | ENSG00000231500 | 3000.930544 | 1.110410976  | 0.068192383 | 4.14E-58 | RPS18    | ribosomal protein S18 [Source:HGNC Symbol;Acc:10401]                                     |
| 585 | ENSG00000235650 | 3000.930113 | 1.110409422  | 0.068192354 | 4.14E-58 | RPS18    | ribosomal protein S18 [Source:HGNC Symbol;Acc:10401]                                     |
| 586 | ENSG00000226225 | 3000.740659 | 1.11022202   | 0.068190909 | 4.29E-58 | RPS18    | ribosomal protein S18 [Source:HGNC Symbol;Acc:10401]                                     |
| 587 | ENSG00000223367 | 3001.605332 | 1.109542613  | 0.068201407 | 5.26E-58 | RPS18    | ribosomal protein S18 [Source:HGNC Symbol;Acc:10401]                                     |
| 588 | ENSG00000185477 | 938.7706773 | 1.955113155  | 0.120198269 | 5.50E-58 | GPRIN3   | GPRIN family member 3 [Source:HGNC Symbol;Acc:27733]                                     |
| 589 | ENSG00000096150 | 2984.962827 | 1.109249918  | 0.068203251 | 5.66E-58 | RPS18    | ribosomal protein S18 [Source:HGNC Symbol;Acc:10401]                                     |
| 590 | ENSG00000112335 | 3587.211631 | -1.176694305 | 0.072402095 | 6.83E-58 | SNX3     | sorting nexin 3 [Source:HGNC Symbol;Acc:11174]                                           |
| 591 | ENSG00000259858 | 3300.432004 | -1.151586108 | 0.0708677   | 7.10E-58 | MGAM     | maltase-glucoamylase (alpha-glucosidase) [Source:HGNC Symbol;Acc:7043]                   |
| 592 | ENSG00000121742 | 246.8798856 | -3.787651173 | 0.233191296 | 7.96E-58 | GJB6     | gap junction protein, beta 6, 30kDa [Source:HGNC Symbol;Acc:4288]                        |
| 593 | ENSG00000198146 | 2694.798806 | -1.272221806 | 0.078353403 | 8.72E-58 | ZNF770   | zinc finger protein 770 [Source:HGNC Symbol;Acc:26061]                                   |
| 594 | ENSG00000167173 | 2757.955077 | 1.485359503  | 0.091527591 | 9.98E-58 | C15orf39 | chromosome 15 open reading frame 39 [Source:HGNC Symbol;Acc:24497]                       |
| 595 | ENSG00000134460 | 299.2643595 | 3.903657651  | 0.241039754 | 1.72E-57 | IL2RA    | interleukin 2 receptor, alpha [Source:HGNC Symbol;Acc:6008]                              |
| 596 | ENSG00000179344 | 353.5600264 | 3.251085967  | 0.201302991 | 3.55E-57 | HLA-DQB1 | major histocompatibility complex, class II, DQ beta 1 [Source:HGNC Symbol;Acc:4944]      |
| 597 | ENSG00000150782 | 816.4507278 | -1.935070454 | 0.119937079 | 4.61E-57 | IL18     | interleukin 18 (interferon-gamma-inducing factor) [Source:HGNC Symbol;Acc:5986]          |
| 598 | ENSG00000173559 | 5874.157741 | 0.954708133  | 0.059189673 | 4.94E-57 | NABP1    | nucleic acid binding protein 1 [Source:HGNC Symbol;Acc:26232]                            |
| 599 | ENSG00000104918 | 1569.386338 | -1.595230849 | 0.098913903 | 5.11E-57 | RETN     | resistin [Source:HGNC Symbol;Acc:20389]                                                  |
| 600 | ENSG00000166971 | 1640.002229 | -1.500831193 | 0.093066894 | 5.19E-57 | AKTIP    | AKT interacting protein [Source:HGNC Symbol;Acc:16710]                                   |
| 601 | ENSG00000159674 | 579.3795351 | 3.070236557  | 0.190597028 | 6.92E-57 | SPON2    | spondin 2, extracellular matrix protein [Source:HGNC Symbol;Acc:11253]                   |
| 602 | ENSG00000013441 | 6339.326474 | -0.879325498 | 0.054654385 | 9.50E-57 | CLK1     | CDC-like kinase 1 [Source:HGNC Symbol;Acc:2068]                                          |
| 603 | ENSG00000060138 | 1448.880883 | 1.524951726  | 0.094794814 | 9.79E-57 | YBX3     | Y box binding protein 3 [Source:HGNC Symbol;Acc:2428]                                    |
| 604 | ENSG00000035664 | 3468.842107 | -1.108521365 | 0.068992933 | 1.34E-56 | DAPK2    | death-associated protein kinase 2 [Source:HGNC Symbol;Acc:2675]                          |
| 605 | ENSG00000161970 | 11317.50961 | 0.84244377   | 0.052547017 | 2.36E-56 | RPL26    | ribosomal protein L26 [Source:HGNC Symbol;Acc:10327]                                     |
| 606 | ENSG00000221983 | 9688.444982 | 0.798355928  | 0.04981106  | 2.53E-56 | UBA52    | ubiquitin A-52 residue ribosomal protein fusion product 1 [Source:HGNC Symbol;Acc:12458] |
| 607 | ENSG00000188786 | 2111.651981 | -1.288194577 | 0.08037605  | 2.55E-56 | MTF1     | metal-regulatory transcription factor 1 [Source:HGNC Symbol;Acc:7428]                    |
| 608 | ENSG00000174748 | 11844.9991  | 0.83614538   | 0.052218174 | 3.22E-56 | RPL15    | ribosomal protein L15 [Source:HGNC Symbol;Acc:10306]                                     |
| 609 | ENSG00000133246 | 6649.062578 | -1.276182458 | 0.079738306 | 3.64E-56 | PRAM1    | PML-RARA regulated adaptor molecule 1 [Source:HGNC Symbol;Acc:30091]                     |
| 610 | ENSG00000155099 | 2609.886196 | -1.297491952 | 0.081175975 | 5.09E-56 | TMEM55A  | transmembrane protein 55A [Source:HGNC Symbol;Acc:25452]                                 |

|     |                 |             |              |             |          |               |                                                                                           |
|-----|-----------------|-------------|--------------|-------------|----------|---------------|-------------------------------------------------------------------------------------------|
| 611 | ENSG00000166825 | 16891.78949 | -0.759130215 | 0.047604476 | 9.21E-56 | ANPEP         | alanyl (membrane) aminopeptidase [Source:HGNC Symbol;Acc:500]                             |
| 612 | ENSG00000197622 | 22607.35012 | 0.757253107  | 0.047530266 | 1.16E-55 | CDC42SE1      | CDC42 small effector 1 [Source:HGNC Symbol;Acc:17719]                                     |
| 613 | ENSG00000269830 | 516.3500682 | 2.999432411  | 0.188431563 | 1.45E-55 | GPR162        | G protein-coupled receptor 162 [Source:HGNC Symbol;Acc:16693]                             |
| 614 | ENSG00000105640 | 6840.119271 | 1.445242486  | 0.090802187 | 1.49E-55 | RPL18A        | ribosomal protein L18a [Source:HGNC Symbol;Acc:10311]                                     |
| 615 | ENSG00000144040 | 1598.860076 | -1.657946556 | 0.104230704 | 1.74E-55 | SFXN5         | sideroflexin 5 [Source:HGNC Symbol;Acc:16073]                                             |
| 616 | ENSG00000142875 | 1344.736598 | 1.732306962  | 0.109164502 | 3.17E-55 | PRKACB        | protein kinase, cAMP-dependent, catalytic, beta [Source:HGNC Symbol;Acc:9381]             |
| 617 | ENSG00000250510 | 516.7584935 | 2.978202083  | 0.187702453 | 3.27E-55 | GPR162        | G protein-coupled receptor 162 [Source:HGNC Symbol;Acc:16693]                             |
| 618 | ENSG00000203710 | 4847.761354 | -1.037613291 | 0.065441051 | 3.89E-55 | CR1           | complement component (3b/4b) receptor 1 (Knops blood group) [Source:HGNC Symbol;Acc:2334] |
| 619 | ENSG00000184613 | 717.0448237 | 2.279837374  | 0.143801545 | 3.98E-55 | NELL2         | NEL-like 2 (chicken) [Source:HGNC Symbol;Acc:7751]                                        |
| 620 | ENSG00000171988 | 3292.340022 | 1.150578499  | 0.072592685 | 4.26E-55 | JMJD1C        | jumonji domain containing 1C [Source:HGNC Symbol;Acc:12313]                               |
| 621 | ENSG00000100024 | 462.9612214 | -2.78359373  | 0.175779734 | 5.32E-55 | UPB1          | ureidopropionase, beta [Source:HGNC Symbol;Acc:16297]                                     |
| 622 | ENSG00000229698 | 2558.176915 | 1.309476761  | 0.082738982 | 6.14E-55 | HLA-F         | major histocompatibility complex, class I, F [Source:HGNC Symbol;Acc:4963]                |
| 623 | ENSG00000171791 | 768.7415014 | 2.076735873  | 0.131357684 | 8.00E-55 | BCL2          | B-cell CLL/lymphoma 2 [Source:HGNC Symbol;Acc:990]                                        |
| 624 | ENSG00000070495 | 1389.491235 | -1.657164602 | 0.104835484 | 8.31E-55 | JMJD6         | jumonji domain containing 6 [Source:HGNC Symbol;Acc:19355]                                |
| 625 | ENSG00000149084 | 1478.829463 | -1.455838353 | 0.092312772 | 1.48E-54 | HSD17B12      | hydroxysteroid (17-beta) dehydrogenase 12 [Source:HGNC Symbol;Acc:18646]                  |
| 626 | ENSG00000047644 | 1712.257439 | 1.511479412  | 0.095843762 | 1.49E-54 | WWC3          | WWC family member 3 [Source:HGNC Symbol;Acc:29237]                                        |
| 627 | ENSG00000068024 | 1401.413289 | -1.722447726 | 0.109263927 | 1.64E-54 | HDAC4         | histone deacetylase 4 [Source:HGNC Symbol;Acc:14063]                                      |
| 628 | ENSG00000112077 | 194.106689  | -4.535274512 | 0.287812947 | 1.81E-54 | RHAG          | Rh-associated glycoprotein [Source:HGNC Symbol;Acc:10006]                                 |
| 629 | ENSG00000180304 | 4579.407459 | 1.076969622  | 0.068541983 | 3.69E-54 | OAZ2          | ornithine decarboxylase antizyme 2 [Source:HGNC Symbol;Acc:8096]                          |
| 630 | ENSG00000131236 | 26238.80656 | -0.702486869 | 0.044710499 | 3.72E-54 | CAP1          | CAP, adenylate cyclase-associated protein 1 (yeast) [Source:HGNC Symbol;Acc:20040]        |
| 631 | ENSG00000169131 | 1931.277842 | -1.37579239  | 0.087667439 | 4.98E-54 | ZNF354A       | zinc finger protein 354A [Source:HGNC Symbol;Acc:11628]                                   |
| 632 | ENSG00000167106 | 1114.211969 | 2.029582811  | 0.129607223 | 8.47E-54 | FAM102A       | family with sequence similarity 102, member A [Source:HGNC Symbol;Acc:31419]              |
| 633 | ENSG00000213386 | 173.4400682 | -5.147402137 | 0.328744474 | 8.69E-54 | RP11-779O18.2 |                                                                                           |
| 634 | ENSG00000139132 | 1408.954999 | -1.638839201 | 0.104892651 | 1.48E-53 | FGD4          | FYVE, RhoGEF and PH domain containing 4 [Source:HGNC Symbol;Acc:19125]                    |
| 635 | ENSG00000167202 | 3154.959438 | -1.239002505 | 0.079317598 | 1.55E-53 | TBC1D2B       | TBC1 domain family, member 2B [Source:HGNC Symbol;Acc:29183]                              |
| 636 | ENSG00000143952 | 1647.048687 | -1.39793107  | 0.089523708 | 1.69E-53 | VPS54         | vacuolar protein sorting 54 homolog (S. cerevisiae) [Source:HGNC Symbol;Acc:18652]        |
| 637 | ENSG00000173890 | 1233.642743 | -1.529883671 | 0.098035268 | 1.96E-53 | GPR160        | G protein-coupled receptor 160 [Source:HGNC Symbol;Acc:23693]                             |
| 638 | ENSG00000239329 | 762.8145027 | 2.167395469  | 0.138938761 | 2.15E-53 | HLA-DMB       | major histocompatibility complex, class II, DM beta [Source:HGNC Symbol;Acc:4935]         |

|     |                 |             |              |             |          |            |                                                                                                                     |
|-----|-----------------|-------------|--------------|-------------|----------|------------|---------------------------------------------------------------------------------------------------------------------|
| 639 | ENSG00000010404 | 5574.056271 | 1.103270751  | 0.070757368 | 2.40E-53 | IDS        | iduronate 2-sulfatase [Source:HGNC Symbol;Acc:5389]                                                                 |
| 640 | ENSG00000139193 | 633.584349  | 2.431577822  | 0.156087395 | 2.99E-53 | CD27       | CD27 molecule [Source:HGNC Symbol;Acc:11922]                                                                        |
| 641 | ENSG00000165929 | 966.8957938 | 2.129967124  | 0.137283794 | 8.01E-53 | TC2N       | tandem C2 domains, nuclear [Source:HGNC Symbol;Acc:19859]                                                           |
| 642 | ENSG00000164938 | 8022.15119  | 0.891815547  | 0.057521532 | 9.50E-53 | TP53INP1   | tumor protein p53 inducible nuclear protein 1 [Source:HGNC Symbol;Acc:18022]                                        |
| 643 | ENSG00000161955 | 1767.751712 | -1.310069047 | 0.084499983 | 9.52E-53 | TNFSF13    | tumor necrosis factor (ligand) superfamily, member 13 [Source:HGNC Symbol;Acc:11928]                                |
| 644 | ENSG00000135049 | 4973.759062 | -1.089594947 | 0.07030785  | 1.05E-52 | AGTPBP1    | ATP/GTP binding protein 1 [Source:HGNC Symbol;Acc:17258]                                                            |
| 645 | ENSG00000134107 | 1385.095073 | 1.54900195   | 0.100120971 | 1.57E-52 | BHLHE40    | basic helix-loop-helix family, member e40 [Source:HGNC Symbol;Acc:1046]                                             |
| 646 | ENSG00000115232 | 3217.798711 | 1.238052154  | 0.080102885 | 2.00E-52 | ITGA4      | integrin, alpha 4 (antigen CD49D, alpha 4 subunit of VLA-4 receptor) [Source:HGNC Symbol;Acc:6140]                  |
| 647 | ENSG00000197506 | 1186.996479 | -1.862806283 | 0.120649407 | 2.55E-52 | SLC28A3    | solute carrier family 28 (concentrative nucleoside transporter), member 3 [Source:HGNC Symbol;Acc:16484]            |
| 648 | ENSG00000183955 | 1325.228578 | -1.479301602 | 0.095890898 | 3.12E-52 | SETD8      | SET domain containing (lysine methyltransferase) 8 [Source:HGNC Symbol;Acc:29489]                                   |
| 649 | ENSG00000198053 | 8010.754837 | -0.783380633 | 0.050782488 | 3.15E-52 | SIRPA      | signal-regulatory protein alpha [Source:HGNC Symbol;Acc:9662]                                                       |
| 650 | ENSG00000112146 | 3820.40883  | -1.021719024 | 0.066272127 | 3.62E-52 | FBXO9      | F-box protein 9 [Source:HGNC Symbol;Acc:13588]                                                                      |
| 651 | ENSG00000136732 | 1605.984305 | 1.463881327  | 0.095235209 | 7.34E-52 | GYPC       | glycophorin C (Gerbich blood group) [Source:HGNC Symbol;Acc:4704]                                                   |
| 652 | ENSG00000225691 | 5750.00737  | 0.871787718  | 0.056795151 | 1.02E-51 | HLA-C      | major histocompatibility complex, class I, C [Source:HGNC Symbol;Acc:4933]                                          |
| 653 | ENSG00000066777 | 3042.821883 | -1.126422713 | 0.073506045 | 1.51E-51 | ARFGEF1    | ADP-ribosylation factor guanine nucleotide-exchange factor 1 (brefeldin A-inhibited) [Source:HGNC Symbol;Acc:15772] |
| 654 | ENSG00000115524 | 22505.11918 | 0.747684335  | 0.048791687 | 1.51E-51 | SF3B1      | splicing factor 3b, subunit 1, 155kDa [Source:HGNC Symbol;Acc:10768]                                                |
| 655 | ENSG00000134419 | 11121.48885 | 0.828812711  | 0.054132725 | 1.85E-51 | RPS15A     | ribosomal protein S15a [Source:HGNC Symbol;Acc:10389]                                                               |
| 656 | ENSG00000049245 | 2874.849865 | -1.059880021 | 0.06925149  | 2.03E-51 | VAMP3      | vesicle-associated membrane protein 3 [Source:HGNC Symbol;Acc:12644]                                                |
| 657 | ENSG00000101307 | 8013.8744   | -0.893577137 | 0.05843022  | 2.42E-51 | SIRPB1     | signal-regulatory protein beta 1 [Source:HGNC Symbol;Acc:15928]                                                     |
| 658 | ENSG00000030582 | 11691.717   | -0.980211533 | 0.064166164 | 3.14E-51 | GRN        | granulin [Source:HGNC Symbol;Acc:4601]                                                                              |
| 659 | ENSG00000139370 | 2415.889908 | 1.231153898  | 0.080691022 | 4.16E-51 | SLC15A4    | solute carrier family 15 (oligopeptide transporter), member 4 [Source:HGNC Symbol;Acc:23090]                        |
| 660 | ENSG00000122406 | 11532.77022 | 0.819033826  | 0.053685715 | 4.25E-51 | RPL5       | ribosomal protein L5 [Source:HGNC Symbol;Acc:10360]                                                                 |
| 661 | ENSG00000169397 | 657.9637304 | -1.985466798 | 0.130148188 | 4.29E-51 | RNASE3     | ribonuclease, RNase A family, 3 [Source:HGNC Symbol;Acc:10046]                                                      |
| 662 | ENSG00000169826 | 3361.464978 | -1.13573207  | 0.074585769 | 6.60E-51 | CSGALNACT2 | chondroitin sulfate N-acetylgalactosaminyltransferase 2 [Source:HGNC Symbol;Acc:24292]                              |
| 663 | ENSG00000155366 | 379.670213  | 3.018665813  | 0.198243244 | 6.60E-51 | RHOC       | ras homolog family member C [Source:HGNC Symbol;Acc:669]                                                            |
| 664 | ENSG00000035687 | 2668.945162 | -1.116779738 | 0.073364629 | 7.09E-51 | ADSS       | adenylosuccinate synthase [Source:HGNC Symbol;Acc:292]                                                              |
| 665 | ENSG00000155096 | 3594.142412 | -1.162334567 | 0.076403736 | 8.15E-51 | AZIN1      | antizyme inhibitor 1 [Source:HGNC Symbol;Acc:16432]                                                                 |
| 666 | ENSG00000168404 | 4973.09002  | -0.950905984 | 0.062578017 | 1.06E-50 | MLKL       | mixed lineage kinase domain-like [Source:HGNC Symbol;Acc:26617]                                                     |

|     |                 |             |              |             |          |                |                                                                                                               |
|-----|-----------------|-------------|--------------|-------------|----------|----------------|---------------------------------------------------------------------------------------------------------------|
| 667 | ENSG00000110651 | 982.489603  | 1.994605356  | 0.13127338  | 1.08E-50 | CD81           | CD81 molecule [Source:HGNC Symbol;Acc:1701]                                                                   |
| 668 | ENSG00000112759 | 603.2664114 | -2.086597948 | 0.13736522  | 1.15E-50 | SLC29A1        | solute carrier family 29 (equilibrative nucleoside transporter), member 1 [Source:HGNC Symbol;Acc:11003]      |
| 669 | ENSG00000272687 | 11232.64482 | -0.948766514 | 0.062509235 | 1.38E-50 | TKT            | transketolase [Source:HGNC Symbol;Acc:11834]                                                                  |
| 670 | ENSG00000271292 | 684.3793448 | -2.06153148  | 0.135830632 | 1.40E-50 | IGHG1          | immunoglobulin heavy constant gamma 1 (G1m marker) [Source:HGNC Symbol;Acc:5525]                              |
| 671 | ENSG00000162747 | 36489.85592 | 0.676816035  | 0.0445953   | 1.40E-50 | FCGR3B         | Fc fragment of IgG, low affinity IIIb, receptor (CD16b) [Source:HGNC Symbol;Acc:3620]                         |
| 672 | ENSG00000211896 | 684.3683915 | -2.061462574 | 0.135832573 | 1.41E-50 | IGHG1          | immunoglobulin heavy constant gamma 1 (G1m marker) [Source:HGNC Symbol;Acc:5525]                              |
| 673 | ENSG00000173517 | 2100.201118 | -1.675471771 | 0.110446335 | 1.55E-50 | PEAK1          | pseudopodium-enriched atypical kinase 1 [Source:HGNC Symbol;Acc:29431]                                        |
| 674 | ENSG00000163931 | 11230.88784 | -0.948465868 | 0.062540021 | 1.66E-50 | TKT            | transketolase [Source:HGNC Symbol;Acc:11834]                                                                  |
| 675 | ENSG00000256797 | 180.7271288 | 7.05268103   | 0.465463176 | 2.04E-50 | KLRF2          | killer cell lectin-like receptor subfamily F, member 2 [Source:HGNC Symbol;Acc:37646]                         |
| 676 | ENSG00000137462 | 5201.562514 | 1.119398409  | 0.073890979 | 2.12E-50 | TLR2           | toll-like receptor 2 [Source:HGNC Symbol;Acc:11848]                                                           |
| 677 | ENSG00000184588 | 1541.396472 | 1.548908033  | 0.102245949 | 2.13E-50 | PDE4B          | phosphodiesterase 4B, cAMP-specific [Source:HGNC Symbol;Acc:8781]                                             |
| 678 | ENSG00000230463 | 437.9164545 | 2.807532953  | 0.185403067 | 2.33E-50 | HLA-DRB3\$0301 | HLA class II histocompatibility antigen, DR beta 3 chain [Source:UniProtKB/Swiss-Prot;Acc:P79483]             |
| 679 | ENSG00000101608 | 14469.74106 | -0.78990355  | 0.052207475 | 2.83E-50 | MYL12A         | myosin, light chain 12A, regulatory, non-sarcomeric [Source:HGNC Symbol;Acc:16701]                            |
| 680 | ENSG00000138696 | 205.88859   | 5.468129635  | 0.361649566 | 3.29E-50 | BMPR1B         | bone morphogenetic protein receptor, type IB [Source:HGNC Symbol;Acc:1077]                                    |
| 681 | ENSG00000143110 | 3217.113929 | -1.131115162 | 0.074832718 | 3.53E-50 | C1orf162       | chromosome 1 open reading frame 162 [Source:HGNC Symbol;Acc:28344]                                            |
| 682 | ENSG00000206305 | 213.4025246 | 4.874115002  | 0.322587016 | 3.85E-50 | HLA-DQA1       | major histocompatibility complex, class II, DQ alpha 1 [Source:HGNC Symbol;Acc:4942]                          |
| 683 | ENSG00000140848 | 3110.363962 | -1.218925672 | 0.080720571 | 4.40E-50 | CPNE2          | copine II [Source:HGNC Symbol;Acc:2315]                                                                       |
| 684 | ENSG00000197756 | 9793.306707 | 0.780508933  | 0.051751345 | 5.83E-50 | RPL37A         | ribosomal protein L37a [Source:HGNC Symbol;Acc:10348]                                                         |
| 685 | ENSG00000232126 | 44763.29743 | 0.606820764  | 0.040243354 | 6.10E-50 | HLA-B          | major histocompatibility complex, class I, B [Source:HGNC Symbol;Acc:4932]                                    |
| 686 | ENSG00000136111 | 810.660239  | 2.022972246  | 0.13419346  | 6.45E-50 | TBC1D4         | TBC1 domain family, member 4 [Source:HGNC Symbol;Acc:19165]                                                   |
| 687 | ENSG00000140416 | 933.9762442 | -1.822239201 | 0.12098794  | 7.92E-50 | TPM1           | tropomyosin 1 (alpha) [Source:HGNC Symbol;Acc:12010]                                                          |
| 688 | ENSG00000135426 | 936.1170231 | 1.825399563  | 0.121376268 | 1.11E-49 | TESPA1         | thymocyte expressed, positive selection associated 1 [Source:HGNC Symbol;Acc:29109]                           |
| 689 | ENSG00000184384 | 498.2106571 | 2.532106999  | 0.168383795 | 1.13E-49 | MAML2          | mastermind-like 2 (Drosophila) [Source:HGNC Symbol;Acc:16259]                                                 |
| 690 | ENSG00000173221 | 5054.581669 | -0.873505471 | 0.058142379 | 1.40E-49 | GLRX           | glutaredoxin (thioltransferase) [Source:HGNC Symbol;Acc:4330]                                                 |
| 691 | ENSG00000244482 | 1433.0881   | -1.711143699 | 0.113959127 | 1.58E-49 | LILRA6         | leukocyte immunoglobulin-like receptor, subfamily A (with TM domain), member 6 [Source:HGNC Symbol;Acc:15495] |
| 692 | ENSG0000064763  | 2383.347696 | -1.249207403 | 0.083232269 | 1.74E-49 | FAR2           | fatty acyl CoA reductase 2 [Source:HGNC Symbol;Acc:25531]                                                     |
| 693 | ENSG00000169877 | 568.433267  | -2.658736506 | 0.177212348 | 1.89E-49 | AHSP           | alpha hemoglobin stabilizing protein [Source:HGNC Symbol;Acc:18075]                                           |
| 694 | ENSG0000090238  | 7164.444817 | 0.921729393  | 0.06146667  | 2.12E-49 | YPEL3          | yippee-like 3 (Drosophila) [Source:HGNC Symbol;Acc:18327]                                                     |

|     |                 |             |              |             |          |         |                                                                                                                     |
|-----|-----------------|-------------|--------------|-------------|----------|---------|---------------------------------------------------------------------------------------------------------------------|
| 695 | ENSG00000214021 | 5929.422192 | -0.958472615 | 0.063948335 | 2.36E-49 | TTL3    | tubulin tyrosine ligase-like family, member 3 [Source:HGNC Symbol;Acc:24483]                                        |
| 696 | ENSG00000133048 | 23003.02784 | -0.674236502 | 0.045057409 | 3.40E-49 | CHI3L1  | chitinase 3-like 1 (cartilage glycoprotein-39) [Source:HGNC Symbol;Acc:1932]                                        |
| 697 | ENSG00000110876 | 10600.94212 | 0.98483641   | 0.065857742 | 3.94E-49 | SELPLG  | selectin P ligand [Source:HGNC Symbol;Acc:10722]                                                                    |
| 698 | ENSG00000175806 | 1010.499507 | -1.59779346  | 0.106903403 | 4.42E-49 | MSRA    | methionine sulfoxide reductase A [Source:HGNC Symbol;Acc:7377]                                                      |
| 699 | ENSG00000118564 | 9321.500752 | -0.828919211 | 0.055496352 | 5.11E-49 | FBXL5   | F-box and leucine-rich repeat protein 5 [Source:HGNC Symbol;Acc:13602]                                              |
| 700 | ENSG00000108622 | 611.9712779 | 2.299384595  | 0.154072519 | 6.15E-49 | ICAM2   | intercellular adhesion molecule 2 [Source:HGNC Symbol;Acc:5345]                                                     |
| 701 | ENSG00000164715 | 1623.438108 | -1.313638014 | 0.088173899 | 9.03E-49 | LMTK2   | lemur tyrosine kinase 2 [Source:HGNC Symbol;Acc:17880]                                                              |
| 702 | ENSG00000154146 | 479.0785388 | 2.539649533  | 0.170543574 | 9.98E-49 | NRGN    | neurogranin (protein kinase C substrate, RC3) [Source:HGNC Symbol;Acc:8000]                                         |
| 703 | ENSG00000064393 | 2137.710038 | -1.162659552 | 0.078204533 | 1.44E-48 | HIPK2   | homeodomain interacting protein kinase 2 [Source:HGNC Symbol;Acc:14402]                                             |
| 704 | ENSG00000182774 | 7005.510846 | 0.792710264  | 0.053341074 | 1.57E-48 | RPS17L  | ribosomal protein S17-like [Source:HGNC Symbol;Acc:40029]                                                           |
| 705 | ENSG00000198918 | 10148.90988 | 0.808933515  | 0.054502027 | 2.07E-48 | RPL39   | ribosomal protein L39 [Source:HGNC Symbol;Acc:10350]                                                                |
| 706 | ENSG00000172794 | 4046.751191 | 0.958962778  | 0.064691242 | 2.73E-48 | RAB37   | RAB37, member RAS oncogene family [Source:HGNC Symbol;Acc:30268]                                                    |
| 707 | ENSG00000168615 | 816.773518  | -2.130635513 | 0.143733965 | 2.73E-48 | ADAM9   | ADAM metallopeptidase domain 9 [Source:HGNC Symbol;Acc:216]                                                         |
| 708 | ENSG00000127946 | 4098.295856 | -0.947421389 | 0.063955446 | 3.15E-48 | HIP1    | huntingtin interacting protein 1 [Source:HGNC Symbol;Acc:4913]                                                      |
| 709 | ENSG00000197747 | 800.0308233 | 1.857136785  | 0.125374906 | 3.20E-48 | S100A10 | S100 calcium binding protein A10 [Source:HGNC Symbol;Acc:10487]                                                     |
| 710 | ENSG00000141574 | 577.1457985 | 2.61929709   | 0.176882903 | 3.42E-48 | SECTM1  | secreted and transmembrane 1 [Source:HGNC Symbol;Acc:10707]                                                         |
| 711 | ENSG00000163661 | 577.6027726 | -2.477006989 | 0.167283994 | 3.46E-48 | PTX3    | pentraxin 3, long [Source:HGNC Symbol;Acc:9692]                                                                     |
| 712 | ENSG00000174600 | 361.0302334 | 3.1992491    | 0.216199754 | 3.99E-48 | CMKLR1  | chemokine-like receptor 1 [Source:HGNC Symbol;Acc:2121]                                                             |
| 713 | ENSG00000106780 | 10852.68123 | -0.762444584 | 0.05154291  | 4.30E-48 | MEGF9   | multiple EGF-like-domains 9 [Source:HGNC Symbol;Acc:3234]                                                           |
| 714 | ENSG00000145592 | 12412.99278 | 0.721387635  | 0.048876795 | 7.02E-48 | RPL37   | ribosomal protein L37 [Source:HGNC Symbol;Acc:10347]                                                                |
| 715 | ENSG00000171940 | 3990.866864 | 0.954719491  | 0.064771529 | 9.37E-48 | ZNF217  | zinc finger protein 217 [Source:HGNC Symbol;Acc:13009]                                                              |
| 716 | ENSG00000154016 | 424.8178238 | 2.863234919  | 0.194482508 | 1.21E-47 | GRAP    | GRB2-related adaptor protein [Source:HGNC Symbol;Acc:4562]                                                          |
| 717 | ENSG00000073756 | 3520.503922 | -1.025376223 | 0.069800973 | 1.95E-47 | PTGS2   | prostaglandin-endoperoxide synthase 2 (prostaglandin G/H synthase and cyclooxygenase) [Source:HGNC Symbol;Acc:9605] |
| 718 | ENSG00000112308 | 6143.170564 | 0.887516059  | 0.060452694 | 2.22E-47 | C6orf62 | chromosome 6 open reading frame 62 [Source:HGNC Symbol;Acc:20998]                                                   |
| 719 | ENSG00000174738 | 523.8748498 | 2.322271272  | 0.158222967 | 2.35E-47 | NR1D2   | nuclear receptor subfamily 1, group D, member 2 [Source:HGNC Symbol;Acc:7963]                                       |
| 720 | ENSG00000120899 | 10189.44402 | -0.780079361 | 0.053170835 | 2.56E-47 | PTK2B   | protein tyrosine kinase 2 beta [Source:HGNC Symbol;Acc:9612]                                                        |
| 721 | ENSG00000228716 | 1530.919763 | -1.355194431 | 0.092439376 | 3.00E-47 | DHFR    | dihydrofolate reductase [Source:HGNC Symbol;Acc:2861]                                                               |
| 722 | ENSG00000180771 | 520.2701416 | 2.305221295  | 0.157389574 | 3.67E-47 | SRSF8   | serine/arginine-rich splicing factor 8 [Source:HGNC Symbol;Acc:16988]                                               |



|     |                 |             |              |             |          |          |                                                                                                                 |
|-----|-----------------|-------------|--------------|-------------|----------|----------|-----------------------------------------------------------------------------------------------------------------|
| 723 | ENSG00000197457 | 757.2807517 | 2.05679059   | 0.140558769 | 4.48E-47 | STMN3    | stathmin-like 3 [Source:HGNC Symbol;Acc:15926]                                                                  |
| 724 | ENSG00000164091 | 3576.257036 | 1.024628523  | 0.070047603 | 4.84E-47 | WDR82    | WD repeat domain 82 [Source:HGNC Symbol;Acc:28826]                                                              |
| 725 | ENSG00000125354 | 3840.174804 | 1.030269486  | 0.070487425 | 5.70E-47 | SEPT6    | septin 6 [Source:HGNC Symbol;Acc:15848]                                                                         |
| 726 | ENSG00000171858 | 3198.615786 | 1.213652661  | 0.083050525 | 5.94E-47 | RPS21    | ribosomal protein S21 [Source:HGNC Symbol;Acc:10409]                                                            |
| 727 | ENSG00000175592 | 158.7729614 | -4.50564155  | 0.309543937 | 1.38E-46 | FOSL1    | FOS-like antigen 1 [Source:HGNC Symbol;Acc:13718]                                                               |
| 728 | ENSG00000102125 | 1816.025684 | -1.209888511 | 0.083122057 | 1.38E-46 | TAZ      | tafazzin [Source:HGNC Symbol;Acc:11577]                                                                         |
| 729 | ENSG00000262599 | 774.3409819 | 1.867604159  | 0.128329896 | 1.43E-46 | KIAA1147 | KIAA1147 [Source:HGNC Symbol;Acc:29472]                                                                         |
| 730 | ENSG00000064601 | 4519.726269 | -0.971050104 | 0.066768711 | 1.65E-46 | CTSA     | cathepsin A [Source:HGNC Symbol;Acc:9251]                                                                       |
| 731 | ENSG00000074706 | 3230.330784 | -1.533987556 | 0.10562981  | 2.24E-46 | IPCEF1   | interaction protein for cytohesin exchange factors 1 [Source:HGNC Symbol;Acc:21204]                             |
| 732 | ENSG00000111206 | 611.553794  | -2.160369315 | 0.148851912 | 2.54E-46 | FOXM1    | forkhead box M1 [Source:HGNC Symbol;Acc:3818]                                                                   |
| 733 | ENSG00000257093 | 774.4714994 | 1.864418813  | 0.128577944 | 3.08E-46 | KIAA1147 | KIAA1147 [Source:HGNC Symbol;Acc:29472]                                                                         |
| 734 | ENSG00000018189 | 516.2537083 | 2.217122057  | 0.153133849 | 4.23E-46 | RUFY3    | RUN and FYVE domain containing 3 [Source:HGNC Symbol;Acc:30285]                                                 |
| 735 | ENSG00000198286 | 792.3493102 | 2.415548246  | 0.166977792 | 5.04E-46 | CARD11   | caspace recruitment domain family, member 11 [Source:HGNC Symbol;Acc:16393]                                     |
| 736 | ENSG00000112486 | 306.0943027 | 3.27116366   | 0.226188198 | 5.34E-46 | CCR6     | chemokine (C-C motif) receptor 6 [Source:HGNC Symbol;Acc:1607]                                                  |
| 737 | ENSG00000043462 | 9860.950635 | -0.811427531 | 0.056115395 | 5.51E-46 | LCP2     | lymphocyte cytosolic protein 2 (SH2 domain containing leukocyte protein of 76kDa) [Source:HGNC Symbol;Acc:6529] |
| 738 | ENSG00000143390 | 1303.218569 | 1.45303149   | 0.100578591 | 6.67E-46 | RFX5     | regulatory factor X, 5 (influences HLA class II expression) [Source:HGNC Symbol;Acc:9986]                       |
| 739 | ENSG00000213903 | 3013.173484 | -1.113058702 | 0.07708966  | 7.50E-46 | LTB4R    | leukotriene B4 receptor [Source:HGNC Symbol;Acc:6713]                                                           |
| 740 | ENSG00000111860 | 1065.562635 | 1.757390877  | 0.121840767 | 9.29E-46 | CEP85L   | centrosomal protein 85kDa-like [Source:HGNC Symbol;Acc:21638]                                                   |
| 741 | ENSG00000170458 | 1354.945776 | 1.951840152  | 0.135473186 | 1.17E-45 | CD14     | CD14 molecule [Source:HGNC Symbol;Acc:1628]                                                                     |
| 742 | ENSG00000182899 | 6423.612624 | 0.800286319  | 0.055607418 | 1.47E-45 | RPL35A   | ribosomal protein L35a [Source:HGNC Symbol;Acc:10345]                                                           |
| 743 | ENSG00000124766 | 446.9971091 | 2.434693616  | 0.169558901 | 2.36E-45 | SOX4     | SRY (sex determining region Y)-box 4 [Source:HGNC Symbol;Acc:11200]                                             |
| 744 | ENSG00000155966 | 355.1977647 | -2.552667763 | 0.177811631 | 2.46E-45 | AFF2     | AF4/FMR2 family, member 2 [Source:HGNC Symbol;Acc:3776]                                                         |
| 745 | ENSG00000130066 | 32586.53674 | -0.688297922 | 0.047948275 | 2.49E-45 | SAT1     | spermidine/spermine N1-acetyltransferase 1 [Source:HGNC Symbol;Acc:10540]                                       |
| 746 | ENSG00000124203 | 560.1785325 | 2.164367218  | 0.150812306 | 2.62E-45 | ZNF831   | zinc finger protein 831 [Source:HGNC Symbol;Acc:16167]                                                          |
| 747 | ENSG00000260040 | 146.5815711 | -4.600286402 | 0.320623612 | 2.75E-45 | KEL      | Kell blood group, metallo-endopeptidase [Source:HGNC Symbol;Acc:6308]                                           |
| 748 | ENSG00000269754 | 355.5055938 | -2.548834294 | 0.177714207 | 2.98E-45 | AFF2     | AF4/FMR2 family, member 2 [Source:HGNC Symbol;Acc:3776]                                                         |
| 749 | ENSG00000164483 | 748.7662656 | 2.382697202  | 0.166183237 | 3.17E-45 | SAMD3    | sterile alpha motif domain containing 3 [Source:HGNC Symbol;Acc:21574]                                          |
| 750 | ENSG00000091106 | 1712.743087 | -1.444117962 | 0.100778042 | 3.56E-45 | NLR4     | NLR family, CARD domain containing 4 [Source:HGNC Symbol;Acc:16412]                                             |

|     |                 |             |              |             |          |        |                                                                                |
|-----|-----------------|-------------|--------------|-------------|----------|--------|--------------------------------------------------------------------------------|
| 751 | ENSG00000135404 | 7910.456919 | -0.769270042 | 0.05369348  | 3.69E-45 | CD63   | CD63 molecule [Source:HGNC Symbol;Acc:1692]                                    |
| 752 | ENSG00000157456 | 307.8262417 | -2.872822418 | 0.200913767 | 5.54E-45 | CCNB2  | cyclin B2 [Source:HGNC Symbol;Acc:1580]                                        |
| 753 | ENSG00000229252 | 14386.50131 | 0.720241239  | 0.050372864 | 5.57E-45 | HLA-E  | major histocompatibility complex, class I, E [Source:HGNC Symbol;Acc:4962]     |
| 754 | ENSG00000206493 | 14386.36584 | 0.719964421  | 0.050353516 | 5.57E-45 | HLA-E  | major histocompatibility complex, class I, E [Source:HGNC Symbol;Acc:4962]     |
| 755 | ENSG00000233904 | 14386.34063 | 0.719836503  | 0.050362239 | 5.98E-45 | HLA-E  | major histocompatibility complex, class I, E [Source:HGNC Symbol;Acc:4962]     |
| 756 | ENSG00000230254 | 14386.18604 | 0.719737452  | 0.050370683 | 6.36E-45 | HLA-E  | major histocompatibility complex, class I, E [Source:HGNC Symbol;Acc:4962]     |
| 757 | ENSG00000137501 | 502.622636  | 2.401995731  | 0.168275323 | 7.83E-45 | SYTL2  | synaptotagmin-like 2 [Source:HGNC Symbol;Acc:15585]                            |
| 758 | ENSG00000150347 | 438.7191892 | 2.541542726  | 0.178083982 | 8.12E-45 | ARID5B | AT rich interactive domain 5B (MRF1-like) [Source:HGNC Symbol;Acc:17362]       |
| 759 | ENSG00000196092 | 628.437741  | 2.166721746  | 0.151895017 | 8.97E-45 | PAX5   | paired box 5 [Source:HGNC Symbol;Acc:8619]                                     |
| 760 | ENSG00000189060 | 3580.033675 | -0.943213074 | 0.066172975 | 1.05E-44 | H1FO   | H1 histone family, member 0 [Source:HGNC Symbol;Acc:4714]                      |
| 761 | ENSG00000123485 | 520.4576577 | -2.193977279 | 0.154163087 | 1.44E-44 | HJURP  | Holliday junction recognition protein [Source:HGNC Symbol;Acc:25444]           |
| 762 | ENSG00000186105 | 246.2705132 | 3.647511684  | 0.256320621 | 1.46E-44 | LRRC70 | leucine rich repeat containing 70 [Source:HGNC Symbol;Acc:35155]               |
| 763 | ENSG00000110031 | 1351.964403 | 1.46092061   | 0.102678523 | 1.50E-44 | LPXN   | leupaxin [Source:HGNC Symbol;Acc:14061]                                        |
| 764 | ENSG00000205133 | 917.9082527 | -1.726172514 | 0.121350224 | 1.58E-44 | TRIQK  | triple QxxK/R motif containing [Source:HGNC Symbol;Acc:27828]                  |
| 765 | ENSG00000176083 | 286.3235923 | 3.454981262  | 0.242918067 | 1.62E-44 | ZNF683 | zinc finger protein 683 [Source:HGNC Symbol;Acc:28495]                         |
| 766 | ENSG00000227231 | 584.7548722 | -1.957360357 | 0.13765396  | 1.70E-44 | IER3   | immediate early response 3 [Source:HGNC Symbol;Acc:5392]                       |
| 767 | ENSG00000198574 | 302.6081396 | 3.277156894  | 0.230473396 | 1.70E-44 | SH2D1B | SH2 domain containing 1B [Source:HGNC Symbol;Acc:30416]                        |
| 768 | ENSG00000230128 | 584.5507099 | -1.956586715 | 0.137679232 | 1.90E-44 | IER3   | immediate early response 3 [Source:HGNC Symbol;Acc:5392]                       |
| 769 | ENSG00000235030 | 584.5508116 | -1.956581188 | 0.137679549 | 1.90E-44 | IER3   | immediate early response 3 [Source:HGNC Symbol;Acc:5392]                       |
| 770 | ENSG00000270466 | 386.2780688 | 2.861363008  | 0.201369496 | 1.94E-44 |        | Uncharacterized protein [Source:UniProtKB/TrEMBL;Acc:S4R362]                   |
| 771 | ENSG00000023909 | 863.7876828 | -1.87119087  | 0.131713706 | 2.03E-44 | GCLM   | glutamate-cysteine ligase, modifier subunit [Source:HGNC Symbol;Acc:4312]      |
| 772 | ENSG00000143924 | 4662.870541 | -0.863884837 | 0.060814322 | 2.06E-44 | EML4   | echinoderm microtubule associated protein like 4 [Source:HGNC Symbol;Acc:1316] |
| 773 | ENSG00000237155 | 584.3578779 | -1.955857374 | 0.137688729 | 2.07E-44 | IER3   | immediate early response 3 [Source:HGNC Symbol;Acc:5392]                       |
| 774 | ENSG00000139641 | 2643.194791 | 1.125795529  | 0.07932205  | 2.46E-44 | ESYT1  | extended synaptotagmin-like protein 1 [Source:HGNC Symbol;Acc:29534]           |
| 775 | ENSG00000132718 | 539.0267188 | 2.135588902  | 0.150732663 | 3.49E-44 | SYT11  | synaptotagmin XI [Source:HGNC Symbol;Acc:19239]                                |
| 776 | ENSG00000188846 | 7171.401279 | 0.79210695   | 0.055922575 | 3.67E-44 | RPL14  | ribosomal protein L14 [Source:HGNC Symbol;Acc:10305]                           |
| 777 | ENSG00000124491 | 606.5041387 | 2.07245637   | 0.146390748 | 4.07E-44 | F13A1  | coagulation factor XIII, A1 polypeptide [Source:HGNC Symbol;Acc:3531]          |
| 778 | ENSG00000114391 | 5488.608077 | 0.816923427  | 0.057722451 | 4.33E-44 | RPL24  | ribosomal protein L24 [Source:HGNC Symbol;Acc:10325]                           |

|     |                 |             |              |             |          |               |                                                                                                                             |
|-----|-----------------|-------------|--------------|-------------|----------|---------------|-----------------------------------------------------------------------------------------------------------------------------|
| 779 | ENSG00000186908 | 3750.201877 | -0.958434462 | 0.067829378 | 5.95E-44 | ZDHC17        | zinc finger, DHHC-type containing 17 [Source:HGNC Symbol;Acc:18412]                                                         |
| 780 | ENSG00000066279 | 482.9362326 | -2.228995536 | 0.157766953 | 6.09E-44 | ASPM          | asp (abnormal spindle) homolog, microcephaly associated (Drosophila) [Source:HGNC Symbol;Acc:19048]                         |
| 781 | ENSG00000164506 | 2447.092955 | -1.22871893  | 0.087117637 | 8.58E-44 | STXBP5        | syntaxin binding protein 5 (tomosyn) [Source:HGNC Symbol;Acc:19665]                                                         |
| 782 | ENSG00000125753 | 14726.0844  | -0.630964769 | 0.044741325 | 8.77E-44 | VASP          | vasodilator-stimulated phosphoprotein [Source:HGNC Symbol;Acc:12652]                                                        |
| 783 | ENSG00000100097 | 1618.193262 | -1.341336276 | 0.095122283 | 8.93E-44 | LGALS1        | lectin, galactoside-binding, soluble, 1 [Source:HGNC Symbol;Acc:6561]                                                       |
| 784 | ENSG00000187037 | 997.2573119 | -1.651485949 | 0.117199368 | 1.03E-43 | GPR141        | G protein-coupled receptor 141 [Source:HGNC Symbol;Acc:19997]                                                               |
| 785 | ENSG00000184489 | 592.8483426 | 2.665952328  | 0.189205344 | 1.04E-43 | PTP4A3        | protein tyrosine phosphatase type IVA, member 3 [Source:HGNC Symbol;Acc:9636]                                               |
| 786 | ENSG00000153179 | 6272.927246 | 0.865901973  | 0.061482783 | 1.14E-43 | RASSF3        | Ras association (RalGDS/AF-6) domain family member 3 [Source:HGNC Symbol;Acc:14271]                                         |
| 787 | ENSG00000115159 | 1336.659311 | -1.313400188 | 0.093285466 | 1.21E-43 | GPD2          | glycerol-3-phosphate dehydrogenase 2 (mitochondrial) [Source:HGNC Symbol;Acc:4456]                                          |
| 788 | ENSG00000166340 | 9398.210171 | -0.898720089 | 0.063836963 | 1.23E-43 | TPP1          | tripeptidyl peptidase I [Source:HGNC Symbol;Acc:2073]                                                                       |
| 789 | ENSG00000138378 | 1168.014233 | 1.603824888  | 0.114018338 | 1.45E-43 | STAT4         | signal transducer and activator of transcription 4 [Source:HGNC Symbol;Acc:11365]                                           |
| 790 | ENSG00000005810 | 2960.018034 | 1.038827339  | 0.073967701 | 1.98E-43 | MYCBP2        | MYC binding protein 2, E3 ubiquitin protein ligase [Source:HGNC Symbol;Acc:23386]                                           |
| 791 | ENSG00000172183 | 1688.068287 | 1.45931769   | 0.104002282 | 2.36E-43 | ISG20         | interferon stimulated exonuclease gene 20kDa [Source:HGNC Symbol;Acc:6130]                                                  |
| 792 | ENSG00000198668 | 14682.59665 | -0.756458213 | 0.053932853 | 2.56E-43 | CALM1         | calmodulin 1 (phosphorylase kinase, delta) [Source:HGNC Symbol;Acc:1442]                                                    |
| 793 | ENSG00000214846 | 328.1701937 | -2.596958723 | 0.18516982  | 2.60E-43 | RP11-115L11.1 |                                                                                                                             |
| 794 | ENSG00000168394 | 4256.26991  | 0.86487053   | 0.061694133 | 2.82E-43 | TAP1          | transporter 1, ATP-binding cassette, sub-family B (MDR/TAP) [Source:HGNC Symbol;Acc:43]                                     |
| 795 | ENSG00000169575 | 240.5855028 | 3.359491044  | 0.239654533 | 2.85E-43 | VPREB1        | pre-B lymphocyte 1 [Source:HGNC Symbol;Acc:12709]                                                                           |
| 796 | ENSG00000206450 | 5465.327079 | 0.859945852  | 0.061349744 | 2.88E-43 | HLA-B         | major histocompatibility complex, class I, B [Source:HGNC Symbol;Acc:4932]                                                  |
| 797 | ENSG00000141012 | 1689.435617 | -1.235109046 | 0.088200445 | 3.49E-43 | GALNS         | galactosamine (N-acetyl)-6-sulfate sulfatase [Source:HGNC Symbol;Acc:4122]                                                  |
| 798 | ENSG00000106392 | 1839.890811 | -1.307084022 | 0.093387783 | 3.85E-43 | C1GALT1       | core 1 synthase, glycoprotein-N-acetylgalactosamine 3-beta-galactosyltransferase, 1 [Source:HGNC Symbol;Acc:24337]          |
| 799 | ENSG00000000971 | 334.5181841 | 2.67093448   | 0.191113829 | 5.14E-43 | CFH           | complement factor H [Source:HGNC Symbol;Acc:4883]                                                                           |
| 800 | ENSG00000006652 | 4368.686493 | -0.960378261 | 0.068780166 | 6.13E-43 | IFRD1         | interferon-related developmental regulator 1 [Source:HGNC Symbol;Acc:5456]                                                  |
| 801 | ENSG00000107679 | 578.5319145 | 2.280273426  | 0.163324463 | 6.25E-43 | PLEKHA1       | pleckstrin homology domain containing, family A (phosphoinositide binding specific) member 1 [Source:HGNC Symbol;Acc:14335] |
| 802 | ENSG00000162244 | 6274.075501 | 0.957070331  | 0.068554969 | 6.32E-43 | RPL29         | ribosomal protein L29 [Source:HGNC Symbol;Acc:10331]                                                                        |
| 803 | ENSG00000118985 | 977.3166793 | -2.007965647 | 0.14385239  | 6.51E-43 | ELL2          | elongation factor, RNA polymerase II, 2 [Source:HGNC Symbol;Acc:17064]                                                      |
| 804 | ENSG00000127481 | 6262.744293 | -0.890485785 | 0.063800139 | 6.60E-43 | UBR4          | ubiquitin protein ligase E3 component n-recognin 4 [Source:HGNC Symbol;Acc:30313]                                           |
| 805 | ENSG00000177455 | 509.44863   | 2.22319293   | 0.159607271 | 9.80E-43 | CD19          | CD19 molecule [Source:HGNC Symbol;Acc:1633]                                                                                 |
| 806 | ENSG00000099985 | 360.6763344 | -2.469942015 | 0.177553992 | 1.26E-42 | OSM           | oncostatin M [Source:HGNC Symbol;Acc:8506]                                                                                  |

|     |                 |             |              |             |          |           |                                                                                                           |
|-----|-----------------|-------------|--------------|-------------|----------|-----------|-----------------------------------------------------------------------------------------------------------|
| 807 | ENSG00000138778 | 410.1992945 | -2.511292319 | 0.180588979 | 1.35E-42 | CENPE     | centromere protein E, 312kDa [Source:HGNC Symbol;Acc:1856]                                                |
| 808 | ENSG00000163625 | 2363.792173 | -1.455943118 | 0.104804229 | 1.64E-42 | WDFY3     | WD repeat and FYVE domain containing 3 [Source:HGNC Symbol;Acc:20751]                                     |
| 809 | ENSG00000112576 | 7672.780037 | -0.765417861 | 0.055110171 | 1.71E-42 | CCND3     | cyclin D3 [Source:HGNC Symbol;Acc:1585]                                                                   |
| 810 | ENSG00000132274 | 3882.103754 | 0.936347876  | 0.067526656 | 2.34E-42 | TRIM22    | tripartite motif containing 22 [Source:HGNC Symbol;Acc:16379]                                             |
| 811 | ENSG00000214688 | 363.6528868 | 2.885548969  | 0.208129312 | 2.41E-42 | C10orf105 | chromosome 10 open reading frame 105 [Source:HGNC Symbol;Acc:20304]                                       |
| 812 | ENSG00000172809 | 5436.298372 | 0.922467828  | 0.066610541 | 2.99E-42 | RPL38     | ribosomal protein L38 [Source:HGNC Symbol;Acc:10349]                                                      |
| 813 | ENSG00000233276 | 1043.309082 | 1.901203938  | 0.137301943 | 3.06E-42 | GPX1      | glutathione peroxidase 1 [Source:HGNC Symbol;Acc:4553]                                                    |
| 814 | ENSG00000204267 | 2616.679894 | 1.154413927  | 0.08338803  | 3.18E-42 | TAP2      | transporter 2, ATP-binding cassette, sub-family B (MDR/TAP) [Source:HGNC Symbol;Acc:44]                   |
| 815 | ENSG00000134627 | 795.1384227 | -1.796423533 | 0.129917591 | 4.00E-42 | PIWIL4    | piwi-like RNA-mediated gene silencing 4 [Source:HGNC Symbol;Acc:18444]                                    |
| 816 | ENSG00000137841 | 14666.90412 | -0.826819608 | 0.059824101 | 4.38E-42 | PLCB2     | phospholipase C, beta 2 [Source:HGNC Symbol;Acc:9055]                                                     |
| 817 | ENSG00000135679 | 2875.877433 | 1.158792883  | 0.083856017 | 4.49E-42 | MDM2      | MDM2 oncogene, E3 ubiquitin protein ligase [Source:HGNC Symbol;Acc:6973]                                  |
| 818 | ENSG00000188452 | 1718.203551 | 1.235454819  | 0.089464855 | 5.12E-42 | CERKL     | ceramide kinase-like [Source:HGNC Symbol;Acc:21699]                                                       |
| 819 | ENSG00000104814 | 939.0129389 | 1.60110259   | 0.115947541 | 5.15E-42 | MAP4K1    | mitogen-activated protein kinase kinase kinase kinase 1 [Source:HGNC Symbol;Acc:6863]                     |
| 820 | ENSG00000142197 | 1647.022908 | -1.193518581 | 0.086579498 | 7.14E-42 | DOPEY2    | dopey family member 2 [Source:HGNC Symbol;Acc:1291]                                                       |
| 821 | ENSG00000140284 | 398.8065687 | -2.516069067 | 0.182623038 | 7.95E-42 | SLC27A2   | solute carrier family 27 (fatty acid transporter), member 2 [Source:HGNC Symbol;Acc:10996]                |
| 822 | ENSG00000104998 | 502.2997173 | 2.272236181  | 0.165117284 | 9.91E-42 | IL27RA    | interleukin 27 receptor, alpha [Source:HGNC Symbol;Acc:17290]                                             |
| 823 | ENSG00000099622 | 5783.824636 | 0.857591761  | 0.062326467 | 1.01E-41 | CIRBP     | cold inducible RNA binding protein [Source:HGNC Symbol;Acc:1982]                                          |
| 824 | ENSG00000167261 | 7077.656486 | 0.805024027  | 0.058514766 | 1.04E-41 | DPEP2     | dipeptidase 2 [Source:HGNC Symbol;Acc:23028]                                                              |
| 825 | ENSG00000271541 | 1596.680787 | 1.543080721  | 0.11223076  | 1.17E-41 | IGHM      | immunoglobulin heavy constant mu [Source:HGNC Symbol;Acc:5541]                                            |
| 826 | ENSG00000164932 | 153.5536523 | 5.51778087   | 0.401492208 | 1.27E-41 | CTHRC1    | collagen triple helix repeat containing 1 [Source:HGNC Symbol;Acc:18831]                                  |
| 827 | ENSG00000093167 | 2372.446333 | -1.211054193 | 0.088127858 | 1.29E-41 | LRRFIP2   | leucine rich repeat (in FLII) interacting protein 2 [Source:HGNC Symbol;Acc:6703]                         |
| 828 | ENSG00000108405 | 4617.408998 | -0.858627176 | 0.062493005 | 1.33E-41 | P2RX1     | purinergic receptor P2X, ligand-gated ion channel, 1 [Source:HGNC Symbol;Acc:8533]                        |
| 829 | ENSG00000146285 | 593.6508056 | 2.010969014  | 0.146455708 | 1.50E-41 | SCML4     | sex comb on midleg-like 4 (Drosophila) [Source:HGNC Symbol;Acc:21397]                                     |
| 830 | ENSG00000101236 | 9616.429601 | -0.716327387 | 0.052192669 | 1.63E-41 | RNF24     | ring finger protein 24 [Source:HGNC Symbol;Acc:13779]                                                     |
| 831 | ENSG00000138688 | 7007.468691 | -0.836888127 | 0.061064568 | 2.14E-41 | KIAA1109  | KIAA1109 [Source:HGNC Symbol;Acc:26953]                                                                   |
| 832 | ENSG00000152078 | 171.1944529 | -3.739538021 | 0.273489163 | 3.29E-41 | TMEM56    | transmembrane protein 56 [Source:HGNC Symbol;Acc:26477]                                                   |
| 833 | ENSG00000229474 | 940.2872499 | 1.636099739  | 0.11965834  | 3.30E-41 | PATL2     | protein associated with topoisomerase II homolog 2 (yeast) [Source:HGNC Symbol;Acc:33630]                 |
| 834 | ENSG00000197579 | 1314.065523 | 1.379654723  | 0.100946002 | 3.57E-41 | TOPORS    | topoisomerase I binding, arginine/serine-rich, E3 ubiquitin protein ligase [Source:HGNC Symbol;Acc:21653] |

|     |                 |             |              |             |          |          |                                                                                                                              |
|-----|-----------------|-------------|--------------|-------------|----------|----------|------------------------------------------------------------------------------------------------------------------------------|
| 835 | ENSG00000128218 | 308.4759366 | 2.71016361   | 0.198383223 | 3.88E-41 | VPREB3   | pre-B lymphocyte 3 [Source:HGNC Symbol;Acc:12710]                                                                            |
| 836 | ENSG00000165102 | 2616.410585 | -1.127684347 | 0.082610651 | 4.48E-41 | HGSNAT   | heparan-alpha-glucosaminide N-acetyltransferase [Source:HGNC Symbol;Acc:26527]                                               |
| 837 | ENSG00000147604 | 14885.16611 | 0.744913121  | 0.054644774 | 5.78E-41 | RPL7     | ribosomal protein L7 [Source:HGNC Symbol;Acc:10363]                                                                          |
| 838 | ENSG00000171476 | 401.8058236 | 2.486518317  | 0.182422168 | 5.88E-41 | HOPX     | HOP homeobox [Source:HGNC Symbol;Acc:24961]                                                                                  |
| 839 | ENSG00000197958 | 8859.502834 | 0.690240864  | 0.05065464  | 6.22E-41 | RPL12    | ribosomal protein L12 [Source:HGNC Symbol;Acc:10302]                                                                         |
| 840 | ENSG00000230903 | 2999.658008 | 0.96262828   | 0.070664414 | 6.55E-41 | RPL9P8   | ribosomal protein L9 pseudogene 8 [Source:HGNC Symbol;Acc:30334]                                                             |
| 841 | ENSG00000237550 | 2999.500636 | 0.962017204  | 0.070632753 | 6.78E-41 | UBE2Q2P6 | ubiquitin-conjugating enzyme E2Q family member 2 pseudogene 6 [Source:HGNC Symbol;Acc:49412]                                 |
| 842 | ENSG00000128833 | 167.0540926 | 4.112998825  | 0.302058551 | 7.10E-41 | MYO5C    | myosin VC [Source:HGNC Symbol;Acc:7604]                                                                                      |
| 843 | ENSG00000019991 | 369.2355644 | -2.343137978 | 0.172401744 | 1.00E-40 | HGF      | hepatocyte growth factor (hepapoietin A; scatter factor) [Source:HGNC Symbol;Acc:4893]                                       |
| 844 | ENSG00000101493 | 3330.157997 | -1.096700094 | 0.080692865 | 1.00E-40 | ZNF516   | zinc finger protein 516 [Source:HGNC Symbol;Acc:28990]                                                                       |
| 845 | ENSG00000126787 | 225.0344428 | -3.247435917 | 0.239102721 | 1.14E-40 | DLGAP5   | discs, large (Drosophila) homolog-associated protein 5 [Source:HGNC Symbol;Acc:16864]                                        |
| 846 | ENSG00000170876 | 2927.627274 | 0.948114122  | 0.06986488  | 1.32E-40 | TMEM43   | transmembrane protein 43 [Source:HGNC Symbol;Acc:28472]                                                                      |
| 847 | ENSG00000165272 | 448.233077  | 2.560676711  | 0.188895846 | 1.61E-40 | AQP3     | aquaporin 3 (Gill blood group) [Source:HGNC Symbol;Acc:636]                                                                  |
| 848 | ENSG00000166401 | 747.9163264 | -1.72318709  | 0.127277    | 2.03E-40 | SERPINB8 | serpin peptidase inhibitor, clade B (ovalbumin), member 8 [Source:HGNC Symbol;Acc:8952]                                      |
| 849 | ENSG00000072135 | 5277.705433 | -0.801373297 | 0.059201102 | 2.10E-40 | PTPN18   | protein tyrosine phosphatase, non-receptor type 18 (brain-derived) [Source:HGNC Symbol;Acc:9649]                             |
| 850 | ENSG00000158517 | 11327.63068 | -0.704158431 | 0.052055849 | 2.39E-40 | NCF1     | neutrophil cytosolic factor 1 [Source:HGNC Symbol;Acc:7660]                                                                  |
| 851 | ENSG00000122223 | 725.0570583 | 1.752324507  | 0.129587983 | 2.54E-40 | CD244    | CD244 molecule, natural killer cell receptor 2B4 [Source:HGNC Symbol;Acc:18171]                                              |
| 852 | ENSG00000152818 | 2667.753154 | 1.097823723  | 0.081246452 | 2.91E-40 | UTRN     | utrophin [Source:HGNC Symbol;Acc:12635]                                                                                      |
| 853 | ENSG00000011426 | 517.8902598 | -2.16409679  | 0.160493565 | 4.26E-40 | ANLN     | anillin, actin binding protein [Source:HGNC Symbol;Acc:14082]                                                                |
| 854 | ENSG00000227715 | 15539.74306 | 0.71056053   | 0.052705184 | 4.39E-40 | HLA-A    | major histocompatibility complex, class I, A [Source:HGNC Symbol;Acc:4931]                                                   |
| 855 | ENSG00000116337 | 4534.958689 | 0.905110095  | 0.06716839  | 4.79E-40 | AMPD2    | adenosine monophosphate deaminase 2 [Source:HGNC Symbol;Acc:469]                                                             |
| 856 | ENSG00000137812 | 443.8319762 | -2.167766245 | 0.161152292 | 6.58E-40 | CASC5    | cancer susceptibility candidate 5 [Source:HGNC Symbol;Acc:24054]                                                             |
| 857 | ENSG00000156298 | 163.47657   | 5.715253609  | 0.424913878 | 6.69E-40 | TSPAN7   | tetraspanin 7 [Source:HGNC Symbol;Acc:11854]                                                                                 |
| 858 | ENSG00000108292 | 6106.255151 | 1.02129678   | 0.075983754 | 7.59E-40 | MLLT6    | myeloid/lymphoid or mixed-lineage leukemia (trithorax homolog, Drosophila); translocated to, 6 [Source:HGNC Symbol;Acc:7138] |
| 859 | ENSG00000092820 | 3090.107313 | 0.912458201  | 0.067896975 | 7.80E-40 | EZR      | ezrin [Source:HGNC Symbol;Acc:12691]                                                                                         |
| 860 | ENSG00000135596 | 9541.467412 | -0.860706138 | 0.064165898 | 1.09E-39 | MICAL1   | microtubule associated monooxygenase, calponin and LIM domain containing 1 [Source:HGNC Symbol;Acc:20619]                    |
| 861 | ENSG00000163508 | 349.9595178 | 2.688822548  | 0.200637139 | 1.29E-39 | EOMES    | eomesodermin [Source:HGNC Symbol;Acc:3372]                                                                                   |
| 862 | ENSG00000176890 | 887.563352  | -1.501699167 | 0.112164819 | 1.54E-39 | TYMS     | thymidylate synthetase [Source:HGNC Symbol;Acc:12441]                                                                        |

|     |                 |             |              |             |          |          |                                                                                            |
|-----|-----------------|-------------|--------------|-------------|----------|----------|--------------------------------------------------------------------------------------------|
| 863 | ENSG00000069493 | 2123.675689 | 1.1071076    | 0.082700882 | 1.56E-39 | CLEC2D   | C-type lectin domain family 2, member D [Source:HGNC Symbol;Acc:14351]                     |
| 864 | ENSG00000204136 | 721.0989107 | -1.661539791 | 0.124211361 | 1.79E-39 | GGTA1P   | glycoprotein, alpha-galactosyltransferase 1 pseudogene [Source:HGNC Symbol;Acc:4253]       |
| 865 | ENSG00000132749 | 695.6459146 | -1.784323562 | 0.133466703 | 1.98E-39 | MTL5     | metallothionein-like 5, testis-specific (tesmin) [Source:HGNC Symbol;Acc:7446]             |
| 866 | ENSG00000126860 | 3182.241183 | 0.96916918   | 0.072494347 | 1.99E-39 | EV12A    | ecotropic viral integration site 2A [Source:HGNC Symbol;Acc:3499]                          |
| 867 | ENSG00000242574 | 529.2466877 | 2.120943088  | 0.158676972 | 2.05E-39 | HLA-DMB  | major histocompatibility complex, class II, DM beta [Source:HGNC Symbol;Acc:4935]          |
| 868 | ENSG00000140988 | 12006.52326 | 0.88593621   | 0.066333811 | 2.36E-39 | RPS2     | ribosomal protein S2 [Source:HGNC Symbol;Acc:10404]                                        |
| 869 | ENSG00000213658 | 1159.733798 | 1.660342718  | 0.124368399 | 2.54E-39 | LAT      | linker for activation of T cells [Source:HGNC Symbol;Acc:18874]                            |
| 870 | ENSG00000165650 | 1621.453059 | -1.362005767 | 0.10205182  | 2.68E-39 | PDZD8    | PDZ domain containing 8 [Source:HGNC Symbol;Acc:26974]                                     |
| 871 | ENSG00000073331 | 3977.096584 | -1.045672814 | 0.078369881 | 2.80E-39 | ALPK1    | alpha-kinase 1 [Source:HGNC Symbol;Acc:20917]                                              |
| 872 | ENSG00000117399 | 297.4350288 | -2.761984901 | 0.207106403 | 3.06E-39 | CDC20    | cell division cycle 20 [Source:HGNC Symbol;Acc:1723]                                       |
| 873 | ENSG00000132475 | 25104.637   | 0.613188323  | 0.045985338 | 3.13E-39 | H3F3B    | H3 histone, family 3B (H3.3B) [Source:HGNC Symbol;Acc:4765]                                |
| 874 | ENSG00000128594 | 1882.163066 | -1.083042219 | 0.081300397 | 3.72E-39 | LRRC4    | leucine rich repeat containing 4 [Source:HGNC Symbol;Acc:15586]                            |
| 875 | ENSG00000122417 | 1380.081269 | 1.300502698  | 0.097684024 | 4.14E-39 | ODF2L    | outer dense fiber of sperm tails 2-like [Source:HGNC Symbol;Acc:29225]                     |
| 876 | ENSG00000104267 | 287.1413737 | -3.213534403 | 0.241526635 | 4.62E-39 | CA2      | carbonic anhydrase II [Source:HGNC Symbol;Acc:1373]                                        |
| 877 | ENSG00000178562 | 559.0969614 | 2.190536195  | 0.164659208 | 4.72E-39 | CD28     | CD28 molecule [Source:HGNC Symbol;Acc:1653]                                                |
| 878 | ENSG00000170160 | 1085.476197 | -1.553072208 | 0.116931323 | 6.28E-39 | CCDC144A | coiled-coil domain containing 144A [Source:HGNC Symbol;Acc:29072]                          |
| 879 | ENSG00000117586 | 248.5140809 | 3.00856795   | 0.226721212 | 7.37E-39 | TNFSF4   | tumor necrosis factor (ligand) superfamily, member 4 [Source:HGNC Symbol;Acc:11934]        |
| 880 | ENSG00000138829 | 716.614966  | -1.729414017 | 0.130333629 | 7.43E-39 | FBN2     | fibrillin 2 [Source:HGNC Symbol;Acc:3604]                                                  |
| 881 | ENSG00000076382 | 550.6428525 | -1.869501328 | 0.140891743 | 7.43E-39 | SPAG5    | sperm associated antigen 5 [Source:HGNC Symbol;Acc:13452]                                  |
| 882 | ENSG00000260501 | 8027.04097  | 0.717863472  | 0.054108664 | 7.62E-39 | RPL7A    | ribosomal protein L7a [Source:HGNC Symbol;Acc:10364]                                       |
| 883 | ENSG00000119138 | 318.7098413 | 2.752766658  | 0.207508323 | 7.74E-39 | KLF9     | Kruppel-like factor 9 [Source:HGNC Symbol;Acc:1123]                                        |
| 884 | ENSG00000178573 | 495.3098481 | 2.113747655  | 0.15938946  | 8.19E-39 | MAF      | v-maf avian musculoaponeurotic fibrosarcoma oncogene homolog [Source:HGNC Symbol;Acc:6776] |
| 885 | ENSG00000170315 | 9317.110304 | 0.745371773  | 0.056215601 | 8.44E-39 | UBB      | ubiquitin B [Source:HGNC Symbol;Acc:12463]                                                 |
| 886 | ENSG00000148303 | 8027.948388 | 0.717578744  | 0.054127382 | 8.66E-39 | RPL7A    | ribosomal protein L7a [Source:HGNC Symbol;Acc:10364]                                       |
| 887 | ENSG00000188322 | 364.6415694 | 2.559691501  | 0.193118277 | 8.96E-39 | SBK1     | SH3 domain binding kinase 1 [Source:HGNC Symbol;Acc:17699]                                 |
| 888 | ENSG00000007968 | 655.6029339 | -1.763078882 | 0.13304657  | 9.31E-39 | E2F2     | E2F transcription factor 2 [Source:HGNC Symbol;Acc:3114]                                   |
| 889 | ENSG00000271760 | 257.2426879 | -3.68316689  | 0.277985821 | 9.56E-39 | ADD2     | adducin 2 (beta) [Source:HGNC Symbol;Acc:244]                                              |
| 890 | ENSG00000075340 | 257.2565565 | -3.682935674 | 0.27799059  | 9.69E-39 | ADD2     | adducin 2 (beta) [Source:HGNC Symbol;Acc:244]                                              |

|     |                 |             |              |             |          |            |                                                                                                                   |
|-----|-----------------|-------------|--------------|-------------|----------|------------|-------------------------------------------------------------------------------------------------------------------|
| 891 | ENSG00000173171 | 4035.393972 | -0.973643674 | 0.073509099 | 1.01E-38 | MTX1       | metaxin 1 [Source:HGNC Symbol;Acc:7504]                                                                           |
| 892 | ENSG00000189067 | 20531.41296 | 0.632771055  | 0.047779173 | 1.03E-38 | LITAF      | lipopolysaccharide-induced TNF factor [Source:HGNC Symbol;Acc:16841]                                              |
| 893 | ENSG00000081237 | 18693.6829  | 0.670292193  | 0.050644058 | 1.15E-38 | PTPRC      | protein tyrosine phosphatase, receptor type, C [Source:HGNC Symbol;Acc:9666]                                      |
| 894 | ENSG00000163565 | 3370.279834 | 1.007369333  | 0.076137476 | 1.22E-38 | IFI16      | interferon, gamma-inducible protein 16 [Source:HGNC Symbol;Acc:5395]                                              |
| 895 | ENSG00000138160 | 539.5781194 | -1.905510788 | 0.144068101 | 1.29E-38 | KIF11      | kinesin family member 11 [Source:HGNC Symbol;Acc:6388]                                                            |
| 896 | ENSG00000142089 | 1586.984707 | 1.646253786  | 0.124715415 | 1.83E-38 | IFITM3     | interferon induced transmembrane protein 3 [Source:HGNC Symbol;Acc:5414]                                          |
| 897 | ENSG00000178980 | 902.52596   | 1.633314135  | 0.123804605 | 2.02E-38 | SEPW1      | selenoprotein W, 1 [Source:HGNC Symbol;Acc:10752]                                                                 |
| 898 | ENSG00000143537 | 2029.012519 | -1.326935421 | 0.100713375 | 2.53E-38 | ADAM15     | ADAM metalloproteinase domain 15 [Source:HGNC Symbol;Acc:193]                                                     |
| 899 | ENSG00000177084 | 2778.762755 | -1.031009292 | 0.0782567   | 2.55E-38 | POLE       | polymerase (DNA directed), epsilon, catalytic subunit [Source:HGNC Symbol;Acc:9177]                               |
| 900 | ENSG00000115085 | 2167.523195 | 2.873710651  | 0.218126541 | 2.56E-38 | ZAP70      | zeta-chain (TCR) associated protein kinase 70kDa [Source:HGNC Symbol;Acc:12858]                                   |
| 901 | ENSG00000230259 | 1626.685554 | -1.298736631 | 0.098590244 | 2.60E-38 | AC008738.1 |                                                                                                                   |
| 902 | ENSG00000132694 | 2944.9792   | -0.904117822 | 0.068667967 | 2.84E-38 | ARHGEF11   | Rho guanine nucleotide exchange factor (GEF) 11 [Source:HGNC Symbol;Acc:14580]                                    |
| 903 | ENSG00000187210 | 914.3095623 | -1.433334693 | 0.108869701 | 2.87E-38 | GCNT1      | glucosaminyl (N-acetyl) transferase 1, core 2 [Source:HGNC Symbol;Acc:4203]                                       |
| 904 | ENSG00000133985 | 458.4097668 | 2.267965619  | 0.172267386 | 2.87E-38 | TTC9       | tetratricopeptide repeat domain 9 [Source:HGNC Symbol;Acc:20267]                                                  |
| 905 | ENSG00000161405 | 343.8015473 | 2.784449015  | 0.211633355 | 3.21E-38 | IKZF3      | IKAROS family zinc finger 3 (Aiolos) [Source:HGNC Symbol;Acc:13178]                                               |
| 906 | ENSG00000221963 | 2095.965962 | 1.064649443  | 0.08093532  | 3.32E-38 | APOL6      | apolipoprotein L, 6 [Source:HGNC Symbol;Acc:14870]                                                                |
| 907 | ENSG00000125691 | 10542.88719 | 0.694128637  | 0.052770041 | 3.34E-38 | RPL23      | ribosomal protein L23 [Source:HGNC Symbol;Acc:10316]                                                              |
| 908 | ENSG00000197694 | 3734.286495 | 0.895056259  | 0.068059083 | 3.45E-38 | SPTAN1     | spectrin, alpha, non-erythrocytic 1 [Source:HGNC Symbol;Acc:11273]                                                |
| 909 | ENSG00000027869 | 280.1107479 | 2.850478841  | 0.216842318 | 3.72E-38 | SH2D2A     | SH2 domain containing 2A [Source:HGNC Symbol;Acc:10821]                                                           |
| 910 | ENSG00000010278 | 677.6043387 | 1.911178692  | 0.145509544 | 4.30E-38 | CD9        | CD9 molecule [Source:HGNC Symbol;Acc:1709]                                                                        |
| 911 | ENSG00000167419 | 254.039582  | -2.7801817   | 0.211772243 | 4.66E-38 | LPO        | lactoperoxidase [Source:HGNC Symbol;Acc:6678]                                                                     |
| 912 | ENSG00000198734 | 1627.291963 | -1.22386266  | 0.09323645  | 4.77E-38 | F5         | coagulation factor V (proaccelerin, labile factor) [Source:HGNC Symbol;Acc:3542]                                  |
| 913 | ENSG00000197249 | 19335.32287 | 0.613839515  | 0.046794042 | 5.33E-38 | SERPINA1   | serpin peptidase inhibitor, clade A (alpha-1 antiproteinase, antitrypsin), member 1 [Source:HGNC Symbol;Acc:8941] |
| 914 | ENSG00000077150 | 1643.798405 | 1.364555114  | 0.104110779 | 6.17E-38 | NFKB2      | nuclear factor of kappa light polypeptide gene enhancer in B-cells 2 (p49/p100) [Source:HGNC Symbol;Acc:7795]     |
| 915 | ENSG00000164116 | 236.5719942 | 3.272458588  | 0.249764069 | 6.54E-38 | GUCY1A3    | guanylate cyclase 1, soluble, alpha 3 [Source:HGNC Symbol;Acc:4685]                                               |
| 916 | ENSG00000092010 | 4241.178401 | 0.859648573  | 0.065725936 | 8.84E-38 | PSME1      | proteasome (prosome, macropain) activator subunit 1 (PA28 alpha) [Source:HGNC Symbol;Acc:9568]                    |
| 917 | ENSG00000143889 | 931.0618096 | -1.612619656 | 0.123367919 | 9.76E-38 | HNRNPLL    | heterogeneous nuclear ribonucleoprotein L-like [Source:HGNC Symbol;Acc:25127]                                     |
| 918 | ENSG00000171848 | 893.150824  | -1.639858699 | 0.125557364 | 1.13E-37 | RRM2       | ribonucleotide reductase M2 [Source:HGNC Symbol;Acc:10452]                                                        |

|     |                 |             |              |             |          |            |                                                                                                         |
|-----|-----------------|-------------|--------------|-------------|----------|------------|---------------------------------------------------------------------------------------------------------|
| 919 | ENSG00000204628 | 14193.13783 | 0.624559218  | 0.047822563 | 1.14E-37 | GNB2L1     | guanine nucleotide binding protein (G protein), beta polypeptide 2-like 1 [Source:HGNC Symbol;Acc:4399] |
| 920 | ENSG00000167470 | 3561.207919 | -1.06499586  | 0.081570083 | 1.19E-37 | MIDN       | midnolin [Source:HGNC Symbol;Acc:16298]                                                                 |
| 921 | ENSG00000131378 | 603.5025962 | 1.884665924  | 0.14438569  | 1.24E-37 | RFTN1      | raftlin, lipid raft linker 1 [Source:HGNC Symbol;Acc:30278]                                             |
| 922 | ENSG00000262970 | 693.6492284 | -2.257548309 | 0.173014576 | 1.32E-37 | ACER3      | alkaline ceramidase 3 [Source:HGNC Symbol;Acc:16066]                                                    |
| 923 | ENSG00000169432 | 384.6676686 | -2.231484251 | 0.171070106 | 1.39E-37 | SCN9A      | sodium channel, voltage-gated, type IX, alpha subunit [Source:HGNC Symbol;Acc:10597]                    |
| 924 | ENSG00000162434 | 10404.22205 | 0.68095209   | 0.052213741 | 1.44E-37 | JAK1       | Janus kinase 1 [Source:HGNC Symbol;Acc:6190]                                                            |
| 925 | ENSG00000254087 | 8588.021552 | 0.683885345  | 0.052441916 | 1.45E-37 | LYN        | v-yes-1 Yamaguchi sarcoma viral related oncogene homolog [Source:HGNC Symbol;Acc:6735]                  |
| 926 | ENSG00000083454 | 598.8339672 | 1.82742732   | 0.14017331  | 1.52E-37 | P2RX5      | purinergic receptor P2X, ligand-gated ion channel, 5 [Source:HGNC Symbol;Acc:8536]                      |
| 927 | ENSG00000183558 | 776.8075472 | -1.676213216 | 0.128633714 | 1.65E-37 | HIST2H2AA3 | histone cluster 2, H2aa3 [Source:HGNC Symbol;Acc:4736]                                                  |
| 928 | ENSG00000115091 | 11416.76631 | -0.689923069 | 0.052961634 | 1.74E-37 | ACTR3      | ARP3 actin-related protein 3 homolog (yeast) [Source:HGNC Symbol;Acc:170]                               |
| 929 | ENSG00000110700 | 7098.669313 | 0.819545973  | 0.062930155 | 1.82E-37 | RPS13      | ribosomal protein S13 [Source:HGNC Symbol;Acc:10386]                                                    |
| 930 | ENSG00000174282 | 1265.442767 | 1.320434201  | 0.10144024  | 1.97E-37 | ZBTB4      | zinc finger and BTB domain containing 4 [Source:HGNC Symbol;Acc:23847]                                  |
| 931 | ENSG00000117226 | 622.0406849 | 1.805228122  | 0.138756943 | 2.16E-37 | GBP3       | guanylate binding protein 3 [Source:HGNC Symbol;Acc:4184]                                               |
| 932 | ENSG00000157800 | 2780.994044 | -1.14394086  | 0.087963176 | 2.31E-37 | SLC37A3    | solute carrier family 37, member 3 [Source:HGNC Symbol;Acc:20651]                                       |
| 933 | ENSG00000271658 | 986.2905643 | -1.569097602 | 0.120657171 | 2.31E-37 | OSCAR      | osteoclast associated, immunoglobulin-like receptor [Source:HGNC Symbol;Acc:29960]                      |
| 934 | ENSG00000117228 | 1156.140069 | 1.420284498  | 0.109236347 | 2.39E-37 | GBP1       | guanylate binding protein 1, interferon-inducible [Source:HGNC Symbol;Acc:4182]                         |
| 935 | ENSG00000157823 | 1268.18551  | -1.259797775 | 0.096905291 | 2.44E-37 | AP3S2      | adaptor-related protein complex 3, sigma 2 subunit [Source:HGNC Symbol;Acc:571]                         |
| 936 | ENSG00000062282 | 2672.507377 | 1.146857736  | 0.088290111 | 2.80E-37 | DGAT2      | diacylglycerol O-acyltransferase 2 [Source:HGNC Symbol;Acc:16940]                                       |
| 937 | ENSG00000163534 | 1404.918896 | -1.174285121 | 0.090474675 | 3.21E-37 | FCRL1      | Fc receptor-like 1 [Source:HGNC Symbol;Acc:18509]                                                       |
| 938 | ENSG00000165458 | 3632.632864 | -0.831980692 | 0.064134527 | 3.50E-37 | INPPL1     | inositol polyphosphate phosphatase-like 1 [Source:HGNC Symbol;Acc:6080]                                 |
| 939 | ENSG00000109670 | 1762.436279 | 1.393296856  | 0.107406668 | 3.51E-37 | FBXW7      | F-box and WD repeat domain containing 7, E3 ubiquitin protein ligase [Source:HGNC Symbol;Acc:16712]     |
| 940 | ENSG00000145687 | 1237.11672  | 1.278819468  | 0.098638537 | 3.86E-37 | SSBP2      | single-stranded DNA binding protein 2 [Source:HGNC Symbol;Acc:15831]                                    |
| 941 | ENSG00000206560 | 1388.386446 | 1.357882319  | 0.10483432  | 4.51E-37 | ANKRD28    | ankyrin repeat domain 28 [Source:HGNC Symbol;Acc:29024]                                                 |
| 942 | ENSG00000114480 | 1011.512075 | -1.377289309 | 0.106398295 | 5.00E-37 | GBE1       | glucan (1,4-alpha-), branching enzyme 1 [Source:HGNC Symbol;Acc:4180]                                   |
| 943 | ENSG00000169991 | 545.7596564 | 2.213930775  | 0.171109106 | 5.40E-37 | IFFO2      | intermediate filament family orphan 2 [Source:HGNC Symbol;Acc:27006]                                    |
| 944 | ENSG00000071054 | 6005.111086 | -0.784750702 | 0.060696787 | 6.12E-37 | MAP4K4     | mitogen-activated protein kinase kinase kinase kinase 4 [Source:HGNC Symbol;Acc:6866]                   |
| 945 | ENSG00000038274 | 2894.439788 | 0.91119221   | 0.070495337 | 6.39E-37 | MAT2B      | methionine adenosyltransferase II, beta [Source:HGNC Symbol;Acc:6905]                                   |
| 946 | ENSG00000166851 | 340.4231135 | -2.465184914 | 0.190754029 | 6.57E-37 | PLK1       | polo-like kinase 1 [Source:HGNC Symbol;Acc:9077]                                                        |



|     |                 |             |              |             |          |         |                                                                                         |
|-----|-----------------|-------------|--------------|-------------|----------|---------|-----------------------------------------------------------------------------------------|
| 947 | ENSG00000068971 | 791.3482893 | -1.538195482 | 0.119083225 | 7.13E-37 | PPP2R5B | protein phosphatase 2, regulatory subunit B', beta [Source:HGNC Symbol;Acc:9310]        |
| 948 | ENSG00000270784 | 307.9162009 | 2.97762171   | 0.230527493 | 7.17E-37 | CRIP1   | cysteine-rich protein 1 (intestinal) [Source:HGNC Symbol;Acc:2360]                      |
| 949 | ENSG00000134802 | 936.7415987 | -1.481158612 | 0.114683436 | 7.29E-37 | SLC43A3 | solute carrier family 43, member 3 [Source:HGNC Symbol;Acc:17466]                       |
| 950 | ENSG00000137767 | 2560.349076 | -0.953936323 | 0.07388276  | 7.64E-37 | SQRDL   | sulfide quinone reductase-like (yeast) [Source:HGNC Symbol;Acc:20390]                   |
| 951 | ENSG00000181847 | 555.8802088 | 2.124812588  | 0.164616083 | 8.02E-37 | TIGIT   | T cell immunoreceptor with Ig and ITIM domains [Source:HGNC Symbol;Acc:26838]           |
| 952 | ENSG00000182095 | 2069.167446 | -1.052878267 | 0.081583791 | 8.24E-37 | TNRC18  | trinucleotide repeat containing 18 [Source:HGNC Symbol;Acc:11962]                       |
| 953 | ENSG00000023902 | 1176.535272 | 1.37621078   | 0.106640882 | 8.27E-37 | PLEKHO1 | pleckstrin homology domain containing, family O member 1 [Source:HGNC Symbol;Acc:24310] |
| 954 | ENSG00000112419 | 963.0784896 | -1.754445742 | 0.135967463 | 8.45E-37 | PHACTR2 | phosphatase and actin regulator 2 [Source:HGNC Symbol;Acc:20956]                        |
| 955 | ENSG00000116717 | 902.8487548 | -1.484199047 | 0.115047884 | 8.74E-37 | GADD45A | growth arrest and DNA-damage-inducible, alpha [Source:HGNC Symbol;Acc:4095]             |
| 956 | ENSG00000213145 | 308.3052875 | 2.967439267  | 0.230087772 | 9.16E-37 | CRIP1   | cysteine-rich protein 1 (intestinal) [Source:HGNC Symbol;Acc:2360]                      |
| 957 | ENSG00000197993 | 119.220855  | -4.380540998 | 0.33999547  | 1.08E-36 | KEL     | Kell blood group, metallo-endopeptidase [Source:HGNC Symbol;Acc:6308]                   |
| 958 | ENSG00000153283 | 1241.436476 | 1.569670648  | 0.121888126 | 1.17E-36 | CD96    | CD96 molecule [Source:HGNC Symbol;Acc:16892]                                            |
| 959 | ENSG00000166949 | 875.0022103 | 1.574102632  | 0.122552368 | 1.81E-36 | SMAD3   | SMAD family member 3 [Source:HGNC Symbol;Acc:6769]                                      |
| 960 | ENSG00000074966 | 543.8466385 | 1.997159216  | 0.155491269 | 1.81E-36 | TXK     | TXK tyrosine kinase [Source:HGNC Symbol;Acc:12434]                                      |
| 961 | ENSG00000198624 | 3535.935921 | 0.88050001   | 0.068603714 | 2.04E-36 | CCDC69  | coiled-coil domain containing 69 [Source:HGNC Symbol;Acc:24487]                         |
| 962 | ENSG00000129355 | 3172.875055 | -0.98291134  | 0.076596353 | 2.10E-36 | CDKN2D  | cyclin-dependent kinase inhibitor 2D (p19, inhibits CDK4) [Source:HGNC Symbol;Acc:1790] |
| 963 | ENSG00000141293 | 503.1296081 | 2.222707705  | 0.173352917 | 2.40E-36 | SKAP1   | src kinase associated phosphoprotein 1 [Source:HGNC Symbol;Acc:15605]                   |
| 964 | ENSG00000269216 | 111.0857855 | -5.720509257 | 0.446157113 | 2.41E-36 | CLTCL1  |                                                                                         |
| 965 | ENSG00000141098 | 1185.905189 | -1.388129601 | 0.108350783 | 2.74E-36 | GFOD2   | glucose-fructose oxidoreductase domain containing 2 [Source:HGNC Symbol;Acc:28159]      |
| 966 | ENSG00000174944 | 248.4326013 | 3.163177362  | 0.246921894 | 2.78E-36 | P2RY14  | purinergic receptor P2Y, G-protein coupled, 14 [Source:HGNC Symbol;Acc:16442]           |
| 967 | ENSG00000197329 | 5072.340446 | 0.831883251  | 0.064938305 | 2.78E-36 | PELI1   | pellino E3 ubiquitin protein ligase 1 [Source:HGNC Symbol;Acc:8827]                     |
| 968 | ENSG00000114942 | 5404.016356 | 0.841461466  | 0.065718656 | 3.01E-36 | EEF1B2  | eukaryotic translation elongation factor 1 beta 2 [Source:HGNC Symbol;Acc:3208]         |
| 969 | ENSG00000184293 | 209.1530697 | 3.243491623  | 0.253825105 | 4.18E-36 | CLECL1  | C-type lectin-like 1 [Source:HGNC Symbol;Acc:24462]                                     |
| 970 | ENSG00000143753 | 1528.584471 | -1.114967917 | 0.087270464 | 4.31E-36 | DEGS1   | delta(4)-desaturase, sphingolipid 1 [Source:HGNC Symbol;Acc:13709]                      |
| 971 | ENSG00000136869 | 2086.934183 | 1.087999693  | 0.085262862 | 5.25E-36 | TLR4    | toll-like receptor 4 [Source:HGNC Symbol;Acc:11850]                                     |
| 972 | ENSG00000223609 | 860.795709  | -1.417149606 | 0.111247543 | 6.94E-36 | HBD     | hemoglobin, delta [Source:HGNC Symbol;Acc:4829]                                         |
| 973 | ENSG00000205809 | 234.591787  | 3.249272844  | 0.255130047 | 7.20E-36 | KLRC2   | killer cell lectin-like receptor subfamily C, member 2 [Source:HGNC Symbol;Acc:6375]    |
| 974 | ENSG00000139190 | 3963.327345 | -0.801481539 | 0.062946433 | 7.47E-36 | VAMP1   | vesicle-associated membrane protein 1 (synaptobrevin 1) [Source:HGNC Symbol;Acc:12642]  |

|      |                 |             |              |             |          |           |                                                                                                                              |
|------|-----------------|-------------|--------------|-------------|----------|-----------|------------------------------------------------------------------------------------------------------------------------------|
| 975  | ENSG00000123643 | 2283.482971 | -1.089589173 | 0.085673519 | 9.02E-36 | SLC36A1   | solute carrier family 36 (proton/amino acid symporter), member 1 [Source:HGNC Symbol;Acc:18761]                              |
| 976  | ENSG00000165646 | 815.9948277 | -1.519613257 | 0.11960789  | 1.06E-35 | SLC18A2   | solute carrier family 18 (vesicular monoamine transporter), member 2 [Source:HGNC Symbol;Acc:10935]                          |
| 977  | ENSG00000166313 | 294.3453368 | 2.756354523  | 0.216964437 | 1.07E-35 | APBB1     | amyloid beta (A4) precursor protein-binding, family B, member 1 (Fe65) [Source:HGNC Symbol;Acc:581]                          |
| 978  | ENSG00000172005 | 299.5420449 | 2.622861336  | 0.206497379 | 1.11E-35 | MAL       | mal, T-cell differentiation protein [Source:HGNC Symbol;Acc:6817]                                                            |
| 979  | ENSG00000113303 | 2219.278528 | -1.068539068 | 0.084148088 | 1.15E-35 | BTNL8     | butyrophilin-like 8 [Source:HGNC Symbol;Acc:26131]                                                                           |
| 980  | ENSG00000110203 | 1340.515683 | -1.369113408 | 0.107974638 | 1.46E-35 | FOLR3     | folate receptor 3 (gamma) [Source:HGNC Symbol;Acc:3795]                                                                      |
| 981  | ENSG00000171522 | 640.6700007 | 1.882962163  | 0.148611748 | 1.65E-35 | PTGER4    | prostaglandin E receptor 4 (subtype EP4) [Source:HGNC Symbol;Acc:9596]                                                       |
| 982  | ENSG00000106366 | 125.7847875 | 4.695113806  | 0.371172919 | 2.15E-35 | SERPINE1  | serpin peptidase inhibitor, clade E (nexin, plasminogen activator inhibitor type 1), member 1 [Source:HGNC Symbol;Acc:8583]  |
| 983  | ENSG00000172673 | 348.1614985 | 2.513742914  | 0.198778252 | 2.24E-35 | THEMIS    | thymocyte selection associated [Source:HGNC Symbol;Acc:21569]                                                                |
| 984  | ENSG00000124788 | 2348.581885 | -1.042692785 | 0.082459331 | 2.27E-35 | ATXN1     | ataxin 1 [Source:HGNC Symbol;Acc:10548]                                                                                      |
| 985  | ENSG00000169299 | 1356.934579 | -1.202557889 | 0.095201357 | 2.68E-35 | PGM2      | phosphoglucomutase 2 [Source:HGNC Symbol;Acc:8906]                                                                           |
| 986  | ENSG00000163412 | 2466.824778 | -0.970579099 | 0.076876597 | 2.91E-35 | EIF4E3    | eukaryotic translation initiation factor 4E family member 3 [Source:HGNC Symbol;Acc:31837]                                   |
| 987  | ENSG00000235744 | 271.903822  | 2.745548777  | 0.217692259 | 3.44E-35 | HLA-DOA   | major histocompatibility complex, class II, DO alpha [Source:HGNC Symbol;Acc:4936]                                           |
| 988  | ENSG00000231558 | 271.8996875 | 2.745446284  | 0.217699247 | 3.47E-35 | HLA-DOA   | major histocompatibility complex, class II, DO alpha [Source:HGNC Symbol;Acc:4936]                                           |
| 989  | ENSG00000107485 | 248.8917048 | 2.976946371  | 0.236127553 | 3.64E-35 | GATA3     | GATA binding protein 3 [Source:HGNC Symbol;Acc:4172]                                                                         |
| 990  | ENSG00000173535 | 5697.195297 | 0.745261389  | 0.059130107 | 3.81E-35 | TNFRSF10C | tumor necrosis factor receptor superfamily, member 10c, decoy without an intracellular domain [Source:HGNC Symbol;Acc:11906] |
| 991  | ENSG00000160180 | 370.027671  | -2.348515006 | 0.186401994 | 4.03E-35 | TFF3      | trefoil factor 3 (intestinal) [Source:HGNC Symbol;Acc:11757]                                                                 |
| 992  | ENSG00000204169 | 363.6502223 | 2.521127608  | 0.200127066 | 4.10E-35 | AGAP7     | ArfGAP with GTPase domain, ankyrin repeat and PH domain 7 [Source:HGNC Symbol;Acc:23465]                                     |
| 993  | ENSG00000264204 | 363.5109186 | 2.5211154    | 0.200150125 | 4.18E-35 | AGAP7     | ArfGAP with GTPase domain, ankyrin repeat and PH domain 7 [Source:HGNC Symbol;Acc:23465]                                     |
| 994  | ENSG00000064012 | 5534.166211 | 0.866037728  | 0.06875841  | 4.22E-35 | CASP8     | caspase 8, apoptosis-related cysteine peptidase [Source:HGNC Symbol;Acc:1509]                                                |
| 995  | ENSG00000028277 | 1357.734634 | 1.410922173  | 0.112090803 | 4.66E-35 | POU2F2    | POU class 2 homeobox 2 [Source:HGNC Symbol;Acc:9213]                                                                         |
| 996  | ENSG00000198901 | 859.3234714 | -1.790480542 | 0.142383512 | 5.44E-35 | PRC1      | protein regulator of cytokinesis 1 [Source:HGNC Symbol;Acc:9341]                                                             |
| 997  | ENSG00000180509 | 506.6134129 | -1.899069277 | 0.151329517 | 7.53E-35 | KCNE1     | potassium voltage-gated channel, Isk-related family, member 1 [Source:HGNC Symbol;Acc:6240]                                  |
| 998  | ENSG00000106772 | 378.4563599 | -2.146313092 | 0.17106822  | 7.79E-35 | PRUNE2    | prune homolog 2 (Drosophila) [Source:HGNC Symbol;Acc:25209]                                                                  |
| 999  | ENSG00000187116 | 1754.239419 | -1.0379955   | 0.082819638 | 9.20E-35 | LILRA5    | leukocyte immunoglobulin-like receptor, subfamily A (with TM domain), member 5 [Source:HGNC Symbol;Acc:16309]                |
| 1000 | ENSG00000197262 | 307.7946435 | 2.813361365  | 0.224485949 | 9.28E-35 | CCL4L2    | chemokine (C-C motif) ligand 4-like 2 [Source:HGNC Symbol;Acc:24066]                                                         |
| 1001 | ENSG00000172081 | 8345.011613 | 0.714464117  | 0.057041413 | 1.01E-34 | MOB3A     | MOB kinase activator 3A [Source:HGNC Symbol;Acc:29802]                                                                       |
| 1002 | ENSG00000134531 | 147.0693615 | 4.718870326  | 0.376773839 | 1.03E-34 | EMP1      | epithelial membrane protein 1 [Source:HGNC Symbol;Acc:3333]                                                                  |

|      |                 |             |              |             |          |                |                                                                                                               |
|------|-----------------|-------------|--------------|-------------|----------|----------------|---------------------------------------------------------------------------------------------------------------|
| 1003 | ENSG00000262800 | 1755.234004 | -1.037687095 | 0.082859982 | 1.04E-34 | LILRA5         | leukocyte immunoglobulin-like receptor, subfamily A (with TM domain), member 5 [Source:HGNC Symbol;Acc:16309] |
| 1004 | ENSG00000119321 | 4066.469127 | -0.782260635 | 0.062464307 | 1.04E-34 | FKBP15         | FK506 binding protein 15, 133kDa [Source:HGNC Symbol;Acc:23397]                                               |
| 1005 | ENSG00000144283 | 1157.387911 | -1.459251024 | 0.116602771 | 1.15E-34 | PKP4           | plakophilin 4 [Source:HGNC Symbol;Acc:9026]                                                                   |
| 1006 | ENSG00000155363 | 924.2368192 | 1.540244202  | 0.123178015 | 1.32E-34 | MOV10          | Mov10, Moloney leukemia virus 10, homolog (mouse) [Source:HGNC Symbol;Acc:7200]                               |
| 1007 | ENSG00000197943 | 4418.565827 | -0.88540871  | 0.07080949  | 1.32E-34 | PLCG2          | phospholipase C, gamma 2 (phosphatidylinositol-specific) [Source:HGNC Symbol;Acc:9066]                        |
| 1008 | ENSG00000120885 | 457.1294933 | 2.058330724  | 0.164651227 | 1.37E-34 | CLU            | clusterin [Source:HGNC Symbol;Acc:2095]                                                                       |
| 1009 | ENSG00000099246 | 2549.993397 | -0.961753524 | 0.076949178 | 1.41E-34 | RAB18          | RAB18, member RAS oncogene family [Source:HGNC Symbol;Acc:14244]                                              |
| 1010 | ENSG00000189343 | 2550.616012 | 0.917561639  | 0.073430377 | 1.46E-34 | RPS2P46        | ribosomal protein S2 pseudogene 46 [Source:HGNC Symbol;Acc:35839]                                             |
| 1011 | ENSG00000187838 | 503.8947217 | 2.00522636   | 0.160661102 | 1.75E-34 | TMEM256-PLSCR3 | TMEM256-PLSCR3 readthrough (NMD candidate) [Source:HGNC Symbol;Acc:49186]                                     |
| 1012 | ENSG00000164251 | 875.0280728 | 1.582964763  | 0.126909516 | 1.93E-34 | F2RL1          | coagulation factor II (thrombin) receptor-like 1 [Source:HGNC Symbol;Acc:3538]                                |
| 1013 | ENSG00000139289 | 333.2315225 | -2.303346315 | 0.18474461  | 2.07E-34 | PHLDA1         | pleckstrin homology-like domain, family A, member 1 [Source:HGNC Symbol;Acc:8933]                             |
| 1014 | ENSG00000268916 | 100.9172375 | 5.715524112  | 0.458562698 | 2.17E-34 | CSAG2          | Homo sapiens CSAG family, member 2 (CSAG2), transcript variant 2, mRNA. [Source:RefSeq mRNA;Acc:NM_004909]    |
| 1015 | ENSG00000089693 | 4098.142088 | -0.811677482 | 0.065182303 | 2.50E-34 | MLF2           | myeloid leukemia factor 2 [Source:HGNC Symbol;Acc:7126]                                                       |
| 1016 | ENSG00000236882 | 583.3262765 | -1.715331319 | 0.137915548 | 3.01E-34 | C5orf27        | chromosome 5 open reading frame 27 [Source:HGNC Symbol;Acc:24687]                                             |
| 1017 | ENSG00000163606 | 513.493676  | -1.857915369 | 0.149603429 | 3.80E-34 | CD200R1        | CD200 receptor 1 [Source:HGNC Symbol;Acc:24235]                                                               |
| 1018 | ENSG00000120690 | 3107.515117 | 0.915049693  | 0.073719753 | 4.11E-34 | ELF1           | E74-like factor 1 (ets domain transcription factor) [Source:HGNC Symbol;Acc:3316]                             |
| 1019 | ENSG00000147905 | 740.0069774 | 1.622542452  | 0.130740924 | 4.22E-34 | ZCCHC7         | zinc finger, CCHC domain containing 7 [Source:HGNC Symbol;Acc:26209]                                          |
| 1020 | ENSG00000099194 | 1231.729108 | -1.291080937 | 0.104040888 | 4.27E-34 | SCD            | stearoyl-CoA desaturase (delta-9-desaturase) [Source:HGNC Symbol;Acc:10571]                                   |
| 1021 | ENSG00000115129 | 569.6628695 | -1.827962303 | 0.147412581 | 4.77E-34 | TP53I3         | tumor protein p53 inducible protein 3 [Source:HGNC Symbol;Acc:19373]                                          |
| 1022 | ENSG00000152784 | 506.1210919 | 2.607897066  | 0.210408565 | 5.13E-34 | PRDM8          | PR domain containing 8 [Source:HGNC Symbol;Acc:13993]                                                         |
| 1023 | ENSG00000156804 | 243.6614804 | 3.061475388  | 0.247068646 | 5.34E-34 | FBXO32         | F-box protein 32 [Source:HGNC Symbol;Acc:16731]                                                               |
| 1024 | ENSG00000159618 | 443.8993005 | 2.542484024  | 0.205313038 | 5.87E-34 | GPR114         | G protein-coupled receptor 114 [Source:HGNC Symbol;Acc:19010]                                                 |
| 1025 | ENSG00000272414 | 572.4791385 | -1.725435109 | 0.139366668 | 6.08E-34 | FAM47E-STBD1   | uncharacterized protein LOC100631383 [Source:RefSeq peptide;Acc:NP_001229868]                                 |
| 1026 | ENSG00000105612 | 580.6255493 | 1.891476394  | 0.152789814 | 6.15E-34 | DNASE2         | deoxyribonuclease II, lysosomal [Source:HGNC Symbol;Acc:2960]                                                 |
| 1027 | ENSG00000142185 | 1455.990752 | -1.831318842 | 0.147991    | 6.54E-34 | TRPM2          | transient receptor potential cation channel, subfamily M, member 2 [Source:HGNC Symbol;Acc:12339]             |
| 1028 | ENSG00000108798 | 388.9841901 | 2.363328204  | 0.191072625 | 7.02E-34 | ABI3           | ABI family, member 3 [Source:HGNC Symbol;Acc:29859]                                                           |
| 1029 | ENSG00000182670 | 2071.423374 | 1.073984702  | 0.086907683 | 8.04E-34 | TTC3           | tetratricopeptide repeat domain 3 [Source:HGNC Symbol;Acc:12393]                                              |
| 1030 | ENSG00000185585 | 150.7118265 | 3.675556334  | 0.297688349 | 9.19E-34 | OLFML2A        | olfactomedin-like 2A [Source:HGNC Symbol;Acc:27270]                                                           |

|      |                 |             |              |             |          |            |                                                                                                                                             |
|------|-----------------|-------------|--------------|-------------|----------|------------|---------------------------------------------------------------------------------------------------------------------------------------------|
| 1031 | ENSG00000088832 | 9311.992671 | -0.718821688 | 0.058228053 | 9.42E-34 | FKBP1A     | FK506 binding protein 1A, 12kDa [Source:HGNC Symbol;Acc:3711]                                                                               |
| 1032 | ENSG00000196576 | 674.1083747 | 2.070127679  | 0.167781975 | 1.02E-33 | PLXNB2     | plexin B2 [Source:HGNC Symbol;Acc:9104]                                                                                                     |
| 1033 | ENSG00000096996 | 523.9707579 | 1.945909533  | 0.15771828  | 1.03E-33 | IL12RB1    | interleukin 12 receptor, beta 1 [Source:HGNC Symbol;Acc:5971]                                                                               |
| 1034 | ENSG00000070614 | 2541.956309 | -1.121637924 | 0.090948162 | 1.09E-33 | NDST1      | N-deacetylase/N-sulfotransferase (heparan glucosaminyl) 1 [Source:HGNC Symbol;Acc:7680]                                                     |
| 1035 | ENSG00000152795 | 5888.670747 | 0.7953792    | 0.06459463  | 1.39E-33 | HNRNPDL    | heterogeneous nuclear ribonucleoprotein D-like [Source:HGNC Symbol;Acc:5037]                                                                |
| 1036 | ENSG0000004939  | 614.5264647 | -1.715207857 | 0.139316127 | 1.42E-33 | SLC4A1     | solute carrier family 4 (anion exchanger), member 1 (Diego blood group) [Source:HGNC Symbol;Acc:11027]                                      |
| 1037 | ENSG00000122642 | 598.9801563 | -1.864129463 | 0.151677232 | 1.85E-33 | FKBP9      | FK506 binding protein 9, 63 kDa [Source:HGNC Symbol;Acc:3725]                                                                               |
| 1038 | ENSG00000100346 | 239.8702896 | 3.159663612  | 0.257144227 | 1.91E-33 | CACNA1I    | calcium channel, voltage-dependent, T type, alpha 1I subunit [Source:HGNC Symbol;Acc:1396]                                                  |
| 1039 | ENSG00000169403 | 7360.232413 | 0.653935907  | 0.053221935 | 1.92E-33 | PTAFR      | platelet-activating factor receptor [Source:HGNC Symbol;Acc:9582]                                                                           |
| 1040 | ENSG00000160408 | 766.0835067 | 1.76469995   | 0.143709389 | 2.10E-33 | ST6GALNAC6 | ST6 (alpha-N-acetyl-neuraminy-2,3-beta-galactosyl-1,3)-N-acetylgalactosaminide alpha-2,6-sialyltransferase 6 [Source:HGNC Symbol;Acc:23364] |
| 1041 | ENSG00000197535 | 3277.556807 | -0.894370489 | 0.072838576 | 2.12E-33 | MYO5A      | myosin VA (heavy chain 12, myoxin) [Source:HGNC Symbol;Acc:7602]                                                                            |
| 1042 | ENSG00000265681 | 11872.62881 | 0.648628452  | 0.052836423 | 2.18E-33 | RPL17      | ribosomal protein L17 [Source:HGNC Symbol;Acc:10307]                                                                                        |
| 1043 | ENSG00000111696 | 721.5743456 | -1.721404839 | 0.140223989 | 2.18E-33 | NT5DC3     | 5'-nucleotidase domain containing 3 [Source:HGNC Symbol;Acc:30826]                                                                          |
| 1044 | ENSG00000170312 | 343.6273131 | -2.214555254 | 0.180396154 | 2.18E-33 | CDK1       | cyclin-dependent kinase 1 [Source:HGNC Symbol;Acc:1722]                                                                                     |
| 1045 | ENSG00000172197 | 1467.94942  | -1.085263975 | 0.088428534 | 2.27E-33 | MBOAT1     | membrane bound O-acyltransferase domain containing 1 [Source:HGNC Symbol;Acc:21579]                                                         |
| 1046 | ENSG00000148841 | 2913.27207  | -0.850272816 | 0.069309606 | 2.41E-33 | ITPRIP     | inositol 1,4,5-trisphosphate receptor interacting protein [Source:HGNC Symbol;Acc:29370]                                                    |
| 1047 | ENSG00000116251 | 5922.353766 | 0.738824722  | 0.060270778 | 2.71E-33 | RPL22      | ribosomal protein L22 [Source:HGNC Symbol;Acc:10315]                                                                                        |
| 1048 | ENSG00000167105 | 407.5816643 | -2.15120268  | 0.175507671 | 2.75E-33 | TMEM92     | transmembrane protein 92 [Source:HGNC Symbol;Acc:26579]                                                                                     |
| 1049 | ENSG00000087074 | 4140.481584 | -0.749691647 | 0.061173978 | 2.82E-33 | PPP1R15A   | protein phosphatase 1, regulatory subunit 15A [Source:HGNC Symbol;Acc:14375]                                                                |
| 1050 | ENSG00000079246 | 7153.902024 | -0.722102898 | 0.058970864 | 3.18E-33 | XRCC5      | X-ray repair complementing defective repair in Chinese hamster cells 5 (double-strand-break rejoining) [Source:HGNC Symbol;Acc:12833]       |
| 1051 | ENSG00000084110 | 3523.146918 | 0.871953538  | 0.07131961  | 4.02E-33 | HAL        | histidine ammonia-lyase [Source:HGNC Symbol;Acc:4806]                                                                                       |
| 1052 | ENSG00000079805 | 6601.659324 | -0.830819512 | 0.067962403 | 4.08E-33 | DNM2       | dynamitin 2 [Source:HGNC Symbol;Acc:2974]                                                                                                   |
| 1053 | ENSG00000124508 | 675.7307063 | 1.756503395  | 0.143698493 | 4.14E-33 | BTN2A2     | butyrophilin, subfamily 2, member A2 [Source:HGNC Symbol;Acc:1137]                                                                          |
| 1054 | ENSG00000243716 | 7299.559541 | -0.671279771 | 0.054943144 | 4.44E-33 | NPIP5      | nuclear pore complex interacting protein family, member B5 [Source:HGNC Symbol;Acc:37233]                                                   |
| 1055 | ENSG00000008513 | 2285.183321 | 0.986311049  | 0.080739287 | 4.53E-33 | ST3GAL1    | ST3 beta-galactoside alpha-2,3-sialyltransferase 1 [Source:HGNC Symbol;Acc:10862]                                                           |
| 1056 | ENSG00000129467 | 882.5468226 | -1.461529397 | 0.119741594 | 5.14E-33 | ADCY4      | adenylate cyclase 4 [Source:HGNC Symbol;Acc:235]                                                                                            |
| 1057 | ENSG00000112773 | 2999.586709 | -0.859492787 | 0.0704192   | 5.15E-33 | FAM46A     | family with sequence similarity 46, member A [Source:HGNC Symbol;Acc:18345]                                                                 |
| 1058 | ENSG00000096060 | 1825.61583  | 1.155899415  | 0.09473182  | 5.38E-33 | FKBP5      | FK506 binding protein 5 [Source:HGNC Symbol;Acc:3721]                                                                                       |

|      |                 |             |              |             |          |            |                                                                                    |
|------|-----------------|-------------|--------------|-------------|----------|------------|------------------------------------------------------------------------------------|
| 1059 | ENSG00000160211 | 5145.271784 | -1.075674617 | 0.08826954  | 6.50E-33 | G6PD       | glucose-6-phosphate dehydrogenase [Source:HGNC Symbol;Acc:4057]                    |
| 1060 | ENSG00000151135 | 379.9870477 | 2.109003365  | 0.173162592 | 7.07E-33 | C12orf23   | chromosome 12 open reading frame 23 [Source:HGNC Symbol;Acc:28281]                 |
| 1061 | ENSG00000102837 | 962.7672092 | -1.319590959 | 0.108410276 | 7.71E-33 | OLFM4      | olfactomedin 4 [Source:HGNC Symbol;Acc:17190]                                      |
| 1062 | ENSG00000188636 | 346.2756889 | 2.256403833  | 0.185470291 | 8.33E-33 | LDOC1L     | leucine zipper, down-regulated in cancer 1-like [Source:HGNC Symbol;Acc:13343]     |
| 1063 | ENSG00000114021 | 1460.089572 | -1.14419449  | 0.094069443 | 8.58E-33 | NIT2       | nitrilase family, member 2 [Source:HGNC Symbol;Acc:29878]                          |
| 1064 | ENSG00000171314 | 5641.687471 | -0.732892482 | 0.060280122 | 9.14E-33 | PGAM1      | phosphoglycerate mutase 1 (brain) [Source:HGNC Symbol;Acc:8888]                    |
| 1065 | ENSG00000065809 | 6113.218719 | -0.679647754 | 0.055916559 | 9.52E-33 | FAM107B    | family with sequence similarity 107, member B [Source:HGNC Symbol;Acc:23726]       |
| 1066 | ENSG00000169714 | 6663.645607 | 0.688802284  | 0.056693408 | 1.01E-32 | CNBP       | CCHC-type zinc finger, nucleic acid binding protein [Source:HGNC Symbol;Acc:13164] |
| 1067 | ENSG00000163519 | 277.558613  | 2.731758664  | 0.224876724 | 1.03E-32 | TRAT1      | T cell receptor associated transmembrane adaptor 1 [Source:HGNC Symbol;Acc:30698]  |
| 1068 | ENSG00000262418 | 13102.19111 | 0.602627663  | 0.049615869 | 1.06E-32 | PTPRC      | protein tyrosine phosphatase, receptor type, C [Source:HGNC Symbol;Acc:9666]       |
| 1069 | ENSG00000166147 | 433.9902109 | -2.073865239 | 0.170963824 | 1.28E-32 | FBN1       | fibrillin 1 [Source:HGNC Symbol;Acc:3603]                                          |
| 1070 | ENSG00000143384 | 34255.72346 | 0.565081609  | 0.046628688 | 1.47E-32 | MCL1       | myeloid cell leukemia sequence 1 (BCL2-related) [Source:HGNC Symbol;Acc:6943]      |
| 1071 | ENSG00000132464 | 185.7926657 | 3.233246953  | 0.266832128 | 1.50E-32 | ENAM       | enamelin [Source:HGNC Symbol;Acc:3344]                                             |
| 1072 | ENSG00000156970 | 414.746451  | -2.01956412  | 0.166677302 | 1.51E-32 | BUB1B      | BUB1 mitotic checkpoint serine/threonine kinase B [Source:HGNC Symbol;Acc:1149]    |
| 1073 | ENSG00000119900 | 10865.54076 | 0.743373396  | 0.061384323 | 1.63E-32 | OGFRL1     | opioid growth factor receptor-like 1 [Source:HGNC Symbol;Acc:21378]                |
| 1074 | ENSG00000162444 | 1356.368456 | -1.138351166 | 0.094138845 | 2.02E-32 | RBP7       | retinol binding protein 7, cellular [Source:HGNC Symbol;Acc:30316]                 |
| 1075 | ENSG00000071564 | 954.2505561 | 1.340429998  | 0.111089187 | 2.77E-32 | TCF3       | transcription factor 3 [Source:HGNC Symbol;Acc:11633]                              |
| 1076 | ENSG00000180316 | 331.212968  | -2.254632503 | 0.186945587 | 2.97E-32 | PNPLA1     | patatin-like phospholipase domain containing 1 [Source:HGNC Symbol;Acc:21246]      |
| 1077 | ENSG00000196656 | 5454.038009 | 0.679435715  | 0.056348562 | 3.07E-32 | AC004057.1 |                                                                                    |
| 1078 | ENSG00000169174 | 128.0580809 | -3.94442174  | 0.327182912 | 3.14E-32 | PCSK9      | proprotein convertase subtilisin/kexin type 9 [Source:HGNC Symbol;Acc:20001]       |
| 1079 | ENSG00000156026 | 1675.750289 | -1.238295484 | 0.102771913 | 3.41E-32 | MCU        | mitochondrial calcium uniporter [Source:HGNC Symbol;Acc:23526]                     |
| 1080 | ENSG00000100342 | 931.6942569 | 1.484814531  | 0.123238171 | 3.43E-32 | APOL1      | apolipoprotein L, 1 [Source:HGNC Symbol;Acc:618]                                   |
| 1081 | ENSG00000120738 | 2644.166759 | -0.930239206 | 0.077228967 | 3.56E-32 | EGR1       | early growth response 1 [Source:HGNC Symbol;Acc:3238]                              |
| 1082 | ENSG00000171914 | 262.4523868 | -2.646116057 | 0.219766377 | 3.76E-32 | TLN2       | talin 2 [Source:HGNC Symbol;Acc:15447]                                             |
| 1083 | ENSG00000111666 | 1594.626891 | -1.291039806 | 0.107254226 | 3.91E-32 | CHPT1      | choline phosphotransferase 1 [Source:HGNC Symbol;Acc:17852]                        |
| 1084 | ENSG00000101152 | 4053.752558 | -0.896884233 | 0.074544107 | 4.19E-32 | DNAJC5     | DnaJ (Hsp40) homolog, subfamily C, member 5 [Source:HGNC Symbol;Acc:16235]         |
| 1085 | ENSG00000197635 | 267.8445193 | 2.698402382  | 0.224335803 | 4.35E-32 | DPP4       | dipeptidyl-peptidase 4 [Source:HGNC Symbol;Acc:3009]                               |
| 1086 | ENSG00000177469 | 218.6341554 | -2.792144881 | 0.232365167 | 5.03E-32 | PTRF       | polymerase I and transcript release factor [Source:HGNC Symbol;Acc:9688]           |

|      |                 |             |              |             |          |          |                                                                                                              |
|------|-----------------|-------------|--------------|-------------|----------|----------|--------------------------------------------------------------------------------------------------------------|
| 1087 | ENSG00000058063 | 3806.169945 | -0.857470213 | 0.071386126 | 5.31E-32 | ATP11B   | ATPase, class VI, type 11B [Source:HGNC Symbol;Acc:13553]                                                    |
| 1088 | ENSG00000168497 | 340.1328732 | 2.28501942   | 0.190850874 | 8.49E-32 | SDPR     | serum deprivation response [Source:HGNC Symbol;Acc:10690]                                                    |
| 1089 | ENSG00000100226 | 2941.244623 | -1.298331382 | 0.108554507 | 9.87E-32 | GTPBP1   | GTP binding protein 1 [Source:HGNC Symbol;Acc:4669]                                                          |
| 1090 | ENSG00000153666 | 1927.780364 | -1.007454018 | 0.084293895 | 1.09E-31 | GOLGA8I  | golgin A8 family, member I [Source:HGNC Symbol;Acc:26660]                                                    |
| 1091 | ENSG00000070404 | 587.9175329 | -1.740033004 | 0.145594556 | 1.10E-31 | FSTL3    | folliculin-like 3 (secreted glycoprotein) [Source:HGNC Symbol;Acc:3973]                                      |
| 1092 | ENSG00000147689 | 169.9893951 | -3.338740578 | 0.279389125 | 1.11E-31 | FAM83A   | family with sequence similarity 83, member A [Source:HGNC Symbol;Acc:28210]                                  |
| 1093 | ENSG00000044574 | 5539.390354 | -0.707296094 | 0.059196739 | 1.14E-31 | HSPA5    | heat shock 70kDa protein 5 (glucose-regulated protein, 78kDa) [Source:HGNC Symbol;Acc:5238]                  |
| 1094 | ENSG00000035862 | 4454.792866 | -0.727045725 | 0.060850683 | 1.14E-31 | TIMP2    | TIMP metalloproteinase inhibitor 2 [Source:HGNC Symbol;Acc:11821]                                            |
| 1095 | ENSG00000211899 | 1015.453837 | 1.892562352  | 0.15847437  | 1.22E-31 | IGHM     | immunoglobulin heavy constant mu [Source:HGNC Symbol;Acc:5541]                                               |
| 1096 | ENSG00000115525 | 382.418529  | 2.112523882  | 0.17700888  | 1.33E-31 | ST3GALS5 | ST3 beta-galactoside alpha-2,3-sialyltransferase 5 [Source:HGNC Symbol;Acc:10872]                            |
| 1097 | ENSG00000136999 | 716.3618161 | 1.687323498  | 0.14143854  | 1.41E-31 | NOV      | nephroblastoma overexpressed [Source:HGNC Symbol;Acc:7885]                                                   |
| 1098 | ENSG00000206190 | 276.0938247 | 2.603155468  | 0.218211946 | 1.42E-31 | ATP10A   | ATPase, class V, type 10A [Source:HGNC Symbol;Acc:13542]                                                     |
| 1099 | ENSG00000114423 | 907.6742373 | 1.359628872  | 0.114213772 | 1.92E-31 | CBLB     | Cbl proto-oncogene B, E3 ubiquitin protein ligase [Source:HGNC Symbol;Acc:1542]                              |
| 1100 | ENSG00000101916 | 2893.92181  | 0.88723513   | 0.074543818 | 1.96E-31 | TLR8     | toll-like receptor 8 [Source:HGNC Symbol;Acc:15632]                                                          |
| 1101 | ENSG00000150593 | 3184.722219 | 0.86804727   | 0.072990597 | 2.20E-31 | PDCD4    | programmed cell death 4 (neoplastic transformation inhibitor) [Source:HGNC Symbol;Acc:8763]                  |
| 1102 | ENSG00000109805 | 360.2096695 | -2.110496208 | 0.177657144 | 2.57E-31 | NCAPG    | non-SMC condensin I complex, subunit G [Source:HGNC Symbol;Acc:24304]                                        |
| 1103 | ENSG00000120910 | 577.0575981 | 1.787929908  | 0.150551707 | 2.68E-31 | PPP3CC   | protein phosphatase 3, catalytic subunit, gamma isozyme [Source:HGNC Symbol;Acc:9316]                        |
| 1104 | ENSG00000139436 | 6565.086605 | -0.686632248 | 0.057841683 | 2.84E-31 | GIT2     | G protein-coupled receptor kinase interacting ArfGAP 2 [Source:HGNC Symbol;Acc:4273]                         |
| 1105 | ENSG00000163739 | 1023.772337 | -1.252339227 | 0.105513978 | 2.91E-31 | CXCL1    | chemokine (C-X-C motif) ligand 1 (melanoma growth stimulating activity, alpha) [Source:HGNC Symbol;Acc:4602] |
| 1106 | ENSG00000166888 | 18967.27421 | 0.519738441  | 0.043816538 | 3.17E-31 | STAT6    | signal transducer and activator of transcription 6, interleukin-4 induced [Source:HGNC Symbol;Acc:11368]     |
| 1107 | ENSG00000143167 | 144.4267323 | 3.815642425  | 0.321687728 | 3.18E-31 | GPA33    | glycoprotein A33 (transmembrane) [Source:HGNC Symbol;Acc:4445]                                               |
| 1108 | ENSG00000002834 | 13336.81699 | -0.532992978 | 0.044945993 | 3.28E-31 | LASP1    | LIM and SH3 protein 1 [Source:HGNC Symbol;Acc:6513]                                                          |
| 1109 | ENSG00000148200 | 621.6764885 | -1.564019862 | 0.131900593 | 3.32E-31 | NR6A1    | nuclear receptor subfamily 6, group A, member 1 [Source:HGNC Symbol;Acc:7985]                                |
| 1110 | ENSG00000156265 | 361.5906834 | 2.118079527  | 0.178646257 | 3.37E-31 | MAP3K7CL | MAP3K7 C-terminal like [Source:HGNC Symbol;Acc:16457]                                                        |
| 1111 | ENSG00000167642 | 1806.63186  | -1.021038556 | 0.086126751 | 3.41E-31 | SPINT2   | serine peptidase inhibitor, Kunitz type, 2 [Source:HGNC Symbol;Acc:11247]                                    |
| 1112 | ENSG00000140403 | 679.921513  | -1.553228302 | 0.131082876 | 3.66E-31 | DNAJA4   | DnaJ (Hsp40) homolog, subfamily A, member 4 [Source:HGNC Symbol;Acc:14885]                                   |
| 1113 | ENSG00000135476 | 382.9909536 | -2.015168034 | 0.17022023  | 4.15E-31 | ESPL1    | extra spindle pole bodies homolog 1 (S. cerevisiae) [Source:HGNC Symbol;Acc:16856]                           |
| 1114 | ENSG00000070961 | 1549.273866 | 1.410919035  | 0.119231975 | 4.41E-31 | ATP2B1   | ATPase, Ca <sup>++</sup> transporting, plasma membrane 1 [Source:HGNC Symbol;Acc:814]                        |

|      |                 |             |              |             |          |           |                                                                                                                                     |
|------|-----------------|-------------|--------------|-------------|----------|-----------|-------------------------------------------------------------------------------------------------------------------------------------|
| 1115 | ENSG00000183049 | 2453.482106 | 0.892152325  | 0.075410414 | 4.55E-31 | CAMK1D    | calcium/calmodulin-dependent protein kinase ID [Source:HGNC Symbol;Acc:19341]                                                       |
| 1116 | ENSG00000206561 | 292.4345525 | 2.36157393   | 0.199890588 | 5.52E-31 | COLQ      | collagen-like tail subunit (single strand of homotrimer) of asymmetric acetylcholinesterase [Source:HGNC Symbol;Acc:2226]           |
| 1117 | ENSG00000177685 | 630.5205107 | -1.839051965 | 0.1558827   | 6.72E-31 | EFCAB4A   | EF-hand calcium binding domain 4A [Source:HGNC Symbol;Acc:28703]                                                                    |
| 1118 | ENSG00000172466 | 2415.553882 | 1.025757591  | 0.086955443 | 6.82E-31 | ZNF24     | zinc finger protein 24 [Source:HGNC Symbol;Acc:13032]                                                                               |
| 1119 | ENSG00000105374 | 5874.924296 | 0.749528017  | 0.063574896 | 7.38E-31 | NKG7      | natural killer cell group 7 sequence [Source:HGNC Symbol;Acc:7830]                                                                  |
| 1120 | ENSG00000079739 | 1263.619844 | -1.170849957 | 0.099350422 | 7.79E-31 | PGM1      | phosphoglucomutase 1 [Source:HGNC Symbol;Acc:8905]                                                                                  |
| 1121 | ENSG00000091972 | 226.4705405 | 3.056843735  | 0.259577127 | 8.64E-31 | CD200     | CD200 molecule [Source:HGNC Symbol;Acc:7203]                                                                                        |
| 1122 | ENSG00000185187 | 835.3044613 | 1.569163939  | 0.133383947 | 9.95E-31 | SIGIRR    | single immunoglobulin and toll-interleukin 1 receptor (TIR) domain [Source:HGNC Symbol;Acc:30575]                                   |
| 1123 | ENSG00000196371 | 2152.342689 | -0.941755478 | 0.080059839 | 1.01E-30 | FUT4      | fucosyltransferase 4 (alpha (1,3) fucosyltransferase, myeloid-specific) [Source:HGNC Symbol;Acc:4015]                               |
| 1124 | ENSG00000005844 | 11562.98765 | 0.578253864  | 0.049176145 | 1.06E-30 | ITGAL     | integrin, alpha L (antigen CD11A (p180), lymphocyte function-associated antigen 1; alpha polypeptide) [Source:HGNC Symbol;Acc:6148] |
| 1125 | ENSG00000130222 | 226.0562598 | -2.741902705 | 0.233200202 | 1.07E-30 | GADD45G   | growth arrest and DNA-damage-inducible, gamma [Source:HGNC Symbol;Acc:4097]                                                         |
| 1126 | ENSG00000012124 | 858.2585122 | 1.590688314  | 0.135381972 | 1.18E-30 | CD22      | CD22 molecule [Source:HGNC Symbol;Acc:1643]                                                                                         |
| 1127 | ENSG00000150637 | 262.9717228 | 2.911869909  | 0.24804399  | 1.33E-30 | CD226     | CD226 molecule [Source:HGNC Symbol;Acc:16961]                                                                                       |
| 1128 | ENSG00000120889 | 3463.708693 | 1.033683172  | 0.088167894 | 1.59E-30 | TNFRSF10B | tumor necrosis factor receptor superfamily, member 10b [Source:HGNC Symbol;Acc:11905]                                               |
| 1129 | ENSG00000135776 | 774.7934865 | -1.42828334  | 0.121902699 | 1.74E-30 | ABCB10    | ATP-binding cassette, sub-family B (MDR/TAP), member 10 [Source:HGNC Symbol;Acc:41]                                                 |
| 1130 | ENSG00000177189 | 3079.974463 | 0.820329525  | 0.070230851 | 2.66E-30 | RPS6KA3   | ribosomal protein S6 kinase, 90kDa, polypeptide 3 [Source:HGNC Symbol;Acc:10432]                                                    |
| 1131 | ENSG00000141232 | 1524.828556 | -1.059604834 | 0.090866179 | 3.33E-30 | TOB1      | transducer of ERBB2, 1 [Source:HGNC Symbol;Acc:11979]                                                                               |
| 1132 | ENSG00000235162 | 261.423355  | 2.63270547   | 0.22584479  | 3.49E-30 | C12orf75  | chromosome 12 open reading frame 75 [Source:HGNC Symbol;Acc:35164]                                                                  |
| 1133 | ENSG00000104964 | 3865.34663  | 2.049078871  | 0.176010359 | 4.17E-30 | AES       | amino-terminal enhancer of split [Source:HGNC Symbol;Acc:307]                                                                       |
| 1134 | ENSG00000140030 | 739.6545586 | 1.483300387  | 0.127436382 | 4.28E-30 | GPR65     | G protein-coupled receptor 65 [Source:HGNC Symbol;Acc:4517]                                                                         |
| 1135 | ENSG00000024526 | 174.978159  | -3.049701619 | 0.262170717 | 4.64E-30 | DEPDC1    | DEP domain containing 1 [Source:HGNC Symbol;Acc:22949]                                                                              |
| 1136 | ENSG00000119121 | 1050.400309 | -1.298396003 | 0.111726541 | 5.30E-30 | TRPM6     | transient receptor potential cation channel, subfamily M, member 6 [Source:HGNC Symbol;Acc:17995]                                   |
| 1137 | ENSG00000273173 | 572.2661133 | 1.83245384   | 0.157797113 | 5.85E-30 | SNURF     | SNRPN upstream reading frame protein [Source:UniProtKB/Swiss-Prot;Acc:Q9Y675]                                                       |
| 1138 | ENSG00000163541 | 1705.648753 | -1.029447203 | 0.088705581 | 6.38E-30 | SUCLG1    | succinate-CoA ligase, alpha subunit [Source:HGNC Symbol;Acc:11449]                                                                  |
| 1139 | ENSG00000064115 | 1312.695716 | -1.1098272   | 0.095640677 | 6.45E-30 | TM7SF3    | transmembrane 7 superfamily member 3 [Source:HGNC Symbol;Acc:23049]                                                                 |
| 1140 | ENSG00000135451 | 505.053601  | -2.232250377 | 0.192866034 | 9.15E-30 | TROAP     | trophinin associated protein [Source:HGNC Symbol;Acc:12327]                                                                         |
| 1141 | ENSG00000161800 | 597.3731174 | -1.639685881 | 0.141782152 | 1.02E-29 | RACGAP1   | Rac GTPase activating protein 1 [Source:HGNC Symbol;Acc:9804]                                                                       |
| 1142 | ENSG00000178999 | 391.4625784 | -1.915806492 | 0.165671657 | 1.03E-29 | AURKB     | aurora kinase B [Source:HGNC Symbol;Acc:11390]                                                                                      |

|      |                 |             |              |             |          |         |                                                                                                |
|------|-----------------|-------------|--------------|-------------|----------|---------|------------------------------------------------------------------------------------------------|
| 1143 | ENSG00000102349 | 275.5718988 | 2.334455649  | 0.202098392 | 1.19E-29 | KLF8    | Kruppel-like factor 8 [Source:HGNC Symbol;Acc:6351]                                            |
| 1144 | ENSG00000119335 | 4626.770376 | 0.745088582  | 0.064529164 | 1.26E-29 | SET     | SET nuclear oncogene [Source:HGNC Symbol;Acc:10760]                                            |
| 1145 | ENSG00000135407 | 702.3320904 | 1.51552981   | 0.131256824 | 1.26E-29 | AVIL    | advillin [Source:HGNC Symbol;Acc:14188]                                                        |
| 1146 | ENSG00000163737 | 160.6980136 | 3.322035164  | 0.287735301 | 1.27E-29 | PF4     | platelet factor 4 [Source:HGNC Symbol;Acc:8861]                                                |
| 1147 | ENSG00000161011 | 4067.500691 | 0.875828815  | 0.07587367  | 1.30E-29 | SQSTM1  | sequestosome 1 [Source:HGNC Symbol;Acc:11280]                                                  |
| 1148 | ENSG00000125538 | 661.0872396 | 1.592774546  | 0.138075868 | 1.42E-29 | IL1B    | interleukin 1, beta [Source:HGNC Symbol;Acc:5992]                                              |
| 1149 | ENSG00000086288 | 1015.444746 | -1.205857811 | 0.104552269 | 1.46E-29 | NME8    | NME/NM23 family member 8 [Source:HGNC Symbol;Acc:16473]                                        |
| 1150 | ENSG00000005020 | 3347.124851 | -0.785280844 | 0.068105    | 1.51E-29 | SKAP2   | src kinase associated phosphoprotein 2 [Source:HGNC Symbol;Acc:15687]                          |
| 1151 | ENSG00000011422 | 2372.624016 | -0.884833784 | 0.076806433 | 1.69E-29 | PLAUR   | plasminogen activator, urokinase receptor [Source:HGNC Symbol;Acc:9053]                        |
| 1152 | ENSG00000154767 | 1398.392674 | 1.148971272  | 0.099863049 | 2.01E-29 | XPC     | xeroderma pigmentosum, complementation group C [Source:HGNC Symbol;Acc:12816]                  |
| 1153 | ENSG00000162892 | 363.1886252 | 2.49498984   | 0.216982371 | 2.18E-29 | IL24    | interleukin 24 [Source:HGNC Symbol;Acc:11346]                                                  |
| 1154 | ENSG00000122188 | 357.8144016 | 2.210750469  | 0.192276834 | 2.20E-29 | LAX1    | lymphocyte transmembrane adaptor 1 [Source:HGNC Symbol;Acc:26005]                              |
| 1155 | ENSG00000259207 | 233.4548106 | 2.783168848  | 0.242069601 | 2.20E-29 | ITGB3   | integrin, beta 3 (platelet glycoprotein IIIa, antigen CD61) [Source:HGNC Symbol;Acc:6156]      |
| 1156 | ENSG00000143771 | 1229.65879  | -1.182419056 | 0.102843926 | 2.21E-29 | CNIH4   | cornichon family AMPA receptor auxiliary protein 4 [Source:HGNC Symbol;Acc:25013]              |
| 1157 | ENSG00000080573 | 205.2478591 | 3.163591261  | 0.275269218 | 2.32E-29 | COL5A3  | collagen, type V, alpha 3 [Source:HGNC Symbol;Acc:14864]                                       |
| 1158 | ENSG00000153317 | 3850.899509 | -0.743579498 | 0.064711059 | 2.37E-29 | ASAP1   | ArfGAP with SH3 domain, ankyrin repeat and PH domain 1 [Source:HGNC Symbol;Acc:2720]           |
| 1159 | ENSG00000091490 | 768.7791669 | 1.504034951  | 0.13091167  | 2.42E-29 | SEL1L3  | sel-1 suppressor of lin-12-like 3 (C. elegans) [Source:HGNC Symbol;Acc:29108]                  |
| 1160 | ENSG00000156587 | 1551.781256 | 1.041795141  | 0.090687997 | 2.45E-29 | UBE2L6  | ubiquitin-conjugating enzyme E2L 6 [Source:HGNC Symbol;Acc:12490]                              |
| 1161 | ENSG00000127920 | 133.5880822 | 3.707881563  | 0.322820786 | 2.50E-29 | GNG11   | guanine nucleotide binding protein (G protein), gamma 11 [Source:HGNC Symbol;Acc:4403]         |
| 1162 | ENSG00000143643 | 1702.852634 | -1.033319551 | 0.089964529 | 2.50E-29 | TTC13   | tetratricopeptide repeat domain 13 [Source:HGNC Symbol;Acc:26204]                              |
| 1163 | ENSG00000197629 | 7366.444909 | 0.625137976  | 0.054493503 | 2.94E-29 | MPEG1   | macrophage expressed 1 [Source:HGNC Symbol;Acc:29619]                                          |
| 1164 | ENSG00000117602 | 1237.104224 | 1.237975126  | 0.107916952 | 2.95E-29 | RCAN3   | RCAN family member 3 [Source:HGNC Symbol;Acc:3042]                                             |
| 1165 | ENSG00000160932 | 714.1644169 | 1.622383227  | 0.141536878 | 3.27E-29 | LY6E    | lymphocyte antigen 6 complex, locus E [Source:HGNC Symbol;Acc:6727]                            |
| 1166 | ENSG00000167553 | 954.0070911 | -1.274122354 | 0.111199687 | 3.44E-29 | TUBA1C  | tubulin, alpha 1c [Source:HGNC Symbol;Acc:20768]                                               |
| 1167 | ENSG00000144893 | 688.7919227 | -1.644918685 | 0.143664818 | 3.78E-29 | MED12L  | mediator complex subunit 12-like [Source:HGNC Symbol;Acc:16050]                                |
| 1168 | ENSG00000118276 | 277.2031216 | 2.367799096  | 0.207001159 | 4.30E-29 | B4GALT6 | UDP-Gal:betaGlcNAc beta 1,4- galactosyltransferase, polypeptide 6 [Source:HGNC Symbol;Acc:929] |
| 1169 | ENSG00000116667 | 361.2803306 | 2.265108106  | 0.198133153 | 4.62E-29 | C1orf21 | chromosome 1 open reading frame 21 [Source:HGNC Symbol;Acc:15494]                              |
| 1170 | ENSG00000168961 | 2797.3639   | 0.891360151  | 0.077986691 | 4.76E-29 | LGALS9  | lectin, galactoside-binding, soluble, 9 [Source:HGNC Symbol;Acc:6570]                          |



|      |                 |             |              |             |          |           |                                                                                                                        |
|------|-----------------|-------------|--------------|-------------|----------|-----------|------------------------------------------------------------------------------------------------------------------------|
| 1171 | ENSG00000157551 | 4983.556969 | 0.704343545  | 0.06168726  | 5.43E-29 | KCNJ15    | potassium inwardly-rectifying channel, subfamily J, member 15 [Source:HGNC Symbol;Acc:6261]                            |
| 1172 | ENSG00000067836 | 1468.713583 | -1.219772477 | 0.106892853 | 5.87E-29 | ROGDI     | rogdi homolog (Drosophila) [Source:HGNC Symbol;Acc:29478]                                                              |
| 1173 | ENSG00000118707 | 511.2513215 | 1.726240556  | 0.1513316   | 6.15E-29 | TGIF2     | TGFB-induced factor homeobox 2 [Source:HGNC Symbol;Acc:15764]                                                          |
| 1174 | ENSG00000105835 | 17876.7273  | 0.509217235  | 0.044662868 | 6.56E-29 | NAMPT     | nicotinamide phosphoribosyltransferase [Source:HGNC Symbol;Acc:30092]                                                  |
| 1175 | ENSG00000198826 | 443.5439692 | -1.993174874 | 0.175082329 | 7.98E-29 | ARHGAP11A | Rho GTPase activating protein 11A [Source:HGNC Symbol;Acc:15783]                                                       |
| 1176 | ENSG00000125633 | 2010.655966 | -0.944841534 | 0.083013866 | 8.21E-29 | CCDC93    | coiled-coil domain containing 93 [Source:HGNC Symbol;Acc:25611]                                                        |
| 1177 | ENSG00000138744 | 787.0504498 | 1.468664152  | 0.129070203 | 8.48E-29 | NAAA      | N-acylethanolamine acid amidase [Source:HGNC Symbol;Acc:736]                                                           |
| 1178 | ENSG00000229644 | 724.8793252 | 1.50366495   | 0.132198933 | 8.92E-29 | NAMPTL    | nicotinamide phosphoribosyltransferase-like [Source:HGNC Symbol;Acc:17633]                                             |
| 1179 | ENSG00000090776 | 160.4384196 | 3.168525423  | 0.278588021 | 8.99E-29 | EFNB1     | ephrin-B1 [Source:HGNC Symbol;Acc:3226]                                                                                |
| 1180 | ENSG00000108828 | 2024.331201 | -1.238910377 | 0.108955072 | 9.27E-29 | VAT1      | vesicle amine transport 1 [Source:HGNC Symbol;Acc:16919]                                                               |
| 1181 | ENSG00000262655 | 127.4581237 | 4.128725279  | 0.363130901 | 9.37E-29 | SPON1     | spondin 1, extracellular matrix protein [Source:HGNC Symbol;Acc:11252]                                                 |
| 1182 | ENSG00000115268 | 3360.154339 | 0.865535205  | 0.076190399 | 1.05E-28 | RPS15     | ribosomal protein S15 [Source:HGNC Symbol;Acc:10388]                                                                   |
| 1183 | ENSG00000111186 | 342.6405064 | -2.126084145 | 0.187208496 | 1.09E-28 | WNT5B     | wingless-type MMTV integration site family, member 5B [Source:HGNC Symbol;Acc:16265]                                   |
| 1184 | ENSG00000256660 | 1187.135254 | -1.162198839 | 0.102343935 | 1.10E-28 | CLEC12B   | C-type lectin domain family 12, member B [Source:HGNC Symbol;Acc:31966]                                                |
| 1185 | ENSG00000070444 | 1488.167021 | -1.080296319 | 0.095184211 | 1.18E-28 | MNT       | MAX network transcriptional repressor [Source:HGNC Symbol;Acc:7188]                                                    |
| 1186 | ENSG00000135631 | 165.3449426 | 3.462740334  | 0.305396864 | 1.33E-28 | RAB11FIP5 | RAB11 family interacting protein 5 (class I) [Source:HGNC Symbol;Acc:24845]                                            |
| 1187 | ENSG00000101057 | 453.5631957 | -1.895116432 | 0.16715274  | 1.35E-28 | MYBL2     | v-myb avian myeloblastosis viral oncogene homolog-like 2 [Source:HGNC Symbol;Acc:7548]                                 |
| 1188 | ENSG00000122952 | 495.8656779 | -1.740913909 | 0.153576401 | 1.37E-28 | ZWINT     | ZW10 interacting kinetochore protein [Source:HGNC Symbol;Acc:13195]                                                    |
| 1189 | ENSG00000182263 | 655.3415971 | -1.666345193 | 0.14703808  | 1.42E-28 | FIGN      | figetin [Source:HGNC Symbol;Acc:13285]                                                                                 |
| 1190 | ENSG00000172575 | 1187.490456 | 1.143820839  | 0.100978792 | 1.51E-28 | RASGRP1   | RAS guanyl releasing protein 1 (calcium and DAG-regulated) [Source:HGNC Symbol;Acc:9878]                               |
| 1191 | ENSG00000112294 | 345.1192673 | 2.161322378  | 0.190955872 | 1.67E-28 | ALDH5A1   | aldehyde dehydrogenase 5 family, member A1 [Source:HGNC Symbol;Acc:408]                                                |
| 1192 | ENSG00000169418 | 97.45013084 | 4.676919016  | 0.413565286 | 1.86E-28 | NPR1      | natriuretic peptide receptor A/guanylate cyclase A (atrionatriuretic peptide receptor A) [Source:HGNC Symbol;Acc:7943] |
| 1193 | ENSG00000163399 | 3225.018058 | 0.813179004  | 0.071920424 | 1.91E-28 | ATP1A1    | ATPase, Na <sup>+</sup> /K <sup>+</sup> transporting, alpha 1 polypeptide [Source:HGNC Symbol;Acc:799]                 |
| 1194 | ENSG00000198604 | 4833.761196 | -1.055212045 | 0.093337856 | 1.94E-28 | BAZ1A     | bromodomain adjacent to zinc finger domain, 1A [Source:HGNC Symbol;Acc:960]                                            |
| 1195 | ENSG00000261919 | 5966.556771 | -0.722443029 | 0.063917844 | 1.99E-28 | NCF1      | neutrophil cytosolic factor 1 [Source:HGNC Symbol;Acc:7660]                                                            |
| 1196 | ENSG00000240303 | 1247.139033 | -1.114141863 | 0.098641591 | 2.18E-28 | ACAD11    | acyl-CoA dehydrogenase family, member 11 [Source:HGNC Symbol;Acc:30211]                                                |
| 1197 | ENSG00000058866 | 606.8767986 | -1.844988622 | 0.163418416 | 2.30E-28 | DGKG      | diacylglycerol kinase, gamma 90kDa [Source:HGNC Symbol;Acc:2853]                                                       |
| 1198 | ENSG00000119402 | 3424.140627 | -0.767467917 | 0.068000725 | 2.40E-28 | FBXW2     | F-box and WD repeat domain containing 2 [Source:HGNC Symbol;Acc:13608]                                                 |

|      |                 |             |              |             |          |               |                                                                                           |
|------|-----------------|-------------|--------------|-------------|----------|---------------|-------------------------------------------------------------------------------------------|
| 1199 | ENSG00000058272 | 4922.5965   | -0.736925959 | 0.065316438 | 2.50E-28 | PPP1R12A      | protein phosphatase 1, regulatory subunit 12A [Source:HGNC Symbol;Acc:7618]               |
| 1200 | ENSG00000176788 | 6462.535066 | -0.679491665 | 0.060248983 | 2.63E-28 | BASP1         | brain abundant, membrane attached signal protein 1 [Source:HGNC Symbol;Acc:957]           |
| 1201 | ENSG00000104738 | 991.6962208 | -1.293368824 | 0.114712496 | 2.72E-28 | MCM4          | minichromosome maintenance complex component 4 [Source:HGNC Symbol;Acc:6947]              |
| 1202 | ENSG00000153250 | 4681.865915 | -0.75728344  | 0.06717366  | 2.76E-28 | RBMS1         | RNA binding motif, single stranded interacting protein 1 [Source:HGNC Symbol;Acc:9907]    |
| 1203 | ENSG00000134057 | 277.0866907 | -2.300393761 | 0.204174268 | 2.98E-28 | CCNB1         | cyclin B1 [Source:HGNC Symbol;Acc:1579]                                                   |
| 1204 | ENSG00000267816 | 2845.859348 | 0.926946174  | 0.082331615 | 3.26E-28 | IDS           | iduronate 2-sulfatase [Source:HGNC Symbol;Acc:5389]                                       |
| 1205 | ENSG00000143851 | 2204.492143 | -0.909011197 | 0.080755559 | 3.35E-28 | PTPN7         | protein tyrosine phosphatase, non-receptor type 7 [Source:HGNC Symbol;Acc:9659]           |
| 1206 | ENSG00000101082 | 470.4608039 | 1.811505985  | 0.161205955 | 4.15E-28 | SLA2          | Src-like-adaptor 2 [Source:HGNC Symbol;Acc:17329]                                         |
| 1207 | ENSG00000113088 | 494.4971423 | 1.79764061   | 0.160008409 | 4.27E-28 | GZMK          | granzyme K (granzyme 3; tryptase II) [Source:HGNC Symbol;Acc:4711]                        |
| 1208 | ENSG00000007516 | 473.3120358 | 2.610717996  | 0.232404472 | 4.32E-28 | BAIAP3        | BAI1-associated protein 3 [Source:HGNC Symbol;Acc:948]                                    |
| 1209 | ENSG00000174946 | 222.2137803 | 2.988642778  | 0.266078072 | 4.38E-28 | GPR171        | G protein-coupled receptor 171 [Source:HGNC Symbol;Acc:30057]                             |
| 1210 | ENSG00000120868 | 5619.092372 | -0.675897618 | 0.060175138 | 4.38E-28 | APAF1         | apoptotic peptidase activating factor 1 [Source:HGNC Symbol;Acc:576]                      |
| 1211 | ENSG00000131981 | 1439.124262 | -1.054404428 | 0.093886191 | 4.46E-28 | LGALS3        | lectin, galactoside-binding, soluble, 3 [Source:HGNC Symbol;Acc:6563]                     |
| 1212 | ENSG00000088387 | 521.5555216 | 2.004807904  | 0.178519607 | 4.48E-28 | DOCK9         | dedicator of cytokinesis 9 [Source:HGNC Symbol;Acc:14132]                                 |
| 1213 | ENSG00000117616 | 10327.46561 | -0.692145041 | 0.061684043 | 4.97E-28 | C1orf63       | chromosome 1 open reading frame 63 [Source:HGNC Symbol;Acc:25234]                         |
| 1214 | ENSG00000181631 | 7504.493865 | 0.688825401  | 0.061389778 | 4.98E-28 | P2RY13        | purinergic receptor P2Y, G-protein coupled, 13 [Source:HGNC Symbol;Acc:4537]              |
| 1215 | ENSG00000140525 | 905.1451586 | -1.40682879  | 0.125410572 | 5.14E-28 | FANCI         | Fanconi anemia, complementation group I [Source:HGNC Symbol;Acc:25568]                    |
| 1216 | ENSG00000119669 | 429.3842056 | 1.962371896  | 0.174967419 | 5.26E-28 | IRF2BP1       | interferon regulatory factor 2 binding protein-like [Source:HGNC Symbol;Acc:14282]        |
| 1217 | ENSG00000175489 | 3245.198533 | 0.839546665  | 0.074857736 | 5.28E-28 | LRRC25        | leucine rich repeat containing 25 [Source:HGNC Symbol;Acc:29806]                          |
| 1218 | ENSG00000134516 | 7514.271965 | -0.591829974 | 0.05282166  | 5.97E-28 | DOCK2         | dedicator of cytokinesis 2 [Source:HGNC Symbol;Acc:2988]                                  |
| 1219 | ENSG00000033627 | 2754.987806 | -0.917782168 | 0.081936746 | 6.18E-28 | ATP6V0A1      | ATPase, H <sup>+</sup> transporting, lysosomal V0 subunit a1 [Source:HGNC Symbol;Acc:865] |
| 1220 | ENSG00000184368 | 250.1064705 | -2.604262611 | 0.232518343 | 6.24E-28 | MAP7D2        | MAP7 domain containing 2 [Source:HGNC Symbol;Acc:25899]                                   |
| 1221 | ENSG00000122126 | 631.143068  | -1.469022415 | 0.131279569 | 6.99E-28 | OCRL          | oculocerebrorenal syndrome of Lowe [Source:HGNC Symbol;Acc:8108]                          |
| 1222 | ENSG00000266820 | 1219.508999 | -1.095679741 | 0.097941775 | 7.23E-28 | RP13-104F24.1 |                                                                                           |
| 1223 | ENSG00000242361 | 440.7726439 | 1.879089631  | 0.167986935 | 7.31E-28 | HLA-DMA       | major histocompatibility complex, class II, DM alpha [Source:HGNC Symbol;Acc:4934]        |
| 1224 | ENSG00000143549 | 15423.6284  | -0.504028859 | 0.04506037  | 7.33E-28 | TPM3          | tropomyosin 3 [Source:HGNC Symbol;Acc:12012]                                              |
| 1225 | ENSG00000131669 | 3508.458169 | 1.09390429   | 0.097940403 | 8.83E-28 | NINJ1         | ninjurin 1 [Source:HGNC Symbol;Acc:7824]                                                  |
| 1226 | ENSG00000136942 | 4295.999456 | 0.842274169  | 0.075464687 | 9.64E-28 | RPL35         | ribosomal protein L35 [Source:HGNC Symbol;Acc:10344]                                      |

|      |                 |             |              |             |          |               |                                                                                                                  |
|------|-----------------|-------------|--------------|-------------|----------|---------------|------------------------------------------------------------------------------------------------------------------|
| 1227 | ENSG00000110777 | 721.9587431 | 1.447456689  | 0.129815632 | 1.09E-27 | POU2AF1       | POU class 2 associating factor 1 [Source:HGNC Symbol;Acc:9211]                                                   |
| 1228 | ENSG00000135218 | 1520.573548 | -1.082356806 | 0.097073336 | 1.09E-27 | CD36          | CD36 molecule (thrombospondin receptor) [Source:HGNC Symbol;Acc:1663]                                            |
| 1229 | ENSG00000114573 | 3035.184611 | 0.835426578  | 0.074965309 | 1.16E-27 | ATP6V1A       | ATPase, H <sup>+</sup> transporting, lysosomal 70kDa, V1 subunit A [Source:HGNC Symbol;Acc:851]                  |
| 1230 | ENSG00000173193 | 2163.420171 | 0.911905857  | 0.081861211 | 1.22E-27 | PARP14        | poly (ADP-ribose) polymerase family, member 14 [Source:HGNC Symbol;Acc:29232]                                    |
| 1231 | ENSG00000142173 | 318.3734603 | 2.757986529  | 0.247599021 | 1.23E-27 | COL6A2        | collagen, type VI, alpha 2 [Source:HGNC Symbol;Acc:2212]                                                         |
| 1232 | ENSG00000107566 | 1455.805276 | -1.069351308 | 0.096043528 | 1.30E-27 | ERLIN1        | ER lipid raft associated 1 [Source:HGNC Symbol;Acc:16947]                                                        |
| 1233 | ENSG00000196531 | 8154.742721 | 0.620683149  | 0.05577236  | 1.38E-27 | NACA          | nascent polypeptide-associated complex alpha subunit [Source:HGNC Symbol;Acc:7629]                               |
| 1234 | ENSG00000110721 | 1651.461612 | -1.075839326 | 0.096673185 | 1.38E-27 | CHKA          | choline kinase alpha [Source:HGNC Symbol;Acc:1937]                                                               |
| 1235 | ENSG00000072571 | 192.2151774 | -2.670826739 | 0.240060709 | 1.43E-27 | HMMR          | hyaluronan-mediated motility receptor (RHAMM) [Source:HGNC Symbol;Acc:5012]                                      |
| 1236 | ENSG00000134686 | 4916.646564 | 0.71560636   | 0.064334969 | 1.47E-27 | PHC2          | polyhomeotic homolog 2 (Drosophila) [Source:HGNC Symbol;Acc:3183]                                                |
| 1237 | ENSG00000196502 | 1924.00363  | -1.007974413 | 0.090669563 | 1.57E-27 | SULT1A1       | sulfotransferase family, cytosolic, 1A, phenol-preferring, member 1 [Source:HGNC Symbol;Acc:11453]               |
| 1238 | ENSG00000146859 | 1112.168966 | 1.286430503  | 0.115724718 | 1.58E-27 | TMEM140       | transmembrane protein 140 [Source:HGNC Symbol;Acc:21870]                                                         |
| 1239 | ENSG00000164713 | 4220.346771 | -0.703882376 | 0.063410156 | 1.88E-27 | BRI3          | brain protein I3 [Source:HGNC Symbol;Acc:1109]                                                                   |
| 1240 | ENSG00000255594 | 6096.5371   | -0.864781945 | 0.077913179 | 1.91E-27 | Z82188.1      |                                                                                                                  |
| 1241 | ENSG00000120896 | 230.1167296 | 2.745018294  | 0.24733432  | 1.93E-27 | SORBS3        | sorbin and SH3 domain containing 3 [Source:HGNC Symbol;Acc:30907]                                                |
| 1242 | ENSG00000185829 | 1163.200733 | -1.083912319 | 0.097706426 | 2.03E-27 | ARL17A        | ADP-ribosylation factor-like 17A [Source:HGNC Symbol;Acc:24096]                                                  |
| 1243 | ENSG00000147416 | 11533.37486 | 0.631985461  | 0.056973888 | 2.05E-27 | ATP6V1B2      | ATPase, H <sup>+</sup> transporting, lysosomal 56/58kDa, V1 subunit B2 [Source:HGNC Symbol;Acc:854]              |
| 1244 | ENSG00000174099 | 493.0914912 | -1.724462805 | 0.155526895 | 2.16E-27 | MSRB3         | methionine sulfoxide reductase B3 [Source:HGNC Symbol;Acc:27375]                                                 |
| 1245 | ENSG00000174885 | 182.8983021 | 4.03457307   | 0.363998754 | 2.25E-27 | NLRP6         | NLR family, pyrin domain containing 6 [Source:HGNC Symbol;Acc:22944]                                             |
| 1246 | ENSG00000115425 | 430.9644169 | -1.825741546 | 0.164718321 | 2.25E-27 | PECR          | peroxisomal trans-2-enoyl-CoA reductase [Source:HGNC Symbol;Acc:18281]                                           |
| 1247 | ENSG00000258311 | 901.0409975 | -1.306699006 | 0.117918051 | 2.32E-27 | RP11-644F5.10 | Uncharacterized protein [Source:UniProtKB/TrEMBL;Acc:F8VNQ1]                                                     |
| 1248 | ENSG00000159753 | 508.8535179 | 2.046916465  | 0.184747622 | 2.36E-27 | RLTPR         | RGD motif, leucine rich repeats, tropomodulin domain and proline-rich containing [Source:HGNC Symbol;Acc:27089]  |
| 1249 | ENSG00000206344 | 1536.040273 | 1.061363463  | 0.095803562 | 2.39E-27 | HCG27         | HLA complex group 27 (non-protein coding) [Source:HGNC Symbol;Acc:27366]                                         |
| 1250 | ENSG00000126878 | 117.0197481 | 3.534356874  | 0.319266517 | 2.62E-27 | AIF1L         | allograft inflammatory factor 1-like [Source:HGNC Symbol;Acc:28904]                                              |
| 1251 | ENSG00000137807 | 419.827828  | -1.847929799 | 0.166930204 | 2.62E-27 | KIF23         | kinesin family member 23 [Source:HGNC Symbol;Acc:6392]                                                           |
| 1252 | ENSG00000166803 | 401.8577014 | -1.808413119 | 0.163424597 | 2.75E-27 | KIAA0101      | KIAA0101 [Source:HGNC Symbol;Acc:28961]                                                                          |
| 1253 | ENSG00000089685 | 297.990714  | -2.072297106 | 0.187476224 | 3.14E-27 | BIRC5         | baculoviral IAP repeat containing 5 [Source:HGNC Symbol;Acc:593]                                                 |
| 1254 | ENSG00000198223 | 3008.010699 | -0.786230471 | 0.071142828 | 3.22E-27 | CSF2RA        | colony stimulating factor 2 receptor, alpha, low-affinity (granulocyte-macrophage) [Source:HGNC Symbol;Acc:2435] |

|      |                 |             |              |             |          |           |                                                                                                    |
|------|-----------------|-------------|--------------|-------------|----------|-----------|----------------------------------------------------------------------------------------------------|
| 1255 | ENSG00000105610 | 153.7174737 | -2.962202544 | 0.268142483 | 3.38E-27 | KLF1      | Kruppel-like factor 1 (erythroid) [Source:HGNC Symbol;Acc:6345]                                    |
| 1256 | ENSG00000011523 | 698.5714624 | 1.383890032  | 0.125285057 | 3.42E-27 | CEP68     | centrosomal protein 68kDa [Source:HGNC Symbol;Acc:29076]                                           |
| 1257 | ENSG00000058673 | 7070.486113 | 0.655328209  | 0.059350631 | 3.58E-27 | ZC3H11A   | zinc finger CCCH-type containing 11A [Source:HGNC Symbol;Acc:29093]                                |
| 1258 | ENSG00000155158 | 555.9572481 | 1.96583303   | 0.178044711 | 3.60E-27 | TTC39B    | tetratricopeptide repeat domain 39B [Source:HGNC Symbol;Acc:23704]                                 |
| 1259 | ENSG00000123975 | 329.2455356 | -1.980221729 | 0.179667668 | 4.47E-27 | CKS2      | CDC28 protein kinase regulatory subunit 2 [Source:HGNC Symbol;Acc:2000]                            |
| 1260 | ENSG00000170180 | 89.638984   | -4.20320571  | 0.381709039 | 4.99E-27 | GYP A     | glycophorin A (MNS blood group) [Source:HGNC Symbol;Acc:4702]                                      |
| 1261 | ENSG00000170486 | 183.020754  | 3.028611769  | 0.275187975 | 5.33E-27 | KRT72     | keratin 72 [Source:HGNC Symbol;Acc:28932]                                                          |
| 1262 | ENSG00000229358 | 522.260024  | -1.599313428 | 0.145319072 | 5.33E-27 | DPY19L1P1 | DPY19L1 pseudogene 1 [Source:HGNC Symbol;Acc:22395]                                                |
| 1263 | ENSG00000139318 | 3936.276709 | 0.716283084  | 0.065092707 | 5.41E-27 | DUSP6     | dual specificity phosphatase 6 [Source:HGNC Symbol;Acc:3072]                                       |
| 1264 | ENSG00000186185 | 350.6525788 | -2.072573976 | 0.18834981  | 5.42E-27 | KIF18B    | kinesin family member 18B [Source:HGNC Symbol;Acc:27102]                                           |
| 1265 | ENSG00000173801 | 233.8875489 | 2.380016006  | 0.21671844  | 6.90E-27 | JUP       | junction plakoglobin [Source:HGNC Symbol;Acc:6207]                                                 |
| 1266 | ENSG00000182957 | 2736.739103 | 0.911445818  | 0.083066708 | 7.66E-27 | SPATA13   | spermatogenesis associated 13 [Source:HGNC Symbol;Acc:23222]                                       |
| 1267 | ENSG00000123684 | 6479.22697  | -0.804400225 | 0.073313116 | 7.69E-27 | LPGAT1    | lysophosphatidylglycerol acyltransferase 1 [Source:HGNC Symbol;Acc:28985]                          |
| 1268 | ENSG00000182578 | 1535.676329 | 1.077291946  | 0.098199814 | 7.83E-27 | CSF1R     | colony stimulating factor 1 receptor [Source:HGNC Symbol;Acc:2433]                                 |
| 1269 | ENSG00000113504 | 531.9129407 | 1.872895385  | 0.170754785 | 8.00E-27 | SLC12A7   | solute carrier family 12 (potassium/chloride transporter), member 7 [Source:HGNC Symbol;Acc:10915] |
| 1270 | ENSG00000197321 | 3926.438414 | -0.788068703 | 0.071928773 | 9.14E-27 | SVIL      | supervillin [Source:HGNC Symbol;Acc:11480]                                                         |
| 1271 | ENSG00000143321 | 5159.78245  | -0.635347325 | 0.057992485 | 9.19E-27 | HDGF      | hepatoma-derived growth factor [Source:HGNC Symbol;Acc:4856]                                       |
| 1272 | ENSG00000111752 | 582.7618747 | 1.593263582  | 0.145500009 | 9.75E-27 | PHC1      | polyhomeotic homolog 1 (Drosophila) [Source:HGNC Symbol;Acc:3182]                                  |
| 1273 | ENSG00000137403 | 713.514564  | 1.645538914  | 0.150363906 | 1.05E-26 | HLA-F     | major histocompatibility complex, class I, F [Source:HGNC Symbol;Acc:4963]                         |
| 1274 | ENSG00000049239 | 2606.57089  | -0.827037212 | 0.075585215 | 1.07E-26 | H6PD      | hexose-6-phosphate dehydrogenase (glucose 1-dehydrogenase) [Source:HGNC Symbol;Acc:4795]           |
| 1275 | ENSG00000077809 | 12012.42464 | -0.539537511 | 0.049320627 | 1.10E-26 | GTF2I     | general transcription factor Iii [Source:HGNC Symbol;Acc:4659]                                     |
| 1276 | ENSG00000235750 | 2799.405807 | 0.854824416  | 0.078174376 | 1.15E-26 | KIAA0040  | KIAA0040 [Source:HGNC Symbol;Acc:28950]                                                            |
| 1277 | ENSG00000224940 | 615.5944163 | -1.674399474 | 0.153132174 | 1.16E-26 | PRRT4     | proline-rich transmembrane protein 4 [Source:HGNC Symbol;Acc:37280]                                |
| 1278 | ENSG00000138722 | 171.0450366 | 3.004212676  | 0.274768259 | 1.17E-26 | MMRN1     | multimerin 1 [Source:HGNC Symbol;Acc:7178]                                                         |
| 1279 | ENSG00000169679 | 254.3409235 | -2.389642676 | 0.21863232  | 1.21E-26 | BUB1      | BUB1 mitotic checkpoint serine/threonine kinase [Source:HGNC Symbol;Acc:1148]                      |
| 1280 | ENSG00000188761 | 712.4518969 | -1.53499426  | 0.140480854 | 1.26E-26 | BCL2L15   | BCL2-like 15 [Source:HGNC Symbol;Acc:33624]                                                        |
| 1281 | ENSG00000115310 | 5239.875181 | -0.695999084 | 0.063722897 | 1.32E-26 | RTN4      | reticulon 4 [Source:HGNC Symbol;Acc:14085]                                                         |
| 1282 | ENSG00000158985 | 4963.144957 | 0.73233081   | 0.067066723 | 1.36E-26 | CDC42SE2  | CDC42 small effector 2 [Source:HGNC Symbol;Acc:18547]                                              |

|      |                 |             |              |             |          |          |                                                                                                              |
|------|-----------------|-------------|--------------|-------------|----------|----------|--------------------------------------------------------------------------------------------------------------|
| 1283 | ENSG00000096968 | 1521.934347 | -1.031496753 | 0.094470163 | 1.37E-26 | JAK2     | Janus kinase 2 [Source:HGNC Symbol;Acc:6192]                                                                 |
| 1284 | ENSG00000197536 | 878.4115701 | 1.233015482  | 0.112943861 | 1.39E-26 | C5orf56  | chromosome 5 open reading frame 56 [Source:HGNC Symbol;Acc:33838]                                            |
| 1285 | ENSG00000184640 | 2709.676719 | 1.032592555  | 0.094685847 | 1.58E-26 | SEPT9    | septin 9 [Source:HGNC Symbol;Acc:7323]                                                                       |
| 1286 | ENSG00000104974 | 680.1991029 | 1.494992623  | 0.137128148 | 1.64E-26 | LILRA1   | leukocyte immunoglobulin-like receptor, subfamily A (with TM domain), member 1 [Source:HGNC Symbol;Acc:6602] |
| 1287 | ENSG00000271188 | 680.196557  | 1.494948286  | 0.137127723 | 1.64E-26 | LILRA1   | leukocyte immunoglobulin-like receptor, subfamily A (with TM domain), member 1 [Source:HGNC Symbol;Acc:6602] |
| 1288 | ENSG00000155130 | 2915.202174 | 0.754209103  | 0.069210278 | 1.72E-26 | MARCKS   | myristoylated alanine-rich protein kinase C substrate [Source:HGNC Symbol;Acc:6759]                          |
| 1289 | ENSG00000262462 | 680.0079241 | 1.493793109  | 0.137146749 | 1.83E-26 | LILRA1   | leukocyte immunoglobulin-like receptor, subfamily A (with TM domain), member 1 [Source:HGNC Symbol;Acc:6602] |
| 1290 | ENSG00000136305 | 1631.475722 | -0.938007587 | 0.086160912 | 1.94E-26 | CIDEB    | cell death-inducing DFFA-like effector b [Source:HGNC Symbol;Acc:1977]                                       |
| 1291 | ENSG00000261843 | 2710.02464  | 1.032799141  | 0.094879811 | 1.96E-26 | SEPT9    | septin 9 [Source:HGNC Symbol;Acc:7323]                                                                       |
| 1292 | ENSG00000232561 | 651.4303302 | -1.695452585 | 0.155869386 | 2.14E-26 | GTF2I1P1 | general transcription factor Ili, pseudogene 1 [Source:HGNC Symbol;Acc:4660]                                 |
| 1293 | ENSG00000034053 | 268.827118  | 2.508179875  | 0.230735859 | 2.31E-26 | APBA2    | amyloid beta (A4) precursor protein-binding, family A, member 2 [Source:HGNC Symbol;Acc:579]                 |
| 1294 | ENSG00000156052 | 5176.073739 | -0.687896251 | 0.063286031 | 2.33E-26 | GNAQ     | guanine nucleotide binding protein (G protein), q polypeptide [Source:HGNC Symbol;Acc:4390]                  |
| 1295 | ENSG00000104660 | 1487.073285 | 1.06798602   | 0.098325357 | 2.53E-26 | LEPROTL1 | leptin receptor overlapping transcript-like 1 [Source:HGNC Symbol;Acc:6555]                                  |
| 1296 | ENSG00000131370 | 3087.877137 | 0.751558213  | 0.069196081 | 2.55E-26 | SH3BP5   | SH3-domain binding protein 5 (BTK-associated) [Source:HGNC Symbol;Acc:10827]                                 |
| 1297 | ENSG00000170873 | 768.0177732 | 1.467882148  | 0.135200819 | 2.66E-26 | MTSS1    | metastasis suppressor 1 [Source:HGNC Symbol;Acc:20443]                                                       |
| 1298 | ENSG00000077044 | 4249.131073 | -0.887562002 | 0.081775836 | 2.76E-26 | DGKD     | diacylglycerol kinase, delta 130kDa [Source:HGNC Symbol;Acc:2851]                                            |
| 1299 | ENSG00000197448 | 3651.503111 | 0.733592194  | 0.067613109 | 2.88E-26 | GSTK1    | glutathione S-transferase kappa 1 [Source:HGNC Symbol;Acc:16906]                                             |
| 1300 | ENSG00000188647 | 3777.30141  | -0.760889862 | 0.070171004 | 3.09E-26 | PTAR1    | protein prenyltransferase alpha subunit repeat containing 1 [Source:HGNC Symbol;Acc:30449]                   |
| 1301 | ENSG00000196954 | 3809.528465 | 0.729334073  | 0.067292827 | 3.26E-26 | CASP4    | caspase 4, apoptosis-related cysteine peptidase [Source:HGNC Symbol;Acc:1505]                                |
| 1302 | ENSG00000004777 | 780.0230146 | -1.462332866 | 0.135083205 | 3.75E-26 | ARHGAP33 | Rho GTPase activating protein 33 [Source:HGNC Symbol;Acc:23085]                                              |
| 1303 | ENSG00000135334 | 2214.304693 | -0.82111299  | 0.075861459 | 3.81E-26 | AKIRIN2  | akirin 2 [Source:HGNC Symbol;Acc:21407]                                                                      |
| 1304 | ENSG00000147050 | 1561.366778 | -1.068033045 | 0.098743605 | 4.14E-26 | KDM6A    | lysine (K)-specific demethylase 6A [Source:HGNC Symbol;Acc:12637]                                            |
| 1305 | ENSG00000260199 | 287.238302  | 2.263915696  | 0.209343707 | 4.22E-26 | CCL3L3   | chemokine (C-C motif) ligand 3-like 3 [Source:HGNC Symbol;Acc:30554]                                         |
| 1306 | ENSG00000127564 | 314.9725465 | -1.977782126 | 0.182890135 | 4.23E-26 | PKMYT1   | protein kinase, membrane associated tyrosine/threonine 1 [Source:HGNC Symbol;Acc:29650]                      |
| 1307 | ENSG00000128272 | 6896.680562 | -0.587942061 | 0.054380162 | 4.34E-26 | ATF4     | activating transcription factor 4 [Source:HGNC Symbol;Acc:786]                                               |
| 1308 | ENSG00000216490 | 5510.40814  | 0.678944411  | 0.062845349 | 4.74E-26 | IFI30    | interferon, gamma-inducible protein 30 [Source:HGNC Symbol;Acc:5398]                                         |
| 1309 | ENSG00000221869 | 1433.041797 | 1.016413832  | 0.094215887 | 5.60E-26 | CEBPD    | CCAAT/enhancer binding protein (C/EBP), delta [Source:HGNC Symbol;Acc:1835]                                  |
| 1310 | ENSG00000166016 | 306.5566604 | -1.978191082 | 0.183381144 | 5.64E-26 | ABTB2    | ankyrin repeat and BTB (POZ) domain containing 2 [Source:HGNC Symbol;Acc:23842]                              |

|      |                 |             |              |             |          |               |                                                                                        |
|------|-----------------|-------------|--------------|-------------|----------|---------------|----------------------------------------------------------------------------------------|
| 1311 | ENSG00000163513 | 4813.715437 | 0.660651762  | 0.061266293 | 5.89E-26 | TGFBR2        | transforming growth factor, beta receptor II (70/80kDa) [Source:HGNC Symbol;Acc:11773] |
| 1312 | ENSG00000100292 | 688.8301592 | 1.53726523   | 0.142571077 | 5.94E-26 | HMOX1         | heme oxygenase (decycling) 1 [Source:HGNC Symbol;Acc:5013]                             |
| 1313 | ENSG00000142546 | 1034.055223 | 1.225183055  | 0.113642937 | 6.03E-26 | NOSIP         | nitric oxide synthase interacting protein [Source:HGNC Symbol;Acc:17946]               |
| 1314 | ENSG00000182173 | 541.684191  | 1.552345127  | 0.144077485 | 6.48E-26 | TSEN54        | TSEN54 tRNA splicing endonuclease subunit [Source:HGNC Symbol;Acc:27561]               |
| 1315 | ENSG00000184602 | 2706.727051 | 0.793425213  | 0.073655613 | 6.64E-26 | SNN           | stannin [Source:HGNC Symbol;Acc:11149]                                                 |
| 1316 | ENSG00000065675 | 517.8948597 | 1.671088694  | 0.155168642 | 6.82E-26 | PRKCC         | protein kinase C, theta [Source:HGNC Symbol;Acc:9410]                                  |
| 1317 | ENSG00000073737 | 979.4541902 | -1.189599874 | 0.110505937 | 7.15E-26 | DHRS9         | dehydrogenase/reductase (SDR family) member 9 [Source:HGNC Symbol;Acc:16888]           |
| 1318 | ENSG00000144815 | 1502.800168 | -1.044759731 | 0.097058939 | 7.21E-26 | NXPE3         | neurexophilin and PC-esterase domain family, member 3 [Source:HGNC Symbol;Acc:28238]   |
| 1319 | ENSG00000102245 | 257.1709733 | 2.522890199  | 0.234507011 | 7.69E-26 | CD40LG        | CD40 ligand [Source:HGNC Symbol;Acc:11935]                                             |
| 1320 | ENSG00000143799 | 1797.460748 | 0.893049621  | 0.083055704 | 8.18E-26 | PARP1         | poly (ADP-ribose) polymerase 1 [Source:HGNC Symbol;Acc:270]                            |
| 1321 | ENSG00000145386 | 341.083224  | -1.973872313 | 0.183578143 | 8.20E-26 | CCNA2         | cyclin A2 [Source:HGNC Symbol;Acc:1578]                                                |
| 1322 | ENSG00000010292 | 2377.40683  | -1.002344648 | 0.093283212 | 8.84E-26 | NCAPD2        | non-SMC condensin I complex, subunit D2 [Source:HGNC Symbol;Acc:24305]                 |
| 1323 | ENSG00000085563 | 289.8194944 | 2.774513307  | 0.258451849 | 9.85E-26 | ABCB1         | ATP-binding cassette, sub-family B (MDR/TAP), member 1 [Source:HGNC Symbol;Acc:40]     |
| 1324 | ENSG00000243719 | 261.8899176 | 2.22506916   | 0.207309766 | 1.01E-25 | HLA-DMA       | major histocompatibility complex, class II, DM alpha [Source:HGNC Symbol;Acc:4934]     |
| 1325 | ENSG00000089157 | 14445.68965 | 0.502168436  | 0.046791775 | 1.02E-25 | RPLP0         | ribosomal protein, large, P0 [Source:HGNC Symbol;Acc:10371]                            |
| 1326 | ENSG00000242685 | 261.885929  | 2.224920388  | 0.207321221 | 1.02E-25 | HLA-DMA       | major histocompatibility complex, class II, DM alpha [Source:HGNC Symbol;Acc:4934]     |
| 1327 | ENSG00000173110 | 3690.455901 | 0.776316897  | 0.072340246 | 1.02E-25 | HSPA6         | heat shock 70kDa protein 6 (HSP70B') [Source:HGNC Symbol;Acc:5239]                     |
| 1328 | ENSG00000243189 | 261.7656176 | 2.224119122  | 0.207309447 | 1.05E-25 | HLA-DMA       | major histocompatibility complex, class II, DM alpha [Source:HGNC Symbol;Acc:4934]     |
| 1329 | ENSG00000117322 | 327.7247322 | 1.996459549  | 0.186091142 | 1.05E-25 | CR2           | complement component (3d/Epstein Barr virus) receptor 2 [Source:HGNC Symbol;Acc:2336]  |
| 1330 | ENSG00000054967 | 2268.421167 | -0.862584997 | 0.080404394 | 1.06E-25 | RELT          | RELT tumor necrosis factor receptor [Source:HGNC Symbol;Acc:13764]                     |
| 1331 | ENSG00000068796 | 824.9711112 | 1.261338974  | 0.117580988 | 1.06E-25 | KIF2A         | kinesin heavy chain member 2A [Source:HGNC Symbol;Acc:6318]                            |
| 1332 | ENSG00000163512 | 1246.579891 | -1.045965342 | 0.097563302 | 1.14E-25 | AZ12          | 5-azacytidine induced 2 [Source:HGNC Symbol;Acc:24002]                                 |
| 1333 | ENSG00000243215 | 262.0296192 | 2.224865572  | 0.207526579 | 1.14E-25 | HLA-DMA       | major histocompatibility complex, class II, DM alpha [Source:HGNC Symbol;Acc:4934]     |
| 1334 | ENSG00000140511 | 250.514016  | 2.380547363  | 0.222053781 | 1.14E-25 | HAPLN3        | hyaluronan and proteoglycan link protein 3 [Source:HGNC Symbol;Acc:21446]              |
| 1335 | ENSG00000162368 | 1527.843325 | 1.029499776  | 0.096049392 | 1.17E-25 | CMPK1         | cytidine monophosphate (UMP-CMP) kinase 1, cytosolic [Source:HGNC Symbol;Acc:18170]    |
| 1336 | ENSG00000239463 | 261.8984535 | 2.223769362  | 0.207531958 | 1.21E-25 | HLA-DMA       | major histocompatibility complex, class II, DM alpha [Source:HGNC Symbol;Acc:4934]     |
| 1337 | ENSG00000106327 | 208.330992  | -2.685070086 | 0.250798366 | 1.33E-25 | TFR2          | transferrin receptor 2 [Source:HGNC Symbol;Acc:11762]                                  |
| 1338 | ENSG00000225720 | 153.2861043 | -2.862803459 | 0.267410595 | 1.34E-25 | RP4-742C19.12 |                                                                                        |

|      |                 |             |              |             |          |                |                                                                                                      |
|------|-----------------|-------------|--------------|-------------|----------|----------------|------------------------------------------------------------------------------------------------------|
| 1339 | ENSG00000023330 | 1886.186409 | -0.887498465 | 0.082916929 | 1.37E-25 | ALAS1          | aminolevulinate, delta-, synthase 1 [Source:HGNC Symbol;Acc:396]                                     |
| 1340 | ENSG00000115459 | 1221.646766 | -1.10315706  | 0.10308607  | 1.40E-25 | ELMOD3         | ELMO/CED-12 domain containing 3 [Source:HGNC Symbol;Acc:26158]                                       |
| 1341 | ENSG00000088992 | 780.8868832 | -1.449068622 | 0.13543634  | 1.43E-25 | TESC           | tescalcin [Source:HGNC Symbol;Acc:26065]                                                             |
| 1342 | ENSG00000064419 | 1510.901637 | -0.964930399 | 0.090245803 | 1.54E-25 | TNPO3          | transportin 3 [Source:HGNC Symbol;Acc:17103]                                                         |
| 1343 | ENSG00000115738 | 4192.505063 | -0.678044666 | 0.063454014 | 1.66E-25 | ID2            | inhibitor of DNA binding 2, dominant negative helix-loop-helix protein [Source:HGNC Symbol;Acc:5361] |
| 1344 | ENSG00000129173 | 207.9229364 | -2.437222884 | 0.228147357 | 1.71E-25 | E2F8           | E2F transcription factor 8 [Source:HGNC Symbol;Acc:24727]                                            |
| 1345 | ENSG00000035403 | 5171.257084 | -0.650102279 | 0.0608665   | 1.74E-25 | VCL            | vinculin [Source:HGNC Symbol;Acc:12665]                                                              |
| 1346 | ENSG00000007402 | 250.5441228 | 2.543336185  | 0.238146613 | 1.76E-25 | CACNA2D2       | calcium channel, voltage-dependent, alpha 2/delta subunit 2 [Source:HGNC Symbol;Acc:1400]            |
| 1347 | ENSG00000176358 | 257.2158212 | -2.249162337 | 0.210873857 | 2.04E-25 | TAC4           | tachykinin 4 (hemokinin) [Source:HGNC Symbol;Acc:16641]                                              |
| 1348 | ENSG00000197102 | 3475.053567 | 0.781294183  | 0.073354771 | 2.40E-25 | DYNC1H1        | dynein, cytoplasmic 1, heavy chain 1 [Source:HGNC Symbol;Acc:2961]                                   |
| 1349 | ENSG00000147443 | 718.5859869 | 1.477045225  | 0.138711701 | 2.46E-25 | DOK2           | docking protein 2, 56kDa [Source:HGNC Symbol;Acc:2991]                                               |
| 1350 | ENSG00000149798 | 482.0553763 | 1.919598819  | 0.180446366 | 2.75E-25 | CDC42EP2       | CDC42 effector protein (Rho GTPase binding) 2 [Source:HGNC Symbol;Acc:16263]                         |
| 1351 | ENSG00000131828 | 1600.288007 | -0.916533963 | 0.086195829 | 2.89E-25 | PDHA1          | pyruvate dehydrogenase (lipoamide) alpha 1 [Source:HGNC Symbol;Acc:8806]                             |
| 1352 | ENSG00000164597 | 782.5758165 | -1.256905614 | 0.118254269 | 3.03E-25 | COG5           | component of oligomeric golgi complex 5 [Source:HGNC Symbol;Acc:14857]                               |
| 1353 | ENSG00000100077 | 883.9372932 | 1.282416171  | 0.120683465 | 3.11E-25 | ADRBK2         | adrenergic, beta, receptor kinase 2 [Source:HGNC Symbol;Acc:290]                                     |
| 1354 | ENSG00000198879 | 414.5097327 | 1.765412148  | 0.166145673 | 3.13E-25 | SFMBT2         | Scm-like with four mbt domains 2 [Source:HGNC Symbol;Acc:20256]                                      |
| 1355 | ENSG00000160746 | 823.8623792 | -1.293361178 | 0.121733389 | 3.16E-25 | ANO10          | anoctamin 10 [Source:HGNC Symbol;Acc:25519]                                                          |
| 1356 | ENSG00000169567 | 1934.72044  | 0.919389472  | 0.08655255  | 3.24E-25 | HINT1          | histidine triad nucleotide binding protein 1 [Source:HGNC Symbol;Acc:4912]                           |
| 1357 | ENSG00000177272 | 305.1714691 | 2.18025378   | 0.205264711 | 3.26E-25 | KCNA3          | potassium voltage-gated channel, shaker-related subfamily, member 3 [Source:HGNC Symbol;Acc:6221]    |
| 1358 | ENSG00000163328 | 621.3614273 | 1.61806576   | 0.152393819 | 3.40E-25 | GPR155         | G protein-coupled receptor 155 [Source:HGNC Symbol;Acc:22951]                                        |
| 1359 | ENSG00000005059 | 447.0626768 | 1.78535249   | 0.168182286 | 3.47E-25 | CCDC109B       | coiled-coil domain containing 109B [Source:HGNC Symbol;Acc:26076]                                    |
| 1360 | ENSG00000105856 | 2714.910432 | 0.785448486  | 0.074023802 | 3.65E-25 | HBP1           | HMG-box transcription factor 1 [Source:HGNC Symbol;Acc:23200]                                        |
| 1361 | ENSG00000007314 | 80.38264889 | 4.385177593  | 0.413489219 | 3.87E-25 | SCN4A          | sodium channel, voltage-gated, type IV, alpha subunit [Source:HGNC Symbol;Acc:10591]                 |
| 1362 | ENSG00000272916 | 1148.346131 | -1.479649878 | 0.139579501 | 4.06E-25 | RP11-574K11.31 | Bifunctional heparan sulfate N-deacetylase/N-sulfotransferase 2 [Source:UniProtKB/TrEMBL;Acc:S4R438] |
| 1363 | ENSG00000196588 | 2726.593273 | -1.01664807  | 0.095953486 | 4.31E-25 | MKL1           | megakaryoblastic leukemia (translocation) 1 [Source:HGNC Symbol;Acc:14334]                           |
| 1364 | ENSG00000171316 | 1711.930164 | -0.982703546 | 0.092768579 | 4.40E-25 | CHD7           | chromodomain helicase DNA binding protein 7 [Source:HGNC Symbol;Acc:20626]                           |
| 1365 | ENSG00000112182 | 464.1079904 | 1.770299042  | 0.167287026 | 4.93E-25 | BACH2          | BTB and CNC homology 1, basic leucine zipper transcription factor 2 [Source:HGNC Symbol;Acc:14078]   |
| 1366 | ENSG00000173825 | 220.9426966 | 2.810166498  | 0.265625199 | 5.08E-25 | TIGD3          | tigger transposable element derived 3 [Source:HGNC Symbol;Acc:18334]                                 |

|      |                 |             |              |             |          |          |                                                                                         |
|------|-----------------|-------------|--------------|-------------|----------|----------|-----------------------------------------------------------------------------------------|
| 1367 | ENSG00000196456 | 479.3918844 | 1.794563812  | 0.169635999 | 5.11E-25 | ZNF775   | zinc finger protein 775 [Source:HGNC Symbol;Acc:28501]                                  |
| 1368 | ENSG00000161921 | 823.180642  | 1.254752389  | 0.118853097 | 6.44E-25 | CXCL16   | chemokine (C-X-C motif) ligand 16 [Source:HGNC Symbol;Acc:16642]                        |
| 1369 | ENSG00000158457 | 217.6835121 | 2.488674055  | 0.235850135 | 6.80E-25 | TSPAN33  | tetraspanin 33 [Source:HGNC Symbol;Acc:28743]                                           |
| 1370 | ENSG00000183918 | 347.2768046 | 2.08772874   | 0.19799078  | 7.35E-25 | SH2D1A   | SH2 domain containing 1A [Source:HGNC Symbol;Acc:10820]                                 |
| 1371 | ENSG00000067066 | 3743.536559 | -0.77535072  | 0.07362148  | 8.43E-25 | SP100    | SP100 nuclear antigen [Source:HGNC Symbol;Acc:11206]                                    |
| 1372 | ENSG00000066294 | 1102.153901 | 1.180604189  | 0.112288243 | 1.02E-24 | CD84     | CD84 molecule [Source:HGNC Symbol;Acc:1704]                                             |
| 1373 | ENSG00000076944 | 5986.063809 | -0.768969004 | 0.073138054 | 1.02E-24 | STXBP2   | syntaxin binding protein 2 [Source:HGNC Symbol;Acc:11445]                               |
| 1374 | ENSG00000166900 | 8525.863818 | -0.697196686 | 0.06637596  | 1.13E-24 | STX3     | syntaxin 3 [Source:HGNC Symbol;Acc:11438]                                               |
| 1375 | ENSG00000103522 | 247.403355  | 2.492362037  | 0.237348531 | 1.17E-24 | IL21R    | interleukin 21 receptor [Source:HGNC Symbol;Acc:6006]                                   |
| 1376 | ENSG00000130695 | 877.2865403 | -1.21209019  | 0.115451243 | 1.19E-24 | CEP85    | centrosomal protein 85kDa [Source:HGNC Symbol;Acc:25309]                                |
| 1377 | ENSG00000147168 | 8595.958442 | 0.578072648  | 0.055124207 | 1.35E-24 | IL2RG    | interleukin 2 receptor, gamma [Source:HGNC Symbol;Acc:6010]                             |
| 1378 | ENSG00000084234 | 8532.690398 | -0.54384654  | 0.05188612  | 1.43E-24 | APLP2    | amyloid beta (A4) precursor-like protein 2 [Source:HGNC Symbol;Acc:598]                 |
| 1379 | ENSG00000152061 | 2608.48091  | 0.81224633   | 0.077512904 | 1.47E-24 | RABGAP1L | RAB GTPase activating protein 1-like [Source:HGNC Symbol;Acc:24663]                     |
| 1380 | ENSG00000145491 | 398.9410215 | -1.691733527 | 0.161648971 | 1.69E-24 | ROPN1L   | rhopilin associated tail protein 1-like [Source:HGNC Symbol;Acc:24060]                  |
| 1381 | ENSG00000044446 | 2231.025108 | -0.861230626 | 0.082359219 | 1.84E-24 | PHKA2    | phosphorylase kinase, alpha 2 (liver) [Source:HGNC Symbol;Acc:8926]                     |
| 1382 | ENSG00000163421 | 2906.137788 | -0.776872439 | 0.074336966 | 1.97E-24 | PROK2    | prokineticin 2 [Source:HGNC Symbol;Acc:18455]                                           |
| 1383 | ENSG00000187446 | 2551.02872  | -0.783246932 | 0.074983584 | 2.08E-24 | CHP1     | calcineurin-like EF-hand protein 1 [Source:HGNC Symbol;Acc:17433]                       |
| 1384 | ENSG00000115318 | 840.3039598 | -1.224143532 | 0.117239907 | 2.17E-24 | LOXL3    | lysyl oxidase-like 3 [Source:HGNC Symbol;Acc:13869]                                     |
| 1385 | ENSG00000015413 | 87.52294017 | 5.039717812  | 0.483208446 | 2.45E-24 | DPEP1    | dipeptidase 1 (renal) [Source:HGNC Symbol;Acc:3002]                                     |
| 1386 | ENSG00000079393 | 226.7212267 | -2.332036143 | 0.223652073 | 2.52E-24 | DUSP13   | dual specificity phosphatase 13 [Source:HGNC Symbol;Acc:19681]                          |
| 1387 | ENSG00000181045 | 345.9021242 | 2.262379775  | 0.217068692 | 2.64E-24 | SLC26A11 | solute carrier family 26 (anion exchanger), member 11 [Source:HGNC Symbol;Acc:14471]    |
| 1388 | ENSG00000115604 | 745.8293021 | -1.274791418 | 0.122314617 | 2.65E-24 | IL18R1   | interleukin 18 receptor 1 [Source:HGNC Symbol;Acc:5988]                                 |
| 1389 | ENSG00000171236 | 2101.690031 | -0.856401839 | 0.082199116 | 2.75E-24 | LRG1     | leucine-rich alpha-2-glycoprotein 1 [Source:HGNC Symbol;Acc:29480]                      |
| 1390 | ENSG00000163808 | 233.5087682 | -2.368646171 | 0.227413267 | 2.83E-24 | KIF15    | kinesin family member 15 [Source:HGNC Symbol;Acc:17273]                                 |
| 1391 | ENSG00000150867 | 3511.645589 | 0.697738441  | 0.066991948 | 2.84E-24 | PIP4K2A  | phosphatidylinositol-5-phosphate 4-kinase, type II, alpha [Source:HGNC Symbol;Acc:8997] |
| 1392 | ENSG00000101577 | 3884.673373 | 0.741573835  | 0.071209603 | 2.88E-24 | LPIN2    | lipin 2 [Source:HGNC Symbol;Acc:14450]                                                  |
| 1393 | ENSG00000138326 | 12781.4226  | 0.519493532  | 0.049895626 | 2.95E-24 | RPS24    | ribosomal protein S24 [Source:HGNC Symbol;Acc:10411]                                    |
| 1394 | ENSG00000165659 | 294.0389634 | -1.940802211 | 0.186570685 | 3.24E-24 | DACH1    | dachshund homolog 1 (Drosophila) [Source:HGNC Symbol;Acc:2663]                          |



|      |                 |             |              |             |          |          |                                                                                                                              |
|------|-----------------|-------------|--------------|-------------|----------|----------|------------------------------------------------------------------------------------------------------------------------------|
| 1395 | ENSG00000232962 | 197.5637676 | 3.323596138  | 0.319571652 | 3.32E-24 | HLA-DOA  | major histocompatibility complex, class II, DO alpha [Source:HGNC Symbol;Acc:4936]                                           |
| 1396 | ENSG00000100911 | 1489.424535 | 0.931304778  | 0.089590163 | 3.50E-24 | PSME2    | proteasome (prosome, macropain) activator subunit 2 (PA28 beta) [Source:HGNC Symbol;Acc:9569]                                |
| 1397 | ENSG00000108389 | 2359.664772 | -0.929997485 | 0.089535588 | 3.81E-24 | MTMR4    | myotubularin related protein 4 [Source:HGNC Symbol;Acc:7452]                                                                 |
| 1398 | ENSG00000084733 | 3378.205156 | -0.795888248 | 0.076689803 | 4.18E-24 | RAB10    | RAB10, member RAS oncogene family [Source:HGNC Symbol;Acc:9759]                                                              |
| 1399 | ENSG00000163013 | 361.5750228 | 1.793875491  | 0.172968706 | 4.49E-24 | FBXO41   | F-box protein 41 [Source:HGNC Symbol;Acc:29409]                                                                              |
| 1400 | ENSG00000071127 | 11071.28856 | -0.493825737 | 0.047625923 | 4.59E-24 | WDR1     | WD repeat domain 1 [Source:HGNC Symbol;Acc:12754]                                                                            |
| 1401 | ENSG00000107290 | 5277.68282  | 0.606552458  | 0.058511384 | 4.71E-24 | SETX     | senataxin [Source:HGNC Symbol;Acc:445]                                                                                       |
| 1402 | ENSG00000137871 | 1571.614723 | -0.997988652 | 0.096309002 | 4.91E-24 | ZNF280D  | zinc finger protein 280D [Source:HGNC Symbol;Acc:25953]                                                                      |
| 1403 | ENSG00000065054 | 80.00906064 | 4.396055703  | 0.424255462 | 4.93E-24 | SLC9A3R2 | solute carrier family 9, subfamily A (NHE3, cation proton antiporter 3), member 3 regulator 2 [Source:HGNC Symbol;Acc:11076] |
| 1404 | ENSG00000197540 | 138.7613898 | 3.451848599  | 0.333204194 | 5.05E-24 | GZMM     | granzyme M (lymphocyte met-ase 1) [Source:HGNC Symbol;Acc:4712]                                                              |
| 1405 | ENSG00000197451 | 1627.418326 | -0.933101682 | 0.090094787 | 5.19E-24 | HNRNPAB  | heterogeneous nuclear ribonucleoprotein A/B [Source:HGNC Symbol;Acc:5034]                                                    |
| 1406 | ENSG00000061938 | 3104.575659 | -1.046039443 | 0.101007887 | 5.23E-24 | TNK2     | tyrosine kinase, non-receptor, 2 [Source:HGNC Symbol;Acc:19297]                                                              |
| 1407 | ENSG00000143376 | 3175.351613 | -0.744495534 | 0.071908623 | 5.37E-24 | SNX27    | sorting nexin family member 27 [Source:HGNC Symbol;Acc:20073]                                                                |
| 1408 | ENSG00000087586 | 205.540838  | -2.465601738 | 0.238276658 | 5.70E-24 | AURKA    | aurora kinase A [Source:HGNC Symbol;Acc:11393]                                                                               |
| 1409 | ENSG00000140678 | 19131.48546 | 0.633496034  | 0.061241413 | 5.90E-24 | ITGAX    | integrin, alpha X (complement component 3 receptor 4 subunit) [Source:HGNC Symbol;Acc:6152]                                  |
| 1410 | ENSG00000178988 | 1214.749675 | 1.056692065  | 0.10221112  | 6.27E-24 | MRFAP1L1 | Morf4 family associated protein 1-like 1 [Source:HGNC Symbol;Acc:28796]                                                      |
| 1411 | ENSG00000101782 | 3237.970544 | -0.802782088 | 0.077673983 | 6.47E-24 | RIOK3    | RIO kinase 3 [Source:HGNC Symbol;Acc:11451]                                                                                  |
| 1412 | ENSG00000163406 | 803.5911294 | -1.390021528 | 0.134501428 | 6.51E-24 | SLC15A2  | solute carrier family 15 (oligopeptide transporter), member 2 [Source:HGNC Symbol;Acc:10921]                                 |
| 1413 | ENSG00000186480 | 720.3269954 | 1.36630736   | 0.132225238 | 6.61E-24 | INSIG1   | insulin induced gene 1 [Source:HGNC Symbol;Acc:6083]                                                                         |
| 1414 | ENSG00000127328 | 744.2813025 | -1.430682913 | 0.138539528 | 7.05E-24 | RAB3IP   | RAB3A interacting protein [Source:HGNC Symbol;Acc:16508]                                                                     |
| 1415 | ENSG00000100129 | 4870.889004 | 0.691658384  | 0.067006068 | 7.39E-24 | EIF3L    | eukaryotic translation initiation factor 3, subunit L [Source:HGNC Symbol;Acc:18138]                                         |
| 1416 | ENSG00000013364 | 3664.872998 | 0.815650329  | 0.079031511 | 7.52E-24 | MVP      | major vault protein [Source:HGNC Symbol;Acc:7531]                                                                            |
| 1417 | ENSG00000164088 | 3865.021688 | -0.658027387 | 0.063801467 | 8.07E-24 | PPM1M    | protein phosphatase, Mg <sup>2+</sup> /Mn <sup>2+</sup> dependent, 1M [Source:HGNC Symbol;Acc:26506]                         |
| 1418 | ENSG00000013374 | 1727.839773 | 0.900077192  | 0.087286307 | 8.23E-24 | NUB1     | negative regulator of ubiquitin-like proteins 1 [Source:HGNC Symbol;Acc:17623]                                               |
| 1419 | ENSG00000197930 | 3379.550509 | -0.69787314  | 0.067682373 | 8.29E-24 | ERO1L    | ERO1-like (S. cerevisiae) [Source:HGNC Symbol;Acc:13280]                                                                     |
| 1420 | ENSG00000266173 | 2001.764629 | -0.814329159 | 0.079030106 | 8.90E-24 | STRADA   | STE20-related kinase adaptor alpha [Source:HGNC Symbol;Acc:30172]                                                            |
| 1421 | ENSG00000118503 | 1995.867101 | 0.822686062  | 0.079847855 | 8.98E-24 | TNFAIP3  | tumor necrosis factor, alpha-induced protein 3 [Source:HGNC Symbol;Acc:11896]                                                |
| 1422 | ENSG00000263077 | 14015.99078 | -0.728053928 | 0.070665769 | 9.01E-24 | DDX5     | DEAD (Asp-Glu-Ala-Asp) box helicase 5 [Source:HGNC Symbol;Acc:2746]                                                          |

|      |                 |             |              |             |          |              |                                                                                       |
|------|-----------------|-------------|--------------|-------------|----------|--------------|---------------------------------------------------------------------------------------|
| 1423 | ENSG00000124201 | 2899.16195  | 0.753535768  | 0.07315454  | 9.21E-24 | ZNF1         | zinc finger, NFX1-type containing 1 [Source:HGNC Symbol;Acc:29271]                    |
| 1424 | ENSG00000103381 | 5249.387224 | 0.658464926  | 0.06393902  | 9.42E-24 | CPPE1        | calcineurin-like phosphoesterase domain containing 1 [Source:HGNC Symbol;Acc:25632]   |
| 1425 | ENSG00000116489 | 8451.424268 | -0.675494066 | 0.065643298 | 1.02E-23 | CAPZA1       | capping protein (actin filament) muscle Z-line, alpha 1 [Source:HGNC Symbol;Acc:1488] |
| 1426 | ENSG00000116017 | 1951.811781 | -1.06619597  | 0.10369968  | 1.12E-23 | ARID3A       | AT rich interactive domain 3A (BRIGHT-like) [Source:HGNC Symbol;Acc:3031]             |
| 1427 | ENSG00000133313 | 1406.980424 | 0.94545855   | 0.092034272 | 1.22E-23 | CNDP2        | CNDP dipeptidase 2 (metallopeptidase M20 family) [Source:HGNC Symbol;Acc:24437]       |
| 1428 | ENSG00000138031 | 293.322484  | 2.162246255  | 0.21072924  | 1.39E-23 | ADCY3        | adenylate cyclase 3 [Source:HGNC Symbol;Acc:234]                                      |
| 1429 | ENSG00000100485 | 3775.344431 | -0.713151454 | 0.069577515 | 1.55E-23 | SOS2         | son of sevenless homolog 2 (Drosophila) [Source:HGNC Symbol;Acc:11188]                |
| 1430 | ENSG00000111802 | 2235.483169 | 0.824462547  | 0.080443605 | 1.57E-23 | TDP2         | tyrosyl-DNA phosphodiesterase 2 [Source:HGNC Symbol;Acc:17768]                        |
| 1431 | ENSG00000105778 | 2210.226867 | -0.847994257 | 0.0827828   | 1.65E-23 | AVL9         | AVL9 homolog ( <i>S. cerevisiae</i> ) [Source:HGNC Symbol;Acc:28994]                  |
| 1432 | ENSG00000148926 | 396.5847998 | -1.65004321  | 0.161210658 | 1.80E-23 | ADM          | adrenomedullin [Source:HGNC Symbol;Acc:259]                                           |
| 1433 | ENSG00000113742 | 3064.327821 | -0.991375927 | 0.096950879 | 1.99E-23 | CPEB4        | cytoplasmic polyadenylation element binding protein 4 [Source:HGNC Symbol;Acc:21747]  |
| 1434 | ENSG00000147206 | 479.9651801 | -1.612138749 | 0.157782202 | 2.16E-23 | NXF3         | nuclear RNA export factor 3 [Source:HGNC Symbol;Acc:8073]                             |
| 1435 | ENSG00000239665 | 1524.653475 | -0.923207772 | 0.090385874 | 2.24E-23 | RP11-295P9.3 | Uncharacterized protein [Source:UniProtKB/TrEMBL;Acc:MQQX3]                           |
| 1436 | ENSG00000116213 | 1665.489408 | -1.17468303  | 0.11507501  | 2.38E-23 | WRAP73       | WD repeat containing, antisense to TP73 [Source:HGNC Symbol;Acc:12759]                |
| 1437 | ENSG00000259824 | 120.9098479 | 3.426703201  | 0.335821797 | 2.48E-23 | TRBV12-4     | T cell receptor beta variable 12-4 [Source:HGNC Symbol;Acc:12186]                     |
| 1438 | ENSG00000148218 | 1535.859041 | -0.985816397 | 0.096630243 | 2.53E-23 | ALAD         | aminolevulinate dehydratase [Source:HGNC Symbol;Acc:395]                              |
| 1439 | ENSG00000135272 | 583.6852533 | 1.70688618   | 0.167457857 | 2.77E-23 | MDFIC        | MyoD family inhibitor domain containing [Source:HGNC Symbol;Acc:28870]                |
| 1440 | ENSG00000173239 | 116.965303  | -3.215382311 | 0.315645948 | 2.96E-23 | LIPM         | lipase, family member M [Source:HGNC Symbol;Acc:23455]                                |
| 1441 | ENSG00000152558 | 5486.169065 | 0.639638739  | 0.062799579 | 2.99E-23 | TMEM123      | transmembrane protein 123 [Source:HGNC Symbol;Acc:30138]                              |
| 1442 | ENSG00000154874 | 476.6128206 | -1.645945857 | 0.161626023 | 3.04E-23 | CCDC144B     | coiled-coil domain containing 144B (pseudogene) [Source:HGNC Symbol;Acc:26704]        |
| 1443 | ENSG00000171603 | 1668.072365 | 0.989873203  | 0.09734333  | 3.54E-23 | CLSTN1       | calysntenin 1 [Source:HGNC Symbol;Acc:17447]                                          |
| 1444 | ENSG00000159374 | 435.1846261 | -1.582953135 | 0.155698832 | 3.62E-23 | M1AP         | meiosis 1 associated protein [Source:HGNC Symbol;Acc:25183]                           |
| 1445 | ENSG00000136068 | 1143.126586 | 2.777228551  | 0.273188265 | 3.64E-23 | FLNB         | filamin B, beta [Source:HGNC Symbol;Acc:3755]                                         |
| 1446 | ENSG00000129824 | 3591.02173  | 0.770838959  | 0.07594354  | 4.28E-23 | RPS4Y1       | ribosomal protein S4, Y-linked 1 [Source:HGNC Symbol;Acc:10425]                       |
| 1447 | ENSG00000165097 | 1664.524882 | -0.896032253 | 0.088284131 | 4.31E-23 | KDM1B        | lysine (K)-specific demethylase 1B [Source:HGNC Symbol;Acc:21577]                     |
| 1448 | ENSG00000018510 | 1695.676978 | -1.044119591 | 0.102940128 | 4.60E-23 | AGPS         | alkylglycerone phosphate synthase [Source:HGNC Symbol;Acc:327]                        |
| 1449 | ENSG00000130255 | 2792.32276  | 1.04822718   | 0.103492008 | 5.33E-23 | RPL36        | ribosomal protein L36 [Source:HGNC Symbol;Acc:13631]                                  |
| 1450 | ENSG00000106462 | 802.8579976 | -1.200518065 | 0.118542526 | 5.39E-23 | EZH2         | enhancer of zeste homolog 2 (Drosophila) [Source:HGNC Symbol;Acc:3527]                |

|      |                 |             |              |             |          |           |                                                                                                                 |
|------|-----------------|-------------|--------------|-------------|----------|-----------|-----------------------------------------------------------------------------------------------------------------|
| 1451 | ENSG00000003147 | 709.3342082 | -1.498980231 | 0.148124453 | 5.82E-23 | ICA1      | islet cell autoantigen 1, 69kDa [Source:HGNC Symbol;Acc:5343]                                                   |
| 1452 | ENSG00000183542 | 188.7076813 | 2.776745652  | 0.274569087 | 6.23E-23 | KLRC4     | killer cell lectin-like receptor subfamily C, member 4 [Source:HGNC Symbol;Acc:6377]                            |
| 1453 | ENSG00000183569 | 161.9535574 | 2.64810701   | 0.261891052 | 6.33E-23 | SERHL2    | serine hydrolase-like 2 [Source:HGNC Symbol;Acc:29446]                                                          |
| 1454 | ENSG00000169242 | 85.85731003 | 3.81354262   | 0.377456752 | 6.88E-23 | EFNA1     | ephrin-A1 [Source:HGNC Symbol;Acc:3221]                                                                         |
| 1455 | ENSG00000055917 | 3860.277122 | 0.687438341  | 0.068063385 | 7.11E-23 | PUM2      | pumilio RNA-binding family member 2 [Source:HGNC Symbol;Acc:14958]                                              |
| 1456 | ENSG00000105339 | 12076.55318 | -0.472303715 | 0.04676374  | 7.12E-23 | DENND3    | DENN/MADD domain containing 3 [Source:HGNC Symbol;Acc:29134]                                                    |
| 1457 | ENSG00000121152 | 228.4100254 | -2.241926316 | 0.222118096 | 7.59E-23 | NCAPH     | non-SMC condensin I complex, subunit H [Source:HGNC Symbol;Acc:1112]                                            |
| 1458 | ENSG00000104946 | 952.8516176 | 1.17640684   | 0.116583301 | 7.80E-23 | TBC1D17   | TBC1 domain family, member 17 [Source:HGNC Symbol;Acc:25699]                                                    |
| 1459 | ENSG0000024048  | 4911.393232 | 0.632211865  | 0.062656457 | 7.84E-23 | UBR2      | ubiquitin protein ligase E3 component n-recognin 2 [Source:HGNC Symbol;Acc:21289]                               |
| 1460 | ENSG00000104081 | 839.875103  | 1.362303175  | 0.135057882 | 8.10E-23 | BMF       | Bcl2 modifying factor [Source:HGNC Symbol;Acc:24132]                                                            |
| 1461 | ENSG00000107798 | 730.0986137 | 1.275109131  | 0.126428957 | 8.20E-23 | LIPA      | lipase A, lysosomal acid, cholesterol esterase [Source:HGNC Symbol;Acc:6617]                                    |
| 1462 | ENSG00000120278 | 209.7181139 | 2.700240939  | 0.268086486 | 9.38E-23 | PLEKHG1   | pleckstrin homology domain containing, family G (with RhoGef domain) member 1 [Source:HGNC Symbol;Acc:20884]    |
| 1463 | ENSG00000196821 | 1894.196886 | 0.829389591  | 0.082369319 | 9.67E-23 | C6orf106  | chromosome 6 open reading frame 106 [Source:HGNC Symbol;Acc:21215]                                              |
| 1464 | ENSG00000164611 | 375.4867396 | -1.67737597  | 0.16667136  | 1.02E-22 | PTTG1     | pituitary tumor-transforming 1 [Source:HGNC Symbol;Acc:9690]                                                    |
| 1465 | ENSG00000100368 | 10499.97572 | 0.505936093  | 0.050282263 | 1.04E-22 | CSF2RB    | colony stimulating factor 2 receptor, beta, low-affinity (granulocyte-macrophage) [Source:HGNC Symbol;Acc:2436] |
| 1466 | ENSG00000196850 | 2138.074849 | 0.873556489  | 0.086864088 | 1.10E-22 | PPTC7     | PTC7 protein phosphatase homolog ( <i>S. cerevisiae</i> ) [Source:HGNC Symbol;Acc:30695]                        |
| 1467 | ENSG00000111716 | 3307.063261 | 0.716210661  | 0.071267407 | 1.18E-22 | LDHB      | lactate dehydrogenase B [Source:HGNC Symbol;Acc:6541]                                                           |
| 1468 | ENSG00000140455 | 3871.22959  | -0.715706801 | 0.071220068 | 1.18E-22 | USP3      | ubiquitin specific peptidase 3 [Source:HGNC Symbol;Acc:12626]                                                   |
| 1469 | ENSG00000182568 | 2380.313123 | 0.807820943  | 0.080408183 | 1.21E-22 | SATB1     | SATB homeobox 1 [Source:HGNC Symbol;Acc:10541]                                                                  |
| 1470 | ENSG00000161542 | 1116.69504  | -1.017226085 | 0.101256175 | 1.22E-22 | PRPSAP1   | phosphoribosyl pyrophosphate synthetase-associated protein 1 [Source:HGNC Symbol;Acc:9466]                      |
| 1471 | ENSG00000159023 | 6180.934876 | 0.613734168  | 0.061096508 | 1.23E-22 | EPB41     | erythrocyte membrane protein band 4.1 (elliptocytosis 1, RH-linked) [Source:HGNC Symbol;Acc:3377]               |
| 1472 | ENSG00000173762 | 330.8948294 | 2.485116735  | 0.247435883 | 1.25E-22 | CD7       | CD7 molecule [Source:HGNC Symbol;Acc:1695]                                                                      |
| 1473 | ENSG00000165490 | 406.6961244 | -1.760382276 | 0.175300902 | 1.27E-22 | C11orf82  | chromosome 11 open reading frame 82 [Source:HGNC Symbol;Acc:26351]                                              |
| 1474 | ENSG00000156675 | 7951.185753 | 0.537145771  | 0.053508913 | 1.31E-22 | RAB11FIP1 | RAB11 family interacting protein 1 (class I) [Source:HGNC Symbol;Acc:30265]                                     |
| 1475 | ENSG00000186469 | 5562.736504 | -0.588456087 | 0.058628796 | 1.33E-22 | GNG2      | guanine nucleotide binding protein (G protein), gamma 2 [Source:HGNC Symbol;Acc:4404]                           |
| 1476 | ENSG00000261577 | 231.087137  | 2.249999678  | 0.224215994 | 1.36E-22 | JUP       | junction plakoglobin [Source:HGNC Symbol;Acc:6207]                                                              |
| 1477 | ENSG00000029534 | 465.5670666 | -1.832236746 | 0.182609693 | 1.37E-22 | ANK1      | ankyrin 1, erythrocytic [Source:HGNC Symbol;Acc:492]                                                            |
| 1478 | ENSG00000115165 | 2572.629022 | 0.783951449  | 0.078162709 | 1.43E-22 | CYTIP     | cytohesin 1 interacting protein [Source:HGNC Symbol;Acc:9506]                                                   |

|      |                 |             |              |             |          |         |                                                                                                                  |
|------|-----------------|-------------|--------------|-------------|----------|---------|------------------------------------------------------------------------------------------------------------------|
| 1479 | ENSG00000272598 | 259.8586283 | -1.991234862 | 0.198719678 | 1.57E-22 | VSTM1   | V-set and transmembrane domain containing 1 [Source:HGNC Symbol;Acc:29455]                                       |
| 1480 | ENSG00000273349 | 259.8589725 | -1.991239095 | 0.198720856 | 1.57E-22 | VSTM1   | V-set and transmembrane domain containing 1 [Source:HGNC Symbol;Acc:29455]                                       |
| 1481 | ENSG00000273414 | 259.8552305 | -1.991157705 | 0.198718545 | 1.57E-22 | VSTM1   | V-set and transmembrane domain containing 1 [Source:HGNC Symbol;Acc:29455]                                       |
| 1482 | ENSG00000273242 | 259.8488868 | -1.991059488 | 0.198711318 | 1.57E-22 | VSTM1   | V-set and transmembrane domain containing 1 [Source:HGNC Symbol;Acc:29455]                                       |
| 1483 | ENSG00000272898 | 259.8512039 | -1.99109227  | 0.198715748 | 1.57E-22 | VSTM1   | V-set and transmembrane domain containing 1 [Source:HGNC Symbol;Acc:29455]                                       |
| 1484 | ENSG00000272649 | 259.8493762 | -1.99106811  | 0.198715503 | 1.57E-22 | VSTM1   | V-set and transmembrane domain containing 1 [Source:HGNC Symbol;Acc:29455]                                       |
| 1485 | ENSG00000273460 | 259.8520816 | -1.991090693 | 0.19871874  | 1.57E-22 | VSTM1   | V-set and transmembrane domain containing 1 [Source:HGNC Symbol;Acc:29455]                                       |
| 1486 | ENSG00000162688 | 1045.832488 | -1.107723353 | 0.110584444 | 1.62E-22 | AGL     | amylo-alpha-1, 6-glucosidase, 4-alpha-glucanotransferase [Source:HGNC Symbol;Acc:321]                            |
| 1487 | ENSG00000102265 | 1958.05237  | 0.838290621  | 0.083733507 | 1.71E-22 | TIMP1   | TIMP metalloproteinase inhibitor 1 [Source:HGNC Symbol;Acc:11820]                                                |
| 1488 | ENSG00000272759 | 259.6782506 | -1.989679051 | 0.198757027 | 1.72E-22 | VSTM1   | V-set and transmembrane domain containing 1 [Source:HGNC Symbol;Acc:29455]                                       |
| 1489 | ENSG00000273421 | 259.6768603 | -1.989631949 | 0.198758229 | 1.73E-22 | VSTM1   | V-set and transmembrane domain containing 1 [Source:HGNC Symbol;Acc:29455]                                       |
| 1490 | ENSG00000189068 | 259.6773699 | -1.989648393 | 0.19876183  | 1.73E-22 | VSTM1   | V-set and transmembrane domain containing 1 [Source:HGNC Symbol;Acc:29455]                                       |
| 1491 | ENSG00000185920 | 344.4506552 | 2.02170513   | 0.202183867 | 1.93E-22 | PTCH1   | patched 1 [Source:HGNC Symbol;Acc:9585]                                                                          |
| 1492 | ENSG00000197818 | 2309.680378 | -0.829627258 | 0.083048276 | 2.12E-22 | SLC9A8  | solute carrier family 9, subfamily A (NHE8, cation proton antiporter 8), member 8 [Source:HGNC Symbol;Acc:20728] |
| 1493 | ENSG00000133056 | 532.0499386 | 1.441519142  | 0.14432106  | 2.15E-22 | PIK3C2B | phosphatidylinositol-4-phosphate 3-kinase, catalytic subunit type 2 beta [Source:HGNC Symbol;Acc:8972]           |
| 1494 | ENSG00000256515 | 281.4598823 | 2.13417182   | 0.213878489 | 2.37E-22 | CCL3L3  | chemokine (C-C motif) ligand 3-like 3 [Source:HGNC Symbol;Acc:30554]                                             |
| 1495 | ENSG00000166974 | 1215.276316 | 0.995350138  | 0.099761058 | 2.40E-22 | MAPRE2  | microtubule-associated protein, RP/EB family, member 2 [Source:HGNC Symbol;Acc:6891]                             |
| 1496 | ENSG00000166947 | 665.664591  | -1.260602024 | 0.126353128 | 2.41E-22 | EPB42   | erythrocyte membrane protein band 4.2 [Source:HGNC Symbol;Acc:3381]                                              |
| 1497 | ENSG00000175309 | 4063.785356 | -0.652481421 | 0.065406461 | 2.43E-22 | PHYKPL  | 5-phosphohydroxy-L-lysine phospho-lyase [Source:HGNC Symbol;Acc:28249]                                           |
| 1498 | ENSG00000100307 | 2168.787776 | 0.887403002  | 0.089013095 | 2.59E-22 | CBX7    | chromobox homolog 7 [Source:HGNC Symbol;Acc:1557]                                                                |
| 1499 | ENSG00000165449 | 56.30509217 | -4.688066704 | 0.47030615  | 2.62E-22 | SLC16A9 | solute carrier family 16, member 9 [Source:HGNC Symbol;Acc:23520]                                                |
| 1500 | ENSG00000242616 | 1435.433472 | 0.931705142  | 0.09353265  | 2.81E-22 | GNG10   | guanine nucleotide binding protein (G protein), gamma 10 [Source:HGNC Symbol;Acc:4402]                           |
| 1501 | ENSG00000179889 | 1594.03446  | -0.898764847 | 0.090276317 | 2.97E-22 | PDXDC1  | pyridoxal-dependent decarboxylase domain containing 1 [Source:HGNC Symbol;Acc:28995]                             |
| 1502 | ENSG00000244682 | 1042.611686 | 1.223561729  | 0.122918634 | 3.01E-22 | FCGR2C  | Fc fragment of IgG, low affinity IIc, receptor for (CD32) (gene/pseudogene) [Source:HGNC Symbol;Acc:15626]       |
| 1503 | ENSG00000107317 | 177.4987041 | 2.974057467  | 0.298967309 | 3.21E-22 | PTGDS   | prostaglandin D2 synthase 21kDa (brain) [Source:HGNC Symbol;Acc:9592]                                            |
| 1504 | ENSG00000185883 | 2204.292271 | -0.853213978 | 0.085769448 | 3.21E-22 | ATP6V0C | ATPase, H+ transporting, lysosomal 16kDa, V0 subunit c [Source:HGNC Symbol;Acc:855]                              |
| 1505 | ENSG00000122741 | 1520.076188 | -1.01929204  | 0.102517001 | 3.38E-22 | DCAF10  | DDB1 and CUL4 associated factor 10 [Source:HGNC Symbol;Acc:23686]                                                |
| 1506 | ENSG00000117280 | 941.8015478 | 1.116852501  | 0.112341888 | 3.41E-22 | RAB7L1  | RAB7, member RAS oncogene family-like 1 [Source:HGNC Symbol;Acc:9789]                                            |

|      |                 |             |              |             |          |          |                                                                                         |
|------|-----------------|-------------|--------------|-------------|----------|----------|-----------------------------------------------------------------------------------------|
| 1507 | ENSG00000123444 | 373.1728828 | 2.024959774  | 0.203744708 | 3.51E-22 | KBTBD4   | kelch repeat and BTB (POZ) domain containing 4 [Source:HGNC Symbol;Acc:23761]           |
| 1508 | ENSG00000171777 | 6761.878194 | -0.553995732 | 0.055750195 | 3.56E-22 | RASGRP4  | RAS guanyl releasing protein 4 [Source:HGNC Symbol;Acc:18958]                           |
| 1509 | ENSG00000213860 | 3212.322566 | 0.857800014  | 0.086356024 | 3.70E-22 | RPL21P75 | ribosomal protein L21 pseudogene 75 [Source:HGNC Symbol;Acc:36460]                      |
| 1510 | ENSG00000100027 | 710.9438121 | 1.275454397  | 0.128515126 | 4.04E-22 | YPPE1    | yippee-like 1 (Drosophila) [Source:HGNC Symbol;Acc:12845]                               |
| 1511 | ENSG00000129625 | 2706.264382 | -0.699964921 | 0.070581886 | 4.35E-22 | REEP5    | receptor accessory protein 5 [Source:HGNC Symbol;Acc:30077]                             |
| 1512 | ENSG00000184182 | 1154.708788 | -1.108460105 | 0.111810326 | 4.49E-22 | UBE2F    | ubiquitin-conjugating enzyme E2F (putative) [Source:HGNC Symbol;Acc:12480]              |
| 1513 | ENSG00000231184 | 49.72455962 | -4.895584538 | 0.494115403 | 4.76E-22 | FAM58DP  | family with sequence similarity 58, member D, pseudogene [Source:HGNC Symbol;Acc:42022] |
| 1514 | ENSG00000140450 | 578.4596596 | 1.647131538  | 0.166247473 | 4.76E-22 | ARRDC4   | arrestin domain containing 4 [Source:HGNC Symbol;Acc:28087]                             |
| 1515 | ENSG00000151725 | 376.3095363 | -1.64908804  | 0.166592862 | 5.20E-22 | CENPU    | centromere protein U [Source:HGNC Symbol;Acc:21348]                                     |
| 1516 | ENSG00000132646 | 1398.090454 | -0.900077303 | 0.090941556 | 5.28E-22 | PCNA     | proliferating cell nuclear antigen [Source:HGNC Symbol;Acc:8729]                        |
| 1517 | ENSG0000030419  | 552.9673007 | 1.542730208  | 0.155920382 | 5.43E-22 | IKZF2    | IKAROS family zinc finger 2 (Helios) [Source:HGNC Symbol;Acc:13177]                     |
| 1518 | ENSG00000149564 | 132.2086035 | 2.961167597  | 0.299430489 | 5.71E-22 | ESAM     | endothelial cell adhesion molecule [Source:HGNC Symbol;Acc:17474]                       |
| 1519 | ENSG00000104447 | 433.4738657 | -1.677416253 | 0.169635187 | 5.76E-22 | TRPS1    | trichorhinophalangeal syndrome I [Source:HGNC Symbol;Acc:12340]                         |
| 1520 | ENSG00000090863 | 2321.628044 | 0.808358777  | 0.081778647 | 5.97E-22 | GLG1     | golgi glycoprotein 1 [Source:HGNC Symbol;Acc:4316]                                      |
| 1521 | ENSG00000261883 | 210.4761754 | -2.135778392 | 0.216353427 | 6.79E-22 | HMBS     | hydroxymethylbilane synthase [Source:HGNC Symbol;Acc:4982]                              |
| 1522 | ENSG00000129353 | 11807.36182 | 0.528981996  | 0.053593804 | 6.89E-22 | SLC44A2  | solute carrier family 44 (choline transporter), member 2 [Source:HGNC Symbol;Acc:17292] |
| 1523 | ENSG00000143653 | 580.0347596 | -1.366356408 | 0.138444696 | 6.95E-22 | SCCPDH   | saccharopine dehydrogenase (putative) [Source:HGNC Symbol;Acc:24275]                    |
| 1524 | ENSG00000256269 | 210.8199728 | -2.132374904 | 0.216114997 | 7.12E-22 | HMBS     | hydroxymethylbilane synthase [Source:HGNC Symbol;Acc:4982]                              |
| 1525 | ENSG00000198837 | 5852.326316 | -0.592189059 | 0.060040669 | 7.38E-22 | DENND4B  | DENN/MADD domain containing 4B [Source:HGNC Symbol;Acc:29044]                           |
| 1526 | ENSG00000196839 | 315.2445276 | 1.809553579  | 0.183952041 | 9.56E-22 | ADA      | adenosine deaminase [Source:HGNC Symbol;Acc:186]                                        |
| 1527 | ENSG00000135821 | 15516.02541 | 0.458564367  | 0.046635407 | 9.95E-22 | GLUL     | glutamate-ammonia ligase [Source:HGNC Symbol;Acc:4341]                                  |
| 1528 | ENSG00000134186 | 3369.12741  | 0.723544731  | 0.073658279 | 1.10E-21 | PRPF38B  | pre-mRNA processing factor 38B [Source:HGNC Symbol;Acc:25512]                           |
| 1529 | ENSG00000125089 | 329.5175706 | 2.394590513  | 0.243781821 | 1.10E-21 | SH3TC1   | SH3 domain and tetratricopeptide repeats 1 [Source:HGNC Symbol;Acc:26009]               |
| 1530 | ENSG00000271303 | 1515.777804 | 0.947066033  | 0.09641967  | 1.10E-21 | SRXN1    | sulfiredoxin 1 [Source:HGNC Symbol;Acc:16132]                                           |
| 1531 | ENSG00000273170 | 381.7335726 | -1.709285925 | 0.174041159 | 1.12E-21 | ANKRD18A | Ankyrin repeat domain-containing protein 18A [Source:UniProtKB/TrEMBL;Acc:H3BPPE5]      |
| 1532 | ENSG00000162366 | 95.94316825 | 3.504933272  | 0.357010353 | 1.16E-21 | PDZK1IP1 | PDZK1 interacting protein 1 [Source:HGNC Symbol;Acc:16887]                              |
| 1533 | ENSG00000189190 | 541.0337795 | 1.546487115  | 0.157532066 | 1.16E-21 | ZNF600   | zinc finger protein 600 [Source:HGNC Symbol;Acc:30951]                                  |
| 1534 | ENSG00000227507 | 889.5248368 | 1.26181538   | 0.128661984 | 1.28E-21 | LTB      | lymphotoxin beta (TNF superfamily, member 3) [Source:HGNC Symbol;Acc:6711]              |

|      |                 |             |              |             |          |          |                                                                                                                  |
|------|-----------------|-------------|--------------|-------------|----------|----------|------------------------------------------------------------------------------------------------------------------|
| 1535 | ENSG00000051382 | 1218.774626 | -1.005394803 | 0.102552815 | 1.32E-21 | PIK3CB   | phosphatidylinositol-4,5-bisphosphate 3-kinase, catalytic subunit beta [Source:HGNC Symbol;Acc:8976]             |
| 1536 | ENSG00000128322 | 256.3355421 | 2.11959618   | 0.216343878 | 1.41E-21 | IGLL1    | immunoglobulin lambda-like polypeptide 1 [Source:HGNC Symbol;Acc:5870]                                           |
| 1537 | ENSG00000123636 | 4451.362802 | -0.663584588 | 0.06775706  | 1.46E-21 | BAZ2B    | bromodomain adjacent to zinc finger domain, 2B [Source:HGNC Symbol;Acc:963]                                      |
| 1538 | ENSG00000161016 | 9403.820938 | 0.550015428  | 0.056176182 | 1.50E-21 | RPL8     | ribosomal protein L8 [Source:HGNC Symbol;Acc:10368]                                                              |
| 1539 | ENSG00000105983 | 866.7848154 | -1.142127377 | 0.116676485 | 1.53E-21 | LMBR1    | limb development membrane protein 1 [Source:HGNC Symbol;Acc:13243]                                               |
| 1540 | ENSG00000139278 | 6879.241752 | 0.649452714  | 0.066353712 | 1.54E-21 | GLIPR1   | GLI pathogenesis-related 1 [Source:HGNC Symbol;Acc:17001]                                                        |
| 1541 | ENSG00000152778 | 340.3039565 | 1.849090005  | 0.188943211 | 1.56E-21 | IFIT5    | interferon-induced protein with tetratricopeptide repeats 5 [Source:HGNC Symbol;Acc:13328]                       |
| 1542 | ENSG00000141540 | 255.8726859 | 2.340194623  | 0.239267998 | 1.65E-21 | TTYH2    | tweet family member 2 [Source:HGNC Symbol;Acc:13877]                                                             |
| 1543 | ENSG00000142208 | 3692.820711 | 0.941010913  | 0.096348949 | 1.90E-21 | AKT1     | v-akt murine thymoma viral oncogene homolog 1 [Source:HGNC Symbol;Acc:391]                                       |
| 1544 | ENSG00000160791 | 289.9346719 | 2.14191208   | 0.219520096 | 2.08E-21 | CCR5     | chemokine (C-C motif) receptor 5 (gene/pseudogene) [Source:HGNC Symbol;Acc:1606]                                 |
| 1545 | ENSG00000067900 | 4985.41201  | -0.733754683 | 0.075203893 | 2.09E-21 | ROCK1    | Rho-associated, coiled-coil containing protein kinase 1 [Source:HGNC Symbol;Acc:10251]                           |
| 1546 | ENSG00000118418 | 541.15558   | 1.525018547  | 0.156307874 | 2.09E-21 | HMGN3    | high mobility group nucleosomal binding domain 3 [Source:HGNC Symbol;Acc:12312]                                  |
| 1547 | ENSG00000118193 | 237.0048458 | -2.19833809  | 0.225327856 | 2.10E-21 | KIF14    | kinesin family member 14 [Source:HGNC Symbol;Acc:19181]                                                          |
| 1548 | ENSG00000143776 | 108.6716181 | -3.047674121 | 0.312431574 | 2.13E-21 | CDC42BPA | CDC42 binding protein kinase alpha (DMPK-like) [Source:HGNC Symbol;Acc:1737]                                     |
| 1549 | ENSG00000140995 | 6498.554712 | -0.68668031  | 0.070454991 | 2.31E-21 | DEF8     | differentially expressed in FDCP 8 homolog (mouse) [Source:HGNC Symbol;Acc:25969]                                |
| 1550 | ENSG00000090020 | 1520.678855 | -0.908283234 | 0.093221253 | 2.38E-21 | SLC9A1   | solute carrier family 9, subfamily A (NHE1, cation proton antiporter 1), member 1 [Source:HGNC Symbol;Acc:11071] |
| 1551 | ENSG00000172985 | 288.824009  | -1.824081234 | 0.187350813 | 2.55E-21 | SH3RF3   | SH3 domain containing ring finger 3 [Source:HGNC Symbol;Acc:24699]                                               |
| 1552 | ENSG00000111276 | 2639.237619 | 0.761180484  | 0.078185145 | 2.56E-21 | CDKN1B   | cyclin-dependent kinase inhibitor 1B (p27, Kip1) [Source:HGNC Symbol;Acc:1785]                                   |
| 1553 | ENSG00000168283 | 928.0524898 | 1.225088012  | 0.125837542 | 2.56E-21 | BMI1     | BMI1 polycomb ring finger oncogene [Source:HGNC Symbol;Acc:1066]                                                 |
| 1554 | ENSG00000099864 | 112.1073636 | 3.136581954  | 0.32246375  | 2.79E-21 | PALM     | paralemmin [Source:HGNC Symbol;Acc:8594]                                                                         |
| 1555 | ENSG00000113273 | 620.1926663 | -1.320995846 | 0.135869759 | 2.91E-21 | ARSB     | arylsulfatase B [Source:HGNC Symbol;Acc:714]                                                                     |
| 1556 | ENSG00000107771 | 1039.021084 | 1.205710334  | 0.124031613 | 2.95E-21 | CCSER2   | coiled-coil serine-rich protein 2 [Source:HGNC Symbol;Acc:29197]                                                 |
| 1557 | ENSG00000089220 | 1244.001599 | 1.006058834  | 0.103577471 | 3.19E-21 | PEBP1    | phosphatidylethanolamine binding protein 1 [Source:HGNC Symbol;Acc:8630]                                         |
| 1558 | ENSG00000085662 | 444.8256078 | 1.601765477  | 0.164917258 | 3.20E-21 | AKR1B1   | aldo-keto reductase family 1, member B1 (aldose reductase) [Source:HGNC Symbol;Acc:381]                          |
| 1559 | ENSG00000067167 | 2098.848518 | 0.764877349  | 0.078793394 | 3.37E-21 | TRAM1    | translocation associated membrane protein 1 [Source:HGNC Symbol;Acc:20568]                                       |
| 1560 | ENSG00000172890 | 5078.002976 | -0.590680354 | 0.060850917 | 3.38E-21 | NADSYN1  | NAD synthetase 1 [Source:HGNC Symbol;Acc:29832]                                                                  |
| 1561 | ENSG00000177409 | 3380.221508 | 0.690229756  | 0.071136482 | 3.51E-21 | SAMD9L   | sterile alpha motif domain containing 9-like [Source:HGNC Symbol;Acc:1349]                                       |
| 1562 | ENSG00000124107 | 1771.89233  | -0.877136419 | 0.090436599 | 3.65E-21 | SLPI     | secretory leukocyte peptidase inhibitor [Source:HGNC Symbol;Acc:11092]                                           |

|      |                 |             |              |             |          |               |                                                                                                                 |
|------|-----------------|-------------|--------------|-------------|----------|---------------|-----------------------------------------------------------------------------------------------------------------|
| 1563 | ENSG00000013573 | 569.9352382 | -1.314033324 | 0.135491782 | 3.67E-21 | DDX11         | DEAD/H (Asp-Glu-Ala-Asp/His) box helicase 11 [Source:HGNC Symbol;Acc:2736]                                      |
| 1564 | ENSG00000130150 | 1971.552523 | -0.916578893 | 0.094535688 | 3.77E-21 | MOSPD2        | motile sperm domain containing 2 [Source:HGNC Symbol;Acc:28381]                                                 |
| 1565 | ENSG00000067840 | 181.666989  | 2.753096106  | 0.283987975 | 3.81E-21 | PDZD4         | PDZ domain containing 4 [Source:HGNC Symbol;Acc:21167]                                                          |
| 1566 | ENSG00000162881 | 657.7667809 | -1.536061764 | 0.15847223  | 3.86E-21 | OXER1         | oxoeicosanoid (OXE) receptor 1 [Source:HGNC Symbol;Acc:24884]                                                   |
| 1567 | ENSG00000189319 | 1608.839308 | 1.047250236  | 0.108167091 | 4.30E-21 | FAM53B        | family with sequence similarity 53, member B [Source:HGNC Symbol;Acc:28968]                                     |
| 1568 | ENSG00000140090 | 510.4229996 | -1.450887971 | 0.149878234 | 4.36E-21 | SLC24A4       | solute carrier family 24 (sodium/potassium/calcium exchanger), member 4 [Source:HGNC Symbol;Acc:10978]          |
| 1569 | ENSG00000267915 | 181.3203123 | 2.77427698   | 0.286757828 | 4.61E-21 | PDZD4         | PDZ domain containing 4 [Source:HGNC Symbol;Acc:21167]                                                          |
| 1570 | ENSG00000075151 | 2330.297283 | -0.798060552 | 0.082514971 | 4.74E-21 | EIF4G3        | eukaryotic translation initiation factor 4 gamma, 3 [Source:HGNC Symbol;Acc:3298]                               |
| 1571 | ENSG00000265298 | 1230.299518 | -0.925710869 | 0.095731684 | 4.82E-21 | RP13-104F24.3 |                                                                                                                 |
| 1572 | ENSG00000138376 | 397.2877368 | -2.276962035 | 0.235500185 | 4.88E-21 | BARD1         | BRCA1 associated RING domain 1 [Source:HGNC Symbol;Acc:952]                                                     |
| 1573 | ENSG00000107338 | 148.8180452 | -2.583963747 | 0.267295308 | 4.95E-21 | SHB           | Src homology 2 domain containing adaptor protein B [Source:HGNC Symbol;Acc:10838]                               |
| 1574 | ENSG00000181754 | 192.048749  | 2.554793639  | 0.264461878 | 5.28E-21 | AMIGO1        | adhesion molecule with Ig-like domain 1 [Source:HGNC Symbol;Acc:20824]                                          |
| 1575 | ENSG00000205302 | 1683.139343 | 0.83230823   | 0.086185891 | 5.45E-21 | SNX2          | sorting nexin 2 [Source:HGNC Symbol;Acc:11173]                                                                  |
| 1576 | ENSG00000168297 | 1812.361134 | -0.860784875 | 0.089141702 | 5.49E-21 | PXK           | PX domain containing serine/threonine kinase [Source:HGNC Symbol;Acc:23326]                                     |
| 1577 | ENSG00000184445 | 1157.246423 | -0.96533302  | 0.100007422 | 5.69E-21 | KNTC1         | kinetochore associated 1 [Source:HGNC Symbol;Acc:17255]                                                         |
| 1578 | ENSG00000215764 | 137.0620716 | 3.032999493  | 0.314262314 | 5.76E-21 | KIR2DL2       | killer cell immunoglobulin-like receptor, two domains, long cytoplasmic tail, 2 [Source:HGNC Symbol;Acc:6330]   |
| 1579 | ENSG00000243753 | 103.6715271 | 3.791048325  | 0.392844328 | 5.81E-21 | HLA-L         | major histocompatibility complex, class I, L (pseudogene) [Source:HGNC Symbol;Acc:4970]                         |
| 1580 | ENSG00000134690 | 252.8238688 | -1.932880992 | 0.200336392 | 5.93E-21 | CDC48         | cell division cycle associated 8 [Source:HGNC Symbol;Acc:14629]                                                 |
| 1581 | ENSG00000168056 | 546.1779679 | 1.421999726  | 0.147424201 | 6.07E-21 | LTPB3         | latent transforming growth factor beta binding protein 3 [Source:HGNC Symbol;Acc:6716]                          |
| 1582 | ENSG00000071242 | 508.1470599 | -1.44806253  | 0.150137898 | 6.11E-21 | RPS6KA2       | ribosomal protein S6 kinase, 90kDa, polypeptide 2 [Source:HGNC Symbol;Acc:10431]                                |
| 1583 | ENSG00000062485 | 3678.413402 | -0.654611006 | 0.067893958 | 6.30E-21 | CS            | citrate synthase [Source:HGNC Symbol;Acc:2422]                                                                  |
| 1584 | ENSG00000025796 | 2222.695413 | -0.766326269 | 0.079511357 | 6.53E-21 | SEC63         | SEC63 homolog (S. cerevisiae) [Source:HGNC Symbol;Acc:21082]                                                    |
| 1585 | ENSG00000249072 | 944.9973544 | -1.244111423 | 0.12920203  | 7.11E-21 | RP11-777B9.5  |                                                                                                                 |
| 1586 | ENSG00000162777 | 2186.393936 | 0.781143615  | 0.081139802 | 7.25E-21 | DENND2D       | DENN/MADD domain containing 2D [Source:HGNC Symbol;Acc:26192]                                                   |
| 1587 | ENSG00000180773 | 691.7183765 | -1.22057697  | 0.126845461 | 7.57E-21 | SLC36A4       | solute carrier family 36 (proton/amino acid symporter), member 4 [Source:HGNC Symbol;Acc:19660]                 |
| 1588 | ENSG00000164442 | 2618.13721  | -0.679464893 | 0.070677701 | 8.26E-21 | CITED2        | Cbp/p300-interacting transactivator, with Glu/Asp-rich carboxy-terminal domain, 2 [Source:HGNC Symbol;Acc:1987] |
| 1589 | ENSG00000103196 | 4307.496118 | -0.622945835 | 0.064857669 | 8.99E-21 | CRISPLD2      | cysteine-rich secretory protein LCCL domain containing 2 [Source:HGNC Symbol;Acc:25248]                         |
| 1590 | ENSG00000112742 | 185.5605018 | -2.324059875 | 0.241997202 | 9.08E-21 | TTK           | TTK protein kinase [Source:HGNC Symbol;Acc:12401]                                                               |

|      |                 |             |              |             |          |          |                                                                                                                                   |
|------|-----------------|-------------|--------------|-------------|----------|----------|-----------------------------------------------------------------------------------------------------------------------------------|
| 1591 | ENSG00000007062 | 156.3851134 | 2.66492754   | 0.277540417 | 9.23E-21 | PROM1    | prominin 1 [Source:HGNC Symbol;Acc:9454]                                                                                          |
| 1592 | ENSG00000134489 | 227.2880177 | -2.032255448 | 0.211686965 | 9.37E-21 | HRH4     | histamine receptor H4 [Source:HGNC Symbol;Acc:17383]                                                                              |
| 1593 | ENSG00000213625 | 2152.28496  | -0.757266871 | 0.078892864 | 9.51E-21 | LEPROT   | leptin receptor overlapping transcript [Source:HGNC Symbol;Acc:29477]                                                             |
| 1594 | ENSG00000078269 | 1342.430325 | -0.991437167 | 0.103291974 | 9.53E-21 | SYNJ2    | synaptojanin 2 [Source:HGNC Symbol;Acc:11504]                                                                                     |
| 1595 | ENSG00000141447 | 604.6313099 | -1.353174194 | 0.141042915 | 9.94E-21 | OSBPL1A  | oxysterol binding protein-like 1A [Source:HGNC Symbol;Acc:16398]                                                                  |
| 1596 | ENSG00000129675 | 4304.829623 | -0.624644687 | 0.065130846 | 1.03E-20 | ARHGEF6  | Rac/Cdc42 guanine nucleotide exchange factor (GEF) 6 [Source:HGNC Symbol;Acc:685]                                                 |
| 1597 | ENSG00000182782 | 653.968167  | 1.408372557  | 0.146928954 | 1.08E-20 | HCAR2    | hydroxycarboxylic acid receptor 2 [Source:HGNC Symbol;Acc:24827]                                                                  |
| 1598 | ENSG00000198355 | 604.2879962 | 1.416664722  | 0.147806617 | 1.09E-20 | PIM3     | pim-3 oncogene [Source:HGNC Symbol;Acc:19310]                                                                                     |
| 1599 | ENSG00000117868 | 2096.684127 | 0.803450585  | 0.083836246 | 1.10E-20 | ESYT2    | extended synaptotagmin-like protein 2 [Source:HGNC Symbol;Acc:22211]                                                              |
| 1600 | ENSG00000137207 | 2477.108468 | 0.769605285  | 0.08036464  | 1.18E-20 | YIPF3    | Yip1 domain family, member 3 [Source:HGNC Symbol;Acc:21023]                                                                       |
| 1601 | ENSG00000065328 | 174.0483665 | -2.643641989 | 0.276161748 | 1.22E-20 | MCM10    | minichromosome maintenance complex component 10 [Source:HGNC Symbol;Acc:18043]                                                    |
| 1602 | ENSG00000126088 | 1007.69507  | -0.986169596 | 0.103106059 | 1.32E-20 | UROD     | uroporphyrinogen decarboxylase [Source:HGNC Symbol;Acc:12591]                                                                     |
| 1603 | ENSG00000270231 | 694.5821024 | 1.323617109  | 0.138538002 | 1.45E-20 | NBPF10   | Homo sapiens neuroblastoma breakpoint family, member 8 (NBPF8), transcript variant 1, mRNA. [Source:RefSeq mRNA;Acc:NM_001037501] |
| 1604 | ENSG00000111602 | 737.2045033 | -1.264811716 | 0.132402683 | 1.47E-20 | TIMELESS | timeless circadian clock [Source:HGNC Symbol;Acc:11813]                                                                           |
| 1605 | ENSG00000078589 | 211.8818797 | 2.389620277  | 0.250260886 | 1.53E-20 | P2RY10   | purinergic receptor P2Y, G-protein coupled, 10 [Source:HGNC Symbol;Acc:19906]                                                     |
| 1606 | ENSG00000168754 | 80.86758892 | -3.599044911 | 0.376937858 | 1.54E-20 | FAM178B  | family with sequence similarity 178, member B [Source:HGNC Symbol;Acc:28036]                                                      |
| 1607 | ENSG00000172232 | 3673.531022 | -2.318827218 | 0.243106455 | 1.69E-20 | AZU1     | azurocidin 1 [Source:HGNC Symbol;Acc:913]                                                                                         |
| 1608 | ENSG00000072858 | 426.6260577 | 1.671421225  | 0.175262975 | 1.72E-20 | SID1     | SID1 transmembrane family, member 1 [Source:HGNC Symbol;Acc:25967]                                                                |
| 1609 | ENSG00000156273 | 3127.132199 | 0.981547135  | 0.102955252 | 1.76E-20 | BACH1    | BTB and CNC homology 1, basic leucine zipper transcription factor 1 [Source:HGNC Symbol;Acc:935]                                  |
| 1610 | ENSG00000181191 | 176.6322212 | 2.415787051  | 0.253442152 | 1.79E-20 | PJA1     | praja ring finger 1, E3 ubiquitin protein ligase [Source:HGNC Symbol;Acc:16648]                                                   |
| 1611 | ENSG00000170759 | 3428.36633  | -0.649742111 | 0.068201498 | 1.88E-20 | KIF5B    | kinesin family member 5B [Source:HGNC Symbol;Acc:6324]                                                                            |
| 1612 | ENSG00000105810 | 1857.561006 | 0.899754988  | 0.094474012 | 1.94E-20 | CDK6     | cyclin-dependent kinase 6 [Source:HGNC Symbol;Acc:1777]                                                                           |
| 1613 | ENSG00000175137 | 2127.827481 | -0.756555895 | 0.079465818 | 2.00E-20 | SH3BP5L  | SH3-binding domain protein 5-like [Source:HGNC Symbol;Acc:29360]                                                                  |
| 1614 | ENSG00000163527 | 4253.742902 | 0.706467728  | 0.074207452 | 2.00E-20 | STT3B    | STT3B, subunit of the oligosaccharyltransferase complex (catalytic) [Source:HGNC Symbol;Acc:30611]                                |
| 1615 | ENSG00000102935 | 52.31852892 | 4.7583801    | 0.499845607 | 2.01E-20 | ZNF423   | zinc finger protein 423 [Source:HGNC Symbol;Acc:16762]                                                                            |
| 1616 | ENSG00000215328 | 2382.529316 | -1.000796226 | 0.105146587 | 2.04E-20 | HSPA1A   | heat shock 70kDa protein 1A [Source:HGNC Symbol;Acc:5232]                                                                         |
| 1617 | ENSG00000206292 | 154.640015  | 2.839052228  | 0.298361801 | 2.09E-20 | HLA-DOA  | major histocompatibility complex, class II, DO alpha [Source:HGNC Symbol;Acc:4936]                                                |
| 1618 | ENSG00000198399 | 5164.16142  | -0.573105632 | 0.060235774 | 2.11E-20 | ITSN2    | intersectin 2 [Source:HGNC Symbol;Acc:6184]                                                                                       |



|      |                 |             |              |             |          |          |                                                                                                                 |
|------|-----------------|-------------|--------------|-------------|----------|----------|-----------------------------------------------------------------------------------------------------------------|
| 1619 | ENSG00000131873 | 1676.339191 | -1.076424515 | 0.113162408 | 2.16E-20 | CHSY1    | chondroitin sulfate synthase 1 [Source:HGNC Symbol;Acc:17198]                                                   |
| 1620 | ENSG00000130813 | 1259.444112 | 0.983129484  | 0.103404898 | 2.25E-20 | C19orf66 | chromosome 19 open reading frame 66 [Source:HGNC Symbol;Acc:25649]                                              |
| 1621 | ENSG00000010017 | 1513.914238 | -0.840590218 | 0.088427353 | 2.29E-20 | RANBP9   | RAN binding protein 9 [Source:HGNC Symbol;Acc:13727]                                                            |
| 1622 | ENSG00000100427 | 830.3346162 | -1.246502121 | 0.131161652 | 2.34E-20 | MLC1     | megalencephalic leukoencephalopathy with subcortical cysts 1 [Source:HGNC Symbol;Acc:17082]                     |
| 1623 | ENSG00000139292 | 48.87340162 | 4.895806136  | 0.515398791 | 2.44E-20 | LGR5     | leucine-rich repeat containing G protein-coupled receptor 5 [Source:HGNC Symbol;Acc:4504]                       |
| 1624 | ENSG00000112245 | 2294.322346 | -1.000975725 | 0.105388771 | 2.47E-20 | PTP4A1   | protein tyrosine phosphatase type IVA, member 1 [Source:HGNC Symbol;Acc:9634]                                   |
| 1625 | ENSG00000262383 | 326.9194598 | -1.690643208 | 0.17806335  | 2.54E-20 | LILRA3   | leukocyte immunoglobulin-like receptor, subfamily A (without TM domain), member 3 [Source:HGNC Symbol;Acc:6604] |
| 1626 | ENSG00000261935 | 326.9192372 | -1.690638257 | 0.178063883 | 2.54E-20 | LILRA3   | leukocyte immunoglobulin-like receptor, subfamily A (without TM domain), member 3 [Source:HGNC Symbol;Acc:6604] |
| 1627 | ENSG00000261937 | 326.919098  | -1.690630714 | 0.178063093 | 2.54E-20 | LILRA3   | leukocyte immunoglobulin-like receptor, subfamily A (without TM domain), member 3 [Source:HGNC Symbol;Acc:6604] |
| 1628 | ENSG00000170866 | 326.9192586 | -1.690635355 | 0.178063587 | 2.54E-20 | LILRA3   | leukocyte immunoglobulin-like receptor, subfamily A (without TM domain), member 3 [Source:HGNC Symbol;Acc:6604] |
| 1629 | ENSG00000169994 | 726.7174392 | 1.493269669  | 0.15732827  | 2.62E-20 | MYO7B    | myosin VII B [Source:HGNC Symbol;Acc:7607]                                                                      |
| 1630 | ENSG00000112299 | 1368.312687 | -1.060666742 | 0.111813606 | 2.76E-20 | VNN1     | vanin 1 [Source:HGNC Symbol;Acc:12705]                                                                          |
| 1631 | ENSG00000145349 | 296.8571898 | 2.059206626  | 0.217163728 | 2.85E-20 | CAMK2D   | calcium/calmodulin-dependent protein kinase II delta [Source:HGNC Symbol;Acc:1462]                              |
| 1632 | ENSG00000234745 | 11476.18588 | 0.63799721   | 0.067305074 | 2.94E-20 | HLA-B    | major histocompatibility complex, class I, B [Source:HGNC Symbol;Acc:4932]                                      |
| 1633 | ENSG00000149091 | 6223.944279 | -0.80166027  | 0.084642614 | 3.17E-20 | DGKZ     | diacylglycerol kinase, zeta [Source:HGNC Symbol;Acc:2857]                                                       |
| 1634 | ENSG00000149806 | 5108.386429 | 0.718896174  | 0.075906289 | 3.18E-20 | FAU      | Finkel-Biskis-Reilly murine sarcoma virus (FBR-MuSV) ubiquitously expressed [Source:HGNC Symbol;Acc:3597]       |
| 1635 | ENSG00000154710 | 1157.463207 | -0.977975146 | 0.103278917 | 3.23E-20 | RABGEF1  | RAB guanine nucleotide exchange factor (GEF) 1 [Source:HGNC Symbol;Acc:17676]                                   |
| 1636 | ENSG0000009694  | 1058.976378 | -1.449867193 | 0.153134439 | 3.26E-20 | TENM1    | teneurin transmembrane protein 1 [Source:HGNC Symbol;Acc:8117]                                                  |
| 1637 | ENSG00000197405 | 16377.83797 | -0.451795094 | 0.047719823 | 3.27E-20 | C5AR1    | complement component 5a receptor 1 [Source:HGNC Symbol;Acc:1338]                                                |
| 1638 | ENSG00000121053 | 117.0535372 | -2.975565462 | 0.314405052 | 3.38E-20 | EPX      | eosinophil peroxidase [Source:HGNC Symbol;Acc:3423]                                                             |
| 1639 | ENSG00000102226 | 619.7002315 | 1.561226253  | 0.165023072 | 3.49E-20 | USP11    | ubiquitin specific peptidase 11 [Source:HGNC Symbol;Acc:12609]                                                  |
| 1640 | ENSG00000167524 | 743.1244349 | -1.142684947 | 0.1208374   | 3.64E-20 | SGK494   | uncharacterized serine/threonine-protein kinase SgK494 [Source:RefSeq peptide;Acc:NP_001274136]                 |
| 1641 | ENSG00000063046 | 8351.223888 | 0.527148577  | 0.055829815 | 4.17E-20 | EIF4B    | eukaryotic translation initiation factor 4B [Source:HGNC Symbol;Acc:3285]                                       |
| 1642 | ENSG00000122034 | 1992.726944 | 0.834995399  | 0.088537691 | 4.63E-20 | GTF3A    | general transcription factor IIIA [Source:HGNC Symbol;Acc:4662]                                                 |
| 1643 | ENSG00000120533 | 1615.552485 | -0.899438281 | 0.095397736 | 4.75E-20 | ENY2     | enhancer of yellow 2 homolog (Drosophila) [Source:HGNC Symbol;Acc:24449]                                        |
| 1644 | ENSG00000179304 | 1038.328097 | -1.441073813 | 0.152981197 | 5.14E-20 | FAM156B  | family with sequence similarity 156, member B [Source:HGNC Symbol;Acc:31962]                                    |
| 1645 | ENSG00000012048 | 587.3495985 | -1.252088976 | 0.13293712  | 5.20E-20 | BRCA1    | breast cancer 1, early onset [Source:HGNC Symbol;Acc:1100]                                                      |
| 1646 | ENSG00000140941 | 3075.072379 | -0.689001626 | 0.073166397 | 5.28E-20 | MAP1LC3B | microtubule-associated protein 1 light chain 3 beta [Source:HGNC Symbol;Acc:13352]                              |

|      |                 |             |              |             |          |          |                                                                                                                                         |
|------|-----------------|-------------|--------------|-------------|----------|----------|-----------------------------------------------------------------------------------------------------------------------------------------|
| 1647 | ENSG00000198740 | 2617.23261  | 0.710830279  | 0.0755949   | 6.02E-20 | ZNF652   | zinc finger protein 652 [Source:HGNC Symbol;Acc:29147]                                                                                  |
| 1648 | ENSG00000134333 | 5957.975118 | -0.573023101 | 0.061021213 | 6.78E-20 | LDHA     | lactate dehydrogenase A [Source:HGNC Symbol;Acc:6535]                                                                                   |
| 1649 | ENSG00000198231 | 3548.28576  | -0.636090591 | 0.067768112 | 7.05E-20 | DDX42    | DEAD (Asp-Glu-Ala-Asp) box helicase 42 [Source:HGNC Symbol;Acc:18676]                                                                   |
| 1650 | ENSG00000146670 | 324.2459397 | -1.815469217 | 0.193418048 | 7.05E-20 | CDCAS    | cell division cycle associated 5 [Source:HGNC Symbol;Acc:14626]                                                                         |
| 1651 | ENSG00000073111 | 666.8973705 | -1.287355859 | 0.137249386 | 7.50E-20 | MCM2     | minichromosome maintenance complex component 2 [Source:HGNC Symbol;Acc:6944]                                                            |
| 1652 | ENSG00000113810 | 1992.398064 | -0.753879519 | 0.080432052 | 8.00E-20 | SMC4     | structural maintenance of chromosomes 4 [Source:HGNC Symbol;Acc:14013]                                                                  |
| 1653 | ENSG00000093072 | 1887.292506 | 0.807770113  | 0.086189545 | 8.06E-20 | CECR1    | cat eye syndrome chromosome region, candidate 1 [Source:HGNC Symbol;Acc:1839]                                                           |
| 1654 | ENSG00000168675 | 833.4950551 | -1.16476705  | 0.124357842 | 8.50E-20 | LDLRAD4  | low density lipoprotein receptor class A domain containing 4 [Source:HGNC Symbol;Acc:1224]                                              |
| 1655 | ENSG00000112763 | 3191.922383 | 0.653646268  | 0.069807227 | 8.71E-20 | BTN2A1   | butyrophilin, subfamily 2, member A1 [Source:HGNC Symbol;Acc:1136]                                                                      |
| 1656 | ENSG00000188163 | 64.34825036 | -3.894636162 | 0.415999523 | 8.83E-20 | FAM166A  | family with sequence similarity 166, member A [Source:HGNC Symbol;Acc:33818]                                                            |
| 1657 | ENSG00000110934 | 15691.47862 | -0.421334905 | 0.045020931 | 9.12E-20 | BIN2     | bridging integrator 2 [Source:HGNC Symbol;Acc:1053]                                                                                     |
| 1658 | ENSG00000131626 | 1918.365694 | -0.778971235 | 0.083283483 | 9.59E-20 | PPFIA1   | protein tyrosine phosphatase, receptor type, f polypeptide (PTPRF), interacting protein (liprin), alpha 1 [Source:HGNC Symbol;Acc:9245] |
| 1659 | ENSG00000165030 | 1934.704043 | -0.759946981 | 0.081340521 | 1.06E-19 | NFIL3    | nuclear factor, interleukin 3 regulated [Source:HGNC Symbol;Acc:7787]                                                                   |
| 1660 | ENSG00000130309 | 3115.253154 | -0.682216878 | 0.073097526 | 1.16E-19 | COLGALT1 | collagen beta(1-O)galactosyltransferase 1 [Source:HGNC Symbol;Acc:26182]                                                                |
| 1661 | ENSG00000127124 | 196.8412668 | 2.351466286  | 0.251970379 | 1.17E-19 | HIVEP3   | human immunodeficiency virus type I enhancer binding protein 3 [Source:HGNC Symbol;Acc:13561]                                           |
| 1662 | ENSG00000100380 | 2272.887434 | 0.710421483  | 0.076137044 | 1.18E-19 | ST13     | suppression of tumorigenicity 13 (colon carcinoma) (Hsp70 interacting protein) [Source:HGNC Symbol;Acc:11343]                           |
| 1663 | ENSG00000107263 | 2391.388121 | 1.012702482  | 0.108540965 | 1.19E-19 | RAPGEF1  | Rap guanine nucleotide exchange factor (GEF) 1 [Source:HGNC Symbol;Acc:4568]                                                            |
| 1664 | ENSG00000115677 | 3898.629812 | -0.646346426 | 0.069321545 | 1.26E-19 | HDLBP    | high density lipoprotein binding protein [Source:HGNC Symbol;Acc:4857]                                                                  |
| 1665 | ENSG00000104361 | 788.6826898 | -1.238754226 | 0.132910609 | 1.31E-19 | NIPAL2   | NIPA-like domain containing 2 [Source:HGNC Symbol;Acc:25854]                                                                            |
| 1666 | ENSG00000205810 | 105.9165097 | 3.503341245  | 0.375980465 | 1.33E-19 | KLRC3    | killer cell lectin-like receptor subfamily C, member 3 [Source:HGNC Symbol;Acc:6376]                                                    |
| 1667 | ENSG00000237192 | 75.05109166 | -3.568914125 | 0.38317437  | 1.38E-19 | TRIM10   | tripartite motif containing 10 [Source:HGNC Symbol;Acc:10072]                                                                           |
| 1668 | ENSG00000111261 | 1783.217414 | -0.832834575 | 0.089448284 | 1.42E-19 | MANSC1   | MANSC domain containing 1 [Source:HGNC Symbol;Acc:25505]                                                                                |
| 1669 | ENSG00000054267 | 2224.478602 | 0.785775741  | 0.084456149 | 1.52E-19 | ARID4B   | AT rich interactive domain 4B (RBP1-like) [Source:HGNC Symbol;Acc:15550]                                                                |
| 1670 | ENSG00000115944 | 2112.48089  | -0.753656148 | 0.081077218 | 1.64E-19 | COX7A2L  | cytochrome c oxidase subunit VIIa polypeptide 2 like [Source:HGNC Symbol;Acc:2289]                                                      |
| 1671 | ENSG00000057704 | 1401.518618 | 0.894190266  | 0.096211645 | 1.66E-19 | TMCC3    | transmembrane and coiled-coil domain family 3 [Source:HGNC Symbol;Acc:29199]                                                            |
| 1672 | ENSG00000178498 | 262.9842211 | 2.150473968  | 0.231582926 | 1.79E-19 | DTX3     | deltex homolog 3 (Drosophila) [Source:HGNC Symbol;Acc:24457]                                                                            |
| 1673 | ENSG00000155926 | 5248.130917 | -0.561051575 | 0.060428726 | 1.82E-19 | SLA      | Src-like-adaptor [Source:HGNC Symbol;Acc:10902]                                                                                         |
| 1674 | ENSG00000101160 | 4714.720467 | -0.552200223 | 0.059563374 | 2.07E-19 | CTSZ     | cathepsin Z [Source:HGNC Symbol;Acc:2547]                                                                                               |

|      |                 |             |              |             |          |               |                                                                                                                  |
|------|-----------------|-------------|--------------|-------------|----------|---------------|------------------------------------------------------------------------------------------------------------------|
| 1675 | ENSG00000135932 | 4984.712188 | -0.531646752 | 0.057349555 | 2.07E-19 | CAB39         | calcium binding protein 39 [Source:HGNC Symbol;Acc:20292]                                                        |
| 1676 | ENSG00000205220 | 1011.62758  | 1.250225252  | 0.135044999 | 2.33E-19 | PSMB10        | proteasome (prosome, macropain) subunit, beta type, 10 [Source:HGNC Symbol;Acc:9538]                             |
| 1677 | ENSG00000174233 | 140.2162061 | 2.727961449  | 0.29485153  | 2.46E-19 | ADCY6         | adenylate cyclase 6 [Source:HGNC Symbol;Acc:237]                                                                 |
| 1678 | ENSG00000179862 | 551.9653935 | -1.363454181 | 0.147398142 | 2.50E-19 | CITED4        | Cbp/p300-interacting transactivator, with Glu/Asp-rich carboxy-terminal domain, 4 [Source:HGNC Symbol;Acc:18696] |
| 1679 | ENSG00000136573 | 221.9310933 | 2.177209456  | 0.235435659 | 2.56E-19 | BLK           | B lymphoid tyrosine kinase [Source:HGNC Symbol;Acc:1057]                                                         |
| 1680 | ENSG00000162836 | 606.2177406 | -1.2933472   | 0.139915721 | 2.65E-19 | ACP6          | acid phosphatase 6, lysophosphatidic [Source:HGNC Symbol;Acc:29609]                                              |
| 1681 | ENSG00000134109 | 3533.615651 | -0.657066845 | 0.071141415 | 2.85E-19 | EDEM1         | ER degradation enhancer, mannosidase alpha-like 1 [Source:HGNC Symbol;Acc:18967]                                 |
| 1682 | ENSG00000135437 | 467.0889923 | -1.47099856  | 0.159346166 | 2.97E-19 | RDH5          | retinol dehydrogenase 5 (11-cis/9-cis) [Source:HGNC Symbol;Acc:9940]                                             |
| 1683 | ENSG00000126705 | 167.6024654 | 2.620414405  | 0.283886504 | 3.00E-19 | AHDC1         | AT hook, DNA binding motif, containing 1 [Source:HGNC Symbol;Acc:25230]                                          |
| 1684 | ENSG00000185101 | 396.5390262 | 2.011836617  | 0.218048314 | 3.11E-19 | ANO9          | anoctamin 9 [Source:HGNC Symbol;Acc:20679]                                                                       |
| 1685 | ENSG00000179981 | 456.8043961 | 1.521880442  | 0.165048944 | 3.28E-19 | TSHZ1         | teashirt zinc finger homeobox 1 [Source:HGNC Symbol;Acc:10669]                                                   |
| 1686 | ENSG00000117560 | 134.0232873 | 2.749416662  | 0.2981863   | 3.28E-19 | FASLG         | Fas ligand (TNF superfamily, member 6) [Source:HGNC Symbol;Acc:11936]                                            |
| 1687 | ENSG00000077097 | 3829.975866 | 0.631847541  | 0.068537025 | 3.32E-19 | TOP2B         | topoisomerase (DNA) II beta 180kDa [Source:HGNC Symbol;Acc:11990]                                                |
| 1688 | ENSG00000123349 | 5586.692362 | 0.54894735   | 0.059548406 | 3.34E-19 | PFDN5         | prefoldin subunit 5 [Source:HGNC Symbol;Acc:8869]                                                                |
| 1689 | ENSG00000145741 | 4524.906838 | 0.568104162  | 0.061653847 | 3.47E-19 | BTF3          | basic transcription factor 3 [Source:HGNC Symbol;Acc:1125]                                                       |
| 1690 | ENSG00000240240 | 207.5060574 | -2.152427684 | 0.233642965 | 3.53E-19 | RP11-146D12.2 |                                                                                                                  |
| 1691 | ENSG00000027697 | 4242.712494 | 0.600521719  | 0.065203711 | 3.61E-19 | IFNGR1        | interferon gamma receptor 1 [Source:HGNC Symbol;Acc:5439]                                                        |
| 1692 | ENSG00000162714 | 450.3468241 | 1.421961458  | 0.154473874 | 3.77E-19 | ZNF496        | zinc finger protein 496 [Source:HGNC Symbol;Acc:23713]                                                           |
| 1693 | ENSG00000131462 | 287.3109506 | -1.719136669 | 0.186863856 | 3.96E-19 | TUBG1         | tubulin, gamma 1 [Source:HGNC Symbol;Acc:12417]                                                                  |
| 1694 | ENSG00000100503 | 6506.051919 | -0.558170099 | 0.060681184 | 4.01E-19 | NIN           | ninein (GSK3B interacting protein) [Source:HGNC Symbol;Acc:14906]                                                |
| 1695 | ENSG00000138172 | 300.1430228 | 1.996783903  | 0.217234312 | 4.26E-19 | CALHM2        | calcium homeostasis modulator 2 [Source:HGNC Symbol;Acc:23493]                                                   |
| 1696 | ENSG00000117450 | 1054.235831 | 0.996138244  | 0.10844757  | 4.52E-19 | PRDX1         | peroxiredoxin 1 [Source:HGNC Symbol;Acc:9352]                                                                    |
| 1697 | ENSG00000141504 | 1134.864231 | -0.90339186  | 0.098362827 | 4.57E-19 | SAT2          | spermidine/spermine N1-acetyltransferase family member 2 [Source:HGNC Symbol;Acc:23160]                          |
| 1698 | ENSG00000005156 | 916.029314  | -1.216905911 | 0.1325229   | 4.64E-19 | LIG3          | ligase III, DNA, ATP-dependent [Source:HGNC Symbol;Acc:6600]                                                     |
| 1699 | ENSG00000164010 | 604.4408553 | -1.205490723 | 0.131328717 | 4.78E-19 | ERMAP         | erythroblast membrane-associated protein (Scianna blood group) [Source:HGNC Symbol;Acc:15743]                    |
| 1700 | ENSG00000170962 | 135.4815103 | 2.800399554  | 0.305116581 | 4.83E-19 | PDGFD         | platelet derived growth factor D [Source:HGNC Symbol;Acc:30620]                                                  |
| 1701 | ENSG00000169228 | 5722.079254 | -0.539523302 | 0.058786703 | 4.85E-19 | RAB24         | RAB24, member RAS oncogene family [Source:HGNC Symbol;Acc:9765]                                                  |
| 1702 | ENSG00000162729 | 247.4304916 | 2.114516751  | 0.230450926 | 4.94E-19 | IGSF8         | immunoglobulin superfamily, member 8 [Source:HGNC Symbol;Acc:17813]                                              |

|      |                 |             |              |             |          |          |                                                                                                         |
|------|-----------------|-------------|--------------|-------------|----------|----------|---------------------------------------------------------------------------------------------------------|
| 1703 | ENSG00000164045 | 162.0673958 | -2.377043886 | 0.259189236 | 5.15E-19 | CDC25A   | cell division cycle 25A [Source:HGNC Symbol;Acc:1725]                                                   |
| 1704 | ENSG00000196757 | 1694.210821 | -0.827681478 | 0.090333827 | 5.57E-19 | ZNF700   | zinc finger protein 700 [Source:HGNC Symbol;Acc:25292]                                                  |
| 1705 | ENSG00000166507 | 1220.296981 | -1.029440689 | 0.11236622  | 5.62E-19 | NDST2    | N-deacetylase/N-sulfotransferase (heparan glucosaminyl) 2 [Source:HGNC Symbol;Acc:7681]                 |
| 1706 | ENSG00000124126 | 10082.00133 | 0.594580635  | 0.065007202 | 6.46E-19 | PREX1    | phosphatidylinositol-3,4,5-trisphosphate-dependent Rac exchange factor 1 [Source:HGNC Symbol;Acc:32594] |
| 1707 | ENSG00000175040 | 455.7781899 | 1.462039636  | 0.159882556 | 6.57E-19 | CHST2    | carbohydrate (N-acetylglucosamine-6-O) sulfotransferase 2 [Source:HGNC Symbol;Acc:1970]                 |
| 1708 | ENSG00000224106 | 106.6132313 | -2.839031146 | 0.31055854  | 6.74E-19 | CYP4F25P | cytochrome P450, family 4, subfamily F, polypeptide 25, pseudogene [Source:HGNC Symbol;Acc:39949]       |
| 1709 | ENSG00000182511 | 3025.116798 | -0.993074941 | 0.108652618 | 6.84E-19 | FES      | feline sarcoma oncogene [Source:HGNC Symbol;Acc:3657]                                                   |
| 1710 | ENSG00000179715 | 439.4893815 | 1.636868527  | 0.179120128 | 6.94E-19 | PCED1B   | PC-esterase domain containing 1B [Source:HGNC Symbol;Acc:28255]                                         |
| 1711 | ENSG00000072694 | 1376.675669 | 0.877178298  | 0.096026368 | 7.17E-19 | FCGR2B   | Fc fragment of IgG, low affinity IIb, receptor (CD32) [Source:HGNC Symbol;Acc:3618]                     |
| 1712 | ENSG00000008283 | 308.3692475 | 1.837049946  | 0.201113963 | 7.19E-19 | CYB561   | cytochrome b561 [Source:HGNC Symbol;Acc:2571]                                                           |
| 1713 | ENSG00000142945 | 264.8528422 | -2.329484662 | 0.255044821 | 7.24E-19 | KIF2C    | kinesin family member 2C [Source:HGNC Symbol;Acc:6393]                                                  |
| 1714 | ENSG00000141480 | 20600.27634 | -0.413735857 | 0.045299236 | 7.25E-19 | ARRB2    | arrestin, beta 2 [Source:HGNC Symbol;Acc:712]                                                           |
| 1715 | ENSG00000197771 | 2669.811225 | -0.653731913 | 0.071607913 | 7.52E-19 | MCMBP    | minichromosome maintenance complex binding protein [Source:HGNC Symbol;Acc:25782]                       |
| 1716 | ENSG00000146192 | 519.3242229 | 1.378149181  | 0.150959554 | 7.52E-19 | FGD2     | FYVE, RhoGEF and PH domain containing 2 [Source:HGNC Symbol;Acc:3664]                                   |
| 1717 | ENSG00000163644 | 803.6377071 | 1.209205472  | 0.132468639 | 7.59E-19 | PPM1K    | protein phosphatase, Mg <sup>2+</sup> /Mn <sup>2+</sup> dependent, 1K [Source:HGNC Symbol;Acc:25415]    |
| 1718 | ENSG00000145220 | 450.3794585 | 1.446543478  | 0.158488886 | 7.66E-19 | LYAR     | Ly1 antibody reactive [Source:HGNC Symbol;Acc:26021]                                                    |
| 1719 | ENSG00000073849 | 2512.612876 | 0.695070198  | 0.076169119 | 7.78E-19 | ST6GAL1  | ST6 beta-galactosamide alpha-2,6-sialyltransferase 1 [Source:HGNC Symbol;Acc:10860]                     |
| 1720 | ENSG00000213085 | 170.2610514 | 2.526195779  | 0.276868615 | 7.87E-19 | CCDC19   | coiled-coil domain containing 19 [Source:HGNC Symbol;Acc:17229]                                         |
| 1721 | ENSG00000090686 | 3488.716625 | -0.674871018 | 0.074044902 | 8.61E-19 | USP48    | ubiquitin specific peptidase 48 [Source:HGNC Symbol;Acc:18533]                                          |
| 1722 | ENSG00000197746 | 32556.24809 | -0.379498513 | 0.041667781 | 9.14E-19 | PSAP     | prosaposin [Source:HGNC Symbol;Acc:9498]                                                                |
| 1723 | ENSG00000096070 | 1448.586097 | -0.846403517 | 0.09294269  | 9.22E-19 | BRPF3    | bromodomain and PHD finger containing, 3 [Source:HGNC Symbol;Acc:14256]                                 |
| 1724 | ENSG00000109787 | 3426.339046 | 0.650606832  | 0.071464693 | 9.46E-19 | KLF3     | Kruppel-like factor 3 (basic) [Source:HGNC Symbol;Acc:16516]                                            |
| 1725 | ENSG00000169193 | 448.9506909 | -1.401233568 | 0.153928762 | 9.52E-19 | CCDC126  | coiled-coil domain containing 126 [Source:HGNC Symbol;Acc:22398]                                        |
| 1726 | ENSG00000157978 | 1546.028242 | 1.022269558  | 0.112302693 | 9.54E-19 | LDLRAP1  | low density lipoprotein receptor adaptor protein 1 [Source:HGNC Symbol;Acc:18640]                       |
| 1727 | ENSG00000106948 | 8460.692469 | 0.670488015  | 0.07370469  | 1.01E-18 | AKNA     | AT-hook transcription factor [Source:HGNC Symbol;Acc:24108]                                             |
| 1728 | ENSG00000100034 | 2705.682634 | 0.895538654  | 0.098544066 | 1.10E-18 | PPM1F    | protein phosphatase, Mg <sup>2+</sup> /Mn <sup>2+</sup> dependent, 1F [Source:HGNC Symbol;Acc:19388]    |
| 1729 | ENSG00000092929 | 5908.203605 | -0.777949948 | 0.085604992 | 1.10E-18 | UNC13D   | unc-13 homolog D (C. elegans) [Source:HGNC Symbol;Acc:23147]                                            |
| 1730 | ENSG00000188643 | 52.41805258 | 4.421076562  | 0.486529522 | 1.10E-18 | S100A16  | S100 calcium binding protein A16 [Source:HGNC Symbol;Acc:20441]                                         |

|      |                 |             |              |             |          |                |                                                                                                                                             |
|------|-----------------|-------------|--------------|-------------|----------|----------------|---------------------------------------------------------------------------------------------------------------------------------------------|
| 1731 | ENSG00000160185 | 308.8561604 | 1.832002578  | 0.201680334 | 1.13E-18 | UBASH3A        | ubiquitin associated and SH3 domain containing A [Source:HGNC Symbol;Acc:12462]                                                             |
| 1732 | ENSG00000184005 | 212.5781519 | -2.09727334  | 0.230954917 | 1.16E-18 | ST6GALNAC3     | ST6 (alpha-N-acetyl-neuraminy-2,3-beta-galactosyl-1,3)-N-acetylgalactosaminide alpha-2,6-sialyltransferase 3 [Source:HGNC Symbol;Acc:19343] |
| 1733 | ENSG00000154358 | 328.1963754 | 1.871511011  | 0.206175981 | 1.20E-18 | OBSCN          | obscurin, cytoskeletal calmodulin and titin-interacting RhoGEF [Source:HGNC Symbol;Acc:15719]                                               |
| 1734 | ENSG00000138767 | 2231.274588 | 0.703657257  | 0.077522397 | 1.21E-18 | CNOT6L         | CCR4-NOT transcription complex, subunit 6-like [Source:HGNC Symbol;Acc:18042]                                                               |
| 1735 | ENSG00000165879 | 1542.066967 | 0.864001875  | 0.095236335 | 1.26E-18 | FRAT1          | frequently rearranged in advanced T-cell lymphomas [Source:HGNC Symbol;Acc:3944]                                                            |
| 1736 | ENSG00000139508 | 487.6525477 | 1.369655797  | 0.151106348 | 1.35E-18 | SLC46A3        | solute carrier family 46, member 3 [Source:HGNC Symbol;Acc:27501]                                                                           |
| 1737 | ENSG00000248592 | 986.5269617 | -0.989921603 | 0.109277739 | 1.42E-18 | TMEM110-MUSTN1 | TMEM110-MUSTN1 readthrough [Source:HGNC Symbol;Acc:38834]                                                                                   |
| 1738 | ENSG00000134108 | 1824.131874 | -0.929711558 | 0.102635726 | 1.43E-18 | ARL8B          | ADP-ribosylation factor-like 8B [Source:HGNC Symbol;Acc:25564]                                                                              |
| 1739 | ENSG00000153898 | 242.4288175 | 1.946452075  | 0.214887636 | 1.43E-18 | MCOLN2         | mucoilin 2 [Source:HGNC Symbol;Acc:13357]                                                                                                   |
| 1740 | ENSG00000167658 | 11631.31171 | 0.537652502  | 0.059374026 | 1.46E-18 | EEF2           | eukaryotic translation elongation factor 2 [Source:HGNC Symbol;Acc:3214]                                                                    |
| 1741 | ENSG00000148484 | 1999.489574 | -0.754147088 | 0.083310154 | 1.50E-18 | RSU1           | Ras suppressor protein 1 [Source:HGNC Symbol;Acc:10464]                                                                                     |
| 1742 | ENSG00000143514 | 976.3105437 | -1.011056727 | 0.111723508 | 1.54E-18 | TP53BP2        | tumor protein p53 binding protein, 2 [Source:HGNC Symbol;Acc:12000]                                                                         |
| 1743 | ENSG00000229685 | 120.9000759 | 2.72159155   | 0.300893456 | 1.61E-18 | HLA-DPA1       | major histocompatibility complex, class II, DP alpha 1 [Source:HGNC Symbol;Acc:4938]                                                        |
| 1744 | ENSG00000166439 | 1958.512461 | 0.734679769  | 0.081248355 | 1.64E-18 | RNF169         | ring finger protein 169 [Source:HGNC Symbol;Acc:26961]                                                                                      |
| 1745 | ENSG00000143401 | 2163.694358 | -0.803321253 | 0.088871683 | 1.69E-18 | ANP32E         | acidic (leucine-rich) nuclear phosphoprotein 32 family, member E [Source:HGNC Symbol;Acc:16673]                                             |
| 1746 | ENSG00000137802 | 789.8824711 | 1.218231786  | 0.134801326 | 1.72E-18 | MAPKBP1        | mitogen-activated protein kinase binding protein 1 [Source:HGNC Symbol;Acc:29536]                                                           |
| 1747 | ENSG00000114770 | 4869.462885 | -0.566036174 | 0.06263792  | 1.73E-18 | ABCC5          | ATP-binding cassette, sub-family C (CFTR/MRP), member 5 [Source:HGNC Symbol;Acc:56]                                                         |
| 1748 | ENSG00000182319 | 159.3004416 | 2.522998425  | 0.279460079 | 1.87E-18 | SGK223         | Tyrosine-protein kinase Sgk223 [Source:UniProtKB/Swiss-Prot;Acc:Q86YV5]                                                                     |
| 1749 | ENSG00000117632 | 2792.70485  | -0.687988022 | 0.076210881 | 1.88E-18 | STMN1          | stathmin 1 [Source:HGNC Symbol;Acc:6510]                                                                                                    |
| 1750 | ENSG00000272578 | 2129.088162 | -0.694213194 | 0.076952663 | 1.99E-18 | AP000347.2     |                                                                                                                                             |
| 1751 | ENSG00000137486 | 1338.022601 | 0.944259681  | 0.104834736 | 2.26E-18 | ARRB1          | arrestin, beta 1 [Source:HGNC Symbol;Acc:711]                                                                                               |
| 1752 | ENSG00000060558 | 553.3641165 | 1.343262411  | 0.149199878 | 2.34E-18 | GNA15          | guanine nucleotide binding protein (G protein), alpha 15 (Gq class) [Source:HGNC Symbol;Acc:4383]                                           |
| 1753 | ENSG00000169607 | 190.6935034 | -2.252538501 | 0.250363976 | 2.48E-18 | CKAP2L         | cytoskeleton associated protein 2-like [Source:HGNC Symbol;Acc:26877]                                                                       |
| 1754 | ENSG00000135720 | 3738.891859 | -0.650107076 | 0.072262173 | 2.49E-18 | DYNC1LI2       | dynein, cytoplasmic 1, light intermediate chain 2 [Source:HGNC Symbol;Acc:2966]                                                             |
| 1755 | ENSG00000223448 | 360.5535572 | 1.618738082  | 0.180060828 | 2.64E-18 | LTB            | lymphotoxin beta (TNF superfamily, member 3) [Source:HGNC Symbol;Acc:6711]                                                                  |
| 1756 | ENSG00000236237 | 360.3638027 | 1.617483744  | 0.179935499 | 2.65E-18 | LTB            | lymphotoxin beta (TNF superfamily, member 3) [Source:HGNC Symbol;Acc:6711]                                                                  |
| 1757 | ENSG00000141252 | 1895.256495 | -1.093993578 | 0.121705868 | 2.66E-18 | VPS53          | vacuolar protein sorting 53 homolog (S. cerevisiae) [Source:HGNC Symbol;Acc:25608]                                                          |
| 1758 | ENSG00000156535 | 174.8082338 | 2.234770832  | 0.248624429 | 2.67E-18 | CD109          | CD109 molecule [Source:HGNC Symbol;Acc:21685]                                                                                               |

|      |                 |             |              |             |          |              |                                                                                                    |
|------|-----------------|-------------|--------------|-------------|----------|--------------|----------------------------------------------------------------------------------------------------|
| 1759 | ENSG00000137078 | 198.1057986 | 2.267138236  | 0.252249477 | 2.69E-18 | SIT1         | signaling threshold regulating transmembrane adaptor 1 [Source:HGNC Symbol;Acc:17710]              |
| 1760 | ENSG00000179909 | 323.1037828 | 1.628552019  | 0.18142278  | 2.97E-18 | ZNF154       | zinc finger protein 154 [Source:HGNC Symbol;Acc:12939]                                             |
| 1761 | ENSG00000111348 | 43654.92545 | -0.389637429 | 0.043436193 | 3.14E-18 | ARHGDI3      | Rho GDP dissociation inhibitor (GDI) beta [Source:HGNC Symbol;Acc:679]                             |
| 1762 | ENSG00000088930 | 2086.795047 | 0.758101333  | 0.084525937 | 3.18E-18 | XRN2         | 5'-3' exoribonuclease 2 [Source:HGNC Symbol;Acc:12836]                                             |
| 1763 | ENSG00000178199 | 249.9318774 | 1.949198607  | 0.217354678 | 3.21E-18 | ZC3H12D      | zinc finger CCCH-type containing 12D [Source:HGNC Symbol;Acc:21175]                                |
| 1764 | ENSG00000263228 | 45.37402897 | 4.497785494  | 0.501577842 | 3.22E-18 | RP11-44D15.6 |                                                                                                    |
| 1765 | ENSG00000160685 | 3222.845384 | -0.762203944 | 0.085017668 | 3.28E-18 | ZBTB7B       | zinc finger and BTB domain containing 7B [Source:HGNC Symbol;Acc:18668]                            |
| 1766 | ENSG00000241106 | 298.4148983 | 1.878957488  | 0.20971695  | 3.46E-18 | HLA-DOB      | major histocompatibility complex, class II, DO beta [Source:HGNC Symbol;Acc:4937]                  |
| 1767 | ENSG00000243811 | 298.6937971 | 1.786229835  | 0.199376171 | 3.47E-18 | APOBEC3D     | apolipoprotein B mRNA editing enzyme, catalytic polypeptide-like 3D [Source:HGNC Symbol;Acc:17354] |
| 1768 | ENSG00000173821 | 12693.28793 | 0.412168701  | 0.046006847 | 3.47E-18 | RNF213       | ring finger protein 213 [Source:HGNC Symbol;Acc:14539]                                             |
| 1769 | ENSG00000040341 | 767.7152616 | -1.109783288 | 0.123892382 | 3.51E-18 | STAU2        | staufen double-stranded RNA binding protein 2 [Source:HGNC Symbol;Acc:11371]                       |
| 1770 | ENSG00000154760 | 2325.418926 | -0.73420555  | 0.082003411 | 3.65E-18 | SLFN13       | schlafen family member 13 [Source:HGNC Symbol;Acc:26481]                                           |
| 1771 | ENSG00000112984 | 228.8541091 | -1.989586447 | 0.222254314 | 3.69E-18 | KIF20A       | kinesin family member 20A [Source:HGNC Symbol;Acc:9787]                                            |
| 1772 | ENSG00000070019 | 175.3066743 | -2.197658916 | 0.245526251 | 3.73E-18 | GUCY2C       | guanylate cyclase 2C (heat stable enterotoxin receptor) [Source:HGNC Symbol;Acc:4688]              |
| 1773 | ENSG00000236925 | 360.1514331 | 1.615572155  | 0.180526419 | 3.78E-18 | LTB          | lymphotoxin beta (TNF superfamily, member 3) [Source:HGNC Symbol;Acc:6711]                         |
| 1774 | ENSG00000206437 | 360.1515317 | 1.615572682  | 0.180526533 | 3.78E-18 | LTB          | lymphotoxin beta (TNF superfamily, member 3) [Source:HGNC Symbol;Acc:6711]                         |
| 1775 | ENSG00000114737 | 636.1208257 | -1.224372601 | 0.136822612 | 3.80E-18 | CISH         | cytokine inducible SH2-containing protein [Source:HGNC Symbol;Acc:1984]                            |
| 1776 | ENSG00000170365 | 155.8289381 | 3.026754842  | 0.338421288 | 3.96E-18 | SMAD1        | SMAD family member 1 [Source:HGNC Symbol;Acc:6767]                                                 |
| 1777 | ENSG00000108819 | 3787.83822  | 0.760234691  | 0.085008347 | 3.99E-18 | PPP1R9B      | protein phosphatase 1, regulatory subunit 9B [Source:HGNC Symbol;Acc:9298]                         |
| 1778 | ENSG00000143476 | 257.4098096 | -2.001936322 | 0.223922636 | 4.08E-18 | DTL          | denticleless E3 ubiquitin protein ligase homolog (Drosophila) [Source:HGNC Symbol;Acc:30288]       |
| 1779 | ENSG00000136827 | 1480.019543 | -0.802812303 | 0.089824229 | 4.18E-18 | TOR1A        | torsin family 1, member A (torsin A) [Source:HGNC Symbol;Acc:3098]                                 |
| 1780 | ENSG00000204487 | 360.0190606 | 1.614549397  | 0.180678596 | 4.24E-18 | LTB          | lymphotoxin beta (TNF superfamily, member 3) [Source:HGNC Symbol;Acc:6711]                         |
| 1781 | ENSG00000231314 | 360.0190119 | 1.614548141  | 0.180678752 | 4.24E-18 | LTB          | lymphotoxin beta (TNF superfamily, member 3) [Source:HGNC Symbol;Acc:6711]                         |
| 1782 | ENSG00000238114 | 360.0189847 | 1.614546831  | 0.180679007 | 4.24E-18 | LTB          | lymphotoxin beta (TNF superfamily, member 3) [Source:HGNC Symbol;Acc:6711]                         |
| 1783 | ENSG00000181458 | 863.2357279 | -1.032155548 | 0.115596386 | 4.51E-18 | TMEM45A      | transmembrane protein 45A [Source:HGNC Symbol;Acc:25480]                                           |
| 1784 | ENSG00000132819 | 1715.90077  | -1.065406552 | 0.119608238 | 5.48E-18 | RBM38        | RNA binding motif protein 38 [Source:HGNC Symbol;Acc:15818]                                        |
| 1785 | ENSG00000164877 | 241.450275  | -1.946250113 | 0.21860554  | 5.70E-18 | MICALL2      | MICAL-like 2 [Source:HGNC Symbol;Acc:29672]                                                        |
| 1786 | ENSG00000163874 | 912.5032018 | -1.154605173 | 0.129701743 | 5.75E-18 | ZC3H12A      | zinc finger CCCH-type containing 12A [Source:HGNC Symbol;Acc:26259]                                |

|      |                 |             |              |             |          |           |                                                                                                                    |
|------|-----------------|-------------|--------------|-------------|----------|-----------|--------------------------------------------------------------------------------------------------------------------|
| 1787 | ENSG00000140534 | 185.246712  | -2.126552253 | 0.239018136 | 6.01E-18 | TICRR     | TOPBP1-interacting checkpoint and replication regulator [Source:HGNC Symbol;Acc:28704]                             |
| 1788 | ENSG00000121417 | 621.152304  | 1.195925031  | 0.134428861 | 6.04E-18 | ZNF211    | zinc finger protein 211 [Source:HGNC Symbol;Acc:13003]                                                             |
| 1789 | ENSG00000196968 | 537.7808675 | 1.266524862  | 0.14238836  | 6.12E-18 | FUT11     | fucosyltransferase 11 (alpha (1,3) fucosyltransferase) [Source:HGNC Symbol;Acc:19233]                              |
| 1790 | ENSG00000152926 | 2162.324218 | 0.757201231  | 0.085149069 | 6.24E-18 | ZNF117    | zinc finger protein 117 [Source:HGNC Symbol;Acc:12897]                                                             |
| 1791 | ENSG00000171101 | 159.3356655 | 2.50696794   | 0.282124704 | 6.62E-18 | SIGLEC17P | sialic acid binding Ig-like lectin 17, pseudogene [Source:HGNC Symbol;Acc:15604]                                   |
| 1792 | ENSG00000261900 | 2214.443569 | -0.735478541 | 0.082821872 | 6.97E-18 | ZNF518A   | zinc finger protein 518A [Source:HGNC Symbol;Acc:29009]                                                            |
| 1793 | ENSG00000110076 | 52.93423837 | 4.151580668  | 0.467857929 | 7.39E-18 | NRXN2     | neurexin 2 [Source:HGNC Symbol;Acc:8009]                                                                           |
| 1794 | ENSG00000164086 | 446.3341305 | 1.416410017  | 0.159775938 | 7.98E-18 | DUSP7     | dual specificity phosphatase 7 [Source:HGNC Symbol;Acc:3073]                                                       |
| 1795 | ENSG00000148908 | 565.7554373 | 1.305979769  | 0.147444439 | 8.54E-18 | RGS10     | regulator of G-protein signaling 10 [Source:HGNC Symbol;Acc:9992]                                                  |
| 1796 | ENSG00000122359 | 10433.44993 | -0.51469234  | 0.058126659 | 8.75E-18 | ANXA11    | annexin A11 [Source:HGNC Symbol;Acc:535]                                                                           |
| 1797 | ENSG00000108946 | 7219.96937  | 0.539010314  | 0.060882005 | 8.84E-18 | PRKAR1A   | protein kinase, cAMP-dependent, regulatory, type I, alpha [Source:HGNC Symbol;Acc:9388]                            |
| 1798 | ENSG00000197070 | 2063.193228 | -0.850393707 | 0.09610447  | 9.22E-18 | ARRDC1    | arrestin domain containing 1 [Source:HGNC Symbol;Acc:28633]                                                        |
| 1799 | ENSG00000167461 | 2416.785295 | 0.720416697  | 0.081460472 | 9.63E-18 | RAB8A     | RAB8A, member RAS oncogene family [Source:HGNC Symbol;Acc:7007]                                                    |
| 1800 | ENSG00000074356 | 1733.89807  | -0.753166648 | 0.085218661 | 1.01E-17 | C17orf85  | chromosome 17 open reading frame 85 [Source:HGNC Symbol;Acc:24612]                                                 |
| 1801 | ENSG00000118900 | 5382.034998 | -0.532573338 | 0.060262042 | 1.02E-17 | UBN1      | ubiquitin 1 [Source:HGNC Symbol;Acc:12506]                                                                         |
| 1802 | ENSG00000136404 | 1262.287936 | -0.906632085 | 0.102604129 | 1.03E-17 | TM6SF1    | transmembrane 6 superfamily member 1 [Source:HGNC Symbol;Acc:11860]                                                |
| 1803 | ENSG00000184040 | 214.9198801 | 2.519865964  | 0.285294259 | 1.06E-17 | TMEM236   |                                                                                                                    |
| 1804 | ENSG00000175215 | 8235.062294 | 0.455769751  | 0.051606114 | 1.07E-17 | CTDSP2    | CTD (carboxy-terminal domain, RNA polymerase II, polypeptide A) small phosphatase 2 [Source:HGNC Symbol;Acc:17077] |
| 1805 | ENSG00000106546 | 528.584224  | 1.458925788  | 0.165191994 | 1.07E-17 | AHR       | aryl hydrocarbon receptor [Source:HGNC Symbol;Acc:348]                                                             |
| 1806 | ENSG00000179456 | 3152.310631 | 0.614774851  | 0.069642711 | 1.11E-17 | ZBTB18    | zinc finger and BTB domain containing 18 [Source:HGNC Symbol;Acc:13030]                                            |
| 1807 | ENSG00000136003 | 2205.545316 | 0.682085131  | 0.07728702  | 1.13E-17 | ISCU      | iron-sulfur cluster assembly enzyme [Source:HGNC Symbol;Acc:29882]                                                 |
| 1808 | ENSG00000229684 | 1286.553528 | -0.816318909 | 0.092498983 | 1.13E-17 | TUBB      | tubulin, beta class I [Source:HGNC Symbol;Acc:20778]                                                               |
| 1809 | ENSG00000232575 | 1286.734308 | -0.816232968 | 0.092497875 | 1.14E-17 | TUBB      | tubulin, beta class I [Source:HGNC Symbol;Acc:20778]                                                               |
| 1810 | ENSG00000065154 | 997.8860869 | -0.941287711 | 0.106694709 | 1.16E-17 | OAT       | ornithine aminotransferase [Source:HGNC Symbol;Acc:8091]                                                           |
| 1811 | ENSG00000167094 | 219.8891932 | 1.967713637  | 0.223047717 | 1.16E-17 | TTC16     | tetratricopeptide repeat domain 16 [Source:HGNC Symbol;Acc:26536]                                                  |
| 1812 | ENSG00000231389 | 116.2017033 | 2.720745718  | 0.308410627 | 1.16E-17 | HLA-DPA1  | major histocompatibility complex, class II, DP alpha 1 [Source:HGNC Symbol;Acc:4938]                               |
| 1813 | ENSG00000224156 | 1286.372753 | -0.815767637 | 0.092492532 | 1.18E-17 | TUBB      | tubulin, beta class I [Source:HGNC Symbol;Acc:20778]                                                               |
| 1814 | ENSG00000235067 | 1286.529314 | -0.815767116 | 0.092496794 | 1.19E-17 | TUBB      | tubulin, beta class I [Source:HGNC Symbol;Acc:20778]                                                               |

|      |                 |             |              |             |          |            |                                                                                                            |
|------|-----------------|-------------|--------------|-------------|----------|------------|------------------------------------------------------------------------------------------------------------|
| 1815 | ENSG00000232421 | 1286.685921 | -0.81576633  | 0.092502137 | 1.19E-17 | TUBB       | tubulin, beta class I [Source:HGNC Symbol;Acc:20778]                                                       |
| 1816 | ENSG00000196230 | 1287.446133 | -0.816350377 | 0.092576055 | 1.20E-17 | TUBB       | tubulin, beta class I [Source:HGNC Symbol;Acc:20778]                                                       |
| 1817 | ENSG00000089775 | 665.6428854 | 1.202871925  | 0.1364717   | 1.24E-17 | ZBTB25     | zinc finger and BTB domain containing 25 [Source:HGNC Symbol;Acc:13112]                                    |
| 1818 | ENSG00000117090 | 292.6474066 | 1.81858182   | 0.206354705 | 1.26E-17 | SLAMF1     | signaling lymphocytic activation molecule family member 1 [Source:HGNC Symbol;Acc:10903]                   |
| 1819 | ENSG00000165685 | 240.6523077 | -1.848479764 | 0.209754002 | 1.26E-17 | TMEM52B    | transmembrane protein 52B [Source:HGNC Symbol;Acc:26438]                                                   |
| 1820 | ENSG00000135052 | 714.8335618 | -1.164674226 | 0.132229746 | 1.31E-17 | GOLM1      | golgi membrane protein 1 [Source:HGNC Symbol;Acc:15451]                                                    |
| 1821 | ENSG00000262472 | 510.5259798 | -1.341624712 | 0.152379372 | 1.35E-17 | KPNA2      | karyopherin alpha 2 (RAG cohort 1, importin alpha 1) [Source:HGNC Symbol;Acc:6395]                         |
| 1822 | ENSG00000182481 | 510.5207999 | -1.341565326 | 0.152377899 | 1.35E-17 | KPNA2      | karyopherin alpha 2 (RAG cohort 1, importin alpha 1) [Source:HGNC Symbol;Acc:6395]                         |
| 1823 | ENSG00000173706 | 298.7997816 | 2.049756604  | 0.233074043 | 1.48E-17 | HEG1       | heart development protein with EGF-like domains 1 [Source:HGNC Symbol;Acc:29227]                           |
| 1824 | ENSG00000139597 | 664.8867894 | 1.188350643  | 0.135202291 | 1.54E-17 | N4BP2L1    | NEDD4 binding protein 2-like 1 [Source:HGNC Symbol;Acc:25037]                                              |
| 1825 | ENSG00000172215 | 132.7963733 | 2.718836715  | 0.309454889 | 1.59E-17 | CXCR6      | chemokine (C-X-C motif) receptor 6 [Source:HGNC Symbol;Acc:16647]                                          |
| 1826 | ENSG00000115107 | 262.436219  | -1.759456413 | 0.200275956 | 1.60E-17 | STEAP3     | STEAP family member 3, metalloreductase [Source:HGNC Symbol;Acc:24592]                                     |
| 1827 | ENSG00000146376 | 387.2456165 | -1.483042036 | 0.168826016 | 1.61E-17 | ARHGAP18   | Rho GTPase activating protein 18 [Source:HGNC Symbol;Acc:21035]                                            |
| 1828 | ENSG00000125384 | 789.8713961 | 1.076493005  | 0.122652599 | 1.72E-17 | PTGER2     | prostaglandin E receptor 2 (subtype EP2), 53kDa [Source:HGNC Symbol;Acc:9594]                              |
| 1829 | ENSG00000166289 | 142.1084161 | 2.692702726  | 0.306825548 | 1.73E-17 | PLEKHF1    | pleckstrin homology domain containing, family F (with FYVE domain) member 1 [Source:HGNC Symbol;Acc:20764] |
| 1830 | ENSG00000171130 | 313.7115003 | 1.734294455  | 0.197712555 | 1.80E-17 | ATP6V0E2   | ATPase, H+ transporting V0 subunit e2 [Source:HGNC Symbol;Acc:21723]                                       |
| 1831 | ENSG0000021300  | 135.5831042 | 2.658252226  | 0.303226281 | 1.88E-17 | PLEKHB1    | pleckstrin homology domain containing, family B (evectins) member 1 [Source:HGNC Symbol;Acc:19079]         |
| 1832 | ENSG00000137845 | 3375.331411 | 0.582643692  | 0.066473464 | 1.91E-17 | ADAM10     | ADAM metalloproteinase domain 10 [Source:HGNC Symbol;Acc:188]                                              |
| 1833 | ENSG00000246575 | 329.5775547 | -1.586587604 | 0.18112683  | 2.00E-17 | AC093162.5 |                                                                                                            |
| 1834 | ENSG00000198932 | 369.8851152 | 1.634073443  | 0.18658079  | 2.03E-17 | GPRASP1    | G protein-coupled receptor associated sorting protein 1 [Source:HGNC Symbol;Acc:24834]                     |
| 1835 | ENSG00000134061 | 300.1852416 | 1.698787529  | 0.194084303 | 2.12E-17 | CD180      | CD180 molecule [Source:HGNC Symbol;Acc:6726]                                                               |
| 1836 | ENSG00000227063 | 3465.338131 | 0.806629969  | 0.092170665 | 2.15E-17 | RPL41P1    | ribosomal protein L41 pseudogene 1 [Source:HGNC Symbol;Acc:10356]                                          |
| 1837 | ENSG00000104852 | 5534.159658 | 0.602584758  | 0.0688656   | 2.17E-17 | SNRNP70    | small nuclear ribonucleoprotein 70kDa (U1) [Source:HGNC Symbol;Acc:11150]                                  |
| 1838 | ENSG00000206208 | 3032.861828 | 0.685653557  | 0.078369791 | 2.19E-17 | TAPBP      | TAP binding protein (tapasin) [Source:HGNC Symbol;Acc:11566]                                               |
| 1839 | ENSG00000156575 | 37.29677218 | -4.530619383 | 0.517999753 | 2.24E-17 | PRG3       | proteoglycan 3 [Source:HGNC Symbol;Acc:9363]                                                               |
| 1840 | ENSG00000070190 | 1893.217575 | 0.736376185  | 0.08419813  | 2.25E-17 | DAPP1      | dual adaptor of phosphotyrosine and 3-phosphoinositides [Source:HGNC Symbol;Acc:16500]                     |
| 1841 | ENSG00000167635 | 981.93297   | 1.006474371  | 0.115112355 | 2.30E-17 | ZNF146     | zinc finger protein 146 [Source:HGNC Symbol;Acc:12931]                                                     |
| 1842 | ENSG00000092067 | 804.308173  | -1.348660297 | 0.154283464 | 2.34E-17 | CEBPE      | CCAAT/enhancer binding protein (C/EBP), epsilon [Source:HGNC Symbol;Acc:1836]                              |



|      |                 |             |              |             |          |                |                                                                                                       |
|------|-----------------|-------------|--------------|-------------|----------|----------------|-------------------------------------------------------------------------------------------------------|
| 1843 | ENSG00000161911 | 97.50493555 | 3.078188796  | 0.352141665 | 2.34E-17 | TREML1         | triggering receptor expressed on myeloid cells-like 1 [Source:HGNC Symbol;Acc:20434]                  |
| 1844 | ENSG00000205726 | 213.3136279 | -1.896164624 | 0.216992851 | 2.40E-17 | ITSN1          | intersectin 1 (SH3 domain protein) [Source:HGNC Symbol;Acc:6183]                                      |
| 1845 | ENSG00000100605 | 2600.718948 | 0.776025706  | 0.088809712 | 2.41E-17 | ITPK1          | inositol-tetrakisphosphate 1-kinase [Source:HGNC Symbol;Acc:6177]                                     |
| 1846 | ENSG00000141298 | 7772.426819 | 0.541882259  | 0.062016335 | 2.41E-17 | SSH2           | slingshot protein phosphatase 2 [Source:HGNC Symbol;Acc:30580]                                        |
| 1847 | ENSG00000143862 | 1414.132566 | -0.817827801 | 0.093657008 | 2.53E-17 | ARL8A          | ADP-ribosylation factor-like 8A [Source:HGNC Symbol;Acc:25192]                                        |
| 1848 | ENSG00000182022 | 4108.8445   | 0.593907736  | 0.068022313 | 2.55E-17 | CHST15         | carbohydrate (N-acetylgalactosamine 4-sulfate 6-O) sulfotransferase 15 [Source:HGNC Symbol;Acc:18137] |
| 1849 | ENSG00000048028 | 763.7068087 | 1.288531748  | 0.147728981 | 2.76E-17 | USP28          | ubiquitin specific peptidase 28 [Source:HGNC Symbol;Acc:12625]                                        |
| 1850 | ENSG00000131051 | 10404.86937 | 0.529935549  | 0.060760764 | 2.77E-17 | RBM39          | RNA binding motif protein 39 [Source:HGNC Symbol;Acc:15923]                                           |
| 1851 | ENSG00000229828 | 92.61483834 | 3.097643394  | 0.355372197 | 2.90E-17 | RP11-94I2.1    |                                                                                                       |
| 1852 | ENSG00000115419 | 2653.281756 | 0.659239517  | 0.07563138  | 2.90E-17 | GLS            | glutaminase [Source:HGNC Symbol;Acc:4331]                                                             |
| 1853 | ENSG00000136040 | 5733.340503 | -0.582752952 | 0.066882079 | 2.99E-17 | PLXNC1         | plexin C1 [Source:HGNC Symbol;Acc:9106]                                                               |
| 1854 | ENSG00000047410 | 4068.97752  | 0.6713222    | 0.077062129 | 3.03E-17 | TPR            | translocated promoter region, nuclear basket protein [Source:HGNC Symbol;Acc:12017]                   |
| 1855 | ENSG00000186407 | 667.1227534 | 1.153841662  | 0.132472237 | 3.06E-17 | CD300E         | CD300e molecule [Source:HGNC Symbol;Acc:28874]                                                        |
| 1856 | ENSG00000176435 | 49.7397672  | 4.205201118  | 0.482815261 | 3.07E-17 | CLEC14A        | C-type lectin domain family 14, member A [Source:HGNC Symbol;Acc:19832]                               |
| 1857 | ENSG00000115295 | 349.5389058 | 2.063239193  | 0.237090477 | 3.28E-17 | CLIP4          | CAP-GLY domain containing linker protein family, member 4 [Source:HGNC Symbol;Acc:26108]              |
| 1858 | ENSG00000154127 | 1426.573221 | 0.807586714  | 0.092882033 | 3.50E-17 | UBASH3B        | ubiquitin associated and SH3 domain containing B [Source:HGNC Symbol;Acc:29884]                       |
| 1859 | ENSG00000128815 | 3270.28309  | -0.605636953 | 0.069676462 | 3.58E-17 | WDFY4          | WDFY family member 4 [Source:HGNC Symbol;Acc:29323]                                                   |
| 1860 | ENSG00000152219 | 395.277685  | 1.53392365   | 0.176519187 | 3.65E-17 | ARL14EP        | ADP-ribosylation factor-like 14 effector protein [Source:HGNC Symbol;Acc:26798]                       |
| 1861 | ENSG00000239887 | 291.8401587 | -1.646869199 | 0.189585339 | 3.75E-17 | C1orf226       | chromosome 1 open reading frame 226 [Source:HGNC Symbol;Acc:34351]                                    |
| 1862 | ENSG00000118508 | 939.1847014 | -0.942140352 | 0.10857357  | 4.07E-17 | RAB32          | RAB32, member RAS oncogene family [Source:HGNC Symbol;Acc:9772]                                       |
| 1863 | ENSG00000005238 | 3395.559736 | -0.563348707 | 0.064936964 | 4.14E-17 | FAM214B        | family with sequence similarity 214, member B [Source:HGNC Symbol;Acc:25666]                          |
| 1864 | ENSG00000130038 | 970.7504215 | -0.932171175 | 0.107452956 | 4.15E-17 | EFCAB4B        | EF-hand calcium binding domain 4B [Source:HGNC Symbol;Acc:28657]                                      |
| 1865 | ENSG00000188921 | 4317.043702 | -0.636909955 | 0.073421925 | 4.16E-17 | PTPLAD2        | protein tyrosine phosphatase-like A domain containing 2 [Source:HGNC Symbol;Acc:20920]                |
| 1866 | ENSG00000136541 | 375.1585968 | 1.529889727  | 0.176375945 | 4.18E-17 | ERMN           | ermin, ERM-like protein [Source:HGNC Symbol;Acc:29208]                                                |
| 1867 | ENSG00000185885 | 4161.555453 | 1.586721065  | 0.183146265 | 4.58E-17 | IFITM1         | interferon induced transmembrane protein 1 [Source:HGNC Symbol;Acc:5412]                              |
| 1868 | ENSG00000033867 | 580.4773404 | 1.483985758  | 0.171321275 | 4.64E-17 | SLC4A7         | solute carrier family 4, sodium bicarbonate cotransporter, member 7 [Source:HGNC Symbol;Acc:11033]    |
| 1869 | ENSG00000255098 | 255.6549715 | -1.74021429  | 0.200925063 | 4.68E-17 | RP11-481A20.11 | Protein LOC101060662 [Source:UniProtKB/TrEMBL;Acc:E9PP17]                                             |
| 1870 | ENSG00000178764 | 878.0118932 | 0.977599629  | 0.1129481   | 4.92E-17 | ZHX2           | zinc fingers and homeoboxes 2 [Source:HGNC Symbol;Acc:18513]                                          |

|      |                 |             |              |             |          |          |                                                                                                                       |
|------|-----------------|-------------|--------------|-------------|----------|----------|-----------------------------------------------------------------------------------------------------------------------|
| 1871 | ENSG00000108106 | 296.9808412 | -1.816867053 | 0.209936631 | 4.96E-17 | UBE2S    | ubiquitin-conjugating enzyme E2S [Source:HGNC Symbol;Acc:17895]                                                       |
| 1872 | ENSG00000177879 | 1950.762107 | -0.786930371 | 0.090936817 | 4.99E-17 | AP3S1    | adaptor-related protein complex 3, sigma 1 subunit [Source:HGNC Symbol;Acc:2013]                                      |
| 1873 | ENSG00000090889 | 147.9112322 | -2.213428243 | 0.255876009 | 5.13E-17 | KIF4A    | kinesin family member 4A [Source:HGNC Symbol;Acc:13339]                                                               |
| 1874 | ENSG00000154997 | 618.6511495 | -1.145926992 | 0.132505156 | 5.23E-17 | SEPT14   | septin 14 [Source:HGNC Symbol;Acc:33280]                                                                              |
| 1875 | ENSG00000003402 | 20671.99001 | -0.38442937  | 0.044461244 | 5.31E-17 | CFLAR    | CASP8 and FADD-like apoptosis regulator [Source:HGNC Symbol;Acc:1876]                                                 |
| 1876 | ENSG00000151208 | 221.3759682 | 1.987190177  | 0.229847755 | 5.33E-17 | DLG5     | discs, large homolog 5 (Drosophila) [Source:HGNC Symbol;Acc:2904]                                                     |
| 1877 | ENSG00000114374 | 1085.856596 | 1.153612839  | 0.133432863 | 5.33E-17 | USP9Y    | ubiquitin specific peptidase 9, Y-linked [Source:HGNC Symbol;Acc:12633]                                               |
| 1878 | ENSG00000051180 | 197.0321525 | -2.127941838 | 0.246136426 | 5.34E-17 | RAD51    | RAD51 recombinase [Source:HGNC Symbol;Acc:9817]                                                                       |
| 1879 | ENSG00000139211 | 162.3994851 | 2.303317147  | 0.26643315  | 5.36E-17 | AMIGO2   | adhesion molecule with Ig-like domain 2 [Source:HGNC Symbol;Acc:24073]                                                |
| 1880 | ENSG00000165178 | 5322.806129 | -0.644512991 | 0.074567897 | 5.44E-17 | NCF1C    | neutrophil cytosolic factor 1C pseudogene [Source:HGNC Symbol;Acc:32523]                                              |
| 1881 | ENSG00000066926 | 485.1775052 | -1.479201996 | 0.171153735 | 5.47E-17 | FECH     | ferrochelatase [Source:HGNC Symbol;Acc:3647]                                                                          |
| 1882 | ENSG00000227242 | 104.255954  | 2.985366446  | 0.345531663 | 5.59E-17 | NBPF13P  | neuroblastoma breakpoint family, member 13, pseudogene [Source:HGNC Symbol;Acc:31995]                                 |
| 1883 | ENSG00000107819 | 654.8345483 | 1.262351643  | 0.146180389 | 5.81E-17 | SFXN3    | sideroflexin 3 [Source:HGNC Symbol;Acc:16087]                                                                         |
| 1884 | ENSG00000010327 | 490.8501259 | 1.327638771  | 0.153780738 | 5.92E-17 | STAB1    | stabilin 1 [Source:HGNC Symbol;Acc:18628]                                                                             |
| 1885 | ENSG00000087589 | 695.3872819 | 1.222468488  | 0.141626292 | 6.00E-17 | CASS4    | Cas scaffolding protein family member 4 [Source:HGNC Symbol;Acc:15878]                                                |
| 1886 | ENSG00000135185 | 376.6628414 | 1.465649731  | 0.169824558 | 6.07E-17 | TMEM243  | transmembrane protein 243, mitochondrial [Source:HGNC Symbol;Acc:21707]                                               |
| 1887 | ENSG00000130338 | 250.1736442 | 1.812734541  | 0.210141292 | 6.29E-17 | TULP4    | tubby like protein 4 [Source:HGNC Symbol;Acc:15530]                                                                   |
| 1888 | ENSG00000169756 | 1506.987805 | -0.792619517 | 0.091902023 | 6.37E-17 | LIMS1    | LIM and senescent cell antigen-like domains 1 [Source:HGNC Symbol;Acc:6616]                                           |
| 1889 | ENSG00000154217 | 826.4728825 | 1.05926372   | 0.122852293 | 6.50E-17 | PITPNC1  | phosphatidylinositol transfer protein, cytoplasmic 1 [Source:HGNC Symbol;Acc:21045]                                   |
| 1890 | ENSG00000198858 | 6366.500123 | 0.70812867   | 0.082128463 | 6.50E-17 | R3HDM4   | R3H domain containing 4 [Source:HGNC Symbol;Acc:28270]                                                                |
| 1891 | ENSG00000014216 | 3418.582611 | -0.709287384 | 0.082277152 | 6.58E-17 | CAPN1    | calpain 1, (mu/l) large subunit [Source:HGNC Symbol;Acc:1476]                                                         |
| 1892 | ENSG00000101146 | 1039.096959 | -0.889955556 | 0.103235176 | 6.58E-17 | RAE1     | ribonucleic acid export 1 [Source:HGNC Symbol;Acc:9828]                                                               |
| 1893 | ENSG00000109956 | 220.2485083 | 1.995476336  | 0.231535624 | 6.71E-17 | B3GAT1   | beta-1,3-glucuronyltransferase 1 (glucuronosyltransferase P) [Source:HGNC Symbol;Acc:921]                             |
| 1894 | ENSG00000143702 | 1670.218587 | -0.797588273 | 0.092576705 | 6.88E-17 | CEP170   | centrosomal protein 170kDa [Source:HGNC Symbol;Acc:28920]                                                             |
| 1895 | ENSG00000100644 | 3620.031466 | -0.65658554  | 0.076233059 | 7.03E-17 | HIF1A    | hypoxia inducible factor 1, alpha subunit (basic helix-loop-helix transcription factor) [Source:HGNC Symbol;Acc:4910] |
| 1896 | ENSG00000214176 | 3495.590355 | -0.646328696 | 0.07504285  | 7.03E-17 | PLEKHM1P | pleckstrin homology domain containing, family M (with RUN domain) member 1 pseudogene [Source:HGNC Symbol;Acc:35411]  |
| 1897 | ENSG00000262742 | 724.4015877 | -1.046295481 | 0.121481931 | 7.03E-17 | MCTP1    | multiple C2 domains, transmembrane 1 [Source:HGNC Symbol;Acc:26183]                                                   |
| 1898 | ENSG00000090487 | 3760.819554 | -0.552337408 | 0.064130441 | 7.03E-17 | SPG21    | spastic paraplegia 21 (autosomal recessive, Mast syndrome) [Source:HGNC Symbol;Acc:20373]                             |

|      |                 |             |              |             |          |                |                                                                                                           |
|------|-----------------|-------------|--------------|-------------|----------|----------------|-----------------------------------------------------------------------------------------------------------|
| 1899 | ENSG00000069329 | 2490.008692 | -0.829515453 | 0.096368124 | 7.34E-17 | VPS35          | vacuolar protein sorting 35 homolog ( <i>S. cerevisiae</i> ) [Source:HGNC Symbol;Acc:13487]               |
| 1900 | ENSG00000118513 | 2083.837161 | -0.66946357  | 0.077779133 | 7.37E-17 | MYB            | v-myb avian myeloblastosis viral oncogene homolog [Source:HGNC Symbol;Acc:7545]                           |
| 1901 | ENSG00000176595 | 1099.163711 | -0.892464223 | 0.103701646 | 7.44E-17 | KBTBD11        | kelch repeat and BTB (POZ) domain containing 11 [Source:HGNC Symbol;Acc:29104]                            |
| 1902 | ENSG00000176208 | 445.8527515 | -1.305160897 | 0.151676566 | 7.52E-17 | ATAD5          | ATPase family, AAA domain containing 5 [Source:HGNC Symbol;Acc:25752]                                     |
| 1903 | ENSG00000119729 | 2455.318707 | 0.711623535  | 0.082715557 | 7.62E-17 | RHOQ           | ras homolog family member Q [Source:HGNC Symbol;Acc:17736]                                                |
| 1904 | ENSG00000259040 | 51.80346332 | -4.242725    | 0.493178308 | 7.64E-17 | BLOC1S5-TXNDC5 | BLOC1S5-TXNDC5 readthrough (NMD candidate) [Source:HGNC Symbol;Acc:42001]                                 |
| 1905 | ENSG00000130584 | 191.8858765 | 2.065261354  | 0.240098286 | 7.71E-17 | ZBTB46         | zinc finger and BTB domain containing 46 [Source:HGNC Symbol;Acc:16094]                                   |
| 1906 | ENSG00000162174 | 382.494584  | -1.509122606 | 0.175606591 | 8.26E-17 | ASRGL1         | asparaginase like 1 [Source:HGNC Symbol;Acc:16448]                                                        |
| 1907 | ENSG00000143228 | 224.9823738 | -1.868064055 | 0.217413353 | 8.37E-17 | NUF2           | NUF2, NDC80 kinetochore complex component [Source:HGNC Symbol;Acc:14621]                                  |
| 1908 | ENSG00000161381 | 360.2297646 | 1.554416437  | 0.180918169 | 8.40E-17 | PLXDC1         | plexin domain containing 1 [Source:HGNC Symbol;Acc:20945]                                                 |
| 1909 | ENSG00000159216 | 1945.186829 | -0.740033851 | 0.086149037 | 8.51E-17 | RUNX1          | runt-related transcription factor 1 [Source:HGNC Symbol;Acc:10471]                                        |
| 1910 | ENSG00000168216 | 1343.122371 | 0.837265925  | 0.097472313 | 8.54E-17 | LMBRD1         | LMBR1 domain containing 1 [Source:HGNC Symbol;Acc:23038]                                                  |
| 1911 | ENSG00000160593 | 30559.67795 | 0.384037298  | 0.044710015 | 8.55E-17 | AMICA1         | adhesion molecule, interacts with CXADR antigen 1 [Source:HGNC Symbol;Acc:19084]                          |
| 1912 | ENSG00000116678 | 210.0681418 | -1.918895399 | 0.223407571 | 8.57E-17 | LEPR           | leptin receptor [Source:HGNC Symbol;Acc:6554]                                                             |
| 1913 | ENSG00000133816 | 2083.000843 | 0.773624995  | 0.090153963 | 9.19E-17 | MICAL2         | microtubule associated monooxygenase, calponin and LIM domain containing 2 [Source:HGNC Symbol;Acc:24693] |
| 1914 | ENSG00000186265 | 242.9566207 | 1.869574396  | 0.217985221 | 9.55E-17 | BTLA           | B and T lymphocyte associated [Source:HGNC Symbol;Acc:21087]                                              |
| 1915 | ENSG00000233327 | 692.0204196 | -1.254767904 | 0.146378169 | 9.93E-17 | USP32P2        | ubiquitin specific peptidase 32 pseudogene 2 [Source:HGNC Symbol;Acc:30751]                               |
| 1916 | ENSG00000206281 | 2980.356823 | 0.707480727  | 0.082539494 | 9.98E-17 | TAPBP          | TAP binding protein (tapasin) [Source:HGNC Symbol;Acc:11566]                                              |
| 1917 | ENSG00000078596 | 461.8995752 | 1.459641325  | 0.170336627 | 1.02E-16 | ITM2A          | integral membrane protein 2A [Source:HGNC Symbol;Acc:6173]                                                |
| 1918 | ENSG00000173039 | 1583.82118  | 0.793696165  | 0.092634382 | 1.03E-16 | RELA           | v-rel avian reticuloendotheliosis viral oncogene homolog A [Source:HGNC Symbol;Acc:9955]                  |
| 1919 | ENSG00000158987 | 1143.442451 | 0.9645858    | 0.112592061 | 1.04E-16 | RAPGEF6        | Rap guanine nucleotide exchange factor (GEF) 6 [Source:HGNC Symbol;Acc:20655]                             |
| 1920 | ENSG00000187605 | 2301.959343 | -0.635683309 | 0.074302984 | 1.15E-16 | TET3           | tet methylcytosine dioxygenase 3 [Source:HGNC Symbol;Acc:28313]                                           |
| 1921 | ENSG00000126262 | 2800.483078 | 0.613201884  | 0.071705731 | 1.18E-16 | FFAR2          | free fatty acid receptor 2 [Source:HGNC Symbol;Acc:4501]                                                  |
| 1922 | ENSG00000250151 | 812.5259898 | -1.000174835 | 0.116999979 | 1.21E-16 | ARPC4-TLL3     | ARPC4-TLL3 readthrough [Source:HGNC Symbol;Acc:38830]                                                     |
| 1923 | ENSG00000161912 | 997.4122356 | -0.962585204 | 0.112638639 | 1.24E-16 | ADCY10P1       | adenylate cyclase 10 (soluble) pseudogene 1 [Source:HGNC Symbol;Acc:44143]                                |
| 1924 | ENSG00000122783 | 1007.188101 | 1.248266939  | 0.146070036 | 1.24E-16 | C7orf49        | chromosome 7 open reading frame 49 [Source:HGNC Symbol;Acc:22432]                                         |
| 1925 | ENSG00000085999 | 205.7478712 | -1.930032799 | 0.225868236 | 1.25E-16 | RAD54L         | RAD54-like ( <i>S. cerevisiae</i> ) [Source:HGNC Symbol;Acc:9826]                                         |
| 1926 | ENSG00000137818 | 9829.943819 | 0.707250588  | 0.082861507 | 1.36E-16 | RPLP1          | ribosomal protein, large, P1 [Source:HGNC Symbol;Acc:10372]                                               |

|      |                 |             |              |             |          |          |                                                                                                 |
|------|-----------------|-------------|--------------|-------------|----------|----------|-------------------------------------------------------------------------------------------------|
| 1927 | ENSG00000124224 | 740.8767694 | -1.031566327 | 0.120881181 | 1.38E-16 | PPP4R1L  | protein phosphatase 4, regulatory subunit 1-like [Source:HGNC Symbol;Acc:15755]                 |
| 1928 | ENSG00000140396 | 2841.46075  | -0.618394168 | 0.072490741 | 1.41E-16 | NCOA2    | nuclear receptor coactivator 2 [Source:HGNC Symbol;Acc:7669]                                    |
| 1929 | ENSG00000148672 | 1376.437955 | 0.871264532  | 0.102133486 | 1.41E-16 | GLUD1    | glutamate dehydrogenase 1 [Source:HGNC Symbol;Acc:4335]                                         |
| 1930 | ENSG00000108960 | 281.8158168 | 1.68948409   | 0.198131383 | 1.46E-16 | MMD      | monocyte to macrophage differentiation-associated [Source:HGNC Symbol;Acc:7153]                 |
| 1931 | ENSG00000163840 | 1882.036068 | 0.755757579  | 0.08863435  | 1.46E-16 | DTX3L    | deltex 3-like (Drosophila) [Source:HGNC Symbol;Acc:30323]                                       |
| 1932 | ENSG00000157693 | 422.3526464 | 1.590402652  | 0.18670602  | 1.57E-16 | C9orf91  | chromosome 9 open reading frame 91 [Source:HGNC Symbol;Acc:24513]                               |
| 1933 | ENSG00000116871 | 3065.716103 | 0.69706843   | 0.081833166 | 1.57E-16 | MAP7D1   | MAP7 domain containing 1 [Source:HGNC Symbol;Acc:25514]                                         |
| 1934 | ENSG00000142405 | 2496.801212 | -0.643371427 | 0.075591709 | 1.67E-16 | NLRP12   | NLR family, pyrin domain containing 12 [Source:HGNC Symbol;Acc:22938]                           |
| 1935 | ENSG00000107745 | 1544.153972 | -0.806066367 | 0.094736841 | 1.70E-16 | MICU1    | mitochondrial calcium uptake 1 [Source:HGNC Symbol;Acc:1530]                                    |
| 1936 | ENSG00000234769 | 2580.863254 | -0.769408845 | 0.090471198 | 1.76E-16 | WASH4P   | WAS protein family homolog 4 pseudogene [Source:HGNC Symbol;Acc:14126]                          |
| 1937 | ENSG00000146094 | 7553.558008 | -0.500574466 | 0.058873865 | 1.79E-16 | DOK3     | docking protein 3 [Source:HGNC Symbol;Acc:24583]                                                |
| 1938 | ENSG00000101421 | 3141.536228 | -0.576769346 | 0.0679302   | 1.98E-16 | CHMP4B   | charged multivesicular body protein 4B [Source:HGNC Symbol;Acc:16171]                           |
| 1939 | ENSG00000067057 | 422.1228759 | 1.523695801  | 0.17948252  | 2.00E-16 | PFKP     | phosphofructokinase, platelet [Source:HGNC Symbol;Acc:8878]                                     |
| 1940 | ENSG00000262785 | 36.94975788 | -4.485886631 | 0.528596017 | 2.06E-16 | PKLR     | pyruvate kinase, liver and RBC [Source:HGNC Symbol;Acc:9020]                                    |
| 1941 | ENSG00000140350 | 9067.847554 | -0.454342304 | 0.053576398 | 2.17E-16 | ANP32A   | acidic (leucine-rich) nuclear phosphoprotein 32 family, member A [Source:HGNC Symbol;Acc:13233] |
| 1942 | ENSG00000143627 | 36.80601738 | -4.48011211  | 0.528753762 | 2.31E-16 | PKLR     | pyruvate kinase, liver and RBC [Source:HGNC Symbol;Acc:9020]                                    |
| 1943 | ENSG00000105383 | 1747.705968 | -0.877655502 | 0.103636493 | 2.39E-16 | CD33     | CD33 molecule [Source:HGNC Symbol;Acc:1659]                                                     |
| 1944 | ENSG00000254415 | 2870.945451 | -0.594181259 | 0.070169316 | 2.41E-16 | SIGLEC14 | sialic acid binding Ig-like lectin 14 [Source:HGNC Symbol;Acc:32926]                            |
| 1945 | ENSG00000136929 | 306.8578396 | -1.541783528 | 0.182433051 | 2.77E-16 | HEMGN    | hemogen [Source:HGNC Symbol;Acc:17509]                                                          |
| 1946 | ENSG00000175063 | 336.5522469 | -1.555463009 | 0.184162533 | 2.90E-16 | UBE2C    | ubiquitin-conjugating enzyme E2C [Source:HGNC Symbol;Acc:15937]                                 |
| 1947 | ENSG00000198840 | 20906.053   | 0.434894647  | 0.051500335 | 2.93E-16 | MT-ND3   | mitochondrially encoded NADH dehydrogenase 3 [Source:HGNC Symbol;Acc:7458]                      |
| 1948 | ENSG00000204839 | 907.7392748 | -1.484097504 | 0.175774001 | 2.97E-16 | MROH6    | maestro heat-like repeat family member 6 [Source:HGNC Symbol;Acc:27814]                         |
| 1949 | ENSG00000260353 | 32.39032701 | 4.58356542   | 0.542881216 | 2.97E-16 | PGBD4P1  | piggyBac transposable element derived 4 pseudogene 1 [Source:HGNC Symbol;Acc:44066]             |
| 1950 | ENSG00000115457 | 117.8883382 | -2.544172983 | 0.301417754 | 3.03E-16 | IGFBP2   | insulin-like growth factor binding protein 2, 36kDa [Source:HGNC Symbol;Acc:5471]               |
| 1951 | ENSG00000140332 | 3048.030038 | 0.732547641  | 0.086792917 | 3.04E-16 | TLE3     | transducin-like enhancer of split 3 (E(sp1) homolog, Drosophila) [Source:HGNC Symbol;Acc:11839] |
| 1952 | ENSG00000128872 | 2417.290455 | -0.744391789 | 0.08822627  | 3.11E-16 | TMOD2    | tropomodulin 2 (neuronal) [Source:HGNC Symbol;Acc:11872]                                        |
| 1953 | ENSG00000115415 | 3547.054207 | 0.638144202  | 0.07570698  | 3.34E-16 | STAT1    | signal transducer and activator of transcription 1, 91kDa [Source:HGNC Symbol;Acc:11362]        |
| 1954 | ENSG00000118263 | 3664.162057 | -0.573055035 | 0.067990432 | 3.35E-16 | KLF7     | Kruppel-like factor 7 (ubiquitous) [Source:HGNC Symbol;Acc:6350]                                |

|      |                 |             |              |             |          |         |                                                                                 |
|------|-----------------|-------------|--------------|-------------|----------|---------|---------------------------------------------------------------------------------|
| 1955 | ENSG00000119408 | 701.6174074 | -1.141559411 | 0.135449792 | 3.37E-16 | NEK6    | NIMA-related kinase 6 [Source:HGNC Symbol;Acc:7749]                             |
| 1956 | ENSG00000197701 | 229.2071582 | -1.744554562 | 0.207077713 | 3.46E-16 | ZNF595  | zinc finger protein 595 [Source:HGNC Symbol;Acc:27196]                          |
| 1957 | ENSG00000227671 | 2555.856399 | -0.642262237 | 0.076242464 | 3.48E-16 | MIR3916 | microRNA 3916 [Source:HGNC Symbol;Acc:38912]                                    |
| 1958 | ENSG00000134256 | 501.3741133 | -1.282731524 | 0.152317527 | 3.55E-16 | CD101   | CD101 molecule [Source:HGNC Symbol;Acc:5949]                                    |
| 1959 | ENSG00000153310 | 7599.260192 | -0.517506951 | 0.061498283 | 3.75E-16 | FAM49B  | family with sequence similarity 49, member B [Source:HGNC Symbol;Acc:25216]     |
| 1960 | ENSG00000165512 | 585.3765063 | 1.166625332  | 0.13872091  | 3.92E-16 | ZNF22   | zinc finger protein 22 [Source:HGNC Symbol;Acc:13012]                           |
| 1961 | ENSG00000269087 | 393.5052193 | -1.441927722 | 0.171511108 | 4.01E-16 | G6PD    | glucose-6-phosphate dehydrogenase [Source:HGNC Symbol;Acc:4057]                 |
| 1962 | ENSG00000198925 | 1893.229508 | -0.706261201 | 0.084025663 | 4.07E-16 | ATG9A   | autophagy related 9A [Source:HGNC Symbol;Acc:22408]                             |
| 1963 | ENSG00000173208 | 134.0405335 | 2.602084383  | 0.309736547 | 4.22E-16 | ABCD2   | ATP-binding cassette, sub-family D (ALD), member 2 [Source:HGNC Symbol;Acc:66]  |
| 1964 | ENSG00000100749 | 599.7111956 | -1.137120356 | 0.13536132  | 4.23E-16 | VRK1    | vaccinia related kinase 1 [Source:HGNC Symbol;Acc:12718]                        |
| 1965 | ENSG00000198952 | 3160.015783 | -0.656646514 | 0.078181322 | 4.29E-16 | SMG5    | SMG5 nonsense mediated mRNA decay factor [Source:HGNC Symbol;Acc:24644]         |
| 1966 | ENSG00000075568 | 1882.050355 | -0.742710616 | 0.088449601 | 4.36E-16 | TMEM131 | transmembrane protein 131 [Source:HGNC Symbol;Acc:30366]                        |
| 1967 | ENSG00000105122 | 3747.665207 | -0.673861399 | 0.080259157 | 4.39E-16 | RASAL3  | RAS protein activator like 3 [Source:HGNC Symbol;Acc:26129]                     |
| 1968 | ENSG00000126001 | 1286.786106 | -0.84043148  | 0.100170271 | 4.62E-16 | CEP250  | centrosomal protein 250kDa [Source:HGNC Symbol;Acc:1859]                        |
| 1969 | ENSG00000091651 | 315.9585865 | -1.498785891 | 0.178652287 | 4.64E-16 | ORC6    | origin recognition complex, subunit 6 [Source:HGNC Symbol;Acc:17151]            |
| 1970 | ENSG00000076770 | 793.9470872 | 1.085859614  | 0.129526516 | 4.89E-16 | MBNL3   | muscleblind-like splicing regulator 3 [Source:HGNC Symbol;Acc:20564]            |
| 1971 | ENSG00000117519 | 96.16628431 | 3.300947535  | 0.39401197  | 5.12E-16 | CNN3    | calponin 3, acidic [Source:HGNC Symbol;Acc:2157]                                |
| 1972 | ENSG00000168906 | 5740.52668  | -0.58725733  | 0.070130741 | 5.30E-16 | MAT2A   | methionine adenosyltransferase II, alpha [Source:HGNC Symbol;Acc:6904]          |
| 1973 | ENSG00000147162 | 25932.75585 | -0.390011598 | 0.046582368 | 5.35E-16 | OGT     | O-linked N-acetylglucosamine (GlcNAc) transferase [Source:HGNC Symbol;Acc:8127] |
| 1974 | ENSG00000072401 | 1943.984579 | 0.739979254  | 0.088405225 | 5.45E-16 | UBE2D1  | ubiquitin-conjugating enzyme E2D 1 [Source:HGNC Symbol;Acc:12474]               |
| 1975 | ENSG00000198301 | 543.3179021 | 1.226009637  | 0.14648986  | 5.49E-16 | SDAD1   | SDA1 domain containing 1 [Source:HGNC Symbol;Acc:25537]                         |
| 1976 | ENSG00000233450 | 175.3185834 | -2.041938742 | 0.244029176 | 5.57E-16 | KIFC1   | kinesin family member C1 [Source:HGNC Symbol;Acc:6389]                          |
| 1977 | ENSG00000183307 | 283.0538544 | 1.735327347  | 0.207474325 | 5.74E-16 | CECR6   | cat eye syndrome chromosome region, candidate 6 [Source:HGNC Symbol;Acc:1844]   |
| 1978 | ENSG00000170802 | 2022.781952 | -0.681634817 | 0.081523278 | 5.87E-16 | FOXN2   | forkhead box N2 [Source:HGNC Symbol;Acc:5281]                                   |
| 1979 | ENSG00000113763 | 99.12219447 | -2.7759135   | 0.332034357 | 5.91E-16 | UNC5A   | unc-5 homolog A (C. elegans) [Source:HGNC Symbol;Acc:12567]                     |
| 1980 | ENSG00000143819 | 591.2349143 | -1.178787788 | 0.141000527 | 5.92E-16 | EPHX1   | epoxide hydrolase 1, microsomal (xenobiotic) [Source:HGNC Symbol;Acc:3401]      |
| 1981 | ENSG00000186654 | 253.0004375 | 1.764103434  | 0.211319855 | 6.56E-16 | PRR5    | proline rich 5 (renal) [Source:HGNC Symbol;Acc:31682]                           |
| 1982 | ENSG00000237649 | 175.5143766 | -2.032093582 | 0.24348799  | 6.68E-16 | KIFC1   | kinesin family member C1 [Source:HGNC Symbol;Acc:6389]                          |

|      |                 |             |              |             |          |         |                                                                                            |
|------|-----------------|-------------|--------------|-------------|----------|---------|--------------------------------------------------------------------------------------------|
| 1983 | ENSG00000111642 | 4102.12608  | 0.687742143  | 0.082409599 | 6.70E-16 | CHD4    | chromodomain helicase DNA binding protein 4 [Source:HGNC Symbol;Acc:1919]                  |
| 1984 | ENSG00000166889 | 2649.514799 | -0.625260028 | 0.074930171 | 6.74E-16 | PATL1   | protein associated with topoisomerase II homolog 1 (yeast) [Source:HGNC Symbol;Acc:26721]  |
| 1985 | ENSG00000140398 | 697.0363106 | -1.020173549 | 0.122367097 | 7.18E-16 | NEIL1   | nei endonuclease VIII-like 1 (E. coli) [Source:HGNC Symbol;Acc:18448]                      |
| 1986 | ENSG00000104856 | 345.4182556 | 1.650552607  | 0.198034204 | 7.32E-16 | RELB    | v-rel avian reticuloendotheliosis viral oncogene homolog B [Source:HGNC Symbol;Acc:9956]   |
| 1987 | ENSG00000039068 | 130.0278222 | -2.495357023 | 0.299577215 | 7.64E-16 | CDH1    | cadherin 1, type 1, E-cadherin (epithelial) [Source:HGNC Symbol;Acc:1748]                  |
| 1988 | ENSG00000196562 | 4110.51218  | 0.525802149  | 0.06320323  | 8.33E-16 | SULF2   | sulfatase 2 [Source:HGNC Symbol;Acc:20392]                                                 |
| 1989 | ENSG00000175264 | 66.2287888  | -3.207393462 | 0.385730204 | 8.62E-16 | CHST1   | carbohydrate (keratan sulfate Gal-6) sulfotransferase 1 [Source:HGNC Symbol;Acc:1969]      |
| 1990 | ENSG00000137959 | 803.1840507 | -1.175736303 | 0.141431946 | 8.77E-16 | IFI44L  | interferon-induced protein 44-like [Source:HGNC Symbol;Acc:17817]                          |
| 1991 | ENSG00000062524 | 191.681441  | 2.029142219  | 0.244093575 | 8.77E-16 | LTK     | leukocyte receptor tyrosine kinase [Source:HGNC Symbol;Acc:6721]                           |
| 1992 | ENSG00000054219 | 1849.522781 | 0.711006848  | 0.085534156 | 8.80E-16 | LY75    | lymphocyte antigen 75 [Source:HGNC Symbol;Acc:6729]                                        |
| 1993 | ENSG00000117281 | 160.0631021 | 2.501640117  | 0.301020348 | 8.95E-16 | CD160   | CD160 molecule [Source:HGNC Symbol;Acc:17013]                                              |
| 1994 | ENSG00000176903 | 301.4174097 | 1.567020805  | 0.188633412 | 9.19E-16 | PNMA1   | paraneoplastic Ma antigen 1 [Source:HGNC Symbol;Acc:9158]                                  |
| 1995 | ENSG00000075240 | 613.009551  | -1.259620952 | 0.151687301 | 9.44E-16 | GRAMD4  | GRAM domain containing 4 [Source:HGNC Symbol;Acc:29113]                                    |
| 1996 | ENSG00000089486 | 601.9817208 | 1.200017171  | 0.144510507 | 9.44E-16 | CDIP1   | cell death-inducing p53 target 1 [Source:HGNC Symbol;Acc:13234]                            |
| 1997 | ENSG00000139266 | 319.860229  | 1.535206925  | 0.184953395 | 9.71E-16 | MARCH9  | membrane-associated ring finger (C3HC4) 9 [Source:HGNC Symbol;Acc:25139]                   |
| 1998 | ENSG00000163964 | 1144.549108 | 0.869961282  | 0.104878444 | 1.02E-15 | PIGX    | phosphatidylinositol glycan anchor biosynthesis, class X [Source:HGNC Symbol;Acc:26046]    |
| 1999 | ENSG00000100060 | 1791.670275 | 0.704593728  | 0.084943135 | 1.02E-15 | MFNG    | MFNG O-fucosylpeptide 3-beta-N-acetylglucosaminyltransferase [Source:HGNC Symbol;Acc:7038] |
| 2000 | ENSG00000153944 | 1477.035065 | 0.835757112  | 0.100877549 | 1.11E-15 | MSI2    | musashi RNA-binding protein 2 [Source:HGNC Symbol;Acc:18585]                               |
| 2001 | ENSG00000013016 | 163.427905  | 2.13590163   | 0.257828467 | 1.11E-15 | EHD3    | EH-domain containing 3 [Source:HGNC Symbol;Acc:3244]                                       |
| 2002 | ENSG00000151690 | 354.8771799 | 1.563790236  | 0.188782378 | 1.12E-15 | MFSD6   | major facilitator superfamily domain containing 6 [Source:HGNC Symbol;Acc:24711]           |
| 2003 | ENSG00000116754 | 7476.708403 | 0.438815193  | 0.052975573 | 1.12E-15 | SRSF11  | serine/arginine-rich splicing factor 11 [Source:HGNC Symbol;Acc:10782]                     |
| 2004 | ENSG00000105643 | 1577.930297 | 0.788635508  | 0.095256995 | 1.16E-15 | ARRDC2  | arrestin domain containing 2 [Source:HGNC Symbol;Acc:25225]                                |
| 2005 | ENSG00000168229 | 234.4429549 | 1.987251715  | 0.240042674 | 1.16E-15 | PTGDR   | prostaglandin D2 receptor (DP) [Source:HGNC Symbol;Acc:9591]                               |
| 2006 | ENSG00000123992 | 448.48407   | 1.380194155  | 0.16680918  | 1.21E-15 | DNPEP   | aspartyl aminopeptidase [Source:HGNC Symbol;Acc:2981]                                      |
| 2007 | ENSG00000182541 | 2924.836235 | 0.644132104  | 0.077851751 | 1.21E-15 | LIMK2   | LIM domain kinase 2 [Source:HGNC Symbol;Acc:6614]                                          |
| 2008 | ENSG00000154153 | 163.0829233 | 2.300768458  | 0.278082788 | 1.21E-15 | FAM134B | family with sequence similarity 134, member B [Source:HGNC Symbol;Acc:25964]               |
| 2009 | ENSG00000068724 | 1091.287127 | 0.94410848   | 0.114138441 | 1.23E-15 | TTC7A   | tetratricopeptide repeat domain 7A [Source:HGNC Symbol;Acc:19750]                          |
| 2010 | ENSG00000197872 | 2104.08067  | 0.720391111  | 0.087129161 | 1.27E-15 | FAM49A  | family with sequence similarity 49, member A [Source:HGNC Symbol;Acc:25373]                |

|      |                 |             |              |             |          |          |                                                                                                                 |
|------|-----------------|-------------|--------------|-------------|----------|----------|-----------------------------------------------------------------------------------------------------------------|
| 2011 | ENSG00000178607 | 1804.486496 | 0.719970794  | 0.087102725 | 1.29E-15 | ERN1     | endoplasmic reticulum to nucleus signaling 1 [Source:HGNC Symbol;Acc:3449]                                      |
| 2012 | ENSG00000102786 | 1162.14156  | -0.885386165 | 0.107140368 | 1.31E-15 | INTS6    | integrator complex subunit 6 [Source:HGNC Symbol;Acc:14879]                                                     |
| 2013 | ENSG00000084731 | 481.9970458 | -1.406122973 | 0.170241769 | 1.36E-15 | KIF3C    | kinesin family member 3C [Source:HGNC Symbol;Acc:6321]                                                          |
| 2014 | ENSG00000085840 | 201.6745775 | -1.810621087 | 0.219282253 | 1.39E-15 | ORC1     | origin recognition complex, subunit 1 [Source:HGNC Symbol;Acc:8487]                                             |
| 2015 | ENSG00000130827 | 237.6155849 | 1.807360836  | 0.218904422 | 1.39E-15 | PLXNA3   | plexin A3 [Source:HGNC Symbol;Acc:9101]                                                                         |
| 2016 | ENSG00000132467 | 461.2473576 | 1.278741903  | 0.154884154 | 1.40E-15 | UTP3     | UTP3, small subunit (SSU) processome component, homolog ( <i>S. cerevisiae</i> ) [Source:HGNC Symbol;Acc:24477] |
| 2017 | ENSG00000160298 | 406.6296142 | -1.469484449 | 0.177991684 | 1.40E-15 | C21orf58 | chromosome 21 open reading frame 58 [Source:HGNC Symbol;Acc:1300]                                               |
| 2018 | ENSG00000121957 | 846.131911  | -0.974031329 | 0.117996033 | 1.41E-15 | GPSM2    | G-protein signaling modulator 2 [Source:HGNC Symbol;Acc:29501]                                                  |
| 2019 | ENSG00000030356 | 3304.966772 | 0.551370486  | 0.066809749 | 1.43E-15 | M6PR     | mannose-6-phosphate receptor (cation dependent) [Source:HGNC Symbol;Acc:6752]                                   |
| 2020 | ENSG00000112406 | 4265.741149 | 0.538956199  | 0.065306565 | 1.43E-15 | HECA     | headcase homolog ( <i>Drosophila</i> ) [Source:HGNC Symbol;Acc:21041]                                           |
| 2021 | ENSG00000161547 | 6227.737032 | -0.50118002  | 0.060730079 | 1.44E-15 | SRSF2    | serine/arginine-rich splicing factor 2 [Source:HGNC Symbol;Acc:10783]                                           |
| 2022 | ENSG00000132635 | 704.5999299 | 1.152267715  | 0.13964194  | 1.45E-15 | PCED1A   | PC-esterase domain containing 1A [Source:HGNC Symbol;Acc:16212]                                                 |
| 2023 | ENSG00000133424 | 138.5254053 | 2.327961919  | 0.282171229 | 1.46E-15 | LARGE    | like-glycosyltransferase [Source:HGNC Symbol;Acc:6511]                                                          |
| 2024 | ENSG00000196547 | 8748.153478 | -0.610994884 | 0.074074589 | 1.48E-15 | MAN2A2   | mannosidase, alpha, class 2A, member 2 [Source:HGNC Symbol;Acc:6825]                                            |
| 2025 | ENSG00000182952 | 1403.949673 | 0.914389672  | 0.110860753 | 1.49E-15 | HMGNA4   | high mobility group nucleosomal binding domain 4 [Source:HGNC Symbol;Acc:4989]                                  |
| 2026 | ENSG00000256043 | 149.4410291 | 2.225643808  | 0.26984758  | 1.49E-15 | CTSO     | cathepsin O [Source:HGNC Symbol;Acc:2542]                                                                       |
| 2027 | ENSG00000141736 | 221.9701605 | 2.019063508  | 0.244929054 | 1.54E-15 | ERBB2    | v-erb-b2 avian erythroblastic leukemia viral oncogene homolog 2 [Source:HGNC Symbol;Acc:3430]                   |
| 2028 | ENSG00000187922 | 142.555702  | 2.480570711  | 0.300984942 | 1.57E-15 | LCN10    | lipocalin 10 [Source:HGNC Symbol;Acc:20892]                                                                     |
| 2029 | ENSG00000134222 | 743.4327235 | -1.004084638 | 0.121836322 | 1.57E-15 | PSRC1    | proline/serine-rich coiled-coil 1 [Source:HGNC Symbol;Acc:24472]                                                |
| 2030 | ENSG00000263238 | 150.106767  | 2.214310072  | 0.268785749 | 1.61E-15 | CTSO     | cathepsin O [Source:HGNC Symbol;Acc:2542]                                                                       |
| 2031 | ENSG00000241343 | 2197.339558 | 0.656115964  | 0.079672193 | 1.65E-15 | RPL36A   | ribosomal protein L36a [Source:HGNC Symbol;Acc:10359]                                                           |
| 2032 | ENSG00000134369 | 414.6814569 | 1.393435905  | 0.169246906 | 1.68E-15 | NAV1     | neuron navigator 1 [Source:HGNC Symbol;Acc:15989]                                                               |
| 2033 | ENSG00000269315 | 2197.624629 | 0.656313062  | 0.079784885 | 1.78E-15 | RPL36A   | ribosomal protein L36a [Source:HGNC Symbol;Acc:10359]                                                           |
| 2034 | ENSG00000174652 | 3210.026689 | 0.596872062  | 0.072598462 | 1.85E-15 | ZNF266   | zinc finger protein 266 [Source:HGNC Symbol;Acc:13059]                                                          |
| 2035 | ENSG00000085998 | 435.3554806 | 1.314485901  | 0.159914957 | 1.87E-15 | POMGNT1  | protein O-linked mannose N-acetylglucosaminyltransferase 1 (beta 1,2-) [Source:HGNC Symbol;Acc:19139]           |
| 2036 | ENSG00000105953 | 2101.019681 | -0.718814648 | 0.087462283 | 1.89E-15 | OGDH     | oxoglutarate (alpha-ketoglutarate) dehydrogenase (lipoamide) [Source:HGNC Symbol;Acc:8124]                      |
| 2037 | ENSG00000114784 | 1571.4928   | -0.731339592 | 0.088998598 | 1.91E-15 | EIF1B    | eukaryotic translation initiation factor 1B [Source:HGNC Symbol;Acc:30792]                                      |
| 2038 | ENSG00000239521 | 634.9081574 | -1.062284484 | 0.129279117 | 1.92E-15 | GATS     |                                                                                                                 |

|      |                 |             |              |             |          |           |                                                                                                                             |
|------|-----------------|-------------|--------------|-------------|----------|-----------|-----------------------------------------------------------------------------------------------------------------------------|
| 2039 | ENSG00000178913 | 4337.040051 | 0.577037677  | 0.070250665 | 1.96E-15 | TAF7      | TAF7 RNA polymerase II, TATA box binding protein (TBP)-associated factor, 55kDa [Source:HGNC Symbol;Acc:11541]              |
| 2040 | ENSG00000177674 | 4061.75351  | -0.734750885 | 0.089479743 | 2.01E-15 | AGTRAP    | angiotensin II receptor-associated protein [Source:HGNC Symbol;Acc:13539]                                                   |
| 2041 | ENSG00000065621 | 361.9314627 | -1.388881878 | 0.169258095 | 2.10E-15 | GSTO2     | glutathione S-transferase omega 2 [Source:HGNC Symbol;Acc:23064]                                                            |
| 2042 | ENSG00000188559 | 2127.693219 | -0.716328068 | 0.087299551 | 2.11E-15 | RALGAPA2  | Ral GTPase activating protein, alpha subunit 2 (catalytic) [Source:HGNC Symbol;Acc:16207]                                   |
| 2043 | ENSG00000158481 | 129.6391212 | 2.374727163  | 0.289665301 | 2.24E-15 | CD1C      | CD1c molecule [Source:HGNC Symbol;Acc:1636]                                                                                 |
| 2044 | ENSG00000082458 | 189.3980361 | 2.069715189  | 0.252504877 | 2.26E-15 | DLG3      | discs, large homolog 3 (Drosophila) [Source:HGNC Symbol;Acc:2902]                                                           |
| 2045 | ENSG00000134308 | 2189.897006 | 0.729477915  | 0.089109908 | 2.47E-15 | YWHAQ     | tyrosine 3-monooxygenase/tryptophan 5-monooxygenase activation protein, theta [Source:HGNC Symbol;Acc:12854]                |
| 2046 | ENSG00000101695 | 944.4954798 | 1.092997061  | 0.133599269 | 2.57E-15 | RNF125    | ring finger protein 125, E3 ubiquitin protein ligase [Source:HGNC Symbol;Acc:21150]                                         |
| 2047 | ENSG00000162825 | 1836.512317 | 0.750153725  | 0.091719838 | 2.62E-15 | NBPF8     | neuroblastoma breakpoint family, member 8 [Source:HGNC Symbol;Acc:31990]                                                    |
| 2048 | ENSG00000186049 | 95.25018067 | 2.912380586  | 0.356113012 | 2.63E-15 | KRT73     | keratin 73 [Source:HGNC Symbol;Acc:28928]                                                                                   |
| 2049 | ENSG00000130775 | 7503.582209 | 0.432323648  | 0.052868521 | 2.65E-15 | THEMIS2   | thymocyte selection associated family member 2 [Source:HGNC Symbol;Acc:16839]                                               |
| 2050 | ENSG00000206082 | 4736.156881 | -0.635521772 | 0.077733041 | 2.69E-15 | LINC01002 | long intergenic non-protein coding RNA 1002 [Source:HGNC Symbol;Acc:38538]                                                  |
| 2051 | ENSG00000088766 | 620.2207392 | -1.12210688  | 0.13724984  | 2.69E-15 | CRLS1     | cardiolipin synthase 1 [Source:HGNC Symbol;Acc:16148]                                                                       |
| 2052 | ENSG00000169499 | 3288.209162 | -0.539887451 | 0.066078709 | 2.80E-15 | PLEKHA2   | pleckstrin homology domain containing, family A (phosphoinositide binding specific) member 2 [Source:HGNC Symbol;Acc:14336] |
| 2053 | ENSG00000166532 | 920.4871397 | 0.952914625  | 0.116634475 | 2.81E-15 | RIMKLB    | ribosomal modification protein rimK-like family member B [Source:HGNC Symbol;Acc:29228]                                     |
| 2054 | ENSG00000165802 | 241.8319123 | 1.796287045  | 0.220083516 | 3.01E-15 | NSMF      | NMDA receptor synaptonuclear signaling and neuronal migration factor [Source:HGNC Symbol;Acc:29843]                         |
| 2055 | ENSG00000169413 | 892.6637333 | 1.003340498  | 0.122932631 | 3.01E-15 | RNASE6    | ribonuclease, RNase A family, k6 [Source:HGNC Symbol;Acc:10048]                                                             |
| 2056 | ENSG00000089012 | 221.8868306 | 1.865911637  | 0.228647809 | 3.03E-15 | SIRPG     | signal-regulatory protein gamma [Source:HGNC Symbol;Acc:15757]                                                              |
| 2057 | ENSG00000104765 | 4030.176965 | -0.584134464 | 0.071616485 | 3.14E-15 | BNIP3L    | BCL2/adenovirus E1B 19kDa interacting protein 3-like [Source:HGNC Symbol;Acc:1085]                                          |
| 2058 | ENSG00000114126 | 1495.76951  | -0.761439335 | 0.09340492  | 3.25E-15 | TFDP2     | transcription factor Dp-2 (E2F dimerization partner 2) [Source:HGNC Symbol;Acc:11751]                                       |
| 2059 | ENSG00000135083 | 217.0869695 | 1.984022637  | 0.243710209 | 3.57E-15 | CCNJL     | cyclin J-like [Source:HGNC Symbol;Acc:25876]                                                                                |
| 2060 | ENSG00000164691 | 6196.023554 | 0.448820189  | 0.055135465 | 3.58E-15 | TAGAP     | T-cell activation RhoGTPase activating protein [Source:HGNC Symbol;Acc:15669]                                               |
| 2061 | ENSG00000196141 | 239.9567457 | 1.654387904  | 0.203275967 | 3.63E-15 | SPATS2L   | spermatogenesis associated, serine-rich 2-like [Source:HGNC Symbol;Acc:24574]                                               |
| 2062 | ENSG00000162734 | 588.9551539 | 1.141540211  | 0.140267048 | 3.64E-15 | PEA15     | phosphoprotein enriched in astrocytes 15 [Source:HGNC Symbol;Acc:8822]                                                      |
| 2063 | ENSG00000158882 | 462.6153856 | -1.198092635 | 0.147218821 | 3.64E-15 | TOMM40L   | translocase of outer mitochondrial membrane 40 homolog (yeast)-like [Source:HGNC Symbol;Acc:25756]                          |
| 2064 | ENSG00000132356 | 3627.791162 | -0.633738504 | 0.077875236 | 3.65E-15 | PRKAA1    | protein kinase, AMP-activated, alpha 1 catalytic subunit [Source:HGNC Symbol;Acc:9376]                                      |
| 2065 | ENSG00000152291 | 10421.34604 | -0.418307896 | 0.051409896 | 3.68E-15 | TGOLN2    | trans-golgi network protein 2 [Source:HGNC Symbol;Acc:15450]                                                                |
| 2066 | ENSG00000156515 | 2273.264074 | -0.623143181 | 0.076585391 | 3.68E-15 | HK1       | hexokinase 1 [Source:HGNC Symbol;Acc:4922]                                                                                  |



|      |                 |             |              |             |          |               |                                                                                                              |
|------|-----------------|-------------|--------------|-------------|----------|---------------|--------------------------------------------------------------------------------------------------------------|
| 2067 | ENSG00000111665 | 197.481838  | -1.855361412 | 0.228223011 | 3.90E-15 | CDCA3         | cell division cycle associated 3 [Source:HGNC Symbol;Acc:14624]                                              |
| 2068 | ENSG00000175471 | 739.1501222 | -0.989368711 | 0.121726027 | 3.95E-15 | MCTP1         | multiple C2 domains, transmembrane 1 [Source:HGNC Symbol;Acc:26183]                                          |
| 2069 | ENSG00000086015 | 456.6639194 | -1.317458015 | 0.162126873 | 4.01E-15 | MAST2         | microtubule associated serine/threonine kinase 2 [Source:HGNC Symbol;Acc:19035]                              |
| 2070 | ENSG00000122025 | 160.4255064 | 2.138315671  | 0.263177194 | 4.04E-15 | FLT3          | fms-related tyrosine kinase 3 [Source:HGNC Symbol;Acc:3765]                                                  |
| 2071 | ENSG00000146757 | 282.8622624 | 1.664179115  | 0.204930195 | 4.19E-15 | ZNF92         | zinc finger protein 92 [Source:HGNC Symbol;Acc:13168]                                                        |
| 2072 | ENSG00000263647 | 560.8212556 | -1.107551879 | 0.136405324 | 4.23E-15 | RP11-927P21.5 |                                                                                                              |
| 2073 | ENSG00000159733 | 180.5154851 | 2.368253433  | 0.291713848 | 4.26E-15 | ZFYVE28       | zinc finger, FYVE domain containing 28 [Source:HGNC Symbol;Acc:29334]                                        |
| 2074 | ENSG00000119242 | 357.3236494 | 1.432860643  | 0.176569527 | 4.38E-15 | CCDC92        | coiled-coil domain containing 92 [Source:HGNC Symbol;Acc:29563]                                              |
| 2075 | ENSG00000172349 | 8664.826635 | 0.45796035   | 0.056443984 | 4.43E-15 | IL16          | interleukin 16 [Source:HGNC Symbol;Acc:5980]                                                                 |
| 2076 | ENSG00000198846 | 217.6060094 | 1.864282036  | 0.229807898 | 4.48E-15 | TOX           | thymocyte selection-associated high mobility group box [Source:HGNC Symbol;Acc:18988]                        |
| 2077 | ENSG00000268136 | 197.2784308 | -1.852872214 | 0.228418722 | 4.50E-15 | CDCA3         | cell division cycle associated 3 [Source:HGNC Symbol;Acc:14624]                                              |
| 2078 | ENSG00000166326 | 443.8964119 | 1.354504776  | 0.167118149 | 4.75E-15 | TRIM44        | tripartite motif containing 44 [Source:HGNC Symbol;Acc:19016]                                                |
| 2079 | ENSG00000130956 | 164.8314346 | 2.102198699  | 0.259416708 | 4.80E-15 | HABP4         | hyaluronan binding protein 4 [Source:HGNC Symbol;Acc:17062]                                                  |
| 2080 | ENSG00000204160 | 12368.90002 | 0.384534626  | 0.047481598 | 5.00E-15 | ZDHC18        | zinc finger, DHHC-type containing 18 [Source:HGNC Symbol;Acc:20712]                                          |
| 2081 | ENSG00000141576 | 306.8941122 | 1.658795009  | 0.204907263 | 5.14E-15 | RNF157        | ring finger protein 157 [Source:HGNC Symbol;Acc:29402]                                                       |
| 2082 | ENSG00000162496 | 203.8349885 | 1.85669815   | 0.229461536 | 5.30E-15 | DHRS3         | dehydrogenase/reductase (SDR family) member 3 [Source:HGNC Symbol;Acc:17693]                                 |
| 2083 | ENSG00000104093 | 6214.46331  | -0.505147814 | 0.062442557 | 5.37E-15 | DMXL2         | Dmx-like 2 [Source:HGNC Symbol;Acc:2938]                                                                     |
| 2084 | ENSG00000106415 | 1406.803294 | -0.767198234 | 0.0948598   | 5.46E-15 | GLCC1         | glucocorticoid induced transcript 1 [Source:HGNC Symbol;Acc:18713]                                           |
| 2085 | ENSG00000261698 | 1138.015922 | -1.008672013 | 0.124758308 | 5.58E-15 | DGAT1         | diacylglycerol O-acyltransferase 1 [Source:HGNC Symbol;Acc:2843]                                             |
| 2086 | ENSG00000125746 | 946.7361365 | -0.931090257 | 0.115305359 | 6.05E-15 | EML2          | echinoderm microtubule associated protein like 2 [Source:HGNC Symbol;Acc:18035]                              |
| 2087 | ENSG00000187239 | 4883.765207 | 0.487814357  | 0.060427084 | 6.16E-15 | FNBP1         | formin binding protein 1 [Source:HGNC Symbol;Acc:17069]                                                      |
| 2088 | ENSG00000166341 | 134.8266884 | 2.438889612  | 0.302128652 | 6.18E-15 | DCHS1         | dachsous cadherin-related 1 [Source:HGNC Symbol;Acc:13681]                                                   |
| 2089 | ENSG00000138434 | 2672.144235 | -0.693231052 | 0.085880653 | 6.19E-15 | SSFA2         | sperm specific antigen 2 [Source:HGNC Symbol;Acc:11319]                                                      |
| 2090 | ENSG00000126822 | 3982.661177 | 0.53939723   | 0.066853591 | 6.38E-15 | PLEKHG3       | pleckstrin homology domain containing, family G (with RhoGef domain) member 3 [Source:HGNC Symbol;Acc:20364] |
| 2091 | ENSG00000271438 | 392.155165  | 1.462245544  | 0.181332321 | 6.61E-15 | IGHD          | immunoglobulin heavy constant delta [Source:HGNC Symbol;Acc:5480]                                            |
| 2092 | ENSG00000077232 | 1545.462043 | 0.845547765  | 0.104904075 | 6.81E-15 | DNAJC10       | DnaJ (Hsp40) homolog, subfamily C, member 10 [Source:HGNC Symbol;Acc:24637]                                  |
| 2093 | ENSG00000178695 | 2370.286134 | -0.660356479 | 0.08196412  | 7.01E-15 | KCTD12        | potassium channel tetramerization domain containing 12 [Source:HGNC Symbol;Acc:14678]                        |
| 2094 | ENSG00000254979 | 59.61039651 | -3.360903821 | 0.417229562 | 7.09E-15 | RP11-872D17.8 | Uncharacterized protein [Source:UniProtKB/TrEMBL;Acc:H0YCG3]                                                 |

|      |                 |             |              |             |          |               |                                                                                                     |
|------|-----------------|-------------|--------------|-------------|----------|---------------|-----------------------------------------------------------------------------------------------------|
| 2095 | ENSG00000101447 | 108.5600751 | -2.488735295 | 0.309049359 | 7.22E-15 | FAM83D        | family with sequence similarity 83, member D [Source:HGNC Symbol;Acc:16122]                         |
| 2096 | ENSG00000167703 | 2126.939594 | 0.731530658  | 0.090847244 | 7.25E-15 | SLC43A2       | solute carrier family 43 (amino acid system L transporter), member 2 [Source:HGNC Symbol;Acc:23087] |
| 2097 | ENSG00000168939 | 358.0298335 | -1.38072376  | 0.17168571  | 7.88E-15 | SPRY3         | sprouty homolog 3 (Drosophila) [Source:HGNC Symbol;Acc:11271]                                       |
| 2098 | ENSG00000169375 | 1587.358393 | 0.72477614   | 0.090140555 | 7.98E-15 | SIN3A         | SIN3 transcription regulator family member A [Source:HGNC Symbol;Acc:19353]                         |
| 2099 | ENSG00000135048 | 2030.878291 | -0.661802249 | 0.082309238 | 7.98E-15 | TMEM2         | transmembrane protein 2 [Source:HGNC Symbol;Acc:11869]                                              |
| 2100 | ENSG00000160305 | 4522.85456  | -0.510891619 | 0.063558949 | 8.13E-15 | DIP2A         | DIP2 disco-interacting protein 2 homolog A (Drosophila) [Source:HGNC Symbol;Acc:17217]              |
| 2101 | ENSG00000065534 | 388.7942484 | 1.774811912  | 0.220808632 | 8.15E-15 | MYLK          | myosin light chain kinase [Source:HGNC Symbol;Acc:7590]                                             |
| 2102 | ENSG00000182253 | 101.4196055 | 2.718723785  | 0.338250616 | 8.16E-15 | SYNM          | synemin, intermediate filament protein [Source:HGNC Symbol;Acc:24466]                               |
| 2103 | ENSG00000103994 | 4076.771923 | -0.571179442 | 0.071089493 | 8.35E-15 | ZNF106        | zinc finger protein 106 [Source:HGNC Symbol;Acc:12886]                                              |
| 2104 | ENSG00000159111 | 522.9473365 | 1.170751485  | 0.145713923 | 8.35E-15 | MRPL10        | mitochondrial ribosomal protein L10 [Source:HGNC Symbol;Acc:14055]                                  |
| 2105 | ENSG00000179094 | 437.334615  | 1.506201155  | 0.187487655 | 8.41E-15 | PER1          | period circadian clock 1 [Source:HGNC Symbol;Acc:8845]                                              |
| 2106 | ENSG00000079337 | 270.3127239 | 1.549818604  | 0.192958666 | 8.53E-15 | RAPGEF3       | Rap guanine nucleotide exchange factor (GEF) 3 [Source:HGNC Symbol;Acc:16629]                       |
| 2107 | ENSG00000041353 | 188.7368291 | 1.98031025   | 0.246774398 | 9.03E-15 | RAB27B        | RAB27B, member RAS oncogene family [Source:HGNC Symbol;Acc:9767]                                    |
| 2108 | ENSG00000134755 | 202.1110302 | 2.072517773  | 0.258266089 | 9.03E-15 | DSC2          | desmocollin 2 [Source:HGNC Symbol;Acc:3036]                                                         |
| 2109 | ENSG00000074047 | 61.46230993 | 3.526172407  | 0.439437745 | 9.06E-15 | GLI2          | GLI family zinc finger 2 [Source:HGNC Symbol;Acc:4318]                                              |
| 2110 | ENSG00000143337 | 2547.24263  | -0.650930812 | 0.081144014 | 9.23E-15 | TOR1AIP1      | torsin A interacting protein 1 [Source:HGNC Symbol;Acc:29456]                                       |
| 2111 | ENSG00000197653 | 218.9190545 | -1.807281869 | 0.225297817 | 9.24E-15 | DNAH10        | dynein, axonemal, heavy chain 10 [Source:HGNC Symbol;Acc:2941]                                      |
| 2112 | ENSG00000160255 | 26906.09766 | -0.541344492 | 0.067500217 | 9.38E-15 | ITGB2         | integrin, beta 2 (complement component 3 receptor 3 and 4 subunit) [Source:HGNC Symbol;Acc:6155]    |
| 2113 | ENSG00000182230 | 238.8637273 | 1.960766101  | 0.244532621 | 9.49E-15 | FAM153B       | family with sequence similarity 153, member B [Source:HGNC Symbol;Acc:27323]                        |
| 2114 | ENSG00000109458 | 962.2960794 | 1.07253506   | 0.133783002 | 9.59E-15 | GAB1          | GRB2-associated binding protein 1 [Source:HGNC Symbol;Acc:4066]                                     |
| 2115 | ENSG00000136492 | 237.2743278 | -2.024101883 | 0.252520013 | 9.70E-15 | BRIP1         | BRCA1 interacting protein C-terminal helicase 1 [Source:HGNC Symbol;Acc:20473]                      |
| 2116 | ENSG00000080546 | 883.822511  | 0.953421975  | 0.118957629 | 9.76E-15 | SESN1         | sestrin 1 [Source:HGNC Symbol;Acc:21595]                                                            |
| 2117 | ENSG00000244398 | 1474.009686 | 0.869287691  | 0.108478356 | 9.86E-15 | RP11-466H18.1 |                                                                                                     |
| 2118 | ENSG00000156802 | 853.9759489 | -1.006017526 | 0.125556668 | 9.93E-15 | ATAD2         | ATPase family, AAA domain containing 2 [Source:HGNC Symbol;Acc:30123]                               |
| 2119 | ENSG00000129691 | 1262.871813 | -0.773550032 | 0.096564299 | 1.01E-14 | ASH2L         | ash2 (absent, small, or homeotic)-like (Drosophila) [Source:HGNC Symbol;Acc:744]                    |
| 2120 | ENSG00000262683 | 144.9468799 | 2.133869643  | 0.266602407 | 1.06E-14 | FHIT          | fragile histidine triad [Source:HGNC Symbol;Acc:3701]                                               |
| 2121 | ENSG00000130518 | 476.9693393 | 1.366367939  | 0.170810954 | 1.10E-14 | KIAA1683      | KIAA1683 [Source:HGNC Symbol;Acc:29350]                                                             |
| 2122 | ENSG00000185386 | 76.93431439 | 2.956527672  | 0.370138863 | 1.21E-14 | MAPK11        | mitogen-activated protein kinase 11 [Source:HGNC Symbol;Acc:6873]                                   |

|      |                 |             |              |             |          |          |                                                                                                         |
|------|-----------------|-------------|--------------|-------------|----------|----------|---------------------------------------------------------------------------------------------------------|
| 2123 | ENSG00000002726 | 744.9968364 | -1.058794928 | 0.132559397 | 1.22E-14 | AOC1     | amine oxidase, copper containing 1 [Source:HGNC Symbol;Acc:80]                                          |
| 2124 | ENSG00000151502 | 2442.640651 | -0.589429445 | 0.073812874 | 1.23E-14 | VPS26B   | vacuolar protein sorting 26 homolog B ( <i>S. pombe</i> ) [Source:HGNC Symbol;Acc:28119]                |
| 2125 | ENSG00000206435 | 1098.618891 | 1.066852946  | 0.133620619 | 1.25E-14 | HLA-C    | major histocompatibility complex, class I, C [Source:HGNC Symbol;Acc:4933]                              |
| 2126 | ENSG00000109452 | 463.3676638 | 1.614760363  | 0.202261401 | 1.25E-14 | INPP4B   | inositol polyphosphate-4-phosphatase, type II, 105kDa [Source:HGNC Symbol;Acc:6075]                     |
| 2127 | ENSG00000262589 | 831.1750228 | -1.30529182  | 0.16353645  | 1.27E-14 | NSUN5    | NOP2/Sun domain family, member 5 [Source:HGNC Symbol;Acc:16385]                                         |
| 2128 | ENSG00000103226 | 1812.427739 | -0.679518083 | 0.085143399 | 1.28E-14 | NOMO3    | NODAL modulator 3 [Source:HGNC Symbol;Acc:25242]                                                        |
| 2129 | ENSG00000154122 | 777.2065872 | 1.232151093  | 0.154479997 | 1.33E-14 | ANKH     | ANKH inorganic pyrophosphate transport regulator [Source:HGNC Symbol;Acc:15492]                         |
| 2130 | ENSG00000135441 | 2419.506462 | -0.58012647  | 0.072759712 | 1.36E-14 | BLOC1S1  | biogenesis of lysosomal organelles complex-1, subunit 1 [Source:HGNC Symbol;Acc:4200]                   |
| 2131 | ENSG00000132514 | 171.9687241 | 2.081584787  | 0.261127831 | 1.38E-14 | CLEC10A  | C-type lectin domain family 10, member A [Source:HGNC Symbol;Acc:16916]                                 |
| 2132 | ENSG00000108963 | 417.8223359 | 1.252061871  | 0.157112356 | 1.40E-14 | DPH1     | diphthamide biosynthesis 1 [Source:HGNC Symbol;Acc:3003]                                                |
| 2133 | ENSG00000163781 | 2012.945993 | -0.684416886 | 0.085883351 | 1.40E-14 | TOPBP1   | topoisomerase (DNA) II binding protein 1 [Source:HGNC Symbol;Acc:17008]                                 |
| 2134 | ENSG00000164626 | 170.6019235 | -1.903090713 | 0.238986625 | 1.47E-14 | KCNK5    | potassium channel, subfamily K, member 5 [Source:HGNC Symbol;Acc:6280]                                  |
| 2135 | ENSG00000157388 | 183.0171058 | -1.901129967 | 0.239040914 | 1.59E-14 | CACNA1D  | calcium channel, voltage-dependent, L type, alpha 1D subunit [Source:HGNC Symbol;Acc:1391]              |
| 2136 | ENSG00000006453 | 174.0376128 | -1.887882989 | 0.237388958 | 1.60E-14 | BAIAP2L1 | BAI1-associated protein 2-like 1 [Source:HGNC Symbol;Acc:21649]                                         |
| 2137 | ENSG00000183023 | 468.3723251 | 1.478649174  | 0.185945145 | 1.61E-14 | SLC8A1   | solute carrier family 8 (sodium/calcium exchanger), member 1 [Source:HGNC Symbol;Acc:11068]             |
| 2138 | ENSG00000174130 | 2510.719827 | 0.615650203  | 0.077435105 | 1.63E-14 | TLR6     | toll-like receptor 6 [Source:HGNC Symbol;Acc:16711]                                                     |
| 2139 | ENSG00000178996 | 2218.32871  | -0.614098688 | 0.077249519 | 1.64E-14 | SNX18    | sorting nexin 18 [Source:HGNC Symbol;Acc:19245]                                                         |
| 2140 | ENSG00000138180 | 181.1844795 | -1.921143666 | 0.241688571 | 1.65E-14 | CEP55    | centrosomal protein 55kDa [Source:HGNC Symbol;Acc:1161]                                                 |
| 2141 | ENSG00000143344 | 73.16229258 | 2.969059655  | 0.373727399 | 1.70E-14 | RGL1     | ral guanine nucleotide dissociation stimulator-like 1 [Source:HGNC Symbol;Acc:30281]                    |
| 2142 | ENSG00000080345 | 1831.722554 | -0.715417915 | 0.090065694 | 1.72E-14 | RIF1     | RAP1 interacting factor homolog (yeast) [Source:HGNC Symbol;Acc:23207]                                  |
| 2143 | ENSG00000167978 | 26923.18743 | 0.348710351  | 0.043901064 | 1.72E-14 | SRRM2    | serine/arginine repetitive matrix 2 [Source:HGNC Symbol;Acc:16639]                                      |
| 2144 | ENSG00000142556 | 461.8235451 | -1.268325848 | 0.159685567 | 1.73E-14 | ZNF614   | zinc finger protein 614 [Source:HGNC Symbol;Acc:24722]                                                  |
| 2145 | ENSG00000112339 | 1072.73036  | 0.866551808  | 0.109106534 | 1.73E-14 | HBS1L    | HBS1-like ( <i>S. cerevisiae</i> ) [Source:HGNC Symbol;Acc:4834]                                        |
| 2146 | ENSG00000115267 | 542.943251  | 1.199996501  | 0.151098341 | 1.74E-14 | IFIH1    | interferon induced with helicase C domain 1 [Source:HGNC Symbol;Acc:18873]                              |
| 2147 | ENSG00000101596 | 16099.63083 | 0.36270653   | 0.045671935 | 1.74E-14 | SMCHD1   | structural maintenance of chromosomes flexible hinge domain containing 1 [Source:HGNC Symbol;Acc:29090] |
| 2148 | ENSG00000158163 | 333.9115472 | -1.478060738 | 0.186173163 | 1.77E-14 | DZIP1L   | DAZ interacting zinc finger protein 1-like [Source:HGNC Symbol;Acc:26551]                               |
| 2149 | ENSG00000164463 | 3374.585003 | 0.579828368  | 0.0730512   | 1.80E-14 | CREBRF   | CREB3 regulatory factor [Source:HGNC Symbol;Acc:24050]                                                  |
| 2150 | ENSG00000185052 | 119.5175103 | -2.311136614 | 0.291402764 | 1.89E-14 | SLC24A3  | solute carrier family 24 (sodium/potassium/calcium exchanger), member 3 [Source:HGNC Symbol;Acc:10977]  |

|      |                 |             |              |             |          |          |                                                                                                                |
|------|-----------------|-------------|--------------|-------------|----------|----------|----------------------------------------------------------------------------------------------------------------|
| 2151 | ENSG00000131469 | 7245.186195 | 0.419013116  | 0.052838746 | 1.91E-14 | RPL27    | ribosomal protein L27 [Source:HGNC Symbol;Acc:10328]                                                           |
| 2152 | ENSG00000095370 | 1845.72367  | 0.856926073  | 0.108130055 | 1.98E-14 | SH2D3C   | SH2 domain containing 3C [Source:HGNC Symbol;Acc:16884]                                                        |
| 2153 | ENSG00000182272 | 29.98228787 | 4.215391171  | 0.532083504 | 2.02E-14 | B4GALNT4 | beta-1,4-N-acetyl-galactosaminyl transferase 4 [Source:HGNC Symbol;Acc:26315]                                  |
| 2154 | ENSG00000228278 | 311.2429817 | -1.46213853  | 0.18466324  | 2.10E-14 | ORM2     | orosomucoid 2 [Source:HGNC Symbol;Acc:8499]                                                                    |
| 2155 | ENSG00000151893 | 2228.486346 | -0.623249122 | 0.078727762 | 2.12E-14 | CACUL1   | CDK2-associated, cullin domain 1 [Source:HGNC Symbol;Acc:23727]                                                |
| 2156 | ENSG00000261923 | 848.6147484 | 1.036088842  | 0.13088353  | 2.13E-14 | PDE3B    | phosphodiesterase 3B, cGMP-inhibited [Source:HGNC Symbol;Acc:8779]                                             |
| 2157 | ENSG00000101294 | 2949.815137 | -0.55458517  | 0.070078147 | 2.17E-14 | HM13     | histocompatibility (minor) 13 [Source:HGNC Symbol;Acc:16435]                                                   |
| 2158 | ENSG00000175591 | 226.3367344 | -1.674897604 | 0.211723871 | 2.22E-14 | P2RY2    | purinergic receptor P2Y, G-protein coupled, 2 [Source:HGNC Symbol;Acc:8541]                                    |
| 2159 | ENSG00000152270 | 848.4172009 | 1.035266928  | 0.130879314 | 2.23E-14 | PDE3B    | phosphodiesterase 3B, cGMP-inhibited [Source:HGNC Symbol;Acc:8779]                                             |
| 2160 | ENSG00000169902 | 355.943178  | 1.471638339  | 0.186087957 | 2.26E-14 | TPST1    | tyrosylprotein sulfotransferase 1 [Source:HGNC Symbol;Acc:12020]                                               |
| 2161 | ENSG00000140968 | 626.3462748 | 1.212073993  | 0.153299712 | 2.29E-14 | IRF8     | interferon regulatory factor 8 [Source:HGNC Symbol;Acc:5358]                                                   |
| 2162 | ENSG00000122986 | 1557.878308 | 0.744903585  | 0.094257891 | 2.36E-14 | HVCN1    | hydrogen voltage-gated channel 1 [Source:HGNC Symbol;Acc:28240]                                                |
| 2163 | ENSG00000151623 | 169.6049499 | 2.266119615  | 0.286778352 | 2.37E-14 | NR3C2    | nuclear receptor subfamily 3, group C, member 2 [Source:HGNC Symbol;Acc:7979]                                  |
| 2164 | ENSG00000149150 | 319.1522394 | -1.419631447 | 0.179865972 | 2.56E-14 | SLC43A1  | solute carrier family 43 (amino acid system L transporter), member 1 [Source:HGNC Symbol;Acc:9225]             |
| 2165 | ENSG00000092421 | 340.6852909 | 1.393445034  | 0.176550571 | 2.56E-14 | SEMA6A   | sema domain, transmembrane domain (TM), and cytoplasmic domain, (semaphorin) 6A [Source:HGNC Symbol;Acc:10738] |
| 2166 | ENSG00000175344 | 257.0060092 | -1.592249626 | 0.201786936 | 2.60E-14 | CHRNA7   | cholinergic receptor, nicotinic, alpha 7 (neuronal) [Source:HGNC Symbol;Acc:1960]                              |
| 2167 | ENSG00000140280 | 641.0350141 | 1.052508449  | 0.133459113 | 2.69E-14 | LYSMD2   | LysM, putative peptidoglycan-binding, domain containing 2 [Source:HGNC Symbol;Acc:28571]                       |
| 2168 | ENSG00000111145 | 663.6322457 | 1.122467508  | 0.142339757 | 2.70E-14 | ELK3     | ELK3, ETS-domain protein (SRF accessory protein 2) [Source:HGNC Symbol;Acc:3325]                               |
| 2169 | ENSG00000242386 | 119.8340936 | 2.41575913   | 0.306679089 | 2.89E-14 | HLA-DMB  | major histocompatibility complex, class II, DM beta [Source:HGNC Symbol;Acc:4935]                              |
| 2170 | ENSG00000138071 | 13337.15872 | -0.393574484 | 0.049967351 | 2.90E-14 | ACTR2    | ARP2 actin-related protein 2 homolog (yeast) [Source:HGNC Symbol;Acc:169]                                      |
| 2171 | ENSG00000182179 | 4273.276187 | 0.599481744  | 0.076130778 | 2.95E-14 | UBA7     | ubiquitin-like modifier activating enzyme 7 [Source:HGNC Symbol;Acc:12471]                                     |
| 2172 | ENSG00000100353 | 2980.403076 | 0.548052811  | 0.069626699 | 3.02E-14 | EIF3D    | eukaryotic translation initiation factor 3, subunit D [Source:HGNC Symbol;Acc:3278]                            |
| 2173 | ENSG00000133316 | 700.8649112 | -1.182528685 | 0.150237342 | 3.03E-14 | WDR74    | WD repeat domain 74 [Source:HGNC Symbol;Acc:25529]                                                             |
| 2174 | ENSG00000114779 | 610.3162577 | 1.178343524  | 0.149711916 | 3.03E-14 | ABHD14B  | abhydrolase domain containing 14B [Source:HGNC Symbol;Acc:28235]                                               |
| 2175 | ENSG00000119917 | 1147.754565 | 0.841934398  | 0.10697087  | 3.03E-14 | IFIT3    | interferon-induced protein with tetratricopeptide repeats 3 [Source:HGNC Symbol;Acc:5411]                      |
| 2176 | ENSG00000136888 | 1604.784161 | 0.712625993  | 0.090545341 | 3.04E-14 | ATP6V1G1 | ATPase, H+ transporting, lysosomal 13kDa, V1 subunit G1 [Source:HGNC Symbol;Acc:864]                           |
| 2177 | ENSG00000130270 | 548.272725  | -1.167374435 | 0.148364299 | 3.09E-14 | ATP8B3   | ATPase, aminophospholipid transporter, class I, type 8B, member 3 [Source:HGNC Symbol;Acc:13535]               |
| 2178 | ENSG00000241296 | 119.6820624 | 2.412774753  | 0.306706351 | 3.13E-14 | HLA-DMB  | major histocompatibility complex, class II, DM beta [Source:HGNC Symbol;Acc:4935]                              |

|      |                 |             |              |             |          |               |                                                                                        |
|------|-----------------|-------------|--------------|-------------|----------|---------------|----------------------------------------------------------------------------------------|
| 2179 | ENSG00000158856 | 499.2144334 | 1.215455895  | 0.15450995  | 3.13E-14 | DMTN          | dematin actin binding protein [Source:HGNC Symbol;Acc:3382]                            |
| 2180 | ENSG00000110880 | 3450.772772 | -0.572430123 | 0.072773606 | 3.15E-14 | CORO1C        | coronin, actin binding protein, 1C [Source:HGNC Symbol;Acc:2254]                       |
| 2181 | ENSG00000242588 | 1539.467822 | -0.742737511 | 0.09444086  | 3.18E-14 | RP11-274B21.1 |                                                                                        |
| 2182 | ENSG00000126882 | 2050.669932 | 0.820414323  | 0.104380035 | 3.30E-14 | FAM78A        | family with sequence similarity 78, member A [Source:HGNC Symbol;Acc:25465]            |
| 2183 | ENSG00000113083 | 60.6442346  | 3.474901253  | 0.442925162 | 3.70E-14 | LOX           | lysyl oxidase [Source:HGNC Symbol;Acc:6664]                                            |
| 2184 | ENSG00000156735 | 576.7638185 | -1.051306761 | 0.134012463 | 3.71E-14 | BAG4          | BCL2-associated athanogene 4 [Source:HGNC Symbol;Acc:940]                              |
| 2185 | ENSG00000198948 | 266.2535678 | -1.602698902 | 0.204341798 | 3.76E-14 | MFAP3L        | microfibrillar-associated protein 3-like [Source:HGNC Symbol;Acc:29083]                |
| 2186 | ENSG00000198055 | 4631.188208 | -0.717684704 | 0.091526317 | 3.82E-14 | GRK6          | G protein-coupled receptor kinase 6 [Source:HGNC Symbol;Acc:4545]                      |
| 2187 | ENSG00000259851 | 57.59940925 | 3.443446709  | 0.439156525 | 3.82E-14 | TRBV28        | T cell receptor beta variable 28 [Source:HGNC Symbol;Acc:12209]                        |
| 2188 | ENSG00000139187 | 332.1275905 | 1.428056106  | 0.182239159 | 3.97E-14 | KLRG1         | killer cell lectin-like receptor subfamily G, member 1 [Source:HGNC Symbol;Acc:6380]   |
| 2189 | ENSG00000162704 | 12093.68278 | -0.394857925 | 0.050392079 | 3.99E-14 | ARPCS         | actin related protein 2/3 complex, subunit 5, 16kDa [Source:HGNC Symbol;Acc:708]       |
| 2190 | ENSG00000158201 | 2919.455824 | 0.591638888  | 0.075509261 | 4.00E-14 | ABHD3         | abhydrolase domain containing 3 [Source:HGNC Symbol;Acc:18718]                         |
| 2191 | ENSG00000128699 | 2104.062859 | 0.701722931  | 0.089567769 | 4.02E-14 | ORMDL1        | ORM1-like 1 ( <i>S. cerevisiae</i> ) [Source:HGNC Symbol;Acc:16036]                    |
| 2192 | ENSG00000126804 | 1463.817413 | 0.794877719  | 0.101496374 | 4.11E-14 | ZBTB1         | zinc finger and BTB domain containing 1 [Source:HGNC Symbol;Acc:20259]                 |
| 2193 | ENSG00000204933 | 56.54100035 | -3.372409934 | 0.43062487  | 4.12E-14 | CD177P1       | CD177 molecule pseudogene 1 [Source:HGNC Symbol;Acc:34508]                             |
| 2194 | ENSG00000171310 | 2608.317582 | 0.572911748  | 0.073163972 | 4.14E-14 | CHST11        | carbohydrate (chondroitin 4) sulfotransferase 11 [Source:HGNC Symbol;Acc:17422]        |
| 2195 | ENSG00000120063 | 3554.052401 | 0.527054237  | 0.067339699 | 4.27E-14 | GNA13         | guanine nucleotide binding protein (G protein), alpha 13 [Source:HGNC Symbol;Acc:4381] |
| 2196 | ENSG00000023171 | 584.9015467 | -1.070685899 | 0.137106805 | 4.91E-14 | GRAMD1B       | GRAM domain containing 1B [Source:HGNC Symbol;Acc:29214]                               |
| 2197 | ENSG00000164032 | 4281.188397 | -0.484187464 | 0.062012401 | 4.95E-14 | H2AFZ         | H2A histone family, member Z [Source:HGNC Symbol;Acc:4741]                             |
| 2198 | ENSG00000213937 | 394.3872737 | -1.266808015 | 0.162252172 | 4.96E-14 | CLDN9         | claudin 9 [Source:HGNC Symbol;Acc:2051]                                                |
| 2199 | ENSG00000211753 | 57.25532633 | 3.434643264  | 0.439913935 | 4.96E-14 | TRBV28        | T cell receptor beta variable 28 [Source:HGNC Symbol;Acc:12209]                        |
| 2200 | ENSG00000083799 | 5089.705257 | 0.557442894  | 0.071428397 | 5.09E-14 | CYLD          | cylindromatosis (turban tumor syndrome) [Source:HGNC Symbol;Acc:2584]                  |
| 2201 | ENSG00000171596 | 183.4972847 | 1.939787325  | 0.248617845 | 5.17E-14 | NMUR1         | neuromedin U receptor 1 [Source:HGNC Symbol;Acc:4518]                                  |
| 2202 | ENSG00000196074 | 473.5155745 | -1.328254082 | 0.170285982 | 5.26E-14 | SYCP2         | synaptonemal complex protein 2 [Source:HGNC Symbol;Acc:11490]                          |
| 2203 | ENSG00000141424 | 482.5922992 | 1.292608423  | 0.165727346 | 5.28E-14 | SLC39A6       | solute carrier family 39 (zinc transporter), member 6 [Source:HGNC Symbol;Acc:18607]   |
| 2204 | ENSG00000114805 | 97.06085005 | -2.502974555 | 0.320995474 | 5.36E-14 | PLCH1         | phospholipase C, eta 1 [Source:HGNC Symbol;Acc:29185]                                  |
| 2205 | ENSG00000111897 | 4838.509626 | 0.496195368  | 0.063694635 | 5.68E-14 | SERINC1       | serine incorporator 1 [Source:HGNC Symbol;Acc:13464]                                   |
| 2206 | ENSG00000132510 | 5374.47573  | -0.760309136 | 0.09765857  | 5.90E-14 | KDM6B         | lysine (K)-specific demethylase 6B [Source:HGNC Symbol;Acc:29012]                      |

|      |                 |             |              |             |          |          |                                                                                                                            |
|------|-----------------|-------------|--------------|-------------|----------|----------|----------------------------------------------------------------------------------------------------------------------------|
| 2207 | ENSG00000135414 | 200.5019835 | 2.072320147  | 0.266282775 | 6.03E-14 | GDF11    | growth differentiation factor 11 [Source:HGNC Symbol;Acc:4216]                                                             |
| 2208 | ENSG00000163820 | 530.7314976 | 1.229986016  | 0.158048026 | 6.03E-14 | FYCO1    | FYVE and coiled-coil domain containing 1 [Source:HGNC Symbol;Acc:14673]                                                    |
| 2209 | ENSG00000151835 | 728.5971204 | 1.122571091  | 0.144268771 | 6.09E-14 | SACS     | spastic ataxia of Charlevoix-Saguenay (sacsin) [Source:HGNC Symbol;Acc:10519]                                              |
| 2210 | ENSG00000085185 | 935.5366221 | -0.852050739 | 0.109526257 | 6.17E-14 | BCORL1   | BCL6 corepressor-like 1 [Source:HGNC Symbol;Acc:25657]                                                                     |
| 2211 | ENSG00000110395 | 5068.123583 | -0.465188816 | 0.059840938 | 6.45E-14 | CBL      | Cbl proto-oncogene, E3 ubiquitin protein ligase [Source:HGNC Symbol;Acc:1541]                                              |
| 2212 | ENSG00000164466 | 1063.974307 | -0.940381672 | 0.121010893 | 6.59E-14 | SFXN1    | sideroflexin 1 [Source:HGNC Symbol;Acc:16085]                                                                              |
| 2213 | ENSG00000114331 | 5884.007662 | -0.496775518 | 0.063953725 | 6.76E-14 | ACAP2    | ArfGAP with coiled-coil, ankyrin repeat and PH domains 2 [Source:HGNC Symbol;Acc:16469]                                    |
| 2214 | ENSG00000125304 | 5718.679671 | -0.45899682  | 0.059129163 | 7.03E-14 | TM9SF2   | transmembrane 9 superfamily member 2 [Source:HGNC Symbol;Acc:11865]                                                        |
| 2215 | ENSG00000159433 | 458.2608277 | 1.198653868  | 0.154492453 | 7.25E-14 | STARD9   | StAR-related lipid transfer (START) domain containing 9 [Source:HGNC Symbol;Acc:19162]                                     |
| 2216 | ENSG00000153113 | 3927.511854 | -0.612013589 | 0.078895675 | 7.33E-14 | CAST     | calpastatin [Source:HGNC Symbol;Acc:1515]                                                                                  |
| 2217 | ENSG00000169919 | 1593.198747 | -0.681261773 | 0.087828674 | 7.36E-14 | GUSB     | glucuronidase, beta [Source:HGNC Symbol;Acc:4696]                                                                          |
| 2218 | ENSG00000182606 | 819.6779684 | 0.91473432   | 0.118011645 | 7.68E-14 | TRAK1    | trafficking protein, kinesin binding 1 [Source:HGNC Symbol;Acc:29947]                                                      |
| 2219 | ENSG00000145569 | 863.6918591 | -0.930580684 | 0.120057562 | 7.68E-14 | FAM105A  | family with sequence similarity 105, member A [Source:HGNC Symbol;Acc:25629]                                               |
| 2220 | ENSG00000051341 | 280.4923136 | -1.593374123 | 0.205634682 | 7.83E-14 | POLQ     | polymerase (DNA directed), theta [Source:HGNC Symbol;Acc:9186]                                                             |
| 2221 | ENSG00000196586 | 112.2925902 | 2.4748064    | 0.31942912  | 7.89E-14 | MYO6     | myosin VI [Source:HGNC Symbol;Acc:7605]                                                                                    |
| 2222 | ENSG00000039560 | 75.19456903 | 3.07439998   | 0.396859104 | 7.93E-14 | RAI14    | retinoic acid induced 14 [Source:HGNC Symbol;Acc:14873]                                                                    |
| 2223 | ENSG00000226264 | 141.3248476 | 2.069990566  | 0.267232404 | 7.98E-14 | HLA-DMB  | major histocompatibility complex, class II, DM beta [Source:HGNC Symbol;Acc:4935]                                          |
| 2224 | ENSG00000196937 | 301.8545438 | 1.56113472   | 0.201613571 | 8.16E-14 | FAM3C    | family with sequence similarity 3, member C [Source:HGNC Symbol;Acc:18664]                                                 |
| 2225 | ENSG00000172375 | 2004.468803 | -0.732648223 | 0.094658195 | 8.37E-14 | C2CD2L   | C2CD2-like [Source:HGNC Symbol;Acc:29000]                                                                                  |
| 2226 | ENSG00000107371 | 499.5798182 | -1.176654372 | 0.152129188 | 8.72E-14 | EXOSC3   | exosome component 3 [Source:HGNC Symbol;Acc:17944]                                                                         |
| 2227 | ENSG00000134996 | 3524.420856 | -0.524975123 | 0.067878048 | 8.75E-14 | OSTF1    | osteoclast stimulating factor 1 [Source:HGNC Symbol;Acc:8510]                                                              |
| 2228 | ENSG00000078124 | 400.2822503 | -1.262580561 | 0.16328626  | 8.87E-14 | ACER3    | alkaline ceramidase 3 [Source:HGNC Symbol;Acc:16066]                                                                       |
| 2229 | ENSG00000067182 | 3638.444258 | 0.573856987  | 0.074222237 | 8.92E-14 | TNFRSF1A | tumor necrosis factor receptor superfamily, member 1A [Source:HGNC Symbol;Acc:11916]                                       |
| 2230 | ENSG00000076685 | 7522.962946 | -0.440325974 | 0.056972843 | 9.12E-14 | NT5C2    | 5'-nucleotidase, cytosolic II [Source:HGNC Symbol;Acc:8022]                                                                |
| 2231 | ENSG00000169100 | 2333.26737  | 0.876575924  | 0.113425194 | 9.15E-14 | SLC25A6  | solute carrier family 25 (mitochondrial carrier; adenine nucleotide translocator), member 6 [Source:HGNC Symbol;Acc:10992] |
| 2232 | ENSG00000196814 | 508.477768  | -1.281690589 | 0.165886106 | 9.28E-14 | MVB12B   | multivesicular body subunit 12B [Source:HGNC Symbol;Acc:23368]                                                             |
| 2233 | ENSG00000125827 | 3267.008193 | 0.566373122  | 0.073335421 | 9.52E-14 | TMX4     | thioredoxin-related transmembrane protein 4 [Source:HGNC Symbol;Acc:25237]                                                 |
| 2234 | ENSG00000169740 | 235.9098471 | 1.664794772  | 0.215875964 | 1.04E-13 | ZNF32    | zinc finger protein 32 [Source:HGNC Symbol;Acc:13095]                                                                      |

|      |                 |             |              |             |          |               |                                                                                                                                          |
|------|-----------------|-------------|--------------|-------------|----------|---------------|------------------------------------------------------------------------------------------------------------------------------------------|
| 2235 | ENSG00000068489 | 255.1929244 | -1.501759148 | 0.194965196 | 1.12E-13 | PRR11         | proline rich 11 [Source:HGNC Symbol;Acc:25619]                                                                                           |
| 2236 | ENSG00000131634 | 102.3244953 | 2.71338138   | 0.352304003 | 1.12E-13 | TMEM204       | transmembrane protein 204 [Source:HGNC Symbol;Acc:14158]                                                                                 |
| 2237 | ENSG00000136878 | 2099.400976 | -0.943966268 | 0.122585201 | 1.13E-13 | USP20         | ubiquitin specific peptidase 20 [Source:HGNC Symbol;Acc:12619]                                                                           |
| 2238 | ENSG00000160117 | 386.4466997 | -1.265690257 | 0.164462487 | 1.17E-13 | ANKLE1        | ankyrin repeat and LEM domain containing 1 [Source:HGNC Symbol;Acc:26812]                                                                |
| 2239 | ENSG00000111229 | 12195.71127 | -0.388217359 | 0.05056328  | 1.35E-13 | ARPC3         | actin related protein 2/3 complex, subunit 3, 21kDa [Source:HGNC Symbol;Acc:706]                                                         |
| 2240 | ENSG00000119865 | 119.4609428 | -2.158710841 | 0.281263572 | 1.38E-13 | CNRIP1        | cannabinoid receptor interacting protein 1 [Source:HGNC Symbol;Acc:24546]                                                                |
| 2241 | ENSG00000169203 | 1928.463809 | -0.610631041 | 0.079579241 | 1.40E-13 | RP11-231C14.4 | Uncharacterized protein [Source:UniProtKB/TrEMBL;Acc:A8MQ56]                                                                             |
| 2242 | ENSG00000076003 | 946.4942896 | -0.91620426  | 0.119548439 | 1.51E-13 | MCM6          | minichromosome maintenance complex component 6 [Source:HGNC Symbol;Acc:6949]                                                             |
| 2243 | ENSG00000164066 | 697.9174085 | -0.962985661 | 0.125654268 | 1.51E-13 | INTU          | inturned planar cell polarity protein [Source:HGNC Symbol;Acc:29239]                                                                     |
| 2244 | ENSG00000158711 | 1510.656736 | 0.881227996  | 0.115046517 | 1.55E-13 | ELK4          | ELK4, ETS-domain protein (SRF accessory protein 1) [Source:HGNC Symbol;Acc:3326]                                                         |
| 2245 | ENSG00000158805 | 2716.928543 | 0.685589509  | 0.089514494 | 1.56E-13 | ZNF276        | zinc finger protein 276 [Source:HGNC Symbol;Acc:23330]                                                                                   |
| 2246 | ENSG00000273135 | 988.6794618 | 0.977127228  | 0.127616202 | 1.59E-13 | RPS9          |                                                                                                                                          |
| 2247 | ENSG00000273385 | 988.6794618 | 0.977127228  | 0.127616202 | 1.59E-13 | RPS9          |                                                                                                                                          |
| 2248 | ENSG00000272943 | 988.6794618 | 0.977127228  | 0.127616202 | 1.59E-13 | RPS9          |                                                                                                                                          |
| 2249 | ENSG00000273467 | 988.6794618 | 0.977127228  | 0.127616202 | 1.59E-13 | RPS9          |                                                                                                                                          |
| 2250 | ENSG00000142687 | 4715.670212 | -0.506681338 | 0.066179057 | 1.59E-13 | KIAA0319L     | KIAA0319-like [Source:HGNC Symbol;Acc:30071]                                                                                             |
| 2251 | ENSG00000057252 | 866.0908601 | 0.905910282  | 0.118336225 | 1.60E-13 | SOAT1         | sterol O-acyltransferase 1 [Source:HGNC Symbol;Acc:11177]                                                                                |
| 2252 | ENSG00000141854 | 274.8084676 | -1.485424712 | 0.194041283 | 1.60E-13 | hsa-mir-1199  | hsa-mir-1199 [Source:miRBase;Acc:MI0020340]                                                                                              |
| 2253 | ENSG00000110665 | 5137.477072 | -0.541557512 | 0.070760853 | 1.63E-13 | C11orf21      | chromosome 11 open reading frame 21 [Source:HGNC Symbol;Acc:13231]                                                                       |
| 2254 | ENSG00000182923 | 2319.895776 | 0.597318163  | 0.078055564 | 1.64E-13 | CEP63         | centrosomal protein 63kDa [Source:HGNC Symbol;Acc:25815]                                                                                 |
| 2255 | ENSG00000178752 | 48.54172067 | -3.474757273 | 0.454077486 | 1.64E-13 | FAM132B       | family with sequence similarity 132, member B [Source:HGNC Symbol;Acc:26727]                                                             |
| 2256 | ENSG00000179335 | 3142.374043 | -0.544526963 | 0.071190084 | 1.68E-13 | CLK3          | CDC-like kinase 3 [Source:HGNC Symbol;Acc:2071]                                                                                          |
| 2257 | ENSG00000126391 | 1054.983818 | 0.898956445  | 0.117554908 | 1.70E-13 | FRMD8         | FERM domain containing 8 [Source:HGNC Symbol;Acc:25462]                                                                                  |
| 2258 | ENSG00000137492 | 1268.298247 | 0.800006776  | 0.104693928 | 1.78E-13 | PRKRIR        | protein-kinase, interferon-inducible double stranded RNA dependent inhibitor, repressor of (P58 repressor) [Source:HGNC Symbol;Acc:9440] |
| 2259 | ENSG00000172175 | 942.668931  | 0.919946529  | 0.120450304 | 1.83E-13 | MALT1         | mucosa associated lymphoid tissue lymphoma translocation gene 1 [Source:HGNC Symbol;Acc:6819]                                            |
| 2260 | ENSG00000204252 | 69.12616516 | 3.194750985  | 0.418348821 | 1.85E-13 | HLA-DOA       | major histocompatibility complex, class II, DO alpha [Source:HGNC Symbol;Acc:4936]                                                       |
| 2261 | ENSG00000140367 | 487.1122495 | 1.32506076   | 0.17358666  | 1.89E-13 | UBE2Q2        | ubiquitin-conjugating enzyme E2Q family member 2 [Source:HGNC Symbol;Acc:19248]                                                          |
| 2262 | ENSG00000126432 | 3142.34992  | -0.616365654 | 0.08075565  | 1.91E-13 | PRDX5         | peroxiredoxin 5 [Source:HGNC Symbol;Acc:9355]                                                                                            |

|      |                 |             |              |             |          |             |                                                                                                                |
|------|-----------------|-------------|--------------|-------------|----------|-------------|----------------------------------------------------------------------------------------------------------------|
| 2263 | ENSG00000272643 | 989.0857548 | 0.976046577  | 0.127882637 | 1.91E-13 | RPS9        |                                                                                                                |
| 2264 | ENSG00000272614 | 989.274561  | 0.976611646  | 0.127973676 | 1.92E-13 | RPS9        |                                                                                                                |
| 2265 | ENSG00000128641 | 105.7427384 | 2.438530406  | 0.31958903  | 1.94E-13 | MYO1B       | myosin IB [Source:HGNC Symbol;Acc:7596]                                                                        |
| 2266 | ENSG00000143365 | 141.9219915 | 2.270809759  | 0.297649152 | 1.95E-13 | RORC        | RAR-related orphan receptor C [Source:HGNC Symbol;Acc:10260]                                                   |
| 2267 | ENSG00000162383 | 58.50124259 | 3.314844625  | 0.434541861 | 1.96E-13 | SLC1A7      | solute carrier family 1 (glutamate transporter), member 7 [Source:HGNC Symbol;Acc:10945]                       |
| 2268 | ENSG00000164663 | 678.9087634 | -0.956798898 | 0.12545442  | 1.99E-13 | USP49       | ubiquitin specific peptidase 49 [Source:HGNC Symbol;Acc:20078]                                                 |
| 2269 | ENSG00000163694 | 1580.132196 | 0.701034024  | 0.091957413 | 2.04E-13 | RBM47       | RNA binding motif protein 47 [Source:HGNC Symbol;Acc:30358]                                                    |
| 2270 | ENSG00000113448 | 1117.359808 | -0.996768272 | 0.13077655  | 2.06E-13 | PDE4D       | phosphodiesterase 4D, cAMP-specific [Source:HGNC Symbol;Acc:8783]                                              |
| 2271 | ENSG00000146215 | 216.2108077 | -1.772464578 | 0.232630297 | 2.10E-13 | CRIP3       | cysteine-rich protein 3 [Source:HGNC Symbol;Acc:17751]                                                         |
| 2272 | ENSG00000164649 | 1405.765602 | -0.756998385 | 0.099375687 | 2.13E-13 | CDCA7L      | cell division cycle associated 7-like [Source:HGNC Symbol;Acc:30777]                                           |
| 2273 | ENSG00000172164 | 948.3939786 | -1.086912271 | 0.142689545 | 2.13E-13 | SNTB1       | syntrophin, beta 1 (dystrophin-associated protein A1, 59kDa, basic component 1) [Source:HGNC Symbol;Acc:11168] |
| 2274 | ENSG00000072958 | 1588.176527 | -0.764209636 | 0.100346707 | 2.16E-13 | AP1M1       | adaptor-related protein complex 1, mu 1 subunit [Source:HGNC Symbol;Acc:13667]                                 |
| 2275 | ENSG00000168876 | 978.2012472 | 0.849470867  | 0.111549184 | 2.17E-13 | ANKRD49     | ankyrin repeat domain 49 [Source:HGNC Symbol;Acc:25970]                                                        |
| 2276 | ENSG00000116514 | 3027.24954  | 0.530683755  | 0.069722155 | 2.23E-13 | RNF19B      | ring finger protein 19B [Source:HGNC Symbol;Acc:26886]                                                         |
| 2277 | ENSG00000144746 | 4095.310629 | 0.513311117  | 0.067460389 | 2.27E-13 | ARL6IP5     | ADP-ribosylation-like factor 6 interacting protein 5 [Source:HGNC Symbol;Acc:16937]                            |
| 2278 | ENSG00000082074 | 10394.64547 | 0.414069975  | 0.054451423 | 2.35E-13 | FYB         | FYN binding protein [Source:HGNC Symbol;Acc:4036]                                                              |
| 2279 | ENSG00000099139 | 221.2040606 | -1.86979085  | 0.246049135 | 2.45E-13 | PCSK5       | proprotein convertase subtilisin/kexin type 5 [Source:HGNC Symbol;Acc:8747]                                    |
| 2280 | ENSG00000169554 | 2385.798315 | 0.597548293  | 0.078646189 | 2.47E-13 | ZEB2        | zinc finger E-box binding homeobox 2 [Source:HGNC Symbol;Acc:14881]                                            |
| 2281 | ENSG00000114648 | 1404.290292 | -0.787286863 | 0.10366792  | 2.54E-13 | KLHL18      | kelch-like family member 18 [Source:HGNC Symbol;Acc:29120]                                                     |
| 2282 | ENSG00000269374 | 79.686892   | -2.629614864 | 0.346323152 | 2.56E-13 | CTB-50E14.5 |                                                                                                                |
| 2283 | ENSG00000134313 | 3017.629466 | -0.67822236  | 0.089324772 | 2.57E-13 | KIDINS220   | kinase D-interacting substrate, 220kDa [Source:HGNC Symbol;Acc:29508]                                          |
| 2284 | ENSG00000223547 | 431.2955491 | 1.205751975  | 0.15881652  | 2.58E-13 | ZNF844      | zinc finger protein 844 [Source:HGNC Symbol;Acc:25932]                                                         |
| 2285 | ENSG00000139496 | 1903.598444 | -0.669896333 | 0.088256002 | 2.61E-13 | NUPL1       | nucleoporin like 1 [Source:HGNC Symbol;Acc:20261]                                                              |
| 2286 | ENSG00000175455 | 1983.715447 | -0.76200241  | 0.100402345 | 2.63E-13 | CCDC14      | coiled-coil domain containing 14 [Source:HGNC Symbol;Acc:25766]                                                |
| 2287 | ENSG00000169908 | 40.64900538 | 3.854522912  | 0.508255573 | 2.75E-13 | TM4SF1      | transmembrane 4 L six family member 1 [Source:HGNC Symbol;Acc:11853]                                           |
| 2288 | ENSG00000118308 | 3445.205368 | 0.557994924  | 0.073579205 | 2.75E-13 | LRMP        | lymphoid-restricted membrane protein [Source:HGNC Symbol;Acc:6690]                                             |
| 2289 | ENSG00000170049 | 414.6316225 | -1.238330938 | 0.163384152 | 2.84E-13 | KCNAB3      | potassium voltage-gated channel, shaker-related subfamily, beta member 3 [Source:HGNC Symbol;Acc:6230]         |
| 2290 | ENSG00000197766 | 180.77016   | 1.907528795  | 0.251693022 | 2.85E-13 | CFD         | complement factor D (adipsin) [Source:HGNC Symbol;Acc:2771]                                                    |



|      |                 |             |              |             |          |             |                                                                                                              |
|------|-----------------|-------------|--------------|-------------|----------|-------------|--------------------------------------------------------------------------------------------------------------|
| 2291 | ENSG00000139793 | 226.7441405 | 1.72786225   | 0.228060569 | 2.90E-13 | MBNL2       | muscleblind-like splicing regulator 2 [Source:HGNC Symbol;Acc:16746]                                         |
| 2292 | ENSG00000173262 | 156.6975807 | -1.895589801 | 0.250199728 | 2.90E-13 | SLC2A14     | solute carrier family 2 (facilitated glucose transporter), member 14 [Source:HGNC Symbol;Acc:18301]          |
| 2293 | ENSG00000084676 | 3234.347446 | 0.603016728  | 0.079601525 | 2.92E-13 | NCOA1       | nuclear receptor coactivator 1 [Source:HGNC Symbol;Acc:7668]                                                 |
| 2294 | ENSG00000105968 | 3074.66868  | -0.626068037 | 0.082679638 | 2.99E-13 | H2AFV       | H2A histone family, member V [Source:HGNC Symbol;Acc:20664]                                                  |
| 2295 | ENSG00000176390 | 2923.837135 | -0.550529499 | 0.072733787 | 3.06E-13 | CRLF3       | cytokine receptor-like factor 3 [Source:HGNC Symbol;Acc:17177]                                               |
| 2296 | ENSG00000107262 | 1106.451651 | 0.771691799  | 0.101958982 | 3.07E-13 | BAG1        | BCL2-associated athanogene [Source:HGNC Symbol;Acc:937]                                                      |
| 2297 | ENSG00000142186 | 1027.822156 | 0.981472961  | 0.129704582 | 3.11E-13 | SCYL1       | SCY1-like 1 (S. cerevisiae) [Source:HGNC Symbol;Acc:14372]                                                   |
| 2298 | ENSG00000147138 | 201.5211015 | 1.858826731  | 0.245693339 | 3.14E-13 | GPR174      | G protein-coupled receptor 174 [Source:HGNC Symbol;Acc:30245]                                                |
| 2299 | ENSG00000170956 | 3422.191988 | -0.502860913 | 0.066468533 | 3.15E-13 | CEACAM3     | carcinoembryonic antigen-related cell adhesion molecule 3 [Source:HGNC Symbol;Acc:1815]                      |
| 2300 | ENSG00000239713 | 1454.659777 | 0.705815508  | 0.093335702 | 3.23E-13 | APOBEC3G    | apolipoprotein B mRNA editing enzyme, catalytic polypeptide-like 3G [Source:HGNC Symbol;Acc:17357]           |
| 2301 | ENSG00000196865 | 939.5354719 | -0.929934794 | 0.123000206 | 3.27E-13 | NHLRC2      | NHL repeat containing 2 [Source:HGNC Symbol;Acc:24731]                                                       |
| 2302 | ENSG00000166046 | 1510.580995 | -0.829955258 | 0.109796159 | 3.30E-13 | TCP11L2     | t-complex 11, testis-specific-like 2 [Source:HGNC Symbol;Acc:28627]                                          |
| 2303 | ENSG00000263528 | 287.8750729 | 1.532073454  | 0.202792593 | 3.41E-13 | IKBKE       | inhibitor of kappa light polypeptide gene enhancer in B-cells, kinase epsilon [Source:HGNC Symbol;Acc:14552] |
| 2304 | ENSG00000167671 | 917.4973411 | 1.043193435  | 0.138109769 | 3.45E-13 | UBXN6       | UBX domain protein 6 [Source:HGNC Symbol;Acc:14928]                                                          |
| 2305 | ENSG00000140368 | 4057.534172 | -0.687937262 | 0.091090561 | 3.47E-13 | PSTPIP1     | proline-serine-threonine phosphatase interacting protein 1 [Source:HGNC Symbol;Acc:9580]                     |
| 2306 | ENSG00000007264 | 293.9104318 | 1.578942915  | 0.209115655 | 3.52E-13 | MATK        | megakaryocyte-associated tyrosine kinase [Source:HGNC Symbol;Acc:6906]                                       |
| 2307 | ENSG00000167693 | 81.54175057 | -2.730501532 | 0.361645401 | 3.52E-13 | NXN         | nucleoredoxin [Source:HGNC Symbol;Acc:18008]                                                                 |
| 2308 | ENSG00000139178 | 3414.306795 | -0.542973526 | 0.071916906 | 3.53E-13 | C1RL        | complement component 1, r subcomponent-like [Source:HGNC Symbol;Acc:21265]                                   |
| 2309 | ENSG00000170921 | 664.818573  | -1.106680332 | 0.146684709 | 3.68E-13 | TANC2       | tetratricopeptide repeat, ankyrin repeat and coiled-coil containing 2 [Source:HGNC Symbol;Acc:30212]         |
| 2310 | ENSG00000104450 | 483.4417162 | -1.108588756 | 0.146953009 | 3.70E-13 | SPAG1       | sperm associated antigen 1 [Source:HGNC Symbol;Acc:11212]                                                    |
| 2311 | ENSG00000065559 | 1414.627721 | 0.809449925  | 0.107308845 | 3.71E-13 | MAP2K4      | mitogen-activated protein kinase kinase 4 [Source:HGNC Symbol;Acc:6844]                                      |
| 2312 | ENSG00000175097 | 78.80209995 | 2.636772356  | 0.34965443  | 3.77E-13 | RAG2        | recombination activating gene 2 [Source:HGNC Symbol;Acc:9832]                                                |
| 2313 | ENSG00000244560 | 140.6585568 | 2.043794828  | 0.271083552 | 3.82E-13 | RP4-800G7.2 |                                                                                                              |
| 2314 | ENSG00000234704 | 2140.880848 | -0.632567099 | 0.083921106 | 3.87E-13 | BRD2        | bromodomain containing 2 [Source:HGNC Symbol;Acc:1103]                                                       |
| 2315 | ENSG00000164828 | 712.8086191 | 0.986183862  | 0.130845544 | 3.89E-13 | SUN1        | Sad1 and UNC84 domain containing 1 [Source:HGNC Symbol;Acc:18587]                                            |
| 2316 | ENSG00000136877 | 427.4466665 | 1.194794342  | 0.15857009  | 3.95E-13 | FPGS        | folylpolyglutamate synthase [Source:HGNC Symbol;Acc:3824]                                                    |
| 2317 | ENSG00000115850 | 35.86295045 | 3.840700404  | 0.509990135 | 4.07E-13 | LCT         | lactase [Source:HGNC Symbol;Acc:6530]                                                                        |
| 2318 | ENSG00000151338 | 966.3591084 | -0.867554232 | 0.115205184 | 4.08E-13 | MIPOL1      | mirror-image polydactyly 1 [Source:HGNC Symbol;Acc:21460]                                                    |

|      |                 |             |              |             |          |          |                                                                                                       |
|------|-----------------|-------------|--------------|-------------|----------|----------|-------------------------------------------------------------------------------------------------------|
| 2319 | ENSG00000089692 | 151.1680123 | 2.302710104  | 0.30591641  | 4.18E-13 | LAG3     | lymphocyte-activation gene 3 [Source:HGNC Symbol;Acc:6476]                                            |
| 2320 | ENSG00000241674 | 140.0813232 | 2.013340332  | 0.267762128 | 4.45E-13 | HLA-DMB  | major histocompatibility complex, class II, DM beta [Source:HGNC Symbol;Acc:4935]                     |
| 2321 | ENSG00000258839 | 214.3296678 | 1.76044405   | 0.234170595 | 4.49E-13 | MC1R     | melanocortin 1 receptor (alpha melanocyte stimulating hormone receptor) [Source:HGNC Symbol;Acc:6929] |
| 2322 | ENSG00000140931 | 1381.086839 | 0.736283537  | 0.097958016 | 4.54E-13 | CMTM3    | CKLF-like MARVEL transmembrane domain containing 3 [Source:HGNC Symbol;Acc:19174]                     |
| 2323 | ENSG00000139192 | 751.8127658 | 1.032661913  | 0.137398644 | 4.56E-13 | TAPBP1   | TAP binding protein-like [Source:HGNC Symbol;Acc:30683]                                               |
| 2324 | ENSG00000083444 | 1788.854529 | -0.659339446 | 0.087727221 | 4.56E-13 | PLOD1    | procollagen-lysine, 2-oxoglutarate 5-dioxygenase 1 [Source:HGNC Symbol;Acc:9081]                      |
| 2325 | ENSG00000129055 | 866.0700604 | 0.874908367  | 0.116460402 | 4.67E-13 | ANAPC13  | anaphase promoting complex subunit 13 [Source:HGNC Symbol;Acc:24540]                                  |
| 2326 | ENSG00000147684 | 1088.575993 | -0.74752199  | 0.099536791 | 4.76E-13 | NDUFB9   | NADH dehydrogenase (ubiquinone) 1 beta subcomplex, 9, 22kDa [Source:HGNC Symbol;Acc:7704]             |
| 2327 | ENSG00000251369 | 335.7722659 | 1.343398886  | 0.17906421  | 5.04E-13 | ZNF550   | zinc finger protein 550 [Source:HGNC Symbol;Acc:28643]                                                |
| 2328 | ENSG00000129187 | 605.5433371 | 1.04185101   | 0.138883338 | 5.07E-13 | DCTD     | dCMP deaminase [Source:HGNC Symbol;Acc:2710]                                                          |
| 2329 | ENSG00000161267 | 728.656698  | -0.910892355 | 0.121436902 | 5.09E-13 | BDH1     | 3-hydroxybutyrate dehydrogenase, type 1 [Source:HGNC Symbol;Acc:1027]                                 |
| 2330 | ENSG00000253719 | 1993.10147  | 0.60636131   | 0.080852151 | 5.14E-13 | ATXN7L3B | ataxin 7-like 3B [Source:HGNC Symbol;Acc:37931]                                                       |
| 2331 | ENSG00000092199 | 9855.738555 | 0.376136734  | 0.050154731 | 5.14E-13 | HNRNPC   | heterogeneous nuclear ribonucleoprotein C (C1/C2) [Source:HGNC Symbol;Acc:5035]                       |
| 2332 | ENSG00000010256 | 1764.713497 | -0.618275566 | 0.082445035 | 5.15E-13 | UQCRC1   | ubiquinol-cytochrome c reductase core protein I [Source:HGNC Symbol;Acc:12585]                        |
| 2333 | ENSG00000116983 | 78.40796922 | 2.976851936  | 0.39704738  | 5.22E-13 | HPCAL4   | hippocalcin like 4 [Source:HGNC Symbol;Acc:18212]                                                     |
| 2334 | ENSG00000169184 | 81.18039712 | 3.205986448  | 0.427719043 | 5.29E-13 | MN1      | meningioma (disrupted in balanced translocation) 1 [Source:HGNC Symbol;Acc:7180]                      |
| 2335 | ENSG00000116147 | 151.5719516 | -1.941499118 | 0.259071498 | 5.35E-13 | TNR      | tenascin R [Source:HGNC Symbol;Acc:11953]                                                             |
| 2336 | ENSG00000121413 | 395.6361388 | 1.291969086  | 0.172426742 | 5.40E-13 | ZSCAN18  | zinc finger and SCAN domain containing 18 [Source:HGNC Symbol;Acc:21037]                              |
| 2337 | ENSG00000255641 | 97.31198815 | 2.56232592   | 0.342068447 | 5.49E-13 | NKG2-E   | Uncharacterized protein [Source:UniProtKB/TrEMBL;Acc:F5H6K3]                                          |
| 2338 | ENSG00000056972 | 433.2844641 | 1.175729697  | 0.157004943 | 5.58E-13 | TRAF3IP2 | TRAF3 interacting protein 2 [Source:HGNC Symbol;Acc:1343]                                             |
| 2339 | ENSG00000197415 | 172.7102087 | -1.781414526 | 0.238074156 | 5.83E-13 | VEPH1    | ventricular zone expressed PH domain-containing 1 [Source:HGNC Symbol;Acc:25735]                      |
| 2340 | ENSG00000182287 | 2366.86426  | -0.626660655 | 0.0837628   | 5.88E-13 | AP1S2    | adaptor-related protein complex 1, sigma 2 subunit [Source:HGNC Symbol;Acc:560]                       |
| 2341 | ENSG00000111252 | 2967.404478 | 0.529660089  | 0.070807197 | 5.93E-13 | SH2B3    | SH2B adaptor protein 3 [Source:HGNC Symbol;Acc:29605]                                                 |
| 2342 | ENSG00000175390 | 2910.221492 | 0.524534036  | 0.07015558  | 6.09E-13 | EIF3F    | eukaryotic translation initiation factor 3, subunit F [Source:HGNC Symbol;Acc:3275]                   |
| 2343 | ENSG00000137177 | 2119.553424 | -0.660247455 | 0.088445753 | 6.65E-13 | KIF13A   | kinesin family member 13A [Source:HGNC Symbol;Acc:14566]                                              |
| 2344 | ENSG00000051009 | 3034.145286 | -0.614958759 | 0.082381552 | 6.66E-13 | FAM160A2 | family with sequence similarity 160, member A2 [Source:HGNC Symbol;Acc:25378]                         |
| 2345 | ENSG00000263185 | 390.8674236 | -1.189694377 | 0.159442705 | 6.82E-13 | TEX2     | testis expressed 2 [Source:HGNC Symbol;Acc:30884]                                                     |
| 2346 | ENSG00000136478 | 390.8669322 | -1.189687134 | 0.159441762 | 6.82E-13 | TEX2     | testis expressed 2 [Source:HGNC Symbol;Acc:30884]                                                     |

|      |                 |             |              |             |          |           |                                                                                              |
|------|-----------------|-------------|--------------|-------------|----------|-----------|----------------------------------------------------------------------------------------------|
| 2347 | ENSG00000152465 | 266.8670332 | 1.541991497  | 0.206671198 | 6.84E-13 | NMT2      | N-myristoyltransferase 2 [Source:HGNC Symbol;Acc:7858]                                       |
| 2348 | ENSG00000119684 | 236.837839  | 1.6642064    | 0.223074173 | 6.88E-13 | MLH3      | mutL homolog 3 [Source:HGNC Symbol;Acc:7128]                                                 |
| 2349 | ENSG00000174579 | 2441.753461 | 0.598669731  | 0.080253691 | 6.91E-13 | MSL2      | male-specific lethal 2 homolog (Drosophila) [Source:HGNC Symbol;Acc:25544]                   |
| 2350 | ENSG00000149532 | 4450.827905 | 0.488160371  | 0.065447045 | 6.95E-13 | CPSF7     | cleavage and polyadenylation specific factor 7, 59kDa [Source:HGNC Symbol;Acc:30098]         |
| 2351 | ENSG00000121807 | 532.0911238 | 1.145404693  | 0.153565752 | 6.95E-13 | CCR2      | chemokine (C-C motif) receptor 2 [Source:HGNC Symbol;Acc:1603]                               |
| 2352 | ENSG00000085514 | 3638.80168  | 0.495360336  | 0.066421119 | 7.00E-13 | PILRA     | paired immunoglobulin-like type 2 receptor alpha [Source:HGNC Symbol;Acc:20396]              |
| 2353 | ENSG00000107554 | 592.2087475 | -0.987140549 | 0.132382308 | 7.05E-13 | DNMBP     | dynamitin binding protein [Source:HGNC Symbol;Acc:30373]                                     |
| 2354 | ENSG00000021776 | 1364.753308 | -0.883539375 | 0.118657836 | 7.64E-13 | AQR       | aquarius intron-binding spliceosomal factor [Source:HGNC Symbol;Acc:29513]                   |
| 2355 | ENSG00000211893 | 337.7719851 | -1.298072131 | 0.17450378  | 8.08E-13 | IGHG2     | immunoglobulin heavy constant gamma 2 (G2m marker) [Source:HGNC Symbol;Acc:5526]             |
| 2356 | ENSG00000270895 | 337.7719851 | -1.298072131 | 0.17450378  | 8.08E-13 | IGHG2     | immunoglobulin heavy constant gamma 2 (G2m marker) [Source:HGNC Symbol;Acc:5526]             |
| 2357 | ENSG00000189127 | 327.3702861 | -1.542393479 | 0.207353958 | 8.09E-13 | ANKRD34B  | ankyrin repeat domain 34B [Source:HGNC Symbol;Acc:33736]                                     |
| 2358 | ENSG00000185722 | 2393.099118 | -0.552634425 | 0.07433354  | 8.33E-13 | ANKFY1    | ankyrin repeat and FYVE domain containing 1 [Source:HGNC Symbol;Acc:20763]                   |
| 2359 | ENSG00000138758 | 614.1341197 | 1.398469855  | 0.188145961 | 8.43E-13 | SEPT11    | septin 11 [Source:HGNC Symbol;Acc:25589]                                                     |
| 2360 | ENSG0000005339  | 4590.431176 | -0.478577067 | 0.064399808 | 8.52E-13 | CREBBP    | CREB binding protein [Source:HGNC Symbol;Acc:2348]                                           |
| 2361 | ENSG00000204789 | 100.587805  | 2.425938808  | 0.326533744 | 8.65E-13 | ZNF204P   | zinc finger protein 204, pseudogene [Source:HGNC Symbol;Acc:12995]                           |
| 2362 | ENSG00000189350 | 283.4039741 | 1.398807444  | 0.18830712  | 8.71E-13 | FAM179A   | family with sequence similarity 179, member A [Source:HGNC Symbol;Acc:33715]                 |
| 2363 | ENSG00000100376 | 613.7267551 | -1.075294891 | 0.144774919 | 8.77E-13 | FAM118A   | family with sequence similarity 118, member A [Source:HGNC Symbol;Acc:1313]                  |
| 2364 | ENSG00000008394 | 290.8629535 | -1.476292486 | 0.198791204 | 8.84E-13 | MGST1     | microsomal glutathione S-transferase 1 [Source:HGNC Symbol;Acc:7061]                         |
| 2365 | ENSG00000106991 | 521.6584656 | 1.107457357  | 0.149200863 | 9.09E-13 | ENG       | endoglin [Source:HGNC Symbol;Acc:3349]                                                       |
| 2366 | ENSG00000237724 | 1056.755717 | -0.926358739 | 0.124841614 | 9.24E-13 | HSPA1A    | heat shock 70kDa protein 1A [Source:HGNC Symbol;Acc:5232]                                    |
| 2367 | ENSG00000165813 | 1478.283184 | -0.756270186 | 0.101959912 | 9.45E-13 | C10orf118 | chromosome 10 open reading frame 118 [Source:HGNC Symbol;Acc:24349]                          |
| 2368 | ENSG00000135976 | 752.762157  | -1.143571879 | 0.154225497 | 9.62E-13 | ANKRD36   | ankyrin repeat domain 36 [Source:HGNC Symbol;Acc:24079]                                      |
| 2369 | ENSG00000137193 | 2916.011952 | 0.538750548  | 0.072669414 | 9.70E-13 | PIM1      | pim-1 oncogene [Source:HGNC Symbol;Acc:8986]                                                 |
| 2370 | ENSG00000155097 | 1412.712969 | -0.792863633 | 0.106960406 | 9.77E-13 | ATP6V1C1  | ATPase, H+ transporting, lysosomal 42kDa, V1 subunit C1 [Source:HGNC Symbol;Acc:856]         |
| 2371 | ENSG00000119707 | 8772.361836 | 0.454799335  | 0.061386312 | 1.01E-12 | RBM25     | RNA binding motif protein 25 [Source:HGNC Symbol;Acc:23244]                                  |
| 2372 | ENSG00000112297 | 3115.628112 | -0.553413758 | 0.074703442 | 1.01E-12 | AIM1      | absent in melanoma 1 [Source:HGNC Symbol;Acc:356]                                            |
| 2373 | ENSG00000176597 | 762.5454362 | -0.949028148 | 0.128204535 | 1.05E-12 | B3GNT5    | UDP-GlcNAc:betaGal beta-1,3-N-acetylglucosaminyltransferase 5 [Source:HGNC Symbol;Acc:15684] |
| 2374 | ENSG00000163600 | 141.7697958 | 2.159089104  | 0.291851851 | 1.09E-12 | ICOS      | inducible T-cell co-stimulator [Source:HGNC Symbol;Acc:5351]                                 |

|      |                 |             |              |             |          |         |                                                                                                                |
|------|-----------------|-------------|--------------|-------------|----------|---------|----------------------------------------------------------------------------------------------------------------|
| 2375 | ENSG00000198780 | 174.4365626 | 1.875691767  | 0.253561018 | 1.09E-12 | FAM169A | family with sequence similarity 169, member A [Source:HGNC Symbol;Acc:29138]                                   |
| 2376 | ENSG00000164930 | 232.8348988 | 1.685597742  | 0.22787904  | 1.10E-12 | FZD6    | frizzled family receptor 6 [Source:HGNC Symbol;Acc:4044]                                                       |
| 2377 | ENSG00000081307 | 903.2138832 | -0.823659472 | 0.111386231 | 1.12E-12 | UBA5    | ubiquitin-like modifier activating enzyme 5 [Source:HGNC Symbol;Acc:23230]                                     |
| 2378 | ENSG00000137965 | 923.6822021 | -1.01191759  | 0.136848786 | 1.12E-12 | IFI44   | interferon-induced protein 44 [Source:HGNC Symbol;Acc:16938]                                                   |
| 2379 | ENSG00000136802 | 426.0836868 | 1.365675058  | 0.18472878  | 1.13E-12 | LRRRC8A | leucine rich repeat containing 8 family, member A [Source:HGNC Symbol;Acc:19027]                               |
| 2380 | ENSG00000135114 | 464.1302233 | 1.141909993  | 0.154508632 | 1.15E-12 | OASL    | 2'-5'-oligoadenylate synthetase-like [Source:HGNC Symbol;Acc:8090]                                             |
| 2381 | ENSG00000173114 | 110.6520426 | 2.384032512  | 0.322610788 | 1.16E-12 | LRRN3   | leucine rich repeat neuronal 3 [Source:HGNC Symbol;Acc:17200]                                                  |
| 2382 | ENSG00000100345 | 35762.8997  | -0.489571939 | 0.066253678 | 1.16E-12 | MYH9    | myosin, heavy chain 9, non-muscle [Source:HGNC Symbol;Acc:7579]                                                |
| 2383 | ENSG00000163918 | 442.8295541 | -1.127986164 | 0.152668051 | 1.17E-12 | RFC4    | replication factor C (activator 1) 4, 37kDa [Source:HGNC Symbol;Acc:9972]                                      |
| 2384 | ENSG00000168286 | 449.1594143 | 1.135101272  | 0.153672326 | 1.18E-12 | THAP11  | THAP domain containing 11 [Source:HGNC Symbol;Acc:23194]                                                       |
| 2385 | ENSG00000157379 | 981.9473654 | -0.799597085 | 0.108259695 | 1.19E-12 | DHRS1   | dehydrogenase/reductase (SDR family) member 1 [Source:HGNC Symbol;Acc:16445]                                   |
| 2386 | ENSG00000143774 | 1813.436718 | 0.94464376   | 0.127932618 | 1.21E-12 | GUK1    | guanylate kinase 1 [Source:HGNC Symbol;Acc:4693]                                                               |
| 2387 | ENSG00000171241 | 249.1900429 | -1.719590678 | 0.232983787 | 1.23E-12 | SHCBP1  | SHC SH2-domain binding protein 1 [Source:HGNC Symbol;Acc:29547]                                                |
| 2388 | ENSG00000154928 | 277.0139888 | 1.613376195  | 0.218720301 | 1.27E-12 | EPHB1   | EPH receptor B1 [Source:HGNC Symbol;Acc:3392]                                                                  |
| 2389 | ENSG00000149527 | 249.0102379 | 1.925489401  | 0.261071521 | 1.28E-12 | PLCH2   | phospholipase C, eta 2 [Source:HGNC Symbol;Acc:29037]                                                          |
| 2390 | ENSG00000262407 | 360.687466  | -1.363149184 | 0.184839119 | 1.29E-12 | CCDC125 | coiled-coil domain containing 125 [Source:HGNC Symbol;Acc:28924]                                               |
| 2391 | ENSG00000138032 | 1880.074751 | -0.613483061 | 0.083186665 | 1.29E-12 | PPM1B   | protein phosphatase, Mg <sup>2+</sup> /Mn <sup>2+</sup> dependent, 1B [Source:HGNC Symbol;Acc:9276]            |
| 2392 | ENSG00000164023 | 212.9906883 | -2.004480972 | 0.271996533 | 1.34E-12 | SGMS2   | sphingomyelin synthase 2 [Source:HGNC Symbol;Acc:28395]                                                        |
| 2393 | ENSG00000147677 | 3268.053686 | 0.485937848  | 0.065950573 | 1.35E-12 | EIF3H   | eukaryotic translation initiation factor 3, subunit H [Source:HGNC Symbol;Acc:3273]                            |
| 2394 | ENSG00000263233 | 43.17273768 | 3.436522847  | 0.466638739 | 1.39E-12 | KIR2DS2 | killer cell immunoglobulin-like receptor, two domains, short cytoplasmic tail, 2 [Source:HGNC Symbol;Acc:6334] |
| 2395 | ENSG00000145390 | 301.436873  | 1.525357513  | 0.207203293 | 1.42E-12 | USP53   | ubiquitin specific peptidase 53 [Source:HGNC Symbol;Acc:29255]                                                 |
| 2396 | ENSG00000267841 | 98.39824893 | -2.264018966 | 0.30774335  | 1.47E-12 | GATA1   | GATA binding protein 1 (globin transcription factor 1) [Source:HGNC Symbol;Acc:4170]                           |
| 2397 | ENSG00000119969 | 459.4256293 | -1.282101176 | 0.174409812 | 1.53E-12 | HELLS   | helicase, lymphoid-specific [Source:HGNC Symbol;Acc:4861]                                                      |
| 2398 | ENSG00000154814 | 376.5022955 | 1.26527559   | 0.172145279 | 1.55E-12 | OXNAD1  | oxidoreductase NAD-binding domain containing 1 [Source:HGNC Symbol;Acc:25128]                                  |
| 2399 | ENSG00000237508 | 471.4503114 | 1.175321207  | 0.159909457 | 1.55E-12 | HLA-F   | major histocompatibility complex, class I, F [Source:HGNC Symbol;Acc:4963]                                     |
| 2400 | ENSG00000206509 | 471.4510039 | 1.175379145  | 0.159921008 | 1.55E-12 | HLA-F   | major histocompatibility complex, class I, F [Source:HGNC Symbol;Acc:4963]                                     |
| 2401 | ENSG00000090097 | 113.9700347 | 2.303364731  | 0.31347187  | 1.57E-12 | PCBP4   | poly(rC) binding protein 4 [Source:HGNC Symbol;Acc:8652]                                                       |
| 2402 | ENSG00000105352 | 1862.658696 | -0.628958771 | 0.085619959 | 1.59E-12 | CEACAM4 | carcinoembryonic antigen-related cell adhesion molecule 4 [Source:HGNC Symbol;Acc:1816]                        |

|      |                 |             |              |             |          |               |                                                                                                  |
|------|-----------------|-------------|--------------|-------------|----------|---------------|--------------------------------------------------------------------------------------------------|
| 2403 | ENSG00000183723 | 322.8343202 | -1.329917725 | 0.181085635 | 1.61E-12 | CMTM4         | CKLF-like MARVEL transmembrane domain containing 4 [Source:HGNC Symbol;Acc:19175]                |
| 2404 | ENSG00000151014 | 201.3345101 | -1.673335389 | 0.227935778 | 1.65E-12 | CCR4L         | CCR4 carbon catabolite repression 4-like ( <i>S. cerevisiae</i> ) [Source:HGNC Symbol;Acc:14254] |
| 2405 | ENSG00000142046 | 2046.365888 | -0.658457708 | 0.089715387 | 1.67E-12 | TMEM91        | transmembrane protein 91 [Source:HGNC Symbol;Acc:32393]                                          |
| 2406 | ENSG00000139044 | 176.5574976 | -1.837022758 | 0.250356613 | 1.69E-12 | B4GALNT3      | beta-1,4-N-acetyl-galactosaminyl transferase 3 [Source:HGNC Symbol;Acc:24137]                    |
| 2407 | ENSG00000188522 | 131.9271978 | 2.134586796  | 0.290991465 | 1.72E-12 | FAM83G        | family with sequence similarity 83, member G [Source:HGNC Symbol;Acc:32554]                      |
| 2408 | ENSG00000131797 | 168.8332947 | 1.88219736   | 0.256657517 | 1.74E-12 | CLUHP3        | clustered mitochondria (cluA/CLU1) homolog pseudogene 3 [Source:HGNC Symbol;Acc:28447]           |
| 2409 | ENSG00000047346 | 1446.194216 | 0.746965749  | 0.101896678 | 1.78E-12 | FAM214A       | family with sequence similarity 214, member A [Source:HGNC Symbol;Acc:25609]                     |
| 2410 | ENSG00000172819 | 202.8662336 | 1.805183378  | 0.246346203 | 1.82E-12 | RARG          | retinoic acid receptor, gamma [Source:HGNC Symbol;Acc:9866]                                      |
| 2411 | ENSG00000167900 | 268.6723547 | -1.617769793 | 0.220796334 | 1.83E-12 | TK1           | thymidine kinase 1, soluble [Source:HGNC Symbol;Acc:11830]                                       |
| 2412 | ENSG00000162063 | 215.1055516 | -1.580234655 | 0.215721546 | 1.85E-12 | CCNF          | cyclin F [Source:HGNC Symbol;Acc:1591]                                                           |
| 2413 | ENSG00000102145 | 98.87204465 | -2.237609893 | 0.30548427  | 1.86E-12 | GATA1         | GATA binding protein 1 (globin transcription factor 1) [Source:HGNC Symbol;Acc:4170]             |
| 2414 | ENSG00000081377 | 166.4945664 | 2.02434151   | 0.276379109 | 1.86E-12 | CDC14B        | cell division cycle 14B [Source:HGNC Symbol;Acc:1719]                                            |
| 2415 | ENSG00000102804 | 688.3790177 | 0.964981134  | 0.131752177 | 1.86E-12 | TSC22D1       | TSC22 domain family, member 1 [Source:HGNC Symbol;Acc:16826]                                     |
| 2416 | ENSG00000157191 | 1846.666707 | 0.610255862  | 0.083340596 | 1.89E-12 | NECAP2        | NECAP endocytosis associated 2 [Source:HGNC Symbol;Acc:25528]                                    |
| 2417 | ENSG00000008405 | 251.1325578 | 1.523010916  | 0.208028936 | 1.90E-12 | CRY1          | cryptochrome 1 (photolyase-like) [Source:HGNC Symbol;Acc:2384]                                   |
| 2418 | ENSG00000123360 | 611.6232675 | -1.020425389 | 0.139595004 | 2.07E-12 | PDE1B         | phosphodiesterase 1B, calmodulin-dependent [Source:HGNC Symbol;Acc:8775]                         |
| 2419 | ENSG00000225217 | 496.1019382 | 1.127178174  | 0.154201738 | 2.07E-12 | HSPA7         | heat shock 70kDa protein 7 (HSP70B) [Source:HGNC Symbol;Acc:5240]                                |
| 2420 | ENSG00000181472 | 526.3420448 | 1.090721434  | 0.149330603 | 2.16E-12 | ZBTB2         | zinc finger and BTB domain containing 2 [Source:HGNC Symbol;Acc:20868]                           |
| 2421 | ENSG00000264547 | 248.6891057 | -1.449385421 | 0.198512545 | 2.20E-12 | RP11-192H23.4 | Uncharacterized protein [Source:UniProtKB/TrEMBL;Acc:E9PMD0]                                     |
| 2422 | ENSG00000110108 | 626.7756464 | 0.949363278  | 0.130030509 | 2.21E-12 | TMEM109       | transmembrane protein 109 [Source:HGNC Symbol;Acc:28771]                                         |
| 2423 | ENSG00000211455 | 1821.652525 | -0.633562692 | 0.086851567 | 2.31E-12 | STK38L        | serine/threonine kinase 38 like [Source:HGNC Symbol;Acc:17848]                                   |
| 2424 | ENSG00000269666 | 3956.391905 | -0.479378939 | 0.065724055 | 2.33E-12 | PGK1          | phosphoglycerate kinase 1 [Source:HGNC Symbol;Acc:8896]                                          |
| 2425 | ENSG00000236409 | 123.6698687 | -2.045336248 | 0.280496404 | 2.36E-12 | NRADDP        | neurotrophin receptor associated death domain, pseudogene [Source:HGNC Symbol;Acc:19337]         |
| 2426 | ENSG00000102144 | 3957.011728 | -0.478974007 | 0.065711434 | 2.41E-12 | PGK1          | phosphoglycerate kinase 1 [Source:HGNC Symbol;Acc:8896]                                          |
| 2427 | ENSG00000143164 | 1088.040992 | -0.730886444 | 0.100279539 | 2.42E-12 | DCAF6         | DDB1 and CUL4 associated factor 6 [Source:HGNC Symbol;Acc:30002]                                 |
| 2428 | ENSG00000138433 | 1960.068444 | 0.643284362  | 0.08829543  | 2.47E-12 | CIR1          | corepressor interacting with RBPJ, 1 [Source:HGNC Symbol;Acc:24217]                              |
| 2429 | ENSG00000107201 | 1271.524471 | 0.694510567  | 0.095340431 | 2.49E-12 | DDX58         | DEAD (Asp-Glu-Ala-Asp) box polypeptide 58 [Source:HGNC Symbol;Acc:19102]                         |
| 2430 | ENSG00000198561 | 736.0206572 | -1.143520611 | 0.156980268 | 2.49E-12 | CTNND1        | catenin (cadherin-associated protein), delta 1 [Source:HGNC Symbol;Acc:2515]                     |

|      |                 |             |              |             |          |               |                                                                                                  |
|------|-----------------|-------------|--------------|-------------|----------|---------------|--------------------------------------------------------------------------------------------------|
| 2431 | ENSG00000154589 | 672.9387788 | 0.988877702  | 0.135762555 | 2.50E-12 | LY96          | lymphocyte antigen 96 [Source:HGNC Symbol;Acc:17156]                                             |
| 2432 | ENSG00000164512 | 206.1711376 | -1.641974749 | 0.225607119 | 2.61E-12 | ANKRD55       | ankyrin repeat domain 55 [Source:HGNC Symbol;Acc:25681]                                          |
| 2433 | ENSG00000152969 | 125.4530685 | 2.096575918  | 0.288076844 | 2.61E-12 | JAKMIP1       | janus kinase and microtubule interacting protein 1 [Source:HGNC Symbol;Acc:26460]                |
| 2434 | ENSG00000065613 | 2332.253792 | -0.62516333  | 0.085931794 | 2.66E-12 | SLK           | STE20-like kinase [Source:HGNC Symbol;Acc:11088]                                                 |
| 2435 | ENSG00000105173 | 135.3526528 | -2.05977222  | 0.283262287 | 2.73E-12 | CCNE1         | cyclin E1 [Source:HGNC Symbol;Acc:1589]                                                          |
| 2436 | ENSG00000183431 | 2882.691393 | -0.54012094  | 0.074310012 | 2.79E-12 | SF3A3         | splicing factor 3a, subunit 3, 60kDa [Source:HGNC Symbol;Acc:10767]                              |
| 2437 | ENSG00000184557 | 393.9444711 | -1.175535685 | 0.161730664 | 2.79E-12 | SOCS3         | suppressor of cytokine signaling 3 [Source:HGNC Symbol;Acc:19391]                                |
| 2438 | ENSG00000160613 | 3425.083699 | 0.528728947  | 0.07275504  | 2.82E-12 | PCSK7         | proprotein convertase subtilisin/kexin type 7 [Source:HGNC Symbol;Acc:8748]                      |
| 2439 | ENSG00000185880 | 838.4181146 | 0.948786055  | 0.130570521 | 2.83E-12 | TRIM69        | tripartite motif containing 69 [Source:HGNC Symbol;Acc:17857]                                    |
| 2440 | ENSG00000130703 | 2950.968492 | -0.529263949 | 0.072856345 | 2.87E-12 | OSBPL2        | oxysterol binding protein-like 2 [Source:HGNC Symbol;Acc:15761]                                  |
| 2441 | ENSG00000250138 | 924.8836915 | 0.972565555  | 0.133885103 | 2.88E-12 | RP11-848G14.5 |                                                                                                  |
| 2442 | ENSG00000134248 | 1927.09371  | -0.655200614 | 0.090215661 | 2.91E-12 | LAMTOR5       | late endosomal/lysosomal adaptor, MAPK and MTOR activator 5 [Source:HGNC Symbol;Acc:17955]       |
| 2443 | ENSG00000130787 | 490.5235767 | 1.266496099  | 0.174399891 | 2.92E-12 | HIP1R         | huntingtin interacting protein 1 related [Source:HGNC Symbol;Acc:18415]                          |
| 2444 | ENSG00000273316 | 406.2985478 | 1.354306982  | 0.186519877 | 2.94E-12 | MBOAT7        | membrane bound O-acyltransferase domain containing 7 [Source:HGNC Symbol;Acc:15505]              |
| 2445 | ENSG00000273130 | 406.2816672 | 1.354036531  | 0.186500578 | 2.96E-12 | MBOAT7        | membrane bound O-acyltransferase domain containing 7 [Source:HGNC Symbol;Acc:15505]              |
| 2446 | ENSG00000177666 | 4668.677061 | -1.255974313 | 0.173072219 | 3.03E-12 | PNPLA2        | patatin-like phospholipase domain containing 2 [Source:HGNC Symbol;Acc:30802]                    |
| 2447 | ENSG00000109674 | 128.7495434 | -2.019131861 | 0.278250564 | 3.04E-12 | NEIL3         | nei endonuclease VIII-like 3 (E. coli) [Source:HGNC Symbol;Acc:24573]                            |
| 2448 | ENSG00000186130 | 329.015455  | 1.400515962  | 0.193092308 | 3.11E-12 | ZBTB6         | zinc finger and BTB domain containing 6 [Source:HGNC Symbol;Acc:16764]                           |
| 2449 | ENSG00000259885 | 110.3352598 | 2.504355176  | 0.345291416 | 3.12E-12 | SH2B2         | SH2B adaptor protein 2 [Source:HGNC Symbol;Acc:17381]                                            |
| 2450 | ENSG00000125505 | 406.2132125 | 1.354201443  | 0.186716436 | 3.12E-12 | MBOAT7        | membrane bound O-acyltransferase domain containing 7 [Source:HGNC Symbol;Acc:15505]              |
| 2451 | ENSG00000172667 | 727.2188913 | 0.891323345  | 0.122897795 | 3.12E-12 | ZMAT3         | zinc finger, matrin-type 3 [Source:HGNC Symbol;Acc:29983]                                        |
| 2452 | ENSG00000228314 | 166.102262  | 1.988270815  | 0.274257689 | 3.19E-12 | CYP4F29P      | cytochrome P450, family 4, subfamily F, polypeptide 29, pseudogene [Source:HGNC Symbol;Acc:2647] |
| 2453 | ENSG00000272809 | 406.1504582 | 1.35149255   | 0.186433539 | 3.20E-12 | MBOAT7        | membrane bound O-acyltransferase domain containing 7 [Source:HGNC Symbol;Acc:15505]              |
| 2454 | ENSG00000273057 | 406.1549452 | 1.352779258  | 0.186650466 | 3.23E-12 | MBOAT7        | membrane bound O-acyltransferase domain containing 7 [Source:HGNC Symbol;Acc:15505]              |
| 2455 | ENSG00000132405 | 2810.539728 | 0.541983732  | 0.074781227 | 3.23E-12 | TBC1D14       | TBC1 domain family, member 14 [Source:HGNC Symbol;Acc:29246]                                     |
| 2456 | ENSG00000273470 | 406.1607071 | 1.352862985  | 0.186674332 | 3.24E-12 | MBOAT7        | membrane bound O-acyltransferase domain containing 7 [Source:HGNC Symbol;Acc:15505]              |
| 2457 | ENSG00000273446 | 406.1581415 | 1.352838712  | 0.186676132 | 3.25E-12 | MBOAT7        | membrane bound O-acyltransferase domain containing 7 [Source:HGNC Symbol;Acc:15505]              |
| 2458 | ENSG00000241386 | 108.8249088 | 2.259397242  | 0.31215721  | 3.47E-12 | HLA-DOB       | major histocompatibility complex, class II, DO beta [Source:HGNC Symbol;Acc:4937]                |

|      |                 |             |              |             |          |            |                                                                                                                      |
|------|-----------------|-------------|--------------|-------------|----------|------------|----------------------------------------------------------------------------------------------------------------------|
| 2459 | ENSG00000165682 | 577.8150495 | -1.011604739 | 0.139816895 | 3.54E-12 | CLEC1B     | C-type lectin domain family 1, member B [Source:HGNC Symbol;Acc:24356]                                               |
| 2460 | ENSG00000112796 | 81.30485173 | 2.682694154  | 0.370936334 | 3.61E-12 | ENPP5      | ectonucleotide pyrophosphatase/phosphodiesterase 5 (putative) [Source:HGNC Symbol;Acc:13717]                         |
| 2461 | ENSG00000213965 | 359.8687172 | -1.208057525 | 0.1670625   | 3.64E-12 | NUDT19     | nudix (nucleoside diphosphate linked moiety X)-type motif 19 [Source:HGNC Symbol;Acc:32036]                          |
| 2462 | ENSG00000100813 | 8009.917999 | -0.36309814  | 0.050225968 | 3.69E-12 | ACIN1      | apoptotic chromatin condensation inducer 1 [Source:HGNC Symbol;Acc:17066]                                            |
| 2463 | ENSG00000107789 | 352.9089898 | -1.235664411 | 0.170950019 | 3.72E-12 | MINPP1     | multiple inositol-polyphosphate phosphatase 1 [Source:HGNC Symbol;Acc:7102]                                          |
| 2464 | ENSG00000101004 | 48.85684432 | 3.194988582  | 0.442085678 | 3.75E-12 | NINL       | ninein-like [Source:HGNC Symbol;Acc:29163]                                                                           |
| 2465 | ENSG00000113319 | 231.8142674 | 1.656854593  | 0.229341964 | 3.82E-12 | RASGRF2    | Ras protein-specific guanine nucleotide-releasing factor 2 [Source:HGNC Symbol;Acc:9876]                             |
| 2466 | ENSG00000172057 | 1339.043393 | 0.775302613  | 0.107336736 | 3.86E-12 | ORMDL3     | ORM1-like 3 ( <i>S. cerevisiae</i> ) [Source:HGNC Symbol;Acc:16038]                                                  |
| 2467 | ENSG00000203799 | 122.7656377 | -2.427116406 | 0.33614605  | 3.93E-12 | CCDC162P   | coiled-coil domain containing 162, pseudogene [Source:HGNC Symbol;Acc:21565]                                         |
| 2468 | ENSG00000070214 | 1441.67398  | -0.738401705 | 0.102275157 | 3.95E-12 | SLC44A1    | solute carrier family 44 (choline transporter), member 1 [Source:HGNC Symbol;Acc:18798]                              |
| 2469 | ENSG00000144645 | 158.4785704 | 1.832460144  | 0.25382775  | 3.96E-12 | OSBPL10    | oxysterol binding protein-like 10 [Source:HGNC Symbol;Acc:16395]                                                     |
| 2470 | ENSG00000142731 | 269.0232472 | -1.572225539 | 0.21796409  | 4.14E-12 | PLK4       | polo-like kinase 4 [Source:HGNC Symbol;Acc:11397]                                                                    |
| 2471 | ENSG00000185278 | 3005.737002 | -0.508556974 | 0.070544734 | 4.27E-12 | ZBTB37     | zinc finger and BTB domain containing 37 [Source:HGNC Symbol;Acc:28365]                                              |
| 2472 | ENSG00000164307 | 2859.769916 | 0.572156994  | 0.079398787 | 4.36E-12 | ERAP1      | endoplasmic reticulum aminopeptidase 1 [Source:HGNC Symbol;Acc:18173]                                                |
| 2473 | ENSG00000110047 | 4826.968264 | -0.610577522 | 0.084758273 | 4.43E-12 | EHD1       | EH-domain containing 1 [Source:HGNC Symbol;Acc:3242]                                                                 |
| 2474 | ENSG00000143499 | 522.2279824 | 1.131079637  | 0.157023679 | 4.45E-12 | SMYD2      | SET and MYND domain containing 2 [Source:HGNC Symbol;Acc:20982]                                                      |
| 2475 | ENSG00000137101 | 298.3549938 | 1.347546267  | 0.187080814 | 4.45E-12 | CD72       | CD72 molecule [Source:HGNC Symbol;Acc:1696]                                                                          |
| 2476 | ENSG00000075218 | 229.645855  | -1.551803714 | 0.215466907 | 4.48E-12 | GTSE1      | G-2 and S-phase expressed 1 [Source:HGNC Symbol;Acc:13698]                                                           |
| 2477 | ENSG00000107341 | 3119.376512 | 0.489857832  | 0.068029283 | 4.53E-12 | UBE2R2     | ubiquitin-conjugating enzyme E2R 2 [Source:HGNC Symbol;Acc:19907]                                                    |
| 2478 | ENSG00000184271 | 256.9645973 | 1.494165852  | 0.207747327 | 4.81E-12 | POU6F1     | POU class 6 homeobox 1 [Source:HGNC Symbol;Acc:9224]                                                                 |
| 2479 | ENSG00000272876 | 342.4748682 | -1.254996498 | 0.174540264 | 4.88E-12 | AC243960.1 |                                                                                                                      |
| 2480 | ENSG00000168476 | 637.8206306 | -0.993320183 | 0.138326011 | 5.22E-12 | REEP4      | receptor accessory protein 4 [Source:HGNC Symbol;Acc:26176]                                                          |
| 2481 | ENSG00000176463 | 2315.200428 | -0.603066759 | 0.08399412  | 5.26E-12 | SLCO3A1    | solute carrier organic anion transporter family, member 3A1 [Source:HGNC Symbol;Acc:10952]                           |
| 2482 | ENSG00000156510 | 57.92806605 | 3.020585045  | 0.420818253 | 5.34E-12 | HKDC1      | hexokinase domain containing 1 [Source:HGNC Symbol;Acc:23302]                                                        |
| 2483 | ENSG00000104529 | 5743.744794 | 0.554035291  | 0.07719868  | 5.38E-12 | EEF1D      | eukaryotic translation elongation factor 1 delta (guanine nucleotide exchange protein) [Source:HGNC Symbol;Acc:3211] |
| 2484 | ENSG00000197146 | 2191.01422  | 0.563713614  | 0.07855059  | 5.39E-12 | AL133458.1 |                                                                                                                      |
| 2485 | ENSG00000165782 | 1673.321878 | 0.683179523  | 0.095202139 | 5.40E-12 | TMEM55B    | transmembrane protein 55B [Source:HGNC Symbol;Acc:19299]                                                             |
| 2486 | ENSG00000184785 | 34.03462216 | -3.520238737 | 0.490678696 | 5.47E-12 | SMIM10     | small integral membrane protein 10 [Source:HGNC Symbol;Acc:41913]                                                    |

|      |                 |             |              |             |          |               |                                                                                                           |
|------|-----------------|-------------|--------------|-------------|----------|---------------|-----------------------------------------------------------------------------------------------------------|
| 2487 | ENSG00000166979 | 105.0840713 | 2.479408591  | 0.345783147 | 5.63E-12 | EVA1C         | eva-1 homolog C (C. elegans) [Source:HGNC Symbol;Acc:13239]                                               |
| 2488 | ENSG00000135899 | 3073.461078 | 0.502910458  | 0.070142526 | 5.65E-12 | SP110         | SP110 nuclear body protein [Source:HGNC Symbol;Acc:5401]                                                  |
| 2489 | ENSG00000166170 | 869.3048964 | 0.833343589  | 0.116232737 | 5.65E-12 | BAG5          | BCL2-associated athanogene 5 [Source:HGNC Symbol;Acc:941]                                                 |
| 2490 | ENSG00000135077 | 256.7328462 | 1.583630423  | 0.220898455 | 5.68E-12 | HAVCR2        | hepatitis A virus cellular receptor 2 [Source:HGNC Symbol;Acc:18437]                                      |
| 2491 | ENSG00000035499 | 162.9050779 | -1.740513189 | 0.24293136  | 5.86E-12 | DEPDC1B       | DEP domain containing 1B [Source:HGNC Symbol;Acc:24902]                                                   |
| 2492 | ENSG00000121578 | 622.3887592 | -1.009883862 | 0.140965783 | 5.88E-12 | B4GALT4       | UDP-Gal:betaGlcNAc beta 1,4- galactosyltransferase, polypeptide 4 [Source:HGNC Symbol;Acc:927]            |
| 2493 | ENSG00000176624 | 839.8278346 | 0.829794521  | 0.115870828 | 6.00E-12 | MEX3C         | mex-3 RNA binding family member C [Source:HGNC Symbol;Acc:28040]                                          |
| 2494 | ENSG00000263304 | 596.4610518 | -0.971803363 | 0.135704588 | 6.00E-12 | MILR1         | mast cell immunoglobulin-like receptor 1 [Source:HGNC Symbol;Acc:27570]                                   |
| 2495 | ENSG00000235220 | 649.9821172 | 0.979587466  | 0.136817355 | 6.06E-12 | HLA-F         | major histocompatibility complex, class I, F [Source:HGNC Symbol;Acc:4963]                                |
| 2496 | ENSG00000141279 | 5400.190074 | -0.476667942 | 0.066587282 | 6.11E-12 | NPEPPS        | aminopeptidase puromycin sensitive [Source:HGNC Symbol;Acc:7900]                                          |
| 2497 | ENSG00000135736 | 53.15552152 | 3.34075398   | 0.467189946 | 6.47E-12 | CCDC102A      | coiled-coil domain containing 102A [Source:HGNC Symbol;Acc:28097]                                         |
| 2498 | ENSG00000163602 | 2337.18196  | 0.552583004  | 0.077337426 | 6.74E-12 | RYBP          | RING1 and YY1 binding protein [Source:HGNC Symbol;Acc:10480]                                              |
| 2499 | ENSG00000163864 | 83.51478755 | -2.567719084 | 0.359454972 | 6.82E-12 | NMNAT3        | nicotinamide nucleotide adenyltransferase 3 [Source:HGNC Symbol;Acc:20989]                                |
| 2500 | ENSG00000171502 | 68.77977192 | 2.689324744  | 0.376493887 | 6.83E-12 | COL24A1       | collagen, type XXIV, alpha 1 [Source:HGNC Symbol;Acc:20821]                                               |
| 2501 | ENSG00000170893 | 29.29162865 | 3.795322959  | 0.531387319 | 6.87E-12 | TRH           | thyrotropin-releasing hormone [Source:HGNC Symbol;Acc:12298]                                              |
| 2502 | ENSG00000197971 | 5312.440181 | 0.422603158  | 0.059173544 | 6.89E-12 | MBP           | myelin basic protein [Source:HGNC Symbol;Acc:6925]                                                        |
| 2503 | ENSG00000132357 | 1023.506976 | -0.758968808 | 0.106332899 | 7.10E-12 | CARD6         | caspase recruitment domain family, member 6 [Source:HGNC Symbol;Acc:16394]                                |
| 2504 | ENSG00000163162 | 9268.903913 | 0.387785286  | 0.054332373 | 7.11E-12 | RNF149        | ring finger protein 149 [Source:HGNC Symbol;Acc:23137]                                                    |
| 2505 | ENSG00000131196 | 360.7739136 | 1.295715634  | 0.181646167 | 7.33E-12 | NFATC1        | nuclear factor of activated T-cells, cytoplasmic, calcineurin-dependent 1 [Source:HGNC Symbol;Acc:7775]   |
| 2506 | ENSG00000183291 | 1817.447676 | 0.706496714  | 0.099083237 | 7.48E-12 | SEP15         | Homo sapiens 15 kDa selenoprotein (SEP15), transcript variant 2, mRNA. [Source:RefSeq mRNA;Acc:NM_203341] |
| 2507 | ENSG00000008226 | 362.7910038 | -1.240056954 | 0.17396396  | 7.59E-12 | DLEC1         | deleted in lung and esophageal cancer 1 [Source:HGNC Symbol;Acc:2899]                                     |
| 2508 | ENSG00000067369 | 743.0430531 | 0.936533857  | 0.131433101 | 7.73E-12 | TP53BP1       | tumor protein p53 binding protein 1 [Source:HGNC Symbol;Acc:11999]                                        |
| 2509 | ENSG00000198589 | 851.2829527 | 0.911154414  | 0.127978246 | 8.07E-12 | LRBA          | LPS-responsive vesicle trafficking, beach and anchor containing [Source:HGNC Symbol;Acc:1742]             |
| 2510 | ENSG00000266714 | 6895.745766 | -0.639779512 | 0.089866813 | 8.09E-12 | MYO15B        | myosin XVb pseudogene [Source:HGNC Symbol;Acc:14083]                                                      |
| 2511 | ENSG00000108509 | 2495.195187 | -0.609573549 | 0.085635496 | 8.15E-12 | CAMTA2        | calmodulin binding transcription activator 2 [Source:HGNC Symbol;Acc:18807]                               |
| 2512 | ENSG00000092439 | 1257.120424 | 0.731358732  | 0.102785687 | 8.31E-12 | TRPM7         | transient receptor potential cation channel, subfamily M, member 7 [Source:HGNC Symbol;Acc:17994]         |
| 2513 | ENSG00000256594 | 696.7007935 | 0.985768844  | 0.138581217 | 8.44E-12 | RP11-705C15.2 |                                                                                                           |
| 2514 | ENSG00000163362 | 199.5685044 | -1.684972152 | 0.236920627 | 8.52E-12 | C1orf106      | chromosome 1 open reading frame 106 [Source:HGNC Symbol;Acc:25599]                                        |



|      |                 |             |              |             |          |           |                                                                                                                  |
|------|-----------------|-------------|--------------|-------------|----------|-----------|------------------------------------------------------------------------------------------------------------------|
| 2515 | ENSG00000233750 | 575.8579786 | -0.990310751 | 0.139285453 | 8.64E-12 | CICP27    | capicua transcriptional repressor pseudogene 27 [Source:HGNC Symbol;Acc:48835]                                   |
| 2516 | ENSG00000174371 | 111.7420984 | -2.508629415 | 0.352890366 | 8.71E-12 | EXO1      | exonuclease 1 [Source:HGNC Symbol;Acc:3511]                                                                      |
| 2517 | ENSG00000187951 | 431.9958773 | -1.190731241 | 0.167526503 | 8.77E-12 | ARHGAP11B | Rho GTPase activating protein 11B [Source:HGNC Symbol;Acc:15782]                                                 |
| 2518 | ENSG00000227191 | 666.4551687 | 0.89741434   | 0.126373064 | 9.18E-12 | TRGC2     | T cell receptor gamma constant 2 [Source:HGNC Symbol;Acc:12276]                                                  |
| 2519 | ENSG00000108840 | 2049.932444 | 0.782596715  | 0.110268539 | 9.46E-12 | HDAC5     | histone deacetylase 5 [Source:HGNC Symbol;Acc:14068]                                                             |
| 2520 | ENSG00000152760 | 312.7332726 | -1.300644433 | 0.18344192  | 9.94E-12 | TCTEX1D1  | Tctex1 domain containing 1 [Source:HGNC Symbol;Acc:26882]                                                        |
| 2521 | ENSG00000125898 | 519.9267608 | 1.019538525  | 0.143917424 | 1.04E-11 | FAM110A   | family with sequence similarity 110, member A [Source:HGNC Symbol;Acc:16188]                                     |
| 2522 | ENSG00000166963 | 93.12999161 | 2.258052731  | 0.318762876 | 1.04E-11 | MAP1A     | microtubule-associated protein 1A [Source:HGNC Symbol;Acc:6835]                                                  |
| 2523 | ENSG00000204116 | 209.4481826 | 1.724420246  | 0.243434918 | 1.04E-11 | CHIC1     | cysteine-rich hydrophobic domain 1 [Source:HGNC Symbol;Acc:1934]                                                 |
| 2524 | ENSG00000113240 | 2906.738318 | -0.540407033 | 0.0762906   | 1.04E-11 | CLK4      | CDC-like kinase 4 [Source:HGNC Symbol;Acc:13659]                                                                 |
| 2525 | ENSG00000271447 | 29.93724531 | 3.798836533  | 0.53641839  | 1.05E-11 | MMP28     | Homo sapiens matrix metalloproteinase 28 (MMP28), transcript variant 1, mRNA. [Source:RefSeq mRNA;Acc:NM_024302] |
| 2526 | ENSG00000152409 | 309.1549145 | 1.320234314  | 0.186462171 | 1.06E-11 | JMY       | junction mediating and regulatory protein, p53 cofactor [Source:HGNC Symbol;Acc:28916]                           |
| 2527 | ENSG00000143669 | 13879.05498 | -0.424144699 | 0.059917638 | 1.08E-11 | LYST      | lysosomal trafficking regulator [Source:HGNC Symbol;Acc:1968]                                                    |
| 2528 | ENSG00000141664 | 1576.098698 | 0.628035834  | 0.088735588 | 1.09E-11 | ZCCHC2    | zinc finger, CCHC domain containing 2 [Source:HGNC Symbol;Acc:22916]                                             |
| 2529 | ENSG00000158773 | 2841.867734 | 0.529501115  | 0.074836435 | 1.10E-11 | USF1      | upstream transcription factor 1 [Source:HGNC Symbol;Acc:12593]                                                   |
| 2530 | ENSG00000129933 | 3458.142508 | -0.591354789 | 0.08359666  | 1.11E-11 | MAU2      | MAU2 sister chromatid cohesion factor [Source:HGNC Symbol;Acc:29140]                                             |
| 2531 | ENSG00000113532 | 1753.378791 | 0.611902215  | 0.086565907 | 1.16E-11 | ST8SIA4   | ST8 alpha-N-acetyl-neuraminide alpha-2,8-sialyltransferase 4 [Source:HGNC Symbol;Acc:10871]                      |
| 2532 | ENSG00000224383 | 85.85946439 | 2.522146198  | 0.35693853  | 1.18E-11 | C17orf72  | chromosome 17 open reading frame 72 [Source:HGNC Symbol;Acc:25673]                                               |
| 2533 | ENSG00000133169 | 332.3267467 | -1.286821192 | 0.182123599 | 1.18E-11 | BEX1      | brain expressed, X-linked 1 [Source:HGNC Symbol;Acc:1036]                                                        |
| 2534 | ENSG00000182224 | 353.2226649 | -1.222216296 | 0.172998569 | 1.19E-11 | CYB5D1    | cytochrome b5 domain containing 1 [Source:HGNC Symbol;Acc:26516]                                                 |
| 2535 | ENSG00000069424 | 5627.979231 | -0.547269569 | 0.077469267 | 1.19E-11 | KCNAB2    | potassium voltage-gated channel, shaker-related subfamily, beta member 2 [Source:HGNC Symbol;Acc:6229]           |
| 2536 | ENSG00000101384 | 325.7070758 | -1.253183805 | 0.177443901 | 1.21E-11 | JAG1      | jagged 1 [Source:HGNC Symbol;Acc:6188]                                                                           |
| 2537 | ENSG00000086200 | 350.6662468 | 1.314320752  | 0.186151248 | 1.22E-11 | IPO11     | importin 11 [Source:HGNC Symbol;Acc:20628]                                                                       |
| 2538 | ENSG00000108107 | 7914.246638 | 1.0267516    | 0.145440411 | 1.23E-11 | RPL28     | ribosomal protein L28 [Source:HGNC Symbol;Acc:10330]                                                             |
| 2539 | ENSG00000257242 | 217.6264178 | -1.548348185 | 0.219356652 | 1.24E-11 | C12orf79  | chromosome 12 open reading frame 79 [Source:HGNC Symbol;Acc:27409]                                               |
| 2540 | ENSG00000180628 | 1021.312473 | 0.927825579  | 0.131458436 | 1.25E-11 | PCGF5     | polycomb group ring finger 5 [Source:HGNC Symbol;Acc:28264]                                                      |
| 2541 | ENSG00000173812 | 18999.26457 | -0.321425215 | 0.045581788 | 1.30E-11 | EIF1      | eukaryotic translation initiation factor 1 [Source:HGNC Symbol;Acc:3249]                                         |
| 2542 | ENSG00000153933 | 452.7130258 | 1.176112656  | 0.166793251 | 1.30E-11 | DGKE      | diacylglycerol kinase, epsilon 64kDa [Source:HGNC Symbol;Acc:2852]                                               |

|      |                 |             |              |             |          |                |                                                                                                     |
|------|-----------------|-------------|--------------|-------------|----------|----------------|-----------------------------------------------------------------------------------------------------|
| 2543 | ENSG00000054965 | 2957.134682 | -0.538420839 | 0.076381916 | 1.33E-11 | FAM168A        | family with sequence similarity 168, member A [Source:HGNC Symbol;Acc:28999]                        |
| 2544 | ENSG00000170037 | 948.6081405 | -0.789449061 | 0.111999403 | 1.33E-11 | CNTROB         | centrobin, centrosomal BRCA2 interacting protein [Source:HGNC Symbol;Acc:29616]                     |
| 2545 | ENSG00000185128 | 874.1024747 | -0.873406943 | 0.123929641 | 1.34E-11 | TBC1D3F        | TBC1 domain family, member 3F [Source:HGNC Symbol;Acc:18257]                                        |
| 2546 | ENSG00000121895 | 252.764869  | 1.5171444    | 0.21528491  | 1.34E-11 | TMEM156        | transmembrane protein 156 [Source:HGNC Symbol;Acc:26260]                                            |
| 2547 | ENSG00000175115 | 4102.454118 | 0.529340524  | 0.075154397 | 1.38E-11 | PACS1          | phosphofurin acidic cluster sorting protein 1 [Source:HGNC Symbol;Acc:30032]                        |
| 2548 | ENSG00000167549 | 72.10809769 | 2.754502454  | 0.391145893 | 1.39E-11 | CORO6          | coronin 6 [Source:HGNC Symbol;Acc:21356]                                                            |
| 2549 | ENSG00000188486 | 411.3744701 | -1.132333905 | 0.160825144 | 1.40E-11 | H2AFX          | H2A histone family, member X [Source:HGNC Symbol;Acc:4739]                                          |
| 2550 | ENSG00000059728 | 24666.27201 | -0.352181665 | 0.050035656 | 1.42E-11 | MXD1           | MAX dimerization protein 1 [Source:HGNC Symbol;Acc:6761]                                            |
| 2551 | ENSG00000005448 | 147.7979211 | 1.896007534  | 0.269423631 | 1.44E-11 | WDR54          | WD repeat domain 54 [Source:HGNC Symbol;Acc:25770]                                                  |
| 2552 | ENSG00000154265 | 957.7743145 | -0.799962969 | 0.113705537 | 1.46E-11 | ABCA5          | ATP-binding cassette, sub-family A (ABC1), member 5 [Source:HGNC Symbol;Acc:35]                     |
| 2553 | ENSG00000122641 | 563.0163089 | -0.965435546 | 0.137247798 | 1.47E-11 | INHBA          | inhibin, beta A [Source:HGNC Symbol;Acc:6066]                                                       |
| 2554 | ENSG00000162302 | 426.3827911 | 1.226457945  | 0.174385225 | 1.48E-11 | RPS6KA4        | ribosomal protein S6 kinase, 90kDa, polypeptide 4 [Source:HGNC Symbol;Acc:10433]                    |
| 2555 | ENSG00000137145 | 935.1212155 | 0.857225002  | 0.121887218 | 1.48E-11 | DENND4C        | DENN/MADD domain containing 4C [Source:HGNC Symbol;Acc:26079]                                       |
| 2556 | ENSG00000164535 | 1023.157806 | -0.752636364 | 0.107106187 | 1.54E-11 | DAGLB          | diacylglycerol lipase, beta [Source:HGNC Symbol;Acc:28923]                                          |
| 2557 | ENSG00000198369 | 179.1759229 | -1.967181345 | 0.279949063 | 1.55E-11 | SPRED2         | sprouty-related, EVH1 domain containing 2 [Source:HGNC Symbol;Acc:17722]                            |
| 2558 | ENSG00000144791 | 1023.39968  | 0.748964064  | 0.106590965 | 1.55E-11 | LIMD1          | LIM domains containing 1 [Source:HGNC Symbol;Acc:6612]                                              |
| 2559 | ENSG00000136167 | 58130.23122 | -0.315835013 | 0.044960889 | 1.57E-11 | LCP1           | lymphocyte cytosolic protein 1 (L-plastin) [Source:HGNC Symbol;Acc:6528]                            |
| 2560 | ENSG00000167483 | 994.1771026 | 0.826053965  | 0.117601843 | 1.57E-11 | FAM129C        | family with sequence similarity 129, member C [Source:HGNC Symbol;Acc:24130]                        |
| 2561 | ENSG00000110315 | 3160.759036 | -0.522540219 | 0.074400216 | 1.58E-11 | RNF141         | ring finger protein 141 [Source:HGNC Symbol;Acc:21159]                                              |
| 2562 | ENSG00000182487 | 3296.641608 | -0.586311452 | 0.083483405 | 1.59E-11 | NCF1B          | neutrophil cytosolic factor 1B pseudogene [Source:HGNC Symbol;Acc:32522]                            |
| 2563 | ENSG00000262984 | 3296.642924 | -0.586314179 | 0.08348501  | 1.59E-11 | NCF1B          | neutrophil cytosolic factor 1B pseudogene [Source:HGNC Symbol;Acc:32522]                            |
| 2564 | ENSG00000111674 | 262.8922093 | 1.55260218   | 0.221142379 | 1.61E-11 | ENO2           | enolase 2 (gamma, neuronal) [Source:HGNC Symbol;Acc:3353]                                           |
| 2565 | ENSG00000186204 | 269.2290239 | -1.405447685 | 0.200185344 | 1.61E-11 | CYP4F12        | cytochrome P450, family 4, subfamily F, polypeptide 12 [Source:HGNC Symbol;Acc:18857]               |
| 2566 | ENSG00000022277 | 3782.125451 | -0.458247627 | 0.065273799 | 1.61E-11 | RTFDC1         | replication termination factor 2 domain containing 1 [Source:HGNC Symbol;Acc:15890]                 |
| 2567 | ENSG00000168792 | 302.582067  | 1.314965137  | 0.18734445  | 1.63E-11 | ABHD15         | abhydrolase domain containing 15 [Source:HGNC Symbol;Acc:26971]                                     |
| 2568 | ENSG00000269528 | 262.7376761 | 1.552419031  | 0.221216353 | 1.64E-11 | ENO2           | enolase 2 (gamma, neuronal) [Source:HGNC Symbol;Acc:3353]                                           |
| 2569 | ENSG00000267369 | 155.6286794 | 1.849009053  | 0.263614578 | 1.69E-11 | RP11-1094M14.8 |                                                                                                     |
| 2570 | ENSG00000163956 | 1806.163752 | -0.789352776 | 0.112572206 | 1.71E-11 | LRPAP1         | low density lipoprotein receptor-related protein associated protein 1 [Source:HGNC Symbol;Acc:6701] |

|      |                 |             |              |             |          |               |                                                                                                                 |
|------|-----------------|-------------|--------------|-------------|----------|---------------|-----------------------------------------------------------------------------------------------------------------|
| 2571 | ENSG00000101109 | 7861.561953 | 0.383278594  | 0.054672577 | 1.73E-11 | STK4          | serine/threonine kinase 4 [Source:HGNC Symbol;Acc:11408]                                                        |
| 2572 | ENSG00000168769 | 4950.632082 | -0.44629022  | 0.063689956 | 1.77E-11 | TET2          | tet methylcytosine dioxygenase 2 [Source:HGNC Symbol;Acc:25941]                                                 |
| 2573 | ENSG00000164414 | 1092.564697 | -0.741410487 | 0.105817517 | 1.78E-11 | SLC35A1       | solute carrier family 35 (CMP-sialic acid transporter), member A1 [Source:HGNC Symbol;Acc:11021]                |
| 2574 | ENSG00000163466 | 20242.79061 | -0.38288657  | 0.054648287 | 1.78E-11 | ARPC2         | actin related protein 2/3 complex, subunit 2, 34kDa [Source:HGNC Symbol;Acc:705]                                |
| 2575 | ENSG00000188549 | 326.1249365 | -1.233786342 | 0.17612692  | 1.79E-11 | C15orf52      | chromosome 15 open reading frame 52 [Source:HGNC Symbol;Acc:33488]                                              |
| 2576 | ENSG00000273047 | 74.48702686 | 2.80813008   | 0.4011373   | 1.85E-11 | RP4-583P15.14 |                                                                                                                 |
| 2577 | ENSG00000262897 | 44.86758593 | 3.350587964  | 0.478701186 | 1.87E-11 | KIR3DL2       | killer cell immunoglobulin-like receptor, three domains, long cytoplasmic tail, 2 [Source:HGNC Symbol;Acc:6339] |
| 2578 | ENSG00000186115 | 173.5453331 | -1.741974931 | 0.248882247 | 1.87E-11 | CYP4F2        | cytochrome P450, family 4, subfamily F, polypeptide 2 [Source:HGNC Symbol;Acc:2645]                             |
| 2579 | ENSG00000162852 | 777.8346746 | 0.84615131   | 0.120964271 | 1.92E-11 | CNST          | consortin, connexin sorting protein [Source:HGNC Symbol;Acc:26486]                                              |
| 2580 | ENSG00000261052 | 1712.755211 | -0.717389753 | 0.102566582 | 1.93E-11 | SULT1A3       | sulfotransferase family, cytosolic, 1A, phenol-preferring, member 3 [Source:HGNC Symbol;Acc:11455]              |
| 2581 | ENSG00000164161 | 63.74009761 | 3.292511795  | 0.470806007 | 1.95E-11 | HHIP          | hedgehog interacting protein [Source:HGNC Symbol;Acc:14866]                                                     |
| 2582 | ENSG00000137449 | 1644.124165 | -0.628800279 | 0.08996474  | 2.00E-11 | CPEB2         | cytoplasmic polyadenylation element binding protein 2 [Source:HGNC Symbol;Acc:21745]                            |
| 2583 | ENSG00000211747 | 99.62039179 | 2.40092485   | 0.343629967 | 2.04E-11 | TRBV20-1      | T cell receptor beta variable 20-1 [Source:HGNC Symbol;Acc:12196]                                               |
| 2584 | ENSG00000087495 | 99.63865874 | -2.190668531 | 0.313598084 | 2.05E-11 | PHACTR3       | phosphatase and actin regulator 3 [Source:HGNC Symbol;Acc:15833]                                                |
| 2585 | ENSG00000182646 | 507.490905  | -1.077290003 | 0.154233577 | 2.07E-11 | FAM156A       | family with sequence similarity 156, member A [Source:HGNC Symbol;Acc:30114]                                    |
| 2586 | ENSG00000140545 | 142.7221089 | 1.881930994  | 0.269442212 | 2.07E-11 | MFGE8         | milk fat globule-EGF factor 8 protein [Source:HGNC Symbol;Acc:7036]                                             |
| 2587 | ENSG00000164327 | 3998.399413 | 0.520689967  | 0.074553077 | 2.07E-11 | RICTOR        | RPTOR independent companion of MTOR, complex 2 [Source:HGNC Symbol;Acc:28611]                                   |
| 2588 | ENSG00000109790 | 365.0230165 | 1.226725724  | 0.175681838 | 2.09E-11 | KLHL5         | kelch-like family member 5 [Source:HGNC Symbol;Acc:6356]                                                        |
| 2589 | ENSG00000111203 | 610.0979047 | 1.042230251  | 0.149307147 | 2.13E-11 | ITFG2         | integrin alpha FG-GAP repeat containing 2 [Source:HGNC Symbol;Acc:30879]                                        |
| 2590 | ENSG00000265277 | 288.6408908 | -1.296028145 | 0.18572382  | 2.16E-11 | ACP6          | Lysophosphatidic acid phosphatase type 6 [Source:UniProtKB/Swiss-Prot;Acc:Q9NPH0]                               |
| 2591 | ENSG00000104921 | 287.7242799 | 1.333628857  | 0.191132383 | 2.17E-11 | FCER2         | Fc fragment of IgE, low affinity II, receptor for (CD23) [Source:HGNC Symbol;Acc:3612]                          |
| 2592 | ENSG00000135506 | 10162.47912 | -0.367770684 | 0.05271467  | 2.18E-11 | OS9           | osteosarcoma amplified 9, endoplasmic reticulum lectin [Source:HGNC Symbol;Acc:16994]                           |
| 2593 | ENSG00000094975 | 1594.292163 | -0.655655425 | 0.093996248 | 2.20E-11 | SUCO          | SUN domain containing ossification factor [Source:HGNC Symbol;Acc:1240]                                         |
| 2594 | ENSG00000174123 | 653.1895337 | 1.014330508  | 0.145434057 | 2.21E-11 | TLR10         | toll-like receptor 10 [Source:HGNC Symbol;Acc:15634]                                                            |
| 2595 | ENSG00000149503 | 333.8181398 | -1.215863382 | 0.174350809 | 2.23E-11 | INCENP        | inner centromere protein antigens 135/155kDa [Source:HGNC Symbol;Acc:6058]                                      |
| 2596 | ENSG00000073350 | 284.4296738 | 1.716844727  | 0.246227263 | 2.24E-11 | LLGL2         | lethal giant larvae homolog 2 (Drosophila) [Source:HGNC Symbol;Acc:6629]                                        |
| 2597 | ENSG00000125817 | 457.319081  | 1.134461614  | 0.16278485  | 2.30E-11 | CENPB         | centromere protein B, 80kDa [Source:HGNC Symbol;Acc:1852]                                                       |
| 2598 | ENSG00000183624 | 836.7924137 | 0.80266408   | 0.115176595 | 2.30E-11 | HMCES         | 5-hydroxymethylcytosine (hmC) binding, ES cell-specific [Source:HGNC Symbol;Acc:24446]                          |

|      |                 |             |              |             |          |             |                                                                                                                                  |
|------|-----------------|-------------|--------------|-------------|----------|-------------|----------------------------------------------------------------------------------------------------------------------------------|
| 2599 | ENSG00000088205 | 1177.871206 | 0.72618961   | 0.104216628 | 2.31E-11 | DDX18       | DEAD (Asp-Glu-Ala-Asp) box polypeptide 18 [Source:HGNC Symbol;Acc:2741]                                                          |
| 2600 | ENSG00000099875 | 4631.830627 | 0.523855557  | 0.075190792 | 2.33E-11 | MKNK2       | MAP kinase interacting serine/threonine kinase 2 [Source:HGNC Symbol;Acc:7111]                                                   |
| 2601 | ENSG00000108669 | 7272.737529 | 0.368672049  | 0.052920302 | 2.34E-11 | CYTH1       | cytohesin 1 [Source:HGNC Symbol;Acc:9501]                                                                                        |
| 2602 | ENSG00000136630 | 996.7461521 | -0.913650521 | 0.13115216  | 2.34E-11 | HLX         | H2.0-like homeobox [Source:HGNC Symbol;Acc:4978]                                                                                 |
| 2603 | ENSG00000167766 | 1205.38511  | 0.701154751  | 0.100650376 | 2.34E-11 | ZNF83       | zinc finger protein 83 [Source:HGNC Symbol;Acc:13158]                                                                            |
| 2604 | ENSG00000158050 | 307.001589  | 1.35208029   | 0.194108808 | 2.35E-11 | DUSP2       | dual specificity phosphatase 2 [Source:HGNC Symbol;Acc:3068]                                                                     |
| 2605 | ENSG00000116711 | 130.4387364 | -1.949634666 | 0.279920147 | 2.36E-11 | PLA2G4A     | phospholipase A2, group IVA (cytosolic, calcium-dependent) [Source:HGNC Symbol;Acc:9035]                                         |
| 2606 | ENSG00000205038 | 25.72112319 | 3.613637366  | 0.518932657 | 2.38E-11 | PKHD1L1     | polycystic kidney and hepatic disease 1 (autosomal recessive)-like 1 [Source:HGNC Symbol;Acc:20313]                              |
| 2607 | ENSG00000133943 | 2536.941926 | 0.530484683  | 0.076199081 | 2.41E-11 | C14orf159   | chromosome 14 open reading frame 159 [Source:HGNC Symbol;Acc:20498]                                                              |
| 2608 | ENSG00000243696 | 647.18868   | -0.964191553 | 0.138512434 | 2.42E-11 | RP5-966M1.6 | Musculoskeletal embryonic nuclear protein 1 [Source:UniProtKB/TrEMBL;Acc:D6R8Y8]                                                 |
| 2609 | ENSG00000105755 | 596.7701111 | -0.923197766 | 0.132717172 | 2.51E-11 | ETHE1       | ethylmalonic encephalopathy 1 [Source:HGNC Symbol;Acc:23287]                                                                     |
| 2610 | ENSG00000120727 | 3065.265019 | 0.47482393   | 0.068346075 | 2.67E-11 | PAIP2       | poly(A) binding protein interacting protein 2 [Source:HGNC Symbol;Acc:17970]                                                     |
| 2611 | ENSG00000162511 | 35205.59358 | 0.297369867  | 0.042830317 | 2.75E-11 | LAPTM5      | lysosomal protein transmembrane 5 [Source:HGNC Symbol;Acc:29612]                                                                 |
| 2612 | ENSG00000077254 | 2059.426805 | -0.630965552 | 0.090907824 | 2.80E-11 | USP33       | ubiquitin specific peptidase 33 [Source:HGNC Symbol;Acc:20059]                                                                   |
| 2613 | ENSG00000213443 | 420.3079064 | 1.139139018  | 0.164140279 | 2.81E-11 | RP11-75L1.2 |                                                                                                                                  |
| 2614 | ENSG00000136731 | 2912.18915  | -0.575982785 | 0.082996205 | 2.81E-11 | UGGT1       | UDP-glucose glycoprotein glucosyltransferase 1 [Source:HGNC Symbol;Acc:15663]                                                    |
| 2615 | ENSG00000106537 | 299.3231095 | 1.259617972  | 0.181509117 | 2.81E-11 | TSPAN13     | tetraspanin 13 [Source:HGNC Symbol;Acc:21643]                                                                                    |
| 2616 | ENSG00000121210 | 2962.911585 | -0.506618077 | 0.073059719 | 2.92E-11 | KIAA0922    | KIAA0922 [Source:HGNC Symbol;Acc:29146]                                                                                          |
| 2617 | ENSG00000111729 | 1807.480417 | -0.641429859 | 0.092511336 | 2.94E-11 | CLEC4A      | C-type lectin domain family 4, member A [Source:HGNC Symbol;Acc:13257]                                                           |
| 2618 | ENSG00000160445 | 1129.600051 | 0.750344906  | 0.108227138 | 2.94E-11 | ZER1        | zyg-11 related, cell cycle regulator [Source:HGNC Symbol;Acc:30960]                                                              |
| 2619 | ENSG00000106799 | 3114.03209  | -0.530335587 | 0.076535195 | 3.02E-11 | TGFBR1      | transforming growth factor, beta receptor 1 [Source:HGNC Symbol;Acc:11772]                                                       |
| 2620 | ENSG00000089737 | 2249.911118 | 0.554635306  | 0.080071084 | 3.08E-11 | DDX24       | DEAD (Asp-Glu-Ala-Asp) box helicase 24 [Source:HGNC Symbol;Acc:13266]                                                            |
| 2621 | ENSG00000100225 | 3430.257128 | 0.446826606  | 0.064523045 | 3.11E-11 | FBXO7       | F-box protein 7 [Source:HGNC Symbol;Acc:13586]                                                                                   |
| 2622 | ENSG00000087085 | 24.8179563  | -3.684766803 | 0.532246638 | 3.15E-11 | ACHE        | acetylcholinesterase (Yt blood group) [Source:HGNC Symbol;Acc:108]                                                               |
| 2623 | ENSG00000150991 | 46679.49595 | -0.314806604 | 0.045485768 | 3.20E-11 | UBC         | ubiquitin C [Source:HGNC Symbol;Acc:12468]                                                                                       |
| 2624 | ENSG00000158555 | 309.0417097 | 1.421388143  | 0.205404875 | 3.22E-11 | GDPD5       | glycerophosphodiester phosphodiesterase domain containing 5 [Source:HGNC Symbol;Acc:28804]                                       |
| 2625 | ENSG00000086062 | 2828.874095 | 0.48370212   | 0.069901037 | 3.22E-11 | B4GALT1     | UDP-Gal:betaGlcNAc beta 1,4- galactosyltransferase, polypeptide 1 [Source:HGNC Symbol;Acc:924]                                   |
| 2626 | ENSG00000173473 | 1662.170262 | 0.650855271  | 0.094103903 | 3.30E-11 | SMARCC1     | SWI/SNF related, matrix associated, actin dependent regulator of chromatin, subfamily c, member 1 [Source:HGNC Symbol;Acc:11104] |

|      |                 |             |              |             |          |           |                                                                                         |
|------|-----------------|-------------|--------------|-------------|----------|-----------|-----------------------------------------------------------------------------------------|
| 2627 | ENSG00000039319 | 2414.805814 | -0.704328604 | 0.101844335 | 3.32E-11 | ZFYVE16   | zinc finger, FYVE domain containing 16 [Source:HGNC Symbol;Acc:20756]                   |
| 2628 | ENSG00000171206 | 1076.532597 | 0.747406885  | 0.108147135 | 3.43E-11 | TRIM8     | tripartite motif containing 8 [Source:HGNC Symbol;Acc:15579]                            |
| 2629 | ENSG00000123374 | 887.2410756 | -0.928806111 | 0.134421798 | 3.46E-11 | CDK2      | cyclin-dependent kinase 2 [Source:HGNC Symbol;Acc:1771]                                 |
| 2630 | ENSG00000129270 | 35.37377786 | 3.431710935  | 0.496665485 | 3.46E-11 | MMP28     | matrix metalloproteinase 28 [Source:HGNC Symbol;Acc:14366]                              |
| 2631 | ENSG00000092758 | 395.9001845 | -1.166768624 | 0.168916851 | 3.51E-11 | COL9A3    | collagen, type IX, alpha 3 [Source:HGNC Symbol;Acc:2219]                                |
| 2632 | ENSG00000105808 | 639.0555447 | 1.203757831  | 0.174276134 | 3.51E-11 | RASA4     | RAS p21 protein activator 4 [Source:HGNC Symbol;Acc:23181]                              |
| 2633 | ENSG00000159713 | 80.0558961  | 2.676855675  | 0.387581052 | 3.53E-11 | TPPP3     | tubulin polymerization-promoting protein family member 3 [Source:HGNC Symbol;Acc:24162] |
| 2634 | ENSG00000129534 | 1515.816803 | -0.730506781 | 0.105772307 | 3.53E-11 | MIS18BP1  | MIS18 binding protein 1 [Source:HGNC Symbol;Acc:20190]                                  |
| 2635 | ENSG00000108262 | 801.8311156 | 0.957361045  | 0.138654674 | 3.57E-11 | GIT1      | G protein-coupled receptor kinase interacting ArfGAP 1 [Source:HGNC Symbol;Acc:4272]    |
| 2636 | ENSG00000138185 | 6745.536379 | -0.501408233 | 0.072641771 | 3.63E-11 | ENTPD1    | ectonucleoside triphosphate diphosphohydrolase 1 [Source:HGNC Symbol;Acc:3363]          |
| 2637 | ENSG00000147231 | 88.67725986 | 2.367597368  | 0.343107438 | 3.68E-11 | CXorf57   | chromosome X open reading frame 57 [Source:HGNC Symbol;Acc:25486]                       |
| 2638 | ENSG00000203618 | 20.51253617 | 3.849797577  | 0.558104263 | 3.74E-11 | GP1BB     | glycoprotein Ib (platelet), beta polypeptide [Source:HGNC Symbol;Acc:4440]              |
| 2639 | ENSG00000107560 | 1171.368076 | -0.72319361  | 0.104857109 | 3.77E-11 | RAB11FIP2 | RAB11 family interacting protein 2 (class I) [Source:HGNC Symbol;Acc:29152]             |
| 2640 | ENSG00000170293 | 80.44372362 | 2.444030385  | 0.354408898 | 3.79E-11 | CMTM8     | CKLF-like MARVEL transmembrane domain containing 8 [Source:HGNC Symbol;Acc:19179]       |
| 2641 | ENSG00000156650 | 772.9535636 | 0.827384727  | 0.119979842 | 3.79E-11 | KAT6B     | K(lysine) acetyltransferase 6B [Source:HGNC Symbol;Acc:17582]                           |
| 2642 | ENSG00000145780 | 1544.582222 | -0.673434062 | 0.097696928 | 3.87E-11 | FEM1C     | fem-1 homolog c (C. elegans) [Source:HGNC Symbol;Acc:16933]                             |
| 2643 | ENSG00000125485 | 200.5563924 | 1.626052818  | 0.235931505 | 3.89E-11 | DDX31     | DEAD (Asp-Glu-Ala-Asp) box polypeptide 31 [Source:HGNC Symbol;Acc:16715]                |
| 2644 | ENSG00000117906 | 546.795309  | 0.961425875  | 0.139523604 | 3.93E-11 | RCN2      | reticulocalbin 2, EF-hand calcium binding domain [Source:HGNC Symbol;Acc:9935]          |
| 2645 | ENSG00000170348 | 2308.879513 | 0.56804459   | 0.082471013 | 4.01E-11 | TMED10    | transmembrane emp24-like trafficking protein 10 (yeast) [Source:HGNC Symbol;Acc:16998]  |
| 2646 | ENSG00000147202 | 478.8941235 | -1.005739037 | 0.146024727 | 4.02E-11 | DIAPH2    | diaphanous-related formin 2 [Source:HGNC Symbol;Acc:2877]                               |
| 2647 | ENSG00000090013 | 543.0521138 | -0.994542624 | 0.144435305 | 4.06E-11 | BLVRB     | biliverdin reductase B (flavin reductase (NADPH)) [Source:HGNC Symbol;Acc:1063]         |
| 2648 | ENSG00000145391 | 242.345853  | 1.431063953  | 0.207890058 | 4.12E-11 | SETD7     | SET domain containing (lysine methyltransferase) 7 [Source:HGNC Symbol;Acc:30412]       |
| 2649 | ENSG00000168496 | 454.9892663 | -1.127013582 | 0.163774318 | 4.18E-11 | FEN1      | flap structure-specific endonuclease 1 [Source:HGNC Symbol;Acc:3650]                    |
| 2650 | ENSG00000183421 | 57.80861399 | -2.653536005 | 0.385829282 | 4.30E-11 | RIPK4     | receptor-interacting serine-threonine kinase 4 [Source:HGNC Symbol;Acc:496]             |
| 2651 | ENSG00000146918 | 484.2703136 | -1.026199983 | 0.149248034 | 4.35E-11 | NCAPG2    | non-SMC condensin II complex, subunit G2 [Source:HGNC Symbol;Acc:21904]                 |
| 2652 | ENSG00000091831 | 173.9958725 | -1.901879313 | 0.276650001 | 4.38E-11 | ESR1      | estrogen receptor 1 [Source:HGNC Symbol;Acc:3467]                                       |
| 2653 | ENSG00000213390 | 1510.643477 | -0.60141313  | 0.087507411 | 4.44E-11 | ARHGAP19  | Rho GTPase activating protein 19 [Source:HGNC Symbol;Acc:23724]                         |
| 2654 | ENSG00000149294 | 95.4990149  | 2.580910092  | 0.375535365 | 4.44E-11 | NCAM1     | neural cell adhesion molecule 1 [Source:HGNC Symbol;Acc:7656]                           |

|      |                 |             |              |             |          |           |                                                                                                 |
|------|-----------------|-------------|--------------|-------------|----------|-----------|-------------------------------------------------------------------------------------------------|
| 2655 | ENSG00000049089 | 865.4165654 | -0.8852184   | 0.128813991 | 4.46E-11 | COL9A2    | collagen, type IX, alpha 2 [Source:HGNC Symbol;Acc:2218]                                        |
| 2656 | ENSG00000136514 | 79.56994958 | 2.52570975   | 0.367570091 | 4.48E-11 | RTP4      | receptor (chemosensory) transporter protein 4 [Source:HGNC Symbol;Acc:23992]                    |
| 2657 | ENSG00000167863 | 1483.648945 | -0.610977346 | 0.088916828 | 4.48E-11 | ATP5H     | ATP synthase, H+ transporting, mitochondrial Fo complex, subunit d [Source:HGNC Symbol;Acc:845] |
| 2658 | ENSG00000175449 | 87.13508099 | -2.303887999 | 0.335394487 | 4.55E-11 | RFESD     | Rieske (Fe-S) domain containing [Source:HGNC Symbol;Acc:29587]                                  |
| 2659 | ENSG00000185842 | 116.7097601 | -1.973087906 | 0.287394778 | 4.67E-11 | DNAH14    | dynein, axonemal, heavy chain 14 [Source:HGNC Symbol;Acc:2945]                                  |
| 2660 | ENSG00000149577 | 874.9786635 | 0.823433853  | 0.119950147 | 4.68E-11 | SIDT2     | SID1 transmembrane family, member 2 [Source:HGNC Symbol;Acc:24272]                              |
| 2661 | ENSG00000130811 | 1364.8884   | 0.860810493  | 0.125437421 | 4.76E-11 | EIF3G     | eukaryotic translation initiation factor 3, subunit G [Source:HGNC Symbol;Acc:3274]             |
| 2662 | ENSG00000168384 | 77.26116698 | 2.445815108  | 0.356465402 | 4.80E-11 | HLA-DPA1  | major histocompatibility complex, class II, DP alpha 1 [Source:HGNC Symbol;Acc:4938]            |
| 2663 | ENSG00000060971 | 3950.198141 | -0.464257572 | 0.067774014 | 5.19E-11 | ACAA1     | acetyl-CoA acyltransferase 1 [Source:HGNC Symbol;Acc:82]                                        |
| 2664 | ENSG00000105204 | 262.9837318 | 1.411538247  | 0.206098062 | 5.23E-11 | DYRK1B    | dual-specificity tyrosine-(Y)-phosphorylation regulated kinase 1B [Source:HGNC Symbol;Acc:3092] |
| 2665 | ENSG00000185115 | 259.1565021 | 1.386949792  | 0.202588294 | 5.33E-11 | NDNL2     | necdin-like 2 [Source:HGNC Symbol;Acc:7677]                                                     |
| 2666 | ENSG00000236177 | 77.13136092 | 2.441767236  | 0.35671266  | 5.36E-11 | HLA-DPA1  | major histocompatibility complex, class II, DP alpha 1 [Source:HGNC Symbol;Acc:4938]            |
| 2667 | ENSG00000235844 | 77.13129484 | 2.441762588  | 0.356712457 | 5.36E-11 | HLA-DPA1  | major histocompatibility complex, class II, DP alpha 1 [Source:HGNC Symbol;Acc:4938]            |
| 2668 | ENSG00000176454 | 765.8826307 | 0.863491359  | 0.126161658 | 5.39E-11 | LPCAT4    | lysophosphatidylcholine acyltransferase 4 [Source:HGNC Symbol;Acc:30059]                        |
| 2669 | ENSG00000241978 | 554.1307656 | 1.073357804  | 0.156827023 | 5.39E-11 | AKAP2     | A kinase (PRKA) anchor protein 2 [Source:HGNC Symbol;Acc:372]                                   |
| 2670 | ENSG00000156831 | 347.4910003 | -1.266482403 | 0.185050919 | 5.40E-11 | NSMCE2    | non-SMC element 2, MMS21 homolog ( <i>S. cerevisiae</i> ) [Source:HGNC Symbol;Acc:26513]        |
| 2671 | ENSG00000174021 | 2174.092854 | -0.529614425 | 0.077439313 | 5.58E-11 | GNG5      | guanine nucleotide binding protein (G protein), gamma 5 [Source:HGNC Symbol;Acc:4408]           |
| 2672 | ENSG00000174080 | 106.2727853 | 2.202048084  | 0.321983733 | 5.59E-11 | CTSF      | cathepsin F [Source:HGNC Symbol;Acc:2531]                                                       |
| 2673 | ENSG00000189241 | 1036.860004 | 0.760416572  | 0.111190659 | 5.59E-11 | TSPYL1    | TSPY-like 1 [Source:HGNC Symbol;Acc:12382]                                                      |
| 2674 | ENSG00000121858 | 2241.233403 | 0.59319179   | 0.086752072 | 5.63E-11 | TNFSF10   | tumor necrosis factor (ligand) superfamily, member 10 [Source:HGNC Symbol;Acc:11925]            |
| 2675 | ENSG00000068383 | 1043.111238 | -0.711668671 | 0.104101203 | 5.68E-11 | INPP5A    | inositol polyphosphate-5-phosphatase, 40kDa [Source:HGNC Symbol;Acc:6076]                       |
| 2676 | ENSG00000161395 | 277.5013795 | 1.354503061  | 0.198162107 | 5.72E-11 | PGAP3     | post-GPI attachment to proteins 3 [Source:HGNC Symbol;Acc:23719]                                |
| 2677 | ENSG00000165702 | 164.7082548 | -1.625209886 | 0.237794849 | 5.75E-11 | GFI1B     | growth factor independent 1B transcription repressor [Source:HGNC Symbol;Acc:4238]              |
| 2678 | ENSG00000170667 | 153.2748854 | 1.94098307   | 0.284026942 | 5.78E-11 | RASA4B    | RAS p21 protein activator 4B [Source:HGNC Symbol;Acc:35202]                                     |
| 2679 | ENSG00000196792 | 626.3902921 | -1.024203408 | 0.149932147 | 5.89E-11 | STRN3     | striatin, calmodulin binding protein 3 [Source:HGNC Symbol;Acc:15720]                           |
| 2680 | ENSG00000156642 | 2317.607296 | -0.529495093 | 0.077516242 | 5.90E-11 | NPTN      | neuroplastin [Source:HGNC Symbol;Acc:17867]                                                     |
| 2681 | ENSG00000168899 | 275.6807862 | 1.296877139  | 0.18992836  | 6.00E-11 | VAMP5     | vesicle-associated membrane protein 5 [Source:HGNC Symbol;Acc:12646]                            |
| 2682 | ENSG00000122566 | 19491.85048 | -0.348825454 | 0.051091118 | 6.03E-11 | HNRNPA2B1 | heterogeneous nuclear ribonucleoprotein A2/B1 [Source:HGNC Symbol;Acc:5033]                     |

|      |                 |             |              |             |          |           |                                                                                                     |
|------|-----------------|-------------|--------------|-------------|----------|-----------|-----------------------------------------------------------------------------------------------------|
| 2683 | ENSG00000117425 | 108.1234604 | -2.036402535 | 0.298288959 | 6.05E-11 | PTCH2     | patched 2 [Source:HGNC Symbol;Acc:9586]                                                             |
| 2684 | ENSG00000149357 | 2830.883552 | -0.534934326 | 0.078388102 | 6.17E-11 | LAMTOR1   | late endosomal/lysosomal adaptor, MAPK and MTOR activator 1 [Source:HGNC Symbol;Acc:26068]          |
| 2685 | ENSG00000172216 | 2395.717217 | 0.537202783  | 0.078782367 | 6.40E-11 | CEBPB     | CCAAT/enhancer binding protein (C/EBP), beta [Source:HGNC Symbol;Acc:1834]                          |
| 2686 | ENSG00000169641 | 426.2953482 | 1.058093642  | 0.155198485 | 6.45E-11 | LUZP1     | leucine zipper protein 1 [Source:HGNC Symbol;Acc:14985]                                             |
| 2687 | ENSG00000183044 | 1519.865257 | -0.642631992 | 0.094264082 | 6.46E-11 | ABAT      | 4-aminobutyrate aminotransferase [Source:HGNC Symbol;Acc:23]                                        |
| 2688 | ENSG00000152601 | 9892.15787  | 0.397770401  | 0.058387107 | 6.67E-11 | MBNL1     | muscleblind-like splicing regulator 1 [Source:HGNC Symbol;Acc:6923]                                 |
| 2689 | ENSG00000164111 | 2587.026008 | -0.516206999 | 0.075797317 | 6.78E-11 | ANXA5     | annexin A5 [Source:HGNC Symbol;Acc:543]                                                             |
| 2690 | ENSG00000126016 | 77.0821826  | 2.546189326  | 0.374015035 | 6.90E-11 | AMOT      | angiominin [Source:HGNC Symbol;Acc:17810]                                                           |
| 2691 | ENSG00000159082 | 1407.646964 | -0.68064594  | 0.100004416 | 6.97E-11 | SYNJ1     | synaptojanin 1 [Source:HGNC Symbol;Acc:11503]                                                       |
| 2692 | ENSG00000151849 | 385.9779174 | -1.103283776 | 0.162118014 | 7.00E-11 | CENPJ     | centromere protein J [Source:HGNC Symbol;Acc:17272]                                                 |
| 2693 | ENSG00000140044 | 1569.189345 | -0.791357261 | 0.116298379 | 7.04E-11 | JDP2      | Jun dimerization protein 2 [Source:HGNC Symbol;Acc:17546]                                           |
| 2694 | ENSG00000105486 | 919.3004401 | -0.754377234 | 0.110910243 | 7.18E-11 | LIG1      | ligase I, DNA, ATP-dependent [Source:HGNC Symbol;Acc:6598]                                          |
| 2695 | ENSG00000198959 | 141.3704702 | -1.769543697 | 0.260197795 | 7.23E-11 | TGM2      | transglutaminase 2 [Source:HGNC Symbol;Acc:11778]                                                   |
| 2696 | ENSG00000198763 | 65285.54918 | 0.398772203  | 0.058641732 | 7.25E-11 | MT-ND2    | mitochondrially encoded NADH dehydrogenase 2 [Source:HGNC Symbol;Acc:7456]                          |
| 2697 | ENSG00000169884 | 69.03925488 | 2.680450907  | 0.394199318 | 7.27E-11 | WNT10B    | wingless-type MMTV integration site family, member 10B [Source:HGNC Symbol;Acc:12775]               |
| 2698 | ENSG00000163798 | 1206.745982 | -0.70500085  | 0.103699623 | 7.33E-11 | SLC4A1AP  | solute carrier family 4 (anion exchanger), member 1, adaptor protein [Source:HGNC Symbol;Acc:13813] |
| 2699 | ENSG00000211825 | 43.14782981 | 3.203996445  | 0.471293944 | 7.34E-11 | TRDJ1     | T cell receptor delta joining 1 [Source:HGNC Symbol;Acc:12257]                                      |
| 2700 | ENSG00000141295 | 372.8216841 | 1.183485232  | 0.174135403 | 7.44E-11 | SCRN2     | secernin 2 [Source:HGNC Symbol;Acc:30381]                                                           |
| 2701 | ENSG00000111843 | 524.1561694 | -0.953747593 | 0.140337598 | 7.45E-11 | TMEM14C   | transmembrane protein 14C [Source:HGNC Symbol;Acc:20952]                                            |
| 2702 | ENSG00000174405 | 834.6510371 | 0.780375231  | 0.1148538   | 7.53E-11 | LIG4      | ligase IV, DNA, ATP-dependent [Source:HGNC Symbol;Acc:6601]                                         |
| 2703 | ENSG00000080189 | 1864.807389 | -0.574122507 | 0.084532476 | 7.67E-11 | SLC35C2   | solute carrier family 35 (GDP-fucose transporter), member C2 [Source:HGNC Symbol;Acc:17117]         |
| 2704 | ENSG00000066654 | 1167.15986  | 0.736809468  | 0.108528727 | 7.81E-11 | THUMP1    | THUMP domain containing 1 [Source:HGNC Symbol;Acc:23807]                                            |
| 2705 | ENSG00000100731 | 5364.652644 | -0.503170159 | 0.07412098  | 7.84E-11 | PCNX      | pecanex homolog (Drosophila) [Source:HGNC Symbol;Acc:19740]                                         |
| 2706 | ENSG00000238083 | 1099.632441 | -0.710851876 | 0.1047367   | 7.92E-11 | LRRRC37A2 | leucine rich repeat containing 37, member A2 [Source:HGNC Symbol;Acc:32404]                         |
| 2707 | ENSG00000178381 | 590.5627304 | -0.90676424  | 0.133624016 | 7.97E-11 | ZFAND2A   | zinc finger, AN1-type domain 2A [Source:HGNC Symbol;Acc:28073]                                      |
| 2708 | ENSG00000138613 | 983.9790125 | -0.730602835 | 0.107682773 | 8.04E-11 | APH1B     | APH1B gamma secretase subunit [Source:HGNC Symbol;Acc:24080]                                        |
| 2709 | ENSG00000184661 | 98.40722257 | -2.297779431 | 0.338736453 | 8.11E-11 | CDCA2     | cell division cycle associated 2 [Source:HGNC Symbol;Acc:14623]                                     |
| 2710 | ENSG00000102543 | 497.2544012 | -1.014991552 | 0.149794803 | 8.54E-11 | CDADC1    | cytidine and dCMP deaminase domain containing 1 [Source:HGNC Symbol;Acc:20299]                      |

|      |                 |             |              |             |          |               |                                                                                                                                                               |
|------|-----------------|-------------|--------------|-------------|----------|---------------|---------------------------------------------------------------------------------------------------------------------------------------------------------------|
| 2711 | ENSG00000126561 | 2270.198064 | 0.551457195  | 0.081423802 | 8.73E-11 | STAT5A        | signal transducer and activator of transcription 5A [Source:HGNC Symbol;Acc:11366]                                                                            |
| 2712 | ENSG00000172830 | 1174.036076 | -0.970011958 | 0.143372619 | 9.16E-11 | SSH3          | slingshot protein phosphatase 3 [Source:HGNC Symbol;Acc:30581]                                                                                                |
| 2713 | ENSG00000167543 | 269.4571977 | 1.536958823  | 0.227291197 | 9.38E-11 | TP53I13       | tumor protein p53 inducible protein 13 [Source:HGNC Symbol;Acc:25102]                                                                                         |
| 2714 | ENSG00000163599 | 93.53160099 | 2.85356466   | 0.422073765 | 9.46E-11 | CTLA4         | cytotoxic T-lymphocyte-associated protein 4 [Source:HGNC Symbol;Acc:2505]                                                                                     |
| 2715 | ENSG00000104408 | 3943.029849 | 0.469010746  | 0.06940301  | 9.66E-11 | EIF3E         | eukaryotic translation initiation factor 3, subunit E [Source:HGNC Symbol;Acc:3277]                                                                           |
| 2716 | ENSG00000162959 | 1133.837831 | -0.731653767 | 0.108272622 | 9.67E-11 | MEMO1         | mediator of cell motility 1 [Source:HGNC Symbol;Acc:14014]                                                                                                    |
| 2717 | ENSG00000134291 | 767.6993242 | -0.894685111 | 0.132410084 | 9.71E-11 | TMEM106C      | transmembrane protein 106C [Source:HGNC Symbol;Acc:28775]                                                                                                     |
| 2718 | ENSG00000100079 | 233.5911227 | 1.498152355  | 0.221722641 | 9.71E-11 | LGALS2        | lectin, galactoside-binding, soluble, 2 [Source:HGNC Symbol;Acc:6562]                                                                                         |
| 2719 | ENSG00000265434 | 1983.843934 | -0.56286756  | 0.083304541 | 9.71E-11 | HLA-ABC       | MHC class I antigen [Source:UniProtKB/TrEMBL;Acc:Q5SUL5]                                                                                                      |
| 2720 | ENSG00000094916 | 2129.918488 | -0.528930488 | 0.078310266 | 9.88E-11 | CBX5          | chromobox homolog 5 [Source:HGNC Symbol;Acc:1555]                                                                                                             |
| 2721 | ENSG00000094804 | 188.130306  | -1.62077846  | 0.239980759 | 9.91E-11 | CDC6          | cell division cycle 6 [Source:HGNC Symbol;Acc:1744]                                                                                                           |
| 2722 | ENSG00000120992 | 1527.79727  | -0.643453686 | 0.095278731 | 9.93E-11 | LYPLA1        | lysophospholipase I [Source:HGNC Symbol;Acc:6737]                                                                                                             |
| 2723 | ENSG00000237593 | 47.63364175 | -2.846752922 | 0.421578519 | 9.98E-11 | RP11-317B3.2  |                                                                                                                                                               |
| 2724 | ENSG00000198160 | 2858.428525 | -0.473639572 | 0.070147429 | 1.00E-10 | MIER1         | mesoderm induction early response 1, transcriptional regulator [Source:HGNC Symbol;Acc:29657]                                                                 |
| 2725 | ENSG00000235588 | 3571.485193 | 0.483028395  | 0.071544005 | 1.00E-10 | AIF1          | allograft inflammatory factor 1 [Source:HGNC Symbol;Acc:352]                                                                                                  |
| 2726 | ENSG00000177613 | 744.0786267 | 0.818744414  | 0.121294894 | 1.01E-10 | CSTF2T        | cleavage stimulation factor, 3' pre-RNA, subunit 2, 64kDa, tau variant [Source:HGNC Symbol;Acc:17086]                                                         |
| 2727 | ENSG00000153560 | 1778.446905 | 0.694276059  | 0.10292912  | 1.05E-10 | UBP1          | upstream binding protein 1 (LBP-1a) [Source:HGNC Symbol;Acc:12507]                                                                                            |
| 2728 | ENSG00000103653 | 3384.143344 | 0.725768033  | 0.107611126 | 1.05E-10 | CSK           | c-src tyrosine kinase [Source:HGNC Symbol;Acc:2444]                                                                                                           |
| 2729 | ENSG00000059377 | 3020.750715 | 0.497572019  | 0.073862724 | 1.11E-10 | TBXAS1        | thromboxane A synthase 1 (platelet) [Source:HGNC Symbol;Acc:11609]                                                                                            |
| 2730 | ENSG00000115760 | 2883.476302 | 0.655984806  | 0.097382444 | 1.11E-10 | BIRC6         | baculoviral IAP repeat containing 6 [Source:HGNC Symbol;Acc:13516]                                                                                            |
| 2731 | ENSG00000157856 | 122.1277047 | -1.945164887 | 0.288786642 | 1.12E-10 | DRC1          | dynein regulatory complex subunit 1 homolog (Chlamydomonas) [Source:HGNC Symbol;Acc:24245]                                                                    |
| 2732 | ENSG00000103995 | 434.7213962 | -1.120935485 | 0.166467724 | 1.13E-10 | CEP152        | centrosomal protein 152kDa [Source:HGNC Symbol;Acc:29298]                                                                                                     |
| 2733 | ENSG00000025293 | 1334.617728 | 0.700910711  | 0.10411171  | 1.14E-10 | PHF20         | PHD finger protein 20 [Source:HGNC Symbol;Acc:16098]                                                                                                          |
| 2734 | ENSG00000109466 | 1429.766051 | -0.774939    | 0.115140774 | 1.16E-10 | KLHL2         | kelch-like family member 2 [Source:HGNC Symbol;Acc:6353]                                                                                                      |
| 2735 | ENSG00000214796 | 72.15094732 | -2.382367366 | 0.354240931 | 1.20E-10 | RP11-480I12.5 |                                                                                                                                                               |
| 2736 | ENSG00000166664 | 168.4076375 | -1.645724164 | 0.244707817 | 1.20E-10 | CHRFAM7A      | CHRNA7 (cholinergic receptor, nicotinic, alpha 7, exons 5-10) and FAM7A (family with sequence similarity 7A, exons A-E) fusion [Source:HGNC Symbol;Acc:15781] |
| 2737 | ENSG00000169217 | 1872.045775 | 0.568148506  | 0.084493336 | 1.21E-10 | CD2BP2        | CD2 (cytoplasmic tail) binding protein 2 [Source:HGNC Symbol;Acc:1656]                                                                                        |
| 2738 | ENSG00000109971 | 13206.4207  | 0.324175976  | 0.048211075 | 1.21E-10 | HSPA8         | heat shock 70kDa protein 8 [Source:HGNC Symbol;Acc:5241]                                                                                                      |



|      |                 |             |              |             |          |          |                                                                                                            |
|------|-----------------|-------------|--------------|-------------|----------|----------|------------------------------------------------------------------------------------------------------------|
| 2739 | ENSG00000269858 | 3261.200048 | 0.468262647  | 0.069671537 | 1.23E-10 | EGLN2    | egl-9 family hypoxia-inducible factor 2 [Source:HGNC Symbol;Acc:14660]                                     |
| 2740 | ENSG00000101017 | 147.9032494 | 1.788077892  | 0.266054055 | 1.23E-10 | CD40     | CD40 molecule, TNF receptor superfamily member 5 [Source:HGNC Symbol;Acc:11919]                            |
| 2741 | ENSG00000184292 | 393.486685  | -1.086829143 | 0.161765206 | 1.25E-10 | TACSTD2  | tumor-associated calcium signal transducer 2 [Source:HGNC Symbol;Acc:11530]                                |
| 2742 | ENSG00000097046 | 493.9932822 | -1.090927042 | 0.162450794 | 1.28E-10 | CDC7     | cell division cycle 7 [Source:HGNC Symbol;Acc:1745]                                                        |
| 2743 | ENSG00000182841 | 334.320685  | 1.18944969   | 0.177168707 | 1.29E-10 | RRP7B    | ribosomal RNA processing 7 homolog B (S. cerevisiae) [Source:HGNC Symbol;Acc:30454]                        |
| 2744 | ENSG00000146373 | 401.8479783 | -1.309940343 | 0.195140143 | 1.30E-10 | RNF217   | ring finger protein 217 [Source:HGNC Symbol;Acc:21487]                                                     |
| 2745 | ENSG00000136824 | 460.534804  | -1.034949026 | 0.154220457 | 1.32E-10 | SMC2     | structural maintenance of chromosomes 2 [Source:HGNC Symbol;Acc:14011]                                     |
| 2746 | ENSG00000090339 | 993.477372  | 0.720445984  | 0.107385717 | 1.34E-10 | ICAM1    | intercellular adhesion molecule 1 [Source:HGNC Symbol;Acc:5344]                                            |
| 2747 | ENSG00000079277 | 2422.84439  | -0.496460892 | 0.07400741  | 1.34E-10 | MKNK1    | MAP kinase interacting serine/threonine kinase 1 [Source:HGNC Symbol;Acc:7110]                             |
| 2748 | ENSG00000196154 | 22946.68177 | -0.315357798 | 0.047012671 | 1.34E-10 | S100A4   | S100 calcium binding protein A4 [Source:HGNC Symbol;Acc:10494]                                             |
| 2749 | ENSG00000144445 | 863.8442565 | -0.821655294 | 0.122507947 | 1.35E-10 | KANSL1L  | KAT8 regulatory NSL complex subunit 1-like [Source:HGNC Symbol;Acc:26310]                                  |
| 2750 | ENSG00000124177 | 901.9241298 | 0.761101807  | 0.113511999 | 1.37E-10 | CHD6     | chromodomain helicase DNA binding protein 6 [Source:HGNC Symbol;Acc:19057]                                 |
| 2751 | ENSG00000101220 | 743.6227705 | -0.836311943 | 0.124736316 | 1.37E-10 | C20orf27 | chromosome 20 open reading frame 27 [Source:HGNC Symbol;Acc:15873]                                         |
| 2752 | ENSG00000101290 | 3036.284059 | 0.708881221  | 0.105762495 | 1.39E-10 | CDS2     | CDP-diacylglycerol synthase (phosphatidate cytidyltransferase) 2 [Source:HGNC Symbol;Acc:1801]             |
| 2753 | ENSG00000135766 | 2216.006498 | 0.515847785  | 0.076975298 | 1.40E-10 | EGLN1    | egl-9 family hypoxia-inducible factor 1 [Source:HGNC Symbol;Acc:1232]                                      |
| 2754 | ENSG00000129465 | 1176.963314 | -0.662736882 | 0.098920729 | 1.42E-10 | RIPK3    | receptor-interacting serine-threonine kinase 3 [Source:HGNC Symbol;Acc:10021]                              |
| 2755 | ENSG00000145979 | 452.4914876 | -1.023759317 | 0.152841011 | 1.43E-10 | TBC1D7   | TBC1 domain family, member 7 [Source:HGNC Symbol;Acc:21066]                                                |
| 2756 | ENSG00000105287 | 2443.909443 | 0.51771525   | 0.077292964 | 1.43E-10 | PRKD2    | protein kinase D2 [Source:HGNC Symbol;Acc:17293]                                                           |
| 2757 | ENSG00000128245 | 2992.052056 | -0.478722142 | 0.071500554 | 1.46E-10 | YWHAH    | tyrosine 3-monooxygenase/tryptophan 5-monooxygenase activation protein, eta [Source:HGNC Symbol;Acc:12853] |
| 2758 | ENSG00000197208 | 668.197885  | -0.83183824  | 0.124291972 | 1.49E-10 | SLC22A4  | solute carrier family 22 (organic cation/zwitterion transporter), member 4 [Source:HGNC Symbol;Acc:10968]  |
| 2759 | ENSG00000126524 | 640.1352895 | -0.850443042 | 0.127075163 | 1.49E-10 | SBDS     | Shwachman-Bodian-Diamond syndrome [Source:HGNC Symbol;Acc:19440]                                           |
| 2760 | ENSG00000196911 | 302.2464434 | 1.239004318  | 0.185170053 | 1.50E-10 | KPNA5    | karyopherin alpha 5 (importin alpha 6) [Source:HGNC Symbol;Acc:6398]                                       |
| 2761 | ENSG00000141096 | 503.4003311 | 1.052283119  | 0.15737544  | 1.55E-10 | DPEP3    | dipeptidase 3 [Source:HGNC Symbol;Acc:23029]                                                               |
| 2762 | ENSG00000145247 | 226.7958224 | 1.53308711   | 0.229294914 | 1.55E-10 | OClAD2   | OClA domain containing 2 [Source:HGNC Symbol;Acc:28685]                                                    |
| 2763 | ENSG00000177951 | 1647.263546 | -0.679129898 | 0.10158182  | 1.56E-10 | BET1L    | Bet1 golgi vesicular membrane trafficking protein-like [Source:HGNC Symbol;Acc:19348]                      |
| 2764 | ENSG00000105136 | 241.3782794 | 1.442336423  | 0.215741197 | 1.56E-10 | ZNF419   | zinc finger protein 419 [Source:HGNC Symbol;Acc:20648]                                                     |
| 2765 | ENSG00000110074 | 744.2227082 | -0.815746709 | 0.122038575 | 1.57E-10 | FOXRED1  | FAD-dependent oxidoreductase domain containing 1 [Source:HGNC Symbol;Acc:26927]                            |
| 2766 | ENSG00000109685 | 1605.410866 | -0.62065265  | 0.092879009 | 1.59E-10 | WHSC1    | Wolf-Hirschhorn syndrome candidate 1 [Source:HGNC Symbol;Acc:12766]                                        |

|      |                 |             |              |             |          |          |                                                                                                 |
|------|-----------------|-------------|--------------|-------------|----------|----------|-------------------------------------------------------------------------------------------------|
| 2767 | ENSG00000163608 | 885.2539551 | 0.760619626  | 0.113880156 | 1.63E-10 | C3orf17  | chromosome 3 open reading frame 17 [Source:HGNC Symbol;Acc:24496]                               |
| 2768 | ENSG00000158321 | 195.3007139 | 1.777731716  | 0.266179399 | 1.63E-10 | AUTS2    | autism susceptibility candidate 2 [Source:HGNC Symbol;Acc:14262]                                |
| 2769 | ENSG00000135486 | 14351.66888 | 0.333517201  | 0.049999263 | 1.72E-10 | HNRNPA1  | heterogeneous nuclear ribonucleoprotein A1 [Source:HGNC Symbol;Acc:5031]                        |
| 2770 | ENSG00000150054 | 685.5285225 | -0.846803945 | 0.12703249  | 1.78E-10 | MPP7     | membrane protein, palmitoylated 7 (MAGUK p55 subfamily member 7) [Source:HGNC Symbol;Acc:26542] |
| 2771 | ENSG00000095787 | 6292.600407 | -0.411773979 | 0.061834766 | 1.86E-10 | WAC      | WW domain containing adaptor with coiled-coil [Source:HGNC Symbol;Acc:17327]                    |
| 2772 | ENSG00000116688 | 3191.742493 | -0.483885314 | 0.072688251 | 1.89E-10 | MFN2     | mitofusin 2 [Source:HGNC Symbol;Acc:16877]                                                      |
| 2773 | ENSG00000167325 | 736.8942814 | -0.788096375 | 0.118479362 | 1.95E-10 | RRM1     | ribonucleotide reductase M1 [Source:HGNC Symbol;Acc:10451]                                      |
| 2774 | ENSG00000173207 | 261.8414542 | -1.298704762 | 0.195273424 | 1.97E-10 | CKS1B    | CDC28 protein kinase regulatory subunit 1B [Source:HGNC Symbol;Acc:19083]                       |
| 2775 | ENSG00000131067 | 225.4878945 | 1.628705336  | 0.244919583 | 1.98E-10 | GGT7     | gamma-glutamyltransferase 7 [Source:HGNC Symbol;Acc:4259]                                       |
| 2776 | ENSG00000135912 | 996.6187859 | 0.715065949  | 0.107542322 | 1.99E-10 | TTL4     | tubulin tyrosine ligase-like family, member 4 [Source:HGNC Symbol;Acc:28976]                    |
| 2777 | ENSG00000149328 | 62.17217726 | 2.61745854   | 0.393656044 | 1.99E-10 | GLB1L2   | galactosidase, beta 1-like 2 [Source:HGNC Symbol;Acc:25129]                                     |
| 2778 | ENSG00000170004 | 7553.015511 | -0.392663081 | 0.059061692 | 2.00E-10 | CHD3     | chromodomain helicase DNA binding protein 3 [Source:HGNC Symbol;Acc:1918]                       |
| 2779 | ENSG00000132740 | 473.337269  | -1.014989544 | 0.152759194 | 2.05E-10 | IGHMBP2  | immunoglobulin mu binding protein 2 [Source:HGNC Symbol;Acc:5542]                               |
| 2780 | ENSG00000145335 | 355.2013224 | 1.189785294  | 0.179073567 | 2.05E-10 | SNCA     | synuclein, alpha (non A4 component of amyloid precursor) [Source:HGNC Symbol;Acc:11138]         |
| 2781 | ENSG00000178163 | 531.4571263 | 1.005222708  | 0.15134755  | 2.08E-10 | ZNF518B  | zinc finger protein 518B [Source:HGNC Symbol;Acc:29365]                                         |
| 2782 | ENSG00000009790 | 6139.932676 | 0.402848891  | 0.060669115 | 2.11E-10 | TRAF3IP3 | TRAF3 interacting protein 3 [Source:HGNC Symbol;Acc:30766]                                      |
| 2783 | ENSG00000152495 | 736.5179956 | 2.051340434  | 0.309091468 | 2.16E-10 | CAMK4    | calcium/calmodulin-dependent protein kinase IV [Source:HGNC Symbol;Acc:1464]                    |
| 2784 | ENSG00000076053 | 632.0855874 | -0.849914657 | 0.128065977 | 2.16E-10 | RBM7     | RNA binding motif protein 7 [Source:HGNC Symbol;Acc:9904]                                       |
| 2785 | ENSG00000137819 | 138.5094089 | -1.736819026 | 0.261706357 | 2.16E-10 | PAQR5    | progesterin and adipoQ receptor family member V [Source:HGNC Symbol;Acc:29645]                  |
| 2786 | ENSG00000119537 | 338.6501509 | 1.289556136  | 0.194323985 | 2.16E-10 | KDSR     | 3-ketodihydrospingosine reductase [Source:HGNC Symbol;Acc:4021]                                 |
| 2787 | ENSG00000125249 | 587.2071598 | 1.112557995  | 0.167705392 | 2.19E-10 | RAP2A    | RAP2A, member of RAS oncogene family [Source:HGNC Symbol;Acc:9861]                              |
| 2788 | ENSG00000221978 | 4062.773027 | 0.513664304  | 0.07747842  | 2.26E-10 | CCNL2    | cyclin L2 [Source:HGNC Symbol;Acc:20570]                                                        |
| 2789 | ENSG00000176542 | 1193.421588 | 0.65239144   | 0.098466204 | 2.32E-10 | KIAA2018 | KIAA2018 [Source:HGNC Symbol;Acc:30494]                                                         |
| 2790 | ENSG00000151967 | 346.352399  | 3.302597685  | 0.498852145 | 2.40E-10 | SCHIP1   | schwannomin interacting protein 1 [Source:HGNC Symbol;Acc:15678]                                |
| 2791 | ENSG00000164080 | 1100.915144 | -0.676542833 | 0.102232556 | 2.45E-10 | RAD54L2  | RAD54-like 2 (S. cerevisiae) [Source:HGNC Symbol;Acc:29123]                                     |
| 2792 | ENSG00000185379 | 318.8782005 | -1.186778641 | 0.179344324 | 2.45E-10 | RAD51D   | RAD51 paralog D [Source:HGNC Symbol;Acc:9823]                                                   |
| 2793 | ENSG00000141968 | 3856.977177 | -0.43111037  | 0.06516914  | 2.49E-10 | VAV1     | vav 1 guanine nucleotide exchange factor [Source:HGNC Symbol;Acc:12657]                         |
| 2794 | ENSG00000042980 | 834.6467428 | 0.884588926  | 0.133738476 | 2.50E-10 | ADAM28   | ADAM metallopeptidase domain 28 [Source:HGNC Symbol;Acc:206]                                    |

|      |                 |             |              |             |          |             |                                                                                                                              |
|------|-----------------|-------------|--------------|-------------|----------|-------------|------------------------------------------------------------------------------------------------------------------------------|
| 2795 | ENSG00000164109 | 226.7260229 | -1.359932696 | 0.205646855 | 2.52E-10 | MAD2L1      | MAD2 mitotic arrest deficient-like 1 (yeast) [Source:HGNC Symbol;Acc:6763]                                                   |
| 2796 | ENSG00000187601 | 116.792519  | 1.980265843  | 0.299460993 | 2.52E-10 | MAGEH1      | melanoma antigen family H, 1 [Source:HGNC Symbol;Acc:24092]                                                                  |
| 2797 | ENSG00000065615 | 2943.773658 | -0.455227018 | 0.068851725 | 2.54E-10 | CYB5R4      | cytochrome b5 reductase 4 [Source:HGNC Symbol;Acc:20147]                                                                     |
| 2798 | ENSG00000101126 | 2129.827371 | 0.542760199  | 0.082123102 | 2.59E-10 | ADNP        | activity-dependent neuroprotector homeobox [Source:HGNC Symbol;Acc:15766]                                                    |
| 2799 | ENSG00000166454 | 861.6263862 | 0.77228033   | 0.116904829 | 2.64E-10 | ATMIN       | ATM interactor [Source:HGNC Symbol;Acc:29034]                                                                                |
| 2800 | ENSG00000064225 | 1155.212568 | -0.729818873 | 0.110566188 | 2.73E-10 | ST3GAL6     | ST3 beta-galactoside alpha-2,3-sialyltransferase 6 [Source:HGNC Symbol;Acc:18080]                                            |
| 2801 | ENSG00000144824 | 136.3746557 | 1.833302355  | 0.277810876 | 2.76E-10 | PHLDB2      | pleckstrin homology-like domain, family B, member 2 [Source:HGNC Symbol;Acc:29573]                                           |
| 2802 | ENSG00000093009 | 247.247523  | -1.370645321 | 0.207752785 | 2.79E-10 | CDC45       | cell division cycle 45 [Source:HGNC Symbol;Acc:1739]                                                                         |
| 2803 | ENSG00000080815 | 3153.541071 | -0.459642531 | 0.069702242 | 2.85E-10 | PSEN1       | presenilin 1 [Source:HGNC Symbol;Acc:9508]                                                                                   |
| 2804 | ENSG00000143190 | 1039.445339 | -0.899858395 | 0.136593488 | 2.98E-10 | POU2F1      | POU class 2 homeobox 1 [Source:HGNC Symbol;Acc:9212]                                                                         |
| 2805 | ENSG00000250588 | 61.03674111 | 2.595822807  | 0.394097499 | 3.00E-10 | IQCI-SCHIP1 | IQCI-SCHIP1 readthrough [Source:HGNC Symbol;Acc:38842]                                                                       |
| 2806 | ENSG00000145428 | 372.4937701 | 1.11794042   | 0.169745327 | 3.01E-10 | RNF175      | ring finger protein 175 [Source:HGNC Symbol;Acc:27735]                                                                       |
| 2807 | ENSG00000105227 | 93.01971282 | 2.789736317  | 0.423602155 | 3.02E-10 | PRX         | periaxin [Source:HGNC Symbol;Acc:13797]                                                                                      |
| 2808 | ENSG00000196188 | 25.50614933 | -3.522071962 | 0.534824924 | 3.02E-10 | CTSE        | cathepsin E [Source:HGNC Symbol;Acc:2530]                                                                                    |
| 2809 | ENSG00000166272 | 1905.302927 | 0.547526283  | 0.083143062 | 3.02E-10 | WBP1L       | WW domain binding protein 1-like [Source:HGNC Symbol;Acc:23510]                                                              |
| 2810 | ENSG00000264606 | 25.50527588 | -3.521998972 | 0.5348265   | 3.02E-10 | CTSE        | cathepsin E [Source:HGNC Symbol;Acc:2530]                                                                                    |
| 2811 | ENSG00000069869 | 1176.560487 | -0.70369019  | 0.10687383  | 3.04E-10 | NEDD4       | neural precursor cell expressed, developmentally down-regulated 4, E3 ubiquitin protein ligase [Source:HGNC Symbol;Acc:7727] |
| 2812 | ENSG00000166333 | 3094.571443 | -0.457499864 | 0.069492944 | 3.06E-10 | ILK         | integrin-linked kinase [Source:HGNC Symbol;Acc:6040]                                                                         |
| 2813 | ENSG00000072736 | 3249.527854 | 0.433890591  | 0.065935038 | 3.12E-10 | NFATC3      | nuclear factor of activated T-cells, cytoplasmic, calcineurin-dependent 3 [Source:HGNC Symbol;Acc:7777]                      |
| 2814 | ENSG00000010671 | 1227.988866 | -0.644978705 | 0.098018297 | 3.12E-10 | BTK         | Bruton agammaglobulinemia tyrosine kinase [Source:HGNC Symbol;Acc:1133]                                                      |
| 2815 | ENSG00000221890 | 121.2231301 | 1.979161307  | 0.300788258 | 3.13E-10 | NPTXR       | neuronal pentraxin receptor [Source:HGNC Symbol;Acc:7954]                                                                    |
| 2816 | ENSG00000154511 | 97.66447358 | 2.114333448  | 0.3213716   | 3.15E-10 | FAM69A      | family with sequence similarity 69, member A [Source:HGNC Symbol;Acc:32213]                                                  |
| 2817 | ENSG00000163507 | 212.7395034 | -1.473317895 | 0.224066082 | 3.22E-10 | KIAA1524    | KIAA1524 [Source:HGNC Symbol;Acc:29302]                                                                                      |
| 2818 | ENSG00000095383 | 615.8038991 | -0.927389607 | 0.14105399  | 3.24E-10 | TBC1D2      | TBC1 domain family, member 2 [Source:HGNC Symbol;Acc:18026]                                                                  |
| 2819 | ENSG00000139832 | 509.8737543 | -0.946509463 | 0.143976849 | 3.25E-10 | RAB20       | RAB20, member RAS oncogene family [Source:HGNC Symbol;Acc:18260]                                                             |
| 2820 | ENSG00000205542 | 98639.85684 | -0.285786404 | 0.043483645 | 3.29E-10 | TMSB4X      | thymosin beta 4, X-linked [Source:HGNC Symbol;Acc:11881]                                                                     |
| 2821 | ENSG00000033327 | 3490.960212 | 0.436968581  | 0.066498713 | 3.31E-10 | GAB2        | GRB2-associated binding protein 2 [Source:HGNC Symbol;Acc:14458]                                                             |
| 2822 | ENSG00000268897 | 1227.780887 | -0.64449099  | 0.098086272 | 3.32E-10 | BTK         | Bruton agammaglobulinemia tyrosine kinase [Source:HGNC Symbol;Acc:1133]                                                      |

|      |                 |             |              |             |          |           |                                                                                                                |
|------|-----------------|-------------|--------------|-------------|----------|-----------|----------------------------------------------------------------------------------------------------------------|
| 2823 | ENSG00000134873 | 1216.734958 | 0.697694383  | 0.106203344 | 3.35E-10 | CLDN10    | claudin 10 [Source:HGNC Symbol;Acc:2033]                                                                       |
| 2824 | ENSG00000139537 | 209.7186824 | 1.480708659  | 0.225476721 | 3.40E-10 | CCDC65    | coiled-coil domain containing 65 [Source:HGNC Symbol;Acc:29937]                                                |
| 2825 | ENSG00000092853 | 161.7030921 | -1.650793096 | 0.251418193 | 3.43E-10 | CLSPN     | claspin [Source:HGNC Symbol;Acc:19715]                                                                         |
| 2826 | ENSG00000182534 | 800.1438983 | 0.804481566  | 0.122547889 | 3.45E-10 | MXRA7     | matrix-remodelling associated 7 [Source:HGNC Symbol;Acc:7541]                                                  |
| 2827 | ENSG00000165502 | 2072.053473 | 0.514718878  | 0.078426984 | 3.49E-10 | RPL36AL   | ribosomal protein L36a-like [Source:HGNC Symbol;Acc:10346]                                                     |
| 2828 | ENSG00000140443 | 2594.143682 | -0.517423801 | 0.078839943 | 3.49E-10 | IGF1R     | insulin-like growth factor 1 receptor [Source:HGNC Symbol;Acc:5465]                                            |
| 2829 | ENSG00000137563 | 154.4839717 | -1.70683013  | 0.260073829 | 3.49E-10 | GGH       | gamma-glutamyl hydrolase (conjugase, folic polyglutamyl hydrolase) [Source:HGNC Symbol;Acc:4248]               |
| 2830 | ENSG00000172889 | 127.5045285 | 2.030430458  | 0.309382857 | 3.49E-10 | EGFL7     | EGF-like-domain, multiple 7 [Source:HGNC Symbol;Acc:20594]                                                     |
| 2831 | ENSG00000196683 | 2148.289365 | 0.50428356   | 0.076873567 | 3.56E-10 | TOMM7     | translocase of outer mitochondrial membrane 7 homolog (yeast) [Source:HGNC Symbol;Acc:21648]                   |
| 2832 | ENSG00000163751 | 102.5334969 | -2.021602465 | 0.308213511 | 3.58E-10 | CPA3      | carboxypeptidase A3 (mast cell) [Source:HGNC Symbol;Acc:2298]                                                  |
| 2833 | ENSG00000137070 | 727.9276258 | 0.871345811  | 0.13286312  | 3.60E-10 | IL11RA    | interleukin 11 receptor, alpha [Source:HGNC Symbol;Acc:5967]                                                   |
| 2834 | ENSG00000127720 | 256.3819004 | -1.336553108 | 0.203835621 | 3.62E-10 | METTL25   | methyltransferase like 25 [Source:HGNC Symbol;Acc:26228]                                                       |
| 2835 | ENSG00000005961 | 443.1859032 | 1.046449831  | 0.159675424 | 3.71E-10 | ITGA2B    | integrin, alpha 2b (platelet glycoprotein IIb of IIb/IIIa complex, antigen CD41) [Source:HGNC Symbol;Acc:6138] |
| 2836 | ENSG00000150995 | 665.0456922 | 1.060738309  | 0.161909636 | 3.76E-10 | ITPR1     | inositol 1,4,5-trisphosphate receptor, type 1 [Source:HGNC Symbol;Acc:6180]                                    |
| 2837 | ENSG00000124215 | 206.8827943 | -1.424192321 | 0.217446319 | 3.80E-10 | CDH26     | cadherin 26 [Source:HGNC Symbol;Acc:15902]                                                                     |
| 2838 | ENSG00000100526 | 128.62532   | -1.833402284 | 0.279976727 | 3.83E-10 | CDKN3     | cyclin-dependent kinase inhibitor 3 [Source:HGNC Symbol;Acc:1791]                                              |
| 2839 | ENSG00000180357 | 1077.105987 | 0.732202369  | 0.111825151 | 3.85E-10 | ZNF609    | zinc finger protein 609 [Source:HGNC Symbol;Acc:29003]                                                         |
| 2840 | ENSG00000136490 | 6848.580361 | 0.963289904  | 0.147190716 | 3.93E-10 | LIMD2     | LIM domain containing 2 [Source:HGNC Symbol;Acc:28142]                                                         |
| 2841 | ENSG00000197077 | 159.796078  | 1.678348098  | 0.256550849 | 4.00E-10 | KIAA1671  | KIAA1671 [Source:HGNC Symbol;Acc:29345]                                                                        |
| 2842 | ENSG00000175054 | 798.7013136 | 0.95614653   | 0.146156388 | 4.00E-10 | ATR       | ataxia telangiectasia and Rad3 related [Source:HGNC Symbol;Acc:882]                                            |
| 2843 | ENSG00000044459 | 265.690687  | -1.296659521 | 0.198230907 | 4.02E-10 | CNTLN     | centlein, centrosomal protein [Source:HGNC Symbol;Acc:23432]                                                   |
| 2844 | ENSG00000176978 | 634.1318146 | 1.096087818  | 0.1675728   | 4.02E-10 | DPP7      | dipeptidyl-peptidase 7 [Source:HGNC Symbol;Acc:14892]                                                          |
| 2845 | ENSG00000141367 | 4374.08657  | -0.413872707 | 0.063280868 | 4.04E-10 | CLTC      | clathrin, heavy chain (Hc) [Source:HGNC Symbol;Acc:2092]                                                       |
| 2846 | ENSG00000154237 | 611.0145495 | -0.864801374 | 0.132240668 | 4.06E-10 | LRRK1     | leucine-rich repeat kinase 1 [Source:HGNC Symbol;Acc:18608]                                                    |
| 2847 | ENSG00000211792 | 44.51804532 | 3.079985043  | 0.47136604  | 4.20E-10 | TRAV14DV4 | T cell receptor alpha variable 14/delta variable 4 [Source:HGNC Symbol;Acc:12110]                              |
| 2848 | ENSG00000178038 | 146.659591  | 1.797055896  | 0.275118315 | 4.27E-10 | ALS2CL    | ALS2 C-terminal like [Source:HGNC Symbol;Acc:20605]                                                            |
| 2849 | ENSG00000131759 | 2241.143631 | 0.584110286  | 0.089431397 | 4.28E-10 | RARA      | retinoic acid receptor, alpha [Source:HGNC Symbol;Acc:9864]                                                    |
| 2850 | ENSG00000165806 | 248.3673406 | 1.331525051  | 0.203885394 | 4.30E-10 | CASP7     | caspase 7, apoptosis-related cysteine peptidase [Source:HGNC Symbol;Acc:1508]                                  |

|      |                 |             |              |             |          |           |                                                                                                                  |
|------|-----------------|-------------|--------------|-------------|----------|-----------|------------------------------------------------------------------------------------------------------------------|
| 2851 | ENSG00000243406 | 247.6808205 | 1.325038856  | 0.203054113 | 4.45E-10 | MRPS31P5  | mitochondrial ribosomal protein S31 pseudogene 5 [Source:HGNC Symbol;Acc:39253]                                  |
| 2852 | ENSG00000183401 | 1295.974828 | -0.657020267 | 0.100703853 | 4.48E-10 | CCDC159   | coiled-coil domain containing 159 [Source:HGNC Symbol;Acc:26996]                                                 |
| 2853 | ENSG00000075413 | 3057.814451 | -0.43969389  | 0.067394283 | 4.48E-10 | MARK3     | MAP/microtubule affinity-regulating kinase 3 [Source:HGNC Symbol;Acc:6897]                                       |
| 2854 | ENSG00000138617 | 650.811523  | -0.847277455 | 0.129977356 | 4.65E-10 | PARP16    | poly (ADP-ribose) polymerase family, member 16 [Source:HGNC Symbol;Acc:26040]                                    |
| 2855 | ENSG00000184574 | 109.8492155 | 2.086131735  | 0.320060737 | 4.67E-10 | LPAR5     | lysophosphatidic acid receptor 5 [Source:HGNC Symbol;Acc:13307]                                                  |
| 2856 | ENSG00000177426 | 360.0025103 | 1.136135654  | 0.174349017 | 4.72E-10 | TGIF1     | TGFB-induced factor homeobox 1 [Source:HGNC Symbol;Acc:11776]                                                    |
| 2857 | ENSG00000133138 | 571.3350329 | -0.936093713 | 0.143671791 | 4.75E-10 | TBC1D8B   | TBC1 domain family, member 8B (with GRAM domain) [Source:HGNC Symbol;Acc:24715]                                  |
| 2858 | ENSG00000196123 | 274.9143125 | -1.236096651 | 0.189796356 | 4.83E-10 | KIAA0895L | KIAA0895-like [Source:HGNC Symbol;Acc:34408]                                                                     |
| 2859 | ENSG00000243958 | 545.2034689 | 0.995085227  | 0.152810814 | 4.86E-10 | PSMB9     | proteasome (prosome, macropain) subunit, beta type, 9 [Source:HGNC Symbol;Acc:9546]                              |
| 2860 | ENSG00000240508 | 545.2004867 | 0.995013144  | 0.152808098 | 4.87E-10 | PSMB9     | proteasome (prosome, macropain) subunit, beta type, 9 [Source:HGNC Symbol;Acc:9546]                              |
| 2861 | ENSG00000169220 | 3906.609348 | -0.471209621 | 0.072366127 | 4.87E-10 | RGS14     | regulator of G-protein signaling 14 [Source:HGNC Symbol;Acc:9996]                                                |
| 2862 | ENSG00000100105 | 572.0493671 | 0.968566029  | 0.148812735 | 4.96E-10 | PATZ1     | POZ (BTB) and AT hook containing zinc finger 1 [Source:HGNC Symbol;Acc:13071]                                    |
| 2863 | ENSG00000211793 | 54.53618777 | 2.774563591  | 0.426364548 | 4.99E-10 | TRAV9-2   | T cell receptor alpha variable 9-2 [Source:HGNC Symbol;Acc:12154]                                                |
| 2864 | ENSG00000117650 | 90.82284488 | -2.197728997 | 0.337755473 | 5.01E-10 | NEK2      | NIMA-related kinase 2 [Source:HGNC Symbol;Acc:7745]                                                              |
| 2865 | ENSG00000134262 | 1531.687491 | -0.595994267 | 0.091601719 | 5.03E-10 | AP4B1     | adaptor-related protein complex 4, beta 1 subunit [Source:HGNC Symbol;Acc:572]                                   |
| 2866 | ENSG00000198455 | 167.4813641 | 1.678257069  | 0.258030443 | 5.10E-10 | ZXDB      | zinc finger, X-linked, duplicated B [Source:HGNC Symbol;Acc:13199]                                               |
| 2867 | ENSG00000137815 | 2429.552766 | -0.62160997  | 0.095584999 | 5.13E-10 | RTF1      | Rtf1, Paf1/RNA polymerase II complex component, homolog ( <i>S. cerevisiae</i> ) [Source:HGNC Symbol;Acc:28996]  |
| 2868 | ENSG00000117984 | 12151.46672 | -1.174551538 | 0.180666511 | 5.20E-10 | CTSD      | cathepsin D [Source:HGNC Symbol;Acc:2529]                                                                        |
| 2869 | ENSG00000129518 | 895.5462742 | 0.796054758  | 0.122466247 | 5.23E-10 | EAPP      | E2F-associated phosphoprotein [Source:HGNC Symbol;Acc:19312]                                                     |
| 2870 | ENSG00000103154 | 274.8630851 | 1.33046901   | 0.204747854 | 5.30E-10 | NECAB2    | N-terminal EF-hand calcium binding protein 2 [Source:HGNC Symbol;Acc:23746]                                      |
| 2871 | ENSG00000103222 | 1568.324786 | 0.569280599  | 0.087633714 | 5.37E-10 | ABCC1     | ATP-binding cassette, sub-family C (CFTR/MRP), member 1 [Source:HGNC Symbol;Acc:51]                              |
| 2872 | ENSG00000181804 | 138.433159  | 1.784081744  | 0.274657827 | 5.39E-10 | SLC9A9    | solute carrier family 9, subfamily A (NHE9, cation proton antiporter 9), member 9 [Source:HGNC Symbol;Acc:20653] |
| 2873 | ENSG00000170909 | 371.2284774 | -1.059543053 | 0.163216704 | 5.53E-10 | OSCAR     | osteoclast associated, immunoglobulin-like receptor [Source:HGNC Symbol;Acc:29960]                               |
| 2874 | ENSG00000272919 | 371.2273188 | -1.059509448 | 0.163216918 | 5.54E-10 | OSCAR     | osteoclast associated, immunoglobulin-like receptor [Source:HGNC Symbol;Acc:29960]                               |
| 2875 | ENSG00000272833 | 371.227218  | -1.059511072 | 0.16321792  | 5.54E-10 | OSCAR     | osteoclast associated, immunoglobulin-like receptor [Source:HGNC Symbol;Acc:29960]                               |
| 2876 | ENSG00000242711 | 545.6531888 | 1.007826447  | 0.155270739 | 5.56E-10 | PSMB9     | proteasome (prosome, macropain) subunit, beta type, 9 [Source:HGNC Symbol;Acc:9546]                              |
| 2877 | ENSG00000179855 | 49.85194915 | 2.732322956  | 0.420958257 | 5.56E-10 | GIPC3     | GIPC PDZ domain containing family, member 3 [Source:HGNC Symbol;Acc:18183]                                       |
| 2878 | ENSG00000133818 | 135.3472246 | 1.902031217  | 0.293109896 | 5.61E-10 | RRAS2     | related RAS viral (r-ras) oncogene homolog 2 [Source:HGNC Symbol;Acc:17271]                                      |

|      |                 |             |              |             |          |           |                                                                                                             |
|------|-----------------|-------------|--------------|-------------|----------|-----------|-------------------------------------------------------------------------------------------------------------|
| 2879 | ENSG00000272891 | 371.3787816 | -1.059516706 | 0.163283432 | 5.62E-10 | OSCAR     | osteoclast associated, immunoglobulin-like receptor [Source:HGNC Symbol;Acc:29960]                          |
| 2880 | ENSG00000273239 | 371.3783675 | -1.059491926 | 0.163282542 | 5.63E-10 | OSCAR     | osteoclast associated, immunoglobulin-like receptor [Source:HGNC Symbol;Acc:29960]                          |
| 2881 | ENSG00000181523 | 717.6001606 | 0.898921041  | 0.138573637 | 5.69E-10 | SGSH      | N-sulfoglucosamine sulfohydrolase [Source:HGNC Symbol;Acc:10818]                                            |
| 2882 | ENSG00000125510 | 546.578684  | -1.115244761 | 0.171932032 | 5.70E-10 | OPRL1     | opiate receptor-like 1 [Source:HGNC Symbol;Acc:8155]                                                        |
| 2883 | ENSG00000014138 | 601.7937686 | -0.886497915 | 0.13666788  | 5.70E-10 | POLA2     | polymerase (DNA directed), alpha 2, accessory subunit [Source:HGNC Symbol;Acc:30073]                        |
| 2884 | ENSG00000169129 | 74.46605425 | 2.454145878  | 0.378361524 | 5.71E-10 | AFAP1L2   | actin filament associated protein 1-like 2 [Source:HGNC Symbol;Acc:25901]                                   |
| 2885 | ENSG00000273074 | 371.2417575 | -1.059547035 | 0.163393669 | 5.77E-10 | OSCAR     | osteoclast associated, immunoglobulin-like receptor [Source:HGNC Symbol;Acc:29960]                          |
| 2886 | ENSG00000104332 | 119.3907447 | -1.869830094 | 0.288362906 | 5.78E-10 | SFRP1     | secreted frizzled-related protein 1 [Source:HGNC Symbol;Acc:10776]                                          |
| 2887 | ENSG00000273380 | 371.2393583 | -1.059471069 | 0.163393665 | 5.78E-10 | OSCAR     | osteoclast associated, immunoglobulin-like receptor [Source:HGNC Symbol;Acc:29960]                          |
| 2888 | ENSG00000273222 | 371.2391287 | -1.059461547 | 0.163392943 | 5.78E-10 | OSCAR     | osteoclast associated, immunoglobulin-like receptor [Source:HGNC Symbol;Acc:29960]                          |
| 2889 | ENSG00000273268 | 371.239064  | -1.059458504 | 0.163393248 | 5.78E-10 | OSCAR     | osteoclast associated, immunoglobulin-like receptor [Source:HGNC Symbol;Acc:29960]                          |
| 2890 | ENSG00000004399 | 928.7544288 | 0.783926316  | 0.120998219 | 5.99E-10 | PLXND1    | plexin D1 [Source:HGNC Symbol;Acc:9107]                                                                     |
| 2891 | ENSG00000166847 | 1169.338168 | -0.701198316 | 0.10825191  | 6.04E-10 | DCTN5     | dynactin 5 (p25) [Source:HGNC Symbol;Acc:24594]                                                             |
| 2892 | ENSG00000156509 | 100.9664348 | -2.051547749 | 0.316843851 | 6.14E-10 | FBXO43    | F-box protein 43 [Source:HGNC Symbol;Acc:28521]                                                             |
| 2893 | ENSG00000132199 | 1167.427428 | -0.633671201 | 0.097894562 | 6.22E-10 | ENOSF1    | enolase superfamily member 1 [Source:HGNC Symbol;Acc:30365]                                                 |
| 2894 | ENSG00000184205 | 425.7194108 | 1.012613839  | 0.156487153 | 6.30E-10 | TSPYL2    | TSPY-like 2 [Source:HGNC Symbol;Acc:24358]                                                                  |
| 2895 | ENSG00000171860 | 996.3034119 | -0.688583478 | 0.10641389  | 6.30E-10 | C3AR1     | complement component 3a receptor 1 [Source:HGNC Symbol;Acc:1319]                                            |
| 2896 | ENSG00000165609 | 1484.686177 | 0.737801715  | 0.114048446 | 6.36E-10 | NUDT5     | nudix (nucleoside diphosphate linked moiety X)-type motif 5 [Source:HGNC Symbol;Acc:8052]                   |
| 2897 | ENSG00000104973 | 1556.742752 | 0.66451369   | 0.102719819 | 6.36E-10 | MED25     | mediator complex subunit 25 [Source:HGNC Symbol;Acc:28845]                                                  |
| 2898 | ENSG00000116791 | 219.5126696 | 1.449751018  | 0.224125219 | 6.39E-10 | CRYZ      | crystallin, zeta (quinone reductase) [Source:HGNC Symbol;Acc:2419]                                          |
| 2899 | ENSG00000139675 | 252.0301156 | 1.375955022  | 0.212758652 | 6.44E-10 | HNRNPA1L2 | heterogeneous nuclear ribonucleoprotein A1-like 2 [Source:HGNC Symbol;Acc:27067]                            |
| 2900 | ENSG00000143158 | 912.0283035 | -0.769934818 | 0.119117281 | 6.59E-10 | MPC2      | mitochondrial pyruvate carrier 2 [Source:HGNC Symbol;Acc:24515]                                             |
| 2901 | ENSG00000179222 | 263.6372137 | 1.245884506  | 0.192844369 | 6.73E-10 | MAGED1    | melanoma antigen family D, 1 [Source:HGNC Symbol;Acc:6813]                                                  |
| 2902 | ENSG00000168288 | 1654.305022 | -0.618328358 | 0.095753787 | 6.87E-10 | MMADHC    | methylmalonic aciduria (cobalamin deficiency) cblD type, with homocystinuria [Source:HGNC Symbol;Acc:25221] |
| 2903 | ENSG00000108679 | 355.592068  | 1.181478298  | 0.183097259 | 7.08E-10 | LGALS3BP  | lectin, galactoside-binding, soluble, 3 binding protein [Source:HGNC Symbol;Acc:6564]                       |
| 2904 | ENSG00000213782 | 719.4824232 | 0.861471208  | 0.133532536 | 7.14E-10 | DDX47     | DEAD (Asp-Glu-Ala-Asp) box polypeptide 47 [Source:HGNC Symbol;Acc:18682]                                    |
| 2905 | ENSG00000268018 | 263.4034303 | 1.243700537  | 0.192850939 | 7.25E-10 | MAGED1    | melanoma antigen family D, 1 [Source:HGNC Symbol;Acc:6813]                                                  |
| 2906 | ENSG00000183250 | 146.5466755 | -1.646460137 | 0.255312111 | 7.26E-10 | C21orf67  | chromosome 21 open reading frame 67 [Source:HGNC Symbol;Acc:15707]                                          |

|      |                 |             |              |             |          |         |                                                                                                                    |
|------|-----------------|-------------|--------------|-------------|----------|---------|--------------------------------------------------------------------------------------------------------------------|
| 2907 | ENSG00000196352 | 2685.356053 | -0.526159167 | 0.081603086 | 7.31E-10 | CD55    | CD55 molecule, decay accelerating factor for complement (Cromer blood group) [Source:HGNC Symbol;Acc:2665]         |
| 2908 | ENSG00000105939 | 3131.456881 | 0.475369972  | 0.073752531 | 7.42E-10 | ZC3HAV1 | zinc finger CCCH-type, antiviral 1 [Source:HGNC Symbol;Acc:23721]                                                  |
| 2909 | ENSG00000166130 | 955.1613906 | 0.73740603   | 0.114410163 | 7.42E-10 | IKBIP   | IKBKB interacting protein [Source:HGNC Symbol;Acc:26430]                                                           |
| 2910 | ENSG00000268269 | 426.0338089 | 1.008983971  | 0.156616159 | 7.56E-10 | TSPYL2  | TSPY-like 2 [Source:HGNC Symbol;Acc:24358]                                                                         |
| 2911 | ENSG00000133026 | 318.1808072 | -1.336952253 | 0.20754432  | 7.59E-10 | MYH10   | myosin, heavy chain 10, non-muscle [Source:HGNC Symbol;Acc:7568]                                                   |
| 2912 | ENSG00000061676 | 132.0979804 | 1.786002654  | 0.277401422 | 7.76E-10 | NCKAP1  | NCK-associated protein 1 [Source:HGNC Symbol;Acc:7666]                                                             |
| 2913 | ENSG00000139116 | 175.8883759 | 1.768157194  | 0.274686481 | 7.83E-10 | KIF21A  | kinesin family member 21A [Source:HGNC Symbol;Acc:19349]                                                           |
| 2914 | ENSG00000264364 | 2117.13679  | 0.506292816  | 0.078656301 | 7.84E-10 | DYNLL2  | dynein, light chain, LC8-type 2 [Source:HGNC Symbol;Acc:24596]                                                     |
| 2915 | ENSG00000059588 | 1149.83895  | 0.736358882  | 0.114430124 | 7.93E-10 | TARBP1  | TAR (HIV-1) RNA binding protein 1 [Source:HGNC Symbol;Acc:11568]                                                   |
| 2916 | ENSG00000262960 | 938.7359982 | -0.753638454 | 0.117139169 | 7.99E-10 | NCF1C   | neutrophil cytosolic factor 1C pseudogene [Source:HGNC Symbol;Acc:32523]                                           |
| 2917 | ENSG00000137267 | 44.1766411  | -2.794744975 | 0.434409507 | 8.00E-10 | TUBB2A  | tubulin, beta 2A class IIa [Source:HGNC Symbol;Acc:12412]                                                          |
| 2918 | ENSG00000120733 | 4104.97988  | -0.397039493 | 0.061733393 | 8.10E-10 | KDM3B   | lysine (K)-specific demethylase 3B [Source:HGNC Symbol;Acc:1337]                                                   |
| 2919 | ENSG00000248124 | 394.6176831 | 1.142769445  | 0.177723571 | 8.18E-10 | RRN3P1  | RNA polymerase I transcription factor homolog ( <i>S. cerevisiae</i> ) pseudogene 1 [Source:HGNC Symbol;Acc:30548] |
| 2920 | ENSG00000262556 | 63.27569434 | 2.572929809  | 0.400162329 | 8.19E-10 | KIR2DL1 | killer cell immunoglobulin-like receptor, two domains, long cytoplasmic tail, 1 [Source:HGNC Symbol;Acc:6329]      |
| 2921 | ENSG00000119401 | 112.8304521 | 1.95917402   | 0.304752574 | 8.24E-10 | TRIM32  | tripartite motif containing 32 [Source:HGNC Symbol;Acc:16380]                                                      |
| 2922 | ENSG00000106665 | 132.4144947 | 1.852689017  | 0.28825133  | 8.32E-10 | CLIP2   | CAP-GLY domain containing linker protein 2 [Source:HGNC Symbol;Acc:2586]                                           |
| 2923 | ENSG00000263226 | 132.411862  | 1.852667255  | 0.288249802 | 8.32E-10 | CLIP2   | CAP-GLY domain containing linker protein 2 [Source:HGNC Symbol;Acc:2586]                                           |
| 2924 | ENSG00000128000 | 901.8012139 | -0.790023847 | 0.12294115  | 8.38E-10 | ZNF780B | zinc finger protein 780B [Source:HGNC Symbol;Acc:33109]                                                            |
| 2925 | ENSG00000176928 | 86.72847338 | 2.287118261  | 0.355961485 | 8.43E-10 | GCNT4   | glucosaminyl (N-acetyl) transferase 4, core 2 [Source:HGNC Symbol;Acc:17973]                                       |
| 2926 | ENSG00000001561 | 950.7378726 | -0.754003167 | 0.117360369 | 8.45E-10 | ENPP4   | ectonucleotide pyrophosphatase/phosphodiesterase 4 (putative) [Source:HGNC Symbol;Acc:3359]                        |
| 2927 | ENSG00000131401 | 148.0684094 | 1.744904651  | 0.271688592 | 8.57E-10 | NAPSB   | napsin B aspartic peptidase, pseudogene [Source:HGNC Symbol;Acc:13396]                                             |
| 2928 | ENSG00000165304 | 126.0931509 | -1.812871147 | 0.282347633 | 8.67E-10 | MELK    | maternal embryonic leucine zipper kinase [Source:HGNC Symbol;Acc:16870]                                            |
| 2929 | ENSG00000155849 | 2227.210847 | -0.550266495 | 0.085706857 | 8.69E-10 | ELMO1   | engulfment and cell motility 1 [Source:HGNC Symbol;Acc:16286]                                                      |
| 2930 | ENSG00000163348 | 1144.894324 | 0.641076839  | 0.099878258 | 8.79E-10 | PYGO2   | pygopus family PHD finger 2 [Source:HGNC Symbol;Acc:30257]                                                         |
| 2931 | ENSG00000189079 | 1160.209752 | -0.680066658 | 0.105961513 | 8.81E-10 | ARID2   | AT rich interactive domain 2 (ARID, RFX-like) [Source:HGNC Symbol;Acc:18037]                                       |
| 2932 | ENSG00000120262 | 409.0195994 | -1.141034587 | 0.177836741 | 8.92E-10 | CCDC170 | coiled-coil domain containing 170 [Source:HGNC Symbol;Acc:21177]                                                   |
| 2933 | ENSG00000204852 | 335.0745581 | 1.218320706  | 0.189927711 | 9.01E-10 | TCTN1   | tectonic family member 1 [Source:HGNC Symbol;Acc:26113]                                                            |
| 2934 | ENSG00000162341 | 1348.319165 | -0.617698579 | 0.096296746 | 9.01E-10 | TPCN2   | two pore segment channel 2 [Source:HGNC Symbol;Acc:20820]                                                          |

|      |                 |             |              |             |          |               |                                                                                                                                                 |
|------|-----------------|-------------|--------------|-------------|----------|---------------|-------------------------------------------------------------------------------------------------------------------------------------------------|
| 2935 | ENSG00000142192 | 2479.083244 | -0.505605238 | 0.078822814 | 9.01E-10 | APP           | amyloid beta (A4) precursor protein [Source:HGNC Symbol;Acc:620]                                                                                |
| 2936 | ENSG00000188177 | 833.9297094 | -0.745210093 | 0.11619978  | 9.08E-10 | ZC3H6         | zinc finger CCCH-type containing 6 [Source:HGNC Symbol;Acc:24762]                                                                               |
| 2937 | ENSG00000137265 | 245.9251993 | 1.321281859  | 0.206058553 | 9.14E-10 | IRF4          | interferon regulatory factor 4 [Source:HGNC Symbol;Acc:6119]                                                                                    |
| 2938 | ENSG00000204219 | 61.04424007 | 2.567077742  | 0.400384838 | 9.18E-10 | TCEA3         | transcription elongation factor A (SII), 3 [Source:HGNC Symbol;Acc:11615]                                                                       |
| 2939 | ENSG00000133961 | 5965.743553 | 0.362500621  | 0.056554224 | 9.28E-10 | NUMB          | numb homolog (Drosophila) [Source:HGNC Symbol;Acc:8060]                                                                                         |
| 2940 | ENSG00000154920 | 128.1882099 | -1.721940704 | 0.268712504 | 9.38E-10 | EME1          | essential meiotic structure-specific endonuclease 1 [Source:HGNC Symbol;Acc:24965]                                                              |
| 2941 | ENSG00000106009 | 691.2514895 | 1.078595678  | 0.1683398   | 9.43E-10 | BRAT1         | BRCA1-associated ATM activator 1 [Source:HGNC Symbol;Acc:21701]                                                                                 |
| 2942 | ENSG00000134759 | 846.9619221 | 0.820508636  | 0.128070924 | 9.46E-10 | ELP2          | elongator acetyltransferase complex subunit 2 [Source:HGNC Symbol;Acc:18248]                                                                    |
| 2943 | ENSG00000168758 | 268.4817744 | 1.381592988  | 0.215718695 | 9.59E-10 | SEMA4C        | sema domain, immunoglobulin domain (Ig), transmembrane domain (TM) and short cytoplasmic domain, (semaphorin) 4C [Source:HGNC Symbol;Acc:10731] |
| 2944 | ENSG00000076555 | 470.7793687 | -0.97459721  | 0.152207369 | 9.68E-10 | ACACB         | acetyl-CoA carboxylase beta [Source:HGNC Symbol;Acc:85]                                                                                         |
| 2945 | ENSG00000213073 | 480.4666532 | -0.967996265 | 0.151203524 | 9.75E-10 | RP11-288H12.3 |                                                                                                                                                 |
| 2946 | ENSG00000102445 | 1420.784731 | 0.619414509  | 0.096799716 | 9.94E-10 | KIAA0226L     | KIAA0226-like [Source:HGNC Symbol;Acc:20420]                                                                                                    |
| 2947 | ENSG00000159884 | 250.7669773 | 1.327927661  | 0.20762231  | 1.01E-09 | CCDC107       | coiled-coil domain containing 107 [Source:HGNC Symbol;Acc:28465]                                                                                |
| 2948 | ENSG00000104320 | 2337.872527 | -0.682310226 | 0.106726559 | 1.03E-09 | NBN           | nibrin [Source:HGNC Symbol;Acc:7652]                                                                                                            |
| 2949 | ENSG00000197530 | 522.6868055 | 1.387030703  | 0.216976084 | 1.04E-09 | MIB2          | mindbomb E3 ubiquitin protein ligase 2 [Source:HGNC Symbol;Acc:30577]                                                                           |
| 2950 | ENSG00000132561 | 118.769361  | -2.052393652 | 0.321281867 | 1.07E-09 | MATN2         | matrilin 2 [Source:HGNC Symbol;Acc:6908]                                                                                                        |
| 2951 | ENSG00000111670 | 1846.034616 | 0.547557848  | 0.085769807 | 1.09E-09 | GNPTAB        | N-acetylglucosamine-1-phosphate transferase, alpha and beta subunits [Source:HGNC Symbol;Acc:29670]                                             |
| 2952 | ENSG00000088179 | 956.9393006 | 0.866235808  | 0.135780063 | 1.12E-09 | PTPN4         | protein tyrosine phosphatase, non-receptor type 4 (megakaryocyte) [Source:HGNC Symbol;Acc:9656]                                                 |
| 2953 | ENSG00000170854 | 260.5368235 | 1.331220242  | 0.208842286 | 1.16E-09 | MINA          | MYC induced nuclear antigen [Source:HGNC Symbol;Acc:19441]                                                                                      |
| 2954 | ENSG00000159720 | 4890.116733 | -0.392413992 | 0.061567323 | 1.17E-09 | ATP6V0D1      | ATPase, H+ transporting, lysosomal 38kDa, V0 subunit d1 [Source:HGNC Symbol;Acc:13724]                                                          |
| 2955 | ENSG00000128266 | 55.34505869 | 2.633967246  | 0.413381713 | 1.18E-09 | GNAZ          | guanine nucleotide binding protein (G protein), alpha z polypeptide [Source:HGNC Symbol;Acc:4395]                                               |
| 2956 | ENSG00000204592 | 1356.340818 | 0.861157639  | 0.135187261 | 1.20E-09 | HLA-E         | major histocompatibility complex, class I, E [Source:HGNC Symbol;Acc:4962]                                                                      |
| 2957 | ENSG00000225201 | 1356.337159 | 0.861129258  | 0.135184686 | 1.20E-09 | HLA-E         | major histocompatibility complex, class I, E [Source:HGNC Symbol;Acc:4962]                                                                      |
| 2958 | ENSG00000236632 | 1356.331574 | 0.861090427  | 0.13518363  | 1.20E-09 | HLA-E         | major histocompatibility complex, class I, E [Source:HGNC Symbol;Acc:4962]                                                                      |
| 2959 | ENSG00000184117 | 462.6841855 | 0.991806553  | 0.155764411 | 1.22E-09 | NIPSNAP1      | nipsnap homolog 1 (C. elegans) [Source:HGNC Symbol;Acc:7827]                                                                                    |
| 2960 | ENSG00000130208 | 26.09287806 | -3.262116982 | 0.512355948 | 1.22E-09 | APOC1         | apolipoprotein C-I [Source:HGNC Symbol;Acc:607]                                                                                                 |
| 2961 | ENSG00000133612 | 366.7776636 | 1.083310142  | 0.170153584 | 1.22E-09 | AGAP3         | ArfGAP with GTPase domain, ankyrin repeat and PH domain 3 [Source:HGNC Symbol;Acc:16923]                                                        |
| 2962 | ENSG00000101335 | 92.95023818 | 2.028905549  | 0.318744214 | 1.23E-09 | MYL9          | myosin, light chain 9, regulatory [Source:HGNC Symbol;Acc:15754]                                                                                |



|      |                 |             |              |             |          |          |                                                                                                                 |
|------|-----------------|-------------|--------------|-------------|----------|----------|-----------------------------------------------------------------------------------------------------------------|
| 2963 | ENSG00000136720 | 251.2025354 | 1.393046834  | 0.218868411 | 1.24E-09 | HS6ST1   | heparan sulfate 6-O-sulfotransferase 1 [Source:HGNC Symbol;Acc:5201]                                            |
| 2964 | ENSG00000165025 | 5819.133449 | -0.375623927 | 0.059024633 | 1.24E-09 | SYK      | spleen tyrosine kinase [Source:HGNC Symbol;Acc:11491]                                                           |
| 2965 | ENSG00000164323 | 432.7365625 | 1.011374295  | 0.158926157 | 1.24E-09 | KIAA1430 | KIAA1430 [Source:HGNC Symbol;Acc:29276]                                                                         |
| 2966 | ENSG00000130684 | 792.5274691 | 0.743622868  | 0.116866376 | 1.25E-09 | ZNF337   | zinc finger protein 337 [Source:HGNC Symbol;Acc:15809]                                                          |
| 2967 | ENSG00000186810 | 81.74972116 | 2.482146322  | 0.390237462 | 1.27E-09 | CXCR3    | chemokine (C-X-C motif) receptor 3 [Source:HGNC Symbol;Acc:4540]                                                |
| 2968 | ENSG00000132334 | 6354.285412 | -0.358145576 | 0.056315425 | 1.28E-09 | PTPRE    | protein tyrosine phosphatase, receptor type, E [Source:HGNC Symbol;Acc:9669]                                    |
| 2969 | ENSG00000197140 | 739.5683127 | -0.849649554 | 0.133610248 | 1.28E-09 | ADAM32   | ADAM metalloproteinase domain 32 [Source:HGNC Symbol;Acc:15479]                                                 |
| 2970 | ENSG00000136261 | 470.5483641 | 0.959145114  | 0.150845474 | 1.28E-09 | BZW2     | basic leucine zipper and W2 domains 2 [Source:HGNC Symbol;Acc:18808]                                            |
| 2971 | ENSG00000035720 | 162.6648956 | 1.544420816  | 0.242913421 | 1.29E-09 | STAP1    | signal transducing adaptor family member 1 [Source:HGNC Symbol;Acc:24133]                                       |
| 2972 | ENSG00000183684 | 504.6844612 | -0.979950956 | 0.154143938 | 1.29E-09 | ALYREF   | Aly/REF export factor [Source:HGNC Symbol;Acc:19071]                                                            |
| 2973 | ENSG00000198018 | 176.4576782 | -1.518361868 | 0.238856481 | 1.30E-09 | ENTPD7   | ectonucleoside triphosphate diphosphohydrolase 7 [Source:HGNC Symbol;Acc:19745]                                 |
| 2974 | ENSG00000135127 | 217.1632363 | 1.453719129  | 0.22875045  | 1.31E-09 | CCDC64   | coiled-coil domain containing 64 [Source:HGNC Symbol;Acc:28095]                                                 |
| 2975 | ENSG00000100321 | 401.8808531 | -1.063344855 | 0.167421603 | 1.34E-09 | SYNGR1   | synaptogyrin 1 [Source:HGNC Symbol;Acc:11498]                                                                   |
| 2976 | ENSG00000185864 | 1501.663471 | -0.627296957 | 0.098776735 | 1.35E-09 | NPIPB4   | nuclear pore complex interacting protein family, member B4 [Source:HGNC Symbol;Acc:41985]                       |
| 2977 | ENSG00000123405 | 5627.326275 | -0.387968013 | 0.061101523 | 1.36E-09 | NFE2     | nuclear factor, erythroid 2 [Source:HGNC Symbol;Acc:7780]                                                       |
| 2978 | ENSG00000168610 | 6887.226157 | -0.343985342 | 0.054181859 | 1.36E-09 | STAT3    | signal transducer and activator of transcription 3 (acute-phase response factor) [Source:HGNC Symbol;Acc:11364] |
| 2979 | ENSG00000006047 | 17.09659201 | -3.565515986 | 0.561776756 | 1.38E-09 | YBX2     | Y box binding protein 2 [Source:HGNC Symbol;Acc:17948]                                                          |
| 2980 | ENSG00000172939 | 2304.60811  | -0.537963306 | 0.084789538 | 1.40E-09 | OXS1     | oxidative stress responsive 1 [Source:HGNC Symbol;Acc:8508]                                                     |
| 2981 | ENSG00000182168 | 18.98639454 | 3.508305932  | 0.553259207 | 1.43E-09 | UNC5C    | unc-5 homolog C (C. elegans) [Source:HGNC Symbol;Acc:12569]                                                     |
| 2982 | ENSG00000009307 | 7820.192589 | 0.353592656  | 0.055783784 | 1.45E-09 | CSDE1    | cold shock domain containing E1, RNA-binding [Source:HGNC Symbol;Acc:29905]                                     |
| 2983 | ENSG00000113851 | 1355.625666 | 0.65155419   | 0.102829999 | 1.48E-09 | CRBN     | cereblon [Source:HGNC Symbol;Acc:30185]                                                                         |
| 2984 | ENSG00000114503 | 894.9701911 | 0.726117826  | 0.114618758 | 1.49E-09 | NCBP2    | nuclear cap binding protein subunit 2, 20kDa [Source:HGNC Symbol;Acc:7659]                                      |
| 2985 | ENSG00000090554 | 335.1694198 | 1.191311754  | 0.188104716 | 1.51E-09 | FLT3LG   | fms-related tyrosine kinase 3 ligand [Source:HGNC Symbol;Acc:3766]                                              |
| 2986 | ENSG00000182810 | 235.7401066 | 1.367516368  | 0.216216438 | 1.59E-09 | DDX28    | DEAD (Asp-Glu-Ala-Asp) box polypeptide 28 [Source:HGNC Symbol;Acc:17330]                                        |
| 2987 | ENSG00000115935 | 11435.00903 | 0.326285247  | 0.051596249 | 1.60E-09 | WIPF1    | WAS/WASL interacting protein family, member 1 [Source:HGNC Symbol;Acc:12736]                                    |
| 2988 | ENSG00000125629 | 718.7151749 | -0.903009874 | 0.142823144 | 1.61E-09 | INSIG2   | insulin induced gene 2 [Source:HGNC Symbol;Acc:20452]                                                           |
| 2989 | ENSG00000111786 | 3746.295296 | -0.400392744 | 0.063368639 | 1.65E-09 | SRSF9    | serine/arginine-rich splicing factor 9 [Source:HGNC Symbol;Acc:10791]                                           |
| 2990 | ENSG00000115902 | 492.8413987 | -0.926637884 | 0.146679049 | 1.66E-09 | SLC1A4   | solute carrier family 1 (glutamate/neutral amino acid transporter), member 4 [Source:HGNC Symbol;Acc:10942]     |

|      |                 |             |              |             |          |            |                                                                                                    |
|------|-----------------|-------------|--------------|-------------|----------|------------|----------------------------------------------------------------------------------------------------|
| 2991 | ENSG00000141720 | 1563.058667 | 0.579462639  | 0.091746793 | 1.68E-09 | PIP4K2B    | phosphatidylinositol-5-phosphate 4-kinase, type II, beta [Source:HGNC Symbol;Acc:8998]             |
| 2992 | ENSG00000078304 | 4935.535467 | 0.407963056  | 0.064593428 | 1.68E-09 | PPP2R5C    | protein phosphatase 2, regulatory subunit B', gamma [Source:HGNC Symbol;Acc:9311]                  |
| 2993 | ENSG00000134324 | 834.9819105 | 0.922704209  | 0.146094313 | 1.68E-09 | LPIN1      | lipin 1 [Source:HGNC Symbol;Acc:13345]                                                             |
| 2994 | ENSG00000143545 | 798.2053537 | -0.766375062 | 0.121369875 | 1.70E-09 | RAB13      | RAB13, member RAS oncogene family [Source:HGNC Symbol;Acc:9762]                                    |
| 2995 | ENSG00000271601 | 896.2136361 | 0.815644621  | 0.129175902 | 1.70E-09 | AC243547.1 |                                                                                                    |
| 2996 | ENSG00000139636 | 1728.046987 | 0.545743338  | 0.086443726 | 1.71E-09 | LMBR1L     | limb development membrane protein 1-like [Source:HGNC Symbol;Acc:18268]                            |
| 2997 | ENSG00000197403 | 101.4674658 | -1.930873834 | 0.305846087 | 1.71E-09 | OR6N1      | olfactory receptor, family 6, subfamily N, member 1 [Source:HGNC Symbol;Acc:15034]                 |
| 2998 | ENSG00000159176 | 1059.403115 | -0.643933543 | 0.102061815 | 1.75E-09 | CSRP1      | cysteine and glycine-rich protein 1 [Source:HGNC Symbol;Acc:2469]                                  |
| 2999 | ENSG00000169564 | 8191.016586 | 0.322965952  | 0.05119067  | 1.75E-09 | PCBP1      | poly(rC) binding protein 1 [Source:HGNC Symbol;Acc:8647]                                           |
| 3000 | ENSG00000149925 | 13521.82456 | -0.486280648 | 0.077086458 | 1.76E-09 | ALDOA      | aldolase A, fructose-bisphosphate [Source:HGNC Symbol;Acc:414]                                     |
| 3001 | ENSG00000161920 | 361.4399646 | 1.082499809  | 0.171615934 | 1.77E-09 | MED11      | mediator complex subunit 11 [Source:HGNC Symbol;Acc:32687]                                         |
| 3002 | ENSG00000262523 | 146.8806505 | 1.669632272  | 0.264763839 | 1.78E-09 | ENDOD1     | endonuclease domain containing 1 [Source:HGNC Symbol;Acc:29129]                                    |
| 3003 | ENSG00000215580 | 171.8939073 | 1.547267913  | 0.245369987 | 1.79E-09 | BCORP1     | BCL6 corepressor pseudogene 1 [Source:HGNC Symbol;Acc:23953]                                       |
| 3004 | ENSG00000185022 | 168.0749862 | -1.524757003 | 0.241838782 | 1.80E-09 | MAFF       | v-maf avian musculoaponeurotic fibrosarcoma oncogene homolog F [Source:HGNC Symbol;Acc:6780]       |
| 3005 | ENSG00000169583 | 37.82748022 | 3.157794861  | 0.500933275 | 1.81E-09 | CLIC3      | chloride intracellular channel 3 [Source:HGNC Symbol;Acc:2064]                                     |
| 3006 | ENSG00000157216 | 1060.764972 | 0.732079349  | 0.116235734 | 1.87E-09 | SSBP3      | single stranded DNA binding protein 3 [Source:HGNC Symbol;Acc:15674]                               |
| 3007 | ENSG00000124782 | 1223.156099 | -0.647507554 | 0.102862292 | 1.91E-09 | RREB1      | ras responsive element binding protein 1 [Source:HGNC Symbol;Acc:10449]                            |
| 3008 | ENSG00000102871 | 541.3527824 | 0.87945286   | 0.139743517 | 1.93E-09 | TRADD      | TNFRSF1A-associated via death domain [Source:HGNC Symbol;Acc:12030]                                |
| 3009 | ENSG00000204634 | 625.198692  | -0.895995509 | 0.142468023 | 1.99E-09 | TBC1D8     | TBC1 domain family, member 8 (with GRAM domain) [Source:HGNC Symbol;Acc:17791]                     |
| 3010 | ENSG00000171490 | 1282.05221  | 0.672770387  | 0.106988209 | 2.00E-09 | RSL1D1     | ribosomal L1 domain containing 1 [Source:HGNC Symbol;Acc:24534]                                    |
| 3011 | ENSG00000180884 | 199.0064483 | 1.47571277   | 0.234715244 | 2.01E-09 | ZNF792     | zinc finger protein 792 [Source:HGNC Symbol;Acc:24751]                                             |
| 3012 | ENSG00000179750 | 145.2002821 | -1.627883218 | 0.259021933 | 2.04E-09 | APOBEC3B   | apolipoprotein B mRNA editing enzyme, catalytic polypeptide-like 3B [Source:HGNC Symbol;Acc:17352] |
| 3013 | ENSG00000161326 | 74.58631577 | 2.230400038  | 0.355083733 | 2.08E-09 | DUSP14     | dual specificity phosphatase 14 [Source:HGNC Symbol;Acc:17007]                                     |
| 3014 | ENSG00000189283 | 139.3393921 | 1.799737836  | 0.286602173 | 2.11E-09 | FHIT       | fragile histidine triad [Source:HGNC Symbol;Acc:3701]                                              |
| 3015 | ENSG00000183010 | 42.03982661 | -2.794455454 | 0.445017009 | 2.11E-09 | PYCR1      | pyrroline-5-carboxylate reductase 1 [Source:HGNC Symbol;Acc:9721]                                  |
| 3016 | ENSG00000182087 | 2215.67488  | 0.570663641  | 0.090926708 | 2.15E-09 | TMEM259    | transmembrane protein 259 [Source:HGNC Symbol;Acc:17039]                                           |
| 3017 | ENSG00000255529 | 530.7919253 | 1.080030653  | 0.172095657 | 2.16E-09 | POLR2M     | polymerase (RNA) II (DNA directed) polypeptide M [Source:HGNC Symbol;Acc:14862]                    |
| 3018 | ENSG00000164164 | 1224.701876 | 0.629557706  | 0.100365078 | 2.20E-09 | OTUD4      | OTU domain containing 4 [Source:HGNC Symbol;Acc:24949]                                             |

|      |                 |             |              |             |          |              |                                                                                                             |
|------|-----------------|-------------|--------------|-------------|----------|--------------|-------------------------------------------------------------------------------------------------------------|
| 3019 | ENSG00000203880 | 2059.726646 | 0.512717343  | 0.081751683 | 2.21E-09 | PCMTD2       | protein-L-isoaspartate (D-aspartate) O-methyltransferase domain containing 2 [Source:HGNC Symbol;Acc:15882] |
| 3020 | ENSG00000102575 | 196.0897305 | 1.558626638  | 0.24860346  | 2.24E-09 | ACP5         | acid phosphatase 5, tartrate resistant [Source:HGNC Symbol;Acc:124]                                         |
| 3021 | ENSG00000129810 | 111.3847189 | -1.839270008 | 0.293414595 | 2.26E-09 | SGOL1        | shugoshin-like 1 (S. pombe) [Source:HGNC Symbol;Acc:25088]                                                  |
| 3022 | ENSG00000165533 | 161.8700999 | -1.580620066 | 0.252299394 | 2.31E-09 | TTC8         | tetratricopeptide repeat domain 8 [Source:HGNC Symbol;Acc:20087]                                            |
| 3023 | ENSG00000162599 | 128.1368904 | -1.860634752 | 0.297042227 | 2.32E-09 | NFIA         | nuclear factor I/A [Source:HGNC Symbol;Acc:7784]                                                            |
| 3024 | ENSG00000269837 | 147.0170495 | 1.805714724  | 0.288423142 | 2.37E-09 | RP11-15H20.5 |                                                                                                             |
| 3025 | ENSG00000205045 | 523.4469115 | 0.937403674  | 0.149756461 | 2.39E-09 | SLFN12L      | schlafen family member 12-like [Source:HGNC Symbol;Acc:33920]                                               |
| 3026 | ENSG00000186298 | 2613.301508 | 0.519130192  | 0.082970012 | 2.43E-09 | PPP1CC       | protein phosphatase 1, catalytic subunit, gamma isozyme [Source:HGNC Symbol;Acc:9283]                       |
| 3027 | ENSG00000262327 | 308.8365852 | 1.233462014  | 0.197164991 | 2.44E-09 | AGK          | acylglycerol kinase [Source:HGNC Symbol;Acc:21869]                                                          |
| 3028 | ENSG00000235505 | 224.8769309 | 1.381662012  | 0.220877315 | 2.45E-09 | RP11-693N9.2 |                                                                                                             |
| 3029 | ENSG00000134824 | 631.9377324 | -0.798129172 | 0.127614015 | 2.47E-09 | FADS2        | fatty acid desaturase 2 [Source:HGNC Symbol;Acc:3575]                                                       |
| 3030 | ENSG00000170074 | 312.6823028 | 1.420264873  | 0.227209278 | 2.52E-09 | FAM153A      | family with sequence similarity 153, member A [Source:HGNC Symbol;Acc:29940]                                |
| 3031 | ENSG00000175198 | 236.7707831 | 1.534957634  | 0.245598113 | 2.54E-09 | PCCA         | propionyl CoA carboxylase, alpha polypeptide [Source:HGNC Symbol;Acc:8653]                                  |
| 3032 | ENSG00000076928 | 12255.99561 | -0.444066363 | 0.071074644 | 2.57E-09 | ARHGEF1      | Rho guanine nucleotide exchange factor (GEF) 1 [Source:HGNC Symbol;Acc:681]                                 |
| 3033 | ENSG00000174125 | 2437.69574  | 0.487717222  | 0.078079005 | 2.59E-09 | TLR1         | toll-like receptor 1 [Source:HGNC Symbol;Acc:11847]                                                         |
| 3034 | ENSG00000196247 | 873.7883487 | 0.73801837   | 0.118258882 | 2.69E-09 | ZNF107       | zinc finger protein 107 [Source:HGNC Symbol;Acc:12887]                                                      |
| 3035 | ENSG00000138190 | 1177.260681 | -0.69609587  | 0.11157124  | 2.71E-09 | EXOC6        | exocyst complex component 6 [Source:HGNC Symbol;Acc:23196]                                                  |
| 3036 | ENSG00000123219 | 297.923555  | -1.159442036 | 0.18583704  | 2.71E-09 | CENPK        | centromere protein K [Source:HGNC Symbol;Acc:29479]                                                         |
| 3037 | ENSG00000150712 | 643.6963581 | 0.865488116  | 0.138729143 | 2.72E-09 | MTMR12       | myotubularin related protein 12 [Source:HGNC Symbol;Acc:18191]                                              |
| 3038 | ENSG00000149218 | 147.5487043 | 1.647676498  | 0.264124999 | 2.73E-09 | ENDOD1       | endonuclease domain containing 1 [Source:HGNC Symbol;Acc:29129]                                             |
| 3039 | ENSG00000090006 | 218.2967142 | 1.588544076  | 0.25471421  | 2.75E-09 | LTPB4        | latent transforming growth factor beta binding protein 4 [Source:HGNC Symbol;Acc:6717]                      |
| 3040 | ENSG00000151151 | 1069.097526 | 0.672290637  | 0.107826124 | 2.78E-09 | IPMK         | inositol polyphosphate multikinase [Source:HGNC Symbol;Acc:20739]                                           |
| 3041 | ENSG00000164136 | 163.3145124 | 1.620570479  | 0.259922973 | 2.78E-09 | IL15         | interleukin 15 [Source:HGNC Symbol;Acc:5977]                                                                |
| 3042 | ENSG00000175183 | 213.9076961 | 1.749354254  | 0.28059331  | 2.79E-09 | CSRP2        | cysteine and glycine-rich protein 2 [Source:HGNC Symbol;Acc:2470]                                           |
| 3043 | ENSG00000116903 | 1183.009242 | 0.634132694  | 0.101746727 | 2.82E-09 | EXOC8        | exocyst complex component 8 [Source:HGNC Symbol;Acc:24659]                                                  |
| 3044 | ENSG00000118495 | 969.4232503 | -0.667529075 | 0.107132009 | 2.85E-09 | PLAGL1       | pleiomorphic adenoma gene-like 1 [Source:HGNC Symbol;Acc:9046]                                              |
| 3045 | ENSG00000103326 | 505.3023647 | 1.006437323  | 0.161563946 | 2.88E-09 | CAPN15       | calpain 15 [Source:HGNC Symbol;Acc:11182]                                                                   |
| 3046 | ENSG00000068745 | 1287.786449 | 0.660098892  | 0.106017323 | 2.93E-09 | IP6K2        | inositol hexakisphosphate kinase 2 [Source:HGNC Symbol;Acc:17313]                                           |

|      |                 |             |              |             |          |          |                                                                                                 |
|------|-----------------|-------------|--------------|-------------|----------|----------|-------------------------------------------------------------------------------------------------|
| 3047 | ENSG00000148356 | 691.0200779 | -0.853701042 | 0.137146155 | 2.96E-09 | LRSAM1   | leucine rich repeat and sterile alpha motif containing 1 [Source:HGNC Symbol;Acc:25135]         |
| 3048 | ENSG00000031003 | 1295.464853 | 0.642834317  | 0.103327503 | 3.03E-09 | FAM13B   | family with sequence similarity 13, member B [Source:HGNC Symbol;Acc:1335]                      |
| 3049 | ENSG00000242247 | 1065.525955 | 0.638487852  | 0.102630242 | 3.03E-09 | ARFGAP3  | ADP-ribosylation factor GTPase activating protein 3 [Source:HGNC Symbol;Acc:661]                |
| 3050 | ENSG00000171132 | 237.8926799 | 1.336092562  | 0.214780507 | 3.04E-09 | PRKCE    | protein kinase C, epsilon [Source:HGNC Symbol;Acc:9401]                                         |
| 3051 | ENSG00000006530 | 309.5762277 | 1.225862683  | 0.197080168 | 3.05E-09 | AGK      | acylglycerol kinase [Source:HGNC Symbol;Acc:21869]                                              |
| 3052 | ENSG00000105186 | 808.2115181 | -0.853474218 | 0.137216712 | 3.05E-09 | ANKRD27  | ankyrin repeat domain 27 (VPS9 domain) [Source:HGNC Symbol;Acc:25310]                           |
| 3053 | ENSG00000100721 | 326.9790744 | 1.123056252  | 0.180591626 | 3.07E-09 | TCL1A    | T-cell leukemia/lymphoma 1A [Source:HGNC Symbol;Acc:11648]                                      |
| 3054 | ENSG00000151474 | 348.9613092 | -1.16358473  | 0.187197015 | 3.13E-09 | FRMD4A   | FERM domain containing 4A [Source:HGNC Symbol;Acc:25491]                                        |
| 3055 | ENSG00000161888 | 268.0882637 | -1.482566867 | 0.238549467 | 3.15E-09 | SPC24    | SPC24, NDC80 kinetochore complex component [Source:HGNC Symbol;Acc:26913]                       |
| 3056 | ENSG00000101298 | 82.33038995 | 2.372946085  | 0.382141709 | 3.25E-09 | SNPH     | syntaphilin [Source:HGNC Symbol;Acc:15931]                                                      |
| 3057 | ENSG00000119915 | 73.66995803 | -2.208451992 | 0.355701386 | 3.27E-09 | ELOVL3   | ELOVL fatty acid elongase 3 [Source:HGNC Symbol;Acc:18047]                                      |
| 3058 | ENSG00000129450 | 1249.44607  | -0.600570157 | 0.096734458 | 3.27E-09 | SIGLEC9  | sialic acid binding Ig-like lectin 9 [Source:HGNC Symbol;Acc:10878]                             |
| 3059 | ENSG00000100823 | 1540.391077 | 0.550231113  | 0.088701203 | 3.38E-09 | APEX1    | APEX nuclease (multifunctional DNA repair enzyme) 1 [Source:HGNC Symbol;Acc:587]                |
| 3060 | ENSG00000088826 | 76.27034544 | 2.291277952  | 0.369416489 | 3.40E-09 | SMOX     | spermine oxidase [Source:HGNC Symbol;Acc:15862]                                                 |
| 3061 | ENSG00000076662 | 15746.66831 | 0.32966527   | 0.053183488 | 3.48E-09 | ICAM3    | intercellular adhesion molecule 3 [Source:HGNC Symbol;Acc:5346]                                 |
| 3062 | ENSG00000134285 | 930.143406  | 0.72112869   | 0.116383096 | 3.54E-09 | FKBP11   | FK506 binding protein 11, 19 kDa [Source:HGNC Symbol;Acc:18624]                                 |
| 3063 | ENSG00000162407 | 96.00504839 | -1.941861773 | 0.313410081 | 3.54E-09 | PPAP2B   | phosphatidic acid phosphatase type 2B [Source:HGNC Symbol;Acc:9229]                             |
| 3064 | ENSG00000183763 | 108.6160864 | -1.774477722 | 0.286485025 | 3.58E-09 | TRAIIP   | TRAF interacting protein [Source:HGNC Symbol;Acc:30764]                                         |
| 3065 | ENSG00000147044 | 184.3467623 | 1.742833088  | 0.281378394 | 3.58E-09 | CASK     | calcium/calmodulin-dependent serine protein kinase (MAGUK family) [Source:HGNC Symbol;Acc:1497] |
| 3066 | ENSG00000140612 | 1949.8834   | -0.521388002 | 0.084211749 | 3.64E-09 | SEC11A   | SEC11 homolog A (S. cerevisiae) [Source:HGNC Symbol;Acc:17718]                                  |
| 3067 | ENSG00000111247 | 191.9918216 | -1.502023096 | 0.242790341 | 3.75E-09 | RAD51AP1 | RAD51 associated protein 1 [Source:HGNC Symbol;Acc:16956]                                       |
| 3068 | ENSG00000167513 | 155.4624801 | -1.625886884 | 0.263034187 | 3.88E-09 | CDT1     | chromatin licensing and DNA replication factor 1 [Source:HGNC Symbol;Acc:24576]                 |
| 3069 | ENSG00000137575 | 15533.72482 | 0.322461729  | 0.052174834 | 3.90E-09 | SDCBP    | syndecan binding protein (syntenin) [Source:HGNC Symbol;Acc:10662]                              |
| 3070 | ENSG00000075826 | 1910.365459 | -0.534341801 | 0.086461302 | 3.90E-09 | SEC31B   | SEC31 homolog B (S. cerevisiae) [Source:HGNC Symbol;Acc:23197]                                  |
| 3071 | ENSG00000167851 | 3377.325022 | 0.421318794  | 0.068185564 | 3.93E-09 | CD300A   | CD300a molecule [Source:HGNC Symbol;Acc:19319]                                                  |
| 3072 | ENSG00000134250 | 6310.996832 | 0.350132757  | 0.056720377 | 4.08E-09 | NOTCH2   | notch 2 [Source:HGNC Symbol;Acc:7882]                                                           |
| 3073 | ENSG00000121104 | 1465.25948  | 0.580225413  | 0.094018438 | 4.12E-09 | FAM117A  | family with sequence similarity 117, member A [Source:HGNC Symbol;Acc:24179]                    |
| 3074 | ENSG00000068793 | 314.5169966 | 1.198726703  | 0.194260604 | 4.14E-09 | CYFIP1   | cytoplasmic FMR1 interacting protein 1 [Source:HGNC Symbol;Acc:13759]                           |

|      |                 |             |              |             |          |          |                                                                                                                    |
|------|-----------------|-------------|--------------|-------------|----------|----------|--------------------------------------------------------------------------------------------------------------------|
| 3075 | ENSG00000103472 | 200.4221956 | -1.367630905 | 0.221669706 | 4.16E-09 | RRN3P2   | RNA polymerase I transcription factor homolog ( <i>S. cerevisiae</i> ) pseudogene 2 [Source:HGNC Symbol;Acc:37619] |
| 3076 | ENSG00000109920 | 3022.277909 | 0.475908178  | 0.077170507 | 4.24E-09 | FNBP4    | formin binding protein 4 [Source:HGNC Symbol;Acc:19752]                                                            |
| 3077 | ENSG00000166927 | 455.9384813 | 0.948371647  | 0.153809822 | 4.26E-09 | MS4A7    | membrane-spanning 4-domains, subfamily A, member 7 [Source:HGNC Symbol;Acc:13378]                                  |
| 3078 | ENSG00000158747 | 47.38673537 | 2.824427793  | 0.458121468 | 4.28E-09 | NBL1     | neuroblastoma 1, DAN family BMP antagonist [Source:HGNC Symbol;Acc:7650]                                           |
| 3079 | ENSG00000179841 | 111.2691739 | 1.899150249  | 0.308205739 | 4.37E-09 | AKAP5    | A kinase (PRKA) anchor protein 5 [Source:HGNC Symbol;Acc:375]                                                      |
| 3080 | ENSG00000137094 | 86.6489147  | 2.040949383  | 0.331286282 | 4.40E-09 | DNAJB5   | DnaJ (Hsp40) homolog, subfamily B, member 5 [Source:HGNC Symbol;Acc:14887]                                         |
| 3081 | ENSG00000188158 | 518.9562167 | 1.039901394  | 0.168864557 | 4.47E-09 | NHS      | Nance-Horan syndrome (congenital cataracts and dental anomalies) [Source:HGNC Symbol;Acc:7820]                     |
| 3082 | ENSG00000106565 | 196.9805026 | 1.396001487  | 0.226695415 | 4.47E-09 | TMEM176B | transmembrane protein 176B [Source:HGNC Symbol;Acc:29596]                                                          |
| 3083 | ENSG00000173933 | 1809.728947 | 0.526904488  | 0.085589184 | 4.52E-09 | RBM4     | RNA binding motif protein 4 [Source:HGNC Symbol;Acc:9901]                                                          |
| 3084 | ENSG00000103657 | 3036.384401 | 0.484339729  | 0.078683411 | 4.54E-09 | HERC1    | HECT and RLD domain containing E3 ubiquitin protein ligase family member 1 [Source:HGNC Symbol;Acc:4867]           |
| 3085 | ENSG00000154310 | 396.7274033 | 1.089832612  | 0.177058145 | 4.55E-09 | TNIK     | TRAF2 and NCK interacting kinase [Source:HGNC Symbol;Acc:30765]                                                    |
| 3086 | ENSG00000171604 | 299.3395242 | 1.227546773  | 0.19943237  | 4.55E-09 | CXXC5    | CXXC finger protein 5 [Source:HGNC Symbol;Acc:26943]                                                               |
| 3087 | ENSG00000108654 | 28935.63265 | -0.324826457 | 0.052810646 | 4.67E-09 | DDX5     | DEAD (Asp-Glu-Ala-Asp) box helicase 5 [Source:HGNC Symbol;Acc:2746]                                                |
| 3088 | ENSG00000254470 | 2661.464594 | -0.668542327 | 0.108720516 | 4.72E-09 | AP5B1    | adaptor-related protein complex 5, beta 1 subunit [Source:HGNC Symbol;Acc:25104]                                   |
| 3089 | ENSG00000213762 | 353.1005765 | 1.134090179  | 0.184437571 | 4.73E-09 | ZNF134   | zinc finger protein 134 [Source:HGNC Symbol;Acc:12918]                                                             |
| 3090 | ENSG00000142168 | 1003.922493 | 0.661890597  | 0.107660042 | 4.75E-09 | SOD1     | superoxide dismutase 1, soluble [Source:HGNC Symbol;Acc:11179]                                                     |
| 3091 | ENSG00000225553 | 2615.384926 | -0.496729557 | 0.08080291  | 4.77E-09 | PHF1     | PHD finger protein 1 [Source:HGNC Symbol;Acc:8919]                                                                 |
| 3092 | ENSG00000134215 | 1680.041971 | -0.563038621 | 0.091602449 | 4.79E-09 | VAV3     | vav 3 guanine nucleotide exchange factor [Source:HGNC Symbol;Acc:12659]                                            |
| 3093 | ENSG00000145020 | 783.8045175 | -0.749678121 | 0.122075359 | 4.96E-09 | AMT      | aminomethyltransferase [Source:HGNC Symbol;Acc:473]                                                                |
| 3094 | ENSG00000018280 | 10062.96352 | 0.490735345  | 0.079928953 | 5.00E-09 | SLC11A1  | solute carrier family 11 (proton-coupled divalent metal ion transporter), member 1 [Source:HGNC Symbol;Acc:10907]  |
| 3095 | ENSG00000197147 | 293.5725231 | 1.211466542  | 0.197349415 | 5.03E-09 | LRRC8B   | leucine rich repeat containing 8 family, member B [Source:HGNC Symbol;Acc:30692]                                   |
| 3096 | ENSG00000122694 | 6286.331774 | -0.353225295 | 0.057544657 | 5.04E-09 | GLIPR2   | GLI pathogenesis-related 2 [Source:HGNC Symbol;Acc:18007]                                                          |
| 3097 | ENSG00000261785 | 80.17067097 | 2.246498698  | 0.365993969 | 5.05E-09 | TRBV7-2  | T cell receptor beta variable 7-2 [Source:HGNC Symbol;Acc:12236]                                                   |
| 3098 | ENSG00000166432 | 1074.345158 | 0.655786312  | 0.10686332  | 5.09E-09 | ZMAT1    | zinc finger, matrin-type 1 [Source:HGNC Symbol;Acc:29377]                                                          |
| 3099 | ENSG00000169230 | 2032.184608 | 0.527984215  | 0.086056019 | 5.13E-09 | PRELID1  | PRELI domain containing 1 [Source:HGNC Symbol;Acc:30255]                                                           |
| 3100 | ENSG00000105708 | 200.7300134 | 1.409009405  | 0.229764296 | 5.23E-09 | ZNF14    | zinc finger protein 14 [Source:HGNC Symbol;Acc:12924]                                                              |
| 3101 | ENSG00000060237 | 6225.701311 | -0.415989112 | 0.067839477 | 5.24E-09 | WNK1     | WNK lysine deficient protein kinase 1 [Source:HGNC Symbol;Acc:14540]                                               |
| 3102 | ENSG00000163950 | 1107.092511 | 0.638532828  | 0.10419825  | 5.37E-09 | SLBP     | stem-loop binding protein [Source:HGNC Symbol;Acc:10904]                                                           |

|      |                 |             |              |             |          |             |                                                                                                                        |
|------|-----------------|-------------|--------------|-------------|----------|-------------|------------------------------------------------------------------------------------------------------------------------|
| 3103 | ENSG00000140836 | 247.7574335 | 1.245972519  | 0.203483669 | 5.53E-09 | ZFH3        | zinc finger homeobox 3 [Source:HGNC Symbol;Acc:777]                                                                    |
| 3104 | ENSG00000240053 | 931.2000484 | -0.832437404 | 0.136015248 | 5.63E-09 | LY6G5B      | lymphocyte antigen 6 complex, locus G5B [Source:HGNC Symbol;Acc:13931]                                                 |
| 3105 | ENSG00000185158 | 998.1100644 | -0.649140912 | 0.106065975 | 5.63E-09 | LRRRC37B    | leucine rich repeat containing 37B [Source:HGNC Symbol;Acc:29070]                                                      |
| 3106 | ENSG00000214826 | 444.8682487 | -0.952443294 | 0.155626219 | 5.64E-09 | DDX12P      | DEAD/H (Asp-Glu-Ala-Asp/His) box polypeptide 12, pseudogene [Source:HGNC Symbol;Acc:2737]                              |
| 3107 | ENSG00000175073 | 2123.282889 | 0.522147665  | 0.085325072 | 5.65E-09 | VCIPI1      | valosin containing protein (p97)/p47 complex interacting protein 1 [Source:HGNC Symbol;Acc:30897]                      |
| 3108 | ENSG00000067191 | 107.5576859 | 2.050774422  | 0.335129479 | 5.66E-09 | CACNB1      | calcium channel, voltage-dependent, beta 1 subunit [Source:HGNC Symbol;Acc:1401]                                       |
| 3109 | ENSG00000114346 | 233.5960897 | -1.322781776 | 0.216188828 | 5.68E-09 | ECT2        | epithelial cell transforming sequence 2 oncogene [Source:HGNC Symbol;Acc:3155]                                         |
| 3110 | ENSG00000135299 | 283.1739875 | -1.162979218 | 0.190142334 | 5.76E-09 | ANKRD6      | ankyrin repeat domain 6 [Source:HGNC Symbol;Acc:17280]                                                                 |
| 3111 | ENSG00000103876 | 360.258567  | -1.10661362  | 0.180951735 | 5.79E-09 | FAH         | fumarylacetoacetate hydrolase (fumarylacetoacetase) [Source:HGNC Symbol;Acc:3579]                                      |
| 3112 | ENSG00000224103 | 101.37927   | 2.265591784  | 0.370532898 | 5.83E-09 | HLA-DPA1    | major histocompatibility complex, class II, DP alpha 1 [Source:HGNC Symbol;Acc:4938]                                   |
| 3113 | ENSG00000251196 | 78.1889523  | -2.106332097 | 0.344514742 | 5.84E-09 | RP11-54F2.1 |                                                                                                                        |
| 3114 | ENSG00000111653 | 1107.802274 | 0.615761108  | 0.100756297 | 5.94E-09 | ING4        | inhibitor of growth family, member 4 [Source:HGNC Symbol;Acc:19423]                                                    |
| 3115 | ENSG00000102531 | 1569.066712 | -0.537758456 | 0.088148908 | 6.35E-09 | FNDC3A      | fibronectin type III domain containing 3A [Source:HGNC Symbol;Acc:20296]                                               |
| 3116 | ENSG00000183166 | 69.52761514 | 2.2848149    | 0.374703774 | 6.46E-09 | CALN1       | calneuron 1 [Source:HGNC Symbol;Acc:13248]                                                                             |
| 3117 | ENSG00000213347 | 1082.323121 | -0.93465218  | 0.153341109 | 6.56E-09 | MXD3        | MAX dimerization protein 3 [Source:HGNC Symbol;Acc:14008]                                                              |
| 3118 | ENSG00000110799 | 128.2195262 | 1.939577351  | 0.318267859 | 6.60E-09 | VWF         | von Willebrand factor [Source:HGNC Symbol;Acc:12726]                                                                   |
| 3119 | ENSG00000182621 | 235.7718625 | 1.302758512  | 0.213915825 | 6.77E-09 | PLCB1       | phospholipase C, beta 1 (phosphoinositide-specific) [Source:HGNC Symbol;Acc:15917]                                     |
| 3120 | ENSG00000124659 | 811.4982146 | 0.728223106  | 0.119578612 | 6.78E-09 | TBCC        | tubulin folding cofactor C [Source:HGNC Symbol;Acc:11580]                                                              |
| 3121 | ENSG00000167083 | 68.16973067 | 2.378675904  | 0.390717219 | 6.86E-09 | GNGT2       | guanine nucleotide binding protein (G protein), gamma transducing activity polypeptide 2 [Source:HGNC Symbol;Acc:4412] |
| 3122 | ENSG00000131748 | 1968.47767  | -0.515618327 | 0.084709499 | 6.90E-09 | STARD3      | StAR-related lipid transfer (START) domain containing 3 [Source:HGNC Symbol;Acc:17579]                                 |
| 3123 | ENSG00000151929 | 102.0709567 | 1.955829089  | 0.321321655 | 6.90E-09 | BAG3        | BCL2-associated athanogene 3 [Source:HGNC Symbol;Acc:939]                                                              |
| 3124 | ENSG00000180353 | 22695.98455 | -0.267562621 | 0.043972562 | 6.99E-09 | HCLS1       | hematopoietic cell-specific Lyn substrate 1 [Source:HGNC Symbol;Acc:4844]                                              |
| 3125 | ENSG00000168209 | 739.4011803 | 0.787666698  | 0.129473547 | 7.04E-09 | DDIT4       | DNA-damage-inducible transcript 4 [Source:HGNC Symbol;Acc:24944]                                                       |
| 3126 | ENSG00000128944 | 424.8891224 | -0.965431486 | 0.158694292 | 7.04E-09 | KNSTRN      | kinetochore-localized astrin/SPAG5 binding protein [Source:HGNC Symbol;Acc:30767]                                      |
| 3127 | ENSG00000183475 | 1045.467768 | -0.652379133 | 0.107263573 | 7.10E-09 | ASB7        | ankyrin repeat and SOCS box containing 7 [Source:HGNC Symbol;Acc:17182]                                                |
| 3128 | ENSG00000178026 | 133.5341596 | -1.614462697 | 0.265567444 | 7.22E-09 | FAM211B     | family with sequence similarity 211, member B [Source:HGNC Symbol;Acc:33155]                                           |
| 3129 | ENSG00000179397 | 83.91327223 | -2.018515498 | 0.332078745 | 7.26E-09 | C1orf101    | chromosome 1 open reading frame 101 [Source:HGNC Symbol;Acc:28491]                                                     |
| 3130 | ENSG00000115282 | 1293.842057 | -0.582311943 | 0.095814387 | 7.30E-09 | TTC31       | tetratricopeptide repeat domain 31 [Source:HGNC Symbol;Acc:25759]                                                      |

|      |                 |             |              |             |          |          |                                                                                                                                                          |
|------|-----------------|-------------|--------------|-------------|----------|----------|----------------------------------------------------------------------------------------------------------------------------------------------------------|
| 3131 | ENSG00000148660 | 4399.777745 | -0.362585208 | 0.059678272 | 7.38E-09 | CAMK2G   | calcium/calmodulin-dependent protein kinase II gamma [Source:HGNC Symbol;Acc:1463]                                                                       |
| 3132 | ENSG00000068308 | 1385.732261 | 0.574580524  | 0.094571995 | 7.38E-09 | OTUD5    | OTU domain containing 5 [Source:HGNC Symbol;Acc:25402]                                                                                                   |
| 3133 | ENSG00000164346 | 1186.145732 | 0.659125392  | 0.108506481 | 7.43E-09 | NSA2     | NSA2 ribosome biogenesis homolog (S. cerevisiae) [Source:HGNC Symbol;Acc:30728]                                                                          |
| 3134 | ENSG00000101544 | 456.0738023 | 1.326704831  | 0.218583208 | 7.66E-09 | ADNP2    | ADNP homeobox 2 [Source:HGNC Symbol;Acc:23803]                                                                                                           |
| 3135 | ENSG00000256062 | 164.8554216 | -1.481101103 | 0.244029282 | 7.67E-09 | ABO      | ABO blood group (transferase A, alpha 1-3-N-acetylgalactosaminyltransferase; transferase B, alpha 1-3-galactosyltransferase) [Source:HGNC Symbol;Acc:79] |
| 3136 | ENSG00000132185 | 261.9957629 | 1.264800788  | 0.208425242 | 7.71E-09 | FCRLA    | Fc receptor-like A [Source:HGNC Symbol;Acc:18504]                                                                                                        |
| 3137 | ENSG00000139531 | 509.7221298 | -0.881738958 | 0.145317579 | 7.74E-09 | SUOX     | sulfite oxidase [Source:HGNC Symbol;Acc:11460]                                                                                                           |
| 3138 | ENSG00000267983 | 1385.704327 | 0.574104253  | 0.094636133 | 7.80E-09 | OTUD5    | OTU domain containing 5 [Source:HGNC Symbol;Acc:25402]                                                                                                   |
| 3139 | ENSG00000159445 | 473.1232948 | 0.943864253  | 0.155608145 | 7.84E-09 | THEM4    | thioesterase superfamily member 4 [Source:HGNC Symbol;Acc:17947]                                                                                         |
| 3140 | ENSG00000203811 | 31.01208022 | -2.930047958 | 0.48310624  | 7.86E-09 | HIST2H3C | histone cluster 2, H3c [Source:HGNC Symbol;Acc:20503]                                                                                                    |
| 3141 | ENSG00000203852 | 31.01208022 | -2.930047958 | 0.48310624  | 7.86E-09 | HIST2H3A | histone cluster 2, H3a [Source:HGNC Symbol;Acc:20505]                                                                                                    |
| 3142 | ENSG00000270263 | 31.01208022 | -2.930047958 | 0.48310624  | 7.86E-09 | HIST2H3A | histone cluster 2, H3a [Source:HGNC Symbol;Acc:20505]                                                                                                    |
| 3143 | ENSG00000270827 | 31.01208022 | -2.930047958 | 0.48310624  | 7.86E-09 | HIST2H3C | histone cluster 2, H3c [Source:HGNC Symbol;Acc:20503]                                                                                                    |
| 3144 | ENSG00000133454 | 136.2436879 | 3.420172359  | 0.564009104 | 7.90E-09 | MYO18B   | myosin XVIIIIB [Source:HGNC Symbol;Acc:18150]                                                                                                            |
| 3145 | ENSG00000197548 | 1039.813922 | -0.69684811  | 0.114917074 | 7.90E-09 | ATG7     | autophagy related 7 [Source:HGNC Symbol;Acc:16935]                                                                                                       |
| 3146 | ENSG00000058600 | 589.9521411 | 0.837024306  | 0.138075124 | 7.99E-09 | POLR3E   | polymerase (RNA) III (DNA directed) polypeptide E (80kD) [Source:HGNC Symbol;Acc:30347]                                                                  |
| 3147 | ENSG00000151136 | 148.3837334 | 1.660976721  | 0.2741643   | 8.18E-09 | BTBD11   | BTB (POZ) domain containing 11 [Source:HGNC Symbol;Acc:23844]                                                                                            |
| 3148 | ENSG00000168298 | 33.53489607 | -2.920768934 | 0.482347074 | 8.33E-09 | HIST1H1E | histone cluster 1, H1e [Source:HGNC Symbol;Acc:4718]                                                                                                     |
| 3149 | ENSG00000101412 | 367.4206757 | -1.008221365 | 0.166565194 | 8.45E-09 | E2F1     | E2F transcription factor 1 [Source:HGNC Symbol;Acc:3113]                                                                                                 |
| 3150 | ENSG00000181827 | 597.2213627 | 0.859231762  | 0.142021203 | 8.60E-09 | RFX7     | regulatory factor X, 7 [Source:HGNC Symbol;Acc:25777]                                                                                                    |
| 3151 | ENSG00000213799 | 299.6330184 | 1.151313346  | 0.190299505 | 8.60E-09 | ZNF845   | zinc finger protein 845 [Source:HGNC Symbol;Acc:25112]                                                                                                   |
| 3152 | ENSG00000153814 | 1139.128776 | -0.610807342 | 0.100976976 | 8.65E-09 | JAZF1    | JAZF zinc finger 1 [Source:HGNC Symbol;Acc:28917]                                                                                                        |
| 3153 | ENSG00000140320 | 636.9542769 | 0.840669116  | 0.139067807 | 8.87E-09 | BAHD1    | bromo adjacent homology domain containing 1 [Source:HGNC Symbol;Acc:29153]                                                                               |
| 3154 | ENSG00000026508 | 6207.122513 | -0.402511764 | 0.066618103 | 9.03E-09 | CD44     | CD44 molecule (Indian blood group) [Source:HGNC Symbol;Acc:1681]                                                                                         |
| 3155 | ENSG00000111639 | 944.8848506 | -0.699260303 | 0.115785053 | 9.18E-09 | MRPL51   | mitochondrial ribosomal protein L51 [Source:HGNC Symbol;Acc:14044]                                                                                       |
| 3156 | ENSG00000182557 | 185.8006411 | -1.428710246 | 0.236593574 | 9.21E-09 | SPNS3    | spinster homolog 3 (Drosophila) [Source:HGNC Symbol;Acc:28433]                                                                                           |
| 3157 | ENSG00000163743 | 934.708942  | -0.661952165 | 0.109639531 | 9.28E-09 | RCHY1    | ring finger and CHY zinc finger domain containing 1, E3 ubiquitin protein ligase [Source:HGNC Symbol;Acc:17479]                                          |
| 3158 | ENSG00000135535 | 6722.217793 | -0.339175359 | 0.056178843 | 9.28E-09 | CD164    | CD164 molecule, sialomucin [Source:HGNC Symbol;Acc:1632]                                                                                                 |

|      |                 |             |              |             |          |               |                                                                                                                                                 |
|------|-----------------|-------------|--------------|-------------|----------|---------------|-------------------------------------------------------------------------------------------------------------------------------------------------|
| 3159 | ENSG00000110497 | 529.541548  | 0.850677163  | 0.140923691 | 9.33E-09 | AMBRA1        | autophagy/beclin-1 regulator 1 [Source:HGNC Symbol;Acc:25990]                                                                                   |
| 3160 | ENSG00000132481 | 39.89074788 | 2.928644339  | 0.485207824 | 9.36E-09 | TRIM47        | tripartite motif containing 47 [Source:HGNC Symbol;Acc:19020]                                                                                   |
| 3161 | ENSG00000012232 | 1050.718397 | 0.680876813  | 0.112824441 | 9.42E-09 | EXTL3         | exostosin-like glycosyltransferase 3 [Source:HGNC Symbol;Acc:3518]                                                                              |
| 3162 | ENSG00000105717 | 71.16543088 | 2.441202939  | 0.404632039 | 9.52E-09 | PBX4          | pre-B-cell leukemia homeobox 4 [Source:HGNC Symbol;Acc:13403]                                                                                   |
| 3163 | ENSG00000154328 | 151.3549377 | 1.555992502  | 0.25791431  | 9.52E-09 | NEIL2         | nei endonuclease VIII-like 2 (E. coli) [Source:HGNC Symbol;Acc:18956]                                                                           |
| 3164 | ENSG00000131148 | 476.1081297 | -0.868800405 | 0.144089463 | 9.72E-09 | EMC8          | ER membrane protein complex subunit 8 [Source:HGNC Symbol;Acc:7864]                                                                             |
| 3165 | ENSG00000244115 | 487.8388451 | 1.316145352  | 0.218293036 | 9.74E-09 | DNAJC25-GNG10 | DNAJC25-GNG10 readthrough [Source:HGNC Symbol;Acc:37501]                                                                                        |
| 3166 | ENSG00000125810 | 8468.284883 | 0.314278292  | 0.052132227 | 9.78E-09 | CD93          | CD93 molecule [Source:HGNC Symbol;Acc:15855]                                                                                                    |
| 3167 | ENSG00000082701 | 2121.990051 | -0.55541932  | 0.09217061  | 9.93E-09 | GSK3B         | glycogen synthase kinase 3 beta [Source:HGNC Symbol;Acc:4617]                                                                                   |
| 3168 | ENSG00000157554 | 1567.88294  | -0.522906511 | 0.086799902 | 1.00E-08 | ERG           | v-ets avian erythroblastosis virus E26 oncogene homolog [Source:HGNC Symbol;Acc:3446]                                                           |
| 3169 | ENSG00000262868 | 255.0623962 | 1.234094582  | 0.204880452 | 1.01E-08 | TSEN34        | TSEN34 tRNA splicing endonuclease subunit [Source:HGNC Symbol;Acc:15506]                                                                        |
| 3170 | ENSG00000172247 | 23.72260536 | 3.262684519  | 0.541698555 | 1.01E-08 | C1QTNF4       | C1q and tumor necrosis factor related protein 4 [Source:HGNC Symbol;Acc:14346]                                                                  |
| 3171 | ENSG00000026652 | 954.6458732 | 0.703412828  | 0.116804705 | 1.02E-08 | AGPAT4        | 1-acylglycerol-3-phosphate O-acyltransferase 4 [Source:HGNC Symbol;Acc:20885]                                                                   |
| 3172 | ENSG00000145919 | 222.7717145 | 1.261527164  | 0.209483549 | 1.02E-08 | BOD1          | bioorientation of chromosomes in cell division 1 [Source:HGNC Symbol;Acc:25114]                                                                 |
| 3173 | ENSG00000123191 | 148.4090434 | -1.925194451 | 0.319819085 | 1.03E-08 | ATP7B         | ATPase, Cu <sup>++</sup> transporting, beta polypeptide [Source:HGNC Symbol;Acc:870]                                                            |
| 3174 | ENSG00000185033 | 1949.188325 | -0.64747118  | 0.107569223 | 1.03E-08 | SEMA4B        | sema domain, immunoglobulin domain (Ig), transmembrane domain (TM) and short cytoplasmic domain, (semaphorin) 4B [Source:HGNC Symbol;Acc:10730] |
| 3175 | ENSG00000186417 | 132.7379692 | -1.662683614 | 0.276243794 | 1.04E-08 | GLDN          | gliomedin [Source:HGNC Symbol;Acc:29514]                                                                                                        |
| 3176 | ENSG00000139668 | 1139.529754 | -0.621250255 | 0.103236538 | 1.04E-08 | WDFY2         | WD repeat and FYVE domain containing 2 [Source:HGNC Symbol;Acc:20482]                                                                           |
| 3177 | ENSG00000262716 | 254.9079016 | 1.234043056  | 0.205074275 | 1.04E-08 | TSEN34        | TSEN34 tRNA splicing endonuclease subunit [Source:HGNC Symbol;Acc:15506]                                                                        |
| 3178 | ENSG00000162702 | 1468.567442 | 0.565422073  | 0.093976617 | 1.05E-08 | ZNF281        | zinc finger protein 281 [Source:HGNC Symbol;Acc:13075]                                                                                          |
| 3179 | ENSG00000158715 | 277.7026426 | 1.130717142  | 0.187936892 | 1.05E-08 | SLC45A3       | solute carrier family 45, member 3 [Source:HGNC Symbol;Acc:8642]                                                                                |
| 3180 | ENSG00000157106 | 7153.467163 | -0.351123305 | 0.058362407 | 1.05E-08 | SMG1          | SMG1 phosphatidylinositol 3-kinase-related kinase [Source:HGNC Symbol;Acc:30045]                                                                |
| 3181 | ENSG00000165185 | 287.2647715 | -1.126991523 | 0.187365191 | 1.06E-08 | KIAA1958      | KIAA1958 [Source:HGNC Symbol;Acc:23427]                                                                                                         |
| 3182 | ENSG00000177932 | 142.9593262 | 1.615240489  | 0.268656881 | 1.08E-08 | ZNF354C       | zinc finger protein 354C [Source:HGNC Symbol;Acc:16736]                                                                                         |
| 3183 | ENSG00000168538 | 1318.544004 | -0.580418599 | 0.096554317 | 1.08E-08 | TRAPPC11      | trafficking protein particle complex 11 [Source:HGNC Symbol;Acc:25751]                                                                          |
| 3184 | ENSG00000126214 | 2115.651787 | -0.471498048 | 0.078555902 | 1.15E-08 | KLC1          | kinesin light chain 1 [Source:HGNC Symbol;Acc:6387]                                                                                             |
| 3185 | ENSG00000156299 | 232.3725584 | 1.330345219  | 0.221778641 | 1.17E-08 | TIAM1         | T-cell lymphoma invasion and metastasis 1 [Source:HGNC Symbol;Acc:11805]                                                                        |
| 3186 | ENSG00000120217 | 140.2479969 | 1.711193604  | 0.285341261 | 1.18E-08 | CD274         | CD274 molecule [Source:HGNC Symbol;Acc:17635]                                                                                                   |



|      |                 |             |              |             |          |          |                                                                                                               |
|------|-----------------|-------------|--------------|-------------|----------|----------|---------------------------------------------------------------------------------------------------------------|
| 3187 | ENSG00000198162 | 821.2402877 | 0.729523874  | 0.121652105 | 1.18E-08 | MAN1A2   | mannosidase, alpha, class 1A, member 2 [Source:HGNC Symbol;Acc:6822]                                          |
| 3188 | ENSG00000188641 | 2447.47499  | -0.449609244 | 0.074976187 | 1.18E-08 | DPYD     | dihydropyrimidine dehydrogenase [Source:HGNC Symbol;Acc:3012]                                                 |
| 3189 | ENSG00000163349 | 4696.099669 | -0.376758469 | 0.062854077 | 1.20E-08 | HIPK1    | homeodomain interacting protein kinase 1 [Source:HGNC Symbol;Acc:19006]                                       |
| 3190 | ENSG00000100523 | 393.0911237 | 0.986908585  | 0.164655851 | 1.20E-08 | DDHD1    | DDHD domain containing 1 [Source:HGNC Symbol;Acc:19714]                                                       |
| 3191 | ENSG00000162676 | 1136.795536 | -0.639915245 | 0.106766821 | 1.20E-08 | GFI1     | growth factor independent 1 transcription repressor [Source:HGNC Symbol;Acc:4237]                             |
| 3192 | ENSG00000029993 | 144.59663   | -1.584268173 | 0.264435226 | 1.22E-08 | HMGB3    | high mobility group box 3 [Source:HGNC Symbol;Acc:5004]                                                       |
| 3193 | ENSG00000187147 | 1826.952698 | 0.544135272  | 0.09082565  | 1.22E-08 | RNF220   | ring finger protein 220 [Source:HGNC Symbol;Acc:25552]                                                        |
| 3194 | ENSG00000100982 | 1037.2532   | 0.704141598  | 0.117539363 | 1.22E-08 | PCIF1    | PDX1 C-terminal inhibiting factor 1 [Source:HGNC Symbol;Acc:16200]                                            |
| 3195 | ENSG00000270502 | 255.1093057 | 1.227403668  | 0.204922892 | 1.23E-08 | TSEN34   | TSEN34 tRNA splicing endonuclease subunit [Source:HGNC Symbol;Acc:15506]                                      |
| 3196 | ENSG00000213689 | 281.2017826 | 1.207439032  | 0.201590377 | 1.23E-08 | TREX1    | three prime repair exonuclease 1 [Source:HGNC Symbol;Acc:12269]                                               |
| 3197 | ENSG00000269411 | 144.5823482 | -1.583803106 | 0.264480331 | 1.24E-08 | HMGB3    | high mobility group box 3 [Source:HGNC Symbol;Acc:5004]                                                       |
| 3198 | ENSG00000211698 | 67.1500093  | 2.310237396  | 0.385805094 | 1.24E-08 | TRGV4    | T cell receptor gamma variable 4 [Source:HGNC Symbol;Acc:12289]                                               |
| 3199 | ENSG00000151503 | 737.375026  | -0.769704609 | 0.128585216 | 1.26E-08 | NCAPD3   | non-SMC condensin II complex, subunit D3 [Source:HGNC Symbol;Acc:28952]                                       |
| 3200 | ENSG00000004809 | 269.8165269 | -1.169044664 | 0.195459677 | 1.30E-08 | SLC22A16 | solute carrier family 22 (organic cation/carnitine transporter), member 16 [Source:HGNC Symbol;Acc:20302]     |
| 3201 | ENSG00000178814 | 134.4286066 | -1.760186822 | 0.294476344 | 1.33E-08 | OPLAH    | 5-oxoprolinase (ATP-hydrolysing) [Source:HGNC Symbol;Acc:8149]                                                |
| 3202 | ENSG00000185619 | 2657.300812 | -0.437316015 | 0.073174462 | 1.33E-08 | PCGF3    | polycomb group ring finger 3 [Source:HGNC Symbol;Acc:10066]                                                   |
| 3203 | ENSG00000145779 | 3659.335835 | -0.422459054 | 0.070704188 | 1.34E-08 | TNFAIP8  | tumor necrosis factor, alpha-induced protein 8 [Source:HGNC Symbol;Acc:17260]                                 |
| 3204 | ENSG00000272602 | 837.8274919 | -0.685587152 | 0.114766541 | 1.35E-08 | ZNF595   | Homo sapiens zinc finger protein 595 (ZNF595), transcript variant 1, mRNA. [Source:RefSeq mRNA;Acc:NM_182524] |
| 3205 | ENSG00000155265 | 122.5984941 | 1.856840111  | 0.311259357 | 1.42E-08 | GOLGA7B  | golgin A7 family, member B [Source:HGNC Symbol;Acc:31668]                                                     |
| 3206 | ENSG00000077152 | 140.6335105 | -1.580907228 | 0.2651946   | 1.46E-08 | UBE2T    | ubiquitin-conjugating enzyme E2T (putative) [Source:HGNC Symbol;Acc:25009]                                    |
| 3207 | ENSG00000198625 | 4135.13412  | -0.398724397 | 0.066918407 | 1.49E-08 | MDM4     | Mdm4 p53 binding protein homolog (mouse) [Source:HGNC Symbol;Acc:6974]                                        |
| 3208 | ENSG00000132825 | 887.0736411 | -0.691383772 | 0.116116947 | 1.52E-08 | PPP1R3D  | protein phosphatase 1, regulatory subunit 3D [Source:HGNC Symbol;Acc:9294]                                    |
| 3209 | ENSG00000186001 | 1367.269206 | -0.663529285 | 0.111449831 | 1.53E-08 | LRCH3    | leucine-rich repeats and calponin homology (CH) domain containing 3 [Source:HGNC Symbol;Acc:28637]            |
| 3210 | ENSG00000196584 | 290.9062354 | -1.097421235 | 0.184451309 | 1.57E-08 | XRCC2    | X-ray repair complementing defective repair in Chinese hamster cells 2 [Source:HGNC Symbol;Acc:12829]         |
| 3211 | ENSG00000132879 | 456.0222576 | 0.953620224  | 0.16039837  | 1.61E-08 | FBXO44   | F-box protein 44 [Source:HGNC Symbol;Acc:24847]                                                               |
| 3212 | ENSG00000138594 | 1640.177043 | -0.574382646 | 0.096679984 | 1.65E-08 | TMOD3    | tropomodulin 3 (ubiquitous) [Source:HGNC Symbol;Acc:11873]                                                    |
| 3213 | ENSG00000223629 | 122.9287467 | -1.782088832 | 0.30036118  | 1.73E-08 | DEFA8P   | defensin, alpha 8 pseudogene [Source:HGNC Symbol;Acc:31799]                                                   |
| 3214 | ENSG00000168003 | 1148.933076 | -0.604002159 | 0.101864732 | 1.77E-08 | SLC3A2   | solute carrier family 3 (amino acid transporter heavy chain), member 2 [Source:HGNC Symbol;Acc:11026]         |

|      |                 |             |              |             |          |          |                                                                                                                              |
|------|-----------------|-------------|--------------|-------------|----------|----------|------------------------------------------------------------------------------------------------------------------------------|
| 3215 | ENSG00000130770 | 1417.915268 | -0.531966228 | 0.089719328 | 1.77E-08 | ATPIF1   | ATPase inhibitory factor 1 [Source:HGNC Symbol;Acc:871]                                                                      |
| 3216 | ENSG00000242028 | 569.4363154 | -1.009033211 | 0.170194113 | 1.78E-08 | HYPK     | huntingtin interacting protein K [Source:HGNC Symbol;Acc:18418]                                                              |
| 3217 | ENSG00000185482 | 346.9901684 | -1.134743909 | 0.191415663 | 1.78E-08 | STAC3    | SH3 and cysteine rich domain 3 [Source:HGNC Symbol;Acc:28423]                                                                |
| 3218 | ENSG00000138757 | 1746.060004 | 0.523255294  | 0.088338721 | 1.84E-08 | G3BP2    | GTPase activating protein (SH3 domain) binding protein 2 [Source:HGNC Symbol;Acc:30291]                                      |
| 3219 | ENSG00000083223 | 2997.38905  | 0.449463716  | 0.075889443 | 1.84E-08 | ZCCHC6   | zinc finger, CCHC domain containing 6 [Source:HGNC Symbol;Acc:25817]                                                         |
| 3220 | ENSG00000136279 | 7934.401909 | -0.397892075 | 0.06720526  | 1.86E-08 | DBNL     | drebrin-like [Source:HGNC Symbol;Acc:2696]                                                                                   |
| 3221 | ENSG00000156968 | 724.5661695 | -0.723436592 | 0.122213201 | 1.88E-08 | MPV17L   | MPV17 mitochondrial membrane protein-like [Source:HGNC Symbol;Acc:26827]                                                     |
| 3222 | ENSG00000125885 | 356.9522802 | -1.01329972  | 0.171241542 | 1.90E-08 | MCM8     | minichromosome maintenance complex component 8 [Source:HGNC Symbol;Acc:16147]                                                |
| 3223 | ENSG00000176953 | 2523.150211 | -0.438774873 | 0.07417615  | 1.92E-08 | NFATC2IP | nuclear factor of activated T-cells, cytoplasmic, calcineurin-dependent 2 interacting protein [Source:HGNC Symbol;Acc:25906] |
| 3224 | ENSG00000160703 | 1015.992115 | -0.685473602 | 0.115898651 | 1.93E-08 | NLRX1    | NLR family member X1 [Source:HGNC Symbol;Acc:29890]                                                                          |
| 3225 | ENSG00000146476 | 772.451977  | -0.699093923 | 0.118286908 | 1.98E-08 | C6orf211 | chromosome 6 open reading frame 211 [Source:HGNC Symbol;Acc:17872]                                                           |
| 3226 | ENSG00000139734 | 65.71718969 | -2.221853631 | 0.375997228 | 1.99E-08 | DIAPH3   | diaphanous-related formin 3 [Source:HGNC Symbol;Acc:15480]                                                                   |
| 3227 | ENSG00000095397 | 81.97625176 | 2.106680909  | 0.356506949 | 1.99E-08 | DFNB31   | deafness, autosomal recessive 31 [Source:HGNC Symbol;Acc:16361]                                                              |
| 3228 | ENSG00000162604 | 673.7066235 | -0.824537069 | 0.139561025 | 2.01E-08 | TM2D1    | TM2 domain containing 1 [Source:HGNC Symbol;Acc:24142]                                                                       |
| 3229 | ENSG00000155957 | 3291.988561 | -0.386376617 | 0.065435123 | 2.05E-08 | TMBIM4   | transmembrane BAX inhibitor motif containing 4 [Source:HGNC Symbol;Acc:24257]                                                |
| 3230 | ENSG00000271363 | 97.45568786 | 2.146031976  | 0.36347619  | 2.05E-08 | PHF16    | Protein Jade-3 [Source:UniProtKB/TrEMBL;Acc:F2Z3N8]                                                                          |
| 3231 | ENSG00000066923 | 635.2733388 | -0.814167069 | 0.137922822 | 2.07E-08 | STAG3    | stromal antigen 3 [Source:HGNC Symbol;Acc:11356]                                                                             |
| 3232 | ENSG00000099821 | 355.7928575 | 1.097385891  | 0.185901845 | 2.07E-08 | POLRMT   | polymerase (RNA) mitochondrial (DNA directed) [Source:HGNC Symbol;Acc:9200]                                                  |
| 3233 | ENSG00000111644 | 392.9141028 | 1.055242161  | 0.178804695 | 2.08E-08 | ACRBP    | acrosin binding protein [Source:HGNC Symbol;Acc:17195]                                                                       |
| 3234 | ENSG00000178982 | 2391.785697 | 0.471010743  | 0.079813111 | 2.09E-08 | EIF3K    | eukaryotic translation initiation factor 3, subunit K [Source:HGNC Symbol;Acc:24656]                                         |
| 3235 | ENSG00000154165 | 67.37433645 | 2.388260972  | 0.405142009 | 2.17E-08 | GPR15    | G protein-coupled receptor 15 [Source:HGNC Symbol;Acc:4469]                                                                  |
| 3236 | ENSG00000133488 | 33.20596128 | -2.767717029 | 0.469648798 | 2.19E-08 | SEC14L4  | SEC14-like 4 ( <i>S. cerevisiae</i> ) [Source:HGNC Symbol;Acc:20627]                                                         |
| 3237 | ENSG00000166295 | 2218.937618 | 0.465193242  | 0.078957681 | 2.21E-08 | ANAPC16  | anaphase promoting complex subunit 16 [Source:HGNC Symbol;Acc:26976]                                                         |
| 3238 | ENSG00000131389 | 13723.32526 | -0.270284136 | 0.04591421  | 2.28E-08 | SLC6A6   | solute carrier family 6 (neurotransmitter transporter), member 6 [Source:HGNC Symbol;Acc:11052]                              |
| 3239 | ENSG00000134070 | 301.3623293 | -1.090969205 | 0.185339666 | 2.28E-08 | IRAK2    | interleukin-1 receptor-associated kinase 2 [Source:HGNC Symbol;Acc:6113]                                                     |
| 3240 | ENSG00000173442 | 6296.266254 | 0.426341498  | 0.07243503  | 2.29E-08 | EHBP1L1  | EH domain binding protein 1-like 1 [Source:HGNC Symbol;Acc:30682]                                                            |
| 3241 | ENSG00000189171 | 192.9599853 | 1.313521038  | 0.223188935 | 2.30E-08 | S100A13  | S100 calcium binding protein A13 [Source:HGNC Symbol;Acc:10490]                                                              |
| 3242 | ENSG00000103510 | 1442.851407 | 0.547020286  | 0.093016349 | 2.36E-08 | KAT8     | K(lysine) acetyltransferase 8 [Source:HGNC Symbol;Acc:17933]                                                                 |

|      |                 |             |              |             |          |         |                                                                                                                                 |
|------|-----------------|-------------|--------------|-------------|----------|---------|---------------------------------------------------------------------------------------------------------------------------------|
| 3243 | ENSG00000163050 | 1206.505845 | 0.637053641  | 0.108454373 | 2.46E-08 | ADCK3   | aarF domain containing kinase 3 [Source:HGNC Symbol;Acc:16812]                                                                  |
| 3244 | ENSG00000076604 | 131.8965357 | 1.689404113  | 0.287627485 | 2.46E-08 | TRAF4   | TNF receptor-associated factor 4 [Source:HGNC Symbol;Acc:12034]                                                                 |
| 3245 | ENSG00000157796 | 454.2426641 | 1.035886075  | 0.176366612 | 2.46E-08 | WDR19   | WD repeat domain 19 [Source:HGNC Symbol;Acc:18340]                                                                              |
| 3246 | ENSG00000198648 | 324.5734211 | 1.081618022  | 0.184210151 | 2.49E-08 | STK39   | serine threonine kinase 39 [Source:HGNC Symbol;Acc:17717]                                                                       |
| 3247 | ENSG00000167074 | 162.2852126 | 1.476686031  | 0.251494443 | 2.49E-08 | TEF     | thyrotrophic embryonic factor [Source:HGNC Symbol;Acc:11722]                                                                    |
| 3248 | ENSG00000089818 | 1696.134862 | -0.510863928 | 0.087010965 | 2.49E-08 | NECAP1  | NECAP endocytosis associated 1 [Source:HGNC Symbol;Acc:24539]                                                                   |
| 3249 | ENSG00000135960 | 43.27042462 | 2.659462448  | 0.453190296 | 2.54E-08 | EDAR    | ectodysplasin A receptor [Source:HGNC Symbol;Acc:2895]                                                                          |
| 3250 | ENSG00000130881 | 209.5128857 | -1.67542097  | 0.285534309 | 2.54E-08 | LRP3    | low density lipoprotein receptor-related protein 3 [Source:HGNC Symbol;Acc:6695]                                                |
| 3251 | ENSG00000128487 | 1089.486581 | -0.639962027 | 0.109096552 | 2.57E-08 | SPECC1  | sperm antigen with calponin homology and coiled-coil domains 1 [Source:HGNC Symbol;Acc:30615]                                   |
| 3252 | ENSG00000152332 | 3311.933876 | 0.398091684  | 0.067871122 | 2.58E-08 | UHMK1   | U2AF homology motif (UHM) kinase 1 [Source:HGNC Symbol;Acc:19683]                                                               |
| 3253 | ENSG00000162433 | 105.7832803 | -1.819309114 | 0.310325785 | 2.62E-08 | AK4     | adenylate kinase 4 [Source:HGNC Symbol;Acc:363]                                                                                 |
| 3254 | ENSG00000107242 | 287.9167236 | -1.104146015 | 0.188403485 | 2.65E-08 | PIP5K1B | phosphatidylinositol-4-phosphate 5-kinase, type I, beta [Source:HGNC Symbol;Acc:8995]                                           |
| 3255 | ENSG00000100290 | 132.0176724 | -1.545575039 | 0.263758558 | 2.66E-08 | BIK     | BCL2-interacting killer (apoptosis-inducing) [Source:HGNC Symbol;Acc:1051]                                                      |
| 3256 | ENSG00000103202 | 428.7340639 | -0.95501874  | 0.162988593 | 2.67E-08 | NME4    | NME/NM23 nucleoside diphosphate kinase 4 [Source:HGNC Symbol;Acc:7852]                                                          |
| 3257 | ENSG00000102760 | 808.9713078 | -0.73147426  | 0.12492148  | 2.73E-08 | RGCC    | regulator of cell cycle [Source:HGNC Symbol;Acc:20369]                                                                          |
| 3258 | ENSG00000158292 | 50.63239173 | 2.476445831  | 0.42309614  | 2.77E-08 | GPR153  | G protein-coupled receptor 153 [Source:HGNC Symbol;Acc:23618]                                                                   |
| 3259 | ENSG00000015676 | 983.9847208 | 0.717231238  | 0.122638239 | 2.85E-08 | NUDCD3  | NudC domain containing 3 [Source:HGNC Symbol;Acc:22208]                                                                         |
| 3260 | ENSG00000109762 | 125.1342252 | 1.759376936  | 0.300930622 | 2.88E-08 | SNX25   | sorting nexin 25 [Source:HGNC Symbol;Acc:21883]                                                                                 |
| 3261 | ENSG00000167994 | 27.46673385 | -2.995815847 | 0.512708096 | 2.94E-08 | RAB31L1 | RAB3A interacting protein (rabin3)-like 1 [Source:HGNC Symbol;Acc:9780]                                                         |
| 3262 | ENSG00000132604 | 670.2204312 | 0.741861081  | 0.126990777 | 2.96E-08 | TERF2   | telomeric repeat binding factor 2 [Source:HGNC Symbol;Acc:11729]                                                                |
| 3263 | ENSG00000171806 | 155.6276137 | 1.500444107  | 0.256882014 | 2.98E-08 | METTL18 | methyltransferase like 18 [Source:HGNC Symbol;Acc:28793]                                                                        |
| 3264 | ENSG00000151883 | 6752.079406 | 0.347113466  | 0.059438477 | 3.00E-08 | PARP8   | poly (ADP-ribose) polymerase family, member 8 [Source:HGNC Symbol;Acc:26124]                                                    |
| 3265 | ENSG00000164574 | 1807.554085 | -0.528547614 | 0.090514525 | 3.00E-08 | GALNT10 | UDP-N-acetyl-alpha-D-galactosamine:polypeptide N-acetylgalactosaminyltransferase 10 (GalNAc-T10) [Source:HGNC Symbol;Acc:19873] |
| 3266 | ENSG00000159556 | 114.5074517 | 1.889386361  | 0.323649397 | 3.03E-08 | ISL2    | ISL LIM homeobox 2 [Source:HGNC Symbol;Acc:18524]                                                                               |
| 3267 | ENSG00000124549 | 192.213063  | 1.337512631  | 0.229162526 | 3.05E-08 | BTN2A3P | butyrophilin, subfamily 2, member A3, pseudogene [Source:HGNC Symbol;Acc:13229]                                                 |
| 3268 | ENSG00000141027 | 3800.135603 | -0.423428672 | 0.072558978 | 3.07E-08 | NCOR1   | nuclear receptor corepressor 1 [Source:HGNC Symbol;Acc:7672]                                                                    |
| 3269 | ENSG00000166986 | 4797.223432 | -0.354797405 | 0.06080973  | 3.09E-08 | MARS    | methionyl-tRNA synthetase [Source:HGNC Symbol;Acc:6898]                                                                         |
| 3270 | ENSG00000196449 | 328.9359448 | -1.012889511 | 0.173681618 | 3.14E-08 | YRDC    | yrDC N(6)-threonylcarbamoyltransferase domain containing [Source:HGNC Symbol;Acc:28905]                                         |

|      |                 |             |              |             |          |            |                                                                                                           |
|------|-----------------|-------------|--------------|-------------|----------|------------|-----------------------------------------------------------------------------------------------------------|
| 3271 | ENSG00000007168 | 3857.256389 | -0.406641409 | 0.069739418 | 3.15E-08 | PFAFH1B1   | platelet-activating factor acetylhydrolase 1b, regulatory subunit 1 (45kDa) [Source:HGNC Symbol;Acc:8574] |
| 3272 | ENSG00000267972 | 52.44209521 | 2.664631523  | 0.457030009 | 3.16E-08 | DGKK       | Homo sapiens diacylglycerol kinase, kappa (DGKK), mRNA. [Source:RefSeq mRNA;Acc:NM_001013742]             |
| 3273 | ENSG00000176049 | 100.1502438 | 1.805027877  | 0.309609177 | 3.17E-08 | JAKMIP2    | janus kinase and microtubule interacting protein 2 [Source:HGNC Symbol;Acc:29067]                         |
| 3274 | ENSG00000270498 | 73.28390316 | -2.026147334 | 0.347563026 | 3.18E-08 | IGHG4      | immunoglobulin heavy constant gamma 4 (G4m marker) [Source:HGNC Symbol;Acc:5528]                          |
| 3275 | ENSG00000211892 | 73.28390316 | -2.026147334 | 0.347563026 | 3.18E-08 | IGHG4      | immunoglobulin heavy constant gamma 4 (G4m marker) [Source:HGNC Symbol;Acc:5528]                          |
| 3276 | ENSG00000066933 | 447.8058059 | 0.939468955  | 0.161175494 | 3.19E-08 | MYO9A      | myosin IXA [Source:HGNC Symbol;Acc:7608]                                                                  |
| 3277 | ENSG00000146433 | 1400.656904 | 0.571576611  | 0.098060928 | 3.19E-08 | TMEM181    | transmembrane protein 181 [Source:HGNC Symbol;Acc:20958]                                                  |
| 3278 | ENSG00000148344 | 83.33649038 | -2.163336302 | 0.371196491 | 3.20E-08 | PTGES      | prostaglandin E synthase [Source:HGNC Symbol;Acc:9599]                                                    |
| 3279 | ENSG00000255398 | 742.0317015 | 0.726588577  | 0.124689611 | 3.22E-08 | HCAR3      | hydroxycarboxylic acid receptor 3 [Source:HGNC Symbol;Acc:16824]                                          |
| 3280 | ENSG00000065308 | 608.5999051 | 0.77509347   | 0.13306739  | 3.26E-08 | TRAM2      | translocation associated membrane protein 2 [Source:HGNC Symbol;Acc:16855]                                |
| 3281 | ENSG00000156671 | 1821.10841  | -0.541524588 | 0.0929796   | 3.27E-08 | SAMD8      | sterile alpha motif domain containing 8 [Source:HGNC Symbol;Acc:26320]                                    |
| 3282 | ENSG00000113569 | 573.7704133 | -0.803200645 | 0.137947899 | 3.31E-08 | NUP155     | nucleoporin 155kDa [Source:HGNC Symbol;Acc:8063]                                                          |
| 3283 | ENSG00000086189 | 594.9300138 | 0.921259911  | 0.158362704 | 3.41E-08 | DIMT1      | DIM1 dimethyladenosine transferase 1 homolog (S. cerevisiae) [Source:HGNC Symbol;Acc:30217]               |
| 3284 | ENSG00000100941 | 6084.338993 | -0.341865182 | 0.058785051 | 3.44E-08 | PNN        | pinin, desmosome associated protein [Source:HGNC Symbol;Acc:9162]                                         |
| 3285 | ENSG00000124120 | 870.1951975 | -0.682314269 | 0.117335859 | 3.45E-08 | TTPAL      | tocopherol (alpha) transfer protein-like [Source:HGNC Symbol;Acc:16114]                                   |
| 3286 | ENSG00000268397 | 94.40309452 | -1.852556591 | 0.31862055  | 3.47E-08 | AC008443.1 | CDNA: FLJ23158 fis, clone LNG09623; Uncharacterized protein [Source:UniProtKB/TrEMBL;Acc:Q9H5Q9]          |
| 3287 | ENSG00000234475 | 23.46317111 | -3.152288149 | 0.542198988 | 3.47E-08 | HSPA1A     | heat shock 70kDa protein 1A [Source:HGNC Symbol;Acc:5232]                                                 |
| 3288 | ENSG00000105516 | 438.4997516 | -1.014672577 | 0.174555967 | 3.50E-08 | DBP        | D site of albumin promoter (albumin D-box) binding protein [Source:HGNC Symbol;Acc:2697]                  |
| 3289 | ENSG00000172893 | 265.4912337 | -1.289513982 | 0.22186416  | 3.51E-08 | DHCR7      | 7-dehydrocholesterol reductase [Source:HGNC Symbol;Acc:2860]                                              |
| 3290 | ENSG00000147274 | 3661.642276 | 0.379390426  | 0.06527566  | 3.51E-08 | RBMX       | RNA binding motif protein, X-linked [Source:HGNC Symbol;Acc:9910]                                         |
| 3291 | ENSG00000075702 | 201.1300634 | -1.388212535 | 0.238896259 | 3.53E-08 | WDR62      | WD repeat domain 62 [Source:HGNC Symbol;Acc:24502]                                                        |
| 3292 | ENSG00000198081 | 574.6651636 | 0.833581353  | 0.143498594 | 3.57E-08 | ZBTB14     | zinc finger and BTB domain containing 14 [Source:HGNC Symbol;Acc:12860]                                   |
| 3293 | ENSG00000170222 | 222.2700187 | 1.237720238  | 0.213072672 | 3.57E-08 | ADPRM      | ADP-ribose/CDP-alcohol diphosphatase, manganese-dependent [Source:HGNC Symbol;Acc:30925]                  |
| 3294 | ENSG00000130511 | 216.228206  | 1.345622438  | 0.231697941 | 3.60E-08 | SSBP4      | single stranded DNA binding protein 4 [Source:HGNC Symbol;Acc:15676]                                      |
| 3295 | ENSG00000054793 | 391.3965063 | -0.946987315 | 0.163123819 | 3.65E-08 | ATP9A      | ATPase, class II, type 9A [Source:HGNC Symbol;Acc:13540]                                                  |
| 3296 | ENSG00000185262 | 1968.37425  | 0.532132455  | 0.091701134 | 3.70E-08 | UBALD2     | UBA-like domain containing 2 [Source:HGNC Symbol;Acc:28438]                                               |
| 3297 | ENSG00000153006 | 987.9910384 | -0.776866316 | 0.133887863 | 3.71E-08 | SREK1IP1   | SREK1-interacting protein 1 [Source:HGNC Symbol;Acc:26716]                                                |
| 3298 | ENSG00000058668 | 4155.728539 | 0.38147727   | 0.065768008 | 3.76E-08 | ATP2B4     | ATPase, Ca <sup>++</sup> transporting, plasma membrane 4 [Source:HGNC Symbol;Acc:817]                     |

|      |                 |             |              |             |          |            |                                                                                           |
|------|-----------------|-------------|--------------|-------------|----------|------------|-------------------------------------------------------------------------------------------|
| 3299 | ENSG00000145990 | 877.0529415 | -0.743383226 | 0.128167949 | 3.76E-08 | GFOD1      | glucose-fructose oxidoreductase domain containing 1 [Source:HGNC Symbol;Acc:21096]        |
| 3300 | ENSG00000237683 | 11870.22396 | -0.817775064 | 0.140998018 | 3.76E-08 | AL627309.1 | Uncharacterized protein [Source:UniProtKB/TrEMBL;Acc:R4GN28]                              |
| 3301 | ENSG00000223532 | 10461.76747 | 0.79459545   | 0.137025642 | 3.78E-08 | HLA-B      | major histocompatibility complex, class I, B [Source:HGNC Symbol;Acc:4932]                |
| 3302 | ENSG00000255112 | 4527.640581 | 0.365976758  | 0.063136087 | 3.83E-08 | CHMP1B     | charged multivesicular body protein 1B [Source:HGNC Symbol;Acc:24287]                     |
| 3303 | ENSG00000007392 | 1520.123597 | 0.523522388  | 0.090320059 | 3.84E-08 | LUC7L      | LUC7-like ( <i>S. cerevisiae</i> ) [Source:HGNC Symbol;Acc:6723]                          |
| 3304 | ENSG00000127837 | 773.9434711 | 0.699226436  | 0.120676223 | 3.89E-08 | AAMP       | angio-associated, migratory cell protein [Source:HGNC Symbol;Acc:18]                      |
| 3305 | ENSG00000175029 | 1803.056803 | -0.502980978 | 0.086835799 | 3.93E-08 | CTBP2      | C-terminal binding protein 2 [Source:HGNC Symbol;Acc:2495]                                |
| 3306 | ENSG00000204161 | 2685.233415 | -0.451919499 | 0.078021095 | 3.93E-08 | C10orf128  | chromosome 10 open reading frame 128 [Source:HGNC Symbol;Acc:27274]                       |
| 3307 | ENSG00000137496 | 567.1291647 | 0.801467193  | 0.138383442 | 3.94E-08 | IL18BP     | interleukin 18 binding protein [Source:HGNC Symbol;Acc:5987]                              |
| 3308 | ENSG00000110801 | 929.9518085 | -0.655070445 | 0.113124277 | 3.96E-08 | PSMD9      | proteasome (prosome, macropain) 26S subunit, non-ATPase, 9 [Source:HGNC Symbol;Acc:9567]  |
| 3309 | ENSG00000147813 | 1074.45846  | -0.804897211 | 0.139023024 | 3.99E-08 | NAPRT1     | nicotinate phosphoribosyltransferase domain containing 1 [Source:HGNC Symbol;Acc:30450]   |
| 3310 | ENSG00000050767 | 110.588181  | 1.749329089  | 0.30222967  | 4.03E-08 | COL23A1    | collagen, type XXIII, alpha 1 [Source:HGNC Symbol;Acc:22990]                              |
| 3311 | ENSG00000129347 | 846.8159399 | 0.837806775  | 0.144751875 | 4.03E-08 | KRI1       | KRI1 homolog ( <i>S. cerevisiae</i> ) [Source:HGNC Symbol;Acc:25769]                      |
| 3312 | ENSG00000135503 | 542.5944231 | -0.821496413 | 0.141946111 | 4.04E-08 | ACVR1B     | activin A receptor, type IB [Source:HGNC Symbol;Acc:172]                                  |
| 3313 | ENSG00000101310 | 1102.950873 | -0.601701829 | 0.103989818 | 4.07E-08 | SEC23B     | Sec23 homolog B ( <i>S. cerevisiae</i> ) [Source:HGNC Symbol;Acc:10702]                   |
| 3314 | ENSG00000145029 | 580.1986752 | -0.766831292 | 0.13253257  | 4.07E-08 | NICN1      | nicolin 1 [Source:HGNC Symbol;Acc:18317]                                                  |
| 3315 | ENSG00000135898 | 63.61841049 | 2.24734057   | 0.388489561 | 4.10E-08 | GPR55      | G protein-coupled receptor 55 [Source:HGNC Symbol;Acc:4511]                               |
| 3316 | ENSG00000197142 | 1242.459498 | 0.64913096   | 0.112366867 | 4.29E-08 | ACSL5      | acyl-CoA synthetase long-chain family member 5 [Source:HGNC Symbol;Acc:16526]             |
| 3317 | ENSG00000105982 | 119.37321   | -1.796649755 | 0.311007525 | 4.29E-08 | RNF32      | ring finger protein 32 [Source:HGNC Symbol;Acc:17118]                                     |
| 3318 | ENSG00000176845 | 217.8157326 | 1.496227432  | 0.259091774 | 4.34E-08 | METRNL     | meteorin, glial cell differentiation regulator-like [Source:HGNC Symbol;Acc:27584]        |
| 3319 | ENSG00000129680 | 210.3497725 | 1.242405372  | 0.215155815 | 4.35E-08 | MAP7D3     | MAP7 domain containing 3 [Source:HGNC Symbol;Acc:25742]                                   |
| 3320 | ENSG00000107521 | 2598.798756 | -0.462619108 | 0.080144788 | 4.41E-08 | HPS1       | Hermansky-Pudlak syndrome 1 [Source:HGNC Symbol;Acc:5163]                                 |
| 3321 | ENSG00000174749 | 1481.574184 | -0.508575817 | 0.088134674 | 4.46E-08 | C4orf32    | chromosome 4 open reading frame 32 [Source:HGNC Symbol;Acc:26813]                         |
| 3322 | ENSG00000122707 | 191.0134692 | 1.404114171  | 0.243371618 | 4.48E-08 | RECK       | reversion-inducing-cysteine-rich protein with kazal motifs [Source:HGNC Symbol;Acc:11345] |
| 3323 | ENSG00000266472 | 206.475751  | 1.322146735  | 0.229170613 | 4.48E-08 | AC242988.1 |                                                                                           |
| 3324 | ENSG00000198931 | 579.3866111 | 0.868213925  | 0.150502551 | 4.50E-08 | APRT       | adenine phosphoribosyltransferase [Source:HGNC Symbol;Acc:626]                            |
| 3325 | ENSG00000263309 | 715.0018794 | 0.726601031  | 0.125989965 | 4.54E-08 | KRT23      | keratin 23 (histone deacetylase inducible) [Source:HGNC Symbol;Acc:6438]                  |
| 3326 | ENSG00000198736 | 8587.431187 | -0.398883222 | 0.06918985  | 4.59E-08 | MSRB1      | methionine sulfoxide reductase B1 [Source:HGNC Symbol;Acc:14133]                          |

|      |                 |             |              |             |          |           |                                                                                          |
|------|-----------------|-------------|--------------|-------------|----------|-----------|------------------------------------------------------------------------------------------|
| 3327 | ENSG00000109265 | 27.40694857 | -2.993809986 | 0.519360072 | 4.61E-08 | KIAA1211  | KIAA1211 [Source:HGNC Symbol;Acc:29219]                                                  |
| 3328 | ENSG00000184014 | 5588.592157 | 0.431409175  | 0.074854881 | 4.64E-08 | DENND5A   | DENN/MADD domain containing 5A [Source:HGNC Symbol;Acc:19344]                            |
| 3329 | ENSG00000068400 | 2625.7007   | -0.449287007 | 0.077969628 | 4.66E-08 | GRIPAP1   | GRIP1 associated protein 1 [Source:HGNC Symbol;Acc:18706]                                |
| 3330 | ENSG00000184260 | 48.83225849 | -2.365108428 | 0.410503858 | 4.68E-08 | HIST2H2AC | histone cluster 2, H2ac [Source:HGNC Symbol;Acc:4738]                                    |
| 3331 | ENSG00000263521 | 48.83225849 | -2.365108428 | 0.410503858 | 4.68E-08 | HIST2H2AC | histone cluster 2, H2ac [Source:HGNC Symbol;Acc:4738]                                    |
| 3332 | ENSG00000112312 | 220.5139395 | -1.298675026 | 0.225434436 | 4.70E-08 | GMNN      | geminin, DNA replication inhibitor [Source:HGNC Symbol;Acc:17493]                        |
| 3333 | ENSG00000130522 | 3117.71814  | 0.41054352   | 0.071266739 | 4.70E-08 | JUND      | jun D proto-oncogene [Source:HGNC Symbol;Acc:6206]                                       |
| 3334 | ENSG00000147119 | 71.19661983 | 2.160137137  | 0.374981663 | 4.70E-08 | CHST7     | carbohydrate (N-acetylglucosamine 6-O) sulfotransferase 7 [Source:HGNC Symbol;Acc:13817] |
| 3335 | ENSG00000145214 | 552.7095665 | 1.130579887  | 0.196282665 | 4.72E-08 | DGKQ      | diacylglycerol kinase, theta 110kDa [Source:HGNC Symbol;Acc:2856]                        |
| 3336 | ENSG00000130024 | 1092.524496 | 0.612615546  | 0.106360845 | 4.72E-08 | PHF10     | PHD finger protein 10 [Source:HGNC Symbol;Acc:18250]                                     |
| 3337 | ENSG00000138964 | 10131.8768  | -0.330072742 | 0.057340854 | 4.82E-08 | PARVG     | parvin, gamma [Source:HGNC Symbol;Acc:14654]                                             |
| 3338 | ENSG00000026103 | 1061.583884 | 0.60841559   | 0.105735489 | 4.88E-08 | FAS       | Fas cell surface death receptor [Source:HGNC Symbol;Acc:11920]                           |
| 3339 | ENSG00000071539 | 83.57145234 | -2.032655811 | 0.353342727 | 4.92E-08 | TRIP13    | thyroid hormone receptor interactor 13 [Source:HGNC Symbol;Acc:12307]                    |
| 3340 | ENSG00000103264 | 246.2884687 | 1.178462248  | 0.204876418 | 4.94E-08 | FBXO31    | F-box protein 31 [Source:HGNC Symbol;Acc:16510]                                          |
| 3341 | ENSG00000010244 | 6554.760682 | -0.362431517 | 0.063021286 | 4.97E-08 | ZNF207    | zinc finger protein 207 [Source:HGNC Symbol;Acc:12998]                                   |
| 3342 | ENSG00000108244 | 714.8344308 | 0.724751761  | 0.126023514 | 4.97E-08 | KRT23     | keratin 23 (histone deacetylase inducible) [Source:HGNC Symbol;Acc:6438]                 |
| 3343 | ENSG00000153975 | 345.9892369 | -0.994185237 | 0.172897786 | 4.99E-08 | ZUFSP     | zinc finger with UFM1-specific peptidase domain [Source:HGNC Symbol;Acc:21224]           |
| 3344 | ENSG00000140451 | 124.0600953 | -1.610883943 | 0.280369278 | 5.13E-08 | PIF1      | PIF1 5'-to-3' DNA helicase [Source:HGNC Symbol;Acc:26220]                                |
| 3345 | ENSG00000103018 | 722.0450411 | 0.73869089   | 0.128576982 | 5.14E-08 | CYB5B     | cytochrome b5 type B (outer mitochondrial membrane) [Source:HGNC Symbol;Acc:24374]       |
| 3346 | ENSG00000236609 | 72.08365663 | 2.132401433  | 0.371227777 | 5.17E-08 | ZNF853    | zinc finger protein 853 [Source:HGNC Symbol;Acc:21767]                                   |
| 3347 | ENSG00000118873 | 1189.735338 | -0.699189064 | 0.121734757 | 5.18E-08 | RAB3GAP2  | RAB3 GTPase activating protein subunit 2 (non-catalytic) [Source:HGNC Symbol;Acc:17168]  |
| 3348 | ENSG00000110422 | 4646.154859 | 0.359455457  | 0.062599799 | 5.23E-08 | HIPK3     | homeodomain interacting protein kinase 3 [Source:HGNC Symbol;Acc:4915]                   |
| 3349 | ENSG00000015479 | 4487.411912 | 0.401774208  | 0.070010087 | 5.33E-08 | MATR3     | matrin 3 [Source:HGNC Symbol;Acc:6912]                                                   |
| 3350 | ENSG00000129515 | 2264.073235 | 0.45271366   | 0.078903762 | 5.37E-08 | SNX6      | sorting nexin 6 [Source:HGNC Symbol;Acc:14970]                                           |
| 3351 | ENSG00000169764 | 2368.586224 | -0.457887266 | 0.07987473  | 5.52E-08 | UGP2      | UDP-glucose pyrophosphorylase 2 [Source:HGNC Symbol;Acc:12527]                           |
| 3352 | ENSG00000143772 | 2643.635609 | 0.418937918  | 0.073081863 | 5.53E-08 | ITPKB     | inositol-trisphosphate 3-kinase B [Source:HGNC Symbol;Acc:6179]                          |
| 3353 | ENSG00000162636 | 832.5891845 | -0.666266254 | 0.116233326 | 5.53E-08 | FAM102B   | family with sequence similarity 102, member B [Source:HGNC Symbol;Acc:27637]             |
| 3354 | ENSG00000123329 | 14472.70083 | -0.276453048 | 0.048236981 | 5.57E-08 | ARHGAP9   | Rho GTPase activating protein 9 [Source:HGNC Symbol;Acc:14130]                           |

|      |                 |             |              |             |          |          |                                                                                               |
|------|-----------------|-------------|--------------|-------------|----------|----------|-----------------------------------------------------------------------------------------------|
| 3355 | ENSG00000182400 | 1239.138362 | -0.573655107 | 0.100120892 | 5.61E-08 | TRAPPC6B | trafficking protein particle complex 6B [Source:HGNC Symbol;Acc:23066]                        |
| 3356 | ENSG00000158615 | 3397.378218 | -0.379156906 | 0.06619385  | 5.67E-08 | PPP1R15B | protein phosphatase 1, regulatory subunit 15B [Source:HGNC Symbol;Acc:14951]                  |
| 3357 | ENSG00000163486 | 917.4976115 | -0.814348911 | 0.142173313 | 5.67E-08 | SRGAP2   | SLIT-ROBO Rho GTPase activating protein 2 [Source:HGNC Symbol;Acc:19751]                      |
| 3358 | ENSG00000164430 | 383.7593871 | -0.960116537 | 0.16763442  | 5.68E-08 | MB21D1   | Mab-21 domain containing 1 [Source:HGNC Symbol;Acc:21367]                                     |
| 3359 | ENSG00000185811 | 7108.89603  | -0.349158346 | 0.060967595 | 5.70E-08 | IKZF1    | IKAROS family zinc finger 1 (Ikaros) [Source:HGNC Symbol;Acc:13176]                           |
| 3360 | ENSG00000112511 | 577.5410988 | -0.825793512 | 0.144212036 | 5.72E-08 | PHF1     | PHD finger protein 1 [Source:HGNC Symbol;Acc:8919]                                            |
| 3361 | ENSG00000154330 | 291.1908472 | 1.146714437  | 0.200364799 | 5.82E-08 | PGM5     | phosphoglucomutase 5 [Source:HGNC Symbol;Acc:8908]                                            |
| 3362 | ENSG00000240247 | 233598.4211 | -1.570557264 | 0.27448754  | 5.87E-08 | DEFA1B   | defensin, alpha 1B [Source:HGNC Symbol;Acc:33596]                                             |
| 3363 | ENSG00000133422 | 579.982984  | 0.937233665  | 0.16386721  | 5.95E-08 | MORC2    | MORC family CW-type zinc finger 2 [Source:HGNC Symbol;Acc:23573]                              |
| 3364 | ENSG00000031698 | 1757.469717 | 0.485680994  | 0.084939885 | 6.00E-08 | SARS     | seryl-tRNA synthetase [Source:HGNC Symbol;Acc:10537]                                          |
| 3365 | ENSG00000161544 | 58.36192417 | 2.257793761  | 0.394880394 | 6.01E-08 | CYGB     | cytoglobin [Source:HGNC Symbol;Acc:16505]                                                     |
| 3366 | ENSG00000064547 | 5125.930571 | -0.364193376 | 0.063715879 | 6.07E-08 | LPAR2    | lysophosphatidic acid receptor 2 [Source:HGNC Symbol;Acc:3168]                                |
| 3367 | ENSG00000168614 | 1502.065096 | -0.520657619 | 0.091090688 | 6.07E-08 | NBPF9    | neuroblastoma breakpoint family, member 9 [Source:HGNC Symbol;Acc:31991]                      |
| 3368 | ENSG00000176749 | 405.7431294 | 0.955659476  | 0.167219531 | 6.10E-08 | CDK5R1   | cyclin-dependent kinase 5, regulatory subunit 1 (p35) [Source:HGNC Symbol;Acc:1775]           |
| 3369 | ENSG00000134900 | 1782.172298 | 0.566407835  | 0.099130605 | 6.14E-08 | TPP2     | tripeptidyl peptidase II [Source:HGNC Symbol;Acc:12016]                                       |
| 3370 | ENSG00000136807 | 1350.748787 | 0.577395706  | 0.101077788 | 6.19E-08 | CDK9     | cyclin-dependent kinase 9 [Source:HGNC Symbol;Acc:1780]                                       |
| 3371 | ENSG00000187323 | 78.70550295 | -1.885133117 | 0.330011567 | 6.19E-08 | DCC      | deleted in colorectal carcinoma [Source:HGNC Symbol;Acc:2701]                                 |
| 3372 | ENSG00000069020 | 189.0373408 | 1.349718484  | 0.23631465  | 6.21E-08 | MAST4    | microtubule associated serine/threonine kinase family member 4 [Source:HGNC Symbol;Acc:19037] |
| 3373 | ENSG00000185651 | 2196.671659 | -0.429829446 | 0.075291552 | 6.31E-08 | UBE2L3   | ubiquitin-conjugating enzyme E2L 3 [Source:HGNC Symbol;Acc:12488]                             |
| 3374 | ENSG00000022567 | 2707.769749 | 0.472933773  | 0.082868001 | 6.37E-08 | SLC45A4  | solute carrier family 45, member 4 [Source:HGNC Symbol;Acc:29196]                             |
| 3375 | ENSG00000167778 | 822.4285782 | 0.674331782  | 0.118182022 | 6.42E-08 | SPRYD3   | SPRY domain containing 3 [Source:HGNC Symbol;Acc:25920]                                       |
| 3376 | ENSG00000269380 | 50.75229347 | -2.251081941 | 0.3945979   | 6.46E-08 | XK       | X-linked Kx blood group (McLeod syndrome) [Source:HGNC Symbol;Acc:12811]                      |
| 3377 | ENSG00000170837 | 663.9805706 | -0.773558271 | 0.135602229 | 6.46E-08 | GPR27    | G protein-coupled receptor 27 [Source:HGNC Symbol;Acc:4482]                                   |
| 3378 | ENSG00000102554 | 738.8038791 | -2.101293578 | 0.36850131  | 6.55E-08 | KLF5     | Kruppel-like factor 5 (intestinal) [Source:HGNC Symbol;Acc:6349]                              |
| 3379 | ENSG00000148481 | 767.0724667 | -0.700089854 | 0.122809064 | 6.61E-08 | FAM188A  | family with sequence similarity 188, member A [Source:HGNC Symbol;Acc:23578]                  |
| 3380 | ENSG00000179218 | 4375.53959  | -0.336409094 | 0.059016692 | 6.62E-08 | CALR     | calreticulin [Source:HGNC Symbol;Acc:1455]                                                    |
| 3381 | ENSG00000150401 | 561.4999176 | -0.817854347 | 0.143508033 | 6.67E-08 | DCUN1D2  | DCN1, defective in cullin neddylation 1, domain containing 2 [Source:HGNC Symbol;Acc:20328]   |
| 3382 | ENSG00000198133 | 278.4998846 | 1.137158566  | 0.199546777 | 6.68E-08 | TMEM229B | transmembrane protein 229B [Source:HGNC Symbol;Acc:20130]                                     |

|      |                 |             |              |             |          |             |                                                                                      |
|------|-----------------|-------------|--------------|-------------|----------|-------------|--------------------------------------------------------------------------------------|
| 3383 | ENSG00000111321 | 730.5307276 | 0.738040449  | 0.129520891 | 6.70E-08 | LTBR        | lymphotoxin beta receptor (TNFR superfamily, member 3) [Source:HGNC Symbol;Acc:6718] |
| 3384 | ENSG00000139631 | 2713.049794 | -0.40101696  | 0.070376242 | 6.70E-08 | CSAD        | cysteine sulfinic acid decarboxylase [Source:HGNC Symbol;Acc:18966]                  |
| 3385 | ENSG00000185480 | 146.5972401 | -1.413658691 | 0.248109155 | 6.71E-08 | PARPBP      | PARP1 binding protein [Source:HGNC Symbol;Acc:26074]                                 |
| 3386 | ENSG00000196227 | 1139.527235 | -0.58575406  | 0.102815893 | 6.73E-08 | FAM217B     | family with sequence similarity 217, member B [Source:HGNC Symbol;Acc:16170]         |
| 3387 | ENSG00000140932 | 3960.68355  | 0.395887597  | 0.069532705 | 6.87E-08 | CMTM2       | CKLF-like MARVEL transmembrane domain containing 2 [Source:HGNC Symbol;Acc:19173]    |
| 3388 | ENSG00000108309 | 45.47092205 | 2.431651202  | 0.427124755 | 6.89E-08 | RUNDC3A     | RUN domain containing 3A [Source:HGNC Symbol;Acc:16984]                              |
| 3389 | ENSG00000164048 | 1232.246777 | -0.609593261 | 0.107129326 | 7.00E-08 | ZNF589      | zinc finger protein 589 [Source:HGNC Symbol;Acc:16747]                               |
| 3390 | ENSG00000126264 | 1648.221353 | -0.543021185 | 0.095434254 | 7.01E-08 | HCST        | hematopoietic cell signal transducer [Source:HGNC Symbol;Acc:16977]                  |
| 3391 | ENSG00000235328 | 53.8038977  | -2.324116418 | 0.408480948 | 7.03E-08 | AC006946.12 |                                                                                      |
| 3392 | ENSG00000196975 | 1212.222907 | -0.571839841 | 0.100506723 | 7.03E-08 | ANXA4       | annexin A4 [Source:HGNC Symbol;Acc:542]                                              |
| 3393 | ENSG00000142634 | 8885.017064 | 0.446086457  | 0.078431225 | 7.11E-08 | EFHD2       | EF-hand domain family, member D2 [Source:HGNC Symbol;Acc:28670]                      |
| 3394 | ENSG00000116675 | 62.48278848 | -2.375455435 | 0.417758644 | 7.16E-08 | DNAJC6      | DnaJ (Hsp40) homolog, subfamily C, member 6 [Source:HGNC Symbol;Acc:15469]           |
| 3395 | ENSG00000001036 | 586.5204741 | -0.837545847 | 0.147298413 | 7.17E-08 | FUCA2       | fucosidase, alpha-L- 2, plasma [Source:HGNC Symbol;Acc:4008]                         |
| 3396 | ENSG00000047634 | 127.1187141 | 1.665030454  | 0.292855371 | 7.19E-08 | SCML1       | sex comb on midleg-like 1 (Drosophila) [Source:HGNC Symbol;Acc:10580]                |
| 3397 | ENSG00000007341 | 233.1380796 | -1.216800953 | 0.214076357 | 7.25E-08 | ST7L        | suppression of tumorigenicity 7 like [Source:HGNC Symbol;Acc:18441]                  |
| 3398 | ENSG00000042445 | 1092.953272 | -0.657773882 | 0.115745144 | 7.29E-08 | RETSAT      | retinol saturase (all-trans-retinol 13,14-reductase) [Source:HGNC Symbol;Acc:25991]  |
| 3399 | ENSG00000182247 | 49.61284618 | 2.359617914  | 0.415335634 | 7.36E-08 | UBE2E2      | ubiquitin-conjugating enzyme E2E 2 [Source:HGNC Symbol;Acc:12478]                    |
| 3400 | ENSG00000121671 | 527.8331909 | 0.818182898  | 0.144165837 | 7.62E-08 | CRY2        | cryptochrome 2 (photolyase-like) [Source:HGNC Symbol;Acc:2385]                       |
| 3401 | ENSG00000182504 | 708.6269324 | -0.699715316 | 0.123293188 | 7.62E-08 | CEP97       | centrosomal protein 97kDa [Source:HGNC Symbol;Acc:26244]                             |
| 3402 | ENSG00000175727 | 2419.899821 | 0.65041866   | 0.114651725 | 7.72E-08 | MLXIP       | MLX interacting protein [Source:HGNC Symbol;Acc:17055]                               |
| 3403 | ENSG00000149554 | 256.3636179 | -1.224419803 | 0.216019692 | 7.94E-08 | CHEK1       | checkpoint kinase 1 [Source:HGNC Symbol;Acc:1925]                                    |
| 3404 | ENSG00000174238 | 2720.394182 | 0.429133491  | 0.075712426 | 7.95E-08 | PITPNA      | phosphatidylinositol transfer protein, alpha [Source:HGNC Symbol;Acc:9001]           |
| 3405 | ENSG00000078804 | 1049.774112 | -0.623244364 | 0.109977692 | 7.99E-08 | TP53INP2    | tumor protein p53 inducible nuclear protein 2 [Source:HGNC Symbol;Acc:16104]         |
| 3406 | ENSG00000211787 | 47.07586836 | 2.534372897  | 0.44730242  | 8.04E-08 | TRAV8-3     | T cell receptor alpha variable 8-3 [Source:HGNC Symbol;Acc:12148]                    |
| 3407 | ENSG00000135363 | 1703.517851 | -0.509987655 | 0.090020064 | 8.06E-08 | LMO2        | LIM domain only 2 (rhombotin-like 1) [Source:HGNC Symbol;Acc:6642]                   |
| 3408 | ENSG00000163659 | 591.5041957 | 0.782815916  | 0.138224561 | 8.15E-08 | TIPARP      | TCDD-inducible poly(ADP-ribose) polymerase [Source:HGNC Symbol;Acc:23696]            |
| 3409 | ENSG00000047597 | 51.02362452 | -2.226927759 | 0.393232691 | 8.16E-08 | XK          | X-linked Kx blood group (McLeod syndrome) [Source:HGNC Symbol;Acc:12811]             |
| 3410 | ENSG00000120685 | 1234.646634 | -0.710452517 | 0.125452759 | 8.16E-08 | PROSER1     | proline and serine rich 1 [Source:HGNC Symbol;Acc:20291]                             |



|      |                 |             |              |             |          |            |                                                                                                    |
|------|-----------------|-------------|--------------|-------------|----------|------------|----------------------------------------------------------------------------------------------------|
| 3411 | ENSG00000272611 | 152.8164968 | -1.426800537 | 0.251960945 | 8.17E-08 | CEACAM3    | carcinoembryonic antigen-related cell adhesion molecule 3 [Source:HGNC Symbol;Acc:1815]            |
| 3412 | ENSG00000267910 | 1458.452214 | 0.614044625  | 0.108444197 | 8.19E-08 | KMT2A      | lysine (K)-specific methyltransferase 2A [Source:HGNC Symbol;Acc:7132]                             |
| 3413 | ENSG00000101182 | 2645.837608 | -0.409529473 | 0.07232776  | 8.20E-08 | PSMA7      | proteasome (prosome, macropain) subunit, alpha type, 7 [Source:HGNC Symbol;Acc:9536]               |
| 3414 | ENSG00000110218 | 125.1292986 | 1.585375346  | 0.280129629 | 8.32E-08 | PANX1      | pannexin 1 [Source:HGNC Symbol;Acc:8599]                                                           |
| 3415 | ENSG00000102910 | 2684.404259 | -0.405506725 | 0.071651941 | 8.32E-08 | LONP2      | lon peptidase 2, peroxisomal [Source:HGNC Symbol;Acc:20598]                                        |
| 3416 | ENSG00000118058 | 1458.799853 | 0.613548604  | 0.108433322 | 8.38E-08 | KMT2A      | lysine (K)-specific methyltransferase 2A [Source:HGNC Symbol;Acc:7132]                             |
| 3417 | ENSG00000169629 | 207.9450177 | -1.289113796 | 0.227941293 | 8.51E-08 | RGPD8      | RANBP2-like and GRIP domain containing 8 [Source:HGNC Symbol;Acc:9849]                             |
| 3418 | ENSG00000085063 | 1683.673491 | -0.566605093 | 0.10021171  | 8.58E-08 | CD59       | CD59 molecule, complement regulatory protein [Source:HGNC Symbol;Acc:1689]                         |
| 3419 | ENSG00000186462 | 59.0467651  | 2.311000402  | 0.408916666 | 8.70E-08 | NAP1L2     | nucleosome assembly protein 1-like 2 [Source:HGNC Symbol;Acc:7638]                                 |
| 3420 | ENSG00000164440 | 68.43003614 | 2.075659021  | 0.367311592 | 8.73E-08 | TXLNB      | taxilin beta [Source:HGNC Symbol;Acc:21617]                                                        |
| 3421 | ENSG00000255103 | 107.9413004 | -1.660211603 | 0.293842555 | 8.78E-08 | KIAA0754   | KIAA0754 [Source:HGNC Symbol;Acc:29111]                                                            |
| 3422 | ENSG00000173511 | 192.2131633 | 1.343167552  | 0.237786306 | 8.84E-08 | VEGFB      | vascular endothelial growth factor B [Source:HGNC Symbol;Acc:12681]                                |
| 3423 | ENSG00000156711 | 1286.340436 | -0.61182444  | 0.108337264 | 8.91E-08 | MAPK13     | mitogen-activated protein kinase 13 [Source:HGNC Symbol;Acc:6875]                                  |
| 3424 | ENSG00000128274 | 29.5229559  | -2.826627859 | 0.501130323 | 9.27E-08 | A4GALT     | alpha 1,4-galactosyltransferase [Source:HGNC Symbol;Acc:18149]                                     |
| 3425 | ENSG00000214425 | 1673.692243 | -0.491063402 | 0.087076509 | 9.32E-08 | LRRRC37A4P | leucine rich repeat containing 37, member A4, pseudogene [Source:HGNC Symbol;Acc:25479]            |
| 3426 | ENSG00000100814 | 320.0492562 | 0.984037891  | 0.174544478 | 9.41E-08 | CCNB1IP1   | cyclin B1 interacting protein 1, E3 ubiquitin protein ligase [Source:HGNC Symbol;Acc:19437]        |
| 3427 | ENSG00000089351 | 2534.888649 | -0.500087224 | 0.088711203 | 9.44E-08 | GRAMD1A    | GRAM domain containing 1A [Source:HGNC Symbol;Acc:29305]                                           |
| 3428 | ENSG00000146223 | 1744.06418  | 0.477474367  | 0.084702561 | 9.44E-08 | RPL7L1     | ribosomal protein L7-like 1 [Source:HGNC Symbol;Acc:21370]                                         |
| 3429 | ENSG00000114735 | 585.0230064 | 0.775690607  | 0.137631686 | 9.50E-08 | HEMK1      | HemK methyltransferase family member 1 [Source:HGNC Symbol;Acc:24923]                              |
| 3430 | ENSG00000215378 | 115.828791  | -1.630001079 | 0.289271264 | 9.56E-08 | DEFT1P     | defensin, theta 1 pseudogene [Source:HGNC Symbol;Acc:18339]                                        |
| 3431 | ENSG00000244509 | 1659.789484 | 0.495367101  | 0.087929746 | 9.62E-08 | APOBEC3C   | apolipoprotein B mRNA editing enzyme, catalytic polypeptide-like 3C [Source:HGNC Symbol;Acc:17353] |
| 3432 | ENSG00000159423 | 251.6819045 | -1.157513546 | 0.20555981  | 9.77E-08 | ALDH4A1    | aldehyde dehydrogenase 4 family, member A1 [Source:HGNC Symbol;Acc:406]                            |
| 3433 | ENSG00000166887 | 3617.117923 | -0.397246269 | 0.070551161 | 9.79E-08 | VPS39      | vacuolar protein sorting 39 homolog (S. cerevisiae) [Source:HGNC Symbol;Acc:20593]                 |
| 3434 | ENSG00000104343 | 2291.492489 | -0.462524044 | 0.082170515 | 9.89E-08 | UBE2W      | ubiquitin-conjugating enzyme E2W (putative) [Source:HGNC Symbol;Acc:25616]                         |
| 3435 | ENSG00000128908 | 814.8975892 | 0.806090029  | 0.143216101 | 9.90E-08 | INO80      | INO80 complex subunit [Source:HGNC Symbol;Acc:26956]                                               |
| 3436 | ENSG00000213551 | 686.6450025 | -0.706511169 | 0.125526565 | 9.91E-08 | DNAJC9     | DnaJ (Hsp40) homolog, subfamily C, member 9 [Source:HGNC Symbol;Acc:19123]                         |
| 3437 | ENSG00000101337 | 1531.928538 | 0.516691708  | 0.091831091 | 1.00E-07 | TM9SF4     | transmembrane 9 superfamily protein member 4 [Source:HGNC Symbol;Acc:30797]                        |
| 3438 | ENSG00000106617 | 880.3598762 | 0.676729144  | 0.120282043 | 1.00E-07 | PRKAG2     | protein kinase, AMP-activated, gamma 2 non-catalytic subunit [Source:HGNC Symbol;Acc:9386]         |

|      |                 |             |              |             |          |          |                                                                                                   |
|------|-----------------|-------------|--------------|-------------|----------|----------|---------------------------------------------------------------------------------------------------|
| 3439 | ENSG00000071537 | 2579.906913 | -0.407902816 | 0.072526127 | 1.01E-07 | SEL1L    | sel-1 suppressor of lin-12-like (C. elegans) [Source:HGNC Symbol;Acc:10717]                       |
| 3440 | ENSG00000177721 | 353.9592684 | 0.980246115  | 0.174319749 | 1.02E-07 | ANXA2R   | annexin A2 receptor [Source:HGNC Symbol;Acc:33463]                                                |
| 3441 | ENSG00000143882 | 124.9951744 | -1.681164824 | 0.298995455 | 1.02E-07 | ATP6V1C2 | ATPase, H+ transporting, lysosomal 42kDa, V1 subunit C2 [Source:HGNC Symbol;Acc:18264]            |
| 3442 | ENSG00000154380 | 117.8221289 | 1.653862156  | 0.294189398 | 1.03E-07 | ENAH     | enabled homolog (Drosophila) [Source:HGNC Symbol;Acc:18271]                                       |
| 3443 | ENSG00000115657 | 247.8466155 | -1.118914871 | 0.199041452 | 1.03E-07 | ABCB6    | ATP-binding cassette, sub-family B (MDR/TAP), member 6 [Source:HGNC Symbol;Acc:47]                |
| 3444 | ENSG00000117298 | 3930.815848 | -0.412880291 | 0.073451306 | 1.03E-07 | ECE1     | endothelin converting enzyme 1 [Source:HGNC Symbol;Acc:3146]                                      |
| 3445 | ENSG00000168878 | 136.1791304 | -1.532361996 | 0.272631334 | 1.03E-07 | SFTPB    | surfactant protein B [Source:HGNC Symbol;Acc:10801]                                               |
| 3446 | ENSG00000224740 | 2066.14761  | -0.441007357 | 0.078491135 | 1.05E-07 | FLOT1    | flotillin 1 [Source:HGNC Symbol;Acc:3757]                                                         |
| 3447 | ENSG00000242221 | 111.7924783 | -1.612368445 | 0.287004238 | 1.05E-07 | PSG2     | pregnancy specific beta-1-glycoprotein 2 [Source:HGNC Symbol;Acc:9519]                            |
| 3448 | ENSG00000168495 | 349.1058867 | 1.152633892  | 0.205222038 | 1.06E-07 | POLR3D   | polymerase (RNA) III (DNA directed) polypeptide D, 44kDa [Source:HGNC Symbol;Acc:1080]            |
| 3449 | ENSG00000137760 | 144.7512669 | 1.478927214  | 0.263393209 | 1.07E-07 | ALKBH8   | alkB, alkylation repair homolog 8 (E. coli) [Source:HGNC Symbol;Acc:25189]                        |
| 3450 | ENSG00000188672 | 30.9373886  | -2.702388139 | 0.481452094 | 1.08E-07 | RHCE     | Rh blood group, CcEe antigens [Source:HGNC Symbol;Acc:10008]                                      |
| 3451 | ENSG00000125686 | 1146.279445 | 0.58060187   | 0.103455926 | 1.08E-07 | MED1     | mediator complex subunit 1 [Source:HGNC Symbol;Acc:9234]                                          |
| 3452 | ENSG00000035115 | 458.969693  | 0.92928554   | 0.165605207 | 1.09E-07 | SH3YL1   | SH3 and SYLF domain containing 1 [Source:HGNC Symbol;Acc:29546]                                   |
| 3453 | ENSG00000108883 | 1977.978909 | -0.478630438 | 0.08530216  | 1.09E-07 | EFTUD2   | elongation factor Tu GTP binding domain containing 2 [Source:HGNC Symbol;Acc:30858]               |
| 3454 | ENSG00000167468 | 1173.117213 | 0.619172206  | 0.110363851 | 1.09E-07 | GPX4     | glutathione peroxidase 4 [Source:HGNC Symbol;Acc:4556]                                            |
| 3455 | ENSG00000172775 | 3489.992422 | -0.37983927  | 0.067720423 | 1.10E-07 | FAM192A  | family with sequence similarity 192, member A [Source:HGNC Symbol;Acc:29856]                      |
| 3456 | ENSG00000163902 | 3424.477067 | 0.366780963  | 0.06539878  | 1.11E-07 | RPN1     | ribophorin I [Source:HGNC Symbol;Acc:10381]                                                       |
| 3457 | ENSG00000004455 | 2546.759948 | -0.456491517 | 0.081403387 | 1.11E-07 | AK2      | adenylate kinase 2 [Source:HGNC Symbol;Acc:362]                                                   |
| 3458 | ENSG00000211779 | 43.686094   | 2.486744789  | 0.443462374 | 1.11E-07 | TRAV5    | T cell receptor alpha variable 5 [Source:HGNC Symbol;Acc:12143]                                   |
| 3459 | ENSG00000174437 | 2106.262343 | -0.459782442 | 0.082036418 | 1.13E-07 | ATP2A2   | ATPase, Ca++ transporting, cardiac muscle, slow twitch 2 [Source:HGNC Symbol;Acc:812]             |
| 3460 | ENSG00000148459 | 138.8875999 | -1.425303656 | 0.254309929 | 1.13E-07 | PDS1     | prenyl (decaprenyl) diphosphate synthase, subunit 1 [Source:HGNC Symbol;Acc:17759]                |
| 3461 | ENSG00000177548 | 199.7833835 | 1.391381231  | 0.248337682 | 1.14E-07 | RABEP2   | rabaptin, RAB GTPase binding effector protein 2 [Source:HGNC Symbol;Acc:24817]                    |
| 3462 | ENSG00000133067 | 108.9254995 | 1.862901107  | 0.332504069 | 1.14E-07 | LGR6     | leucine-rich repeat containing G protein-coupled receptor 6 [Source:HGNC Symbol;Acc:19719]        |
| 3463 | ENSG00000185432 | 834.8325672 | 0.686727087  | 0.122577985 | 1.14E-07 | METTL7A  | methyltransferase like 7A [Source:HGNC Symbol;Acc:24550]                                          |
| 3464 | ENSG00000088726 | 60.52596067 | 2.150599009  | 0.384088671 | 1.16E-07 | TMEM40   | transmembrane protein 40 [Source:HGNC Symbol;Acc:25620]                                           |
| 3465 | ENSG00000157014 | 1993.072551 | -0.488839974 | 0.087319556 | 1.17E-07 | TATDN2   | TatD DNase domain containing 2 [Source:HGNC Symbol;Acc:28988]                                     |
| 3466 | ENSG00000169255 | 93.93526795 | -1.753666135 | 0.313265789 | 1.17E-07 | B3GALNT1 | beta-1,3-N-acetylgalactosaminyltransferase 1 (globoside blood group) [Source:HGNC Symbol;Acc:918] |

|      |                 |             |              |             |          |          |                                                                                             |
|------|-----------------|-------------|--------------|-------------|----------|----------|---------------------------------------------------------------------------------------------|
| 3467 | ENSG00000198771 | 6695.507874 | 0.293482755  | 0.052453946 | 1.19E-07 | RCS D1   | RCS D domain containing 1 [Source:HGNC Symbol;Acc:28310]                                    |
| 3468 | ENSG00000148396 | 3152.300822 | -0.383678262 | 0.068599871 | 1.20E-07 | SEC16A   | SEC16 homolog A ( <i>S. cerevisiae</i> ) [Source:HGNC Symbol;Acc:29006]                     |
| 3469 | ENSG00000090975 | 232.1277941 | 1.288631758  | 0.230436993 | 1.21E-07 | PITPNM2  | phosphatidylinositol transfer protein, membrane-associated 2 [Source:HGNC Symbol;Acc:21044] |
| 3470 | ENSG00000074370 | 8718.756658 | -0.477272483 | 0.085374543 | 1.22E-07 | ATP2A3   | ATPase, Ca <sup>++</sup> transporting, ubiquitous [Source:HGNC Symbol;Acc:813]              |
| 3471 | ENSG00000186635 | 10995.56912 | -0.379898232 | 0.067959624 | 1.22E-07 | ARAP1    | ArfGAP with RhoGAP domain, ankyrin repeat and PH domain 1 [Source:HGNC Symbol;Acc:16925]    |
| 3472 | ENSG00000241553 | 6768.744567 | -0.312795955 | 0.055968545 | 1.23E-07 | ARPC4    | actin related protein 2/3 complex, subunit 4, 20kDa [Source:HGNC Symbol;Acc:707]            |
| 3473 | ENSG00000163219 | 9761.708561 | 0.305489171  | 0.054700642 | 1.26E-07 | ARHGAP25 | Rho GTPase activating protein 25 [Source:HGNC Symbol;Acc:28951]                             |
| 3474 | ENSG00000178209 | 1397.17879  | -0.6353005   | 0.113797021 | 1.28E-07 | PLEC     | plectin [Source:HGNC Symbol;Acc:9069]                                                       |
| 3475 | ENSG00000177885 | 7346.921121 | -0.305978212 | 0.054812899 | 1.28E-07 | GRB2     | growth factor receptor-bound protein 2 [Source:HGNC Symbol;Acc:4566]                        |
| 3476 | ENSG00000261109 | 1395.65515  | -0.634911227 | 0.113745027 | 1.28E-07 | PLEC     | plectin [Source:HGNC Symbol;Acc:9069]                                                       |
| 3477 | ENSG00000197841 | 170.2721241 | 1.387798552  | 0.248654432 | 1.29E-07 | ZNF181   | zinc finger protein 181 [Source:HGNC Symbol;Acc:12971]                                      |
| 3478 | ENSG00000167323 | 2481.509281 | -0.467996042 | 0.083858293 | 1.29E-07 | STIM1    | stromal interaction molecule 1 [Source:HGNC Symbol;Acc:11386]                               |
| 3479 | ENSG00000268123 | 203.0836934 | 1.266618769  | 0.227038073 | 1.30E-07 | C12orf57 | chromosome 12 open reading frame 57 [Source:HGNC Symbol;Acc:29521]                          |
| 3480 | ENSG00000156521 | 295.9845851 | 1.085388657  | 0.19456582  | 1.30E-07 | TYSND1   | trypsin domain containing 1 [Source:HGNC Symbol;Acc:28531]                                  |
| 3481 | ENSG00000184634 | 2269.784811 | -0.46678579  | 0.083680616 | 1.31E-07 | MED12    | mediator complex subunit 12 [Source:HGNC Symbol;Acc:11957]                                  |
| 3482 | ENSG00000268501 | 565.2287796 | -0.886413673 | 0.158907589 | 1.31E-07 | CCDC22   | coiled-coil domain containing 22 [Source:HGNC Symbol;Acc:28909]                             |
| 3483 | ENSG00000074054 | 1589.698744 | -0.498584008 | 0.089416654 | 1.32E-07 | CLASP1   | cytoplasmic linker associated protein 1 [Source:HGNC Symbol;Acc:17088]                      |
| 3484 | ENSG00000124496 | 1769.614362 | 0.471639139  | 0.084584978 | 1.32E-07 | TRERF1   | transcriptional regulating factor 1 [Source:HGNC Symbol;Acc:18273]                          |
| 3485 | ENSG00000175197 | 1220.536306 | -0.552870484 | 0.099167274 | 1.33E-07 | DDIT3    | DNA-damage-inducible transcript 3 [Source:HGNC Symbol;Acc:2726]                             |
| 3486 | ENSG00000164151 | 1072.82746  | 0.600489856  | 0.107754266 | 1.35E-07 | KIAA0947 | KIAA0947 [Source:HGNC Symbol;Acc:29154]                                                     |
| 3487 | ENSG00000157107 | 1201.565433 | 0.637987144  | 0.11449042  | 1.35E-07 | FCHO2    | FCH domain only 2 [Source:HGNC Symbol;Acc:25180]                                            |
| 3488 | ENSG00000197586 | 510.216773  | 0.906243895  | 0.162667637 | 1.36E-07 | ENTPD6   | ectonucleoside triphosphate diphosphohydrolase 6 (putative) [Source:HGNC Symbol;Acc:3368]   |
| 3489 | ENSG00000028528 | 4135.806279 | -0.404725915 | 0.072655623 | 1.36E-07 | SNX1     | sorting nexin 1 [Source:HGNC Symbol;Acc:11172]                                              |
| 3490 | ENSG00000108175 | 2578.301499 | 0.633307661  | 0.113695327 | 1.36E-07 | ZMIZ1    | zinc finger, MIZ-type containing 1 [Source:HGNC Symbol;Acc:16493]                           |
| 3491 | ENSG00000112679 | 1917.604461 | -0.462071355 | 0.082965879 | 1.37E-07 | DUSP22   | dual specificity phosphatase 22 [Source:HGNC Symbol;Acc:16077]                              |
| 3492 | ENSG00000013583 | 334.3057279 | -1.036650039 | 0.186137353 | 1.37E-07 | HEBP1    | heme binding protein 1 [Source:HGNC Symbol;Acc:17176]                                       |
| 3493 | ENSG00000152684 | 338.4823604 | -0.981142969 | 0.176278202 | 1.40E-07 | PELO     | pelota homolog ( <i>Drosophila</i> ) [Source:HGNC Symbol;Acc:8829]                          |
| 3494 | ENSG00000132952 | 855.0510967 | 0.635652921  | 0.114223226 | 1.40E-07 | USP1     | ubiquitin specific peptidase like 1 [Source:HGNC Symbol;Acc:20294]                          |

|      |                 |             |              |             |          |           |                                                                                                                              |
|------|-----------------|-------------|--------------|-------------|----------|-----------|------------------------------------------------------------------------------------------------------------------------------|
| 3495 | ENSG00000143393 | 2708.067616 | -0.40041283  | 0.071966479 | 1.41E-07 | PI4KB     | phosphatidylinositol 4-kinase, catalytic, beta [Source:HGNC Symbol;Acc:8984]                                                 |
| 3496 | ENSG00000131941 | 174.6864423 | -1.313723686 | 0.236149799 | 1.42E-07 | RHPN2     | rhophilin, Rho GTPase binding protein 2 [Source:HGNC Symbol;Acc:19974]                                                       |
| 3497 | ENSG00000152223 | 1716.103574 | -0.604221345 | 0.108619903 | 1.42E-07 | EPG5      | ectopic P-granules autophagy protein 5 homolog (C. elegans) [Source:HGNC Symbol;Acc:29331]                                   |
| 3498 | ENSG00000069966 | 230.6362237 | 1.200922757  | 0.215897931 | 1.42E-07 | GNB5      | guanine nucleotide binding protein (G protein), beta 5 [Source:HGNC Symbol;Acc:4401]                                         |
| 3499 | ENSG00000077238 | 4138.421942 | -0.351379634 | 0.063196038 | 1.44E-07 | IL4R      | interleukin 4 receptor [Source:HGNC Symbol;Acc:6015]                                                                         |
| 3500 | ENSG00000186088 | 2059.435772 | -0.497171732 | 0.089449502 | 1.46E-07 | GSAP      | gamma-secretase activating protein [Source:HGNC Symbol;Acc:28042]                                                            |
| 3501 | ENSG00000111678 | 203.2452439 | 1.261101135  | 0.226954372 | 1.47E-07 | C12orf57  | chromosome 12 open reading frame 57 [Source:HGNC Symbol;Acc:29521]                                                           |
| 3502 | ENSG00000115163 | 71.94044702 | -1.968640834 | 0.354405116 | 1.49E-07 | CENPA     | centromere protein A [Source:HGNC Symbol;Acc:1851]                                                                           |
| 3503 | ENSG00000159086 | 986.4812608 | -0.615044062 | 0.110738572 | 1.49E-07 | PAXBP1    | PAX3 and PAX7 binding protein 1 [Source:HGNC Symbol;Acc:13579]                                                               |
| 3504 | ENSG00000132530 | 1462.806676 | 0.550668578  | 0.099165353 | 1.50E-07 | XAF1      | XIAP associated factor 1 [Source:HGNC Symbol;Acc:30932]                                                                      |
| 3505 | ENSG00000122643 | 1296.583594 | -0.578691131 | 0.104217084 | 1.50E-07 | NT5C3A    | 5'-nucleotidase, cytosolic IIIA [Source:HGNC Symbol;Acc:17820]                                                               |
| 3506 | ENSG00000214114 | 1137.580367 | -0.630363801 | 0.113589343 | 1.53E-07 | MYCBP     | MYC binding protein [Source:HGNC Symbol;Acc:7554]                                                                            |
| 3507 | ENSG00000137261 | 171.510087  | 1.440380201  | 0.259721107 | 1.56E-07 | KIAA0319  | KIAA0319 [Source:HGNC Symbol;Acc:21580]                                                                                      |
| 3508 | ENSG00000187862 | 70.23573616 | 2.029151395  | 0.365925845 | 1.57E-07 | TTC24     | tetratricopeptide repeat domain 24 [Source:HGNC Symbol;Acc:32348]                                                            |
| 3509 | ENSG00000204103 | 132.7871226 | 1.543729597  | 0.278457366 | 1.58E-07 | MAFB      | v-maf avian musculoaponeurotic fibrosarcoma oncogene homolog B [Source:HGNC Symbol;Acc:6408]                                 |
| 3510 | ENSG00000213923 | 873.1076712 | 0.683885336  | 0.123359132 | 1.58E-07 | CSNK1E    | casein kinase 1, epsilon [Source:HGNC Symbol;Acc:2453]                                                                       |
| 3511 | ENSG00000108848 | 6802.663294 | 0.338217938  | 0.061027331 | 1.59E-07 | LUC7L3    | LUC7-like 3 (S. cerevisiae) [Source:HGNC Symbol;Acc:24309]                                                                   |
| 3512 | ENSG00000040633 | 996.658486  | 0.61198611   | 0.110446207 | 1.60E-07 | PHF23     | PHD finger protein 23 [Source:HGNC Symbol;Acc:28428]                                                                         |
| 3513 | ENSG00000117480 | 276.0076399 | -1.230498368 | 0.222119715 | 1.61E-07 | FAAH      | fatty acid amide hydrolase [Source:HGNC Symbol;Acc:3553]                                                                     |
| 3514 | ENSG00000263141 | 985.86677   | -0.613444832 | 0.110811402 | 1.65E-07 | PAXBP1    | PAX3 and PAX7 binding protein 1 [Source:HGNC Symbol;Acc:13579]                                                               |
| 3515 | ENSG00000158373 | 260.0198579 | -1.184993243 | 0.214094885 | 1.66E-07 | HIST1H2BD | histone cluster 1, H2bd [Source:HGNC Symbol;Acc:4747]                                                                        |
| 3516 | ENSG00000137309 | 1127.016065 | -0.544378306 | 0.098409524 | 1.69E-07 | HMGA1     | high mobility group AT-hook 1 [Source:HGNC Symbol;Acc:5010]                                                                  |
| 3517 | ENSG00000072042 | 650.9343403 | 0.707286432  | 0.12787456  | 1.69E-07 | RDH11     | retinol dehydrogenase 11 (all-trans/9-cis/11-cis) [Source:HGNC Symbol;Acc:17964]                                             |
| 3518 | ENSG00000180573 | 3335.943542 | 0.36092122   | 0.065273562 | 1.71E-07 | HIST1H2AC | histone cluster 1, H2ac [Source:HGNC Symbol;Acc:4733]                                                                        |
| 3519 | ENSG00000119048 | 2971.528929 | 0.386584573  | 0.069925567 | 1.72E-07 | UBE2B     | ubiquitin-conjugating enzyme E2B [Source:HGNC Symbol;Acc:12473]                                                              |
| 3520 | ENSG00000151327 | 1060.38535  | -0.648220865 | 0.117294396 | 1.74E-07 | FAM177A1  | family with sequence similarity 177, member A1 [Source:HGNC Symbol;Acc:19829]                                                |
| 3521 | ENSG00000115339 | 614.9331071 | -0.791211371 | 0.143173364 | 1.74E-07 | GALNT3    | UDP-N-acetyl-alpha-D-galactosamine:polypeptide N-acetylgalactosaminyltransferase 3 (GalNAc-T3) [Source:HGNC Symbol;Acc:4125] |
| 3522 | ENSG00000175130 | 1637.24671  | -0.488471086 | 0.088426323 | 1.76E-07 | MARCKSL1  | MARCKS-like 1 [Source:HGNC Symbol;Acc:7142]                                                                                  |

|      |                 |             |              |             |          |              |                                                                                      |
|------|-----------------|-------------|--------------|-------------|----------|--------------|--------------------------------------------------------------------------------------|
| 3523 | ENSG00000143742 | 3403.241027 | -0.374043641 | 0.067713586 | 1.76E-07 | SRP9         | signal recognition particle 9kDa [Source:HGNC Symbol;Acc:11304]                      |
| 3524 | ENSG00000136045 | 522.4240899 | 0.782218205  | 0.141618243 | 1.77E-07 | PWP1         | PWP1 homolog (S. cerevisiae) [Source:HGNC Symbol;Acc:17015]                          |
| 3525 | ENSG00000138166 | 123.0070932 | 1.519614128  | 0.275336257 | 1.81E-07 | DUSP5        | dual specificity phosphatase 5 [Source:HGNC Symbol;Acc:3071]                         |
| 3526 | ENSG00000167702 | 429.4926193 | 0.873682871  | 0.158319126 | 1.81E-07 | KIFC2        | kinesin family member C2 [Source:HGNC Symbol;Acc:29530]                              |
| 3527 | ENSG00000022840 | 4550.454435 | -0.431174931 | 0.078151198 | 1.83E-07 | RNF10        | ring finger protein 10 [Source:HGNC Symbol;Acc:10055]                                |
| 3528 | ENSG00000113296 | 258.9089106 | -1.098087213 | 0.199042519 | 1.83E-07 | THBS4        | thrombospondin 4 [Source:HGNC Symbol;Acc:11788]                                      |
| 3529 | ENSG00000129003 | 3197.189705 | 0.44836469   | 0.081291379 | 1.84E-07 | VPS13C       | vacuolar protein sorting 13 homolog C (S. cerevisiae) [Source:HGNC Symbol;Acc:23594] |
| 3530 | ENSG00000074755 | 3214.114721 | -0.388651036 | 0.070472714 | 1.85E-07 | ZZEF1        | zinc finger, ZZ-type with EF-hand domain 1 [Source:HGNC Symbol;Acc:29027]            |
| 3531 | ENSG00000198818 | 1521.264291 | -0.551805368 | 0.100064474 | 1.85E-07 | SFT2D1       | SFT2 domain containing 1 [Source:HGNC Symbol;Acc:21102]                              |
| 3532 | ENSG00000101439 | 1614.999625 | 0.561504784  | 0.101845097 | 1.87E-07 | CST3         | cystatin C [Source:HGNC Symbol;Acc:2475]                                             |
| 3533 | ENSG00000143933 | 7873.824545 | 0.312795501  | 0.056737098 | 1.87E-07 | CALM2        | calmodulin 2 (phosphorylase kinase, delta) [Source:HGNC Symbol;Acc:1445]             |
| 3534 | ENSG00000181418 | 31.91186522 | -2.598106878 | 0.471494065 | 1.90E-07 | DDN          | dendrin [Source:HGNC Symbol;Acc:24458]                                               |
| 3535 | ENSG00000126070 | 1569.950267 | -0.527848745 | 0.095795616 | 1.90E-07 | AGO3         | argonaute RISC catalytic component 3 [Source:HGNC Symbol;Acc:18421]                  |
| 3536 | ENSG00000151726 | 11010.62193 | -0.30374654  | 0.055134081 | 1.91E-07 | ACSL1        | acyl-CoA synthetase long-chain family member 1 [Source:HGNC Symbol;Acc:3569]         |
| 3537 | ENSG00000104341 | 185.7110216 | -1.259541595 | 0.228642977 | 1.91E-07 | LAPTM4B      | lysosomal protein transmembrane 4 beta [Source:HGNC Symbol;Acc:13646]                |
| 3538 | ENSG00000143569 | 2884.866097 | -0.435732226 | 0.079111967 | 1.92E-07 | UBAP2L       | ubiquitin associated protein 2-like [Source:HGNC Symbol;Acc:29877]                   |
| 3539 | ENSG00000232528 | 128.343699  | -1.50902537  | 0.274050664 | 1.94E-07 | RP4-673D20.3 |                                                                                      |
| 3540 | ENSG00000205189 | 186.2604411 | 1.344495507  | 0.244236536 | 1.95E-07 | ZBTB10       | zinc finger and BTB domain containing 10 [Source:HGNC Symbol;Acc:30953]              |
| 3541 | ENSG00000174780 | 1217.87814  | 0.680619135  | 0.123715716 | 1.99E-07 | SRP72        | signal recognition particle 72kDa [Source:HGNC Symbol;Acc:11303]                     |
| 3542 | ENSG00000075420 | 2035.122988 | -0.494507392 | 0.089892657 | 1.99E-07 | FNDC3B       | fibronectin type III domain containing 3B [Source:HGNC Symbol;Acc:24670]             |
| 3543 | ENSG00000225079 | 41.60553313 | 2.558775934  | 0.465268474 | 2.01E-07 | FTH1P22      | ferritin, heavy polypeptide 1 pseudogene 22 [Source:HGNC Symbol;Acc:37640]           |
| 3544 | ENSG00000178802 | 365.0795339 | 0.957223239  | 0.174056496 | 2.01E-07 | MPI          | mannose phosphate isomerase [Source:HGNC Symbol;Acc:7216]                            |
| 3545 | ENSG00000086717 | 63.11239329 | -1.977917599 | 0.359676757 | 2.01E-07 | PPEF1        | protein phosphatase, EF-hand calcium binding domain 1 [Source:HGNC Symbol;Acc:9243]  |
| 3546 | ENSG00000179295 | 1573.663656 | -0.506305365 | 0.092104483 | 2.04E-07 | PTPN11       | protein tyrosine phosphatase, non-receptor type 11 [Source:HGNC Symbol;Acc:9644]     |
| 3547 | ENSG00000156313 | 636.0085123 | 0.761422172  | 0.138520363 | 2.04E-07 | RPGR         | retinitis pigmentosa GTPase regulator [Source:HGNC Symbol;Acc:10295]                 |
| 3548 | ENSG00000071246 | 362.0264708 | 0.990146648  | 0.180138276 | 2.04E-07 | VASH1        | vasohibin 1 [Source:HGNC Symbol;Acc:19964]                                           |
| 3549 | ENSG00000196199 | 2773.638466 | 0.400593823  | 0.072912143 | 2.07E-07 | MPHOSPH8     | M-phase phosphoprotein 8 [Source:HGNC Symbol;Acc:29810]                              |
| 3550 | ENSG00000146066 | 624.1832431 | 0.712651959  | 0.129714352 | 2.07E-07 | HIGD2A       | HIG1 hypoxia inducible domain family, member 2A [Source:HGNC Symbol;Acc:28311]       |

|      |                 |             |              |             |          |          |                                                                                                                                     |
|------|-----------------|-------------|--------------|-------------|----------|----------|-------------------------------------------------------------------------------------------------------------------------------------|
| 3551 | ENSG00000168763 | 578.2075938 | 0.828530721  | 0.150824195 | 2.08E-07 | CNNM3    | cyclin M3 [Source:HGNC Symbol;Acc:104]                                                                                              |
| 3552 | ENSG00000113231 | 76.9560162  | 1.883431767  | 0.342915189 | 2.09E-07 | PDE8B    | phosphodiesterase 8B [Source:HGNC Symbol;Acc:8794]                                                                                  |
| 3553 | ENSG00000122557 | 1694.925409 | 0.498293962  | 0.090746871 | 2.10E-07 | HERPUD2  | HERPUD family member 2 [Source:HGNC Symbol;Acc:21915]                                                                               |
| 3554 | ENSG00000167984 | 1741.733534 | 0.478338327  | 0.08714409  | 2.13E-07 | NLRC3    | NLR family, CARD domain containing 3 [Source:HGNC Symbol;Acc:29889]                                                                 |
| 3555 | ENSG00000162517 | 1371.857554 | -0.513709534 | 0.093628365 | 2.16E-07 | PEF1     | penta-EF-hand domain containing 1 [Source:HGNC Symbol;Acc:30009]                                                                    |
| 3556 | ENSG00000116691 | 975.878225  | -0.868432937 | 0.158289969 | 2.16E-07 | MIIIP    | migration and invasion inhibitory protein [Source:HGNC Symbol;Acc:25715]                                                            |
| 3557 | ENSG00000021645 | 121.6107885 | 3.109559005  | 0.566986931 | 2.18E-07 | NRXN3    | neurexin 3 [Source:HGNC Symbol;Acc:8010]                                                                                            |
| 3558 | ENSG00000089639 | 6194.904649 | -0.377209492 | 0.068815899 | 2.22E-07 | GMIP     | GEM interacting protein [Source:HGNC Symbol;Acc:24852]                                                                              |
| 3559 | ENSG00000125037 | 1077.274977 | 0.603406258  | 0.110102086 | 2.23E-07 | EMC3     | ER membrane protein complex subunit 3 [Source:HGNC Symbol;Acc:23999]                                                                |
| 3560 | ENSG00000106069 | 155.2990106 | 1.394866637  | 0.25455733  | 2.24E-07 | CHN2     | chimerin 2 [Source:HGNC Symbol;Acc:1944]                                                                                            |
| 3561 | ENSG00000155016 | 91.34636225 | 1.845227115  | 0.336815873 | 2.25E-07 | CYP2U1   | cytochrome P450, family 2, subfamily U, polypeptide 1 [Source:HGNC Symbol;Acc:20582]                                                |
| 3562 | ENSG00000065911 | 578.6284173 | -0.727573619 | 0.132856545 | 2.28E-07 | MTHFD2   | methylenetetrahydrofolate dehydrogenase (NADP+ dependent) 2, methylenetetrahydrofolate cyclohydrolase [Source:HGNC Symbol;Acc:7434] |
| 3563 | ENSG00000165914 | 291.0480309 | -1.008433407 | 0.184154544 | 2.28E-07 | TTC7B    | tetratricopeptide repeat domain 7B [Source:HGNC Symbol;Acc:19858]                                                                   |
| 3564 | ENSG00000214753 | 3515.411398 | 0.388372584  | 0.070946749 | 2.31E-07 | HNRNPUL2 | heterogeneous nuclear ribonucleoprotein U-like 2 [Source:HGNC Symbol;Acc:25451]                                                     |
| 3565 | ENSG00000113368 | 2051.367804 | -0.490896904 | 0.089735747 | 2.36E-07 | LMNB1    | lamin B1 [Source:HGNC Symbol;Acc:6637]                                                                                              |
| 3566 | ENSG00000131153 | 187.2478471 | -1.325042823 | 0.242218121 | 2.36E-07 | GINS2    | GINS complex subunit 2 (Psf2 homolog) [Source:HGNC Symbol;Acc:24575]                                                                |
| 3567 | ENSG00000261964 | 80.49137903 | 2.155040165  | 0.393945196 | 2.36E-07 | ADAMTS10 | ADAM metalloproteinase with thrombospondin type 1 motif, 10 [Source:HGNC Symbol;Acc:13201]                                          |
| 3568 | ENSG00000163386 | 5424.024315 | 0.351323788  | 0.064238307 | 2.37E-07 | NBPF10   | neuroblastoma breakpoint family, member 10 [Source:HGNC Symbol;Acc:31992]                                                           |
| 3569 | ENSG00000239457 | 27.41557585 | 2.876728184  | 0.526128881 | 2.39E-07 | HLA-DOB  | major histocompatibility complex, class II, DO beta [Source:HGNC Symbol;Acc:4937]                                                   |
| 3570 | ENSG00000211694 | 67.92175524 | 2.087001368  | 0.3817744   | 2.41E-07 | TRGV10   | T cell receptor gamma variable 10 (non-functional) [Source:HGNC Symbol;Acc:12285]                                                   |
| 3571 | ENSG00000165480 | 94.14466723 | -1.840530301 | 0.336786329 | 2.43E-07 | SKA3     | spindle and kinetochore associated complex subunit 3 [Source:HGNC Symbol;Acc:20262]                                                 |
| 3572 | ENSG00000145088 | 319.46953   | -0.957670629 | 0.175253603 | 2.43E-07 | EAF2     | ELL associated factor 2 [Source:HGNC Symbol;Acc:23115]                                                                              |
| 3573 | ENSG00000147457 | 1347.884314 | 0.529658049  | 0.096950159 | 2.45E-07 | CHMP7    | charged multivesicular body protein 7 [Source:HGNC Symbol;Acc:28439]                                                                |
| 3574 | ENSG00000178761 | 2108.131672 | -0.494419851 | 0.090521962 | 2.47E-07 | FAM219B  | family with sequence similarity 219, member B [Source:HGNC Symbol;Acc:24695]                                                        |
| 3575 | ENSG00000186074 | 2123.105512 | -0.432151181 | 0.079130552 | 2.48E-07 | CD300LF  | CD300 molecule-like family member f [Source:HGNC Symbol;Acc:29883]                                                                  |
| 3576 | ENSG00000136108 | 453.376315  | -0.84551899  | 0.154848976 | 2.49E-07 | CKAP2    | cytoskeleton associated protein 2 [Source:HGNC Symbol;Acc:1990]                                                                     |
| 3577 | ENSG00000123159 | 131.8112518 | 1.533496284  | 0.280950281 | 2.52E-07 | GIPC1    | GIPC PDZ domain containing family, member 1 [Source:HGNC Symbol;Acc:1226]                                                           |
| 3578 | ENSG00000198000 | 1000.814013 | 0.586912492  | 0.107554547 | 2.53E-07 | NOL8     | nucleolar protein 8 [Source:HGNC Symbol;Acc:23387]                                                                                  |

|      |                 |             |              |             |          |               |                                                                                                                |
|------|-----------------|-------------|--------------|-------------|----------|---------------|----------------------------------------------------------------------------------------------------------------|
| 3579 | ENSG00000058091 | 303.5401625 | -1.193878078 | 0.218812344 | 2.54E-07 | CDK14         | cyclin-dependent kinase 14 [Source:HGNC Symbol;Acc:8883]                                                       |
| 3580 | ENSG00000187118 | 375.1105938 | 0.897617724  | 0.164636307 | 2.60E-07 | CMC1          | C-x(9)-C motif containing 1 [Source:HGNC Symbol;Acc:28783]                                                     |
| 3581 | ENSG00000113163 | 2414.553236 | -0.462052686 | 0.084753236 | 2.61E-07 | COL4A3BP      | collagen, type IV, alpha 3 (Goodpasture antigen) binding protein [Source:HGNC Symbol;Acc:2205]                 |
| 3582 | ENSG00000204946 | 344.7322995 | 1.104441829  | 0.202610175 | 2.62E-07 | ZNF783        | zinc finger family member 783 [Source:HGNC Symbol;Acc:27222]                                                   |
| 3583 | ENSG00000187266 | 436.8264448 | -0.83869947  | 0.153967369 | 2.67E-07 | EPOR          | erythropoietin receptor [Source:HGNC Symbol;Acc:3416]                                                          |
| 3584 | ENSG00000168807 | 603.6794313 | -0.732197329 | 0.134427787 | 2.68E-07 | SNTB2         | syntrophin, beta 2 (dystrophin-associated protein A1, 59kDa, basic component 2) [Source:HGNC Symbol;Acc:11169] |
| 3585 | ENSG00000127585 | 85.85467629 | 1.859352001  | 0.341417982 | 2.69E-07 | FBXL16        | F-box and leucine-rich repeat protein 16 [Source:HGNC Symbol;Acc:14150]                                        |
| 3586 | ENSG00000198339 | 37.46292975 | -2.416625729 | 0.443971271 | 2.73E-07 | HIST1H4I      | histone cluster 1, H4i [Source:HGNC Symbol;Acc:4793]                                                           |
| 3587 | ENSG00000177169 | 3234.182721 | -0.607968707 | 0.111720798 | 2.75E-07 | ULK1          | unc-51 like autophagy activating kinase 1 [Source:HGNC Symbol;Acc:12558]                                       |
| 3588 | ENSG00000206452 | 1723.064258 | 0.666965957  | 0.122599656 | 2.78E-07 | HLA-C         | major histocompatibility complex, class I, C [Source:HGNC Symbol;Acc:4933]                                     |
| 3589 | ENSG00000106785 | 2027.760512 | -0.455959752 | 0.083838196 | 2.80E-07 | TRIM14        | tripartite motif containing 14 [Source:HGNC Symbol;Acc:16283]                                                  |
| 3590 | ENSG00000033100 | 1468.363667 | 0.58757081   | 0.108038889 | 2.80E-07 | CHPF2         | chondroitin polymerizing factor 2 [Source:HGNC Symbol;Acc:29270]                                               |
| 3591 | ENSG00000138036 | 128.3198121 | -1.474218581 | 0.271098851 | 2.81E-07 | DYNC2LI1      | dynein, cytoplasmic 2, light intermediate chain 1 [Source:HGNC Symbol;Acc:24595]                               |
| 3592 | ENSG00000121989 | 103.1901786 | 1.756697393  | 0.323102598 | 2.82E-07 | ACVR2A        | activin A receptor, type IIA [Source:HGNC Symbol;Acc:173]                                                      |
| 3593 | ENSG00000271361 | 241.6356361 | -1.145363761 | 0.210753859 | 2.86E-07 | HTATSF1P2     | HIV-1 Tat specific factor 1 pseudogene 2 [Source:HGNC Symbol;Acc:38586]                                        |
| 3594 | ENSG00000232653 | 490.263286  | -0.857088683 | 0.157754468 | 2.88E-07 | GOLGA8N       | golgin A8 family, member N [Source:HGNC Symbol;Acc:44405]                                                      |
| 3595 | ENSG00000225996 | 193.0513092 | 1.252369051  | 0.230538106 | 2.89E-07 | AL356356.1    | Protein LOC100996516 [Source:UniProtKB/TrEMBL;Acc:Q8WYY2]                                                      |
| 3596 | ENSG00000181220 | 1868.414896 | 0.503412991  | 0.09268494  | 2.91E-07 | ZNF746        | zinc finger protein 746 [Source:HGNC Symbol;Acc:21948]                                                         |
| 3597 | ENSG00000080822 | 1468.36013  | 0.507098224  | 0.093372269 | 2.92E-07 | CLDN1         | claudin domain containing 1 [Source:HGNC Symbol;Acc:1322]                                                      |
| 3598 | ENSG00000136938 | 3624.594819 | -0.380210442 | 0.070043735 | 2.96E-07 | ANP32B        | acidic (leucine-rich) nuclear phosphoprotein 32 family, member B [Source:HGNC Symbol;Acc:16677]                |
| 3599 | ENSG00000101265 | 16465.04279 | -0.268309131 | 0.049463792 | 3.02E-07 | RASSF2        | Ras association (RalGDS/AF-6) domain family member 2 [Source:HGNC Symbol;Acc:9883]                             |
| 3600 | ENSG00000214279 | 176.8224751 | 1.421825766  | 0.26216945  | 3.04E-07 | RP11-108K14.4 |                                                                                                                |
| 3601 | ENSG00000107362 | 360.6042351 | 0.914735574  | 0.168683087 | 3.05E-07 | ABHD17B       | abhydrolase domain containing 17B [Source:HGNC Symbol;Acc:24278]                                               |
| 3602 | ENSG00000179010 | 2642.443479 | 0.388180244  | 0.071619192 | 3.10E-07 | MRFAP1        | Morf4 family associated protein 1 [Source:HGNC Symbol;Acc:24549]                                               |
| 3603 | ENSG00000145416 | 466.5889466 | 0.878197133  | 0.16205798  | 3.11E-07 | MARCH1        | membrane-associated ring finger (C3HC4) 1, E3 ubiquitin protein ligase [Source:HGNC Symbol;Acc:26077]          |
| 3604 | ENSG00000213366 | 442.5201642 | 0.835462942  | 0.154183672 | 3.12E-07 | GSTM2         | glutathione S-transferase mu 2 (muscle) [Source:HGNC Symbol;Acc:4634]                                          |
| 3605 | ENSG00000079432 | 1189.210571 | 0.751781745  | 0.138759871 | 3.13E-07 | CIC           | capicua transcriptional repressor [Source:HGNC Symbol;Acc:14214]                                               |
| 3606 | ENSG00000122547 | 881.3086313 | -0.615663025 | 0.113636053 | 3.13E-07 | EEPD1         | endonuclease/exonuclease/phosphatase family domain containing 1 [Source:HGNC Symbol;Acc:22223]                 |

|      |                 |             |              |             |          |               |                                                                                                           |
|------|-----------------|-------------|--------------|-------------|----------|---------------|-----------------------------------------------------------------------------------------------------------|
| 3607 | ENSG00000204131 | 1135.364122 | 0.583270984  | 0.107691217 | 3.16E-07 | NHSL2         | NHS-like 2 [Source:HGNC Symbol;Acc:33737]                                                                 |
| 3608 | ENSG00000269713 | 170.3220767 | 1.379636415  | 0.254728573 | 3.16E-07 | NBPF10        | Neuroblastoma breakpoint family member 10 [Source:UniProtKB/TrEMBL;Acc:11VE14]                            |
| 3609 | ENSG00000133104 | 1344.329565 | -0.668043287 | 0.12335183  | 3.16E-07 | SPG20         | spastic paraplegia 20 (Troyer syndrome) [Source:HGNC Symbol;Acc:18514]                                    |
| 3610 | ENSG00000101849 | 2241.532857 | 0.431912475  | 0.079753525 | 3.17E-07 | TBL1X         | transducin (beta)-like 1X-linked [Source:HGNC Symbol;Acc:11585]                                           |
| 3611 | ENSG00000101161 | 1488.790644 | 0.553044361  | 0.10212103  | 3.17E-07 | PRPF6         | pre-mRNA processing factor 6 [Source:HGNC Symbol;Acc:15860]                                               |
| 3612 | ENSG00000038210 | 868.500252  | -0.668195344 | 0.123393587 | 3.17E-07 | PI4K2B        | phosphatidylinositol 4-kinase type 2 beta [Source:HGNC Symbol;Acc:18215]                                  |
| 3613 | ENSG00000101003 | 183.8221191 | -1.327844946 | 0.245347901 | 3.23E-07 | GINS1         | GINS complex subunit 1 (Psf1 homolog) [Source:HGNC Symbol;Acc:28980]                                      |
| 3614 | ENSG00000229156 | 62.2338019  | -2.055412645 | 0.37980397  | 3.23E-07 | RP11-250H24.2 |                                                                                                           |
| 3615 | ENSG00000164163 | 707.7904041 | 0.666027315  | 0.123087406 | 3.24E-07 | ABCE1         | ATP-binding cassette, sub-family E (OABP), member 1 [Source:HGNC Symbol;Acc:69]                           |
| 3616 | ENSG00000237022 | 5577.60956  | 0.983104299  | 0.181709742 | 3.26E-07 | HLA-C         | major histocompatibility complex, class I, C [Source:HGNC Symbol;Acc:4933]                                |
| 3617 | ENSG00000173889 | 3178.877928 | -0.468303703 | 0.086568126 | 3.27E-07 | PHC3          | polyhomeotic homolog 3 (Drosophila) [Source:HGNC Symbol;Acc:15682]                                        |
| 3618 | ENSG00000163535 | 178.9651346 | -1.393196475 | 0.257777352 | 3.36E-07 | SGOL2         | shugoshin-like 2 (S. pombe) [Source:HGNC Symbol;Acc:30812]                                                |
| 3619 | ENSG00000170889 | 939.8583818 | 0.63187798   | 0.116984357 | 3.42E-07 | RPS9          | ribosomal protein S9 [Source:HGNC Symbol;Acc:10442]                                                       |
| 3620 | ENSG00000161202 | 2037.197684 | -0.427951348 | 0.079236931 | 3.43E-07 | DVL3          | dishevelled segment polarity protein 3 [Source:HGNC Symbol;Acc:3087]                                      |
| 3621 | ENSG00000105993 | 3058.374134 | 0.402890779  | 0.074603733 | 3.44E-07 | DNAJB6        | DnaJ (Hsp40) homolog, subfamily B, member 6 [Source:HGNC Symbol;Acc:14888]                                |
| 3622 | ENSG00000138496 | 2113.588505 | 0.461632372  | 0.085486437 | 3.44E-07 | PARP9         | poly (ADP-ribose) polymerase family, member 9 [Source:HGNC Symbol;Acc:24118]                              |
| 3623 | ENSG00000145868 | 1665.048966 | -0.471293692 | 0.087296541 | 3.47E-07 | FBXO38        | F-box protein 38 [Source:HGNC Symbol;Acc:28844]                                                           |
| 3624 | ENSG00000182208 | 503.2958683 | 0.78845818   | 0.146049492 | 3.47E-07 | MOB2          | MOB kinase activator 2 [Source:HGNC Symbol;Acc:24904]                                                     |
| 3625 | ENSG00000178773 | 46.86230867 | 2.365588565  | 0.43825471  | 3.48E-07 | CPNE7         | copine VII [Source:HGNC Symbol;Acc:2320]                                                                  |
| 3626 | ENSG00000185499 | 66.60928933 | -2.234188642 | 0.413969891 | 3.50E-07 | MUC1          | mucin 1, cell surface associated [Source:HGNC Symbol;Acc:7508]                                            |
| 3627 | ENSG00000008853 | 236.2569023 | 1.219120424  | 0.225933143 | 3.52E-07 | RHOBTB2       | Rho-related BTB domain containing 2 [Source:HGNC Symbol;Acc:18756]                                        |
| 3628 | ENSG00000131446 | 2976.547766 | 0.443103582  | 0.082125011 | 3.53E-07 | MGAT1         | mannosyl (alpha-1,3-)-glycoprotein beta-1,2-N-acetylglucosaminyltransferase [Source:HGNC Symbol;Acc:7044] |
| 3629 | ENSG00000136861 | 1261.260967 | -0.603235984 | 0.111811095 | 3.53E-07 | CDK5RAP2      | CDK5 regulatory subunit associated protein 2 [Source:HGNC Symbol;Acc:18672]                               |
| 3630 | ENSG00000134444 | 2007.745467 | -0.5119481   | 0.094891678 | 3.53E-07 | KIAA1468      | KIAA1468 [Source:HGNC Symbol;Acc:29289]                                                                   |
| 3631 | ENSG00000166501 | 9106.380289 | 0.279859421  | 0.051898957 | 3.58E-07 | PRKCB         | protein kinase C, beta [Source:HGNC Symbol;Acc:9395]                                                      |
| 3632 | ENSG00000041880 | 134.9977849 | 1.429134252  | 0.265223787 | 3.66E-07 | PARP3         | poly (ADP-ribose) polymerase family, member 3 [Source:HGNC Symbol;Acc:273]                                |
| 3633 | ENSG00000169762 | 1400.019678 | -0.521411031 | 0.096778526 | 3.68E-07 | TAPT1         | transmembrane anterior posterior transformation 1 [Source:HGNC Symbol;Acc:26887]                          |
| 3634 | ENSG00000170545 | 220.1910821 | 1.194848913  | 0.221801839 | 3.69E-07 | SMAGP         | small cell adhesion glycoprotein [Source:HGNC Symbol;Acc:26918]                                           |



|      |                 |             |              |             |          |            |                                                                                               |
|------|-----------------|-------------|--------------|-------------|----------|------------|-----------------------------------------------------------------------------------------------|
| 3635 | ENSG00000197044 | 295.9597317 | 1.058736774  | 0.196610094 | 3.73E-07 | ZNF441     | zinc finger protein 441 [Source:HGNC Symbol;Acc:20875]                                        |
| 3636 | ENSG00000122068 | 1074.642718 | 0.645917569  | 0.119961821 | 3.74E-07 | FYTTD1     | forty-two-three domain containing 1 [Source:HGNC Symbol;Acc:25407]                            |
| 3637 | ENSG00000108064 | 681.5280069 | 0.796941508  | 0.148015817 | 3.74E-07 | TFAM       | transcription factor A, mitochondrial [Source:HGNC Symbol;Acc:11741]                          |
| 3638 | ENSG00000065802 | 1101.176002 | -0.637727181 | 0.118456047 | 3.75E-07 | ASB1       | ankyrin repeat and SOCS box containing 1 [Source:HGNC Symbol;Acc:16011]                       |
| 3639 | ENSG00000217128 | 1699.0054   | 0.508066406  | 0.094374305 | 3.76E-07 | FNIP1      | folliculin interacting protein 1 [Source:HGNC Symbol;Acc:29418]                               |
| 3640 | ENSG00000141401 | 1342.100331 | -0.568393901 | 0.105630499 | 3.81E-07 | IMPA2      | inositol(myo)-1(or 4)-monophosphatase 2 [Source:HGNC Symbol;Acc:6051]                         |
| 3641 | ENSG00000116001 | 3753.21822  | 0.37162591   | 0.069065053 | 3.81E-07 | TIA1       | TIA1 cytotoxic granule-associated RNA binding protein [Source:HGNC Symbol;Acc:11802]          |
| 3642 | ENSG00000158158 | 278.7123322 | 1.049163188  | 0.195009101 | 3.83E-07 | CNNM4      | cyclin M4 [Source:HGNC Symbol;Acc:105]                                                        |
| 3643 | ENSG00000261739 | 340.7230845 | -0.918050382 | 0.170645378 | 3.83E-07 | GOLGA8S    | golgin A8 family, member S [Source:HGNC Symbol;Acc:44409]                                     |
| 3644 | ENSG00000155893 | 430.5786623 | -0.856183544 | 0.159146985 | 3.83E-07 | ACPL2      | acid phosphatase-like 2 [Source:HGNC Symbol;Acc:26303]                                        |
| 3645 | ENSG00000150477 | 786.8278436 | -0.668474805 | 0.124259131 | 3.83E-07 | KIAA1328   | KIAA1328 [Source:HGNC Symbol;Acc:29248]                                                       |
| 3646 | ENSG00000169246 | 7281.476102 | -0.376427829 | 0.06997642  | 3.84E-07 | NPIPB3     | nuclear pore complex interacting protein family, member B3 [Source:HGNC Symbol;Acc:28989]     |
| 3647 | ENSG00000262128 | 3216.676623 | 0.360670443  | 0.067048211 | 3.84E-07 | LAT2       | linker for activation of T cells family, member 2 [Source:HGNC Symbol;Acc:12749]              |
| 3648 | ENSG00000162104 | 248.4045406 | 1.201695364  | 0.223395942 | 3.84E-07 | ADCY9      | adenylate cyclase 9 [Source:HGNC Symbol;Acc:240]                                              |
| 3649 | ENSG00000119888 | 28.33607149 | -2.769072155 | 0.514912575 | 3.87E-07 | EPCAM      | epithelial cell adhesion molecule [Source:HGNC Symbol;Acc:11529]                              |
| 3650 | ENSG00000146830 | 2819.818587 | 0.507031155  | 0.09428507  | 3.87E-07 | GIGYF1     | GRB10 interacting GYF protein 1 [Source:HGNC Symbol;Acc:9126]                                 |
| 3651 | ENSG00000091436 | 319.1965238 | -0.931270938 | 0.173176539 | 3.87E-07 | MLTK       | Mitogen-activated protein kinase kinase kinase MLT [Source:UniProtKB/Swiss-Prot;Acc:Q9NYL2]   |
| 3652 | ENSG00000138439 | 314.5474418 | 0.995563704  | 0.185149489 | 3.88E-07 | FAM117B    | family with sequence similarity 117, member B [Source:HGNC Symbol;Acc:14440]                  |
| 3653 | ENSG00000145012 | 2245.656126 | -0.525427034 | 0.097718156 | 3.88E-07 | LPP        | LIM domain containing preferred translocation partner in lipoma [Source:HGNC Symbol;Acc:6679] |
| 3654 | ENSG00000161929 | 399.0859681 | 0.940154537  | 0.174848841 | 3.88E-07 | SCIMP      | SLP adaptor and CSK interacting membrane protein [Source:HGNC Symbol;Acc:33504]               |
| 3655 | ENSG00000161940 | 27.14603962 | 2.771557434  | 0.515622876 | 3.92E-07 | BCL6B      | B-cell CLL/lymphoma 6, member B [Source:HGNC Symbol;Acc:1002]                                 |
| 3656 | ENSG00000262063 | 316.3417685 | 1.030716061  | 0.191758798 | 3.92E-07 | LIMK1      | LIM domain kinase 1 [Source:HGNC Symbol;Acc:6613]                                             |
| 3657 | ENSG00000117020 | 306.1946659 | 1.141336433  | 0.212356239 | 3.93E-07 | AKT3       | v-akt murine thymoma viral oncogene homolog 3 [Source:HGNC Symbol;Acc:393]                    |
| 3658 | ENSG00000178295 | 644.3141208 | -0.846147104 | 0.157497819 | 3.97E-07 | GEN1       | GEN1 Holliday junction 5' flap endonuclease [Source:HGNC Symbol;Acc:26881]                    |
| 3659 | ENSG00000109436 | 146.0635848 | 1.499320911  | 0.279244047 | 4.04E-07 | TBC1D9     | TBC1 domain family, member 9 (with GRAM domain) [Source:HGNC Symbol;Acc:21710]                |
| 3660 | ENSG00000122497 | 989.4222764 | 0.71773029   | 0.133694968 | 4.06E-07 | NBPF14     | neuroblastoma breakpoint family, member 14 [Source:HGNC Symbol;Acc:25232]                     |
| 3661 | ENSG00000234603 | 185.4890821 | -1.291102373 | 0.240621663 | 4.12E-07 | AL356740.1 |                                                                                               |
| 3662 | ENSG00000106683 | 316.5343581 | 1.026353124  | 0.191289502 | 4.13E-07 | LIMK1      | LIM domain kinase 1 [Source:HGNC Symbol;Acc:6613]                                             |

|      |                 |             |              |             |          |              |                                                                                                       |
|------|-----------------|-------------|--------------|-------------|----------|--------------|-------------------------------------------------------------------------------------------------------|
| 3663 | ENSG00000006625 | 600.0093427 | -0.733245344 | 0.136663956 | 4.13E-07 | GGCT         | gamma-glutamylcyclotransferase [Source:HGNC Symbol;Acc:21705]                                         |
| 3664 | ENSG00000171401 | 24.47983648 | -2.812253437 | 0.524340789 | 4.17E-07 | KRT13        | keratin 13 [Source:HGNC Symbol;Acc:6415]                                                              |
| 3665 | ENSG00000086730 | 3216.811923 | 0.359740592  | 0.067077295 | 4.18E-07 | LAT2         | linker for activation of T cells family, member 2 [Source:HGNC Symbol;Acc:12749]                      |
| 3666 | ENSG00000107562 | 11.71177844 | -3.029256495 | 0.564850214 | 4.18E-07 | CXCL12       | chemokine (C-X-C motif) ligand 12 [Source:HGNC Symbol;Acc:10672]                                      |
| 3667 | ENSG00000140471 | 860.8131353 | 0.639907873  | 0.119355707 | 4.22E-07 | LINS         | lines homolog (Drosophila) [Source:HGNC Symbol;Acc:30922]                                             |
| 3668 | ENSG00000173120 | 5545.893817 | 0.302617992  | 0.056447741 | 4.22E-07 | KDM2A        | lysine (K)-specific demethylase 2A [Source:HGNC Symbol;Acc:13606]                                     |
| 3669 | ENSG00000171302 | 1397.276384 | 0.498878188  | 0.093057043 | 4.22E-07 | CANT1        | calcium activated nucleotidase 1 [Source:HGNC Symbol;Acc:19721]                                       |
| 3670 | ENSG00000213533 | 589.3789668 | -0.772809967 | 0.144234668 | 4.29E-07 | TMEM110      | transmembrane protein 110 [Source:HGNC Symbol;Acc:30526]                                              |
| 3671 | ENSG00000054598 | 30.15076652 | -2.559044753 | 0.477765376 | 4.33E-07 | FOXO1        | forkhead box C1 [Source:HGNC Symbol;Acc:3800]                                                         |
| 3672 | ENSG00000163959 | 423.244194  | -0.82380538  | 0.153819758 | 4.34E-07 | SLC51A       | solute carrier family 51, alpha subunit [Source:HGNC Symbol;Acc:29955]                                |
| 3673 | ENSG00000168785 | 210.8294847 | 1.233122348  | 0.230268811 | 4.36E-07 | TSPAN5       | tetraspanin 5 [Source:HGNC Symbol;Acc:17753]                                                          |
| 3674 | ENSG00000221914 | 1886.783977 | -0.473193802 | 0.088441135 | 4.47E-07 | PPP2R2A      | protein phosphatase 2, regulatory subunit B, alpha [Source:HGNC Symbol;Acc:9304]                      |
| 3675 | ENSG00000213178 | 558.2851044 | 0.822243561  | 0.153805721 | 4.58E-07 | RP11-641D5.1 |                                                                                                       |
| 3676 | ENSG00000239704 | 330.7644666 | -0.983999594 | 0.184078463 | 4.59E-07 | CDRT4        | CMT1A duplicated region transcript 4 [Source:HGNC Symbol;Acc:14383]                                   |
| 3677 | ENSG00000198876 | 1482.157088 | -0.475851562 | 0.089026672 | 4.60E-07 | DCAF12       | DDB1 and CUL4 associated factor 12 [Source:HGNC Symbol;Acc:19911]                                     |
| 3678 | ENSG00000122435 | 545.7480242 | 0.780105851  | 0.145971834 | 4.62E-07 | TRMT13       | tRNA methyltransferase 13 homolog (S. cerevisiae) [Source:HGNC Symbol;Acc:25502]                      |
| 3679 | ENSG00000129244 | 43.05677246 | -2.390378659 | 0.447478553 | 4.68E-07 | ATP1B2       | ATPase, Na <sup>+</sup> /K <sup>+</sup> transporting, beta 2 polypeptide [Source:HGNC Symbol;Acc:805] |
| 3680 | ENSG00000138621 | 426.2237299 | 0.892582169  | 0.167098761 | 4.68E-07 | PPCDC        | phosphopantothenoilcysteine decarboxylase [Source:HGNC Symbol;Acc:28107]                              |
| 3681 | ENSG00000198467 | 234.7039003 | 1.123228915  | 0.210308723 | 4.70E-07 | TPM2         | tropomyosin 2 (beta) [Source:HGNC Symbol;Acc:12011]                                                   |
| 3682 | ENSG00000128596 | 71.54822418 | 1.949283725  | 0.365291452 | 4.82E-07 | CCDC136      | coiled-coil domain containing 136 [Source:HGNC Symbol;Acc:22225]                                      |
| 3683 | ENSG00000116584 | 4906.663768 | -0.319366261 | 0.059865746 | 4.86E-07 | ARHGEF2      | Rho/Rac guanine nucleotide exchange factor (GEF) 2 [Source:HGNC Symbol;Acc:682]                       |
| 3684 | ENSG00000109323 | 2741.083262 | -0.385949682 | 0.07238427  | 4.94E-07 | MANBA        | mannosidase, beta A, lysosomal [Source:HGNC Symbol;Acc:6831]                                          |
| 3685 | ENSG00000108375 | 426.6169065 | 0.886698023  | 0.16634066  | 4.97E-07 | RNF43        | ring finger protein 43 [Source:HGNC Symbol;Acc:18505]                                                 |
| 3686 | ENSG00000162650 | 135.9395448 | 1.475389404  | 0.276818668 | 4.99E-07 | ATXN7L2      | ataxin 7-like 2 [Source:HGNC Symbol;Acc:28713]                                                        |
| 3687 | ENSG00000119314 | 7367.417201 | -0.315167866 | 0.059136577 | 5.00E-07 | PTBP3        | polypyrimidine tract binding protein 3 [Source:HGNC Symbol;Acc:10253]                                 |
| 3688 | ENSG00000184909 | 47.13407547 | -2.327400076 | 0.43675633  | 5.02E-07 | C1ORF220     |                                                                                                       |
| 3689 | ENSG00000125124 | 668.3285544 | 0.993193734  | 0.186384297 | 5.02E-07 | BBS2         | Bardet-Biedl syndrome 2 [Source:HGNC Symbol;Acc:967]                                                  |
| 3690 | ENSG00000203805 | 11.91673409 | -3.008380187 | 0.564723501 | 5.06E-07 | PPAPDC1A     | phosphatidic acid phosphatase type 2 domain containing 1A [Source:HGNC Symbol;Acc:23531]              |

|      |                 |             |              |             |          |          |                                                                                                          |
|------|-----------------|-------------|--------------|-------------|----------|----------|----------------------------------------------------------------------------------------------------------|
| 3691 | ENSG00000168078 | 34.29377588 | -2.545444229 | 0.478050901 | 5.13E-07 | PBK      | PDZ binding kinase [Source:HGNC Symbol;Acc:18282]                                                        |
| 3692 | ENSG00000184313 | 143.4930694 | -1.418133933 | 0.266348449 | 5.14E-07 | MROH7    | maestro heat-like repeat family member 7 [Source:HGNC Symbol;Acc:24802]                                  |
| 3693 | ENSG00000142166 | 1974.473612 | 0.488294961  | 0.091730221 | 5.17E-07 | IFNAR1   | interferon (alpha, beta and omega) receptor 1 [Source:HGNC Symbol;Acc:5432]                              |
| 3694 | ENSG00000148362 | 515.03307   | 0.870625873  | 0.163568158 | 5.18E-07 | C9orf142 | chromosome 9 open reading frame 142 [Source:HGNC Symbol;Acc:27849]                                       |
| 3695 | ENSG00000166965 | 277.2546742 | -0.977941047 | 0.183763244 | 5.21E-07 | RCCD1    | RCC1 domain containing 1 [Source:HGNC Symbol;Acc:30457]                                                  |
| 3696 | ENSG00000146109 | 220.8614901 | 1.16622469   | 0.219185202 | 5.23E-07 | ABT1     | activator of basal transcription 1 [Source:HGNC Symbol;Acc:17369]                                        |
| 3697 | ENSG00000117625 | 1915.051047 | -0.49343808  | 0.092749301 | 5.25E-07 | RCOR3    | REST corepressor 3 [Source:HGNC Symbol;Acc:25594]                                                        |
| 3698 | ENSG00000117174 | 375.1103406 | 0.884642261  | 0.166340427 | 5.30E-07 | ZNHIT6   | zinc finger, HIT-type containing 6 [Source:HGNC Symbol;Acc:26089]                                        |
| 3699 | ENSG00000268612 | 221.0991497 | 1.162329948  | 0.218598739 | 5.33E-07 | ABT1     | activator of basal transcription 1 [Source:HGNC Symbol;Acc:17369]                                        |
| 3700 | ENSG00000102977 | 320.3459795 | 0.97680269   | 0.183724304 | 5.35E-07 | ACD      | adrenocortical dysplasia homolog (mouse) [Source:HGNC Symbol;Acc:25070]                                  |
| 3701 | ENSG00000115806 | 808.8025317 | 0.632414665  | 0.118973486 | 5.38E-07 | GORASP2  | golgi reassembly stacking protein 2, 55kDa [Source:HGNC Symbol;Acc:17500]                                |
| 3702 | ENSG00000140987 | 466.9947247 | 0.811606496  | 0.152778727 | 5.47E-07 | ZSCAN32  | zinc finger and SCAN domain containing 32 [Source:HGNC Symbol;Acc:20812]                                 |
| 3703 | ENSG00000181555 | 3417.236512 | -0.367685088 | 0.069225384 | 5.50E-07 | SETD2    | SET domain containing 2 [Source:HGNC Symbol;Acc:18420]                                                   |
| 3704 | ENSG00000103978 | 1276.347036 | -0.541973506 | 0.102130116 | 5.64E-07 | TMEM87A  | transmembrane protein 87A [Source:HGNC Symbol;Acc:24522]                                                 |
| 3705 | ENSG00000183765 | 218.0092635 | -1.129865015 | 0.212986687 | 5.70E-07 | CHEK2    | checkpoint kinase 2 [Source:HGNC Symbol;Acc:16627]                                                       |
| 3706 | ENSG00000144554 | 1224.206169 | -0.509554223 | 0.096083248 | 5.74E-07 | FANCD2   | Fanconi anemia, complementation group D2 [Source:HGNC Symbol;Acc:3585]                                   |
| 3707 | ENSG00000234518 | 110.7733115 | 1.573304348  | 0.296694453 | 5.76E-07 | PTGES3P1 | prostaglandin E synthase 3 (cytosolic) pseudogene 1 [Source:HGNC Symbol;Acc:43824]                       |
| 3708 | ENSG00000147488 | 133.9125382 | 2.966069422  | 0.55937897  | 5.77E-07 | ST18     | suppression of tumorigenicity 18 (breast carcinoma) (zinc finger protein) [Source:HGNC Symbol;Acc:18695] |
| 3709 | ENSG00000070476 | 1650.468746 | -0.456427505 | 0.086084078 | 5.78E-07 | ZXDC     | ZXD family zinc finger C [Source:HGNC Symbol;Acc:28160]                                                  |
| 3710 | ENSG00000116138 | 464.2636281 | 0.815238098  | 0.153759535 | 5.78E-07 | DNAJC16  | DnaJ (Hsp40) homolog, subfamily C, member 16 [Source:HGNC Symbol;Acc:29157]                              |
| 3711 | ENSG00000072121 | 1257.687416 | -0.566700103 | 0.106905149 | 5.81E-07 | ZFYVE26  | zinc finger, FYVE domain containing 26 [Source:HGNC Symbol;Acc:20761]                                    |
| 3712 | ENSG00000080371 | 1615.588302 | -0.468620802 | 0.088406541 | 5.81E-07 | RAB21    | RAB21, member RAS oncogene family [Source:HGNC Symbol;Acc:18263]                                         |
| 3713 | ENSG00000160679 | 2459.52376  | 0.433308958  | 0.081748408 | 5.82E-07 | CHTOP    | chromatin target of PRMT1 [Source:HGNC Symbol;Acc:24511]                                                 |
| 3714 | ENSG00000151422 | 349.0071352 | -0.878018434 | 0.165705259 | 5.88E-07 | FER      | fer (fps/fes related) tyrosine kinase [Source:HGNC Symbol;Acc:3655]                                      |
| 3715 | ENSG00000211821 | 35.25083222 | 2.485754634  | 0.469146099 | 5.88E-07 | TRDV2    | T cell receptor delta variable 2 [Source:HGNC Symbol;Acc:12263]                                          |
| 3716 | ENSG00000176973 | 611.3007754 | 0.844732362  | 0.159487406 | 5.94E-07 | FAM89B   | family with sequence similarity 89, member B [Source:HGNC Symbol;Acc:16708]                              |
| 3717 | ENSG00000196950 | 337.508325  | 1.054986779  | 0.199188649 | 5.95E-07 | SLC39A10 | solute carrier family 39 (zinc transporter), member 10 [Source:HGNC Symbol;Acc:20861]                    |
| 3718 | ENSG00000211695 | 62.59322341 | 2.020827921  | 0.381552597 | 5.95E-07 | TRGV9    | T cell receptor gamma variable 9 [Source:HGNC Symbol;Acc:12295]                                          |

|      |                 |             |              |             |          |            |                                                                                                                             |
|------|-----------------|-------------|--------------|-------------|----------|------------|-----------------------------------------------------------------------------------------------------------------------------|
| 3719 | ENSG00000131899 | 251.0208355 | 1.108702624  | 0.209363046 | 5.97E-07 | LLGL1      | lethal giant larvae homolog 1 (Drosophila) [Source:HGNC Symbol;Acc:6628]                                                    |
| 3720 | ENSG00000011105 | 34.72243847 | 2.532246575  | 0.478210054 | 5.98E-07 | TSPAN9     | tetraspanin 9 [Source:HGNC Symbol;Acc:21640]                                                                                |
| 3721 | ENSG00000261721 | 1143.075172 | -0.684129293 | 0.129204008 | 5.99E-07 | GRINA      | glutamate receptor, ionotropic, N-methyl D-aspartate-associated protein 1 (glutamate binding) [Source:HGNC Symbol;Acc:4589] |
| 3722 | ENSG00000138468 | 2072.773929 | 0.464756283  | 0.087796371 | 6.03E-07 | SENPF7     | SUMO1/sentrin specific peptidase 7 [Source:HGNC Symbol;Acc:30402]                                                           |
| 3723 | ENSG00000162976 | 393.796683  | 0.92342827   | 0.174450333 | 6.04E-07 | PQLC3      | PQ loop repeat containing 3 [Source:HGNC Symbol;Acc:28503]                                                                  |
| 3724 | ENSG00000148341 | 1395.777575 | -0.550372958 | 0.103977661 | 6.04E-07 | SH3GLB2    | SH3-domain GRB2-like endophilin B2 [Source:HGNC Symbol;Acc:10834]                                                           |
| 3725 | ENSG00000038427 | 4336.190271 | 0.348832499  | 0.065921887 | 6.09E-07 | VCAN       | versican [Source:HGNC Symbol;Acc:2464]                                                                                      |
| 3726 | ENSG00000197170 | 892.3991379 | -0.597350501 | 0.112909747 | 6.13E-07 | PSMD12     | proteasome (prosome, macropain) 26S subunit, non-ATPase, 12 [Source:HGNC Symbol;Acc:9557]                                   |
| 3727 | ENSG00000204356 | 345.6809389 | 0.936975333  | 0.17716035  | 6.18E-07 | NELFE      | negative elongation factor complex member E [Source:HGNC Symbol;Acc:13974]                                                  |
| 3728 | ENSG00000268218 | 250.5267373 | -1.103078375 | 0.208606608 | 6.21E-07 | AC137932.1 |                                                                                                                             |
| 3729 | ENSG00000123411 | 247.4867575 | -1.177732906 | 0.222783901 | 6.26E-07 | IKZF4      | IKAROS family zinc finger 4 (Eos) [Source:HGNC Symbol;Acc:13179]                                                            |
| 3730 | ENSG00000146535 | 337.1343091 | 0.916663735  | 0.173420092 | 6.28E-07 | GNA12      | guanine nucleotide binding protein (G protein) alpha 12 [Source:HGNC Symbol;Acc:4380]                                       |
| 3731 | ENSG00000152253 | 112.0382351 | -1.586704582 | 0.300271696 | 6.33E-07 | SPC25      | SPC25, NDC80 kinetochore complex component [Source:HGNC Symbol;Acc:24031]                                                   |
| 3732 | ENSG00000131187 | 100.0319877 | -1.566360622 | 0.296504332 | 6.38E-07 | F12        | coagulation factor XII (Hageman factor) [Source:HGNC Symbol;Acc:3530]                                                       |
| 3733 | ENSG00000120156 | 75.29884632 | 2.016737144  | 0.381761387 | 6.38E-07 | TEK        | TEK tyrosine kinase, endothelial [Source:HGNC Symbol;Acc:11724]                                                             |
| 3734 | ENSG00000165527 | 1543.83045  | 0.46001295   | 0.087079188 | 6.38E-07 | ARF6       | ADP-ribosylation factor 6 [Source:HGNC Symbol;Acc:659]                                                                      |
| 3735 | ENSG00000112029 | 256.2172449 | -1.065579196 | 0.201766687 | 6.43E-07 | FBXO5      | F-box protein 5 [Source:HGNC Symbol;Acc:13584]                                                                              |
| 3736 | ENSG00000125245 | 111.9341764 | 1.649816453  | 0.312393684 | 6.43E-07 | GPR18      | G protein-coupled receptor 18 [Source:HGNC Symbol;Acc:4472]                                                                 |
| 3737 | ENSG00000146674 | 62.45004802 | 2.18004991   | 0.412878584 | 6.46E-07 | IGFBP3     | insulin-like growth factor binding protein 3 [Source:HGNC Symbol;Acc:5472]                                                  |
| 3738 | ENSG00000138642 | 277.9681573 | 1.02408781   | 0.193963177 | 6.47E-07 | HERC6      | HECT and RLD domain containing E3 ubiquitin protein ligase family member 6 [Source:HGNC Symbol;Acc:26072]                   |
| 3739 | ENSG00000089154 | 1549.284866 | 0.623506325  | 0.118120012 | 6.52E-07 | GCN1L1     | GCN1 general control of amino-acid synthesis 1-like 1 (yeast) [Source:HGNC Symbol;Acc:4199]                                 |
| 3740 | ENSG00000083099 | 498.9732409 | 0.78595268   | 0.14890702  | 6.53E-07 | LYRM2      | LYR motif containing 2 [Source:HGNC Symbol;Acc:25229]                                                                       |
| 3741 | ENSG00000196923 | 2956.265138 | -0.547648818 | 0.103758053 | 6.53E-07 | PDLIM7     | PDZ and LIM domain 7 (enigma) [Source:HGNC Symbol;Acc:22958]                                                                |
| 3742 | ENSG00000167664 | 50.18598418 | 2.17979605   | 0.413096778 | 6.58E-07 | TMIGD2     | transmembrane and immunoglobulin domain containing 2 [Source:HGNC Symbol;Acc:28324]                                         |
| 3743 | ENSG00000143106 | 1096.077765 | 0.545046682  | 0.103293721 | 6.58E-07 | PSMA5      | proteasome (prosome, macropain) subunit, alpha type, 5 [Source:HGNC Symbol;Acc:9534]                                        |
| 3744 | ENSG00000184992 | 907.0992461 | -0.593103757 | 0.112436085 | 6.63E-07 | BRI3BP     | BRI3 binding protein [Source:HGNC Symbol;Acc:14251]                                                                         |
| 3745 | ENSG00000197355 | 259.1845065 | 1.058524693  | 0.200667731 | 6.63E-07 | UAP1L1     | UDP-N-acetylglucosamine pyrophosphorylase 1-like 1 [Source:HGNC Symbol;Acc:28082]                                           |
| 3746 | ENSG00000137409 | 3200.859464 | 0.381867969  | 0.072392852 | 6.63E-07 | MTCH1      | mitochondrial carrier 1 [Source:HGNC Symbol;Acc:17586]                                                                      |

|      |                 |             |              |             |          |               |                                                                                          |
|------|-----------------|-------------|--------------|-------------|----------|---------------|------------------------------------------------------------------------------------------|
| 3747 | ENSG00000089094 | 391.2436827 | 0.842492038  | 0.15974868  | 6.67E-07 | KDM2B         | lysine (K)-specific demethylase 2B [Source:HGNC Symbol;Acc:13610]                        |
| 3748 | ENSG00000144476 | 52.63036828 | 2.166234571  | 0.41079439  | 6.69E-07 | ACKR3         | atypical chemokine receptor 3 [Source:HGNC Symbol;Acc:23692]                             |
| 3749 | ENSG00000144635 | 1672.140886 | 0.502147335  | 0.095258408 | 6.76E-07 | DYNC1L1       | dynein, cytoplasmic 1, light intermediate chain 1 [Source:HGNC Symbol;Acc:18745]         |
| 3750 | ENSG00000167291 | 46.54476167 | 2.248669834  | 0.426765271 | 6.84E-07 | TBC1D16       | TBC1 domain family, member 16 [Source:HGNC Symbol;Acc:28356]                             |
| 3751 | ENSG00000177311 | 1249.506629 | 0.597627721  | 0.113426525 | 6.85E-07 | ZBTB38        | zinc finger and BTB domain containing 38 [Source:HGNC Symbol;Acc:26636]                  |
| 3752 | ENSG00000164825 | 15.28799351 | -2.917230212 | 0.553716306 | 6.86E-07 | DEFB1         | defensin, beta 1 [Source:HGNC Symbol;Acc:2766]                                           |
| 3753 | ENSG00000161265 | 643.4735978 | 0.731767067  | 0.138929446 | 6.91E-07 | U2AF1L4       | U2 small nuclear RNA auxiliary factor 1-like 4 [Source:HGNC Symbol;Acc:23020]            |
| 3754 | ENSG00000047365 | 2319.149418 | -0.467221898 | 0.088712183 | 6.92E-07 | ARAP2         | ArfGAP with RhoGAP domain, ankyrin repeat and PH domain 2 [Source:HGNC Symbol;Acc:16924] |
| 3755 | ENSG00000092964 | 593.3226648 | 0.724324229  | 0.137539484 | 6.94E-07 | DPYSL2        | dihydropyrimidinase-like 2 [Source:HGNC Symbol;Acc:3014]                                 |
| 3756 | ENSG00000074800 | 10474.47284 | -0.31061184  | 0.058986265 | 6.95E-07 | ENO1          | enolase 1, (alpha) [Source:HGNC Symbol;Acc:3350]                                         |
| 3757 | ENSG00000172260 | 321.3875482 | -0.951760364 | 0.180765606 | 6.98E-07 | NEGR1         | neuronal growth regulator 1 [Source:HGNC Symbol;Acc:17302]                               |
| 3758 | ENSG00000264980 | 1082.745225 | -0.534217399 | 0.101484233 | 7.02E-07 | CHD1L         | chromodomain helicase DNA binding protein 1-like [Source:HGNC Symbol;Acc:1916]           |
| 3759 | ENSG00000167380 | 547.7361938 | 0.878623639  | 0.166915299 | 7.02E-07 | ZNF226        | zinc finger protein 226 [Source:HGNC Symbol;Acc:13019]                                   |
| 3760 | ENSG00000109943 | 154.7518636 | 1.355215865  | 0.257461756 | 7.02E-07 | CRTAM         | cytotoxic and regulatory T cell molecule [Source:HGNC Symbol;Acc:24313]                  |
| 3761 | ENSG00000143162 | 1395.050676 | -0.488772235 | 0.092873969 | 7.06E-07 | CREG1         | cellular repressor of E1A-stimulated genes 1 [Source:HGNC Symbol;Acc:2351]               |
| 3762 | ENSG00000244731 | 112.1752404 | -1.647865055 | 0.313150942 | 7.08E-07 | C4A           | complement component 4A (Rodgers blood group) [Source:HGNC Symbol;Acc:1323]              |
| 3763 | ENSG00000130052 | 329.4649861 | -0.9124958   | 0.173449624 | 7.13E-07 | STAR8         | StAR-related lipid transfer (START) domain containing 8 [Source:HGNC Symbol;Acc:19161]   |
| 3764 | ENSG00000161996 | 275.4615139 | -1.002834213 | 0.190683107 | 7.19E-07 | WDR90         | WD repeat domain 90 [Source:HGNC Symbol;Acc:26960]                                       |
| 3765 | ENSG00000028203 | 486.0405737 | 0.960389389  | 0.18262009  | 7.20E-07 | VEZT          | vezatin, adherens junctions transmembrane protein [Source:HGNC Symbol;Acc:18258]         |
| 3766 | ENSG00000115053 | 5579.493876 | 0.421813446  | 0.080214353 | 7.21E-07 | NCL           | nucleolin [Source:HGNC Symbol;Acc:7667]                                                  |
| 3767 | ENSG00000075188 | 247.8306234 | -1.021743405 | 0.194333766 | 7.25E-07 | NUP37         | nucleoporin 37kDa [Source:HGNC Symbol;Acc:29929]                                         |
| 3768 | ENSG00000224370 | 239.731017  | -1.064399598 | 0.20247486  | 7.27E-07 | RP11-814E24.3 |                                                                                          |
| 3769 | ENSG00000157637 | 1518.728618 | -0.581332517 | 0.110588759 | 7.28E-07 | SLC38A10      | solute carrier family 38, member 10 [Source:HGNC Symbol;Acc:28237]                       |
| 3770 | ENSG00000272358 | 391.4537594 | 0.839520542  | 0.159719347 | 7.30E-07 | KDM2B         | lysine (K)-specific demethylase 2B [Source:HGNC Symbol;Acc:13610]                        |
| 3771 | ENSG00000064687 | 5532.335522 | -0.484609339 | 0.092209738 | 7.33E-07 | ABCA7         | ATP-binding cassette, sub-family A (ABC1), member 7 [Source:HGNC Symbol;Acc:37]          |
| 3772 | ENSG00000139055 | 384.3475433 | -0.914052655 | 0.173974607 | 7.39E-07 | ERP27         | endoplasmic reticulum protein 27 [Source:HGNC Symbol;Acc:26495]                          |
| 3773 | ENSG00000116991 | 331.8061267 | -1.010807079 | 0.192401746 | 7.40E-07 | SIPA1L2       | signal-induced proliferation-associated 1 like 2 [Source:HGNC Symbol;Acc:23800]          |
| 3774 | ENSG00000226882 | 398.905473  | 0.933608354  | 0.177710069 | 7.40E-07 | GNL1          | guanine nucleotide binding protein-like 1 [Source:HGNC Symbol;Acc:4413]                  |

|      |                 |             |              |             |          |              |                                                                                                 |
|------|-----------------|-------------|--------------|-------------|----------|--------------|-------------------------------------------------------------------------------------------------|
| 3775 | ENSG00000162722 | 181.1775289 | 1.254150363  | 0.238725784 | 7.40E-07 | TRIM58       | tripartite motif containing 58 [Source:HGNC Symbol;Acc:24150]                                   |
| 3776 | ENSG00000023516 | 1017.269745 | 0.618202495  | 0.117746414 | 7.53E-07 | AKAP11       | A kinase (PRKA) anchor protein 11 [Source:HGNC Symbol;Acc:369]                                  |
| 3777 | ENSG00000135905 | 1146.819485 | 1.350439943  | 0.257237908 | 7.55E-07 | DOCK10       | dedicator of cytokinesis 10 [Source:HGNC Symbol;Acc:23479]                                      |
| 3778 | ENSG00000108370 | 70.95725863 | 2.156794332  | 0.411058747 | 7.66E-07 | RGS9         | regulator of G-protein signaling 9 [Source:HGNC Symbol;Acc:10004]                               |
| 3779 | ENSG00000111237 | 2922.162329 | -0.402703348 | 0.076757677 | 7.68E-07 | VPS29        | vacuolar protein sorting 29 homolog (S. cerevisiae) [Source:HGNC Symbol;Acc:14340]              |
| 3780 | ENSG00000104763 | 7080.507001 | -0.295107186 | 0.056261243 | 7.72E-07 | ASAH1        | N-acylsphingosine amidohydrolase (acid ceramidase) 1 [Source:HGNC Symbol;Acc:735]               |
| 3781 | ENSG00000136527 | 3503.907068 | -0.348211988 | 0.066389513 | 7.74E-07 | TRA2B        | transformer 2 beta homolog (Drosophila) [Source:HGNC Symbol;Acc:10781]                          |
| 3782 | ENSG00000162545 | 35.62152402 | 2.479510627  | 0.472746489 | 7.74E-07 | CAMK2N1      | calcium/calmodulin-dependent protein kinase II inhibitor 1 [Source:HGNC Symbol;Acc:24190]       |
| 3783 | ENSG00000176623 | 973.2152607 | -0.562951507 | 0.107379129 | 7.83E-07 | RMDN1        | regulator of microtubule dynamics 1 [Source:HGNC Symbol;Acc:24285]                              |
| 3784 | ENSG00000151348 | 406.1313732 | 0.830118834  | 0.158341983 | 7.83E-07 | EXT2         | exostosin glycosyltransferase 2 [Source:HGNC Symbol;Acc:3513]                                   |
| 3785 | ENSG00000151116 | 497.396777  | -0.771135913 | 0.147098881 | 7.84E-07 | UEVLD        | UEV and lactate/malate dehydrogenase domains [Source:HGNC Symbol;Acc:30866]                     |
| 3786 | ENSG00000181163 | 6182.059276 | 0.35493203   | 0.067717255 | 7.88E-07 | NPM1         | nucleophosmin (nucleolar phosphoprotein B23, numatrin) [Source:HGNC Symbol;Acc:7910]            |
| 3787 | ENSG00000136560 | 2128.746727 | -0.406880499 | 0.077630015 | 7.88E-07 | TANK         | TRAF family member-associated NFkB activator [Source:HGNC Symbol;Acc:11562]                     |
| 3788 | ENSG00000144589 | 856.2661571 | -0.627025895 | 0.11965229  | 7.92E-07 | STK11IP      | serine/threonine kinase 11 interacting protein [Source:HGNC Symbol;Acc:19184]                   |
| 3789 | ENSG00000141526 | 3625.001977 | -0.553836546 | 0.10569804  | 7.94E-07 | SLC16A3      | solute carrier family 16 (monocarboxylate transporter), member 3 [Source:HGNC Symbol;Acc:10924] |
| 3790 | ENSG00000162032 | 1007.081659 | 0.739870338  | 0.141207332 | 7.95E-07 | SPSB3        | splA/ryanodine receptor domain and SOCS box containing 3 [Source:HGNC Symbol;Acc:30629]         |
| 3791 | ENSG00000067064 | 1782.326754 | -0.486222955 | 0.092810756 | 7.98E-07 | IDI1         | isopentenyl-diphosphate delta isomerase 1 [Source:HGNC Symbol;Acc:5387]                         |
| 3792 | ENSG00000213462 | 885.5367236 | 0.615290793  | 0.117449132 | 7.98E-07 | ERV3-1       | endogenous retrovirus group 3, member 1 [Source:HGNC Symbol;Acc:3454]                           |
| 3793 | ENSG00000184731 | 36.36448976 | 2.432533137  | 0.464403326 | 8.01E-07 | FAM110C      | family with sequence similarity 110, member C [Source:HGNC Symbol;Acc:33340]                    |
| 3794 | ENSG00000262234 | 869.0027728 | -0.643234728 | 0.122830329 | 8.06E-07 | PIIP5K2      | diphosphoinositol pentakisphosphate kinase 2 [Source:HGNC Symbol;Acc:29035]                     |
| 3795 | ENSG00000234353 | 794.2605107 | -0.667661539 | 0.127504196 | 8.07E-07 | AP000347.4   |                                                                                                 |
| 3796 | ENSG00000227097 | 3122.813733 | 1.231986003  | 0.235355643 | 8.15E-07 | RP11-742N3.1 |                                                                                                 |
| 3797 | ENSG00000173852 | 380.7770686 | -0.92021541  | 0.175859603 | 8.23E-07 | DPY19L1      | dpy-19-like 1 (C. elegans) [Source:HGNC Symbol;Acc:22205]                                       |
| 3798 | ENSG00000143624 | 1747.498952 | -0.434654291 | 0.083100208 | 8.33E-07 | INTS3        | integrator complex subunit 3 [Source:HGNC Symbol;Acc:26153]                                     |
| 3799 | ENSG00000178971 | 2180.874082 | 0.436951253  | 0.083543037 | 8.34E-07 | CTC1         | CTS telomere maintenance complex component 1 [Source:HGNC Symbol;Acc:26169]                     |
| 3800 | ENSG00000042062 | 97.70647354 | -1.60865787  | 0.307630829 | 8.38E-07 | FAM65C       | family with sequence similarity 65, member C [Source:HGNC Symbol;Acc:16168]                     |
| 3801 | ENSG00000248905 | 129.5865537 | 1.836187931  | 0.351188706 | 8.41E-07 | FMN1         | formin 1 [Source:HGNC Symbol;Acc:3768]                                                          |
| 3802 | ENSG00000181896 | 728.0320319 | 0.66759646   | 0.127684432 | 8.41E-07 | ZNF101       | zinc finger protein 101 [Source:HGNC Symbol;Acc:12881]                                          |

|      |                 |             |              |             |          |            |                                                                                                                        |
|------|-----------------|-------------|--------------|-------------|----------|------------|------------------------------------------------------------------------------------------------------------------------|
| 3803 | ENSG00000163251 | 62.16272686 | -1.895796985 | 0.362593159 | 8.41E-07 | FZD5       | frizzled family receptor 5 [Source:HGNC Symbol;Acc:4043]                                                               |
| 3804 | ENSG00000073969 | 1055.182867 | -0.572853707 | 0.10959698  | 8.48E-07 | NSF        | N-ethylmaleimide-sensitive factor [Source:HGNC Symbol;Acc:8016]                                                        |
| 3805 | ENSG00000092621 | 107.5199932 | -1.669605245 | 0.319441013 | 8.49E-07 | PHGDH      | phosphoglycerate dehydrogenase [Source:HGNC Symbol;Acc:8923]                                                           |
| 3806 | ENSG00000125735 | 1085.450373 | 0.561194739  | 0.107397048 | 8.54E-07 | TNFSF14    | tumor necrosis factor (ligand) superfamily, member 14 [Source:HGNC Symbol;Acc:11930]                                   |
| 3807 | ENSG00000099942 | 2586.402006 | 0.392374354  | 0.075104564 | 8.59E-07 | CRKL       | v-crk avian sarcoma virus CT10 oncogene homolog-like [Source:HGNC Symbol;Acc:2363]                                     |
| 3808 | ENSG00000183690 | 77.21936155 | 1.819417434  | 0.348292077 | 8.61E-07 | EFHC2      | EF-hand domain (C-terminal) containing 2 [Source:HGNC Symbol;Acc:26233]                                                |
| 3809 | ENSG00000180787 | 283.8088267 | 1.009975466  | 0.193356363 | 8.63E-07 | ZFP3       | ZFP3 zinc finger protein [Source:HGNC Symbol;Acc:12861]                                                                |
| 3810 | ENSG00000150907 | 956.4311422 | 0.612002492  | 0.117202385 | 8.71E-07 | FOXO1      | forkhead box O1 [Source:HGNC Symbol;Acc:3819]                                                                          |
| 3811 | ENSG00000145860 | 3059.305934 | -0.394487721 | 0.075572732 | 8.79E-07 | RNF145     | ring finger protein 145 [Source:HGNC Symbol;Acc:20853]                                                                 |
| 3812 | ENSG00000100906 | 5163.112676 | -0.310269248 | 0.059463283 | 8.89E-07 | NFKBIA     | nuclear factor of kappa light polypeptide gene enhancer in B-cells inhibitor, alpha [Source:HGNC Symbol;Acc:7797]      |
| 3813 | ENSG00000125458 | 216.2887673 | 1.177988484  | 0.225836661 | 8.97E-07 | NT5C       | 5', 3'-nucleotidase, cytosolic [Source:HGNC Symbol;Acc:17144]                                                          |
| 3814 | ENSG00000229754 | 130.6528942 | 1.573685195  | 0.301791397 | 9.04E-07 | CXCR2P1    | chemokine (C-X-C motif) receptor 2 pseudogene 1 [Source:HGNC Symbol;Acc:6028]                                          |
| 3815 | ENSG00000186399 | 167.0959351 | -1.412880863 | 0.270990353 | 9.08E-07 | GOLGA8R    | golgin A8 family, member R [Source:HGNC Symbol;Acc:44407]                                                              |
| 3816 | ENSG00000104731 | 482.4165692 | 0.807616641  | 0.155066861 | 9.35E-07 | KLHDC4     | kelch domain containing 4 [Source:HGNC Symbol;Acc:25272]                                                               |
| 3817 | ENSG00000118242 | 102.514957  | -1.546806143 | 0.297025005 | 9.38E-07 | MREG       | melanoregulin [Source:HGNC Symbol;Acc:25478]                                                                           |
| 3818 | ENSG00000173083 | 496.4654246 | 0.847495083  | 0.16279406  | 9.46E-07 | HPSE       | heparanase [Source:HGNC Symbol;Acc:5164]                                                                               |
| 3819 | ENSG00000181007 | 147.3774021 | 1.293216068  | 0.248415352 | 9.46E-07 | ZFP82      | ZFP82 zinc finger protein [Source:HGNC Symbol;Acc:28682]                                                               |
| 3820 | ENSG00000227921 | 233.9191153 | 1.11885971   | 0.215076224 | 9.65E-07 | AL353791.1 |                                                                                                                        |
| 3821 | ENSG00000115866 | 1067.897018 | -0.552222329 | 0.106171865 | 9.70E-07 | DARS       | aspartyl-tRNA synthetase [Source:HGNC Symbol;Acc:2678]                                                                 |
| 3822 | ENSG00000114654 | 23.77397142 | 2.734666728  | 0.526128034 | 9.88E-07 | EFCC1      | EF-hand and coiled-coil domain containing 1 [Source:HGNC Symbol;Acc:25692]                                             |
| 3823 | ENSG00000164615 | 568.9518118 | 0.707399022  | 0.136105506 | 9.89E-07 | CAMLG      | calcium modulating ligand [Source:HGNC Symbol;Acc:1471]                                                                |
| 3824 | ENSG00000262985 | 312.1611813 | 1.072682127  | 0.206413312 | 9.92E-07 | LILRB1     | leukocyte immunoglobulin-like receptor, subfamily B (with TM and ITIM domains), member 1 [Source:HGNC Symbol;Acc:6605] |
| 3825 | ENSG00000111816 | 631.1255928 | -0.695280191 | 0.133805878 | 9.95E-07 | FRK        | fyn-related kinase [Source:HGNC Symbol;Acc:3955]                                                                       |
| 3826 | ENSG00000101751 | 863.9967401 | -0.788397799 | 0.151737832 | 9.97E-07 | POLI       | polymerase (DNA directed) iota [Source:HGNC Symbol;Acc:9182]                                                           |
| 3827 | ENSG00000198478 | 90.95301977 | 1.695814671  | 0.326497143 | 1.01E-06 | SH3BGR12   | SH3 domain binding glutamic acid-rich protein like 2 [Source:HGNC Symbol;Acc:15567]                                    |
| 3828 | ENSG00000175265 | 5408.35328  | 0.310388296  | 0.059764418 | 1.01E-06 | GOLGA8A    | golgin A8 family, member A [Source:HGNC Symbol;Acc:31972]                                                              |
| 3829 | ENSG00000176092 | 127.9763132 | -1.40272248  | 0.270162384 | 1.02E-06 | AIM1L      | absent in melanoma 1-like [Source:HGNC Symbol;Acc:17295]                                                               |
| 3830 | ENSG00000260890 | 66.18098394 | 2.026833997  | 0.390390333 | 1.02E-06 | TRBV7-9    | T cell receptor beta variable 7-9 [Source:HGNC Symbol;Acc:12243]                                                       |

|      |                 |             |              |             |          |           |                                                                                                                                                 |
|------|-----------------|-------------|--------------|-------------|----------|-----------|-------------------------------------------------------------------------------------------------------------------------------------------------|
| 3831 | ENSG00000165716 | 107.6394662 | 1.640068649  | 0.315990453 | 1.03E-06 | FAM69B    | family with sequence similarity 69, member B [Source:HGNC Symbol;Acc:28290]                                                                     |
| 3832 | ENSG00000187764 | 8932.575755 | 0.266004564  | 0.051268818 | 1.04E-06 | SEMA4D    | sema domain, immunoglobulin domain (Ig), transmembrane domain (TM) and short cytoplasmic domain, (semaphorin) 4D [Source:HGNC Symbol;Acc:10732] |
| 3833 | ENSG00000064666 | 17141.94396 | -0.326318517 | 0.062911931 | 1.04E-06 | CNN2      | calponin 2 [Source:HGNC Symbol;Acc:2156]                                                                                                        |
| 3834 | ENSG00000212866 | 712.6427141 | -0.76327959  | 0.147159774 | 1.04E-06 | HSPA1B    | heat shock 70kDa protein 1B [Source:HGNC Symbol;Acc:5233]                                                                                       |
| 3835 | ENSG00000185261 | 280.0645937 | -1.010134726 | 0.194803931 | 1.05E-06 | KIAA0825  | KIAA0825 [Source:HGNC Symbol;Acc:28532]                                                                                                         |
| 3836 | ENSG00000136930 | 1523.657178 | -0.487281607 | 0.093972262 | 1.05E-06 | PSMB7     | proteasome (prosome, macropain) subunit, beta type, 7 [Source:HGNC Symbol;Acc:9544]                                                             |
| 3837 | ENSG00000205581 | 5112.970888 | -0.349173912 | 0.067358444 | 1.06E-06 | HMGN1     | high mobility group nucleosome binding domain 1 [Source:HGNC Symbol;Acc:4984]                                                                   |
| 3838 | ENSG00000115365 | 699.9741888 | 0.637879259  | 0.123069075 | 1.06E-06 | LANCL1    | LanC lantibiotic synthetase component C-like 1 (bacterial) [Source:HGNC Symbol;Acc:6508]                                                        |
| 3839 | ENSG00000141682 | 559.6837788 | 0.726785594  | 0.140256741 | 1.07E-06 | PMAIP1    | phorbol-12-myristate-13-acetate-induced protein 1 [Source:HGNC Symbol;Acc:9108]                                                                 |
| 3840 | ENSG00000064886 | 123.4964866 | 1.515555248  | 0.292506112 | 1.07E-06 | CHI3L2    | chitinase 3-like 2 [Source:HGNC Symbol;Acc:1933]                                                                                                |
| 3841 | ENSG00000134748 | 1614.992299 | -0.537705465 | 0.103804091 | 1.08E-06 | PRPF38A   | pre-mRNA processing factor 38A [Source:HGNC Symbol;Acc:25930]                                                                                   |
| 3842 | ENSG00000090857 | 1677.248093 | 0.453885361  | 0.087636905 | 1.09E-06 | PDPR      | pyruvate dehydrogenase phosphatase regulatory subunit [Source:HGNC Symbol;Acc:30264]                                                            |
| 3843 | ENSG00000070814 | 867.287976  | 0.657667365  | 0.126992643 | 1.09E-06 | TCOF1     | Treacher Collins-Franceschetti syndrome 1 [Source:HGNC Symbol;Acc:11654]                                                                        |
| 3844 | ENSG00000197020 | 324.1670729 | -1.043050186 | 0.201416979 | 1.09E-06 | ZNF100    | zinc finger protein 100 [Source:HGNC Symbol;Acc:12880]                                                                                          |
| 3845 | ENSG00000180178 | 148.9707326 | -1.345809584 | 0.259883497 | 1.09E-06 | FAR2P1    | fatty acyl CoA reductase 2 pseudogene 1 [Source:HGNC Symbol;Acc:49284]                                                                          |
| 3846 | ENSG00000116990 | 141.5582263 | 1.372928828  | 0.265171816 | 1.09E-06 | MYCL      | v-myc avian myelocytomatosis viral oncogene lung carcinoma derived homolog [Source:HGNC Symbol;Acc:7555]                                        |
| 3847 | ENSG00000164087 | 139.1811585 | -1.333947526 | 0.257649227 | 1.09E-06 | POC1A     | POC1 centriolar protein A [Source:HGNC Symbol;Acc:24488]                                                                                        |
| 3848 | ENSG00000162367 | 280.3428256 | -0.95695604  | 0.184841972 | 1.10E-06 | TAL1      | T-cell acute lymphocytic leukemia 1 [Source:HGNC Symbol;Acc:11556]                                                                              |
| 3849 | ENSG00000154556 | 28.00483404 | 2.543137785  | 0.491232272 | 1.10E-06 | SORBS2    | sorbin and SH3 domain containing 2 [Source:HGNC Symbol;Acc:24098]                                                                               |
| 3850 | ENSG00000116299 | 1541.576403 | 0.55915      | 0.108064786 | 1.11E-06 | KIAA1324  | KIAA1324 [Source:HGNC Symbol;Acc:29618]                                                                                                         |
| 3851 | ENSG00000145916 | 580.8057313 | -0.722276324 | 0.139645422 | 1.12E-06 | RMND5B    | required for meiotic nuclear division 5 homolog B (S. cerevisiae) [Source:HGNC Symbol;Acc:26181]                                                |
| 3852 | ENSG00000167280 | 1093.189653 | 0.700880791  | 0.135535498 | 1.13E-06 | ENGASE    | endo-beta-N-acetylglucosaminidase [Source:HGNC Symbol;Acc:24622]                                                                                |
| 3853 | ENSG00000198938 | 130062.3343 | -0.250206536 | 0.04839671  | 1.14E-06 | MT-CO3    | mitochondrially encoded cytochrome c oxidase III [Source:HGNC Symbol;Acc:7422]                                                                  |
| 3854 | ENSG00000160208 | 571.1504549 | 0.694680272  | 0.134405874 | 1.15E-06 | RRP1B     | ribosomal RNA processing 1B [Source:HGNC Symbol;Acc:23818]                                                                                      |
| 3855 | ENSG00000257365 | 442.034708  | -0.783048448 | 0.151573855 | 1.16E-06 | FNTB      | farnesyltransferase, CAAX box, beta [Source:HGNC Symbol;Acc:3785]                                                                               |
| 3856 | ENSG00000124383 | 456.9853    | 0.789015923  | 0.152729891 | 1.16E-06 | MPHOSPH10 | M-phase phosphoprotein 10 (U3 small nucleolar ribonucleoprotein) [Source:HGNC Symbol;Acc:7213]                                                  |
| 3857 | ENSG00000099904 | 231.1916731 | 1.130943998  | 0.218921512 | 1.16E-06 | ZDHC8     | zinc finger, DHHC-type containing 8 [Source:HGNC Symbol;Acc:18474]                                                                              |
| 3858 | ENSG00000136450 | 4502.639659 | -0.306333785 | 0.059300187 | 1.16E-06 | SRSF1     | serine/arginine-rich splicing factor 1 [Source:HGNC Symbol;Acc:10780]                                                                           |



|      |                 |             |              |             |          |               |                                                                                                                   |
|------|-----------------|-------------|--------------|-------------|----------|---------------|-------------------------------------------------------------------------------------------------------------------|
| 3859 | ENSG00000186063 | 965.7455786 | 0.592099834  | 0.114647306 | 1.17E-06 | AIDA          | axin interactor, dorsalization associated [Source:HGNC Symbol;Acc:25761]                                          |
| 3860 | ENSG00000142583 | 2712.909935 | -0.401421406 | 0.07774026  | 1.17E-06 | SLC2A5        | solute carrier family 2 (facilitated glucose/fructose transporter), member 5 [Source:HGNC Symbol;Acc:11010]       |
| 3861 | ENSG00000196912 | 535.4443488 | -0.762044851 | 0.147634905 | 1.19E-06 | ANKRD36B      | ankyrin repeat domain 36B [Source:HGNC Symbol;Acc:29333]                                                          |
| 3862 | ENSG00000198692 | 1007.870659 | 0.557081419  | 0.107947723 | 1.19E-06 | EIF1AY        | eukaryotic translation initiation factor 1A, Y-linked [Source:HGNC Symbol;Acc:3252]                               |
| 3863 | ENSG00000168528 | 58.93342466 | -2.018648042 | 0.391161178 | 1.19E-06 | SERINC2       | serine incorporator 2 [Source:HGNC Symbol;Acc:23231]                                                              |
| 3864 | ENSG00000159147 | 408.3542549 | -0.800304817 | 0.15510824  | 1.20E-06 | DONSON        | downstream neighbor of SON [Source:HGNC Symbol;Acc:2993]                                                          |
| 3865 | ENSG00000163728 | 3315.191583 | -0.439913814 | 0.085310047 | 1.22E-06 | TTC14         | tetratricopeptide repeat domain 14 [Source:HGNC Symbol;Acc:24697]                                                 |
| 3866 | ENSG00000126970 | 93.84041515 | 1.642695804  | 0.318735129 | 1.24E-06 | ZC4H2         | zinc finger, C4H2 domain containing [Source:HGNC Symbol;Acc:24931]                                                |
| 3867 | ENSG00000100379 | 83.76320694 | 1.815648905  | 0.352403208 | 1.25E-06 | KCTD17        | potassium channel tetramerization domain containing 17 [Source:HGNC Symbol;Acc:25705]                             |
| 3868 | ENSG00000170776 | 7285.131889 | 0.297437054  | 0.057746124 | 1.26E-06 | AKAP13        | A kinase (PRKA) anchor protein 13 [Source:HGNC Symbol;Acc:371]                                                    |
| 3869 | ENSG00000107863 | 436.8572194 | 0.90325812   | 0.175400888 | 1.26E-06 | ARHGAP21      | Rho GTPase activating protein 21 [Source:HGNC Symbol;Acc:23725]                                                   |
| 3870 | ENSG00000184110 | 3076.256115 | 0.480530797  | 0.093316498 | 1.26E-06 | EIF3C         | eukaryotic translation initiation factor 3, subunit C [Source:HGNC Symbol;Acc:3279]                               |
| 3871 | ENSG00000115904 | 1972.387451 | -0.517051355 | 0.100416954 | 1.27E-06 | SOS1          | son of sevenless homolog 1 (Drosophila) [Source:HGNC Symbol;Acc:11187]                                            |
| 3872 | ENSG00000203485 | 306.8717433 | 1.039094973  | 0.20182668  | 1.27E-06 | INF2          | inverted formin, FH2 and WH2 domain containing [Source:HGNC Symbol;Acc:23791]                                     |
| 3873 | ENSG00000137135 | 160.075753  | -1.309540268 | 0.254414393 | 1.28E-06 | ARHGEF39      | Rho guanine nucleotide exchange factor (GEF) 39 [Source:HGNC Symbol;Acc:25909]                                    |
| 3874 | ENSG00000111788 | 313.4930177 | -0.902247333 | 0.175319428 | 1.28E-06 | RP11-22B23.1  |                                                                                                                   |
| 3875 | ENSG00000251139 | 34.59385457 | -2.422302624 | 0.470706687 | 1.28E-06 | RP11-701P16.2 | Uncharacterized protein [Source:UniProtKB/TrEMBL;Acc:D6RF06]                                                      |
| 3876 | ENSG00000117859 | 2068.487403 | -0.502759782 | 0.097717071 | 1.29E-06 | OSBPL9        | oxysterol binding protein-like 9 [Source:HGNC Symbol;Acc:16386]                                                   |
| 3877 | ENSG00000130741 | 2939.823295 | 0.364561446  | 0.070863408 | 1.29E-06 | EIF2S3        | eukaryotic translation initiation factor 2, subunit 3 gamma, 52kDa [Source:HGNC Symbol;Acc:3267]                  |
| 3878 | ENSG00000198324 | 63.86379121 | 1.89717916   | 0.368874171 | 1.30E-06 | FAM109A       | family with sequence similarity 109, member A [Source:HGNC Symbol;Acc:26509]                                      |
| 3879 | ENSG00000260384 | 58.79271834 | -2.016928007 | 0.392160655 | 1.30E-06 | SERINC2       | serine incorporator 2 [Source:HGNC Symbol;Acc:23231]                                                              |
| 3880 | ENSG00000172007 | 880.6776341 | -0.57951358  | 0.112706974 | 1.31E-06 | RAB33B        | RAB33B, member RAS oncogene family [Source:HGNC Symbol;Acc:16075]                                                 |
| 3881 | ENSG00000185043 | 1355.894068 | 0.54852328   | 0.10671586  | 1.32E-06 | CIB1          | calcium and integrin binding 1 (calmyrin) [Source:HGNC Symbol;Acc:16920]                                          |
| 3882 | ENSG00000153487 | 616.7442822 | -0.760665997 | 0.148007789 | 1.33E-06 | ING1          | inhibitor of growth family, member 1 [Source:HGNC Symbol;Acc:6062]                                                |
| 3883 | ENSG00000218672 | 16.08901923 | 2.85190444   | 0.554977829 | 1.33E-06 | AC008060.7    | HCG2000720; Hypothetical gene supported by AK054822; Uncharacterized protein [Source:UniProtKB/TrEMBL;Acc:A4D251] |
| 3884 | ENSG00000102970 | 32.40343207 | 2.513006087  | 0.489103274 | 1.34E-06 | CCL17         | chemokine (C-C motif) ligand 17 [Source:HGNC Symbol;Acc:10615]                                                    |
| 3885 | ENSG00000119638 | 2415.933085 | -0.389552548 | 0.075822288 | 1.34E-06 | NEK9          | NIMA-related kinase 9 [Source:HGNC Symbol;Acc:18591]                                                              |
| 3886 | ENSG00000172771 | 289.7279612 | -0.947572183 | 0.184438809 | 1.34E-06 | EFCAB12       | EF-hand calcium binding domain 12 [Source:HGNC Symbol;Acc:28061]                                                  |

|      |                 |             |              |             |          |           |                                                                                                                             |
|------|-----------------|-------------|--------------|-------------|----------|-----------|-----------------------------------------------------------------------------------------------------------------------------|
| 3887 | ENSG00000173638 | 1504.096751 | 0.509698353  | 0.099240134 | 1.35E-06 | SLC19A1   | solute carrier family 19 (folate transporter), member 1 [Source:HGNC Symbol;Acc:10937]                                      |
| 3888 | ENSG00000079263 | 708.1899851 | 0.642886681  | 0.125182934 | 1.35E-06 | SP140     | SP140 nuclear body protein [Source:HGNC Symbol;Acc:17133]                                                                   |
| 3889 | ENSG00000162191 | 1774.526378 | 0.507761286  | 0.098920812 | 1.37E-06 | UBXN1     | UBX domain protein 1 [Source:HGNC Symbol;Acc:18402]                                                                         |
| 3890 | ENSG00000185112 | 289.480889  | 0.983288002  | 0.191562597 | 1.37E-06 | FAM43A    | family with sequence similarity 43, member A [Source:HGNC Symbol;Acc:26888]                                                 |
| 3891 | ENSG00000106992 | 272.8681264 | 1.084774978  | 0.21137886  | 1.38E-06 | AK1       | adenylate kinase 1 [Source:HGNC Symbol;Acc:361]                                                                             |
| 3892 | ENSG00000141002 | 2241.391897 | 0.438573206  | 0.085507637 | 1.40E-06 | TCF25     | transcription factor 25 (basic helix-loop-helix) [Source:HGNC Symbol;Acc:29181]                                             |
| 3893 | ENSG00000153574 | 733.5794066 | -0.622963089 | 0.121466731 | 1.40E-06 | RPIA      | ribose 5-phosphate isomerase A [Source:HGNC Symbol;Acc:10297]                                                               |
| 3894 | ENSG00000099889 | 71.02655855 | 1.81089111   | 0.353101339 | 1.40E-06 | ARVCF     | armadillo repeat gene deleted in velocardiocardial syndrome [Source:HGNC Symbol;Acc:728]                                    |
| 3895 | ENSG00000144655 | 977.6216834 | -0.545472418 | 0.106365387 | 1.40E-06 | CSRNP1    | cysteine-serine-rich nuclear protein 1 [Source:HGNC Symbol;Acc:14300]                                                       |
| 3896 | ENSG00000138760 | 837.3205232 | -0.635842345 | 0.124034033 | 1.42E-06 | SCARB2    | scavenger receptor class B, member 2 [Source:HGNC Symbol;Acc:1665]                                                          |
| 3897 | ENSG00000174776 | 24.36451706 | 2.70371247   | 0.527569678 | 1.43E-06 | WDR49     | WD repeat domain 49 [Source:HGNC Symbol;Acc:26587]                                                                          |
| 3898 | ENSG00000101654 | 770.2293013 | 0.674239508  | 0.131570975 | 1.43E-06 | RNMT      | RNA (guanine-7-) methyltransferase [Source:HGNC Symbol;Acc:10075]                                                           |
| 3899 | ENSG00000131016 | 152.958966  | 1.306065738  | 0.254865683 | 1.43E-06 | AKAP12    | A kinase (PRKA) anchor protein 12 [Source:HGNC Symbol;Acc:370]                                                              |
| 3900 | ENSG00000031081 | 137.6746002 | 1.393020248  | 0.27186542  | 1.44E-06 | ARHGAP31  | Rho GTPase activating protein 31 [Source:HGNC Symbol;Acc:29216]                                                             |
| 3901 | ENSG00000187514 | 15384.40762 | 0.267113492  | 0.052139722 | 1.44E-06 | PTMA      | prothymosin, alpha [Source:HGNC Symbol;Acc:9623]                                                                            |
| 3902 | ENSG00000133858 | 3711.034475 | -0.398408613 | 0.077777492 | 1.45E-06 | ZFC3H1    | zinc finger, C3H1-type containing [Source:HGNC Symbol;Acc:28328]                                                            |
| 3903 | ENSG00000213949 | 235.4777136 | -1.165954104 | 0.227709276 | 1.46E-06 | ITGA1     | integrin, alpha 1 [Source:HGNC Symbol;Acc:6134]                                                                             |
| 3904 | ENSG00000178719 | 1193.137161 | -0.661197276 | 0.129137672 | 1.46E-06 | GRINA     | glutamate receptor, ionotropic, N-methyl D-aspartate-associated protein 1 (glutamate binding) [Source:HGNC Symbol;Acc:4589] |
| 3905 | ENSG00000178445 | 28.03873733 | 2.462325339  | 0.481091439 | 1.48E-06 | GLDC      | glycine dehydrogenase (decarboxylating) [Source:HGNC Symbol;Acc:4313]                                                       |
| 3906 | ENSG00000148337 | 1556.772127 | -0.462138209 | 0.090315066 | 1.49E-06 | CIZ1      | CDKN1A interacting zinc finger protein 1 [Source:HGNC Symbol;Acc:16744]                                                     |
| 3907 | ENSG00000197183 | 1667.24149  | 0.466361751  | 0.091146161 | 1.49E-06 | C20orf112 | chromosome 20 open reading frame 112 [Source:HGNC Symbol;Acc:16106]                                                         |
| 3908 | ENSG00000205060 | 291.5102602 | 1.081462096  | 0.211470897 | 1.51E-06 | SLC35B4   | solute carrier family 35 (UDP-xylose/UDP-N-acetylglucosamine transporter), member B4 [Source:HGNC Symbol;Acc:20584]         |
| 3909 | ENSG00000104490 | 249.1636726 | 1.170109181  | 0.228815656 | 1.51E-06 | NCALD     | neurocalcin delta [Source:HGNC Symbol;Acc:7655]                                                                             |
| 3910 | ENSG00000188321 | 529.2393041 | 0.76399529   | 0.149446684 | 1.52E-06 | ZNF559    | zinc finger protein 559 [Source:HGNC Symbol;Acc:28197]                                                                      |
| 3911 | ENSG00000127980 | 751.273138  | 0.642091277  | 0.125608105 | 1.53E-06 | PEX1      | peroxisomal biogenesis factor 1 [Source:HGNC Symbol;Acc:8850]                                                               |
| 3912 | ENSG00000211807 | 37.89503073 | 2.453323062  | 0.480170756 | 1.55E-06 | TRAV26-1  | T cell receptor alpha variable 26-1 [Source:HGNC Symbol;Acc:12123]                                                          |
| 3913 | ENSG00000099331 | 8069.650242 | -0.335882121 | 0.065741163 | 1.55E-06 | MYO9B     | myosin IXB [Source:HGNC Symbol;Acc:7609]                                                                                    |
| 3914 | ENSG00000081791 | 2045.850549 | -0.443034997 | 0.086715189 | 1.55E-06 | KIAA0141  | KIAA0141 [Source:HGNC Symbol;Acc:28969]                                                                                     |

|      |                 |             |              |             |          |          |                                                                                                         |
|------|-----------------|-------------|--------------|-------------|----------|----------|---------------------------------------------------------------------------------------------------------|
| 3915 | ENSG00000121621 | 123.6532604 | -1.423808802 | 0.278717786 | 1.55E-06 | KIF18A   | kinesin family member 18A [Source:HGNC Symbol;Acc:29441]                                                |
| 3916 | ENSG00000157933 | 1766.579977 | 0.460053979  | 0.090066429 | 1.56E-06 | SKI      | v-ski avian sarcoma viral oncogene homolog [Source:HGNC Symbol;Acc:10896]                               |
| 3917 | ENSG00000115956 | 10812.71834 | -0.26656568  | 0.052227307 | 1.59E-06 | PLEK     | pleckstrin [Source:HGNC Symbol;Acc:9070]                                                                |
| 3918 | ENSG00000171503 | 537.8570418 | -0.74445571  | 0.145879045 | 1.59E-06 | ETFDH    | electron-transferring-flavoprotein dehydrogenase [Source:HGNC Symbol;Acc:3483]                          |
| 3919 | ENSG00000141469 | 276.5161587 | 1.1849727    | 0.232424584 | 1.64E-06 | SLC14A1  | solute carrier family 14 (urea transporter), member 1 (Kidd blood group) [Source:HGNC Symbol;Acc:10918] |
| 3920 | ENSG00000163681 | 1301.632618 | -0.553854456 | 0.108635583 | 1.64E-06 | SLMAP    | sarcolemma associated protein [Source:HGNC Symbol;Acc:16643]                                            |
| 3921 | ENSG00000105866 | 510.3416671 | 0.783803418  | 0.153753396 | 1.64E-06 | SP4      | Sp4 transcription factor [Source:HGNC Symbol;Acc:11209]                                                 |
| 3922 | ENSG00000198885 | 95.58520021 | 1.590393849  | 0.312030395 | 1.65E-06 | ITPRIPL1 | inositol 1,4,5-trisphosphate receptor interacting protein-like 1 [Source:HGNC Symbol;Acc:29371]         |
| 3923 | ENSG00000188785 | 544.0908627 | 0.758512998  | 0.148863881 | 1.66E-06 | ZNF548   | zinc finger protein 548 [Source:HGNC Symbol;Acc:26561]                                                  |
| 3924 | ENSG00000197019 | 236.2553655 | -1.050397993 | 0.206151551 | 1.66E-06 | SERTAD1  | SERTA domain containing 1 [Source:HGNC Symbol;Acc:17932]                                                |
| 3925 | ENSG00000240972 | 229.2790446 | 1.213269337  | 0.238164234 | 1.67E-06 | MIF      | macrophage migration inhibitory factor (glycosylation-inhibiting factor) [Source:HGNC Symbol;Acc:7097]  |
| 3926 | ENSG00000053900 | 1689.530291 | -0.529271822 | 0.103909053 | 1.67E-06 | ANAPC4   | anaphase promoting complex subunit 4 [Source:HGNC Symbol;Acc:19990]                                     |
| 3927 | ENSG00000088543 | 110.4209737 | 1.560669345  | 0.306453165 | 1.68E-06 | C3orf18  | chromosome 3 open reading frame 18 [Source:HGNC Symbol;Acc:24837]                                       |
| 3928 | ENSG00000074660 | 656.6064415 | 0.749134665  | 0.147183263 | 1.71E-06 | SCARF1   | scavenger receptor class F, member 1 [Source:HGNC Symbol;Acc:16820]                                     |
| 3929 | ENSG00000115942 | 990.5420279 | -0.586289017 | 0.115191046 | 1.71E-06 | ORC2     | origin recognition complex, subunit 2 [Source:HGNC Symbol;Acc:8488]                                     |
| 3930 | ENSG00000137731 | 28.07899418 | 2.541137177  | 0.499520531 | 1.73E-06 | FXD2     | FXD domain containing ion transport regulator 2 [Source:HGNC Symbol;Acc:4026]                           |
| 3931 | ENSG00000143437 | 1393.646972 | -0.472637143 | 0.092915066 | 1.73E-06 | ARNT     | aryl hydrocarbon receptor nuclear translocator [Source:HGNC Symbol;Acc:700]                             |
| 3932 | ENSG00000164823 | 1145.364911 | 0.524079756  | 0.103082874 | 1.76E-06 | OSGIN2   | oxidative stress induced growth inhibitor family member 2 [Source:HGNC Symbol;Acc:1355]                 |
| 3933 | ENSG00000162869 | 1461.528286 | -0.48778044  | 0.095949226 | 1.76E-06 | PPP1R21  | protein phosphatase 1, regulatory subunit 21 [Source:HGNC Symbol;Acc:30595]                             |
| 3934 | ENSG00000068831 | 5884.71075  | 0.414158947  | 0.081477259 | 1.77E-06 | RASGRP2  | RAS guanyl releasing protein 2 (calcium and DAG-regulated) [Source:HGNC Symbol;Acc:9879]                |
| 3935 | ENSG00000185658 | 2011.883745 | 0.450816946  | 0.088704437 | 1.77E-06 | BRWD1    | bromodomain and WD repeat domain containing 1 [Source:HGNC Symbol;Acc:12760]                            |
| 3936 | ENSG00000069998 | 273.2027287 | 0.997311072  | 0.19627676  | 1.78E-06 | CECR5    | cat eye syndrome chromosome region, candidate 5 [Source:HGNC Symbol;Acc:1843]                           |
| 3937 | ENSG00000180071 | 294.6928189 | -0.961721574 | 0.189280124 | 1.79E-06 | ANKRD18A | ankyrin repeat domain 18A [Source:HGNC Symbol;Acc:23643]                                                |
| 3938 | ENSG00000250361 | 46.90461956 | -2.149068148 | 0.42305126  | 1.79E-06 | GYPB     | glycophorin B (MNS blood group) [Source:HGNC Symbol;Acc:4703]                                           |
| 3939 | ENSG00000106868 | 811.3913053 | -0.642408135 | 0.126507112 | 1.81E-06 | SUSD1    | sushi domain containing 1 [Source:HGNC Symbol;Acc:25413]                                                |
| 3940 | ENSG00000141905 | 995.023832  | -0.557631829 | 0.109815732 | 1.81E-06 | NFIC     | nuclear factor I/C (CCAAT-binding transcription factor) [Source:HGNC Symbol;Acc:7786]                   |
| 3941 | ENSG00000170927 | 41.03235205 | -2.270749511 | 0.447292914 | 1.82E-06 | PKHD1    | polycystic kidney and hepatic disease 1 (autosomal recessive) [Source:HGNC Symbol;Acc:9016]             |
| 3942 | ENSG00000232804 | 607.8715181 | -0.960667896 | 0.189236108 | 1.82E-06 | HSPA1B   | heat shock 70kDa protein 1B [Source:HGNC Symbol;Acc:5233]                                               |

|      |                 |             |              |             |          |               |                                                                                                                                   |
|------|-----------------|-------------|--------------|-------------|----------|---------------|-----------------------------------------------------------------------------------------------------------------------------------|
| 3943 | ENSG00000075239 | 607.7654924 | -0.737373156 | 0.145254905 | 1.83E-06 | ACAT1         | acetyl-CoA acetyltransferase 1 [Source:HGNC Symbol;Acc:93]                                                                        |
| 3944 | ENSG00000186566 | 1547.142746 | 0.502592686  | 0.099063946 | 1.85E-06 | GPATCH8       | G patch domain containing 8 [Source:HGNC Symbol;Acc:29066]                                                                        |
| 3945 | ENSG00000260128 | 119.7264957 | -1.417261329 | 0.279364421 | 1.86E-06 | ULK4P2        | ULK4 pseudogene 2 [Source:HGNC Symbol;Acc:15776]                                                                                  |
| 3946 | ENSG00000131069 | 1401.628243 | -0.52344005  | 0.10318147  | 1.86E-06 | ACSS2         | acyl-CoA synthetase short-chain family member 2 [Source:HGNC Symbol;Acc:15814]                                                    |
| 3947 | ENSG00000170382 | 265.9998754 | 1.012386881  | 0.199576229 | 1.86E-06 | LRRN2         | leucine rich repeat neuronal 2 [Source:HGNC Symbol;Acc:16914]                                                                     |
| 3948 | ENSG00000161835 | 74.07784613 | 1.763473152  | 0.347642576 | 1.86E-06 | GRASP         | GRP1 (general receptor for phosphoinositides 1)-associated scaffold protein [Source:HGNC Symbol;Acc:18707]                        |
| 3949 | ENSG00000103740 | 104.7356063 | -1.48397764  | 0.292571956 | 1.86E-06 | ACSBG1        | acyl-CoA synthetase bubblegum family member 1 [Source:HGNC Symbol;Acc:29567]                                                      |
| 3950 | ENSG00000243452 | 556.2908832 | 1.748044798  | 0.344768913 | 1.88E-06 | NBPF15        | neuroblastoma breakpoint family, member 15 [Source:HGNC Symbol;Acc:28791]                                                         |
| 3951 | ENSG00000171033 | 101.7674976 | 1.597477061  | 0.315096565 | 1.89E-06 | PKIA          | protein kinase (cAMP-dependent, catalytic) inhibitor alpha [Source:HGNC Symbol;Acc:9017]                                          |
| 3952 | ENSG00000077549 | 8260.886194 | -0.271139345 | 0.05348743  | 1.89E-06 | CAPZB         | capping protein (actin filament) muscle Z-line, beta [Source:HGNC Symbol;Acc:1491]                                                |
| 3953 | ENSG00000269326 | 1800.563083 | -0.43389694  | 0.085642356 | 1.92E-06 | MPP1          | membrane protein, palmitoylated 1, 55kDa [Source:HGNC Symbol;Acc:7219]                                                            |
| 3954 | ENSG00000049759 | 81.26549517 | -1.984290444 | 0.391822209 | 1.94E-06 | NEDD4L        | neural precursor cell expressed, developmentally down-regulated 4-like, E3 ubiquitin protein ligase [Source:HGNC Symbol;Acc:7728] |
| 3955 | ENSG00000006114 | 2096.667615 | 0.466531206  | 0.0921484   | 1.95E-06 | SYNRG         | synergin, gamma [Source:HGNC Symbol;Acc:557]                                                                                      |
| 3956 | ENSG00000108651 | 1205.24555  | 0.6118197    | 0.120893167 | 1.97E-06 | UTP6          | UTP6, small subunit (SSU) processome component, homolog (yeast) [Source:HGNC Symbol;Acc:18279]                                    |
| 3957 | ENSG00000146263 | 546.876606  | -0.880548843 | 0.173994847 | 1.97E-06 | MMS22L        | MMS22-like, DNA repair protein [Source:HGNC Symbol;Acc:21475]                                                                     |
| 3958 | ENSG00000085721 | 576.2465494 | 0.72311074   | 0.142902561 | 1.98E-06 | RRN3          | RRN3 RNA polymerase I transcription factor homolog ( <i>S. cerevisiae</i> ) [Source:HGNC Symbol;Acc:30346]                        |
| 3959 | ENSG00000143570 | 684.3649515 | 0.63198588   | 0.12489445  | 1.98E-06 | SLC39A1       | solute carrier family 39 (zinc transporter), member 1 [Source:HGNC Symbol;Acc:12876]                                              |
| 3960 | ENSG00000151079 | 37.93179978 | 2.323475081  | 0.459238406 | 1.99E-06 | KCNA6         | potassium voltage-gated channel, shaker-related subfamily, member 6 [Source:HGNC Symbol;Acc:6225]                                 |
| 3961 | ENSG00000109062 | 4892.203921 | 0.350527661  | 0.06928722  | 1.99E-06 | SLC9A3R1      | solute carrier family 9, subfamily A (NHE3, cation proton antiporter 3), member 3 regulator 1 [Source:HGNC Symbol;Acc:11075]      |
| 3962 | ENSG00000130830 | 1800.344621 | -0.433193716 | 0.085633794 | 1.99E-06 | MPP1          | membrane protein, palmitoylated 1, 55kDa [Source:HGNC Symbol;Acc:7219]                                                            |
| 3963 | ENSG00000080824 | 8176.846165 | -0.302936578 | 0.05990886  | 2.02E-06 | HSP90AA1      | heat shock protein 90kDa alpha (cytosolic), class A member 1 [Source:HGNC Symbol;Acc:5253]                                        |
| 3964 | ENSG00000238208 | 522.3350152 | -0.737600919 | 0.145919255 | 2.03E-06 | RP11-112N13.1 |                                                                                                                                   |
| 3965 | ENSG00000085491 | 637.2855392 | -0.653653596 | 0.129340106 | 2.04E-06 | SLC25A24      | solute carrier family 25 (mitochondrial carrier; phosphate carrier), member 24 [Source:HGNC Symbol;Acc:20662]                     |
| 3966 | ENSG00000166451 | 101.2803011 | -1.479233105 | 0.292767209 | 2.06E-06 | CENPN         | centromere protein N [Source:HGNC Symbol;Acc:30873]                                                                               |
| 3967 | ENSG00000174292 | 53.92588446 | 2.065958208  | 0.408911087 | 2.06E-06 | TNK1          | tyrosine kinase, non-receptor, 1 [Source:HGNC Symbol;Acc:11940]                                                                   |
| 3968 | ENSG00000061918 | 83.22457191 | 1.641686105  | 0.324960825 | 2.06E-06 | GUCY1B3       | guanylate cyclase 1, soluble, beta 3 [Source:HGNC Symbol;Acc:4687]                                                                |
| 3969 | ENSG00000083312 | 2099.539425 | -0.446606645 | 0.088430829 | 2.08E-06 | TNPO1         | transportin 1 [Source:HGNC Symbol;Acc:6401]                                                                                       |
| 3970 | ENSG00000100994 | 758.5057396 | 0.663886286  | 0.131533302 | 2.11E-06 | PYGB          | phosphorylase, glycogen; brain [Source:HGNC Symbol;Acc:9723]                                                                      |

|      |                 |             |              |             |          |               |                                                                                                         |
|------|-----------------|-------------|--------------|-------------|----------|---------------|---------------------------------------------------------------------------------------------------------|
| 3971 | ENSG00000170325 | 516.3049446 | -0.705212914 | 0.139759581 | 2.13E-06 | PRDM10        | PR domain containing 10 [Source:HGNC Symbol;Acc:13995]                                                  |
| 3972 | ENSG00000104643 | 668.2432088 | -0.672761004 | 0.133357639 | 2.14E-06 | MTMR9         | myotubularin related protein 9 [Source:HGNC Symbol;Acc:14596]                                           |
| 3973 | ENSG00000166377 | 694.3955204 | -0.733898506 | 0.145528363 | 2.16E-06 | ATP9B         | ATPase, class II, type 9B [Source:HGNC Symbol;Acc:13541]                                                |
| 3974 | ENSG00000167670 | 414.2639593 | -0.883307143 | 0.175202271 | 2.17E-06 | CHAF1A        | chromatin assembly factor 1, subunit A (p150) [Source:HGNC Symbol;Acc:1910]                             |
| 3975 | ENSG00000066405 | 66.0679204  | -1.845068545 | 0.366036894 | 2.18E-06 | CLDN18        | claudin 18 [Source:HGNC Symbol;Acc:2039]                                                                |
| 3976 | ENSG00000115128 | 1185.00553  | -0.490897307 | 0.097403424 | 2.19E-06 | SF3B14        | Pre-mRNA branch site protein p14 [Source:UniProtKB/Swiss-Prot;Acc:Q9Y3B4]                               |
| 3977 | ENSG00000065989 | 142.7148625 | 1.39117384   | 0.276099505 | 2.21E-06 | PDE4A         | phosphodiesterase 4A, cAMP-specific [Source:HGNC Symbol;Acc:8780]                                       |
| 3978 | ENSG00000124160 | 837.7496666 | 0.592978687  | 0.117723714 | 2.22E-06 | NCOA5         | nuclear receptor coactivator 5 [Source:HGNC Symbol;Acc:15909]                                           |
| 3979 | ENSG00000133878 | 16.279396   | 2.821847618  | 0.560517596 | 2.25E-06 | DUSP26        | dual specificity phosphatase 26 (putative) [Source:HGNC Symbol;Acc:28161]                               |
| 3980 | ENSG00000136689 | 2118.301825 | -0.390185811 | 0.077516884 | 2.26E-06 | IL1RN         | interleukin 1 receptor antagonist [Source:HGNC Symbol;Acc:6000]                                         |
| 3981 | ENSG00000080819 | 409.2297191 | -0.775072001 | 0.154057382 | 2.29E-06 | CPOX          | coproporphyrinogen oxidase [Source:HGNC Symbol;Acc:2321]                                                |
| 3982 | ENSG00000157557 | 1533.498615 | -0.436955614 | 0.086857578 | 2.30E-06 | ETS2          | v-ets avian erythroblastosis virus E26 oncogene homolog 2 [Source:HGNC Symbol;Acc:3489]                 |
| 3983 | ENSG00000152207 | 59.84105353 | 1.99421024   | 0.396809526 | 2.36E-06 | CYSLTR2       | cysteinyl leukotriene receptor 2 [Source:HGNC Symbol;Acc:18274]                                         |
| 3984 | ENSG00000257743 | 348.2222043 | -0.892022828 | 0.177631089 | 2.40E-06 | RP11-1220K2.2 | Putative inactive maltase-glucoamylase-like protein LOC93432 [Source:UniProtKB/Swiss-Prot;Acc:Q2M2H8]   |
| 3985 | ENSG00000186638 | 82.70201841 | -1.609414413 | 0.320666313 | 2.44E-06 | KIF24         | kinesin family member 24 [Source:HGNC Symbol;Acc:19916]                                                 |
| 3986 | ENSG00000082805 | 418.5216283 | -0.846310778 | 0.168672221 | 2.46E-06 | ERC1          | ELKS/RAB6-interacting/CAST family member 1 [Source:HGNC Symbol;Acc:17072]                               |
| 3987 | ENSG00000196214 | 460.3489876 | 0.780109979  | 0.155491928 | 2.46E-06 | ZNF766        | zinc finger protein 766 [Source:HGNC Symbol;Acc:28063]                                                  |
| 3988 | ENSG00000166091 | 54.12483033 | 2.048389743  | 0.408376695 | 2.48E-06 | CMTM5         | CKLF-like MARVEL transmembrane domain containing 5 [Source:HGNC Symbol;Acc:19176]                       |
| 3989 | ENSG00000108179 | 1789.086344 | 0.436177041  | 0.086988075 | 2.50E-06 | PPIF          | peptidylprolyl isomerase F [Source:HGNC Symbol;Acc:9259]                                                |
| 3990 | ENSG00000197362 | 138.0659154 | 1.325134001  | 0.264322097 | 2.51E-06 | ZNF786        | zinc finger protein 786 [Source:HGNC Symbol;Acc:21806]                                                  |
| 3991 | ENSG00000044115 | 1672.161013 | -0.463575241 | 0.092480584 | 2.52E-06 | CTNNA1        | catenin (cadherin-associated protein), alpha 1, 102kDa [Source:HGNC Symbol;Acc:2509]                    |
| 3992 | ENSG00000144668 | 239.4975365 | -1.368005858 | 0.272965565 | 2.53E-06 | ITGA9         | integrin, alpha 9 [Source:HGNC Symbol;Acc:6145]                                                         |
| 3993 | ENSG00000133131 | 689.4776285 | -0.638767012 | 0.127472568 | 2.54E-06 | MORC4         | MORC family CW-type zinc finger 4 [Source:HGNC Symbol;Acc:23485]                                        |
| 3994 | ENSG00000118217 | 1372.455153 | 0.475847101  | 0.094963799 | 2.54E-06 | ATF6          | activating transcription factor 6 [Source:HGNC Symbol;Acc:791]                                          |
| 3995 | ENSG00000095564 | 2657.138733 | 0.363575664  | 0.072564921 | 2.55E-06 | BTA1          | BTA1 RNA polymerase II, B-TFIID transcription factor-associated, 170kDa [Source:HGNC Symbol;Acc:17307]  |
| 3996 | ENSG00000106211 | 231.9701993 | 1.129509811  | 0.225456884 | 2.55E-06 | HSPB1         | heat shock 27kDa protein 1 [Source:HGNC Symbol;Acc:5246]                                                |
| 3997 | ENSG00000213297 | 92.31167581 | 1.634164288  | 0.326258309 | 2.56E-06 | ZNF625-ZNF20  | ZNF625-ZNF20 readthrough (NMD candidate) [Source:HGNC Symbol;Acc:48368]                                 |
| 3998 | ENSG00000177144 | 20.98621184 | 2.720077472  | 0.543171762 | 2.58E-06 | NUDT4P1       | nudix (nucleoside diphosphate linked moiety X)-type motif 4 pseudogene 1 [Source:HGNC Symbol;Acc:18012] |

|      |                 |             |              |             |          |               |                                                                                                                             |
|------|-----------------|-------------|--------------|-------------|----------|---------------|-----------------------------------------------------------------------------------------------------------------------------|
| 3999 | ENSG00000119977 | 244.6154763 | 1.034499656  | 0.20658073  | 2.58E-06 | TCTN3         | tectonic family member 3 [Source:HGNC Symbol;Acc:24519]                                                                     |
| 4000 | ENSG00000103335 | 1447.292331 | 0.717357026  | 0.143283135 | 2.59E-06 | PIEZO1        | piezo-type mechanosensitive ion channel component 1 [Source:HGNC Symbol;Acc:28993]                                          |
| 4001 | ENSG00000122674 | 1381.0516   | -0.560892153 | 0.112066459 | 2.61E-06 | CCZ1          | CCZ1 vacuolar protein trafficking and biogenesis associated homolog ( <i>S. cerevisiae</i> ) [Source:HGNC Symbol;Acc:21691] |
| 4002 | ENSG00000141965 | 523.6024588 | 0.732077303  | 0.146274973 | 2.61E-06 | FEM1A         | fem-1 homolog a ( <i>C. elegans</i> ) [Source:HGNC Symbol;Acc:16934]                                                        |
| 4003 | ENSG00000169231 | 1077.609559 | -0.510862579 | 0.102104266 | 2.63E-06 | THBS3         | thrombospondin 3 [Source:HGNC Symbol;Acc:11787]                                                                             |
| 4004 | ENSG00000004700 | 1233.983578 | 0.545876517  | 0.109139541 | 2.66E-06 | RECQL         | RecQ protein-like (DNA helicase Q1-like) [Source:HGNC Symbol;Acc:9948]                                                      |
| 4005 | ENSG00000120705 | 1728.81312  | -0.526368135 | 0.105283098 | 2.69E-06 | ETF1          | eukaryotic translation termination factor 1 [Source:HGNC Symbol;Acc:3477]                                                   |
| 4006 | ENSG00000138670 | 109.7606958 | 1.705236168  | 0.341126191 | 2.69E-06 | RASGEF1B      | RasGEF domain family, member 1B [Source:HGNC Symbol;Acc:24881]                                                              |
| 4007 | ENSG00000010361 | 254.1298285 | 1.102936324  | 0.220714011 | 2.72E-06 | FUZ           | fuzzy planar cell polarity protein [Source:HGNC Symbol;Acc:26219]                                                           |
| 4008 | ENSG00000119522 | 761.6331292 | -0.78114008  | 0.156430285 | 2.77E-06 | DENND1A       | DENN/MADD domain containing 1A [Source:HGNC Symbol;Acc:29324]                                                               |
| 4009 | ENSG00000154319 | 43.14713845 | 2.216503881  | 0.444019577 | 2.79E-06 | FAM167A       | family with sequence similarity 167, member A [Source:HGNC Symbol;Acc:15549]                                                |
| 4010 | ENSG00000136011 | 97.03870185 | -1.703070395 | 0.341178775 | 2.79E-06 | STAB2         | stabilin 2 [Source:HGNC Symbol;Acc:18629]                                                                                   |
| 4011 | ENSG00000260319 | 62.20367898 | -1.888439979 | 0.378539074 | 2.84E-06 | SPATC1        | spermatogenesis and centriole associated 1 [Source:HGNC Symbol;Acc:30510]                                                   |
| 4012 | ENSG00000239836 | 246.9777131 | 1.018943318  | 0.20429934  | 2.85E-06 | PSMB9         | proteasome (prosome, macropain) subunit, beta type, 9 [Source:HGNC Symbol;Acc:9546]                                         |
| 4013 | ENSG00000121281 | 5734.300321 | -0.289007077 | 0.057946332 | 2.85E-06 | ADCY7         | adenylate cyclase 7 [Source:HGNC Symbol;Acc:238]                                                                            |
| 4014 | ENSG00000148288 | 174.4068575 | -1.150135311 | 0.230713764 | 2.89E-06 | GBGT1         | globoside alpha-1,3-N-acetylgalactosaminyltransferase 1 [Source:HGNC Symbol;Acc:20460]                                      |
| 4015 | ENSG00000147536 | 159.0293213 | -1.239057498 | 0.248567912 | 2.89E-06 | GIN5A         | GIN5 complex subunit 4 (Sid5 homolog) [Source:HGNC Symbol;Acc:28226]                                                        |
| 4016 | ENSG00000171817 | 87.76705452 | 1.658466569  | 0.332733232 | 2.90E-06 | ZNF540        | zinc finger protein 540 [Source:HGNC Symbol;Acc:25331]                                                                      |
| 4017 | ENSG00000266302 | 181.7119022 | -1.348533044 | 0.270667045 | 2.93E-06 | RP11-219A15.1 | Coiled-coil domain-containing protein 144A [Source:UniProtKB/TrEMBL;Acc:C9JT67]                                             |
| 4018 | ENSG00000147475 | 828.1442767 | -0.595209027 | 0.119468766 | 2.93E-06 | ERLIN2        | ER lipid raft associated 2 [Source:HGNC Symbol;Acc:1356]                                                                    |
| 4019 | ENSG00000165630 | 575.8105261 | -0.663469376 | 0.133214285 | 2.95E-06 | PRPF18        | pre-mRNA processing factor 18 [Source:HGNC Symbol;Acc:17351]                                                                |
| 4020 | ENSG00000068654 | 574.3740426 | 0.819944529  | 0.164667288 | 2.97E-06 | POLR1A        | polymerase (RNA) I polypeptide A, 194kDa [Source:HGNC Symbol;Acc:17264]                                                     |
| 4021 | ENSG00000125648 | 136.3040194 | 1.590001087  | 0.319391561 | 2.99E-06 | SLC25A23      | solute carrier family 25 (mitochondrial carrier; phosphate carrier), member 23 [Source:HGNC Symbol;Acc:19375]               |
| 4022 | ENSG00000078687 | 1273.763858 | 0.469789109  | 0.094376105 | 2.99E-06 | TNRC6C        | trinucleotide repeat containing 6C [Source:HGNC Symbol;Acc:29318]                                                           |
| 4023 | ENSG00000128438 | 52.31576271 | 2.026868245  | 0.40734129  | 3.02E-06 | TBC1D27       | TBC1 domain family, member 27 [Source:HGNC Symbol;Acc:28104]                                                                |
| 4024 | ENSG00000211746 | 45.5942984  | 2.157264289  | 0.433563737 | 3.02E-06 | TRBV19        | T cell receptor beta variable 19 [Source:HGNC Symbol;Acc:12194]                                                             |
| 4025 | ENSG00000115170 | 119.5473185 | 1.550398523  | 0.311651573 | 3.04E-06 | ACVR1         | activin A receptor, type I [Source:HGNC Symbol;Acc:171]                                                                     |
| 4026 | ENSG00000135317 | 1567.033346 | -0.498332088 | 0.100182895 | 3.05E-06 | SNX14         | sorting nexin 14 [Source:HGNC Symbol;Acc:14977]                                                                             |

|      |                 |             |              |             |          |          |                                                                                                                    |
|------|-----------------|-------------|--------------|-------------|----------|----------|--------------------------------------------------------------------------------------------------------------------|
| 4027 | ENSG00000136531 | 12.22701026 | 2.807129159  | 0.564454399 | 3.06E-06 | SCN2A    | sodium channel, voltage-gated, type II, alpha subunit [Source:HGNC Symbol;Acc:10588]                               |
| 4028 | ENSG00000133059 | 1076.565759 | -0.518506176 | 0.10430429  | 3.09E-06 | DSTYK    | dual serine/threonine and tyrosine protein kinase [Source:HGNC Symbol;Acc:29043]                                   |
| 4029 | ENSG00000136048 | 761.8392311 | -0.688384569 | 0.138480114 | 3.09E-06 | DRAM1    | DNA-damage regulated autophagy modulator 1 [Source:HGNC Symbol;Acc:25645]                                          |
| 4030 | ENSG00000186583 | 62.0643797  | -1.886693822 | 0.379600104 | 3.11E-06 | SPATC1   | spermatogenesis and centriole associated 1 [Source:HGNC Symbol;Acc:30510]                                          |
| 4031 | ENSG00000189152 | 78.18268855 | 1.728236949  | 0.347760491 | 3.11E-06 | GRAPL    | GRB2-related adaptor protein-like [Source:HGNC Symbol;Acc:37240]                                                   |
| 4032 | ENSG00000126456 | 2249.808016 | 0.419947532  | 0.084506088 | 3.12E-06 | IRF3     | interferon regulatory factor 3 [Source:HGNC Symbol;Acc:6118]                                                       |
| 4033 | ENSG00000063322 | 846.3079155 | 0.622470723  | 0.125272045 | 3.12E-06 | MED29    | mediator complex subunit 29 [Source:HGNC Symbol;Acc:23074]                                                         |
| 4034 | ENSG00000100445 | 425.5504503 | 0.832881631  | 0.167678084 | 3.15E-06 | SDR39U1  | short chain dehydrogenase/reductase family 39U, member 1 [Source:HGNC Symbol;Acc:20275]                            |
| 4035 | ENSG00000148925 | 787.7426413 | -0.584676425 | 0.117715204 | 3.16E-06 | BTBD10   | BTB (POZ) domain containing 10 [Source:HGNC Symbol;Acc:21445]                                                      |
| 4036 | ENSG00000163235 | 322.2512736 | -0.892146754 | 0.179628456 | 3.16E-06 | TGFA     | transforming growth factor, alpha [Source:HGNC Symbol;Acc:11765]                                                   |
| 4037 | ENSG00000198727 | 61165.10207 | 0.258689666  | 0.052118796 | 3.21E-06 | MT-CYB   | mitochondrially encoded cytochrome b [Source:HGNC Symbol;Acc:7427]                                                 |
| 4038 | ENSG00000051523 | 6839.44898  | -0.386396987 | 0.077867327 | 3.23E-06 | CYBA     | cytochrome b-245, alpha polypeptide [Source:HGNC Symbol;Acc:2577]                                                  |
| 4039 | ENSG00000272517 | 321.7257126 | -0.890849594 | 0.179540899 | 3.24E-06 | TGFA     | transforming growth factor, alpha [Source:HGNC Symbol;Acc:11765]                                                   |
| 4040 | ENSG00000188305 | 330.1883688 | -0.947168008 | 0.190948472 | 3.26E-06 | C19orf35 | chromosome 19 open reading frame 35 [Source:HGNC Symbol;Acc:24793]                                                 |
| 4041 | ENSG00000262295 | 300.6728456 | 1.060325399  | 0.213773793 | 3.26E-06 | SBDSP1   | Shwachman-Bodian-Diamond syndrome pseudogene 1 [Source:HGNC Symbol;Acc:21646]                                      |
| 4042 | ENSG00000196205 | 322.3574006 | 0.940713972  | 0.189685492 | 3.27E-06 | EEF1A1P5 | eukaryotic translation elongation factor 1 alpha 1 pseudogene 5 [Source:HGNC Symbol;Acc:3200]                      |
| 4043 | ENSG00000243594 | 246.8885313 | 1.011735293  | 0.204071466 | 3.30E-06 | PSMB9    | proteasome (prosome, macropain) subunit, beta type, 9 [Source:HGNC Symbol;Acc:9546]                                |
| 4044 | ENSG00000077420 | 5390.593235 | -0.298845719 | 0.060278906 | 3.30E-06 | APBB1IP  | amyloid beta (A4) precursor protein-binding, family B, member 1 interacting protein [Source:HGNC Symbol;Acc:17379] |
| 4045 | ENSG00000176087 | 979.8231096 | 0.522612465  | 0.105456598 | 3.33E-06 | SLC35A4  | solute carrier family 35, member A4 [Source:HGNC Symbol;Acc:20753]                                                 |
| 4046 | ENSG00000165312 | 781.0947433 | 0.605071865  | 0.122181125 | 3.39E-06 | OTUD1    | OTU domain containing 1 [Source:HGNC Symbol;Acc:27346]                                                             |
| 4047 | ENSG00000197050 | 172.5726402 | 1.375589041  | 0.277854895 | 3.42E-06 | ZNF420   | zinc finger protein 420 [Source:HGNC Symbol;Acc:20649]                                                             |
| 4048 | ENSG00000128923 | 973.1003203 | -0.557071642 | 0.112537994 | 3.43E-06 | FAM63B   | family with sequence similarity 63, member B [Source:HGNC Symbol;Acc:26954]                                        |
| 4049 | ENSG00000198585 | 955.0397534 | 0.569731496  | 0.115207485 | 3.51E-06 | NUDT16   | nudix (nucleoside diphosphate linked moiety X)-type motif 16 [Source:HGNC Symbol;Acc:26442]                        |
| 4050 | ENSG00000116701 | 25658.62487 | -0.250978058 | 0.050753036 | 3.52E-06 | NCF2     | neutrophil cytosolic factor 2 [Source:HGNC Symbol;Acc:7661]                                                        |
| 4051 | ENSG00000113407 | 910.0930389 | -0.61588716  | 0.124557614 | 3.52E-06 | TARS     | threonyl-tRNA synthetase [Source:HGNC Symbol;Acc:11572]                                                            |
| 4052 | ENSG00000213585 | 1029.665546 | 0.541089732  | 0.109467471 | 3.55E-06 | VDAC1    | voltage-dependent anion channel 1 [Source:HGNC Symbol;Acc:12669]                                                   |
| 4053 | ENSG00000140287 | 1100.119996 | -0.509904382 | 0.10318486  | 3.58E-06 | HDC      | histidine decarboxylase [Source:HGNC Symbol;Acc:4855]                                                              |
| 4054 | ENSG00000105662 | 328.4782705 | 1.046532515  | 0.211794789 | 3.58E-06 | CRTC1    | CREB regulated transcription coactivator 1 [Source:HGNC Symbol;Acc:16062]                                          |

|      |                 |             |              |             |          |           |                                                                                                                          |
|------|-----------------|-------------|--------------|-------------|----------|-----------|--------------------------------------------------------------------------------------------------------------------------|
| 4055 | ENSG00000105887 | 5880.120516 | 0.307925929  | 0.062322366 | 3.59E-06 | MTPN      | myotrophin [Source:HGNC Symbol;Acc:15667]                                                                                |
| 4056 | ENSG00000055147 | 488.7350182 | -0.75611417  | 0.153061132 | 3.61E-06 | FAM114A2  | family with sequence similarity 114, member A2 [Source:HGNC Symbol;Acc:1333]                                             |
| 4057 | ENSG00000167302 | 1694.378381 | 0.539829289  | 0.109279441 | 3.61E-06 | ENTHD2    | ENTH domain containing 2 [Source:HGNC Symbol;Acc:26458]                                                                  |
| 4058 | ENSG00000115875 | 2956.36285  | 0.35301997   | 0.071476883 | 3.62E-06 | SRSF7     | serine/arginine-rich splicing factor 7 [Source:HGNC Symbol;Acc:10789]                                                    |
| 4059 | ENSG00000078399 | 23.97478903 | -2.544118681 | 0.515283617 | 3.65E-06 | HOXA9     | homeobox A9 [Source:HGNC Symbol;Acc:5109]                                                                                |
| 4060 | ENSG00000099917 | 2215.322859 | 0.499059891  | 0.101090126 | 3.66E-06 | MED15     | mediator complex subunit 15 [Source:HGNC Symbol;Acc:14248]                                                               |
| 4061 | ENSG00000105701 | 4884.957733 | 1.040545775  | 0.210779817 | 3.66E-06 | FKBP8     | FK506 binding protein 8, 38kDa [Source:HGNC Symbol;Acc:3724]                                                             |
| 4062 | ENSG00000205246 | 232.8119341 | 1.040672688  | 0.210818352 | 3.67E-06 | RPSAP58   | ribosomal protein SA pseudogene 58 [Source:HGNC Symbol;Acc:36809]                                                        |
| 4063 | ENSG00000067992 | 613.9075652 | -0.679107587 | 0.137578124 | 3.67E-06 | PKD3      | pyruvate dehydrogenase kinase, isozyme 3 [Source:HGNC Symbol;Acc:8811]                                                   |
| 4064 | ENSG00000173530 | 416.0015929 | -0.758920409 | 0.153765465 | 3.68E-06 | TNFRSF10D | tumor necrosis factor receptor superfamily, member 10d, decoy with truncated death domain [Source:HGNC Symbol;Acc:11907] |
| 4065 | ENSG00000185947 | 866.3748234 | 0.589669822  | 0.119487003 | 3.69E-06 | ZNF267    | zinc finger protein 267 [Source:HGNC Symbol;Acc:13060]                                                                   |
| 4066 | ENSG00000108406 | 852.1465485 | 0.589812799  | 0.119531664 | 3.70E-06 | DHX40     | DEAH (Asp-Glu-Ala-His) box polypeptide 40 [Source:HGNC Symbol;Acc:18018]                                                 |
| 4067 | ENSG00000130766 | 735.9048545 | -0.615261561 | 0.124700571 | 3.71E-06 | SESN2     | sestrin 2 [Source:HGNC Symbol;Acc:20746]                                                                                 |
| 4068 | ENSG00000071794 | 409.5015337 | -0.803037189 | 0.162774869 | 3.72E-06 | HLTF      | helicase-like transcription factor [Source:HGNC Symbol;Acc:11099]                                                        |
| 4069 | ENSG00000153162 | 38.52136383 | 2.279644772  | 0.462185661 | 3.74E-06 | BMP6      | bone morphogenetic protein 6 [Source:HGNC Symbol;Acc:1073]                                                               |
| 4070 | ENSG00000146021 | 196.5750878 | 1.109238456  | 0.225045913 | 3.80E-06 | KLHL3     | kelch-like family member 3 [Source:HGNC Symbol;Acc:6354]                                                                 |
| 4071 | ENSG00000131437 | 192.0326234 | 1.432898133  | 0.290723051 | 3.80E-06 | KIF3A     | kinesin family member 3A [Source:HGNC Symbol;Acc:6319]                                                                   |
| 4072 | ENSG00000167604 | 944.2298536 | -0.573073489 | 0.11629461  | 3.82E-06 | NFKBID    | nuclear factor of kappa light polypeptide gene enhancer in B-cells inhibitor, delta [Source:HGNC Symbol;Acc:15671]       |
| 4073 | ENSG00000023892 | 4342.568469 | -0.314630882 | 0.063892834 | 3.89E-06 | DEF6      | differentially expressed in FDCP 6 homolog (mouse) [Source:HGNC Symbol;Acc:2760]                                         |
| 4074 | ENSG00000160712 | 6949.976253 | -0.292839415 | 0.059488005 | 3.92E-06 | IL6R      | interleukin 6 receptor [Source:HGNC Symbol;Acc:6019]                                                                     |
| 4075 | ENSG00000117597 | 314.8024549 | 0.885957867  | 0.180277395 | 4.09E-06 | DIEXF     | digestive organ expansion factor homolog (zebrafish) [Source:HGNC Symbol;Acc:28440]                                      |
| 4076 | ENSG00000124772 | 111.1698364 | 1.515307448  | 0.308507373 | 4.14E-06 | CPNE5     | copine V [Source:HGNC Symbol;Acc:2318]                                                                                   |
| 4077 | ENSG00000173614 | 460.3346245 | -0.783576781 | 0.159552142 | 4.16E-06 | NMNAT1    | nicotinamide nucleotide adenyltransferase 1 [Source:HGNC Symbol;Acc:17877]                                               |
| 4078 | ENSG00000101842 | 116.1086932 | 1.626740093  | 0.331288749 | 4.17E-06 | VSIG1     | V-set and immunoglobulin domain containing 1 [Source:HGNC Symbol;Acc:28675]                                              |
| 4079 | ENSG00000235602 | 126.4523295 | -1.362243459 | 0.277436869 | 4.18E-06 | POU5F1P3  | POU class 5 homeobox 1 pseudogene 3 [Source:HGNC Symbol;Acc:9222]                                                        |
| 4080 | ENSG00000146556 | 979.6281007 | -0.679662967 | 0.138453763 | 4.20E-06 | WASH2P    | WAS protein family homolog 2 pseudogene [Source:HGNC Symbol;Acc:33145]                                                   |
| 4081 | ENSG00000013523 | 313.3930664 | 0.921896032  | 0.187805991 | 4.20E-06 | ANGEL1    | angel homolog 1 (Drosophila) [Source:HGNC Symbol;Acc:19961]                                                              |
| 4082 | ENSG00000130429 | 7226.512133 | -0.272721158 | 0.055566852 | 4.22E-06 | ARPC1B    | actin related protein 2/3 complex, subunit 1B, 41kDa [Source:HGNC Symbol;Acc:704]                                        |



|      |                 |             |              |             |          |          |                                                                                          |
|------|-----------------|-------------|--------------|-------------|----------|----------|------------------------------------------------------------------------------------------|
| 4083 | ENSG00000198315 | 1086.660701 | 0.551924724  | 0.112458772 | 4.22E-06 | ZKSCAN8  | zinc finger with KRAB and SCAN domains 8 [Source:HGNC Symbol;Acc:12983]                  |
| 4084 | ENSG00000164300 | 288.3566357 | 0.922818648  | 0.188145146 | 4.28E-06 | SERINC5  | serine incorporator 5 [Source:HGNC Symbol;Acc:18825]                                     |
| 4085 | ENSG00000135953 | 365.5750513 | -0.861834442 | 0.175752833 | 4.31E-06 | MFSD9    | major facilitator superfamily domain containing 9 [Source:HGNC Symbol;Acc:28158]         |
| 4086 | ENSG00000165891 | 60.65153637 | -1.913329551 | 0.390241154 | 4.32E-06 | E2F7     | E2F transcription factor 7 [Source:HGNC Symbol;Acc:23820]                                |
| 4087 | ENSG00000121211 | 58.45551896 | -1.804406255 | 0.368051004 | 4.33E-06 | MND1     | meiotic nuclear divisions 1 homolog (S. cerevisiae) [Source:HGNC Symbol;Acc:24839]       |
| 4088 | ENSG00000204525 | 281.7576254 | 1.112600787  | 0.22702977  | 4.37E-06 | HLA-C    | major histocompatibility complex, class I, C [Source:HGNC Symbol;Acc:4933]               |
| 4089 | ENSG00000105176 | 854.9632305 | 0.596869918  | 0.121884686 | 4.45E-06 | URI1     | URI1, prefoldin-like chaperone [Source:HGNC Symbol;Acc:13236]                            |
| 4090 | ENSG00000223865 | 48.80048925 | 2.149841467  | 0.439030889 | 4.46E-06 | HLA-DPB1 | major histocompatibility complex, class II, DP beta 1 [Source:HGNC Symbol;Acc:4940]      |
| 4091 | ENSG00000168646 | 71.24048614 | 1.895682605  | 0.387193261 | 4.48E-06 | AXIN2    | axin 2 [Source:HGNC Symbol;Acc:904]                                                      |
| 4092 | ENSG00000196704 | 537.0767787 | 0.69850468   | 0.142744737 | 4.53E-06 | AMZ2     | archaelysin family metallopeptidase 2 [Source:HGNC Symbol;Acc:28041]                     |
| 4093 | ENSG00000267206 | 52.34539446 | 2.10117057   | 0.429425224 | 4.54E-06 | LCN6     | lipocalin 6 [Source:HGNC Symbol;Acc:17337]                                               |
| 4094 | ENSG00000100285 | 65.30007874 | -1.745439575 | 0.356752609 | 4.55E-06 | NEFH     | neurofilament, heavy polypeptide [Source:HGNC Symbol;Acc:7737]                           |
| 4095 | ENSG00000243067 | 243.2739628 | 1.007577996  | 0.205983957 | 4.57E-06 | PSMB9    | proteasome (prosome, macropain) subunit, beta type, 9 [Source:HGNC Symbol;Acc:9546]      |
| 4096 | ENSG00000163810 | 48.13052251 | -1.981083473 | 0.405028943 | 4.58E-06 | TGM4     | transglutaminase 4 [Source:HGNC Symbol;Acc:11780]                                        |
| 4097 | ENSG00000132297 | 1283.339424 | 0.470586605  | 0.096210888 | 4.58E-06 | HHLA1    | HERV-H LTR-associating 1 [Source:HGNC Symbol;Acc:4904]                                   |
| 4098 | ENSG00000226173 | 277.8595726 | 1.136210093  | 0.232300369 | 4.58E-06 | TAP1     | transporter 1, ATP-binding cassette, sub-family B (MDR/TAP) [Source:HGNC Symbol;Acc:43]  |
| 4099 | ENSG00000240118 | 237.7550349 | 1.016110539  | 0.207753398 | 4.58E-06 | PSMB9    | proteasome (prosome, macropain) subunit, beta type, 9 [Source:HGNC Symbol;Acc:9546]      |
| 4100 | ENSG00000206297 | 277.8265403 | 1.135418966  | 0.232168701 | 4.59E-06 | TAP1     | transporter 1, ATP-binding cassette, sub-family B (MDR/TAP) [Source:HGNC Symbol;Acc:43]  |
| 4101 | ENSG00000099968 | 1006.736549 | -0.548824616 | 0.112228229 | 4.60E-06 | BCL2L13  | BCL2-like 13 (apoptosis facilitator) [Source:HGNC Symbol;Acc:17164]                      |
| 4102 | ENSG00000262747 | 537.0642271 | 0.698096367  | 0.142774994 | 4.61E-06 | AMZ2     | archaelysin family metallopeptidase 2 [Source:HGNC Symbol;Acc:28041]                     |
| 4103 | ENSG00000115020 | 3055.149611 | -0.364667297 | 0.074589253 | 4.62E-06 | PIKFYVE  | phosphoinositide kinase, FYVE finger containing [Source:HGNC Symbol;Acc:23785]           |
| 4104 | ENSG00000104369 | 17.2814848  | 2.735106343  | 0.559467903 | 4.63E-06 | JPH1     | junctophilin 1 [Source:HGNC Symbol;Acc:14201]                                            |
| 4105 | ENSG00000188312 | 119.1457494 | -1.360927462 | 0.278410583 | 4.64E-06 | CENPP    | centromere protein P [Source:HGNC Symbol;Acc:32933]                                      |
| 4106 | ENSG00000132549 | 1974.74846  | -0.49007686  | 0.10029085  | 4.68E-06 | VPS13B   | vacuolar protein sorting 13 homolog B (yeast) [Source:HGNC Symbol;Acc:2183]              |
| 4107 | ENSG00000173210 | 42.95671462 | 2.204309191  | 0.451101235 | 4.68E-06 | ABLIM3   | actin binding LIM protein family, member 3 [Source:HGNC Symbol;Acc:29132]                |
| 4108 | ENSG00000173692 | 1172.189796 | -0.651797102 | 0.133389198 | 4.68E-06 | PSMD1    | proteasome (prosome, macropain) 26S subunit, non-ATPase, 1 [Source:HGNC Symbol;Acc:9554] |
| 4109 | ENSG00000152953 | 52.85302929 | 2.014199893  | 0.412418025 | 4.74E-06 | STK32B   | serine/threonine kinase 32B [Source:HGNC Symbol;Acc:14217]                               |
| 4110 | ENSG00000134765 | 28.27214598 | 2.525010739  | 0.517060925 | 4.75E-06 | DSC1     | desmocollin 1 [Source:HGNC Symbol;Acc:3035]                                              |

|      |                 |             |              |             |          |          |                                                                                                                 |
|------|-----------------|-------------|--------------|-------------|----------|----------|-----------------------------------------------------------------------------------------------------------------|
| 4111 | ENSG00000147576 | 211.6127699 | 1.093282079  | 0.223897742 | 4.76E-06 | ADHFE1   | alcohol dehydrogenase, iron containing, 1 [Source:HGNC Symbol;Acc:16354]                                        |
| 4112 | ENSG00000112561 | 1414.396935 | 0.585664101  | 0.1199514   | 4.77E-06 | TFEB     | transcription factor EB [Source:HGNC Symbol;Acc:11753]                                                          |
| 4113 | ENSG00000100298 | 122.5895559 | -1.388895855 | 0.284571882 | 4.81E-06 | APOBEC3H | apolipoprotein B mRNA editing enzyme, catalytic polypeptide-like 3H [Source:HGNC Symbol;Acc:24100]              |
| 4114 | ENSG00000016391 | 152.9125222 | -1.297274399 | 0.265936705 | 4.87E-06 | CHDH     | choline dehydrogenase [Source:HGNC Symbol;Acc:24288]                                                            |
| 4115 | ENSG00000156411 | 1703.516483 | -0.447338275 | 0.091713749 | 4.88E-06 | C14orf2  | chromosome 14 open reading frame 2 [Source:HGNC Symbol;Acc:1188]                                                |
| 4116 | ENSG00000240065 | 242.6668998 | 1.006635016  | 0.206434465 | 4.91E-06 | PSMB9    | proteasome (prosome, macropain) subunit, beta type, 9 [Source:HGNC Symbol;Acc:9546]                             |
| 4117 | ENSG00000197780 | 303.0795189 | -0.880854948 | 0.180651325 | 4.92E-06 | TAF13    | TAF13 RNA polymerase II, TATA box binding protein (TBP)-associated factor, 18kDa [Source:HGNC Symbol;Acc:11546] |
| 4118 | ENSG00000132670 | 1564.554625 | 0.437475231  | 0.089724344 | 4.93E-06 | PTPRA    | protein tyrosine phosphatase, receptor type, A [Source:HGNC Symbol;Acc:9664]                                    |
| 4119 | ENSG00000118680 | 7720.945243 | -0.277203471 | 0.056864982 | 4.95E-06 | MYL12B   | myosin, light chain 12B, regulatory [Source:HGNC Symbol;Acc:29827]                                              |
| 4120 | ENSG00000102898 | 670.8729488 | 0.624528141  | 0.12812629  | 4.96E-06 | NUTF2    | nuclear transport factor 2 [Source:HGNC Symbol;Acc:13722]                                                       |
| 4121 | ENSG00000175445 | 105.6441539 | -1.459011932 | 0.299369794 | 4.98E-06 | LPL      | lipoprotein lipase [Source:HGNC Symbol;Acc:6677]                                                                |
| 4122 | ENSG00000160710 | 15743.67234 | -0.250931212 | 0.05149022  | 4.98E-06 | ADAR     | adenosine deaminase, RNA-specific [Source:HGNC Symbol;Acc:225]                                                  |
| 4123 | ENSG00000166913 | 10457.25133 | -0.28660062  | 0.058821731 | 5.01E-06 | YWHAH    | tyrosine 3-monooxygenase/tryptophan 5-monooxygenase activation protein, beta [Source:HGNC Symbol;Acc:12849]     |
| 4124 | ENSG00000011198 | 1394.622477 | -0.44388801  | 0.091123262 | 5.03E-06 | ABHD5    | abhydrolase domain containing 5 [Source:HGNC Symbol;Acc:21396]                                                  |
| 4125 | ENSG00000170892 | 106.2216655 | 1.481254034  | 0.304145685 | 5.06E-06 | TSEN34   | TSEN34 tRNA splicing endonuclease subunit [Source:HGNC Symbol;Acc:15506]                                        |
| 4126 | ENSG00000272739 | 106.2216157 | 1.481244816  | 0.304145827 | 5.06E-06 | TSEN34   | TSEN34 tRNA splicing endonuclease subunit [Source:HGNC Symbol;Acc:15506]                                        |
| 4127 | ENSG00000273053 | 106.2215489 | 1.481242243  | 0.304145836 | 5.06E-06 | TSEN34   | TSEN34 tRNA splicing endonuclease subunit [Source:HGNC Symbol;Acc:15506]                                        |
| 4128 | ENSG00000272561 | 106.2214465 | 1.481232624  | 0.304145878 | 5.06E-06 | TSEN34   | TSEN34 tRNA splicing endonuclease subunit [Source:HGNC Symbol;Acc:15506]                                        |
| 4129 | ENSG00000272705 | 106.2212962 | 1.481225344  | 0.304146656 | 5.06E-06 | TSEN34   | TSEN34 tRNA splicing endonuclease subunit [Source:HGNC Symbol;Acc:15506]                                        |
| 4130 | ENSG00000273490 | 106.2213146 | 1.481215588  | 0.304147471 | 5.06E-06 | TSEN34   | TSEN34 tRNA splicing endonuclease subunit [Source:HGNC Symbol;Acc:15506]                                        |
| 4131 | ENSG00000273235 | 106.2211988 | 1.481204835  | 0.304147977 | 5.06E-06 | TSEN34   | TSEN34 tRNA splicing endonuclease subunit [Source:HGNC Symbol;Acc:15506]                                        |
| 4132 | ENSG00000100934 | 899.4385212 | -0.537940618 | 0.110504441 | 5.10E-06 | SEC23A   | Sec23 homolog A (S. cerevisiae) [Source:HGNC Symbol;Acc:10701]                                                  |
| 4133 | ENSG00000163171 | 5527.184279 | -0.315285467 | 0.064771525 | 5.11E-06 | CDC42EP3 | CDC42 effector protein (Rho GTPase binding) 3 [Source:HGNC Symbol;Acc:16943]                                    |
| 4134 | ENSG00000112079 | 7096.054621 | -0.26197002  | 0.053844707 | 5.17E-06 | STK38    | serine/threonine kinase 38 [Source:HGNC Symbol;Acc:17847]                                                       |
| 4135 | ENSG00000117592 | 1767.700237 | 0.404443436  | 0.083132825 | 5.18E-06 | PRDX6    | peroxiredoxin 6 [Source:HGNC Symbol;Acc:16753]                                                                  |
| 4136 | ENSG00000131381 | 770.5965689 | -0.588010399 | 0.120886246 | 5.20E-06 | ZFYVE20  | zinc finger, FYVE domain containing 20 [Source:HGNC Symbol;Acc:20759]                                           |
| 4137 | ENSG00000203760 | 105.692647  | -1.446056661 | 0.297364406 | 5.23E-06 | CENPW    | centromere protein W [Source:HGNC Symbol;Acc:21488]                                                             |
| 4138 | ENSG00000111676 | 176.7943021 | 1.177823876  | 0.242233843 | 5.25E-06 | ATN1     | atrophin 1 [Source:HGNC Symbol;Acc:3033]                                                                        |

|      |                 |             |              |             |          |               |                                                                                                                            |
|------|-----------------|-------------|--------------|-------------|----------|---------------|----------------------------------------------------------------------------------------------------------------------------|
| 4139 | ENSG00000138801 | 1231.841856 | 0.487080482  | 0.100181013 | 5.25E-06 | PAPSS1        | 3'-phosphoadenosine 5'-phosphosulfate synthase 1 [Source:HGNC Symbol;Acc:8603]                                             |
| 4140 | ENSG00000099999 | 197.1284153 | -1.058043998 | 0.217829288 | 5.38E-06 | RNF215        | ring finger protein 215 [Source:HGNC Symbol;Acc:33434]                                                                     |
| 4141 | ENSG00000124243 | 72.21382991 | 1.688253306  | 0.347602902 | 5.39E-06 | BCAS4         | breast carcinoma amplified sequence 4 [Source:HGNC Symbol;Acc:14367]                                                       |
| 4142 | ENSG00000104972 | 277.5813792 | 1.22185007   | 0.251629878 | 5.42E-06 | LILRB1        | leukocyte immunoglobulin-like receptor, subfamily B (with TM and ITIM domains), member 1 [Source:HGNC Symbol;Acc:6605]     |
| 4143 | ENSG00000104164 | 2028.429728 | -0.428647076 | 0.088278518 | 5.42E-06 | BLOC1S6       | biogenesis of lysosomal organelles complex-1, subunit 6, pallidin [Source:HGNC Symbol;Acc:8549]                            |
| 4144 | ENSG00000176915 | 2847.001876 | 0.393473916  | 0.081045818 | 5.44E-06 | ANKLE2        | ankyrin repeat and LEM domain containing 2 [Source:HGNC Symbol;Acc:29101]                                                  |
| 4145 | ENSG00000159348 | 787.3808071 | -0.563839577 | 0.116136922 | 5.44E-06 | CYB5R1        | cytochrome b5 reductase 1 [Source:HGNC Symbol;Acc:13397]                                                                   |
| 4146 | ENSG00000156873 | 1708.232894 | -0.430492158 | 0.088685647 | 5.46E-06 | PHKG2         | phosphorylase kinase, gamma 2 (testis) [Source:HGNC Symbol;Acc:8931]                                                       |
| 4147 | ENSG00000003756 | 9936.427985 | -0.273698724 | 0.056399132 | 5.49E-06 | RBM5          | RNA binding motif protein 5 [Source:HGNC Symbol;Acc:9902]                                                                  |
| 4148 | ENSG00000205565 | 182.4546977 | 1.341040908  | 0.276348946 | 5.49E-06 | RP11-497H16.6 |                                                                                                                            |
| 4149 | ENSG00000167548 | 6861.098043 | -0.294791688 | 0.060764265 | 5.53E-06 | KMT2D         | lysine (K)-specific methyltransferase 2D [Source:HGNC Symbol;Acc:7133]                                                     |
| 4150 | ENSG00000198520 | 1147.75944  | 0.645394649  | 0.133088223 | 5.58E-06 | C1orf228      | chromosome 1 open reading frame 228 [Source:HGNC Symbol;Acc:34345]                                                         |
| 4151 | ENSG00000073060 | 493.3665437 | 0.774086661  | 0.159629908 | 5.59E-06 | SCARB1        | scavenger receptor class B, member 1 [Source:HGNC Symbol;Acc:1664]                                                         |
| 4152 | ENSG00000109519 | 454.5050061 | -0.774821546 | 0.159847148 | 5.64E-06 | GRPEL1        | GrpE-like 1, mitochondrial (E. coli) [Source:HGNC Symbol;Acc:19696]                                                        |
| 4153 | ENSG00000140632 | 2529.741848 | -0.389022719 | 0.080293186 | 5.70E-06 | GLYR1         | glyoxylate reductase 1 homolog (Arabidopsis) [Source:HGNC Symbol;Acc:24434]                                                |
| 4154 | ENSG00000182473 | 3020.694237 | -0.376830268 | 0.077795871 | 5.74E-06 | EXOC7         | exocyst complex component 7 [Source:HGNC Symbol;Acc:23214]                                                                 |
| 4155 | ENSG00000151729 | 91.82861759 | 1.595450355  | 0.32945632  | 5.77E-06 | SLC25A4       | solute carrier family 25 (mitochondrial carrier; adenine nucleotide translocator), member 4 [Source:HGNC Symbol;Acc:10990] |
| 4156 | ENSG00000254901 | 902.5169292 | -0.537962637 | 0.111112016 | 5.80E-06 | MEF2BNB       | MEF2B neighbor [Source:HGNC Symbol;Acc:37247]                                                                              |
| 4157 | ENSG00000148219 | 447.9422286 | -0.736118257 | 0.15204358  | 5.80E-06 | ASTN2         | astrotactin 2 [Source:HGNC Symbol;Acc:17021]                                                                               |
| 4158 | ENSG00000156218 | 282.0230916 | -0.893738684 | 0.184604174 | 5.80E-06 | ADAMTSL3      | ADAMTS-like 3 [Source:HGNC Symbol;Acc:14633]                                                                               |
| 4159 | ENSG00000125871 | 834.2567406 | -0.554620109 | 0.114572664 | 5.82E-06 | MGME1         | mitochondrial genome maintenance exonuclease 1 [Source:HGNC Symbol;Acc:16205]                                              |
| 4160 | ENSG00000228492 | 668.6628073 | -0.640772675 | 0.132388195 | 5.84E-06 | RAB11FIP1P1   | RAB11 family interacting protein 1 (class I) pseudogene 1 [Source:HGNC Symbol;Acc:42366]                                   |
| 4161 | ENSG00000268872 | 177.3266092 | 1.175381514  | 0.242913732 | 5.88E-06 | ATN1          | atrophin 1 [Source:HGNC Symbol;Acc:3033]                                                                                   |
| 4162 | ENSG00000102781 | 261.8965999 | 1.056169864  | 0.218286044 | 5.88E-06 | KATNAL1       | katanin p60 subunit A-like 1 [Source:HGNC Symbol;Acc:28361]                                                                |
| 4163 | ENSG00000271383 | 2391.265867 | 0.402064028  | 0.083130171 | 5.94E-06 | AC242842.2    | NBPF [Source:UniProtKB/TrEMBL;Acc:Q3BBU2]                                                                                  |
| 4164 | ENSG00000211592 | 4415.939849 | -0.299276914 | 0.061881503 | 5.95E-06 | IGKC          | immunoglobulin kappa constant [Source:HGNC Symbol;Acc:5716]                                                                |
| 4165 | ENSG00000134352 | 1163.502333 | 1.233273354  | 0.255056907 | 5.97E-06 | IL6ST         | interleukin 6 signal transducer (gp130, oncostatin M receptor) [Source:HGNC Symbol;Acc:6021]                               |
| 4166 | ENSG00000073712 | 25.74932832 | 2.478702869  | 0.512812766 | 6.02E-06 | FERMT2        | fermitin family member 2 [Source:HGNC Symbol;Acc:15767]                                                                    |

|      |                 |             |              |             |          |          |                                                                                                                          |
|------|-----------------|-------------|--------------|-------------|----------|----------|--------------------------------------------------------------------------------------------------------------------------|
| 4167 | ENSG00000215298 | 1930.517894 | -0.430146104 | 0.089006129 | 6.05E-06 | FP15737  |                                                                                                                          |
| 4168 | ENSG00000086570 | 85.6076747  | -1.553448636 | 0.32145912  | 6.05E-06 | FAT2     | FAT atypical cadherin 2 [Source:HGNC Symbol;Acc:3596]                                                                    |
| 4169 | ENSG00000179598 | 186.0589599 | -1.08135999  | 0.223853239 | 6.11E-06 | PLD6     | phospholipase D family, member 6 [Source:HGNC Symbol;Acc:30447]                                                          |
| 4170 | ENSG00000005379 | 1027.248245 | 0.625236215  | 0.129473789 | 6.15E-06 | BZRAP1   | benzodiazepine receptor (peripheral) associated protein 1 [Source:HGNC Symbol;Acc:16831]                                 |
| 4171 | ENSG00000189337 | 527.8490219 | -0.696364723 | 0.144203119 | 6.15E-06 | KAZN     | kazrin, periplakin interacting protein [Source:HGNC Symbol;Acc:29173]                                                    |
| 4172 | ENSG00000167363 | 84.42416177 | -1.68598972  | 0.349252143 | 6.20E-06 | FN3K     | fructosamine 3 kinase [Source:HGNC Symbol;Acc:24822]                                                                     |
| 4173 | ENSG00000138813 | 62.51972017 | -1.7469376   | 0.362022103 | 6.26E-06 | C4orf17  | chromosome 4 open reading frame 17 [Source:HGNC Symbol;Acc:25274]                                                        |
| 4174 | ENSG00000130723 | 3858.399981 | 0.357506945  | 0.074100364 | 6.29E-06 | PRRC2B   | proline-rich coiled-coil 2B [Source:HGNC Symbol;Acc:28121]                                                               |
| 4175 | ENSG00000135390 | 2816.979407 | 0.335586685  | 0.069570363 | 6.32E-06 | ATP5G2   | ATP synthase, H <sup>+</sup> transporting, mitochondrial Fo complex, subunit C2 (subunit 9) [Source:HGNC Symbol;Acc:842] |
| 4176 | ENSG00000260227 | 38.20310685 | 2.223000626  | 0.460921685 | 6.34E-06 | TRBV5-1  | T cell receptor beta variable 5-1 [Source:HGNC Symbol;Acc:12218]                                                         |
| 4177 | ENSG00000120688 | 498.7961686 | -0.714203233 | 0.148146101 | 6.40E-06 | WBP4     | WW domain binding protein 4 [Source:HGNC Symbol;Acc:12739]                                                               |
| 4178 | ENSG00000170289 | 18.54417187 | -2.591252603 | 0.53751184  | 6.40E-06 | CNGB3    | cyclic nucleotide gated channel beta 3 [Source:HGNC Symbol;Acc:2153]                                                     |
| 4179 | ENSG00000167378 | 659.235424  | -0.618273708 | 0.12828233  | 6.44E-06 | IRGQ     | immunity-related GTPase family, Q [Source:HGNC Symbol;Acc:24868]                                                         |
| 4180 | ENSG00000212916 | 66.40983851 | 1.800573791  | 0.373619332 | 6.45E-06 | MAP10    | microtubule-associated protein 10 [Source:HGNC Symbol;Acc:29265]                                                         |
| 4181 | ENSG00000081721 | 237.1446439 | 1.001430936  | 0.207859914 | 6.50E-06 | DUSP12   | dual specificity phosphatase 12 [Source:HGNC Symbol;Acc:3067]                                                            |
| 4182 | ENSG00000124789 | 1899.735981 | 0.421985668  | 0.087663122 | 6.63E-06 | NUP153   | nucleoporin 153kDa [Source:HGNC Symbol;Acc:8062]                                                                         |
| 4183 | ENSG00000070501 | 726.621551  | 0.595610817  | 0.123770196 | 6.68E-06 | POLB     | polymerase (DNA directed), beta [Source:HGNC Symbol;Acc:9174]                                                            |
| 4184 | ENSG00000100304 | 528.3713712 | -0.721172355 | 0.149872806 | 6.69E-06 | TLL12    | tubulin tyrosine ligase-like family, member 12 [Source:HGNC Symbol;Acc:28974]                                            |
| 4185 | ENSG00000159231 | 55.23866025 | 1.86710622   | 0.388299654 | 6.80E-06 | CBR3     | carbonyl reductase 3 [Source:HGNC Symbol;Acc:1549]                                                                       |
| 4186 | ENSG00000184985 | 153.2197258 | -1.26039124  | 0.262171829 | 6.83E-06 | SORCS2   | sortilin-related VPS10 domain containing receptor 2 [Source:HGNC Symbol;Acc:16698]                                       |
| 4187 | ENSG00000196155 | 116.604898  | 1.562523671  | 0.325140778 | 6.89E-06 | PLEKHG4  | pleckstrin homology domain containing, family G (with RhoGef domain) member 4 [Source:HGNC Symbol;Acc:24501]             |
| 4188 | ENSG00000100403 | 952.3295339 | 0.558691146  | 0.116259379 | 6.90E-06 | ZC3H7B   | zinc finger CCCH-type containing 7B [Source:HGNC Symbol;Acc:30869]                                                       |
| 4189 | ENSG00000266028 | 885.5336034 | -0.806648877 | 0.167870954 | 6.91E-06 | SRGAP2   | SLIT-ROBO Rho GTPase activating protein 2 [Source:HGNC Symbol;Acc:19751]                                                 |
| 4190 | ENSG00000161013 | 1094.805137 | -0.580785542 | 0.120915967 | 6.97E-06 | MGAT4B   | mannosyl (alpha-1,3-)-glycoprotein beta-1,4-N-acetylglucosaminyltransferase, isozyme B [Source:HGNC Symbol;Acc:7048]     |
| 4191 | ENSG00000114302 | 1016.814339 | -0.51009789  | 0.106214288 | 7.00E-06 | PRKAR2A  | protein kinase, cAMP-dependent, regulatory, type II, alpha [Source:HGNC Symbol;Acc:9391]                                 |
| 4192 | ENSG00000211804 | 40.90727966 | 2.210772828  | 0.460398511 | 7.02E-06 | TRDV1    | T cell receptor delta variable 1 [Source:HGNC Symbol;Acc:12262]                                                          |
| 4193 | ENSG00000266777 | 212.9522686 | -1.075252593 | 0.223928016 | 7.02E-06 | SH3GL1P1 | SH3-domain GRB2-like 1 pseudogene 1 [Source:HGNC Symbol;Acc:10835]                                                       |
| 4194 | ENSG00000187713 | 383.6403809 | 0.782532994  | 0.162993817 | 7.04E-06 | TMEM203  | transmembrane protein 203 [Source:HGNC Symbol;Acc:28217]                                                                 |

|      |                 |             |              |             |          |            |                                                                                                    |
|------|-----------------|-------------|--------------|-------------|----------|------------|----------------------------------------------------------------------------------------------------|
| 4195 | ENSG00000109255 | 12.40677678 | -2.709964701 | 0.564500052 | 7.06E-06 | NMU        | neuromedin U [Source:HGNC Symbol;Acc:7859]                                                         |
| 4196 | ENSG00000188026 | 357.4505774 | -0.832620907 | 0.173510053 | 7.12E-06 | RILPL1     | Rab interacting lysosomal protein-like 1 [Source:HGNC Symbol;Acc:26814]                            |
| 4197 | ENSG00000160293 | 133.3298954 | 1.319422969  | 0.275040158 | 7.17E-06 | VAV2       | vav 2 guanine nucleotide exchange factor [Source:HGNC Symbol;Acc:12658]                            |
| 4198 | ENSG00000224501 | 16.10454272 | 2.676189926  | 0.557880311 | 7.18E-06 | HSPA1B     | heat shock 70kDa protein 1B [Source:HGNC Symbol;Acc:5233]                                          |
| 4199 | ENSG00000197165 | 179.2760595 | -1.086771373 | 0.226567367 | 7.19E-06 | SULT1A2    | sulfotransferase family, cytosolic, 1A, phenol-preferring, member 2 [Source:HGNC Symbol;Acc:11454] |
| 4200 | ENSG00000067334 | 1287.92959  | -0.462190444 | 0.096385683 | 7.24E-06 | DNTTIP2    | deoxynucleotidyltransferase, terminal, interacting protein 2 [Source:HGNC Symbol;Acc:24013]        |
| 4201 | ENSG00000131697 | 291.5497721 | -0.994602914 | 0.207476618 | 7.29E-06 | NPHP4      | nephronophthisis 4 [Source:HGNC Symbol;Acc:19104]                                                  |
| 4202 | ENSG00000143816 | 32.67648416 | 2.29539377   | 0.478917849 | 7.32E-06 | WNT9A      | wingless-type MMTV integration site family, member 9A [Source:HGNC Symbol;Acc:12778]               |
| 4203 | ENSG00000124882 | 92.44540015 | -1.481623165 | 0.309143416 | 7.33E-06 | EREG       | epiregulin [Source:HGNC Symbol;Acc:3443]                                                           |
| 4204 | ENSG00000198929 | 72.64512702 | -1.709064274 | 0.356781818 | 7.42E-06 | NOS1AP     | nitric oxide synthase 1 (neuronal) adaptor protein [Source:HGNC Symbol;Acc:16859]                  |
| 4205 | ENSG00000211734 | 37.85786261 | 2.209502854  | 0.461553664 | 7.53E-06 | TRBV5-1    | T cell receptor beta variable 5-1 [Source:HGNC Symbol;Acc:12218]                                   |
| 4206 | ENSG00000146409 | 215.4703149 | 1.017996195  | 0.212683339 | 7.55E-06 | SLC18B1    | solute carrier family 18, subfamily B, member 1 [Source:HGNC Symbol;Acc:21573]                     |
| 4207 | ENSG00000119655 | 1902.001224 | 0.430515225  | 0.089957818 | 7.58E-06 | NPC2       | Niemann-Pick disease, type C2 [Source:HGNC Symbol;Acc:14537]                                       |
| 4208 | ENSG00000139437 | 1118.560686 | -0.496953259 | 0.103887036 | 7.66E-06 | TCHP       | trichoplein, keratin filament binding [Source:HGNC Symbol;Acc:28135]                               |
| 4209 | ENSG00000262199 | 20.83151302 | -2.509944754 | 0.524758719 | 7.68E-06 | SRCIN1     | SRC kinase signaling inhibitor 1 [Source:HGNC Symbol;Acc:29506]                                    |
| 4210 | ENSG00000175857 | 2509.192529 | -0.362107372 | 0.07571395  | 7.69E-06 | GAPT       | GRB2-binding adaptor protein, transmembrane [Source:HGNC Symbol;Acc:26588]                         |
| 4211 | ENSG00000102580 | 2249.872079 | -0.379573856 | 0.079373891 | 7.71E-06 | DNAJC3     | DnaJ (Hsp40) homolog, subfamily C, member 3 [Source:HGNC Symbol;Acc:9439]                          |
| 4212 | ENSG00000017373 | 20.82747256 | -2.509420047 | 0.524768783 | 7.71E-06 | SRCIN1     | SRC kinase signaling inhibitor 1 [Source:HGNC Symbol;Acc:29506]                                    |
| 4213 | ENSG00000244480 | 284.4898488 | -0.938928293 | 0.196351101 | 7.71E-06 | AC005154.7 |                                                                                                    |
| 4214 | ENSG00000147526 | 4662.929904 | -0.337791134 | 0.070655162 | 7.75E-06 | TACC1      | transforming, acidic coiled-coil containing protein 1 [Source:HGNC Symbol;Acc:11522]               |
| 4215 | ENSG00000100697 | 5234.397584 | 0.326221485  | 0.068246536 | 7.78E-06 | DICER1     | dicer 1, ribonuclease type III [Source:HGNC Symbol;Acc:17098]                                      |
| 4216 | ENSG00000211696 | 33.02500831 | 2.34548738   | 0.49081332  | 7.83E-06 | TRGV8      | T cell receptor gamma variable 8 [Source:HGNC Symbol;Acc:12294]                                    |
| 4217 | ENSG0000080986  | 247.2789376 | -0.974479898 | 0.203973557 | 7.88E-06 | NDC80      | NDC80 kinetochore complex component [Source:HGNC Symbol;Acc:16909]                                 |
| 4218 | ENSG00000125944 | 2018.523228 | 0.434819975  | 0.091016129 | 7.88E-06 | HNRNPR     | heterogeneous nuclear ribonucleoprotein R [Source:HGNC Symbol;Acc:5047]                            |
| 4219 | ENSG00000196511 | 198.6173664 | 1.071354678  | 0.224259282 | 7.88E-06 | TPK1       | thiamin pyrophosphokinase 1 [Source:HGNC Symbol;Acc:17358]                                         |
| 4220 | ENSG00000223654 | 2151.944923 | -0.462884764 | 0.096916315 | 7.92E-06 | FLOT1      | flotillin 1 [Source:HGNC Symbol;Acc:3757]                                                          |
| 4221 | ENSG00000148384 | 227.3878199 | 1.039485885  | 0.217667655 | 7.95E-06 | INPP5E     | inositol polyphosphate-5-phosphatase, 72 kDa [Source:HGNC Symbol;Acc:21474]                        |
| 4222 | ENSG00000156304 | 1000.29914  | -0.500133147 | 0.104826858 | 8.12E-06 | SCAF4      | SR-related CTD-associated factor 4 [Source:HGNC Symbol;Acc:19304]                                  |

|      |                 |             |              |             |          |          |                                                                                                           |
|------|-----------------|-------------|--------------|-------------|----------|----------|-----------------------------------------------------------------------------------------------------------|
| 4223 | ENSG00000089505 | 133.7697276 | -1.273151614 | 0.266880806 | 8.14E-06 | CMTM1    | CKLF-like MARVEL transmembrane domain containing 1 [Source:HGNC Symbol;Acc:19172]                         |
| 4224 | ENSG00000174744 | 819.8563203 | 0.585529456  | 0.122850587 | 8.32E-06 | BRMS1    | breast cancer metastasis suppressor 1 [Source:HGNC Symbol;Acc:17262]                                      |
| 4225 | ENSG00000103502 | 1489.215583 | 0.528764986  | 0.110951034 | 8.33E-06 | CDIPT    | CDP-diacylglycerol--inositol 3-phosphatidyltransferase [Source:HGNC Symbol;Acc:1769]                      |
| 4226 | ENSG00000110921 | 157.5394049 | -1.186496671 | 0.249013973 | 8.37E-06 | MVK      | mevalonate kinase [Source:HGNC Symbol;Acc:7530]                                                           |
| 4227 | ENSG00000089127 | 362.3431003 | 0.83251742   | 0.174802773 | 8.46E-06 | OAS1     | 2'-5'-oligoadenylate synthetase 1, 40/46kDa [Source:HGNC Symbol;Acc:8086]                                 |
| 4228 | ENSG00000177119 | 785.5813774 | 0.607937862  | 0.127650697 | 8.46E-06 | ANO6     | anoctamin 6 [Source:HGNC Symbol;Acc:25240]                                                                |
| 4229 | ENSG00000182858 | 362.1088012 | 0.836832227  | 0.175749841 | 8.50E-06 | ALG12    | ALG12, alpha-1,6-mannosyltransferase [Source:HGNC Symbol;Acc:19358]                                       |
| 4230 | ENSG00000163703 | 394.9120224 | 0.780274993  | 0.163888076 | 8.52E-06 | CRELD1   | cysteine-rich with EGF-like domains 1 [Source:HGNC Symbol;Acc:14630]                                      |
| 4231 | ENSG00000163788 | 4071.639719 | 0.348737268  | 0.073266013 | 8.57E-06 | SNRK     | SNF related kinase [Source:HGNC Symbol;Acc:30598]                                                         |
| 4232 | ENSG00000187627 | 79.17734843 | 1.823505595  | 0.383127534 | 8.58E-06 | RGPD1    | RANBP2-like and GRIP domain containing 1 [Source:HGNC Symbol;Acc:32414]                                   |
| 4233 | ENSG00000168282 | 495.188519  | 0.728540806  | 0.153077135 | 8.59E-06 | MGAT2    | mannosyl (alpha-1,6-)-glycoprotein beta-1,2-N-acetylglucosaminyltransferase [Source:HGNC Symbol;Acc:7045] |
| 4234 | ENSG00000146587 | 557.4667487 | 0.698990222  | 0.146887318 | 8.61E-06 | RBAK     | RB-associated KRAB zinc finger [Source:HGNC Symbol;Acc:17680]                                             |
| 4235 | ENSG00000078043 | 340.9335287 | 0.927884409  | 0.194989042 | 8.61E-06 | PIAS2    | protein inhibitor of activated STAT, 2 [Source:HGNC Symbol;Acc:17311]                                     |
| 4236 | ENSG00000143621 | 1705.562665 | -0.394766593 | 0.082977727 | 8.66E-06 | ILF2     | interleukin enhancer binding factor 2 [Source:HGNC Symbol;Acc:6037]                                       |
| 4237 | ENSG00000149557 | 66.90536287 | 1.888946416  | 0.397151467 | 8.71E-06 | FEZ1     | fasciculation and elongation protein zeta 1 (zygin I) [Source:HGNC Symbol;Acc:3659]                       |
| 4238 | ENSG00000164099 | 15.60452545 | -2.650420043 | 0.557275288 | 8.72E-06 | PRSS12   | protease, serine, 12 (neurotrypsin, motopsin) [Source:HGNC Symbol;Acc:9477]                               |
| 4239 | ENSG00000261855 | 98.09036013 | -1.406927272 | 0.295835338 | 8.73E-06 | HYAL3    | hyaluronoglucosaminidase 3 [Source:HGNC Symbol;Acc:5322]                                                  |
| 4240 | ENSG00000125319 | 89.23452978 | -1.514475041 | 0.318656019 | 8.86E-06 | C17orf53 | chromosome 17 open reading frame 53 [Source:HGNC Symbol;Acc:28460]                                        |
| 4241 | ENSG00000172725 | 410.1820796 | 0.814570057  | 0.171456824 | 8.94E-06 | CORO1B   | coronin, actin binding protein, 1B [Source:HGNC Symbol;Acc:2253]                                          |
| 4242 | ENSG00000198799 | 663.4949239 | -0.674096778 | 0.141890831 | 8.94E-06 | LRIG2    | leucine-rich repeats and immunoglobulin-like domains 2 [Source:HGNC Symbol;Acc:20889]                     |
| 4243 | ENSG00000145476 | 781.7606858 | 0.600628639  | 0.126439453 | 8.96E-06 | CYP4V2   | cytochrome P450, family 4, subfamily V, polypeptide 2 [Source:HGNC Symbol;Acc:23198]                      |
| 4244 | ENSG00000148400 | 3051.826011 | 0.500718428  | 0.105419181 | 8.98E-06 | NOTCH1   | notch 1 [Source:HGNC Symbol;Acc:7881]                                                                     |
| 4245 | ENSG00000164187 | 540.3058693 | 0.681943104  | 0.143607781 | 9.03E-06 | LMBRD2   | LMBR1 domain containing 2 [Source:HGNC Symbol;Acc:25287]                                                  |
| 4246 | ENSG00000167566 | 437.6027932 | -0.823409004 | 0.173444478 | 9.08E-06 | NCKAP5L  | NCK-associated protein 5-like [Source:HGNC Symbol;Acc:29321]                                              |
| 4247 | ENSG00000164073 | 696.771219  | 0.627698444  | 0.132224953 | 9.09E-06 | MFSD8    | major facilitator superfamily domain containing 8 [Source:HGNC Symbol;Acc:28486]                          |
| 4248 | ENSG00000256069 | 70.08981096 | 1.739042307  | 0.366354541 | 9.10E-06 | A2MP1    | alpha-2-macroglobulin pseudogene 1 [Source:HGNC Symbol;Acc:8]                                             |
| 4249 | ENSG00000177731 | 5603.820041 | -0.266757454 | 0.056212192 | 9.16E-06 | FLII     | flightless I homolog (Drosophila) [Source:HGNC Symbol;Acc:3750]                                           |
| 4250 | ENSG00000131095 | 86.88355467 | -1.5380983   | 0.324299801 | 9.28E-06 | GFAP     | glial fibrillary acidic protein [Source:HGNC Symbol;Acc:4235]                                             |

|      |                 |             |              |             |          |              |                                                                                         |
|------|-----------------|-------------|--------------|-------------|----------|--------------|-----------------------------------------------------------------------------------------|
| 4251 | ENSG00000228696 | 220.4272514 | -0.98994258  | 0.20875932  | 9.31E-06 | ARL17B       | ADP-ribosylation factor-like 17B [Source:HGNC Symbol;Acc:32387]                         |
| 4252 | ENSG00000159459 | 897.4500628 | -0.53159007  | 0.112112172 | 9.33E-06 | UBR1         | ubiquitin protein ligase E3 component n-recognin 1 [Source:HGNC Symbol;Acc:16808]       |
| 4253 | ENSG00000183486 | 3682.387652 | 0.346326694  | 0.073048023 | 9.35E-06 | MX2          | myxovirus (influenza virus) resistance 2 (mouse) [Source:HGNC Symbol;Acc:7533]          |
| 4254 | ENSG00000242227 | 8.979921715 | -2.643861544 | 0.557770992 | 9.40E-06 | HLA-L        | major histocompatibility complex, class I, L (pseudogene) [Source:HGNC Symbol;Acc:4970] |
| 4255 | ENSG00000237719 | 88.90302783 | -1.500090155 | 0.316496498 | 9.41E-06 | RP1-179N16.3 |                                                                                         |
| 4256 | ENSG00000114650 | 1889.404422 | 0.45973493   | 0.097016481 | 9.46E-06 | SCAP         | SREBF chaperone [Source:HGNC Symbol;Acc:30634]                                          |
| 4257 | ENSG00000198336 | 107.9352098 | -1.357098677 | 0.286488973 | 9.54E-06 | MYL4         | myosin, light chain 4, alkali; atrial, embryonic [Source:HGNC Symbol;Acc:7585]          |
| 4258 | ENSG00000183726 | 3218.874492 | 0.368526491  | 0.077819159 | 9.60E-06 | TMEM50A      | transmembrane protein 50A [Source:HGNC Symbol;Acc:30590]                                |
| 4259 | ENSG00000187091 | 577.3830595 | -0.62798228  | 0.13265546  | 9.68E-06 | PLCD1        | phospholipase C, delta 1 [Source:HGNC Symbol;Acc:9060]                                  |
| 4260 | ENSG00000122008 | 666.83918   | -0.627280635 | 0.132545604 | 9.74E-06 | POLK         | polymerase (DNA directed) kappa [Source:HGNC Symbol;Acc:9183]                           |
| 4261 | ENSG00000155961 | 136.5943385 | 1.293701463  | 0.273415301 | 9.78E-06 | RAB39B       | RAB39B, member RAS oncogene family [Source:HGNC Symbol;Acc:16499]                       |
| 4262 | ENSG00000128739 | 156.6091011 | 1.311733217  | 0.277242845 | 9.79E-06 | SNRPN        | small nuclear ribonucleoprotein polypeptide N [Source:HGNC Symbol;Acc:11164]            |
| 4263 | ENSG00000105202 | 1509.74669  | 0.553230937  | 0.116945913 | 9.82E-06 | FBL          | fibrillarlin [Source:HGNC Symbol;Acc:3599]                                              |
| 4264 | ENSG00000230143 | 477.3851699 | -0.708374629 | 0.149781879 | 9.88E-06 | FLOT1        | flotillin 1 [Source:HGNC Symbol;Acc:3757]                                               |
| 4265 | ENSG00000012983 | 559.2491645 | 0.690725564  | 0.146055822 | 9.89E-06 | MAP4K5       | mitogen-activated protein kinase kinase kinase kinase 5 [Source:HGNC Symbol;Acc:6867]   |
| 4266 | ENSG00000162437 | 279.5820396 | -0.862623664 | 0.182424874 | 9.91E-06 | RAVER2       | ribonucleoprotein, PTB-binding 2 [Source:HGNC Symbol;Acc:25577]                         |
| 4267 | ENSG00000165915 | 354.7551823 | 1.048843569  | 0.221830298 | 9.94E-06 | SLC39A13     | solute carrier family 39 (zinc transporter), member 13 [Source:HGNC Symbol;Acc:20859]   |
| 4268 | ENSG00000162390 | 496.7800721 | -0.723389847 | 0.153082653 | 1.01E-05 | ACOT11       | acyl-CoA thioesterase 11 [Source:HGNC Symbol;Acc:18156]                                 |
| 4269 | ENSG00000138092 | 243.1806759 | -0.991245549 | 0.209766822 | 1.01E-05 | CENPO        | centromere protein O [Source:HGNC Symbol;Acc:28152]                                     |
| 4270 | ENSG00000100479 | 121.642877  | -1.29685334  | 0.274530552 | 1.01E-05 | POLE2        | polymerase (DNA directed), epsilon 2, accessory subunit [Source:HGNC Symbol;Acc:9178]   |
| 4271 | ENSG00000148572 | 2434.475974 | 0.373573538  | 0.079083296 | 1.01E-05 | NRBF2        | nuclear receptor binding factor 2 [Source:HGNC Symbol;Acc:19692]                        |
| 4272 | ENSG00000184678 | 3084.272039 | -0.338675555 | 0.071703356 | 1.02E-05 | HIST2H2BE    | histone cluster 2, H2be [Source:HGNC Symbol;Acc:4760]                                   |
| 4273 | ENSG00000155252 | 308.1736907 | 0.893155104  | 0.189117427 | 1.02E-05 | PI4K2A       | phosphatidylinositol 4-kinase type 2 alpha [Source:HGNC Symbol;Acc:30031]               |
| 4274 | ENSG00000196678 | 215.7744576 | -0.980810661 | 0.207690397 | 1.02E-05 | ERI2         | ERI1 exoribonuclease family member 2 [Source:HGNC Symbol;Acc:30541]                     |
| 4275 | ENSG00000074590 | 21.51865511 | 2.521880773  | 0.534107597 | 1.02E-05 | NUAK1        | NUAK family, SNF1-like kinase, 1 [Source:HGNC Symbol;Acc:14311]                         |
| 4276 | ENSG00000125149 | 814.7270101 | -0.587494518 | 0.124441599 | 1.03E-05 | C16orf70     | chromosome 16 open reading frame 70 [Source:HGNC Symbol;Acc:29564]                      |
| 4277 | ENSG00000186792 | 98.26978995 | -1.395231829 | 0.295617444 | 1.03E-05 | HYAL3        | hyaluronoglucosaminidase 3 [Source:HGNC Symbol;Acc:5322]                                |
| 4278 | ENSG00000152642 | 540.9656426 | -0.68095492  | 0.144285739 | 1.03E-05 | GPD1L        | glycerol-3-phosphate dehydrogenase 1-like [Source:HGNC Symbol;Acc:28956]                |

|      |                 |             |              |             |          |           |                                                                                                                       |
|------|-----------------|-------------|--------------|-------------|----------|-----------|-----------------------------------------------------------------------------------------------------------------------|
| 4279 | ENSG00000107882 | 339.3706131 | 0.813578069  | 0.172409644 | 1.04E-05 | SUFU      | suppressor of fused homolog (Drosophila) [Source:HGNC Symbol;Acc:16466]                                               |
| 4280 | ENSG00000197111 | 11791.8397  | 0.248271646  | 0.052612807 | 1.04E-05 | PCBP2     | poly(rC) binding protein 2 [Source:HGNC Symbol;Acc:8648]                                                              |
| 4281 | ENSG00000131100 | 2662.159006 | -0.345814346 | 0.073293101 | 1.04E-05 | ATP6V1E1  | ATPase, H+ transporting, lysosomal 31kDa, V1 subunit E1 [Source:HGNC Symbol;Acc:857]                                  |
| 4282 | ENSG00000107929 | 2391.365467 | -0.369760545 | 0.078375323 | 1.04E-05 | LARP4B    | La ribonucleoprotein domain family, member 4B [Source:HGNC Symbol;Acc:28987]                                          |
| 4283 | ENSG00000072062 | 3885.818749 | -0.292807873 | 0.06206978  | 1.04E-05 | PRKACA    | protein kinase, cAMP-dependent, catalytic, alpha [Source:HGNC Symbol;Acc:9380]                                        |
| 4284 | ENSG00000264719 | 3084.404137 | -0.338398043 | 0.071738127 | 1.04E-05 | HIST2H2BE | histone cluster 2, H2be [Source:HGNC Symbol;Acc:4760]                                                                 |
| 4285 | ENSG00000139291 | 311.2080912 | 1.148707918  | 0.243677322 | 1.06E-05 | TMEM19    | transmembrane protein 19 [Source:HGNC Symbol;Acc:25605]                                                               |
| 4286 | ENSG00000133195 | 628.2747063 | -0.729260552 | 0.154764354 | 1.07E-05 | SLC39A11  | solute carrier family 39, member 11 [Source:HGNC Symbol;Acc:14463]                                                    |
| 4287 | ENSG00000143727 | 856.8530477 | 0.539154441  | 0.114460483 | 1.08E-05 | ACP1      | acid phosphatase 1, soluble [Source:HGNC Symbol;Acc:122]                                                              |
| 4288 | ENSG00000125731 | 274.7305597 | 1.035089728  | 0.219813987 | 1.09E-05 | SH2D3A    | SH2 domain containing 3A [Source:HGNC Symbol;Acc:16885]                                                               |
| 4289 | ENSG00000125741 | 595.817829  | -0.618712427 | 0.131394059 | 1.09E-05 | OPA3      | optic atrophy 3 (autosomal recessive, with chorea and spastic paraplegia) [Source:HGNC Symbol;Acc:8142]               |
| 4290 | ENSG00000105656 | 1023.335931 | 0.598150052  | 0.127075678 | 1.10E-05 | ELL       | elongation factor RNA polymerase II [Source:HGNC Symbol;Acc:23114]                                                    |
| 4291 | ENSG00000004139 | 189.482814  | 1.084465218  | 0.230488493 | 1.11E-05 | SARM1     | sterile alpha and TIR motif containing 1 [Source:HGNC Symbol;Acc:17074]                                               |
| 4292 | ENSG00000152580 | 13.47269639 | -2.632032825 | 0.559455772 | 1.11E-05 | IGSF10    | immunoglobulin superfamily, member 10 [Source:HGNC Symbol;Acc:26384]                                                  |
| 4293 | ENSG00000100918 | 778.3490396 | -0.610696822 | 0.129883538 | 1.12E-05 | REC8      | REC8 meiotic recombination protein [Source:HGNC Symbol;Acc:16879]                                                     |
| 4294 | ENSG00000145715 | 1525.329039 | -0.455079214 | 0.096792605 | 1.13E-05 | RASA1     | RAS p21 protein activator (GTPase activating protein) 1 [Source:HGNC Symbol;Acc:9871]                                 |
| 4295 | ENSG00000137040 | 856.9929815 | 0.533582049  | 0.113512331 | 1.13E-05 | RANBP6    | RAN binding protein 6 [Source:HGNC Symbol;Acc:9851]                                                                   |
| 4296 | ENSG00000117525 | 45.71748676 | -1.936107209 | 0.412104102 | 1.14E-05 | F3        | coagulation factor III (thromboplastin, tissue factor) [Source:HGNC Symbol;Acc:3541]                                  |
| 4297 | ENSG00000242384 | 107.8266435 | -1.601150067 | 0.340827343 | 1.15E-05 | TBC1D3H   | TBC1 domain family, member 3H [Source:HGNC Symbol;Acc:30708]                                                          |
| 4298 | ENSG00000126457 | 720.4130092 | 0.655924529  | 0.139642418 | 1.15E-05 | PRMT1     | protein arginine methyltransferase 1 [Source:HGNC Symbol;Acc:5187]                                                    |
| 4299 | ENSG00000170915 | 558.7942864 | 0.669107989  | 0.142469483 | 1.15E-05 | PAQR8     | progesterin and adipoQ receptor family member VIII [Source:HGNC Symbol;Acc:15708]                                     |
| 4300 | ENSG00000168995 | 479.4871888 | 0.713943735  | 0.152058473 | 1.16E-05 | SIGLEC7   | sialic acid binding Ig-like lectin 7 [Source:HGNC Symbol;Acc:10876]                                                   |
| 4301 | ENSG00000181929 | 978.9244081 | -0.498780225 | 0.106306538 | 1.18E-05 | PRKAG1    | protein kinase, AMP-activated, gamma 1 non-catalytic subunit [Source:HGNC Symbol;Acc:9385]                            |
| 4302 | ENSG00000126458 | 85.90898328 | 1.530053191  | 0.326187971 | 1.18E-05 | RRAS      | related RAS viral (r-ras) oncogene homolog [Source:HGNC Symbol;Acc:10447]                                             |
| 4303 | ENSG00000161010 | 1196.612954 | 0.461150656  | 0.098315821 | 1.19E-05 | C5orf45   | chromosome 5 open reading frame 45 [Source:HGNC Symbol;Acc:30817]                                                     |
| 4304 | ENSG00000263156 | 2401.409329 | -0.405050084 | 0.086360114 | 1.19E-05 | GNAI2     | guanine nucleotide binding protein (G protein), alpha inhibiting activity polypeptide 2 [Source:HGNC Symbol;Acc:4385] |
| 4305 | ENSG00000154957 | 485.3250514 | 0.726642558  | 0.154928609 | 1.19E-05 | ZNF18     | zinc finger protein 18 [Source:HGNC Symbol;Acc:12969]                                                                 |
| 4306 | ENSG00000263175 | 18.80018348 | 2.533346141  | 0.540199422 | 1.19E-05 | KIR2DL2   | KIR2DL2 [Source:UniProtKB/TrEMBL;Acc:Q8N742]                                                                          |



|      |                 |             |              |             |          |               |                                                                                                                        |
|------|-----------------|-------------|--------------|-------------|----------|---------------|------------------------------------------------------------------------------------------------------------------------|
| 4307 | ENSG00000024862 | 836.3197647 | 0.543471961  | 0.115904084 | 1.19E-05 | CCDC28A       | coiled-coil domain containing 28A [Source:HGNC Symbol;Acc:21098]                                                       |
| 4308 | ENSG00000123685 | 74.52623099 | -1.621368454 | 0.345794539 | 1.19E-05 | BATF3         | basic leucine zipper transcription factor, ATF-like 3 [Source:HGNC Symbol;Acc:28915]                                   |
| 4309 | ENSG00000083168 | 3700.02578  | 0.32566673   | 0.069467388 | 1.20E-05 | KAT6A         | K(llysine) acetyltransferase 6A [Source:HGNC Symbol;Acc:13013]                                                         |
| 4310 | ENSG00000128536 | 71.01436025 | 1.637558325  | 0.349325074 | 1.20E-05 | CDHR3         | cadherin-related family member 3 [Source:HGNC Symbol;Acc:26308]                                                        |
| 4311 | ENSG00000117543 | 327.9546484 | 0.860801089  | 0.183652171 | 1.20E-05 | DPH5          | diphthamide biosynthesis 5 [Source:HGNC Symbol;Acc:24270]                                                              |
| 4312 | ENSG00000244165 | 102.1748845 | 1.559133533  | 0.332739183 | 1.21E-05 | P2RY11        | purinergic receptor P2Y, G-protein coupled, 11 [Source:HGNC Symbol;Acc:8540]                                           |
| 4313 | ENSG00000134152 | 1412.22611  | 0.491794409  | 0.10496317  | 1.21E-05 | KATNBL1       | katanin p80 subunit B-like 1 [Source:HGNC Symbol;Acc:26199]                                                            |
| 4314 | ENSG00000140563 | 2190.410533 | -0.416176191 | 0.088846261 | 1.22E-05 | MCTP2         | multiple C2 domains, transmembrane 2 [Source:HGNC Symbol;Acc:25636]                                                    |
| 4315 | ENSG00000160714 | 1917.478589 | 0.441171812  | 0.094211309 | 1.23E-05 | UBE2Q1        | ubiquitin-conjugating enzyme E2Q family member 1 [Source:HGNC Symbol;Acc:15698]                                        |
| 4316 | ENSG00000134970 | 871.7020631 | 0.582757585  | 0.124493635 | 1.24E-05 | TMED7         | transmembrane emp24 protein transport domain containing 7 [Source:HGNC Symbol;Acc:24253]                               |
| 4317 | ENSG00000205758 | 713.2278567 | -0.608362725 | 0.129974776 | 1.24E-05 | CRYZL1        | crystallin, zeta (quinone reductase)-like 1 [Source:HGNC Symbol;Acc:2420]                                              |
| 4318 | ENSG00000188820 | 603.5703055 | 0.622860897  | 0.133162734 | 1.26E-05 | FAM26F        | family with sequence similarity 26, member F [Source:HGNC Symbol;Acc:33391]                                            |
| 4319 | ENSG00000106701 | 236.5211018 | -1.051913627 | 0.224925955 | 1.26E-05 | FSD1L         | fibronectin type III and SPRY domain containing 1-like [Source:HGNC Symbol;Acc:13753]                                  |
| 4320 | ENSG00000188738 | 270.9994749 | -0.879479657 | 0.188155191 | 1.28E-05 | FSIP2         | fibrous sheath interacting protein 2 [Source:HGNC Symbol;Acc:21675]                                                    |
| 4321 | ENSG00000225603 | 22.66039171 | 2.420724742  | 0.518174729 | 1.29E-05 | RP11-325P15.1 |                                                                                                                        |
| 4322 | ENSG00000147121 | 299.1573027 | 0.849294177  | 0.181815014 | 1.30E-05 | KRBOX4        | KRAB box domain containing 4 [Source:HGNC Symbol;Acc:26007]                                                            |
| 4323 | ENSG00000213077 | 78.77375116 | -1.692386619 | 0.362498119 | 1.31E-05 | FAM106A       | family with sequence similarity 106, member A [Source:HGNC Symbol;Acc:25682]                                           |
| 4324 | ENSG00000069431 | 241.4948303 | -0.981638272 | 0.210319805 | 1.32E-05 | ABCC9         | ATP-binding cassette, sub-family C (CFTR/MRP), member 9 [Source:HGNC Symbol;Acc:60]                                    |
| 4325 | ENSG00000197465 | 44.21508354 | -2.095946829 | 0.449148492 | 1.33E-05 | GYPE          | glycophorin E (MNS blood group) [Source:HGNC Symbol;Acc:4705]                                                          |
| 4326 | ENSG00000146540 | 139.0408747 | 1.317692188  | 0.282376802 | 1.33E-05 | C7orf50       | chromosome 7 open reading frame 50 [Source:HGNC Symbol;Acc:22421]                                                      |
| 4327 | ENSG00000130779 | 2062.955345 | -0.403525519 | 0.086482213 | 1.33E-05 | CLIP1         | CAP-GLY domain containing linker protein 1 [Source:HGNC Symbol;Acc:10461]                                              |
| 4328 | ENSG00000159322 | 4421.683863 | -0.288897325 | 0.061920166 | 1.33E-05 | ADPGK         | ADP-dependent glucokinase [Source:HGNC Symbol;Acc:25250]                                                               |
| 4329 | ENSG00000204577 | 3605.104989 | 0.310720964  | 0.06662298  | 1.34E-05 | LILRB3        | leukocyte immunoglobulin-like receptor, subfamily B (with TM and ITIM domains), member 3 [Source:HGNC Symbol;Acc:6607] |
| 4330 | ENSG00000117614 | 1681.057723 | 0.43185365   | 0.092596057 | 1.34E-05 | SYF2          | SYF2 pre-mRNA-splicing factor [Source:HGNC Symbol;Acc:19824]                                                           |
| 4331 | ENSG00000176095 | 1623.767981 | 0.474545413  | 0.101822266 | 1.36E-05 | IP6K1         | inositol hexakisphosphate kinase 1 [Source:HGNC Symbol;Acc:18360]                                                      |
| 4332 | ENSG00000168916 | 163.8564133 | 1.17347667   | 0.251801147 | 1.36E-05 | ZNF608        | zinc finger protein 608 [Source:HGNC Symbol;Acc:29238]                                                                 |
| 4333 | ENSG00000185324 | 876.9353    | 0.590741982  | 0.126795677 | 1.37E-05 | CDK10         | cyclin-dependent kinase 10 [Source:HGNC Symbol;Acc:1770]                                                               |
| 4334 | ENSG00000167995 | 2559.199957 | -0.361815765 | 0.07767824  | 1.38E-05 | BEST1         | bestrophin 1 [Source:HGNC Symbol;Acc:12703]                                                                            |

|      |                 |             |              |             |          |          |                                                                                                                    |
|------|-----------------|-------------|--------------|-------------|----------|----------|--------------------------------------------------------------------------------------------------------------------|
| 4335 | ENSG00000137757 | 59.84393525 | 1.899086323  | 0.407840676 | 1.39E-05 | CASP5    | caspace 5, apoptosis-related cysteine peptidase [Source:HGNC Symbol;Acc:1506]                                      |
| 4336 | ENSG00000135392 | 867.5068572 | 0.583638464  | 0.125399286 | 1.40E-05 | DNAJC14  | DnaJ (Hsp40) homolog, subfamily C, member 14 [Source:HGNC Symbol;Acc:24581]                                        |
| 4337 | ENSG00000116350 | 2944.806654 | -0.359311747 | 0.077200976 | 1.40E-05 | SRSF4    | serine/arginine-rich splicing factor 4 [Source:HGNC Symbol;Acc:10786]                                              |
| 4338 | ENSG00000149289 | 147.7516115 | -1.227433622 | 0.263762439 | 1.41E-05 | ZC3H12C  | zinc finger CCCH-type containing 12C [Source:HGNC Symbol;Acc:29362]                                                |
| 4339 | ENSG00000211699 | 44.0040867  | 2.085448114  | 0.448168196 | 1.41E-05 | TRGV3    | T cell receptor gamma variable 3 [Source:HGNC Symbol;Acc:12288]                                                    |
| 4340 | ENSG00000163009 | 67.56123594 | -1.629634406 | 0.35021693  | 1.41E-05 | C2orf48  | chromosome 2 open reading frame 48 [Source:HGNC Symbol;Acc:26322]                                                  |
| 4341 | ENSG00000092108 | 857.0949238 | -0.601161173 | 0.12919504  | 1.41E-05 | SCFD1    | sec1 family domain containing 1 [Source:HGNC Symbol;Acc:20726]                                                     |
| 4342 | ENSG00000106105 | 1018.192839 | -0.477869402 | 0.10273938  | 1.42E-05 | GARS     | glycyl-tRNA synthetase [Source:HGNC Symbol;Acc:4162]                                                               |
| 4343 | ENSG00000170653 | 1472.21122  | -0.438590132 | 0.094303387 | 1.42E-05 | ATF7     | activating transcription factor 7 [Source:HGNC Symbol;Acc:792]                                                     |
| 4344 | ENSG00000137310 | 256.6182315 | -0.904129346 | 0.194426207 | 1.43E-05 | TCF19    | transcription factor 19 [Source:HGNC Symbol;Acc:11629]                                                             |
| 4345 | ENSG00000184381 | 625.7219928 | 0.642860137  | 0.138329198 | 1.45E-05 | PLA2G6   | phospholipase A2, group VI (cytosolic, calcium-independent) [Source:HGNC Symbol;Acc:9039]                          |
| 4346 | ENSG00000162144 | 1079.307007 | 0.478365451  | 0.102980056 | 1.46E-05 | CYB561A3 | cytochrome b561 family, member A3 [Source:HGNC Symbol;Acc:23014]                                                   |
| 4347 | ENSG00000214265 | 54.96659866 | 1.860784221  | 0.40064641  | 1.47E-05 | SNURF    | SNRPN upstream reading frame [Source:HGNC Symbol;Acc:11171]                                                        |
| 4348 | ENSG00000197119 | 779.2791511 | 0.620657071  | 0.133640711 | 1.47E-05 | SLC25A29 | solute carrier family 25 (mitochondrial carnitine/acylcarnitine carrier), member 29 [Source:HGNC Symbol;Acc:20116] |
| 4349 | ENSG00000084090 | 1941.400181 | 0.394588304  | 0.084965112 | 1.47E-05 | STARD7   | StAR-related lipid transfer (START) domain containing 7 [Source:HGNC Symbol;Acc:18063]                             |
| 4350 | ENSG00000168421 | 822.7217968 | 0.547328879  | 0.117901762 | 1.48E-05 | RHOH     | ras homolog family member H [Source:HGNC Symbol;Acc:686]                                                           |
| 4351 | ENSG00000263513 | 22.31012804 | -2.461965637 | 0.530424897 | 1.49E-05 | FAM72C   | Homo sapiens family with sequence similarity 72, member C (FAM72C), mRNA. [Source:RefSeq mRNA;Acc:NM_001287385]    |
| 4352 | ENSG00000011201 | 121.1584271 | -1.283791916 | 0.276626278 | 1.49E-05 | KAL1     | Kallmann syndrome 1 sequence [Source:HGNC Symbol;Acc:6211]                                                         |
| 4353 | ENSG00000262739 | 10.85420662 | 2.623534792  | 0.565448333 | 1.50E-05 | PRSS2    | protease, serine, 2 (trypsin 2) [Source:HGNC Symbol;Acc:9483]                                                      |
| 4354 | ENSG00000077782 | 154.7467406 | -1.235955407 | 0.26640692  | 1.50E-05 | FGFR1    | fibroblast growth factor receptor 1 [Source:HGNC Symbol;Acc:3688]                                                  |
| 4355 | ENSG00000135316 | 2158.45792  | 0.396742385  | 0.085534424 | 1.51E-05 | SYNCRIP  | synaptotagmin binding, cytoplasmic RNA interacting protein [Source:HGNC Symbol;Acc:16918]                          |
| 4356 | ENSG00000269007 | 75.0729337  | 1.65542888   | 0.356939106 | 1.51E-05 | LAGE3    | L antigen family member 3 [Source:UniProtKB/TrEMBL;Acc:B0S8I7]                                                     |
| 4357 | ENSG00000253276 | 244.0533129 | 0.934050211  | 0.201409915 | 1.51E-05 | CCDC71L  | coiled-coil domain containing 71-like [Source:HGNC Symbol;Acc:26685]                                               |
| 4358 | ENSG00000126759 | 5291.890192 | -0.362107874 | 0.078097182 | 1.52E-05 | CFP      | complement factor properdin [Source:HGNC Symbol;Acc:8864]                                                          |
| 4359 | ENSG00000126777 | 2077.27195  | 0.382350179  | 0.082463187 | 1.52E-05 | KTN1     | kinectin 1 (kinesin receptor) [Source:HGNC Symbol;Acc:6467]                                                        |
| 4360 | ENSG00000172432 | 2152.585277 | -0.373944448 | 0.080658789 | 1.52E-05 | GTPBP2   | GTP binding protein 2 [Source:HGNC Symbol;Acc:4670]                                                                |
| 4361 | ENSG00000179387 | 723.2040804 | -0.567641427 | 0.122443941 | 1.52E-05 | ELMOD2   | ELMO/CED-12 domain containing 2 [Source:HGNC Symbol;Acc:28111]                                                     |
| 4362 | ENSG00000141040 | 53.80811652 | 1.937511928  | 0.418038717 | 1.53E-05 | ZNF287   | zinc finger protein 287 [Source:HGNC Symbol;Acc:13502]                                                             |

|      |                 |             |              |             |          |               |                                                                                                  |
|------|-----------------|-------------|--------------|-------------|----------|---------------|--------------------------------------------------------------------------------------------------|
| 4363 | ENSG00000047056 | 1601.578377 | -0.411911721 | 0.088878433 | 1.53E-05 | WDR37         | WD repeat domain 37 [Source:HGNC Symbol;Acc:31406]                                               |
| 4364 | ENSG00000240342 | 238.094174  | 1.194317244  | 0.257730442 | 1.54E-05 | RPS2P5        | ribosomal protein S2 pseudogene 5 [Source:HGNC Symbol;Acc:31386]                                 |
| 4365 | ENSG00000166343 | 249.7863558 | -0.989581649 | 0.213553738 | 1.54E-05 | MSS51         | MSS51 mitochondrial translational activator [Source:HGNC Symbol;Acc:21000]                       |
| 4366 | ENSG00000136982 | 80.01891499 | -1.511112288 | 0.326120313 | 1.54E-05 | DSCC1         | DNA replication and sister chromatid cohesion 1 [Source:HGNC Symbol;Acc:24453]                   |
| 4367 | ENSG00000048052 | 195.7055587 | 1.071154047  | 0.231209818 | 1.55E-05 | HDAC9         | histone deacetylase 9 [Source:HGNC Symbol;Acc:14065]                                             |
| 4368 | ENSG00000198804 | 277466.6293 | -0.212548551 | 0.045892163 | 1.56E-05 | MT-CO1        | mitochondrially encoded cytochrome c oxidase I [Source:HGNC Symbol;Acc:7419]                     |
| 4369 | ENSG00000129473 | 505.5281757 | -0.667392495 | 0.144116252 | 1.56E-05 | BCL2L2        | BCL2-like 2 [Source:HGNC Symbol;Acc:995]                                                         |
| 4370 | ENSG00000055070 | 2155.063136 | 0.370638453  | 0.080064677 | 1.57E-05 | SZR1          | SUZ RNA binding domain containing 1 [Source:HGNC Symbol;Acc:30232]                               |
| 4371 | ENSG00000172037 | 113.0329484 | 1.323191192  | 0.285886459 | 1.58E-05 | LAMB2         | laminin, beta 2 (laminin 5) [Source:HGNC Symbol;Acc:6487]                                        |
| 4372 | ENSG00000132768 | 276.8829861 | 0.868730999  | 0.187763047 | 1.59E-05 | DPH2          | DPH2 homolog ( <i>S. cerevisiae</i> ) [Source:HGNC Symbol;Acc:3004]                              |
| 4373 | ENSG00000110958 | 3348.118352 | 0.312395215  | 0.067534115 | 1.60E-05 | PTGES3        | prostaglandin E synthase 3 (cytosolic) [Source:HGNC Symbol;Acc:16049]                            |
| 4374 | ENSG00000101333 | 35.42450353 | 2.19844688   | 0.475431892 | 1.61E-05 | PLCB4         | phospholipase C, beta 4 [Source:HGNC Symbol;Acc:9059]                                            |
| 4375 | ENSG00000149499 | 1563.656416 | 0.410280803  | 0.088746813 | 1.62E-05 | EML3          | echinoderm microtubule associated protein like 3 [Source:HGNC Symbol;Acc:26666]                  |
| 4376 | ENSG00000117682 | 523.9800896 | -0.671364388 | 0.145221575 | 1.62E-05 | DHDDS         | dehydrodolichyl diphosphate synthase [Source:HGNC Symbol;Acc:20603]                              |
| 4377 | ENSG00000266845 | 22.17512191 | 2.403336618  | 0.519876255 | 1.62E-05 | RP11-325P15.1 |                                                                                                  |
| 4378 | ENSG00000203691 | 88.65906647 | -1.475206035 | 0.319110682 | 1.62E-05 | AC092811.1    |                                                                                                  |
| 4379 | ENSG00000234511 | 225.3296345 | -0.992147134 | 0.214638433 | 1.62E-05 | C5orf58       | chromosome 5 open reading frame 58 [Source:HGNC Symbol;Acc:37272]                                |
| 4380 | ENSG00000109099 | 38.92977839 | -1.986583053 | 0.429813421 | 1.62E-05 | PMP22         | peripheral myelin protein 22 [Source:HGNC Symbol;Acc:9118]                                       |
| 4381 | ENSG00000101846 | 84.12977554 | 1.514514798  | 0.327783994 | 1.64E-05 | STS           | steroid sulfatase (microsomal), isozyme S [Source:HGNC Symbol;Acc:11425]                         |
| 4382 | ENSG00000075292 | 3846.992688 | -0.330630452 | 0.071563394 | 1.64E-05 | ZNF638        | zinc finger protein 638 [Source:HGNC Symbol;Acc:17894]                                           |
| 4383 | ENSG00000120686 | 1298.694463 | 0.435256449  | 0.094212208 | 1.64E-05 | UFM1          | ubiquitin-fold modifier 1 [Source:HGNC Symbol;Acc:20597]                                         |
| 4384 | ENSG00000173273 | 1011.685197 | -0.639533598 | 0.138431138 | 1.64E-05 | TNKS          | tankyrase, TRF1-interacting ankyrin-related ADP-ribose polymerase [Source:HGNC Symbol;Acc:11941] |
| 4385 | ENSG00000104154 | 138.5951292 | 1.621340976  | 0.350974286 | 1.64E-05 | SLC30A4       | solute carrier family 30 (zinc transporter), member 4 [Source:HGNC Symbol;Acc:11015]             |
| 4386 | ENSG00000204650 | 245.2006215 | 0.925788828  | 0.200429448 | 1.65E-05 | CRHR1-IT1     | CRHR1 intronic transcript 1 (non-protein coding) [Source:HGNC Symbol;Acc:26327]                  |
| 4387 | ENSG00000142303 | 67.82669881 | 1.820083281  | 0.394111911 | 1.65E-05 | ADAMTS10      | ADAM metalloproteinase with thrombospondin type 1 motif, 10 [Source:HGNC Symbol;Acc:13201]       |
| 4388 | ENSG00000008130 | 15310.80106 | -0.319591136 | 0.069229083 | 1.66E-05 | NADK          | NAD kinase [Source:HGNC Symbol;Acc:29831]                                                        |
| 4389 | ENSG00000029363 | 5550.600442 | 0.349599139  | 0.07574503  | 1.67E-05 | BCLAF1        | BCL2-associated transcription factor 1 [Source:HGNC Symbol;Acc:16863]                            |
| 4390 | ENSG00000147548 | 4335.798671 | -0.282516345 | 0.061210898 | 1.67E-05 | WHSC1L1       | Wolf-Hirschhorn syndrome candidate 1-like 1 [Source:HGNC Symbol;Acc:12767]                       |

|      |                 |             |              |             |          |         |                                                                                                                |
|------|-----------------|-------------|--------------|-------------|----------|---------|----------------------------------------------------------------------------------------------------------------|
| 4391 | ENSG00000103148 | 392.819653  | 0.792734746  | 0.171784174 | 1.68E-05 | NPRL3   | nitrogen permease regulator-like 3 ( <i>S. cerevisiae</i> ) [Source:HGNC Symbol;Acc:14124]                     |
| 4392 | ENSG00000148814 | 194.5508636 | 1.368580034  | 0.296583034 | 1.68E-05 | LRRC27  | leucine rich repeat containing 27 [Source:HGNC Symbol;Acc:29346]                                               |
| 4393 | ENSG00000173212 | 209.0159941 | -0.999510767 | 0.216614512 | 1.68E-05 | MAB21L3 | mab-21-like 3 ( <i>C. elegans</i> ) [Source:HGNC Symbol;Acc:26787]                                             |
| 4394 | ENSG00000135723 | 1258.094276 | -0.493427776 | 0.106980098 | 1.70E-05 | FHOD1   | formin homology 2 domain containing 1 [Source:HGNC Symbol;Acc:17905]                                           |
| 4395 | ENSG00000140092 | 78.77618804 | 1.608095872  | 0.348667365 | 1.70E-05 | FBLN5   | fibulin 5 [Source:HGNC Symbol;Acc:3602]                                                                        |
| 4396 | ENSG00000196172 | 119.8067237 | 1.394194225  | 0.302290998 | 1.70E-05 | ZNF681  | zinc finger protein 681 [Source:HGNC Symbol;Acc:26457]                                                         |
| 4397 | ENSG00000177971 | 437.0293163 | 0.737418272  | 0.159973417 | 1.72E-05 | IMP3    | IMP3, U3 small nucleolar ribonucleoprotein, homolog (yeast) [Source:HGNC Symbol;Acc:14497]                     |
| 4398 | ENSG00000165244 | 204.0699019 | -1.047114077 | 0.227205894 | 1.72E-05 | ZNF367  | zinc finger protein 367 [Source:HGNC Symbol;Acc:18320]                                                         |
| 4399 | ENSG00000148019 | 978.4035527 | 0.547534536  | 0.118816462 | 1.73E-05 | CEP78   | centrosomal protein 78kDa [Source:HGNC Symbol;Acc:25740]                                                       |
| 4400 | ENSG00000260873 | 612.6489867 | -0.81826628  | 0.177578925 | 1.73E-05 | SNTB2   | syntrophin, beta 2 (dystrophin-associated protein A1, 59kDa, basic component 2) [Source:HGNC Symbol;Acc:11169] |
| 4401 | ENSG00000204869 | 90.00840086 | -1.472328368 | 0.319556681 | 1.73E-05 | IGFL4   | IGF-like family member 4 [Source:HGNC Symbol;Acc:32931]                                                        |
| 4402 | ENSG00000266334 | 1069.679032 | 0.478479531  | 0.103863308 | 1.74E-05 | APH1A   | APH1A gamma secretase subunit [Source:HGNC Symbol;Acc:29509]                                                   |
| 4403 | ENSG00000196312 | 116.7240469 | -1.376665833 | 0.298942633 | 1.75E-05 | HIATL2  | hippocampus abundant transcript-like 2 [Source:HGNC Symbol;Acc:23672]                                          |
| 4404 | ENSG00000128203 | 110.3729803 | 1.32632939   | 0.28809941  | 1.76E-05 | ASPHD2  | aspartate beta-hydroxylase domain containing 2 [Source:HGNC Symbol;Acc:30437]                                  |
| 4405 | ENSG00000136536 | 5227.065499 | -0.330605722 | 0.071827412 | 1.77E-05 | MARCH7  | membrane-associated ring finger (C3HC4) 7, E3 ubiquitin protein ligase [Source:HGNC Symbol;Acc:17393]          |
| 4406 | ENSG00000130653 | 95.95022052 | 1.482669082  | 0.322198341 | 1.78E-05 | PNPLA7  | patatin-like phospholipase domain containing 7 [Source:HGNC Symbol;Acc:24768]                                  |
| 4407 | ENSG00000264639 | 32.49637227 | 2.367463317  | 0.514756125 | 1.80E-05 | NBPF13P | neuroblastoma breakpoint family, member 13, pseudogene [Source:HGNC Symbol;Acc:31995]                          |
| 4408 | ENSG00000108100 | 2430.130718 | 0.508801675  | 0.11063928  | 1.80E-05 | CCNY    | cyclin Y [Source:HGNC Symbol;Acc:23354]                                                                        |
| 4409 | ENSG00000259825 | 37.35013634 | 2.117960548  | 0.460585671 | 1.81E-05 | TRBV4-3 | T cell receptor beta variable 4-3 [Source:HGNC Symbol;Acc:12217]                                               |
| 4410 | ENSG00000171456 | 2241.029117 | 0.39874198   | 0.086721834 | 1.81E-05 | ASXL1   | additional sex combs like 1 ( <i>Drosophila</i> ) [Source:HGNC Symbol;Acc:18318]                               |
| 4411 | ENSG00000117362 | 1069.86326  | 0.477510437  | 0.103853413 | 1.81E-05 | APH1A   | APH1A gamma secretase subunit [Source:HGNC Symbol;Acc:29509]                                                   |
| 4412 | ENSG00000131188 | 66.69179624 | -1.672125332 | 0.36381801  | 1.83E-05 | PRR7    | proline rich 7 (synaptic) [Source:HGNC Symbol;Acc:28130]                                                       |
| 4413 | ENSG00000255319 | 48.26981282 | -1.89269217  | 0.412196349 | 1.86E-05 | ENPP7P8 | ectonucleotide pyrophosphatase/phosphodiesterase 7 pseudogene 8 [Source:HGNC Symbol;Acc:48691]                 |
| 4414 | ENSG00000241468 | 1420.902533 | -0.412280292 | 0.089793034 | 1.87E-05 | ATP5J2  | ATP synthase, H <sup>+</sup> transporting, mitochondrial Fo complex, subunit F2 [Source:HGNC Symbol;Acc:848]   |
| 4415 | ENSG00000112118 | 1436.967343 | -0.422835569 | 0.092107338 | 1.87E-05 | MCM3    | minichromosome maintenance complex component 3 [Source:HGNC Symbol;Acc:6945]                                   |
| 4416 | ENSG00000165209 | 493.9135598 | 0.730905805  | 0.15921853  | 1.87E-05 | STRBP   | spermatid perinuclear RNA binding protein [Source:HGNC Symbol;Acc:16462]                                       |
| 4417 | ENSG00000205268 | 3168.901789 | 0.322633472  | 0.070312688 | 1.89E-05 | PDE7A   | phosphodiesterase 7A [Source:HGNC Symbol;Acc:8791]                                                             |
| 4418 | ENSG00000110583 | 730.3299838 | 0.60811538   | 0.132541485 | 1.89E-05 | NAA40   | N(alpha)-acetyltransferase 40, NatD catalytic subunit [Source:HGNC Symbol;Acc:25845]                           |

|      |                 |             |              |             |          |              |                                                                                                                |
|------|-----------------|-------------|--------------|-------------|----------|--------------|----------------------------------------------------------------------------------------------------------------|
| 4419 | ENSG00000126756 | 951.4574691 | 0.487099494  | 0.106170507 | 1.90E-05 | UXT          | ubiquitously-expressed, prefoldin-like chaperone [Source:HGNC Symbol;Acc:12641]                                |
| 4420 | ENSG00000135108 | 324.1300213 | 1.07002048   | 0.233261039 | 1.90E-05 | FBXO21       | F-box protein 21 [Source:HGNC Symbol;Acc:13592]                                                                |
| 4421 | ENSG00000182463 | 105.917559  | 1.597084375  | 0.348289196 | 1.92E-05 | TSHZ2        | teashirt zinc finger homeobox 2 [Source:HGNC Symbol;Acc:13010]                                                 |
| 4422 | ENSG00000136718 | 496.2051539 | 0.670506558  | 0.146259732 | 1.93E-05 | IMP4         | IMP4, U3 small nucleolar ribonucleoprotein, homolog (yeast) [Source:HGNC Symbol;Acc:30856]                     |
| 4423 | ENSG00000127483 | 6239.117488 | -0.264766291 | 0.057766227 | 1.94E-05 | HP1BP3       | heterochromatin protein 1, binding protein 3 [Source:HGNC Symbol;Acc:24973]                                    |
| 4424 | ENSG00000105568 | 1999.21787  | 0.384945034  | 0.083987246 | 1.94E-05 | PPP2R1A      | protein phosphatase 2, regulatory subunit A, alpha [Source:HGNC Symbol;Acc:9302]                               |
| 4425 | ENSG00000100629 | 126.6051076 | -1.418421667 | 0.309832806 | 1.99E-05 | CEP128       | centrosomal protein 128kDa [Source:HGNC Symbol;Acc:20359]                                                      |
| 4426 | ENSG00000112367 | 899.9488655 | -0.510907101 | 0.111601348 | 1.99E-05 | FIG4         | FIG4 homolog, SAC1 lipid phosphatase domain containing ( <i>S. cerevisiae</i> ) [Source:HGNC Symbol;Acc:16873] |
| 4427 | ENSG00000146063 | 1530.265621 | -0.42094559  | 0.091962865 | 1.99E-05 | TRIM41       | tripartite motif containing 41 [Source:HGNC Symbol;Acc:19013]                                                  |
| 4428 | ENSG00000258256 | 69.12855167 | -1.563185383 | 0.341582317 | 2.00E-05 | RP11-219B4.5 | Uncharacterized protein [Source:UniProtKB/TrEMBL;Acc:F8VYV3]                                                   |
| 4429 | ENSG00000100883 | 1145.625315 | -0.495055969 | 0.108191393 | 2.01E-05 | SRP54        | signal recognition particle 54kDa [Source:HGNC Symbol;Acc:11301]                                               |
| 4430 | ENSG00000072518 | 2784.715203 | -0.348959002 | 0.076271628 | 2.01E-05 | MARK2        | MAP/microtubule affinity-regulating kinase 2 [Source:HGNC Symbol;Acc:3332]                                     |
| 4431 | ENSG00000038382 | 430.2674096 | 0.988573513  | 0.216073127 | 2.01E-05 | TRIO         | trio Rho guanine nucleotide exchange factor [Source:HGNC Symbol;Acc:12303]                                     |
| 4432 | ENSG00000128394 | 193.5052627 | 1.146095945  | 0.25053667  | 2.01E-05 | APOBEC3F     | apolipoprotein B mRNA editing enzyme, catalytic polypeptide-like 3F [Source:HGNC Symbol;Acc:17356]             |
| 4433 | ENSG00000166012 | 2440.113111 | 0.398280313  | 0.087064369 | 2.01E-05 | TAF1D        | TATA box binding protein (TBP)-associated factor, RNA polymerase I, D, 41kDa [Source:HGNC Symbol;Acc:28759]    |
| 4434 | ENSG00000214357 | 73.27545756 | 1.577598757  | 0.344902449 | 2.02E-05 | NEURL1B      | neuralized E3 ubiquitin protein ligase 1B [Source:HGNC Symbol;Acc:35422]                                       |
| 4435 | ENSG00000120158 | 241.6744975 | -0.972859456 | 0.212703378 | 2.02E-05 | RCL1         | RNA terminal phosphate cyclase-like 1 [Source:HGNC Symbol;Acc:17687]                                           |
| 4436 | ENSG00000164659 | 61.07082839 | 1.779505936  | 0.38922508  | 2.04E-05 | KIAA1324L    | KIAA1324-like [Source:HGNC Symbol;Acc:21945]                                                                   |
| 4437 | ENSG00000133243 | 737.9103769 | 0.748908128  | 0.163810571 | 2.04E-05 | BTBD2        | BTB (POZ) domain containing 2 [Source:HGNC Symbol;Acc:15504]                                                   |
| 4438 | ENSG00000206579 | 72.08374935 | 1.712167615  | 0.374507965 | 2.04E-05 | XKR4         | XK, Kell blood group complex subunit-related family, member 4 [Source:HGNC Symbol;Acc:29394]                   |
| 4439 | ENSG00000186648 | 49.305898   | 1.945206685  | 0.425649852 | 2.06E-05 | LRRC16B      | leucine rich repeat containing 16B [Source:HGNC Symbol;Acc:20272]                                              |
| 4440 | ENSG00000145725 | 1930.869797 | -0.440446731 | 0.096384391 | 2.06E-05 | PIIP5K2      | diphosphoinositol pentakisphosphate kinase 2 [Source:HGNC Symbol;Acc:29035]                                    |
| 4441 | ENSG00000106261 | 2195.295687 | 0.413209415  | 0.090425623 | 2.06E-05 | ZKSCAN1      | zinc finger with KRAB and SCAN domains 1 [Source:HGNC Symbol;Acc:13101]                                        |
| 4442 | ENSG00000164385 | 20.12977475 | -2.412349625 | 0.528151459 | 2.08E-05 | C6orf195     | chromosome 6 open reading frame 195 [Source:HGNC Symbol;Acc:21600]                                             |
| 4443 | ENSG00000174231 | 5794.590408 | 0.326406704  | 0.071463113 | 2.08E-05 | PRPF8        | pre-mRNA processing factor 8 [Source:HGNC Symbol;Acc:17340]                                                    |
| 4444 | ENSG00000211802 | 34.93260848 | 2.191608583  | 0.479858233 | 2.08E-05 | TRAV22       | T cell receptor alpha variable 22 [Source:HGNC Symbol;Acc:12119]                                               |
| 4445 | ENSG00000168564 | 588.7801213 | 0.633975233  | 0.13882093  | 2.08E-05 | CDKN2AIP     | CDKN2A interacting protein [Source:HGNC Symbol;Acc:24325]                                                      |
| 4446 | ENSG00000267368 | 926.6961476 | 0.607790348  | 0.133121276 | 2.10E-05 | UPK3BL       | uropodin 3B-like [Source:HGNC Symbol;Acc:37278]                                                                |

|      |                 |             |              |             |          |              |                                                                                                                       |
|------|-----------------|-------------|--------------|-------------|----------|--------------|-----------------------------------------------------------------------------------------------------------------------|
| 4447 | ENSG00000236287 | 2029.000982 | 0.385218471  | 0.084372598 | 2.10E-05 | ZBED5        | zinc finger, BED-type containing 5 [Source:HGNC Symbol;Acc:30803]                                                     |
| 4448 | ENSG00000079215 | 45.1457493  | -1.937972159 | 0.424477896 | 2.10E-05 | SLC1A3       | solute carrier family 1 (glial high affinity glutamate transporter), member 3 [Source:HGNC Symbol;Acc:10941]          |
| 4449 | ENSG00000160049 | 495.3536202 | 0.692558713  | 0.151711396 | 2.10E-05 | DFFA         | DNA fragmentation factor, 45kDa, alpha polypeptide [Source:HGNC Symbol;Acc:2772]                                      |
| 4450 | ENSG00000038219 | 6319.797699 | -0.312174426 | 0.068388977 | 2.10E-05 | BOD1L1       | bioorientation of chromosomes in cell division 1-like 1 [Source:HGNC Symbol;Acc:31792]                                |
| 4451 | ENSG00000168159 | 767.1558804 | 0.567288039  | 0.124293232 | 2.11E-05 | RNF187       | ring finger protein 187 [Source:HGNC Symbol;Acc:27146]                                                                |
| 4452 | ENSG00000089335 | 610.5218358 | 0.660488339  | 0.144715642 | 2.11E-05 | ZNF302       | zinc finger protein 302 [Source:HGNC Symbol;Acc:13848]                                                                |
| 4453 | ENSG00000135469 | 218.5515537 | 1.007560688  | 0.220837204 | 2.12E-05 | COQ10A       | coenzyme Q10 homolog A (S. cerevisiae) [Source:HGNC Symbol;Acc:26515]                                                 |
| 4454 | ENSG00000117394 | 713.5488206 | 0.644507707  | 0.141327926 | 2.15E-05 | SLC2A1       | solute carrier family 2 (facilitated glucose transporter), member 1 [Source:HGNC Symbol;Acc:11005]                    |
| 4455 | ENSG00000158156 | 1329.751183 | 0.453655014  | 0.09954148  | 2.18E-05 | XKR8         | XK, Kell blood group complex subunit-related family, member 8 [Source:HGNC Symbol;Acc:25508]                          |
| 4456 | ENSG00000186017 | 178.0924258 | 1.136000618  | 0.249269372 | 2.18E-05 | ZNF566       | zinc finger protein 566 [Source:HGNC Symbol;Acc:25919]                                                                |
| 4457 | ENSG00000188554 | 3328.283748 | 0.337270512  | 0.074029717 | 2.19E-05 | NBR1         | neighbor of BRCA1 gene 1 [Source:HGNC Symbol;Acc:6746]                                                                |
| 4458 | ENSG00000235173 | 163.0128759 | 1.211504646  | 0.266006603 | 2.21E-05 | FAM203A      | family with sequence similarity 203, member A [Source:HGNC Symbol;Acc:24161]                                          |
| 4459 | ENSG00000123983 | 812.8987628 | -0.530486528 | 0.116487278 | 2.21E-05 | ACSL3        | acyl-CoA synthetase long-chain family member 3 [Source:HGNC Symbol;Acc:3570]                                          |
| 4460 | ENSG00000113141 | 3194.91516  | 0.346873886  | 0.076179907 | 2.22E-05 | IK           | IK cytokine, down-regulator of HLA II [Source:HGNC Symbol;Acc:5958]                                                   |
| 4461 | ENSG00000051128 | 232.0439928 | -0.968513796 | 0.212708297 | 2.22E-05 | HOMER3       | homer homolog 3 (Drosophila) [Source:HGNC Symbol;Acc:17514]                                                           |
| 4462 | ENSG00000270670 | 22.17609248 | 2.352051549  | 0.516577701 | 2.22E-05 | RP11-248C1.3 |                                                                                                                       |
| 4463 | ENSG00000100439 | 849.7437538 | 0.703346939  | 0.154477743 | 2.22E-05 | ABHD4        | abhydrolase domain containing 4 [Source:HGNC Symbol;Acc:20154]                                                        |
| 4464 | ENSG00000261601 | 30.86069525 | 2.243442494  | 0.492763213 | 2.22E-05 | TRBV10-3     | T cell receptor beta variable 10-3 [Source:HGNC Symbol;Acc:12179]                                                     |
| 4465 | ENSG00000100296 | 944.3233566 | 0.534417673  | 0.117410636 | 2.23E-05 | THOC5        | THO complex 5 [Source:HGNC Symbol;Acc:19074]                                                                          |
| 4466 | ENSG00000120708 | 934.3542033 | 0.600745887  | 0.132006368 | 2.24E-05 | TGFBI        | transforming growth factor, beta-induced, 68kDa [Source:HGNC Symbol;Acc:11771]                                        |
| 4467 | ENSG00000182809 | 27.3429565  | 2.292427723  | 0.503788105 | 2.24E-05 | CRIP2        | cysteine-rich protein 2 [Source:HGNC Symbol;Acc:2361]                                                                 |
| 4468 | ENSG00000136238 | 5623.282394 | 0.261115168  | 0.057383781 | 2.24E-05 | RAC1         | ras-related C3 botulinum toxin substrate 1 (rho family, small GTP binding protein Rac1) [Source:HGNC Symbol;Acc:9801] |
| 4469 | ENSG00000149633 | 39.8753769  | -1.951606856 | 0.428927345 | 2.25E-05 | KIAA1755     | KIAA1755 [Source:HGNC Symbol;Acc:29372]                                                                               |
| 4470 | ENSG00000164970 | 812.3892479 | -0.533601898 | 0.117294511 | 2.25E-05 | FAM219A      | family with sequence similarity 219, member A [Source:HGNC Symbol;Acc:19920]                                          |
| 4471 | ENSG00000179837 | 988.5214908 | 1.217637005  | 0.267691609 | 2.26E-05 | RBM15B       | RNA binding motif protein 15B [Source:HGNC Symbol;Acc:24303]                                                          |
| 4472 | ENSG00000087086 | 58184.31159 | 0.205357037  | 0.045151859 | 2.26E-05 | FTL          | ferritin, light polypeptide [Source:HGNC Symbol;Acc:3999]                                                             |
| 4473 | ENSG00000198917 | 701.6167784 | 0.605037378  | 0.133056118 | 2.27E-05 | C9orf114     | chromosome 9 open reading frame 114 [Source:HGNC Symbol;Acc:26933]                                                    |
| 4474 | ENSG00000268489 | 1817.522927 | 0.380848232  | 0.083756645 | 2.28E-05 | RBM3         | RNA binding motif (RNP1, RRM) protein 3 [Source:HGNC Symbol;Acc:9900]                                                 |

|      |                 |             |              |             |          |          |                                                                                                                       |
|------|-----------------|-------------|--------------|-------------|----------|----------|-----------------------------------------------------------------------------------------------------------------------|
| 4475 | ENSG00000169660 | 587.7977113 | 0.650562786  | 0.143076315 | 2.28E-05 | HEXDC    | hexosaminidase (glycosyl hydrolase family 20, catalytic domain) containing [Source:HGNC Symbol;Acc:26307]             |
| 4476 | ENSG00000090661 | 434.4942353 | 0.754470478  | 0.165941366 | 2.28E-05 | CERS4    | ceramide synthase 4 [Source:HGNC Symbol;Acc:23747]                                                                    |
| 4477 | ENSG00000068697 | 1645.099057 | 0.394024778  | 0.086679132 | 2.29E-05 | LAPTM4A  | lysosomal protein transmembrane 4 alpha [Source:HGNC Symbol;Acc:6924]                                                 |
| 4478 | ENSG00000226182 | 1493.145268 | 0.455859753  | 0.100331952 | 2.31E-05 | LST1     | leukocyte specific transcript 1 [Source:HGNC Symbol;Acc:14189]                                                        |
| 4479 | ENSG00000102317 | 1817.339456 | 0.380547408  | 0.083765961 | 2.32E-05 | RBM3     | RNA binding motif (RNP1, RRM) protein 3 [Source:HGNC Symbol;Acc:9900]                                                 |
| 4480 | ENSG00000271572 | 826.7040983 | 0.536045569  | 0.118004107 | 2.32E-05 | RPS9     | ribosomal protein S9 [Source:HGNC Symbol;Acc:10442]                                                                   |
| 4481 | ENSG00000197847 | 138.3931593 | -1.264616765 | 0.278540545 | 2.35E-05 | SLC22A20 | solute carrier family 22, member 20 [Source:HGNC Symbol;Acc:29867]                                                    |
| 4482 | ENSG00000198795 | 24.80138814 | -2.405012764 | 0.529871053 | 2.36E-05 | ZNF521   | zinc finger protein 521 [Source:HGNC Symbol;Acc:24605]                                                                |
| 4483 | ENSG00000213614 | 1899.174421 | -0.373427877 | 0.082282899 | 2.37E-05 | HEXA     | hexosaminidase A (alpha polypeptide) [Source:HGNC Symbol;Acc:4878]                                                    |
| 4484 | ENSG00000132388 | 1426.762387 | 0.442945951  | 0.097601981 | 2.37E-05 | UBE2G1   | ubiquitin-conjugating enzyme E2G 1 [Source:HGNC Symbol;Acc:12482]                                                     |
| 4485 | ENSG00000126368 | 113.8748808 | 1.34663886   | 0.296736573 | 2.37E-05 | NR1D1    | nuclear receptor subfamily 1, group D, member 1 [Source:HGNC Symbol;Acc:7962]                                         |
| 4486 | ENSG00000175711 | 863.3156468 | 0.579620635  | 0.127737383 | 2.37E-05 | B3GNTL1  | UDP-GlcNAc:betaGal beta-1,3-N-acetylglucosaminyltransferase-like 1 [Source:HGNC Symbol;Acc:21727]                     |
| 4487 | ENSG00000128340 | 10765.6626  | -0.671578622 | 0.148034056 | 2.38E-05 | RAC2     | ras-related C3 botulinum toxin substrate 2 (rho family, small GTP binding protein Rac2) [Source:HGNC Symbol;Acc:9802] |
| 4488 | ENSG00000169891 | 1893.761943 | -0.455007872 | 0.100327096 | 2.40E-05 | REPS2    | RALBP1 associated Eps domain containing 2 [Source:HGNC Symbol;Acc:9963]                                               |
| 4489 | ENSG00000128578 | 69.47295537 | -1.617746262 | 0.356784506 | 2.41E-05 | STRIP2   | striatin interacting protein 2 [Source:HGNC Symbol;Acc:22209]                                                         |
| 4490 | ENSG00000106852 | 9.818015284 | 2.554864639  | 0.563505469 | 2.41E-05 | LHX6     | LIM homeobox 6 [Source:HGNC Symbol;Acc:21735]                                                                         |
| 4491 | ENSG00000131969 | 879.09042   | -0.540836706 | 0.119321627 | 2.43E-05 | ABHD12B  | abhydrolase domain containing 12B [Source:HGNC Symbol;Acc:19837]                                                      |
| 4492 | ENSG00000196636 | 238.7782692 | -1.053699116 | 0.232473569 | 2.43E-05 | ACN9     | ACN9 homolog (S. cerevisiae) [Source:HGNC Symbol;Acc:21752]                                                           |
| 4493 | ENSG00000109113 | 215.5433541 | 0.992769111  | 0.219098095 | 2.44E-05 | RAB34    | RAB34, member RAS oncogene family [Source:HGNC Symbol;Acc:16519]                                                      |
| 4494 | ENSG00000153234 | 246.8882618 | -0.873975306 | 0.192891323 | 2.45E-05 | NR4A2    | nuclear receptor subfamily 4, group A, member 2 [Source:HGNC Symbol;Acc:7981]                                         |
| 4495 | ENSG00000111424 | 506.8763269 | -0.671440371 | 0.148202776 | 2.45E-05 | VDR      | vitamin D (1,25- dihydroxyvitamin D3) receptor [Source:HGNC Symbol;Acc:12679]                                         |
| 4496 | ENSG00000272325 | 5573.040549 | -0.27148034  | 0.059940761 | 2.47E-05 | NUDT3    | nudix (nucleoside diphosphate linked moiety X)-type motif 3 [Source:HGNC Symbol;Acc:8050]                             |
| 4497 | ENSG00000124222 | 6283.84709  | -0.257028205 | 0.056766092 | 2.48E-05 | STX16    | syntaxin 16 [Source:HGNC Symbol;Acc:11431]                                                                            |
| 4498 | ENSG00000262024 | 794.9817065 | 0.538431222  | 0.118922233 | 2.48E-05 | TCF20    | transcription factor 20 (AR1) [Source:HGNC Symbol;Acc:11631]                                                          |
| 4499 | ENSG00000172663 | 264.2105382 | 1.046324574  | 0.23126584  | 2.52E-05 | TMEM134  | transmembrane protein 134 [Source:HGNC Symbol;Acc:26142]                                                              |
| 4500 | ENSG00000181704 | 752.6190961 | -0.568141137 | 0.125578852 | 2.52E-05 | YIPF6    | Yip1 domain family, member 6 [Source:HGNC Symbol;Acc:28304]                                                           |
| 4501 | ENSG00000198894 | 404.9184961 | 0.801259627  | 0.17712871  | 2.53E-05 | CIPC     | CLOCK-interacting pacemaker [Source:HGNC Symbol;Acc:20365]                                                            |
| 4502 | ENSG00000174469 | 60.16495993 | 1.724127395  | 0.381188775 | 2.53E-05 | CNTNAP2  | contactin associated protein-like 2 [Source:HGNC Symbol;Acc:13830]                                                    |

|      |                 |             |              |             |          |            |                                                                                                                        |
|------|-----------------|-------------|--------------|-------------|----------|------------|------------------------------------------------------------------------------------------------------------------------|
| 4503 | ENSG00000165672 | 1401.928375 | -0.432083859 | 0.095547553 | 2.54E-05 | PRDX3      | peroxiredoxin 3 [Source:HGNC Symbol;Acc:9354]                                                                          |
| 4504 | ENSG00000107140 | 371.9217188 | 0.807526116  | 0.178658016 | 2.57E-05 | TESK1      | testis-specific kinase 1 [Source:HGNC Symbol;Acc:11731]                                                                |
| 4505 | ENSG00000093000 | 4978.774922 | -0.305400898 | 0.067567517 | 2.57E-05 | NUP50      | nucleoporin 50kDa [Source:HGNC Symbol;Acc:8065]                                                                        |
| 4506 | ENSG00000263062 | 2200.497227 | 0.417156395  | 0.092326263 | 2.59E-05 | NAIP       | NLR family, apoptosis inhibitory protein [Source:HGNC Symbol;Acc:7634]                                                 |
| 4507 | ENSG00000168904 | 403.2502681 | -0.719297085 | 0.159224564 | 2.60E-05 | LRRC28     | leucine rich repeat containing 28 [Source:HGNC Symbol;Acc:28355]                                                       |
| 4508 | ENSG00000211794 | 36.57905725 | 2.103394293  | 0.465826966 | 2.62E-05 | TRAV12-3   | T cell receptor alpha variable 12-3 [Source:HGNC Symbol;Acc:12107]                                                     |
| 4509 | ENSG00000213934 | 158.0085727 | 1.078572161  | 0.238884139 | 2.63E-05 | HGB1       | hemoglobin, gamma A [Source:HGNC Symbol;Acc:4831]                                                                      |
| 4510 | ENSG00000173992 | 621.7977451 | 0.641349479  | 0.14206201  | 2.63E-05 | CCS        | copper chaperone for superoxide dismutase [Source:HGNC Symbol;Acc:1613]                                                |
| 4511 | ENSG00000100207 | 794.9737269 | 0.536484657  | 0.118835737 | 2.63E-05 | TCF20      | transcription factor 20 (AR1) [Source:HGNC Symbol;Acc:11631]                                                           |
| 4512 | ENSG00000234536 | 201.2465145 | -1.002566215 | 0.222112009 | 2.64E-05 | AC096582.7 |                                                                                                                        |
| 4513 | ENSG00000138668 | 6103.227394 | -0.288634359 | 0.063946045 | 2.64E-05 | HNRNPD     | heterogeneous nuclear ribonucleoprotein D (AU-rich element RNA binding protein 1, 37kDa) [Source:HGNC Symbol;Acc:5036] |
| 4514 | ENSG00000163479 | 3633.782249 | 0.294149743  | 0.065174905 | 2.65E-05 | SSR2       | signal sequence receptor, beta (translocon-associated protein beta) [Source:HGNC Symbol;Acc:11324]                     |
| 4515 | ENSG00000126790 | 156.8126336 | 1.186684147  | 0.263023072 | 2.67E-05 | L3HYPDH    | L-3-hydroxyproline dehydratase (trans-) [Source:HGNC Symbol;Acc:20488]                                                 |
| 4516 | ENSG00000001167 | 1582.234776 | -0.400841239 | 0.088871664 | 2.68E-05 | NFYA       | nuclear transcription factor Y, alpha [Source:HGNC Symbol;Acc:7804]                                                    |
| 4517 | ENSG00000181894 | 255.7523866 | 0.922152892  | 0.204469469 | 2.69E-05 | ZNF329     | zinc finger protein 329 [Source:HGNC Symbol;Acc:14209]                                                                 |
| 4518 | ENSG00000143442 | 2983.668151 | -0.404955115 | 0.089793754 | 2.69E-05 | POGZ       | pogo transposable element with ZNF domain [Source:HGNC Symbol;Acc:18801]                                               |
| 4519 | ENSG00000253293 | 22.14811271 | -2.314098029 | 0.513273726 | 2.70E-05 | HOXA10     | homeobox A10 [Source:HGNC Symbol;Acc:5100]                                                                             |
| 4520 | ENSG00000111647 | 1081.952548 | -0.467924194 | 0.103788345 | 2.70E-05 | UHRF1BP1L  | UHRF1 binding protein 1-like [Source:HGNC Symbol;Acc:29102]                                                            |
| 4521 | ENSG00000268151 | 50.7298456  | 1.884751361  | 0.418341587 | 2.74E-05 | ARMCX2     | armadillo repeat containing, X-linked 2 [Source:HGNC Symbol;Acc:16869]                                                 |
| 4522 | ENSG00000119326 | 152.2339809 | -1.155804614 | 0.256560748 | 2.75E-05 | CTNNA1     | catenin (cadherin-associated protein), alpha-like 1 [Source:HGNC Symbol;Acc:2512]                                      |
| 4523 | ENSG00000198554 | 196.7987585 | -1.035426241 | 0.229868144 | 2.75E-05 | WDHD1      | WD repeat and HMG-box DNA binding protein 1 [Source:HGNC Symbol;Acc:23170]                                             |
| 4524 | ENSG00000152380 | 229.8609995 | -1.000931435 | 0.222254734 | 2.76E-05 | FAM151B    | family with sequence similarity 151, member B [Source:HGNC Symbol;Acc:33716]                                           |
| 4525 | ENSG00000128609 | 585.2556293 | 0.627495665  | 0.139388869 | 2.79E-05 | NDUFA5     | NADH dehydrogenase (ubiquinone) 1 alpha subcomplex, 5 [Source:HGNC Symbol;Acc:7688]                                    |
| 4526 | ENSG00000163814 | 91.0241668  | -1.387678139 | 0.308312678 | 2.80E-05 | CDCP1      | CUB domain containing protein 1 [Source:HGNC Symbol;Acc:24357]                                                         |
| 4527 | ENSG00000116663 | 331.3642214 | -0.842829953 | 0.187359274 | 2.83E-05 | FBXO6      | F-box protein 6 [Source:HGNC Symbol;Acc:13585]                                                                         |
| 4528 | ENSG00000100106 | 2149.093672 | -0.488963318 | 0.108707854 | 2.84E-05 | TRIOBP     | TRIO and F-actin binding protein [Source:HGNC Symbol;Acc:17009]                                                        |
| 4529 | ENSG00000160199 | 557.5597157 | -0.685448145 | 0.152401896 | 2.84E-05 | PKNOX1     | PBX/knotted 1 homeobox 1 [Source:HGNC Symbol;Acc:9022]                                                                 |
| 4530 | ENSG00000047579 | 354.3729311 | 0.784874243  | 0.174519301 | 2.84E-05 | DTNBP1     | dystrobrevin binding protein 1 [Source:HGNC Symbol;Acc:17328]                                                          |



|      |                 |             |              |             |          |               |                                                                                                            |
|------|-----------------|-------------|--------------|-------------|----------|---------------|------------------------------------------------------------------------------------------------------------|
| 4531 | ENSG00000270931 | 27.06066042 | 2.27462178   | 0.50579154  | 2.84E-05 | CRIP2         | cysteine-rich protein 2 [Source:HGNC Symbol;Acc:2361]                                                      |
| 4532 | ENSG00000216588 | 30.15993011 | 2.289039739  | 0.508998543 | 2.84E-05 | IGSF23        | immunoglobulin superfamily, member 23 [Source:HGNC Symbol;Acc:40040]                                       |
| 4533 | ENSG00000249316 | 213.9947886 | -0.944719921 | 0.210197568 | 2.88E-05 | CTC-493P15.2  |                                                                                                            |
| 4534 | ENSG00000125900 | 113.992977  | -1.276938102 | 0.284364544 | 2.93E-05 | SIRPD         | signal-regulatory protein delta [Source:HGNC Symbol;Acc:16248]                                             |
| 4535 | ENSG00000262279 | 100.1917239 | 1.671941275  | 0.372527615 | 2.97E-05 | NCAM1         | neural cell adhesion molecule 1 [Source:HGNC Symbol;Acc:7656]                                              |
| 4536 | ENSG00000152154 | 16.71485408 | 2.490394896  | 0.55502725  | 2.98E-05 | TMEM178A      | transmembrane protein 178A [Source:HGNC Symbol;Acc:28517]                                                  |
| 4537 | ENSG00000180437 | 25.42469089 | -2.209476984 | 0.492491727 | 2.99E-05 | OR6K4P        | olfactory receptor, family 6, subfamily K, member 4 pseudogene [Source:HGNC Symbol;Acc:15031]              |
| 4538 | ENSG00000135250 | 2137.914713 | 0.384304723  | 0.085683063 | 3.00E-05 | SRPK2         | SRSF protein kinase 2 [Source:HGNC Symbol;Acc:11306]                                                       |
| 4539 | ENSG00000102218 | 749.7240187 | -0.548151298 | 0.122217946 | 3.01E-05 | RP2           | retinitis pigmentosa 2 (X-linked recessive) [Source:HGNC Symbol;Acc:10274]                                 |
| 4540 | ENSG00000271091 | 749.7240187 | -0.548151298 | 0.122217946 | 3.01E-05 | RP2           | retinitis pigmentosa 2 (X-linked recessive) [Source:HGNC Symbol;Acc:10274]                                 |
| 4541 | ENSG00000100852 | 513.7489515 | 0.850656778  | 0.189685093 | 3.01E-05 | ARHGAP5       | Rho GTPase activating protein 5 [Source:HGNC Symbol;Acc:675]                                               |
| 4542 | ENSG00000090372 | 1924.494923 | 0.430660737  | 0.096042018 | 3.02E-05 | STRN4         | striatin, calmodulin binding protein 4 [Source:HGNC Symbol;Acc:15721]                                      |
| 4543 | ENSG00000100266 | 2838.335989 | 0.311563986  | 0.069490827 | 3.02E-05 | PACSIN2       | protein kinase C and casein kinase substrate in neurons 2 [Source:HGNC Symbol;Acc:8571]                    |
| 4544 | ENSG00000176871 | 1199.145929 | -0.454686802 | 0.101429357 | 3.03E-05 | WSB2          | WD repeat and SOCS box containing 2 [Source:HGNC Symbol;Acc:19222]                                         |
| 4545 | ENSG00000169093 | 517.8665309 | 0.682155103  | 0.152216495 | 3.05E-05 | ASMTL         | acetylserotonin O-methyltransferase-like [Source:HGNC Symbol;Acc:751]                                      |
| 4546 | ENSG0000005882  | 186.9664789 | 1.194235595  | 0.266553945 | 3.07E-05 | PK2           | pyruvate dehydrogenase kinase, isozyme 2 [Source:HGNC Symbol;Acc:8810]                                     |
| 4547 | ENSG00000205808 | 134.149013  | 1.294640997  | 0.288971059 | 3.07E-05 | PPAPDC2       | phosphatidic acid phosphatase type 2 domain containing 2 [Source:HGNC Symbol;Acc:23682]                    |
| 4548 | ENSG00000095574 | 932.8435081 | 0.51318869   | 0.114558961 | 3.08E-05 | IKZF5         | IKAROS family zinc finger 5 (Pegasus) [Source:HGNC Symbol;Acc:14283]                                       |
| 4549 | ENSG00000154359 | 727.8535132 | -0.550839814 | 0.123057182 | 3.12E-05 | LONRF1        | LON peptidase N-terminal domain and ring finger 1 [Source:HGNC Symbol;Acc:26302]                           |
| 4550 | ENSG00000213983 | 5277.0584   | -0.259940235 | 0.058073521 | 3.13E-05 | AP1G2         | adaptor-related protein complex 1, gamma 2 subunit [Source:HGNC Symbol;Acc:556]                            |
| 4551 | ENSG00000100300 | 3217.835553 | -1.086016242 | 0.242638738 | 3.13E-05 | TSPO          | translocator protein (18kDa) [Source:HGNC Symbol;Acc:1158]                                                 |
| 4552 | ENSG00000149591 | 319.1656271 | 0.828112534  | 0.185109142 | 3.16E-05 | TAGLN         | transgelin [Source:HGNC Symbol;Acc:11553]                                                                  |
| 4553 | ENSG00000156232 | 564.0638785 | 0.616189274  | 0.137743132 | 3.16E-05 | WHAMM         | WAS protein homolog associated with actin, golgi membranes and microtubules [Source:HGNC Symbol;Acc:30493] |
| 4554 | ENSG00000185418 | 235.0213624 | 1.037688836  | 0.232014498 | 3.18E-05 | TARSL2        | threonyl-tRNA synthetase-like 2 [Source:HGNC Symbol;Acc:24728]                                             |
| 4555 | ENSG00000184828 | 70.87804987 | -1.708986133 | 0.382138101 | 3.18E-05 | ZBTB7C        | zinc finger and BTB domain containing 7C [Source:HGNC Symbol;Acc:31700]                                    |
| 4556 | ENSG00000128951 | 1116.512343 | -0.491379253 | 0.109887844 | 3.19E-05 | DUT           | deoxyuridine triphosphatase [Source:HGNC Symbol;Acc:3078]                                                  |
| 4557 | ENSG00000144674 | 1250.49605  | 0.45702495   | 0.102259125 | 3.22E-05 | GOLGA4        | golgin A4 [Source:HGNC Symbol;Acc:4427]                                                                    |
| 4558 | ENSG00000219433 | 20.56053183 | -2.330855312 | 0.521614233 | 3.23E-05 | RP11-350J20.4 |                                                                                                            |

|      |                 |             |              |             |          |               |                                                                                    |
|------|-----------------|-------------|--------------|-------------|----------|---------------|------------------------------------------------------------------------------------|
| 4559 | ENSG00000038532 | 803.2356703 | -0.537774438 | 0.120357713 | 3.24E-05 | CLEC16A       | C-type lectin domain family 16, member A [Source:HGNC Symbol;Acc:29013]            |
| 4560 | ENSG00000167972 | 69.87083953 | 1.720162198  | 0.385013973 | 3.24E-05 | ABCA3         | ATP-binding cassette, sub-family A (ABC1), member 3 [Source:HGNC Symbol;Acc:33]    |
| 4561 | ENSG00000164961 | 962.7999551 | -0.504838075 | 0.112995894 | 3.24E-05 | KIAA0196      | KIAA0196 [Source:HGNC Symbol;Acc:28984]                                            |
| 4562 | ENSG00000166128 | 3467.65725  | -0.317022407 | 0.070966623 | 3.25E-05 | RAB8B         | RAB8B, member RAS oncogene family [Source:HGNC Symbol;Acc:30273]                   |
| 4563 | ENSG00000110200 | 764.1005658 | -0.645327726 | 0.144491618 | 3.27E-05 | ANAPC15       | anaphase promoting complex subunit 15 [Source:HGNC Symbol;Acc:24531]               |
| 4564 | ENSG00000250989 | 62.45553519 | -1.64466731  | 0.36858958  | 3.33E-05 | RP11-392E22.5 |                                                                                    |
| 4565 | ENSG00000138867 | 2041.647871 | -0.349362864 | 0.078312237 | 3.34E-05 | GUCD1         | guanylyl cyclase domain containing 1 [Source:HGNC Symbol;Acc:14237]                |
| 4566 | ENSG00000156860 | 3595.737081 | -0.365054011 | 0.081853973 | 3.36E-05 | FBR3          | fibrosin [Source:HGNC Symbol;Acc:20442]                                            |
| 4567 | ENSG00000124702 | 1394.511837 | 0.410480225  | 0.092048552 | 3.37E-05 | KLHDC3        | kelch domain containing 3 [Source:HGNC Symbol;Acc:20704]                           |
| 4568 | ENSG00000179348 | 344.5998264 | -0.7847828   | 0.175988258 | 3.37E-05 | GATA2         | GATA binding protein 2 [Source:HGNC Symbol;Acc:4171]                               |
| 4569 | ENSG00000103353 | 512.1302899 | 0.674092465  | 0.151194307 | 3.38E-05 | UBFD1         | ubiquitin family domain containing 1 [Source:HGNC Symbol;Acc:30565]                |
| 4570 | ENSG00000116171 | 1552.145583 | -0.419702049 | 0.094138967 | 3.38E-05 | SCP2          | sterol carrier protein 2 [Source:HGNC Symbol;Acc:10606]                            |
| 4571 | ENSG00000017427 | 49.43787521 | -1.9183586   | 0.430455931 | 3.41E-05 | IGF1          | insulin-like growth factor 1 (somatomedin C) [Source:HGNC Symbol;Acc:5464]         |
| 4572 | ENSG00000153132 | 10.38728757 | -2.521650039 | 0.565934003 | 3.42E-05 | CLGN          | calmegin [Source:HGNC Symbol;Acc:2060]                                             |
| 4573 | ENSG00000205784 | 161.7585068 | -1.068795371 | 0.239873296 | 3.42E-05 | ARRDC5        | arrestin domain containing 5 [Source:HGNC Symbol;Acc:31407]                        |
| 4574 | ENSG00000198518 | 196.1429453 | -1.00508808  | 0.225627451 | 3.44E-05 | HIST1H4E      | histone cluster 1, H4e [Source:HGNC Symbol;Acc:4790]                               |
| 4575 | ENSG00000133119 | 186.6607278 | -1.061097212 | 0.238287507 | 3.46E-05 | RFC3          | replication factor C (activator 1) 3, 38kDa [Source:HGNC Symbol;Acc:9971]          |
| 4576 | ENSG00000166261 | 291.8893222 | 0.931144324  | 0.209282779 | 3.52E-05 | ZNF202        | zinc finger protein 202 [Source:HGNC Symbol;Acc:12994]                             |
| 4577 | ENSG00000127423 | 66.60291912 | -1.615567796 | 0.363190777 | 3.54E-05 | AUNIP         | aurora kinase A and ninein interacting protein [Source:HGNC Symbol;Acc:28363]      |
| 4578 | ENSG00000165698 | 104.7186748 | 1.361679352  | 0.30618545  | 3.56E-05 | C9orf9        | chromosome 9 open reading frame 9 [Source:HGNC Symbol;Acc:1367]                    |
| 4579 | ENSG00000260885 | 29.16777881 | 2.173029824  | 0.488818792 | 3.58E-05 | TRBV6-2       | T cell receptor beta variable 6-2 (gene/pseudogene) [Source:HGNC Symbol;Acc:12227] |
| 4580 | ENSG00000185507 | 524.3966973 | 0.8034929    | 0.180789285 | 3.60E-05 | IRF7          | interferon regulatory factor 7 [Source:HGNC Symbol;Acc:6122]                       |
| 4581 | ENSG00000271043 | 8238.342666 | -0.237753172 | 0.053497393 | 3.60E-05 | MTRNR2L2      | MT-RNR2-like 2 [Source:HGNC Symbol;Acc:37156]                                      |
| 4582 | ENSG00000105443 | 1495.897411 | 0.426671902  | 0.096035143 | 3.63E-05 | CYTH2         | cytohesin 2 [Source:HGNC Symbol;Acc:9502]                                          |
| 4583 | ENSG00000090565 | 250.0250123 | 1.007910942  | 0.226891406 | 3.63E-05 | RAB11FIP3     | RAB11 family interacting protein 3 (class II) [Source:HGNC Symbol;Acc:17224]       |
| 4584 | ENSG00000180891 | 830.0153687 | -0.567794722 | 0.127834922 | 3.64E-05 | CUEDC1        | CUE domain containing 1 [Source:HGNC Symbol;Acc:31350]                             |
| 4585 | ENSG00000187049 | 637.3280324 | -0.585622749 | 0.131862046 | 3.65E-05 | TMEM216       | transmembrane protein 216 [Source:HGNC Symbol;Acc:25018]                           |
| 4586 | ENSG00000166145 | 893.8013875 | 0.508944651  | 0.114604268 | 3.66E-05 | SPINT1        | serine peptidase inhibitor, Kunitz type 1 [Source:HGNC Symbol;Acc:11246]           |

|      |                 |             |              |             |          |            |                                                                                                                                                               |
|------|-----------------|-------------|--------------|-------------|----------|------------|---------------------------------------------------------------------------------------------------------------------------------------------------------------|
| 4587 | ENSG00000263344 | 2264.853074 | 0.341404421  | 0.076893692 | 3.67E-05 | EIF4H      | eukaryotic translation initiation factor 4H [Source:HGNC Symbol;Acc:12741]                                                                                    |
| 4588 | ENSG00000213463 | 103.7015446 | 1.311616323  | 0.295507178 | 3.69E-05 | SYNJ2BP    | synaptojanin 2 binding protein [Source:HGNC Symbol;Acc:18955]                                                                                                 |
| 4589 | ENSG00000130935 | 660.8697099 | 0.591868528  | 0.133352637 | 3.70E-05 | NOL11      | nucleolar protein 11 [Source:HGNC Symbol;Acc:24557]                                                                                                           |
| 4590 | ENSG00000012061 | 710.7334439 | 0.553316047  | 0.124671774 | 3.70E-05 | ERCC1      | excision repair cross-complementing rodent repair deficiency, complementation group 1 (includes overlapping antisense sequence) [Source:HGNC Symbol;Acc:3433] |
| 4591 | ENSG00000172059 | 161.7951572 | 1.156279123  | 0.26054768  | 3.70E-05 | KLF11      | Kruppel-like factor 11 [Source:HGNC Symbol;Acc:11811]                                                                                                         |
| 4592 | ENSG00000163684 | 838.3281449 | 0.524253616  | 0.118135481 | 3.70E-05 | RPP14      | ribonuclease P/MRP 14kDa subunit [Source:HGNC Symbol;Acc:30327]                                                                                               |
| 4593 | ENSG00000127947 | 4534.089417 | -0.29764034  | 0.067078115 | 3.71E-05 | PTPN12     | protein tyrosine phosphatase, non-receptor type 12 [Source:HGNC Symbol;Acc:9645]                                                                              |
| 4594 | ENSG00000174132 | 226.8742387 | 1.00913759   | 0.227522982 | 3.75E-05 | FAM174A    | family with sequence similarity 174, member A [Source:HGNC Symbol;Acc:24943]                                                                                  |
| 4595 | ENSG00000148483 | 17.96590406 | 2.46561398   | 0.555961501 | 3.75E-05 | TMEM236    | transmembrane protein 236 [Source:HGNC Symbol;Acc:23473]                                                                                                      |
| 4596 | ENSG00000106682 | 2265.243498 | 0.341168388  | 0.076937263 | 3.76E-05 | EIF4H      | eukaryotic translation initiation factor 4H [Source:HGNC Symbol;Acc:12741]                                                                                    |
| 4597 | ENSG00000232938 | 299.1429299 | -0.802021068 | 0.180916893 | 3.78E-05 | AC139099.3 |                                                                                                                                                               |
| 4598 | ENSG00000138346 | 211.8487378 | -0.958009666 | 0.21614697  | 3.80E-05 | DNA2       | DNA replication helicase/nuclease 2 [Source:HGNC Symbol;Acc:2939]                                                                                             |
| 4599 | ENSG00000182827 | 706.3443999 | 0.578576178  | 0.130542051 | 3.80E-05 | ACBD3      | acyl-CoA binding domain containing 3 [Source:HGNC Symbol;Acc:15453]                                                                                           |
| 4600 | ENSG00000164169 | 287.718044  | -0.895668254 | 0.202151836 | 3.82E-05 | PRMT10     | protein arginine methyltransferase 10 (putative) [Source:HGNC Symbol;Acc:25099]                                                                               |
| 4601 | ENSG00000235436 | 76.5564044  | -1.449796079 | 0.327270031 | 3.83E-05 | DPY19L2P4  | DPY19L2 pseudogene 4 [Source:HGNC Symbol;Acc:22176]                                                                                                           |
| 4602 | ENSG00000198805 | 1227.54352  | -0.419173555 | 0.094626349 | 3.84E-05 | PNP        | purine nucleoside phosphorylase [Source:HGNC Symbol;Acc:7892]                                                                                                 |
| 4603 | ENSG00000070423 | 321.312196  | 0.95041478   | 0.214607113 | 3.86E-05 | RNF126     | ring finger protein 126 [Source:HGNC Symbol;Acc:21151]                                                                                                        |
| 4604 | ENSG00000255823 | 12285.26413 | -0.27622938  | 0.062374439 | 3.86E-05 | MTRNR2L8   | MT-RNR2-like 8 [Source:HGNC Symbol;Acc:37165]                                                                                                                 |
| 4605 | ENSG00000174989 | 182.9831676 | 1.03506357   | 0.233865825 | 3.90E-05 | FBXW8      | F-box and WD repeat domain containing 8 [Source:HGNC Symbol;Acc:13597]                                                                                        |
| 4606 | ENSG00000105248 | 179.0800786 | 1.050193659  | 0.237291413 | 3.90E-05 | CCDC94     | coiled-coil domain containing 94 [Source:HGNC Symbol;Acc:25518]                                                                                               |
| 4607 | ENSG00000110987 | 365.3025239 | 0.720664827  | 0.162851425 | 3.91E-05 | BCL7A      | B-cell CLL/lymphoma 7A [Source:HGNC Symbol;Acc:1004]                                                                                                          |
| 4608 | ENSG00000133983 | 324.6241794 | 0.830290041  | 0.187626392 | 3.91E-05 | COX16      | COX16 cytochrome c oxidase assembly homolog (S. cerevisiae) [Source:HGNC Symbol;Acc:20213]                                                                    |
| 4609 | ENSG00000106459 | 749.1182381 | -0.58313075  | 0.131779939 | 3.92E-05 | NRF1       | nuclear respiratory factor 1 [Source:HGNC Symbol;Acc:7996]                                                                                                    |
| 4610 | ENSG00000158850 | 829.1834352 | 0.541766933  | 0.12250457  | 3.96E-05 | B4GALT3    | UDP-Gal:betaGlcNAc beta 1,4- galactosyltransferase, polypeptide 3 [Source:HGNC Symbol;Acc:926]                                                                |
| 4611 | ENSG00000187189 | 568.703543  | 0.595710393  | 0.134717369 | 3.97E-05 | TSPYL4     | TSPY-like 4 [Source:HGNC Symbol;Acc:21559]                                                                                                                    |
| 4612 | ENSG00000197299 | 252.5685597 | -0.8551745   | 0.193399998 | 3.97E-05 | BLM        | Bloom syndrome, RecQ helicase-like [Source:HGNC Symbol;Acc:1058]                                                                                              |
| 4613 | ENSG00000133884 | 1894.717761 | 0.414780532  | 0.093811481 | 3.98E-05 | DPF2       | D4, zinc and double PHD fingers family 2 [Source:HGNC Symbol;Acc:9964]                                                                                        |
| 4614 | ENSG00000146574 | 1277.66155  | -0.456362708 | 0.103319118 | 4.06E-05 | CCZ1B      | CCZ1 vacuolar protein trafficking and biogenesis associated homolog B (S. cerevisiae) [Source:HGNC Symbol;Acc:21717]                                          |

|      |                 |             |              |             |          |         |                                                                                                     |
|------|-----------------|-------------|--------------|-------------|----------|---------|-----------------------------------------------------------------------------------------------------|
| 4615 | ENSG00000196628 | 422.0540708 | 0.958362562  | 0.21697404  | 4.06E-05 | TCF4    | transcription factor 4 [Source:HGNC Symbol;Acc:11634]                                               |
| 4616 | ENSG00000135424 | 141.1081628 | -1.196208097 | 0.270825753 | 4.06E-05 | ITGA7   | integrin, alpha 7 [Source:HGNC Symbol;Acc:6143]                                                     |
| 4617 | ENSG00000224838 | 797.3964791 | 0.513505309  | 0.116276092 | 4.07E-05 | FKSG52  |                                                                                                     |
| 4618 | ENSG00000104325 | 1752.904251 | -0.376031176 | 0.085147926 | 4.07E-05 | DECR1   | 2,4-dienoyl CoA reductase 1, mitochondrial [Source:HGNC Symbol;Acc:2753]                            |
| 4619 | ENSG00000138413 | 953.5521466 | -0.511475845 | 0.115825739 | 4.08E-05 | IDH1    | isocitrate dehydrogenase 1 (NADP+), soluble [Source:HGNC Symbol;Acc:5382]                           |
| 4620 | ENSG00000129993 | 940.9602554 | 0.493063096  | 0.111667916 | 4.08E-05 | CBFA2T3 | core-binding factor, runt domain, alpha subunit 2; translocated to, 3 [Source:HGNC Symbol;Acc:1537] |
| 4621 | ENSG00000158402 | 62.14641138 | -1.627678615 | 0.368645571 | 4.09E-05 | CDC25C  | cell division cycle 25C [Source:HGNC Symbol;Acc:1727]                                               |
| 4622 | ENSG00000137628 | 365.6874604 | 0.854208843  | 0.193504786 | 4.10E-05 | DDX60   | DEAD (Asp-Glu-Ala-Asp) box polypeptide 60 [Source:HGNC Symbol;Acc:25942]                            |
| 4623 | ENSG00000263332 | 437.8235201 | 0.70685454   | 0.160129855 | 4.10E-05 | RPS9    | ribosomal protein S9 [Source:HGNC Symbol;Acc:10442]                                                 |
| 4624 | ENSG00000196700 | 306.7884376 | 0.918119361  | 0.207991131 | 4.10E-05 | ZNF512B | zinc finger protein 512B [Source:HGNC Symbol;Acc:29212]                                             |
| 4625 | ENSG00000104904 | 19104.33526 | -0.308752867 | 0.069946842 | 4.10E-05 | OAZ1    | ornithine decarboxylase antizyme 1 [Source:HGNC Symbol;Acc:8095]                                    |
| 4626 | ENSG00000110711 | 778.6673347 | 0.530014934  | 0.120178532 | 4.18E-05 | AIP     | aryl hydrocarbon receptor interacting protein [Source:HGNC Symbol;Acc:358]                          |
| 4627 | ENSG00000173917 | 91.34713032 | 1.751257056  | 0.397091132 | 4.18E-05 | HOXB2   | homeobox B2 [Source:HGNC Symbol;Acc:5113]                                                           |
| 4628 | ENSG00000099337 | 568.1580882 | -0.646728901 | 0.146646236 | 4.18E-05 | KCNK6   | potassium channel, subfamily K, member 6 [Source:HGNC Symbol;Acc:6281]                              |
| 4629 | ENSG00000231834 | 377.760172  | 0.881280739  | 0.199834492 | 4.18E-05 | HLA-A   | major histocompatibility complex, class I, A [Source:HGNC Symbol;Acc:4931]                          |
| 4630 | ENSG00000065029 | 905.3766464 | 0.58032942   | 0.131605723 | 4.19E-05 | ZNF76   | zinc finger protein 76 [Source:HGNC Symbol;Acc:13149]                                               |
| 4631 | ENSG00000078246 | 123.76212   | 1.260532388  | 0.285929093 | 4.21E-05 | TULP3   | tubby like protein 3 [Source:HGNC Symbol;Acc:12425]                                                 |
| 4632 | ENSG00000134294 | 5670.763002 | -0.27781356  | 0.063024451 | 4.21E-05 | SLC38A2 | solute carrier family 38, member 2 [Source:HGNC Symbol;Acc:13448]                                   |
| 4633 | ENSG00000268040 | 60.11028912 | -1.69224184  | 0.383902793 | 4.21E-05 | PRED62  | Uncharacterized protein [Source:UniProtKB/TrEMBL;Acc:MOR1E6]                                        |
| 4634 | ENSG00000105792 | 225.3116785 | -0.899159371 | 0.203994459 | 4.22E-05 | C7orf63 | chromosome 7 open reading frame 63 [Source:HGNC Symbol;Acc:26107]                                   |
| 4635 | ENSG00000261626 | 28.88131966 | 2.159466152  | 0.489965031 | 4.22E-05 | TRBV6-3 | T cell receptor beta variable 6-3 [Source:HGNC Symbol;Acc:12228]                                    |
| 4636 | ENSG00000055955 | 640.0571804 | -0.688410124 | 0.156200801 | 4.23E-05 | ITIH4   | inter-alpha-trypsin inhibitor heavy chain family, member 4 [Source:HGNC Symbol;Acc:6169]            |
| 4637 | ENSG00000165733 | 648.6258181 | 0.571267868  | 0.129621325 | 4.23E-05 | BMS1    | BMS1 ribosome biogenesis factor [Source:HGNC Symbol;Acc:23505]                                      |
| 4638 | ENSG00000263005 | 1197.60291  | 0.460400745  | 0.104556823 | 4.30E-05 | RASSF1  | Ras association (RalGDS/AF-6) domain family member 1 [Source:HGNC Symbol;Acc:9882]                  |
| 4639 | ENSG00000068028 | 1197.476056 | 0.461399798  | 0.104816258 | 4.33E-05 | RASSF1  | Ras association (RalGDS/AF-6) domain family member 1 [Source:HGNC Symbol;Acc:9882]                  |
| 4640 | ENSG00000140464 | 1375.440169 | -0.425273812 | 0.09661492  | 4.33E-05 | PML     | promyelocytic leukemia [Source:HGNC Symbol;Acc:9113]                                                |
| 4641 | ENSG00000091009 | 869.6399085 | 0.574022966  | 0.130409152 | 4.33E-05 | RBM27   | RNA binding motif protein 27 [Source:HGNC Symbol;Acc:29243]                                         |
| 4642 | ENSG00000160570 | 2287.269529 | 0.363224695  | 0.082524575 | 4.34E-05 | DEDD2   | death effector domain containing 2 [Source:HGNC Symbol;Acc:24450]                                   |

|      |                 |             |              |             |          |              |                                                                                                                                |
|------|-----------------|-------------|--------------|-------------|----------|--------------|--------------------------------------------------------------------------------------------------------------------------------|
| 4643 | ENSG00000260106 | 27.97425452 | 2.176915752  | 0.494736487 | 4.36E-05 | TRBV5-6      | T cell receptor beta variable 5-6 [Source:HGNC Symbol;Acc:12223]                                                               |
| 4644 | ENSG00000211728 | 27.97425452 | 2.176915752  | 0.494736487 | 4.36E-05 | TRBV5-6      | T cell receptor beta variable 5-6 [Source:HGNC Symbol;Acc:12223]                                                               |
| 4645 | ENSG00000183691 | 48.77715495 | 1.849033945  | 0.420274273 | 4.37E-05 | NOG          | noggin [Source:HGNC Symbol;Acc:7866]                                                                                           |
| 4646 | ENSG00000165805 | 426.7343933 | -0.710522853 | 0.161564959 | 4.41E-05 | C12orf50     | chromosome 12 open reading frame 50 [Source:HGNC Symbol;Acc:26665]                                                             |
| 4647 | ENSG00000269501 | 1750.971469 | 0.400585926  | 0.091106529 | 4.42E-05 | RP11-353N4.6 |                                                                                                                                |
| 4648 | ENSG00000114742 | 1382.941545 | 0.451438597  | 0.102678506 | 4.43E-05 | WDR48        | WD repeat domain 48 [Source:HGNC Symbol;Acc:30914]                                                                             |
| 4649 | ENSG00000147854 | 2352.88744  | 0.328380412  | 0.074696548 | 4.43E-05 | UHRF2        | ubiquitin-like with PHD and ring finger domains 2, E3 ubiquitin protein ligase [Source:HGNC Symbol;Acc:12557]                  |
| 4650 | ENSG00000182183 | 139.8455112 | 1.267260977  | 0.288305135 | 4.45E-05 | FAM159A      | family with sequence similarity 159, member A [Source:HGNC Symbol;Acc:28757]                                                   |
| 4651 | ENSG00000186329 | 219.6339105 | -0.964883627 | 0.21968299  | 4.52E-05 | TMEM212      | transmembrane protein 212 [Source:HGNC Symbol;Acc:34295]                                                                       |
| 4652 | ENSG00000144401 | 603.6445917 | -0.598580152 | 0.136311621 | 4.53E-05 | METTL21A     | methyltransferase like 21A [Source:HGNC Symbol;Acc:30476]                                                                      |
| 4653 | ENSG00000149792 | 728.3307757 | 0.5737692    | 0.130715483 | 4.57E-05 | MRPL49       | mitochondrial ribosomal protein L49 [Source:HGNC Symbol;Acc:1176]                                                              |
| 4654 | ENSG00000239951 | 307.0859413 | -0.794178303 | 0.180959994 | 4.59E-05 | IGKV3-20     | immunoglobulin kappa variable 3-20 [Source:HGNC Symbol;Acc:5817]                                                               |
| 4655 | ENSG00000123505 | 3098.595144 | 0.336807645  | 0.076746067 | 4.59E-05 | AMD1         | adenosylmethionine decarboxylase 1 [Source:HGNC Symbol;Acc:457]                                                                |
| 4656 | ENSG00000259958 | 363.7162863 | 0.731659658  | 0.166804603 | 4.63E-05 | KAT2A        | K(lysine) acetyltransferase 2A [Source:HGNC Symbol;Acc:4201]                                                                   |
| 4657 | ENSG00000137216 | 556.1598542 | -0.602592819 | 0.137383694 | 4.64E-05 | TMEM63B      | transmembrane protein 63B [Source:HGNC Symbol;Acc:17735]                                                                       |
| 4658 | ENSG00000007350 | 30.98835567 | 2.192309515  | 0.499893649 | 4.65E-05 | TKTL1        | transketolase-like 1 [Source:HGNC Symbol;Acc:11835]                                                                            |
| 4659 | ENSG00000005189 | 144.967716  | -1.169766418 | 0.266735185 | 4.65E-05 | AC004381.6   | Putative RNA exonuclease NEF-sp [Source:UniProtKB/Swiss-Prot;Acc:Q96IC2]                                                       |
| 4660 | ENSG00000157873 | 3591.112957 | 0.763911963  | 0.17419685  | 4.65E-05 | TNFRSF14     | tumor necrosis factor receptor superfamily, member 14 [Source:HGNC Symbol;Acc:11912]                                           |
| 4661 | ENSG00000120334 | 222.1100438 | -1.052867211 | 0.240203186 | 4.69E-05 | CENPL        | centromere protein L [Source:HGNC Symbol;Acc:17879]                                                                            |
| 4662 | ENSG00000184677 | 1611.617362 | 0.401505655  | 0.091623535 | 4.72E-05 | ZBTB40       | zinc finger and BTB domain containing 40 [Source:HGNC Symbol;Acc:29045]                                                        |
| 4663 | ENSG00000111731 | 1650.936039 | -0.39138751  | 0.089333491 | 4.74E-05 | C2CD5        | C2 calcium-dependent domain containing 5 [Source:HGNC Symbol;Acc:29062]                                                        |
| 4664 | ENSG00000141068 | 2438.4706   | -0.443891378 | 0.101339846 | 4.76E-05 | KSR1         | kinase suppressor of ras 1 [Source:HGNC Symbol;Acc:6465]                                                                       |
| 4665 | ENSG00000119013 | 789.8528587 | -0.532714521 | 0.121645637 | 4.78E-05 | NDUFB3       | NADH dehydrogenase (ubiquinone) 1 beta subcomplex, 3, 12kDa [Source:HGNC Symbol;Acc:7698]                                      |
| 4666 | ENSG00000170035 | 561.2355675 | 0.641716318  | 0.146536762 | 4.78E-05 | UBE2E3       | ubiquitin-conjugating enzyme E2E 3 [Source:HGNC Symbol;Acc:12479]                                                              |
| 4667 | ENSG00000142856 | 354.0177516 | -0.821045283 | 0.187580061 | 4.82E-05 | ITGB3BP      | integrin beta 3 binding protein (beta3-endonexin) [Source:HGNC Symbol;Acc:6157]                                                |
| 4668 | ENSG00000213190 | 883.698773  | 0.502193855  | 0.1147938   | 4.87E-05 | MLLT11       | myeloid/lymphoid or mixed-lineage leukemia (trithorax homolog, Drosophila); translocated to, 11 [Source:HGNC Symbol;Acc:16997] |
| 4669 | ENSG00000065491 | 541.0234139 | -0.594049    | 0.135839032 | 4.91E-05 | TBC1D22B     | TBC1 domain family, member 22B [Source:HGNC Symbol;Acc:21602]                                                                  |
| 4670 | ENSG00000182389 | 813.4010361 | 0.575664618  | 0.131680947 | 4.94E-05 | CACNB4       | calcium channel, voltage-dependent, beta 4 subunit [Source:HGNC Symbol;Acc:1404]                                               |

|      |                 |             |              |             |          |         |                                                                                                                                  |
|------|-----------------|-------------|--------------|-------------|----------|---------|----------------------------------------------------------------------------------------------------------------------------------|
| 4671 | ENSG00000161583 | 140.4032615 | -1.233283341 | 0.282153376 | 4.96E-05 | TBC1D3G | TBC1 domain family, member 3G [Source:HGNC Symbol;Acc:29860]                                                                     |
| 4672 | ENSG00000114993 | 22.60738297 | 2.283354219  | 0.522586774 | 4.99E-05 | RTKN    | rhotekin [Source:HGNC Symbol;Acc:10466]                                                                                          |
| 4673 | ENSG00000165816 | 14.62265326 | 2.459164336  | 0.562970554 | 5.02E-05 | VWA2    | von Willebrand factor A domain containing 2 [Source:HGNC Symbol;Acc:24709]                                                       |
| 4674 | ENSG00000272120 | 142.706555  | 1.113816536  | 0.255012341 | 5.03E-05 | ZNF275  | zinc finger protein 275 [Source:HGNC Symbol;Acc:13069]                                                                           |
| 4675 | ENSG00000183734 | 91.42007326 | 1.45511932   | 0.333307352 | 5.07E-05 | ASCL2   | achaete-scute family bHLH transcription factor 2 [Source:HGNC Symbol;Acc:739]                                                    |
| 4676 | ENSG00000011275 | 1663.217605 | 0.385450103  | 0.088326096 | 5.11E-05 | RNF216  | ring finger protein 216 [Source:HGNC Symbol;Acc:21698]                                                                           |
| 4677 | ENSG00000157601 | 1101.896188 | -0.478638566 | 0.109756197 | 5.18E-05 | MX1     | myxovirus (influenza virus) resistance 1, interferon-inducible protein p78 (mouse) [Source:HGNC Symbol;Acc:7532]                 |
| 4678 | ENSG00000187398 | 30.03124259 | 2.150880501  | 0.493235601 | 5.19E-05 | LUZP2   | leucine zipper protein 2 [Source:HGNC Symbol;Acc:23206]                                                                          |
| 4679 | ENSG00000163629 | 97.03598447 | 1.534421369  | 0.351906551 | 5.19E-05 | PTPN13  | protein tyrosine phosphatase, non-receptor type 13 (APO-1/CD95 (Fas)-associated phosphatase) [Source:HGNC Symbol;Acc:9646]       |
| 4680 | ENSG00000196460 | 32.17306299 | -1.974776367 | 0.452933811 | 5.20E-05 | RFX8    | RFX family member 8, lacking RFX DNA binding domain [Source:HGNC Symbol;Acc:37253]                                               |
| 4681 | ENSG00000148832 | 36.7441012  | 2.001047778  | 0.458982928 | 5.21E-05 | PAOX    | polyamine oxidase (exo-N4-amino) [Source:HGNC Symbol;Acc:20837]                                                                  |
| 4682 | ENSG00000073584 | 1867.562815 | 0.439882383  | 0.100898058 | 5.21E-05 | SMARCE1 | SWI/SNF related, matrix associated, actin dependent regulator of chromatin, subfamily e, member 1 [Source:HGNC Symbol;Acc:11109] |
| 4683 | ENSG00000170006 | 8425.380224 | -0.248530428 | 0.057010404 | 5.21E-05 | TMEM154 | transmembrane protein 154 [Source:HGNC Symbol;Acc:26489]                                                                         |
| 4684 | ENSG00000125356 | 1336.403737 | -0.429136078 | 0.098447873 | 5.22E-05 | NDUFA1  | NADH dehydrogenase (ubiquinone) 1 alpha subcomplex, 1, 7.5kDa [Source:HGNC Symbol;Acc:7683]                                      |
| 4685 | ENSG00000119535 | 100381.8722 | 0.246316582  | 0.05652408  | 5.25E-05 | CSF3R   | colony stimulating factor 3 receptor (granulocyte) [Source:HGNC Symbol;Acc:2439]                                                 |
| 4686 | ENSG00000183837 | 102.414843  | 1.573041443  | 0.360980884 | 5.25E-05 | PNMA3   | paraneoplastic Ma antigen 3 [Source:HGNC Symbol;Acc:18742]                                                                       |
| 4687 | ENSG00000164330 | 140.488019  | 1.369710286  | 0.314435842 | 5.29E-05 | EBF1    | early B-cell factor 1 [Source:HGNC Symbol;Acc:3126]                                                                              |
| 4688 | ENSG00000168137 | 3156.292838 | -0.41291918  | 0.094821194 | 5.32E-05 | SETD5   | SET domain containing 5 [Source:HGNC Symbol;Acc:25566]                                                                           |
| 4689 | ENSG00000162086 | 569.6743215 | 0.599102722  | 0.137584506 | 5.32E-05 | ZNF75A  | zinc finger protein 75a [Source:HGNC Symbol;Acc:13146]                                                                           |
| 4690 | ENSG00000183657 | 58.6594823  | -1.725765522 | 0.396419148 | 5.35E-05 | PP13439 |                                                                                                                                  |
| 4691 | ENSG00000256683 | 417.1395079 | 0.868716431  | 0.199608152 | 5.38E-05 | ZNF350  | zinc finger protein 350 [Source:HGNC Symbol;Acc:16656]                                                                           |
| 4692 | ENSG00000214655 | 4144.692555 | -0.301353973 | 0.069278233 | 5.43E-05 | ZSWIM8  | zinc finger, SWIM-type containing 8 [Source:HGNC Symbol;Acc:23528]                                                               |
| 4693 | ENSG00000152127 | 2307.368902 | -0.363646184 | 0.083603249 | 5.44E-05 | MGAT5   | mannosyl (alpha-1,6-)-glycoprotein beta-1,6-N-acetyl-glucosaminyltransferase [Source:HGNC Symbol;Acc:7049]                       |
| 4694 | ENSG00000063587 | 142.5119187 | 1.109704646  | 0.255152893 | 5.45E-05 | ZNF275  | zinc finger protein 275 [Source:HGNC Symbol;Acc:13069]                                                                           |
| 4695 | ENSG00000100196 | 52.78559909 | -1.669671292 | 0.383910642 | 5.45E-05 | KDEL3   | KDEL (Lys-Asp-Glu-Leu) endoplasmic reticulum protein retention receptor 3 [Source:HGNC Symbol;Acc:6306]                          |
| 4696 | ENSG00000138182 | 273.6175675 | -0.811288802 | 0.18655392  | 5.45E-05 | KIF20B  | kinesin family member 20B [Source:HGNC Symbol;Acc:7212]                                                                          |
| 4697 | ENSG00000007541 | 344.2946926 | -0.808450375 | 0.18591151  | 5.46E-05 | PIGQ    | phosphatidylinositol glycan anchor biosynthesis, class Q [Source:HGNC Symbol;Acc:14135]                                          |
| 4698 | ENSG00000122545 | 4276.728489 | 0.30328104   | 0.069748054 | 5.47E-05 | SEPT7   | septin 7 [Source:HGNC Symbol;Acc:1717]                                                                                           |

|      |                 |             |              |             |          |            |                                                                                               |
|------|-----------------|-------------|--------------|-------------|----------|------------|-----------------------------------------------------------------------------------------------|
| 4699 | ENSG00000174500 | 219.4853614 | 0.949306643  | 0.218340359 | 5.48E-05 | GCSAM      | germlinal center-associated, signaling and motility [Source:HGNC Symbol;Acc:20253]            |
| 4700 | ENSG00000268013 | 30.67894434 | 2.178071165  | 0.500996486 | 5.48E-05 | TKTL1      | transketolase-like 1 [Source:HGNC Symbol;Acc:11835]                                           |
| 4701 | ENSG00000161021 | 2393.740668 | -0.321009298 | 0.073868636 | 5.53E-05 | MAML1      | mastermind-like 1 (Drosophila) [Source:HGNC Symbol;Acc:13632]                                 |
| 4702 | ENSG00000151376 | 74.73113909 | 1.499649449  | 0.345174165 | 5.55E-05 | ME3        | malic enzyme 3, NADP(+)-dependent, mitochondrial [Source:HGNC Symbol;Acc:6985]                |
| 4703 | ENSG00000140829 | 1883.775848 | -0.373275486 | 0.085919893 | 5.56E-05 | DHX38      | DEAH (Asp-Glu-Ala-His) box polypeptide 38 [Source:HGNC Symbol;Acc:17211]                      |
| 4704 | ENSG00000141101 | 286.2690471 | 0.940523938  | 0.216586156 | 5.60E-05 | NOB1       | NIN1/RPN12 binding protein 1 homolog (S. cerevisiae) [Source:HGNC Symbol;Acc:29540]           |
| 4705 | ENSG00000171425 | 257.601874  | 0.851510128  | 0.196170905 | 5.65E-05 | ZNF581     | zinc finger protein 581 [Source:HGNC Symbol;Acc:25017]                                        |
| 4706 | ENSG00000104327 | 147.3834311 | -1.114751158 | 0.256841138 | 5.66E-05 | CALB1      | calbindin 1, 28kDa [Source:HGNC Symbol;Acc:1434]                                              |
| 4707 | ENSG00000113013 | 1987.298313 | 0.49820888   | 0.114809417 | 5.68E-05 | HSPA9      | heat shock 70kDa protein 9 (mortalin) [Source:HGNC Symbol;Acc:5244]                           |
| 4708 | ENSG00000125656 | 275.0744798 | 0.911443998  | 0.210086265 | 5.70E-05 | CLPP       | caseinolytic mitochondrial matrix peptidase proteolytic subunit [Source:HGNC Symbol;Acc:2084] |
| 4709 | ENSG00000126246 | 463.9346648 | 0.809257551  | 0.18664407  | 5.77E-05 | IGFLR1     | IGF-like family receptor 1 [Source:HGNC Symbol;Acc:23620]                                     |
| 4710 | ENSG00000132326 | 349.5811094 | -0.729372366 | 0.168236749 | 5.78E-05 | PER2       | period circadian clock 2 [Source:HGNC Symbol;Acc:8846]                                        |
| 4711 | ENSG00000243130 | 51.43179229 | -1.80582027  | 0.416587743 | 5.80E-05 | PSG11      | pregnancy specific beta-1-glycoprotein 11 [Source:HGNC Symbol;Acc:9516]                       |
| 4712 | ENSG00000006638 | 37.34578032 | 2.010135452  | 0.463761064 | 5.80E-05 | TBXA2R     | thromboxane A2 receptor [Source:HGNC Symbol;Acc:11608]                                        |
| 4713 | ENSG00000187741 | 437.2362623 | -0.779499693 | 0.179847134 | 5.81E-05 | FANCA      | Fanconi anemia, complementation group A [Source:HGNC Symbol;Acc:3582]                         |
| 4714 | ENSG00000163636 | 2631.576261 | -0.335313252 | 0.077364532 | 5.81E-05 | PSMD6      | proteasome (prosome, macropain) 26S subunit, non-ATPase, 6 [Source:HGNC Symbol;Acc:9564]      |
| 4715 | ENSG00000226660 | 21.82046999 | 2.290997597  | 0.528681942 | 5.83E-05 | TRBV2      | T cell receptor beta variable 2 [Source:HGNC Symbol;Acc:12195]                                |
| 4716 | ENSG00000145248 | 11.22369605 | -2.452706821 | 0.566057245 | 5.84E-05 | SLC10A4    | solute carrier family 10, member 4 [Source:HGNC Symbol;Acc:22980]                             |
| 4717 | ENSG00000089041 | 163.9185052 | 1.100604331  | 0.254080797 | 5.87E-05 | P2RX7      | purinergic receptor P2X, ligand-gated ion channel, 7 [Source:HGNC Symbol;Acc:8537]            |
| 4718 | ENSG00000142867 | 474.6736768 | 0.653627404  | 0.150926213 | 5.89E-05 | BCL10      | B-cell CLL/lymphoma 10 [Source:HGNC Symbol;Acc:989]                                           |
| 4719 | ENSG00000233264 | 66.52375495 | -1.524914538 | 0.352254465 | 5.94E-05 | AC006042.8 |                                                                                               |
| 4720 | ENSG00000122483 | 399.7080089 | -0.748331625 | 0.172910987 | 5.97E-05 | CCDC18     | coiled-coil domain containing 18 [Source:HGNC Symbol;Acc:30370]                               |
| 4721 | ENSG00000153253 | 44.17156976 | 1.850161934  | 0.427525309 | 5.97E-05 | SCN3A      | sodium channel, voltage-gated, type III, alpha subunit [Source:HGNC Symbol;Acc:10590]         |
| 4722 | ENSG00000132581 | 1182.659611 | -0.441170988 | 0.101944059 | 5.97E-05 | SDF2       | stromal cell-derived factor 2 [Source:HGNC Symbol;Acc:10675]                                  |
| 4723 | ENSG00000160789 | 186.3787899 | -1.269183946 | 0.29333242  | 6.00E-05 | LMNA       | lamin A/C [Source:HGNC Symbol;Acc:6636]                                                       |
| 4724 | ENSG00000124920 | 100.6086566 | -1.309034831 | 0.302662499 | 6.04E-05 | MYRF       | myelin regulatory factor [Source:HGNC Symbol;Acc:1181]                                        |
| 4725 | ENSG00000130300 | 24.06990481 | 2.233293905  | 0.516401101 | 6.05E-05 | PLVAP      | plasmalemma vesicle associated protein [Source:HGNC Symbol;Acc:13635]                         |
| 4726 | ENSG00000138614 | 450.8621061 | 0.651774554  | 0.150710777 | 6.05E-05 | VWA9       | von Willebrand factor A domain containing 9 [Source:HGNC Symbol;Acc:25372]                    |

|      |                 |             |              |             |          |            |                                                                                                                                  |
|------|-----------------|-------------|--------------|-------------|----------|------------|----------------------------------------------------------------------------------------------------------------------------------|
| 4727 | ENSG00000005007 | 2313.241401 | 0.424452254  | 0.098148676 | 6.05E-05 | UPF1       | UPF1 regulator of nonsense transcripts homolog (yeast) [Source:HGNC Symbol;Acc:9962]                                             |
| 4728 | ENSG00000180979 | 455.9772205 | -0.664562905 | 0.153682961 | 6.06E-05 | LRRCS7     | leucine rich repeat containing 57 [Source:HGNC Symbol;Acc:26719]                                                                 |
| 4729 | ENSG00000233828 | 226.5101207 | -0.881457302 | 0.203843249 | 6.06E-05 | AC008394.1 | Uncharacterized protein [Source:UniProtKB/TrEMBL;Acc:F5H5A5]                                                                     |
| 4730 | ENSG00000260904 | 30.13836849 | 2.109487965  | 0.487964292 | 6.09E-05 | TRBV12-3   | T cell receptor beta variable 12-3 [Source:HGNC Symbol;Acc:12185]                                                                |
| 4731 | ENSG00000178104 | 1069.849694 | 0.589169418  | 0.136305276 | 6.10E-05 | PDE4DIP    | phosphodiesterase 4D interacting protein [Source:HGNC Symbol;Acc:15580]                                                          |
| 4732 | ENSG00000257210 | 32.86781583 | -1.995022012 | 0.461585326 | 6.11E-05 | NACAP3     | nascent-polypeptide-associated complex alpha polypeptide pseudogene 3 [Source:HGNC Symbol;Acc:49490]                             |
| 4733 | ENSG00000181031 | 59.75221997 | -1.56524317  | 0.362226595 | 6.14E-05 | RPH3AL     | rabphilin 3A-like (without C2 domains) [Source:HGNC Symbol;Acc:10296]                                                            |
| 4734 | ENSG00000268693 | 59.74949017 | -1.565156245 | 0.36222578  | 6.14E-05 | RPH3AL     | rabphilin 3A-like (without C2 domains) [Source:HGNC Symbol;Acc:10296]                                                            |
| 4735 | ENSG00000262334 | 59.74742289 | -1.5651416   | 0.362227307 | 6.14E-05 | RPH3AL     | rabphilin 3A-like (without C2 domains) [Source:HGNC Symbol;Acc:10296]                                                            |
| 4736 | ENSG00000143353 | 446.4945497 | 0.683527577  | 0.15821319  | 6.16E-05 | LYPLAL1    | lysophospholipase-like 1 [Source:HGNC Symbol;Acc:20440]                                                                          |
| 4737 | ENSG00000141582 | 899.7436777 | -0.63509537  | 0.1470289   | 6.18E-05 | CBX4       | chromobox homolog 4 [Source:HGNC Symbol;Acc:1554]                                                                                |
| 4738 | ENSG00000187257 | 1759.959779 | 0.440616597  | 0.102022968 | 6.20E-05 | RSBN1L     | round spermatid basic protein 1-like [Source:HGNC Symbol;Acc:24765]                                                              |
| 4739 | ENSG00000114812 | 488.1959071 | 0.652954349  | 0.151217793 | 6.22E-05 | VIPR1      | vasoactive intestinal peptide receptor 1 [Source:HGNC Symbol;Acc:12694]                                                          |
| 4740 | ENSG00000182195 | 48.84182013 | 1.906480909  | 0.441560727 | 6.23E-05 | LDOC1      | leucine zipper, down-regulated in cancer 1 [Source:HGNC Symbol;Acc:6548]                                                         |
| 4741 | ENSG00000205707 | 271.442156  | 0.846366162  | 0.196073007 | 6.25E-05 | LYRM5      | LYR motif containing 5 [Source:HGNC Symbol;Acc:27052]                                                                            |
| 4742 | ENSG00000104147 | 60.80164556 | -1.655713332 | 0.383579497 | 6.26E-05 | OIP5       | Opa interacting protein 5 [Source:HGNC Symbol;Acc:20300]                                                                         |
| 4743 | ENSG00000122484 | 1828.262919 | -0.39369252  | 0.091214212 | 6.27E-05 | RPAP2      | RNA polymerase II associated protein 2 [Source:HGNC Symbol;Acc:25791]                                                            |
| 4744 | ENSG00000134453 | 2354.189397 | -0.324803791 | 0.075274808 | 6.30E-05 | RBM17      | RNA binding motif protein 17 [Source:HGNC Symbol;Acc:16944]                                                                      |
| 4745 | ENSG00000151498 | 1361.446154 | -0.43729626  | 0.101390718 | 6.35E-05 | ACAD8      | acyl-CoA dehydrogenase family, member 8 [Source:HGNC Symbol;Acc:87]                                                              |
| 4746 | ENSG00000139372 | 837.2024401 | -0.513043462 | 0.118981857 | 6.38E-05 | TDG        | thymine-DNA glycosylase [Source:HGNC Symbol;Acc:11700]                                                                           |
| 4747 | ENSG00000139842 | 1484.572809 | 0.386401746  | 0.089628363 | 6.40E-05 | CUL4A      | cullin 4A [Source:HGNC Symbol;Acc:2554]                                                                                          |
| 4748 | ENSG00000119760 | 1666.235265 | -0.368018375 | 0.08536594  | 6.40E-05 | SUPT7L     | suppressor of Ty 7 ( <i>S. cerevisiae</i> )-like [Source:HGNC Symbol;Acc:30632]                                                  |
| 4749 | ENSG00000203757 | 23.76596064 | -2.178533659 | 0.505369167 | 6.41E-05 | OR6K3      | olfactory receptor, family 6, subfamily K, member 3 [Source:HGNC Symbol;Acc:15030]                                               |
| 4750 | ENSG00000224557 | 75.9655162  | -1.502030245 | 0.348501666 | 6.43E-05 | HLA-DPB2   | major histocompatibility complex, class II, DP beta 2 (pseudogene) [Source:HGNC Symbol;Acc:4941]                                 |
| 4751 | ENSG00000099956 | 653.9043439 | 0.565580484  | 0.131244185 | 6.45E-05 | SMARCB1    | SWI/SNF related, matrix associated, actin dependent regulator of chromatin, subfamily b, member 1 [Source:HGNC Symbol;Acc:11103] |
| 4752 | ENSG00000066651 | 127.360039  | 1.174869076  | 0.272788648 | 6.52E-05 | TRMT11     | tRNA methyltransferase 11 homolog ( <i>S. cerevisiae</i> ) [Source:HGNC Symbol;Acc:21080]                                        |
| 4753 | ENSG00000112249 | 526.270385  | 0.734788133  | 0.170620064 | 6.53E-05 | ASCC3      | activating signal cointegrator 1 complex subunit 3 [Source:HGNC Symbol;Acc:18697]                                                |
| 4754 | ENSG00000259803 | 21.22966134 | -2.219206285 | 0.51530685  | 6.53E-05 | SLC22A31   | solute carrier family 22, member 31 [Source:HGNC Symbol;Acc:27091]                                                               |



|      |                 |             |              |             |          |          |                                                                                |
|------|-----------------|-------------|--------------|-------------|----------|----------|--------------------------------------------------------------------------------|
| 4755 | ENSG00000158796 | 1452.66012  | -0.393676688 | 0.091425864 | 6.54E-05 | DEDD     | death effector domain containing [Source:HGNC Symbol;Acc:2755]                 |
| 4756 | ENSG00000075131 | 140.0858828 | -1.121126369 | 0.260369314 | 6.54E-05 | TIPIN    | TIMELESS interacting protein [Source:HGNC Symbol;Acc:30750]                    |
| 4757 | ENSG00000162639 | 348.6743379 | 0.770936155  | 0.179075277 | 6.57E-05 | HENMT1   | HEN1 methyltransferase homolog 1 (Arabidopsis) [Source:HGNC Symbol;Acc:26400]  |
| 4758 | ENSG00000156136 | 977.3647724 | 0.527682698  | 0.122651605 | 6.65E-05 | DCK      | deoxycytidine kinase [Source:HGNC Symbol;Acc:2704]                             |
| 4759 | ENSG00000264538 | 546.2262433 | -0.590265372 | 0.137209494 | 6.66E-05 | SUZ12P   |                                                                                |
| 4760 | ENSG00000124299 | 217.6028975 | 1.005787846  | 0.233820549 | 6.67E-05 | PEPD     | peptidase D [Source:HGNC Symbol;Acc:8840]                                      |
| 4761 | ENSG00000177239 | 1194.035184 | 0.468499541  | 0.108926256 | 6.68E-05 | MAN1B1   | mannosidase, alpha, class 1B, member 1 [Source:HGNC Symbol;Acc:6823]           |
| 4762 | ENSG00000196917 | 216.8453166 | -0.927081431 | 0.215566314 | 6.69E-05 | HCAR1    | hydroxycarboxylic acid receptor 1 [Source:HGNC Symbol;Acc:4532]                |
| 4763 | ENSG00000144381 | 2520.685166 | -0.345552153 | 0.080357914 | 6.71E-05 | HSPD1    | heat shock 60kDa protein 1 (chaperonin) [Source:HGNC Symbol;Acc:5261]          |
| 4764 | ENSG00000082438 | 103.8334998 | 1.478596505  | 0.344086878 | 6.80E-05 | COBLL1   | cordon-bleu WH2 repeat protein-like 1 [Source:HGNC Symbol;Acc:23571]           |
| 4765 | ENSG00000197057 | 122.5159283 | 1.413775284  | 0.329065111 | 6.82E-05 | DTHD1    | death domain containing 1 [Source:HGNC Symbol;Acc:37261]                       |
| 4766 | ENSG00000103415 | 1145.297892 | 0.496362276  | 0.115541562 | 6.83E-05 | HMOX2    | heme oxygenase (decycling) 2 [Source:HGNC Symbol;Acc:5014]                     |
| 4767 | ENSG00000113269 | 7099.237273 | -0.224164878 | 0.05218199  | 6.83E-05 | RNF130   | ring finger protein 130 [Source:HGNC Symbol;Acc:18280]                         |
| 4768 | ENSG00000104957 | 631.7308656 | 0.596760976  | 0.138924848 | 6.84E-05 | CCDC130  | coiled-coil domain containing 130 [Source:HGNC Symbol;Acc:28118]               |
| 4769 | ENSG00000142632 | 79.17526929 | 1.46269491   | 0.340513714 | 6.84E-05 | ARHGEF19 | Rho guanine nucleotide exchange factor (GEF) 19 [Source:HGNC Symbol;Acc:26604] |
| 4770 | ENSG00000170043 | 2101.695394 | -0.34945302  | 0.081355246 | 6.84E-05 | TRAPPC1  | trafficking protein particle complex 1 [Source:HGNC Symbol;Acc:19894]          |
| 4771 | ENSG00000143502 | 50.31857503 | 1.776786138  | 0.413820706 | 6.90E-05 | SUSD4    | sushi domain containing 4 [Source:HGNC Symbol;Acc:25470]                       |
| 4772 | ENSG00000179403 | 9.582953297 | 2.424397423  | 0.56485747  | 6.94E-05 | VWA1     | von Willebrand factor A domain containing 1 [Source:HGNC Symbol;Acc:30910]     |
| 4773 | ENSG00000104613 | 860.6935062 | 0.505074495  | 0.11770007  | 6.97E-05 | INTS10   | integrator complex subunit 10 [Source:HGNC Symbol;Acc:25548]                   |
| 4774 | ENSG00000115919 | 154.8691245 | 1.055356935  | 0.24597307  | 6.99E-05 | KYNU     | kynureninase [Source:HGNC Symbol;Acc:6469]                                     |
| 4775 | ENSG00000184007 | 7806.535894 | 0.225583119  | 0.052585127 | 7.01E-05 | PTP4A2   | protein tyrosine phosphatase type IVA, member 2 [Source:HGNC Symbol;Acc:9635]  |
| 4776 | ENSG00000105329 | 4457.48424  | -0.280576587 | 0.065448666 | 7.10E-05 | TGFB1    | transforming growth factor, beta 1 [Source:HGNC Symbol;Acc:11766]              |
| 4777 | ENSG00000183473 | 61.94670439 | 1.626896746  | 0.37952231  | 7.10E-05 | SSTR3    | somatostatin receptor 3 [Source:HGNC Symbol;Acc:11332]                         |
| 4778 | ENSG00000182979 | 296.3493964 | 0.86416524   | 0.201615274 | 7.12E-05 | MTA1     | metastasis associated 1 [Source:HGNC Symbol;Acc:7410]                          |
| 4779 | ENSG00000270410 | 296.3511625 | 0.864217302  | 0.20162971  | 7.12E-05 | MTA1     | metastasis associated 1 [Source:HGNC Symbol;Acc:7410]                          |
| 4780 | ENSG00000154845 | 4675.740787 | 0.255089833  | 0.059522541 | 7.14E-05 | PPP4R1   | protein phosphatase 4, regulatory subunit 1 [Source:HGNC Symbol;Acc:9320]      |
| 4781 | ENSG00000102996 | 43.1843638  | -1.84484539  | 0.430646302 | 7.19E-05 | MMP15    | matrix metalloproteinase 15 (membrane-inserted) [Source:HGNC Symbol;Acc:7161]  |
| 4782 | ENSG00000005436 | 270.2462241 | 0.863332867  | 0.201532387 | 7.19E-05 | GCFC2    | GC-rich sequence DNA-binding factor 2 [Source:HGNC Symbol;Acc:1317]            |

|      |                 |             |              |             |          |            |                                                                                                   |
|------|-----------------|-------------|--------------|-------------|----------|------------|---------------------------------------------------------------------------------------------------|
| 4783 | ENSG00000119139 | 343.3064142 | 0.792984952  | 0.185124586 | 7.20E-05 | TJP2       | tight junction protein 2 [Source:HGNC Symbol;Acc:11828]                                           |
| 4784 | ENSG00000160957 | 233.4440596 | -1.08995443  | 0.254492042 | 7.22E-05 | RECQL4     | RecQ protein-like 4 [Source:HGNC Symbol;Acc:9949]                                                 |
| 4785 | ENSG00000173660 | 1472.553122 | -0.401080192 | 0.093649953 | 7.22E-05 | UQCRH      | ubiquinol-cytochrome c reductase hinge protein [Source:HGNC Symbol;Acc:12590]                     |
| 4786 | ENSG00000112159 | 1528.327597 | 0.449860027  | 0.105041639 | 7.22E-05 | MDN1       | MDN1, midasin homolog (yeast) [Source:HGNC Symbol;Acc:18302]                                      |
| 4787 | ENSG00000161981 | 373.1260965 | -0.689217389 | 0.160934738 | 7.22E-05 | SNRNP25    | small nuclear ribonucleoprotein 25kDa (U11/U12) [Source:HGNC Symbol;Acc:14161]                    |
| 4788 | ENSG0000010310  | 217.368512  | -0.993697873 | 0.232083241 | 7.25E-05 | GIPR       | gastric inhibitory polypeptide receptor [Source:HGNC Symbol;Acc:4271]                             |
| 4789 | ENSG00000198408 | 13953.31954 | -0.204310792 | 0.047725421 | 7.27E-05 | MGEA5      | meningioma expressed antigen 5 (hyaluronidase) [Source:HGNC Symbol;Acc:7056]                      |
| 4790 | ENSG00000099804 | 604.8004838 | 0.575207443  | 0.134372392 | 7.28E-05 | CDC34      | cell division cycle 34 [Source:HGNC Symbol;Acc:1734]                                              |
| 4791 | ENSG00000166444 | 180.3091854 | -1.056551847 | 0.246869747 | 7.31E-05 | ST5        | suppression of tumorigenicity 5 [Source:HGNC Symbol;Acc:11350]                                    |
| 4792 | ENSG00000108278 | 397.4380984 | 0.909099387  | 0.212417365 | 7.31E-05 | ZNHIT3     | zinc finger, HIT-type containing 3 [Source:HGNC Symbol;Acc:12309]                                 |
| 4793 | ENSG00000184436 | 153.7504314 | 1.107115473  | 0.258714959 | 7.32E-05 | THAP7      | THAP domain containing 7 [Source:HGNC Symbol;Acc:23190]                                           |
| 4794 | ENSG00000133112 | 67442.70814 | 0.205375734  | 0.048001201 | 7.34E-05 | TPT1       | tumor protein, translationally-controlled 1 [Source:HGNC Symbol;Acc:12022]                        |
| 4795 | ENSG00000262489 | 58.17466759 | 1.700864878  | 0.397608722 | 7.37E-05 | RRAS2      | related RAS viral (r-ras) oncogene homolog 2 [Source:HGNC Symbol;Acc:17271]                       |
| 4796 | ENSG00000128805 | 80.06671191 | -1.425358402 | 0.333246568 | 7.39E-05 | ARHGAP22   | Rho GTPase activating protein 22 [Source:HGNC Symbol;Acc:30320]                                   |
| 4797 | ENSG00000185436 | 65.03848109 | 1.580161287  | 0.369448394 | 7.39E-05 | IFNLR1     | interferon, lambda receptor 1 [Source:HGNC Symbol;Acc:18584]                                      |
| 4798 | ENSG00000006282 | 405.0650946 | 0.759073387  | 0.177479679 | 7.39E-05 | SPATA20    | spermatogenesis associated 20 [Source:HGNC Symbol;Acc:26125]                                      |
| 4799 | ENSG00000173369 | 21.14518687 | -2.227886681 | 0.520908584 | 7.39E-05 | C1QB       | complement component 1, q subcomponent, B chain [Source:HGNC Symbol;Acc:1242]                     |
| 4800 | ENSG00000165424 | 145.5794928 | -1.081194281 | 0.25283932  | 7.41E-05 | ZCCHC24    | zinc finger, CCHC domain containing 24 [Source:HGNC Symbol;Acc:26911]                             |
| 4801 | ENSG00000121892 | 2058.585112 | 0.356873749  | 0.083463859 | 7.42E-05 | PDS5A      | PDS5, regulator of cohesion maintenance, homolog A (S. cerevisiae) [Source:HGNC Symbol;Acc:29088] |
| 4802 | ENSG00000256667 | 157.1508544 | 1.065050043  | 0.249106262 | 7.43E-05 | KLRAP1     | killer cell lectin-like receptor subfamily A pseudogene 1 [Source:HGNC Symbol;Acc:6372]           |
| 4803 | ENSG00000186716 | 983.8769529 | 0.630649867  | 0.14756699  | 7.49E-05 | BCR        | breakpoint cluster region [Source:HGNC Symbol;Acc:1014]                                           |
| 4804 | ENSG00000198198 | 2272.576816 | -0.337986413 | 0.079116484 | 7.55E-05 | SZT2       | seizure threshold 2 homolog (mouse) [Source:HGNC Symbol;Acc:29040]                                |
| 4805 | ENSG00000163001 | 291.2441456 | 0.780695797  | 0.1827806   | 7.57E-05 | CCDC104    | coiled-coil domain containing 104 [Source:HGNC Symbol;Acc:30540]                                  |
| 4806 | ENSG00000260164 | 218.0985147 | -1.014204578 | 0.237472044 | 7.58E-05 | MYO19      | myosin XIX [Source:HGNC Symbol;Acc:26234]                                                         |
| 4807 | ENSG00000151465 | 1628.362245 | 0.377753381  | 0.088452858 | 7.59E-05 | CDC123     | cell division cycle 123 [Source:HGNC Symbol;Acc:16827]                                            |
| 4808 | ENSG00000242013 | 56.55681973 | 1.666289525  | 0.390237005 | 7.61E-05 | USP27X     | ubiquitin specific peptidase 27, X-linked [Source:HGNC Symbol;Acc:13486]                          |
| 4809 | ENSG00000170468 | 169.0264323 | 1.005713421  | 0.235583027 | 7.64E-05 | AC005280.1 |                                                                                                   |
| 4810 | ENSG00000076108 | 5901.792362 | 0.287871472  | 0.067440787 | 7.66E-05 | BAZ2A      | bromodomain adjacent to zinc finger domain, 2A [Source:HGNC Symbol;Acc:962]                       |

|      |                 |             |              |             |          |               |                                                                                                               |
|------|-----------------|-------------|--------------|-------------|----------|---------------|---------------------------------------------------------------------------------------------------------------|
| 4811 | ENSG00000219448 | 410.7156175 | -0.681317514 | 0.159725354 | 7.76E-05 | RP11-193H22.2 |                                                                                                               |
| 4812 | ENSG00000178033 | 163.5431167 | 1.042124107  | 0.244339149 | 7.77E-05 | FAM26E        | family with sequence similarity 26, member E [Source:HGNC Symbol;Acc:21568]                                   |
| 4813 | ENSG00000184988 | 245.115195  | 0.845201345  | 0.198169952 | 7.77E-05 | TMEM106A      | transmembrane protein 106A [Source:HGNC Symbol;Acc:28288]                                                     |
| 4814 | ENSG00000118402 | 24.5594313  | 2.240493351  | 0.525339981 | 7.78E-05 | ELOVL4        | ELOVL fatty acid elongase 4 [Source:HGNC Symbol;Acc:14415]                                                    |
| 4815 | ENSG00000163069 | 54.13327191 | 1.767894993  | 0.414658529 | 7.82E-05 | SGCB          | sarcoglycan, beta (43kDa dystrophin-associated glycoprotein) [Source:HGNC Symbol;Acc:10806]                   |
| 4816 | ENSG00000089060 | 1261.81801  | -0.435921545 | 0.102272567 | 7.86E-05 | SLC8B1        | solute carrier family 8 (sodium/lithium/calcium exchanger), member B1 [Source:HGNC Symbol;Acc:26175]          |
| 4817 | ENSG00000160803 | 568.8250717 | 0.745169821  | 0.174883875 | 7.91E-05 | UBQLN4        | ubiquilin 4 [Source:HGNC Symbol;Acc:1237]                                                                     |
| 4818 | ENSG00000215301 | 10826.44888 | 0.208370624  | 0.048905524 | 7.92E-05 | DDX3X         | DEAD (Asp-Glu-Ala-Asp) box helicase 3, X-linked [Source:HGNC Symbol;Acc:2745]                                 |
| 4819 | ENSG00000262826 | 1622.97614  | -0.385009581 | 0.090369527 | 7.92E-05 | INTS3         | integrator complex subunit 3 [Source:HGNC Symbol;Acc:26153]                                                   |
| 4820 | ENSG00000074855 | 119.563579  | 1.240097878  | 0.291307819 | 8.04E-05 | ANO8          | anoctamin 8 [Source:HGNC Symbol;Acc:29329]                                                                    |
| 4821 | ENSG00000164096 | 2275.504671 | 0.329315718  | 0.077366742 | 8.06E-05 | C4orf3        | chromosome 4 open reading frame 3 [Source:HGNC Symbol;Acc:19225]                                              |
| 4822 | ENSG00000211790 | 25.448414   | 2.226438738  | 0.523299334 | 8.13E-05 | TRAV8-4       | T cell receptor alpha variable 8-4 [Source:HGNC Symbol;Acc:12149]                                             |
| 4823 | ENSG00000196209 | 2818.493542 | -0.328021266 | 0.077100542 | 8.13E-05 | SIRPB2        | signal-regulatory protein beta 2 [Source:HGNC Symbol;Acc:16247]                                               |
| 4824 | ENSG00000125952 | 4284.157093 | -0.25665478  | 0.060334669 | 8.15E-05 | MAX           | MYC associated factor X [Source:HGNC Symbol;Acc:6913]                                                         |
| 4825 | ENSG00000164620 | 99.25756855 | 1.316150488  | 0.309404678 | 8.15E-05 | RELL2         | RELT-like 2 [Source:HGNC Symbol;Acc:26902]                                                                    |
| 4826 | ENSG00000143891 | 477.6399487 | -0.623092441 | 0.146486853 | 8.16E-05 | GALM          | galactose mutarotase (aldose 1-epimerase) [Source:HGNC Symbol;Acc:24063]                                      |
| 4827 | ENSG00000166897 | 78.84608259 | 2.411479497  | 0.566939677 | 8.16E-05 | ELFN2         | extracellular leucine-rich repeat and fibronectin type III domain containing 2 [Source:HGNC Symbol;Acc:29396] |
| 4828 | ENSG00000268548 | 2344.504127 | -0.325622139 | 0.076567914 | 8.19E-05 | TPI1          | triosephosphate isomerase 1 [Source:HGNC Symbol;Acc:12009]                                                    |
| 4829 | ENSG00000136868 | 592.199846  | -0.666415158 | 0.156760702 | 8.24E-05 | SLC31A1       | solute carrier family 31 (copper transporter), member 1 [Source:HGNC Symbol;Acc:11016]                        |
| 4830 | ENSG00000185963 | 2432.991604 | -0.322194823 | 0.07579253  | 8.25E-05 | BICD2         | bicaudal D homolog 2 (Drosophila) [Source:HGNC Symbol;Acc:17208]                                              |
| 4831 | ENSG00000116977 | 2041.48231  | -0.42376112  | 0.099701963 | 8.27E-05 | LGALS8        | lectin, galactoside-binding, soluble, 8 [Source:HGNC Symbol;Acc:6569]                                         |
| 4832 | ENSG00000130508 | 37.72018809 | 1.930457544  | 0.454309681 | 8.31E-05 | PXDN          | peroxidasin homolog (Drosophila) [Source:HGNC Symbol;Acc:14966]                                               |
| 4833 | ENSG00000214967 | 351.6740787 | 0.739835161  | 0.174118081 | 8.31E-05 | NPIPA7        | nuclear pore complex interacting protein family, member A7 [Source:HGNC Symbol;Acc:41982]                     |
| 4834 | ENSG00000214253 | 808.9250887 | 0.529509169  | 0.124620239 | 8.31E-05 | FIS1          | fission 1 (mitochondrial outer membrane) homolog (S. cerevisiae) [Source:HGNC Symbol;Acc:21689]               |
| 4835 | ENSG00000149100 | 1825.978624 | 0.390186496  | 0.091899275 | 8.43E-05 | EIF3M         | eukaryotic translation initiation factor 3, subunit M [Source:HGNC Symbol;Acc:24460]                          |
| 4836 | ENSG00000100031 | 614.8134709 | -0.63164644  | 0.148813607 | 8.48E-05 | GGT1          | gamma-glutamyltransferase 1 [Source:HGNC Symbol;Acc:4250]                                                     |
| 4837 | ENSG00000163655 | 878.4061952 | -0.567729907 | 0.133770032 | 8.49E-05 | GMPS          | guanine monphosphate synthase [Source:HGNC Symbol;Acc:4378]                                                   |
| 4838 | ENSG00000165152 | 8.72004035  | -2.396934053 | 0.564812311 | 8.50E-05 | TMEM246       | transmembrane protein 246 [Source:HGNC Symbol;Acc:28180]                                                      |

|      |                 |             |              |             |          |                  |                                                                                                     |
|------|-----------------|-------------|--------------|-------------|----------|------------------|-----------------------------------------------------------------------------------------------------|
| 4839 | ENSG00000211810 | 32.63966213 | 2.027296257  | 0.477903491 | 8.57E-05 | TRAV29DV5        | T cell receptor alpha variable 29/delta variable 5 (gene/pseudogene) [Source:HGNC Symbol;Acc:12127] |
| 4840 | ENSG00000258164 | 88.89594615 | -1.320301298 | 0.311371012 | 8.63E-05 | AL845454.1       |                                                                                                     |
| 4841 | ENSG00000243279 | 498.8710824 | 0.636198364  | 0.150055348 | 8.65E-05 | PRAF2            | PRA1 domain family, member 2 [Source:HGNC Symbol;Acc:28911]                                         |
| 4842 | ENSG00000268440 | 526.2966207 | -0.79813804  | 0.188303771 | 8.69E-05 | VBP1             | von Hippel-Lindau binding protein 1 [Source:HGNC Symbol;Acc:12662]                                  |
| 4843 | ENSG00000072778 | 5268.899767 | -0.252111072 | 0.059480534 | 8.69E-05 | ACADVL           | acyl-CoA dehydrogenase, very long chain [Source:HGNC Symbol;Acc:92]                                 |
| 4844 | ENSG00000065427 | 1575.119462 | 0.389045527  | 0.091806692 | 8.73E-05 | KARS             | lysyl-tRNA synthetase [Source:HGNC Symbol;Acc:6215]                                                 |
| 4845 | ENSG00000141873 | 344.7264802 | -0.734552001 | 0.173378933 | 8.76E-05 | SLC39A3          | solute carrier family 39 (zinc transporter), member 3 [Source:HGNC Symbol;Acc:17128]                |
| 4846 | ENSG00000176809 | 235.3796978 | -0.887875425 | 0.20958133  | 8.77E-05 | LRRC37A3         | leucine rich repeat containing 37, member A3 [Source:HGNC Symbol;Acc:32427]                         |
| 4847 | ENSG00000165006 | 2258.27917  | -0.344032116 | 0.081213403 | 8.78E-05 | UBAP1            | ubiquitin associated protein 1 [Source:HGNC Symbol;Acc:12461]                                       |
| 4848 | ENSG00000102393 | 359.2659293 | -0.707972992 | 0.167202731 | 8.85E-05 | GLA              | galactosidase, alpha [Source:HGNC Symbol;Acc:4296]                                                  |
| 4849 | ENSG00000172732 | 1091.113955 | -0.486280088 | 0.114865791 | 8.88E-05 | MUS81            | MUS81 structure-specific endonuclease subunit [Source:HGNC Symbol;Acc:29814]                        |
| 4850 | ENSG00000268815 | 359.1250835 | -0.707869207 | 0.167215936 | 8.89E-05 | GLA              | galactosidase, alpha [Source:HGNC Symbol;Acc:4296]                                                  |
| 4851 | ENSG00000217275 | 77.01907727 | -1.412503706 | 0.333804879 | 8.95E-05 | RP1-34B20.4      |                                                                                                     |
| 4852 | ENSG00000197846 | 118.8454329 | -1.202298872 | 0.284215702 | 9.00E-05 | HIST1H2BF        | histone cluster 1, H2bf [Source:HGNC Symbol;Acc:4752]                                               |
| 4853 | ENSG00000214022 | 1266.562087 | 0.426601015  | 0.100903443 | 9.10E-05 | REPIN1           | replication initiator 1 [Source:HGNC Symbol;Acc:17922]                                              |
| 4854 | ENSG00000213901 | 129.7106922 | -1.111562499 | 0.262934853 | 9.11E-05 | SLC23A3          | solute carrier family 23, member 3 [Source:HGNC Symbol;Acc:20601]                                   |
| 4855 | ENSG00000153044 | 138.2779755 | -1.112549153 | 0.26338001  | 9.25E-05 | CENPH            | centromere protein H [Source:HGNC Symbol;Acc:17268]                                                 |
| 4856 | ENSG00000136816 | 1019.416573 | -0.454100714 | 0.10752619  | 9.28E-05 | TOR1B            | torsin family 1, member B (torsin B) [Source:HGNC Symbol;Acc:11995]                                 |
| 4857 | ENSG00000119403 | 862.991993  | -0.572553155 | 0.135600595 | 9.32E-05 | PHF19            | PHD finger protein 19 [Source:HGNC Symbol;Acc:24566]                                                |
| 4858 | ENSG00000174348 | 39.19682633 | 1.991903918  | 0.471789696 | 9.33E-05 | PODN             | podocan [Source:HGNC Symbol;Acc:23174]                                                              |
| 4859 | ENSG00000188340 | 31.88574805 | -1.941651161 | 0.45995868  | 9.35E-05 | OR6N2            | olfactory receptor, family 6, subfamily N, member 2 [Source:HGNC Symbol;Acc:15035]                  |
| 4860 | ENSG00000197782 | 837.6595609 | -0.677129159 | 0.160405942 | 9.35E-05 | ZNF780A          | zinc finger protein 780A [Source:HGNC Symbol;Acc:27603]                                             |
| 4861 | ENSG00000196465 | 180.3763189 | 0.950189635  | 0.225126627 | 9.38E-05 | MYL6B            | myosin, light chain 6B, alkali, smooth muscle and non-muscle [Source:HGNC Symbol;Acc:29823]         |
| 4862 | ENSG00000137364 | 408.5209426 | -0.661676055 | 0.156777065 | 9.38E-05 | TPMT             | thiopurine S-methyltransferase [Source:HGNC Symbol;Acc:12014]                                       |
| 4863 | ENSG00000060642 | 25.21249959 | -2.263415797 | 0.536476346 | 9.44E-05 | TMEM98           | transmembrane protein 98 [Source:HGNC Symbol;Acc:24529]                                             |
| 4864 | ENSG00000204422 | 24.07073067 | 2.322211641  | 0.550504188 | 9.47E-05 | XXbac-BPG32J3.20 | Uncharacterized protein [Source:UniProtKB/TrEMBL;Acc:U3KQA8]                                        |
| 4865 | ENSG00000111669 | 2341.513649 | -0.321999648 | 0.076351483 | 9.51E-05 | TPI1             | triosephosphate isomerase 1 [Source:HGNC Symbol;Acc:12009]                                          |
| 4866 | ENSG00000154781 | 587.2876151 | 0.636677577  | 0.151005203 | 9.55E-05 | CCDC174          | coiled-coil domain containing 174 [Source:HGNC Symbol;Acc:28033]                                    |

|      |                 |             |              |             |             |          |                                                                                                          |
|------|-----------------|-------------|--------------|-------------|-------------|----------|----------------------------------------------------------------------------------------------------------|
| 4867 | ENSG00000147874 | 698.4669921 | -0.536117704 | 0.127162562 | 9.56E-05    | HAUS6    | HAUS augmin-like complex, subunit 6 [Source:HGNC Symbol;Acc:25948]                                       |
| 4868 | ENSG00000114850 | 1265.486462 | -0.455610855 | 0.1080703   | 9.57E-05    | SSR3     | signal sequence receptor, gamma (translocon-associated protein gamma) [Source:HGNC Symbol;Acc:11325]     |
| 4869 | ENSG00000148468 | 42.25273552 | 1.904141986  | 0.451845036 | 9.64E-05    | FAM171A1 | family with sequence similarity 171, member A1 [Source:HGNC Symbol;Acc:23522]                            |
| 4870 | ENSG00000204842 | 860.3455903 | -0.548720689 | 0.130265889 | 9.71E-05    | ATXN2    | ataxin 2 [Source:HGNC Symbol;Acc:10555]                                                                  |
| 4871 | ENSG00000249931 | 42.54977758 | -1.888888335 | 0.448552831 | 9.76E-05    | GOLGA8K  | golgin A8 family, member K [Source:HGNC Symbol;Acc:38652]                                                |
| 4872 | ENSG00000112493 | 330.3100625 | 1.137735271  | 0.270293832 | 9.84E-05    | TAPBP    | TAP binding protein (tapasin) [Source:HGNC Symbol;Acc:11566]                                             |
| 4873 | ENSG00000225345 | 86.68110627 | -1.356555086 | 0.322423863 | 9.92E-05    | SNX18P3  | sorting nexin 18 pseudogene 3 [Source:HGNC Symbol;Acc:39611]                                             |
| 4874 | ENSG00000105281 | 593.0802476 | -0.562395226 | 0.133678935 | 9.93E-05    | SLC1A5   | solute carrier family 1 (neutral amino acid transporter), member 5 [Source:HGNC Symbol;Acc:10943]        |
| 4875 | ENSG00000255423 | 197.5446236 | -0.915297058 | 0.217622078 | 9.98E-05    | EBLN2    | endogenous Bornavirus-like nucleoprotein 2 [Source:HGNC Symbol;Acc:25493]                                |
| 4876 | ENSG00000101367 | 2396.773361 | -0.335111341 | 0.079688657 | 0.000100089 | MAPRE1   | microtubule-associated protein, RP/EB family, member 1 [Source:HGNC Symbol;Acc:6890]                     |
| 4877 | ENSG00000174669 | 81.2916414  | 1.398820276  | 0.332642789 | 0.000100106 | SLC29A2  | solute carrier family 29 (equilibrative nucleoside transporter), member 2 [Source:HGNC Symbol;Acc:11004] |
| 4878 | ENSG00000173597 | 3333.88782  | -0.377304812 | 0.089753123 | 0.000100691 | SULT1B1  | sulfotransferase family, cytosolic, 1B, member 1 [Source:HGNC Symbol;Acc:17845]                          |
| 4879 | ENSG00000175348 | 768.8519873 | 0.506098191  | 0.120422783 | 0.000101155 | TMEM9B   | TMEM9 domain family, member B [Source:HGNC Symbol;Acc:1168]                                              |
| 4880 | ENSG00000225663 | 353.0954232 | 0.843549036  | 0.200717903 | 0.000101155 | FAM195B  | family with sequence similarity 195, member B [Source:HGNC Symbol;Acc:28007]                             |
| 4881 | ENSG00000094755 | 328.36498   | -0.743985551 | 0.177028631 | 0.000101155 | GABRP    | gamma-aminobutyric acid (GABA) A receptor, pi [Source:HGNC Symbol;Acc:4089]                              |
| 4882 | ENSG00000263071 | 22.74742742 | -2.130356989 | 0.50699052  | 0.00010141  | CFL1P5   | cofilin 1 (non-muscle) pseudogene 5 [Source:HGNC Symbol;Acc:1877]                                        |
| 4883 | ENSG00000213830 | 22.74742742 | -2.130356989 | 0.50699052  | 0.00010141  | CFL1P5   | cofilin 1 (non-muscle) pseudogene 5 [Source:HGNC Symbol;Acc:1877]                                        |
| 4884 | ENSG00000131043 | 389.0907583 | 0.694110188  | 0.165213266 | 0.000101689 | AAR2     | AAR2 splicing factor homolog ( <i>S. cerevisiae</i> ) [Source:HGNC Symbol;Acc:15886]                     |
| 4885 | ENSG00000246223 | 117.4903419 | 1.197915249  | 0.285153308 | 0.000101824 | C14orf64 | chromosome 14 open reading frame 64 [Source:HGNC Symbol;Acc:20111]                                       |
| 4886 | ENSG00000135124 | 529.5424698 | 0.607397572  | 0.144662053 | 0.000102805 | P2RX4    | purinergic receptor P2X, ligand-gated ion channel, 4 [Source:HGNC Symbol;Acc:8535]                       |
| 4887 | ENSG00000211795 | 34.51481045 | 2.027120349  | 0.483030808 | 0.000103725 | TRAV8-6  | T cell receptor alpha variable 8-6 [Source:HGNC Symbol;Acc:12151]                                        |
| 4888 | ENSG00000065057 | 57.10702403 | 1.610257394  | 0.383726314 | 0.000103841 | NTHL1    | nth endonuclease III-like 1 ( <i>E. coli</i> ) [Source:HGNC Symbol;Acc:8028]                             |
| 4889 | ENSG00000243612 | 21.38819851 | 2.310442313  | 0.550659345 | 0.000104093 | HLA-DOB  | major histocompatibility complex, class II, DO beta [Source:HGNC Symbol;Acc:4937]                        |
| 4890 | ENSG00000101463 | 9.052500961 | 2.357155658  | 0.561836429 | 0.000104221 | SYNDIG1  | synapse differentiation inducing 1 [Source:HGNC Symbol;Acc:15885]                                        |
| 4891 | ENSG00000197217 | 2451.214915 | 0.334993364  | 0.079859683 | 0.00010451  | ENTPD4   | ectonucleoside triphosphate diphosphohydrolase 4 [Source:HGNC Symbol;Acc:14573]                          |
| 4892 | ENSG00000197880 | 57.43592979 | 1.650955165  | 0.393578907 | 0.000104512 | MDS2     | myelodysplastic syndrome 2 translocation associated [Source:HGNC Symbol;Acc:29633]                       |
| 4893 | ENSG00000260204 | 53.01143869 | 1.745585306  | 0.416226251 | 0.0001049   | TRBV18   | T cell receptor beta variable 18 [Source:HGNC Symbol;Acc:12193]                                          |
| 4894 | ENSG00000143520 | 33.86310591 | 1.968057907  | 0.46935947  | 0.000105234 | FLG2     | filaggrin family member 2 [Source:HGNC Symbol;Acc:33276]                                                 |

|      |                 |             |              |             |             |            |                                                                                                                     |
|------|-----------------|-------------|--------------|-------------|-------------|------------|---------------------------------------------------------------------------------------------------------------------|
| 4895 | ENSG00000214046 | 976.9286403 | -0.437057774 | 0.104236439 | 0.00010527  | SMIM7      | small integral membrane protein 7 [Source:HGNC Symbol;Acc:28419]                                                    |
| 4896 | ENSG00000011114 | 965.3896929 | -0.518267587 | 0.12360597  | 0.00010527  | BTBD7      | BTB (POZ) domain containing 7 [Source:HGNC Symbol;Acc:18269]                                                        |
| 4897 | ENSG00000106123 | 351.7777823 | 0.846062197  | 0.201800915 | 0.000105407 | EPHB6      | EPH receptor B6 [Source:HGNC Symbol;Acc:3396]                                                                       |
| 4898 | ENSG00000240583 | 65.30164403 | -1.638298213 | 0.390795084 | 0.000105544 | AQP1       | aquaporin 1 (Colton blood group) [Source:HGNC Symbol;Acc:633]                                                       |
| 4899 | ENSG00000083814 | 461.8354082 | 0.637530061  | 0.152184483 | 0.00010694  | ZNF671     | zinc finger protein 671 [Source:HGNC Symbol;Acc:26279]                                                              |
| 4900 | ENSG00000118855 | 1982.707173 | -0.362895577 | 0.086637175 | 0.000107158 | MFSD1      | major facilitator superfamily domain containing 1 [Source:HGNC Symbol;Acc:25874]                                    |
| 4901 | ENSG00000078699 | 1191.613552 | -0.405600253 | 0.096906013 | 0.000108648 | CBFA2T2    | core-binding factor, runt domain, alpha subunit 2; translocated to, 2 [Source:HGNC Symbol;Acc:1536]                 |
| 4902 | ENSG00000177917 | 537.8617947 | -0.603694454 | 0.144250643 | 0.000108847 | ARL6IP6    | ADP-ribosylation-like factor 6 interacting protein 6 [Source:HGNC Symbol;Acc:24048]                                 |
| 4903 | ENSG00000231939 | 14.29827808 | 2.342954162  | 0.560075429 | 0.000109666 | HLA-DQB1   | major histocompatibility complex, class II, DQ beta 1 [Source:HGNC Symbol;Acc:4944]                                 |
| 4904 | ENSG00000131504 | 7733.49378  | -0.214711907 | 0.051326686 | 0.000109666 | DIAPH1     | diaphanous-related formin 1 [Source:HGNC Symbol;Acc:2876]                                                           |
| 4905 | ENSG00000171298 | 1327.80055  | 0.567838564  | 0.135742733 | 0.000109666 | GAA        | glucosidase, alpha; acid [Source:HGNC Symbol;Acc:4065]                                                              |
| 4906 | ENSG00000270629 | 758.8194962 | 0.541056397  | 0.129363994 | 0.000110012 | AC239811.2 | Neuroblastoma breakpoint family member 1 [Source:UniProtKB/TrEMBL;Acc:S4R3H5]                                       |
| 4907 | ENSG00000211898 | 138.418492  | 1.426541455  | 0.341293132 | 0.000111265 | IGHD       | immunoglobulin heavy constant delta [Source:HGNC Symbol;Acc:5480]                                                   |
| 4908 | ENSG00000211799 | 38.36034457 | 1.93696396   | 0.46358842  | 0.000112036 | TRAV19     | T cell receptor alpha variable 19 [Source:HGNC Symbol;Acc:12115]                                                    |
| 4909 | ENSG00000125520 | 409.2308199 | 0.759432667  | 0.181816773 | 0.000112645 | SLC2A4RG   | SLC2A4 regulator [Source:HGNC Symbol;Acc:15930]                                                                     |
| 4910 | ENSG00000250462 | 1052.846657 | -0.443816525 | 0.106255737 | 0.000112645 | LRRC37BP1  | leucine rich repeat containing 37B pseudogene 1 [Source:HGNC Symbol;Acc:25390]                                      |
| 4911 | ENSG00000144659 | 596.8895466 | 0.555801576  | 0.133079945 | 0.000112831 | SLC25A38   | solute carrier family 25, member 38 [Source:HGNC Symbol;Acc:26054]                                                  |
| 4912 | ENSG00000198707 | 363.9931643 | 0.733315853  | 0.175609195 | 0.00011311  | CEP290     | centrosomal protein 290kDa [Source:HGNC Symbol;Acc:29021]                                                           |
| 4913 | ENSG00000134278 | 84.86153352 | -1.431920881 | 0.34294425  | 0.000113318 | SPIRE1     | spire-type actin nucleation factor 1 [Source:HGNC Symbol;Acc:30622]                                                 |
| 4914 | ENSG00000115112 | 37.00362943 | -1.843244988 | 0.441504787 | 0.000113524 | TFCP2L1    | transcription factor CP2-like 1 [Source:HGNC Symbol;Acc:17925]                                                      |
| 4915 | ENSG00000111906 | 371.6332607 | 0.703140555  | 0.168461564 | 0.000114012 | HDDC2      | HD domain containing 2 [Source:HGNC Symbol;Acc:21078]                                                               |
| 4916 | ENSG00000141551 | 4396.87949  | 0.313676921  | 0.075160622 | 0.000114225 | CSNK1D     | casein kinase 1, delta [Source:HGNC Symbol;Acc:2452]                                                                |
| 4917 | ENSG00000160602 | 130.1539717 | 1.150048036  | 0.275580424 | 0.000114321 | NEK8       | NIMA-related kinase 8 [Source:HGNC Symbol;Acc:13387]                                                                |
| 4918 | ENSG00000101745 | 2941.791396 | 0.300703416  | 0.072061847 | 0.000114465 | ANKRD12    | ankyrin repeat domain 12 [Source:HGNC Symbol;Acc:29135]                                                             |
| 4919 | ENSG00000187997 | 31.88592902 | -1.892162694 | 0.453461874 | 0.000114515 | C17orf99   | chromosome 17 open reading frame 99 [Source:HGNC Symbol;Acc:34490]                                                  |
| 4920 | ENSG00000115762 | 2203.010071 | 0.318785406  | 0.076416458 | 0.000115006 | PLEKHB2    | pleckstrin homology domain containing, family B (evectins) member 2 [Source:HGNC Symbol;Acc:19236]                  |
| 4921 | ENSG00000129460 | 436.1775586 | 0.664508538  | 0.159303879 | 0.000115163 | NGDN       | neuroguidin, EIF4E binding protein [Source:HGNC Symbol;Acc:20271]                                                   |
| 4922 | ENSG00000134899 | 2221.732469 | 0.335684798  | 0.080493176 | 0.000115622 | ERCC5      | excision repair cross-complementing rodent repair deficiency, complementation group 5 [Source:HGNC Symbol;Acc:3437] |

|      |                 |             |              |             |             |               |                                                                                                    |
|------|-----------------|-------------|--------------|-------------|-------------|---------------|----------------------------------------------------------------------------------------------------|
| 4923 | ENSG00000205639 | 85.49200809 | -1.369636559 | 0.328424158 | 0.000115622 | MFSD2B        | major facilitator superfamily domain containing 2B [Source:HGNC Symbol;Acc:37207]                  |
| 4924 | ENSG00000184787 | 1100.236538 | 0.419646566  | 0.100661618 | 0.000116334 | UBE2G2        | ubiquitin-conjugating enzyme E2G 2 [Source:HGNC Symbol;Acc:12483]                                  |
| 4925 | ENSG00000136141 | 336.3969194 | 0.735451857  | 0.176464382 | 0.000116912 | LRCH1         | leucine-rich repeats and calponin homology (CH) domain containing 1 [Source:HGNC Symbol;Acc:20309] |
| 4926 | ENSG00000171320 | 101.2973265 | -1.243979446 | 0.298519754 | 0.000117169 | ESCO2         | establishment of sister chromatid cohesion N-acetyltransferase 2 [Source:HGNC Symbol;Acc:27230]    |
| 4927 | ENSG00000270911 | 45.93754645 | -1.697180445 | 0.407369527 | 0.000117642 | RP11-272L13.4 |                                                                                                    |
| 4928 | ENSG00000198912 | 694.2861014 | 0.52827239   | 0.126806814 | 0.000117738 | C1orf174      | chromosome 1 open reading frame 174 [Source:HGNC Symbol;Acc:27915]                                 |
| 4929 | ENSG00000136603 | 653.1275224 | -0.528540337 | 0.126872653 | 0.00011774  | SKIL          | SKI-like oncogene [Source:HGNC Symbol;Acc:10897]                                                   |
| 4930 | ENSG00000052841 | 2085.893303 | -0.371799529 | 0.089286933 | 0.000118656 | TTC17         | tetratricopeptide repeat domain 17 [Source:HGNC Symbol;Acc:25596]                                  |
| 4931 | ENSG00000211788 | 49.67380355 | 1.736273095  | 0.41700596  | 0.000118857 | TRAV13-1      | T cell receptor alpha variable 13-1 [Source:HGNC Symbol;Acc:12108]                                 |
| 4932 | ENSG00000260105 | 50.33822118 | -1.74009007  | 0.417971511 | 0.000119086 | AOC4P         | amine oxidase, copper containing 4, pseudogene [Source:HGNC Symbol;Acc:48869]                      |
| 4933 | ENSG00000196876 | 119.9284404 | -1.241606458 | 0.298281565 | 0.0001194   | SCN8A         | sodium channel, voltage gated, type VIII, alpha subunit [Source:HGNC Symbol;Acc:10596]             |
| 4934 | ENSG00000176619 | 424.0401131 | -0.692205268 | 0.166308391 | 0.000119561 | LMNB2         | lamin B2 [Source:HGNC Symbol;Acc:6638]                                                             |
| 4935 | ENSG00000272773 | 1099.92913  | 0.418799607  | 0.100626395 | 0.000119669 | UBE2G2        | ubiquitin-conjugating enzyme E2G 2 [Source:HGNC Symbol;Acc:12483]                                  |
| 4936 | ENSG00000172460 | 28.63404581 | 2.062824297  | 0.495682135 | 0.000119823 | PRSS30P       | protease, serine, 30, pseudogene [Source:HGNC Symbol;Acc:28753]                                    |
| 4937 | ENSG00000133740 | 208.4837753 | 0.969906906  | 0.233074008 | 0.000119913 | E2F5          | E2F transcription factor 5, p130-binding [Source:HGNC Symbol;Acc:3119]                             |
| 4938 | ENSG00000141497 | 58.45226909 | 1.805270266  | 0.433835777 | 0.000119986 | ZMYND15       | zinc finger, MYND-type containing 15 [Source:HGNC Symbol;Acc:20997]                                |
| 4939 | ENSG00000165115 | 402.1619736 | 0.709423586  | 0.170499689 | 0.000120137 | KIF27         | kinesin family member 27 [Source:HGNC Symbol;Acc:18632]                                            |
| 4940 | ENSG00000166405 | 116.5465064 | 1.277592831  | 0.307098532 | 0.000120452 | RIC3          | RIC3 acetylcholine receptor chaperone [Source:HGNC Symbol;Acc:30338]                               |
| 4941 | ENSG00000183963 | 102.4574169 | -1.253637245 | 0.301370084 | 0.000120645 | SMTN          | smoothelin [Source:HGNC Symbol;Acc:11126]                                                          |
| 4942 | ENSG00000144136 | 1734.23049  | 0.388346159  | 0.093366494 | 0.000120842 | SLC20A1       | solute carrier family 20 (phosphate transporter), member 1 [Source:HGNC Symbol;Acc:10946]          |
| 4943 | ENSG00000206505 | 987.745088  | 1.134227862  | 0.272716783 | 0.000121018 | HLA-A         | major histocompatibility complex, class I, A [Source:HGNC Symbol;Acc:4931]                         |
| 4944 | ENSG00000172046 | 2043.678307 | 0.420965544  | 0.101249056 | 0.000121669 | USP19         | ubiquitin specific peptidase 19 [Source:HGNC Symbol;Acc:12617]                                     |
| 4945 | ENSG00000137675 | 17.35421709 | -2.233769626 | 0.537265572 | 0.000121676 | MMP27         | matrix metalloproteinase 27 [Source:HGNC Symbol;Acc:14250]                                         |
| 4946 | ENSG00000223509 | 818.9149544 | -0.502352281 | 0.120831568 | 0.000121761 | RP11-632K20.7 |                                                                                                    |
| 4947 | ENSG00000148843 | 644.0508385 | 0.558897129  | 0.13447053  | 0.000122366 | PDCD11        | programmed cell death 11 [Source:HGNC Symbol;Acc:13408]                                            |
| 4948 | ENSG00000155876 | 909.7811361 | 0.462788909  | 0.111355064 | 0.000122504 | RRAGA         | Ras-related GTP binding A [Source:HGNC Symbol;Acc:16963]                                           |
| 4949 | ENSG00000142409 | 576.0225941 | -0.64314475  | 0.154827644 | 0.000123575 | ZNF787        | zinc finger protein 787 [Source:HGNC Symbol;Acc:26998]                                             |
| 4950 | ENSG00000135632 | 279.0178177 | 0.778712452  | 0.18750546  | 0.000124052 | SMYD5         | SMYD family member 5 [Source:HGNC Symbol;Acc:16258]                                                |

|      |                 |             |              |             |             |            |                                                                                                                                                |
|------|-----------------|-------------|--------------|-------------|-------------|------------|------------------------------------------------------------------------------------------------------------------------------------------------|
| 4951 | ENSG00000050438 | 80.43471208 | 1.355183571  | 0.326407319 | 0.000124676 | SLC4A8     | solute carrier family 4, sodium bicarbonate cotransporter, member 8 [Source:HGNC Symbol;Acc:11034]                                             |
| 4952 | ENSG00000136925 | 371.3697464 | 0.709452288  | 0.170941167 | 0.000125496 | TSTD2      | thiosulfate sulfurtransferase (rhodanese)-like domain containing 2 [Source:HGNC Symbol;Acc:30087]                                              |
| 4953 | ENSG00000122042 | 1492.080144 | 0.401048742  | 0.096661938 | 0.000126179 | UBL3       | ubiquitin-like 3 [Source:HGNC Symbol;Acc:12504]                                                                                                |
| 4954 | ENSG00000114120 | 1096.664672 | 0.470650318  | 0.113450887 | 0.000126423 | SLC25A36   | solute carrier family 25 (pyrimidine nucleotide carrier ), member 36 [Source:HGNC Symbol;Acc:25554]                                            |
| 4955 | ENSG00000266338 | 265.6673273 | 1.806994555  | 0.435599423 | 0.000126508 | NBPF15     | neuroblastoma breakpoint family, member 15 [Source:HGNC Symbol;Acc:28791]                                                                      |
| 4956 | ENSG00000205339 | 1107.012573 | 0.43365085   | 0.104598777 | 0.000127839 | IPO7       | importin 7 [Source:HGNC Symbol;Acc:9852]                                                                                                       |
| 4957 | ENSG00000163104 | 578.6399555 | 0.626142594  | 0.151108666 | 0.000129042 | SMARCAD1   | SWI/SNF-related, matrix-associated actin-dependent regulator of chromatin, subfamily a, containing DEAD/H box 1 [Source:HGNC Symbol;Acc:18398] |
| 4958 | ENSG00000131773 | 25.78613231 | 2.081719205  | 0.502666306 | 0.000130319 | KHDRBS3    | KH domain containing, RNA binding, signal transduction associated 3 [Source:HGNC Symbol;Acc:18117]                                             |
| 4959 | ENSG00000243244 | 133.8570705 | -1.089474902 | 0.26309623  | 0.000130508 | STON1      | stonin 1 [Source:HGNC Symbol;Acc:17003]                                                                                                        |
| 4960 | ENSG00000103540 | 766.0604841 | -0.483075138 | 0.116684026 | 0.000131022 | CCP110     | centriolar coiled coil protein 110kDa [Source:HGNC Symbol;Acc:24342]                                                                           |
| 4961 | ENSG00000108021 | 1068.298438 | 0.4286013    | 0.103535427 | 0.000131207 | FAM208B    | family with sequence similarity 208, member B [Source:HGNC Symbol;Acc:23484]                                                                   |
| 4962 | ENSG00000136213 | 160.9331554 | 1.040736893  | 0.251525868 | 0.000132309 | CHST12     | carbohydrate (chondroitin 4) sulfotransferase 12 [Source:HGNC Symbol;Acc:17423]                                                                |
| 4963 | ENSG00000269654 | 37.3183781  | 1.905198804  | 0.460772221 | 0.000133962 | MAGEE1     | melanoma antigen family E, 1 [Source:HGNC Symbol;Acc:24934]                                                                                    |
| 4964 | ENSG00000198182 | 94.79439914 | 1.297352471  | 0.313901059 | 0.000134987 | ZNF607     | zinc finger protein 607 [Source:HGNC Symbol;Acc:28192]                                                                                         |
| 4965 | ENSG00000146243 | 148.7880957 | -1.104651259 | 0.267306352 | 0.000135236 | IRAK1BP1   | interleukin-1 receptor-associated kinase 1 binding protein 1 [Source:HGNC Symbol;Acc:17368]                                                    |
| 4966 | ENSG00000263687 | 56.3875732  | -1.92446401  | 0.466007835 | 0.000136894 | FAM72A     | family with sequence similarity 72, member A [Source:HGNC Symbol;Acc:24044]                                                                    |
| 4967 | ENSG00000173230 | 2559.038566 | 0.364395342  | 0.088249293 | 0.000137178 | GOLGB1     | golgin B1 [Source:HGNC Symbol;Acc:4429]                                                                                                        |
| 4968 | ENSG00000107957 | 187.4800067 | 0.971319633  | 0.235273065 | 0.000137557 | SH3PXD2A   | SH3 and PX domains 2A [Source:HGNC Symbol;Acc:23664]                                                                                           |
| 4969 | ENSG00000154734 | 31.59865884 | 1.976979557  | 0.479021583 | 0.000138344 | ADAMTS1    | ADAM metalloproteinase with thrombospondin type 1 motif, 1 [Source:HGNC Symbol;Acc:217]                                                        |
| 4970 | ENSG00000166860 | 213.1088836 | 0.887743803  | 0.215102965 | 0.000138349 | ZBTB39     | zinc finger and BTB domain containing 39 [Source:HGNC Symbol;Acc:29014]                                                                        |
| 4971 | ENSG00000081154 | 1874.651242 | 0.361507434  | 0.087633791 | 0.000139443 | PCNP       | PEST proteolytic signal containing nuclear protein [Source:HGNC Symbol;Acc:30023]                                                              |
| 4972 | ENSG00000168672 | 184.488012  | 1.020408061  | 0.247425207 | 0.000140082 | FAM84B     | family with sequence similarity 84, member B [Source:HGNC Symbol;Acc:24166]                                                                    |
| 4973 | ENSG00000113108 | 814.8050089 | 0.534805524  | 0.129697366 | 0.000140431 | APBB3      | amyloid beta (A4) precursor protein-binding, family B, member 3 [Source:HGNC Symbol;Acc:20708]                                                 |
| 4974 | ENSG00000111859 | 1846.218838 | 0.349704474  | 0.084816141 | 0.000140647 | NEDD9      | neural precursor cell expressed, developmentally down-regulated 9 [Source:HGNC Symbol;Acc:7733]                                                |
| 4975 | ENSG00000257245 | 49.18729161 | -1.643419882 | 0.398616054 | 0.000140758 | CR388229.1 |                                                                                                                                                |
| 4976 | ENSG00000257744 | 49.18729161 | -1.643419882 | 0.398616054 | 0.000140758 | AL662833.1 |                                                                                                                                                |
| 4977 | ENSG00000241878 | 4165.459364 | 0.271316933  | 0.065814842 | 0.000140966 | PISD       | phosphatidylserine decarboxylase [Source:HGNC Symbol;Acc:8999]                                                                                 |
| 4978 | ENSG00000114491 | 341.0600721 | -0.696086069 | 0.168877175 | 0.000141293 | UMPS       | uridine monophosphate synthetase [Source:HGNC Symbol;Acc:12563]                                                                                |



|      |                 |             |              |             |             |          |                                                                                             |
|------|-----------------|-------------|--------------|-------------|-------------|----------|---------------------------------------------------------------------------------------------|
| 4979 | ENSG00000118705 | 2538.051527 | -0.301454286 | 0.073160047 | 0.000142108 | RPN2     | ribophorin II [Source:HGNC Symbol;Acc:10382]                                                |
| 4980 | ENSG00000079435 | 164.716772  | -1.084084397 | 0.263101821 | 0.000142128 | LIPE     | lipase, hormone-sensitive [Source:HGNC Symbol;Acc:6621]                                     |
| 4981 | ENSG00000111863 | 38.97707751 | 1.971666934  | 0.478635594 | 0.000142748 | ADTRP    | androgen-dependent TFPI-regulating protein [Source:HGNC Symbol;Acc:21214]                   |
| 4982 | ENSG00000163531 | 49.1744184  | -1.646449306 | 0.399753572 | 0.000143146 | NFASC    | neurofascin [Source:HGNC Symbol;Acc:29866]                                                  |
| 4983 | ENSG00000132938 | 13.89101116 | 2.325918926  | 0.564784409 | 0.000143378 | MTUS2    | microtubule associated tumor suppressor candidate 2 [Source:HGNC Symbol;Acc:20595]          |
| 4984 | ENSG00000153201 | 2602.170699 | 0.337716107  | 0.08202344  | 0.000143928 | RANBP2   | RAN binding protein 2 [Source:HGNC Symbol;Acc:9848]                                         |
| 4985 | ENSG00000169032 | 1588.847092 | -0.383242976 | 0.093099722 | 0.000144407 | MAP2K1   | mitogen-activated protein kinase kinase 1 [Source:HGNC Symbol;Acc:6840]                     |
| 4986 | ENSG00000146834 | 1466.536636 | 0.409563794  | 0.099494329 | 0.000144407 | MEPCE    | methylphosphate capping enzyme [Source:HGNC Symbol;Acc:20247]                               |
| 4987 | ENSG00000104880 | 1676.484434 | 0.424420305  | 0.103107062 | 0.000144447 | ARHGEF18 | Rho/Rac guanine nucleotide exchange factor (GEF) 18 [Source:HGNC Symbol;Acc:17090]          |
| 4988 | ENSG00000136098 | 141.7044811 | 1.074154917  | 0.260958592 | 0.000144515 | NEK3     | NIMA-related kinase 3 [Source:HGNC Symbol;Acc:7746]                                         |
| 4989 | ENSG00000116560 | 7474.387428 | -0.234456794 | 0.056973398 | 0.000145109 | SFPQ     | splicing factor proline/glutamine-rich [Source:HGNC Symbol;Acc:10774]                       |
| 4990 | ENSG00000144320 | 904.6820751 | -0.557274473 | 0.135438637 | 0.000145462 | KIAA1715 | KIAA1715 [Source:HGNC Symbol;Acc:21610]                                                     |
| 4991 | ENSG00000166224 | 1143.721951 | 0.442793802  | 0.107619934 | 0.000145539 | SGPL1    | sphingosine-1-phosphate lyase 1 [Source:HGNC Symbol;Acc:10817]                              |
| 4992 | ENSG00000176485 | 93.43993346 | 1.361845559  | 0.33103135  | 0.00014581  | PLA2G16  | phospholipase A2, group XVI [Source:HGNC Symbol;Acc:17825]                                  |
| 4993 | ENSG00000163539 | 859.407864  | -0.461051501 | 0.112075182 | 0.000145893 | CLASP2   | cytoplasmic linker associated protein 2 [Source:HGNC Symbol;Acc:17078]                      |
| 4994 | ENSG00000017797 | 2818.541788 | 0.287856432  | 0.069979819 | 0.000146084 | RALBP1   | ralA binding protein 1 [Source:HGNC Symbol;Acc:9841]                                        |
| 4995 | ENSG00000100150 | 394.4824059 | -0.682646518 | 0.165961342 | 0.00014614  | DEPDC5   | DEP domain containing 5 [Source:HGNC Symbol;Acc:18423]                                      |
| 4996 | ENSG00000117153 | 1067.104381 | -0.433480743 | 0.105406982 | 0.000146642 | KLHL12   | kelch-like family member 12 [Source:HGNC Symbol;Acc:19360]                                  |
| 4997 | ENSG00000172508 | 167.7751193 | 1.045828339  | 0.254311224 | 0.000146647 | CARNS1   | carnosine synthase 1 [Source:HGNC Symbol;Acc:29268]                                         |
| 4998 | ENSG00000114316 | 4358.457661 | -0.262225299 | 0.063825464 | 0.000149128 | USP4     | ubiquitin specific peptidase 4 (proto-oncogene) [Source:HGNC Symbol;Acc:12627]              |
| 4999 | ENSG00000081386 | 293.3205473 | 0.810296836  | 0.197233209 | 0.000149199 | ZNF510   | zinc finger protein 510 [Source:HGNC Symbol;Acc:29161]                                      |
| 5000 | ENSG00000091136 | 113.2910022 | -1.189815286 | 0.289628871 | 0.000149331 | LAMB1    | laminin, beta 1 [Source:HGNC Symbol;Acc:6486]                                               |
| 5001 | ENSG00000144485 | 54.15902768 | -1.563655286 | 0.380642536 | 0.000149387 | HES6     | hes family bHLH transcription factor 6 [Source:HGNC Symbol;Acc:18254]                       |
| 5002 | ENSG00000099998 | 122.3882975 | 1.17210418   | 0.285425352 | 0.000150277 | GGT5     | gamma-glutamyltransferase 5 [Source:HGNC Symbol;Acc:4260]                                   |
| 5003 | ENSG00000102755 | 58.6200316  | 1.531082068  | 0.372888908 | 0.000150567 | FLT1     | fms-related tyrosine kinase 1 [Source:HGNC Symbol;Acc:3763]                                 |
| 5004 | ENSG00000205277 | 10.30843134 | 2.327282907  | 0.566803338 | 0.000150567 | MUC12    | mucin 12, cell surface associated [Source:HGNC Symbol;Acc:7510]                             |
| 5005 | ENSG00000075856 | 886.5568582 | 0.461203311  | 0.112344178 | 0.000150999 | SART3    | squamous cell carcinoma antigen recognized by T cells 3 [Source:HGNC Symbol;Acc:16860]      |
| 5006 | ENSG00000137806 | 299.6785002 | -0.770154783 | 0.187715124 | 0.0001526   | NDUFAF1  | NADH dehydrogenase (ubiquinone) complex I, assembly factor 1 [Source:HGNC Symbol;Acc:18828] |

|      |                 |             |              |             |             |              |                                                                                                                                                 |
|------|-----------------|-------------|--------------|-------------|-------------|--------------|-------------------------------------------------------------------------------------------------------------------------------------------------|
| 5007 | ENSG00000163344 | 183.4391616 | 0.927140618  | 0.226005189 | 0.000152892 | PMVK         | phosphomevalonate kinase [Source:HGNC Symbol;Acc:9141]                                                                                          |
| 5008 | ENSG00000168172 | 1446.16589  | -0.419197129 | 0.102189006 | 0.000152943 | HOOK3        | hook microtubule-tethering protein 3 [Source:HGNC Symbol;Acc:23576]                                                                             |
| 5009 | ENSG00000185614 | 46.79254948 | 1.665669426  | 0.406052517 | 0.000152959 | FAM212A      | family with sequence similarity 212, member A [Source:HGNC Symbol;Acc:32480]                                                                    |
| 5010 | ENSG00000154978 | 1723.940125 | 0.351411868  | 0.085667998 | 0.000152984 | VOPP1        | vesicular, overexpressed in cancer, prosurvival protein 1 [Source:HGNC Symbol;Acc:34518]                                                        |
| 5011 | ENSG00000205155 | 814.7331842 | 0.507000927  | 0.123654969 | 0.000154211 | PSENN        | presenilin enhancer gamma secretase subunit [Source:HGNC Symbol;Acc:30100]                                                                      |
| 5012 | ENSG00000214135 | 734.0864285 | -0.504092644 | 0.122956718 | 0.000154406 | AC024560.3   |                                                                                                                                                 |
| 5013 | ENSG00000198715 | 543.573645  | -0.613183751 | 0.149566506 | 0.000154406 | C1orf85      | chromosome 1 open reading frame 85 [Source:HGNC Symbol;Acc:29436]                                                                               |
| 5014 | ENSG00000268273 | 49.01138214 | 1.642496281  | 0.400776266 | 0.000155347 | GSP2         | G1 to S phase transition 2 [Source:HGNC Symbol;Acc:4622]                                                                                        |
| 5015 | ENSG00000115998 | 284.7507056 | 0.810254709  | 0.197718338 | 0.000155492 | C2orf42      | chromosome 2 open reading frame 42 [Source:HGNC Symbol;Acc:26056]                                                                               |
| 5016 | ENSG00000153048 | 977.5309013 | -0.430036195 | 0.104962737 | 0.000156126 | CARHSP1      | calcium regulated heat stable protein 1, 24kDa [Source:HGNC Symbol;Acc:17150]                                                                   |
| 5017 | ENSG00000250506 | 473.9719614 | -0.629921525 | 0.153784428 | 0.000156705 | CDK3         | cyclin-dependent kinase 3 [Source:HGNC Symbol;Acc:1772]                                                                                         |
| 5018 | ENSG00000108797 | 147.8352428 | -1.144425005 | 0.279399186 | 0.00015675  | CNTNAP1      | contactin associated protein 1 [Source:HGNC Symbol;Acc:8011]                                                                                    |
| 5019 | ENSG00000156467 | 2419.921208 | 0.301714371  | 0.073669836 | 0.000157076 | UQCRB        | ubiquinol-cytochrome c reductase binding protein [Source:HGNC Symbol;Acc:12582]                                                                 |
| 5020 | ENSG00000105376 | 18.19710404 | -2.201725962 | 0.537817495 | 0.000158186 | ICAM5        | intercellular adhesion molecule 5, telencephalin [Source:HGNC Symbol;Acc:5348]                                                                  |
| 5021 | ENSG00000118804 | 176.3417309 | -0.985120062 | 0.240656672 | 0.000158393 | FAM47E-STBD1 | FAM47E-STBD1 readthrough [Source:HGNC Symbol;Acc:44667]                                                                                         |
| 5022 | ENSG00000135622 | 93.95581618 | 1.430180538  | 0.349393413 | 0.000158459 | SEMA4F       | sema domain, immunoglobulin domain (Ig), transmembrane domain (TM) and short cytoplasmic domain, (semaphorin) 4F [Source:HGNC Symbol;Acc:10734] |
| 5023 | ENSG00000168653 | 938.0035767 | -0.437206766 | 0.106814781 | 0.00015856  | NDUFS5       | NADH dehydrogenase (ubiquinone) Fe-S protein 5, 15kDa (NADH-coenzyme Q reductase) [Source:HGNC Symbol;Acc:7712]                                 |
| 5024 | ENSG00000244607 | 93.70345238 | -1.24796676  | 0.305134976 | 0.000160763 | CCDC13       | coiled-coil domain containing 13 [Source:HGNC Symbol;Acc:26358]                                                                                 |
| 5025 | ENSG00000179364 | 198.3146997 | 0.924822977  | 0.226150607 | 0.000161059 | PACS2        | phosphofurin acidic cluster sorting protein 2 [Source:HGNC Symbol;Acc:23794]                                                                    |
| 5026 | ENSG00000271374 | 198.3143228 | 0.924744383  | 0.22614962  | 0.000161256 | PACS2        | phosphofurin acidic cluster sorting protein 2 [Source:HGNC Symbol;Acc:23794]                                                                    |
| 5027 | ENSG00000186871 | 81.44155728 | -1.322055351 | 0.323335511 | 0.000161418 | ERCC6L       | excision repair cross-complementing rodent repair deficiency, complementation group 6-like [Source:HGNC Symbol;Acc:20794]                       |
| 5028 | ENSG00000254685 | 405.8013478 | -0.670674655 | 0.164137157 | 0.000163303 | FPGT         | fucose-1-phosphate guanylyltransferase [Source:HGNC Symbol;Acc:3825]                                                                            |
| 5029 | ENSG00000205352 | 9717.839925 | -0.214066431 | 0.052398182 | 0.000163752 | PRR13        | proline rich 13 [Source:HGNC Symbol;Acc:24528]                                                                                                  |
| 5030 | ENSG00000122376 | 358.9932015 | 0.725113983  | 0.177571224 | 0.000165042 | FAM35A       | family with sequence similarity 35, member A [Source:HGNC Symbol;Acc:28773]                                                                     |
| 5031 | ENSG00000184939 | 689.2587063 | 0.525046522  | 0.128594954 | 0.000165409 | ZFP90        | ZFP90 zinc finger protein [Source:HGNC Symbol;Acc:23329]                                                                                        |
| 5032 | ENSG00000164609 | 1871.212646 | 0.387189929  | 0.094863047 | 0.000166362 | SLU7         | SLU7 splicing factor homolog (S. cerevisiae) [Source:HGNC Symbol;Acc:16939]                                                                     |
| 5033 | ENSG00000112365 | 441.4025918 | 0.65658146   | 0.160906185 | 0.000167078 | ZBTB24       | zinc finger and BTB domain containing 24 [Source:HGNC Symbol;Acc:21143]                                                                         |
| 5034 | ENSG00000176974 | 351.3113534 | -0.709243957 | 0.173891449 | 0.00016839  | SHMT1        | serine hydroxymethyltransferase 1 (soluble) [Source:HGNC Symbol;Acc:10850]                                                                      |

|      |                 |             |              |             |             |              |                                                                                                                 |
|------|-----------------|-------------|--------------|-------------|-------------|--------------|-----------------------------------------------------------------------------------------------------------------|
| 5035 | ENSG00000120256 | 64.32738687 | -1.539081453 | 0.377387568 | 0.000168651 | LRP11        | low density lipoprotein receptor-related protein 11 [Source:HGNC Symbol;Acc:16936]                              |
| 5036 | ENSG00000115239 | 737.7656819 | -0.562026016 | 0.137839588 | 0.000169242 | GPR75-ASB3   | GPR75-ASB3 readthrough [Source:HGNC Symbol;Acc:40043]                                                           |
| 5037 | ENSG00000117523 | 6792.501394 | 0.288456667  | 0.07075524  | 0.000169622 | PRRC2C       | proline-rich coiled-coil 2C [Source:HGNC Symbol;Acc:24903]                                                      |
| 5038 | ENSG00000068137 | 39.46753454 | -1.881997831 | 0.461647323 | 0.000169679 | PLEKHH3      | pleckstrin homology domain containing, family H (with MyTH4 domain) member 3 [Source:HGNC Symbol;Acc:26105]     |
| 5039 | ENSG00000215077 | 4355.59659  | -0.302942335 | 0.074315844 | 0.000169833 | BRD2         | bromodomain containing 2 [Source:HGNC Symbol;Acc:1103]                                                          |
| 5040 | ENSG00000067113 | 24.44711759 | 2.057194617  | 0.504660105 | 0.000169833 | PPAP2A       | phosphatidic acid phosphatase type 2A [Source:HGNC Symbol;Acc:9228]                                             |
| 5041 | ENSG00000115641 | 101.7189574 | -1.216294043 | 0.298602995 | 0.000172088 | FHL2         | four and a half LIM domains 2 [Source:HGNC Symbol;Acc:3703]                                                     |
| 5042 | ENSG00000140025 | 89.87360671 | -1.268326324 | 0.311414769 | 0.000172419 | EFCAB11      | EF-hand calcium binding domain 11 [Source:HGNC Symbol;Acc:20357]                                                |
| 5043 | ENSG00000215630 | 85.79332229 | 1.363421415  | 0.334814281 | 0.000172841 | GUSBP9       | glucuronidase, beta pseudogene 9 [Source:HGNC Symbol;Acc:42323]                                                 |
| 5044 | ENSG00000253729 | 2500.441528 | 0.305692406  | 0.07507346  | 0.000173001 | PRKDC        | protein kinase, DNA-activated, catalytic polypeptide [Source:HGNC Symbol;Acc:9413]                              |
| 5045 | ENSG00000103479 | 11682.37284 | -0.236557091 | 0.058098579 | 0.000173116 | RBL2         | retinoblastoma-like 2 (p130) [Source:HGNC Symbol;Acc:9894]                                                      |
| 5046 | ENSG00000110455 | 372.19683   | 0.683050328  | 0.167770263 | 0.000173354 | ACCS         | 1-aminocyclopropane-1-carboxylate synthase homolog (Arabidopsis)(non-functional) [Source:HGNC Symbol;Acc:23989] |
| 5047 | ENSG00000197106 | 47.24851054 | -1.635378489 | 0.401697072 | 0.000173446 | SLC6A17      | solute carrier family 6 (neutral amino acid transporter), member 17 [Source:HGNC Symbol;Acc:31399]              |
| 5048 | ENSG00000177156 | 15336.09258 | -0.205587554 | 0.050512509 | 0.000174263 | TALDO1       | transaldolase 1 [Source:HGNC Symbol;Acc:11559]                                                                  |
| 5049 | ENSG00000169224 | 84.72577743 | -1.321920273 | 0.324836351 | 0.00017463  | GCSAML       | germinal center-associated, signaling and motility-like [Source:HGNC Symbol;Acc:29583]                          |
| 5050 | ENSG00000164331 | 601.9741394 | 0.577054055  | 0.141811904 | 0.000174855 | ANKRA2       | ankyrin repeat, family A (RFXANK-like), 2 [Source:HGNC Symbol;Acc:13208]                                        |
| 5051 | ENSG00000198756 | 107.0606851 | 1.206953426  | 0.296632639 | 0.000175047 | COLGALT2     | collagen beta(1-O)galactosyltransferase 2 [Source:HGNC Symbol;Acc:16790]                                        |
| 5052 | ENSG00000172845 | 3992.742326 | -0.256058411 | 0.06293222  | 0.000175051 | SP3          | Sp3 transcription factor [Source:HGNC Symbol;Acc:11208]                                                         |
| 5053 | ENSG00000168246 | 197.0741694 | 0.887273849  | 0.218075389 | 0.000175122 | UBTD2        | ubiquitin domain containing 2 [Source:HGNC Symbol;Acc:24463]                                                    |
| 5054 | ENSG00000112624 | 1820.555578 | 0.338113611  | 0.083111012 | 0.000175418 | GLTSCR1L     | GLTSCR1-like [Source:HGNC Symbol;Acc:21111]                                                                     |
| 5055 | ENSG00000064932 | 1447.335448 | 0.411484212  | 0.101180819 | 0.000176437 | SBNO2        | strawberry notch homolog 2 (Drosophila) [Source:HGNC Symbol;Acc:29158]                                          |
| 5056 | ENSG00000146457 | 3420.632203 | 0.292620632  | 0.071970764 | 0.000177156 | WTAP         | Wilms tumor 1 associated protein [Source:HGNC Symbol;Acc:16846]                                                 |
| 5057 | ENSG00000090920 | 134.3563451 | 1.434690189  | 0.352873031 | 0.000177186 | FCGBP        | Fc fragment of IgG binding protein [Source:HGNC Symbol;Acc:13572]                                               |
| 5058 | ENSG00000261884 | 601.6746339 | 0.555582368  | 0.136680832 | 0.000177855 | CTC-479C5.12 |                                                                                                                 |
| 5059 | ENSG00000101166 | 781.8071007 | 0.574726673  | 0.141399994 | 0.000178026 | SLMO2        | slowmo homolog 2 (Drosophila) [Source:HGNC Symbol;Acc:15892]                                                    |
| 5060 | ENSG00000105392 | 109.782368  | -1.168221325 | 0.287529221 | 0.0001792   | CRX          | cone-rod homeobox [Source:HGNC Symbol;Acc:2383]                                                                 |
| 5061 | ENSG00000096717 | 836.8479124 | 0.513615506  | 0.126437757 | 0.000179753 | SIRT1        | sirtuin 1 [Source:HGNC Symbol;Acc:14929]                                                                        |
| 5062 | ENSG00000104885 | 673.2845819 | -0.533792048 | 0.131425437 | 0.000180213 | DOT1L        | DOT1-like histone H3K79 methyltransferase [Source:HGNC Symbol;Acc:24948]                                        |

|      |                 |             |              |             |             |               |                                                                                                                       |
|------|-----------------|-------------|--------------|-------------|-------------|---------------|-----------------------------------------------------------------------------------------------------------------------|
| 5063 | ENSG00000119772 | 763.0962667 | 0.520543579  | 0.12817128  | 0.000180367 | DNMT3A        | DNA (cytosine-5-)-methyltransferase 3 alpha [Source:HGNC Symbol;Acc:2978]                                             |
| 5064 | ENSG00000149658 | 1199.133151 | 0.399925747  | 0.098510536 | 0.000181561 | YTHDF1        | YTH domain family, member 1 [Source:HGNC Symbol;Acc:15867]                                                            |
| 5065 | ENSG00000148842 | 472.5738417 | -0.714528934 | 0.176015987 | 0.000181736 | CNNM2         | cyclin M2 [Source:HGNC Symbol;Acc:103]                                                                                |
| 5066 | ENSG00000198373 | 2924.89733  | -0.292094138 | 0.071955033 | 0.000181744 | WWP2          | WW domain containing E3 ubiquitin protein ligase 2 [Source:HGNC Symbol;Acc:16804]                                     |
| 5067 | ENSG00000000460 | 259.6979034 | -0.78083863  | 0.192365043 | 0.000181901 | C1orf112      | chromosome 1 open reading frame 112 [Source:HGNC Symbol;Acc:25565]                                                    |
| 5068 | ENSG00000243302 | 961.2972395 | -0.448940832 | 0.110604641 | 0.000182007 | RP11-274B21.2 |                                                                                                                       |
| 5069 | ENSG00000008277 | 257.2137901 | -0.830652368 | 0.204691662 | 0.000182675 | ADAM22        | ADAM metallopeptidase domain 22 [Source:HGNC Symbol;Acc:201]                                                          |
| 5070 | ENSG00000177697 | 495.5478504 | -0.577843582 | 0.142491011 | 0.000184816 | CD151         | CD151 molecule (Raph blood group) [Source:HGNC Symbol;Acc:1630]                                                       |
| 5071 | ENSG00000004534 | 6191.153787 | -0.224831887 | 0.055448417 | 0.000185148 | RBM6          | RNA binding motif protein 6 [Source:HGNC Symbol;Acc:9903]                                                             |
| 5072 | ENSG00000089280 | 9069.97111  | 0.219677735  | 0.054177379 | 0.000185148 | FUS           | fused in sarcoma [Source:HGNC Symbol;Acc:4010]                                                                        |
| 5073 | ENSG00000154727 | 996.1000533 | 0.432298697  | 0.106620219 | 0.000185286 | GABPA         | GA binding protein transcription factor, alpha subunit 60kDa [Source:HGNC Symbol;Acc:4071]                            |
| 5074 | ENSG00000160058 | 1917.875613 | -0.332182292 | 0.081953188 | 0.000186242 | BSDC1         | BSD domain containing 1 [Source:HGNC Symbol;Acc:25501]                                                                |
| 5075 | ENSG00000065135 | 2453.243524 | -0.325377876 | 0.080338527 | 0.000188796 | GNAI3         | guanine nucleotide binding protein (G protein), alpha inhibiting activity polypeptide 3 [Source:HGNC Symbol;Acc:4387] |
| 5076 | ENSG00000204519 | 208.990273  | 0.868066132  | 0.214351004 | 0.000189036 | ZNF551        | zinc finger protein 551 [Source:HGNC Symbol;Acc:25108]                                                                |
| 5077 | ENSG00000185800 | 200.0224762 | -0.938528664 | 0.231824933 | 0.000190055 | DMWD          | dystrophia myotonica, WD repeat containing [Source:HGNC Symbol;Acc:2936]                                              |
| 5078 | ENSG00000105829 | 403.9252293 | 0.680715952  | 0.168151161 | 0.000190179 | BET1          | Bet1 golgi vesicular membrane trafficking protein [Source:HGNC Symbol;Acc:14562]                                      |
| 5079 | ENSG00000189369 | 49.47444262 | 1.616990881  | 0.399466606 | 0.000190437 | GSPT2         | G1 to S phase transition 2 [Source:HGNC Symbol;Acc:4622]                                                              |
| 5080 | ENSG00000005812 | 1661.959656 | 0.364948712  | 0.090174256 | 0.00019099  | FBXL3         | F-box and leucine-rich repeat protein 3 [Source:HGNC Symbol;Acc:13599]                                                |
| 5081 | ENSG00000124762 | 230.5112665 | 0.826441208  | 0.204256377 | 0.000191812 | CDKN1A        | cyclin-dependent kinase inhibitor 1A (p21, Cip1) [Source:HGNC Symbol;Acc:1784]                                        |
| 5082 | ENSG00000090470 | 354.8749963 | 0.670910752  | 0.165843965 | 0.000192319 | PDCD7         | programmed cell death 7 [Source:HGNC Symbol;Acc:8767]                                                                 |
| 5083 | ENSG00000129103 | 1144.484711 | 0.407705997  | 0.100792916 | 0.000192648 | SUMF2         | sulfatase modifying factor 2 [Source:HGNC Symbol;Acc:20415]                                                           |
| 5084 | ENSG00000010932 | 38.02639065 | -1.759010799 | 0.43487127  | 0.000192682 | FMO1          | flavin containing monooxygenase 1 [Source:HGNC Symbol;Acc:3769]                                                       |
| 5085 | ENSG00000196116 | 854.3550853 | -0.484360445 | 0.119767231 | 0.000193235 | TDRD7         | tudor domain containing 7 [Source:HGNC Symbol;Acc:30831]                                                              |
| 5086 | ENSG00000163818 | 237.3542042 | 0.893245378  | 0.220906196 | 0.000193718 | LZTFL1        | leucine zipper transcription factor-like 1 [Source:HGNC Symbol;Acc:6741]                                              |
| 5087 | ENSG00000133142 | 297.0225559 | 0.731706377  | 0.181094667 | 0.000196248 | TCEAL4        | transcription elongation factor A (SII)-like 4 [Source:HGNC Symbol;Acc:26121]                                         |
| 5088 | ENSG00000111087 | 314.6197686 | -0.718422245 | 0.177810775 | 0.000196283 | GLI1          | GLI family zinc finger 1 [Source:HGNC Symbol;Acc:4317]                                                                |
| 5089 | ENSG00000188186 | 4057.604202 | 0.326287565  | 0.080758366 | 0.000196312 | LAMTOR4       | late endosomal/lysosomal adaptor, MAPK and MTOR activator 4 [Source:HGNC Symbol;Acc:33772]                            |
| 5090 | ENSG00000019102 | 30.39992622 | 1.925432794  | 0.47674595  | 0.000197614 | VSIG2         | V-set and immunoglobulin domain containing 2 [Source:HGNC Symbol;Acc:17149]                                           |

|      |                 |             |              |             |             |          |                                                                                           |
|------|-----------------|-------------|--------------|-------------|-------------|----------|-------------------------------------------------------------------------------------------|
| 5091 | ENSG00000271304 | 31.66280624 | -1.848316996 | 0.457751831 | 0.00019832  | DPRXP2   | divergent-paired related homeobox pseudogene 2 [Source:HGNC Symbol;Acc:32168]             |
| 5092 | ENSG00000183665 | 222.9225041 | 0.901846896  | 0.223356929 | 0.000198383 | TRMT12   | tRNA methyltransferase 12 homolog (S. cerevisiae) [Source:HGNC Symbol;Acc:26091]          |
| 5093 | ENSG00000120963 | 1088.302185 | 0.427277889  | 0.10593258  | 0.000201925 | ZNF706   | zinc finger protein 706 [Source:HGNC Symbol;Acc:24992]                                    |
| 5094 | ENSG00000083817 | 68.81569148 | 1.43230723   | 0.355107482 | 0.000201925 | ZNF416   | zinc finger protein 416 [Source:HGNC Symbol;Acc:20645]                                    |
| 5095 | ENSG00000147234 | 70.7349714  | 1.476984297  | 0.366198812 | 0.000202025 | FRMPD3   | FERM and PDZ domain containing 3 [Source:HGNC Symbol;Acc:29382]                           |
| 5096 | ENSG00000116918 | 1224.781682 | -0.426923714 | 0.105862432 | 0.000202389 | TSNAX    | translin-associated factor X [Source:HGNC Symbol;Acc:12380]                               |
| 5097 | ENSG00000155545 | 373.8889314 | 0.689427434  | 0.170992278 | 0.000203087 | MIER3    | mesoderm induction early response 1, family member 3 [Source:HGNC Symbol;Acc:26678]       |
| 5098 | ENSG00000099860 | 1010.694646 | -0.443862459 | 0.110087263 | 0.000203087 | GADD45B  | growth arrest and DNA-damage-inducible, beta [Source:HGNC Symbol;Acc:4096]                |
| 5099 | ENSG00000048740 | 11600.52485 | 0.204182944  | 0.050668367 | 0.00020489  | CELF2    | CUGBP, Elav-like family member 2 [Source:HGNC Symbol;Acc:2550]                            |
| 5100 | ENSG00000198934 | 37.79482759 | 1.847975606  | 0.458705129 | 0.000205822 | MAGEE1   | melanoma antigen family E, 1 [Source:HGNC Symbol;Acc:24934]                               |
| 5101 | ENSG00000178115 | 74.46401849 | -1.528348181 | 0.379384609 | 0.000205944 | GOLGA8Q  | golgin A8 family, member Q [Source:HGNC Symbol;Acc:44408]                                 |
| 5102 | ENSG00000189362 | 189.3357129 | 1.033666272  | 0.256611509 | 0.000206216 | TMEM194B | transmembrane protein 194B [Source:HGNC Symbol;Acc:33700]                                 |
| 5103 | ENSG00000163492 | 84.12328109 | 1.294795439  | 0.321467605 | 0.000206503 | CCDC141  | coiled-coil domain containing 141 [Source:HGNC Symbol;Acc:26821]                          |
| 5104 | ENSG00000172409 | 266.422051  | 0.807997455  | 0.200617749 | 0.000206652 | CLP1     | cleavage and polyadenylation factor I subunit 1 [Source:HGNC Symbol;Acc:16999]            |
| 5105 | ENSG00000006432 | 109.6228888 | 1.191044147  | 0.295731987 | 0.000206676 | MAP3K9   | mitogen-activated protein kinase kinase kinase 9 [Source:HGNC Symbol;Acc:6861]            |
| 5106 | ENSG00000166669 | 436.0433282 | 0.69039038   | 0.171422127 | 0.000206676 | ATF7IP2  | activating transcription factor 7 interacting protein 2 [Source:HGNC Symbol;Acc:20397]    |
| 5107 | ENSG00000133065 | 344.8629716 | 0.708125816  | 0.175887286 | 0.000207876 | SLC41A1  | solute carrier family 41 (magnesium transporter), member 1 [Source:HGNC Symbol;Acc:19429] |
| 5108 | ENSG00000120915 | 159.0300474 | 1.03602677   | 0.257378228 | 0.000208465 | EPHX2    | epoxide hydrolase 2, cytoplasmic [Source:HGNC Symbol;Acc:3402]                            |
| 5109 | ENSG00000142961 | 511.6430193 | 0.605778745  | 0.150519384 | 0.000209062 | MOB3C    | MOB kinase activator 3C [Source:HGNC Symbol;Acc:29800]                                    |
| 5110 | ENSG00000118363 | 1056.049476 | 0.41365785   | 0.102801341 | 0.000209673 | SPCS2    | signal peptidase complex subunit 2 homolog (S. cerevisiae) [Source:HGNC Symbol;Acc:28962] |
| 5111 | ENSG00000166793 | 50.31461174 | -1.602619052 | 0.398316043 | 0.000209962 | YPEL4    | yippee-like 4 (Drosophila) [Source:HGNC Symbol;Acc:18328]                                 |
| 5112 | ENSG00000004799 | 86.37122853 | 1.41089178   | 0.350794089 | 0.000211255 | PK4      | pyruvate dehydrogenase kinase, isozyme 4 [Source:HGNC Symbol;Acc:8812]                    |
| 5113 | ENSG00000166189 | 255.1899905 | 0.831448349  | 0.20679927  | 0.000212506 | HPS6     | Hermansky-Pudlak syndrome 6 [Source:HGNC Symbol;Acc:18817]                                |
| 5114 | ENSG00000143126 | 78.39754669 | 1.434604319  | 0.356829469 | 0.000212589 | CELSR2   | cadherin, EGF LAG seven-pass G-type receptor 2 [Source:HGNC Symbol;Acc:3231]              |
| 5115 | ENSG00000234420 | 1589.457524 | 0.376837375  | 0.093743562 | 0.00021304  | ZNF37BP  | zinc finger protein 37B, pseudogene [Source:HGNC Symbol;Acc:13103]                        |
| 5116 | ENSG00000108829 | 1048.67437  | -0.420185235 | 0.10453524  | 0.000213287 | LRRCS9   | leucine rich repeat containing 59 [Source:HGNC Symbol;Acc:28817]                          |
| 5117 | ENSG00000139737 | 122.0943177 | 1.232774359  | 0.30671236  | 0.000213461 | SLAIN1   | SLAIN motif family, member 1 [Source:HGNC Symbol;Acc:26387]                               |
| 5118 | ENSG00000118965 | 200.1678289 | 0.951722071  | 0.236824987 | 0.000214004 | WDR35    | WD repeat domain 35 [Source:HGNC Symbol;Acc:29250]                                        |

|      |                 |             |              |             |             |              |                                                                                                   |
|------|-----------------|-------------|--------------|-------------|-------------|--------------|---------------------------------------------------------------------------------------------------|
| 5119 | ENSG00000183091 | 176.6302322 | -0.983000181 | 0.244625259 | 0.000214217 | NEB          | nebulin [Source:HGNC Symbol;Acc:7720]                                                             |
| 5120 | ENSG00000130595 | 117.4131908 | 1.213164196  | 0.301916675 | 0.000214342 | TNNT3        | troponin T type 3 (skeletal, fast) [Source:HGNC Symbol;Acc:11950]                                 |
| 5121 | ENSG00000229300 | 258.0163114 | 0.794798317  | 0.197910161 | 0.000216359 | C6orf48      | chromosome 6 open reading frame 48 [Source:HGNC Symbol;Acc:19078]                                 |
| 5122 | ENSG00000198832 | 39.88513034 | 1.787297505  | 0.445063715 | 0.000216437 | SELM         | Selenoprotein M [Source:UniProtKB/Swiss-Prot;Acc:Q8WWX9]                                          |
| 5123 | ENSG00000206380 | 258.0124812 | 0.794797589  | 0.197936846 | 0.000216775 | C6orf48      | chromosome 6 open reading frame 48 [Source:HGNC Symbol;Acc:19078]                                 |
| 5124 | ENSG00000164741 | 58.53250618 | -1.514245148 | 0.377387204 | 0.000219474 | DLC1         | deleted in liver cancer 1 [Source:HGNC Symbol;Acc:2897]                                           |
| 5125 | ENSG00000185361 | 229.4496187 | 0.86112687   | 0.214688095 | 0.000220722 | TNFAIP8L1    | tumor necrosis factor, alpha-induced protein 8-like 1 [Source:HGNC Symbol;Acc:28279]              |
| 5126 | ENSG00000133256 | 127.2003991 | 1.077228186  | 0.268627191 | 0.000221556 | PDE6B        | phosphodiesterase 6B, cGMP-specific, rod, beta [Source:HGNC Symbol;Acc:8786]                      |
| 5127 | ENSG00000113721 | 85.60284683 | 1.633405947  | 0.407332289 | 0.000221621 | PDGFRB       | platelet-derived growth factor receptor, beta polypeptide [Source:HGNC Symbol;Acc:8804]           |
| 5128 | ENSG00000234728 | 257.3022981 | 0.793143359  | 0.1978069   | 0.000221852 | C6orf48      | chromosome 6 open reading frame 48 [Source:HGNC Symbol;Acc:19078]                                 |
| 5129 | ENSG00000168255 | 1614.300825 | 0.349995235  | 0.087287798 | 0.000221852 | POLR2J3      | polymerase (RNA) II (DNA directed) polypeptide J3 [Source:HGNC Symbol;Acc:33853]                  |
| 5130 | ENSG00000157741 | 1298.683456 | -0.374789505 | 0.093482412 | 0.000222253 | UBN2         | ubiquitin 2 [Source:HGNC Symbol;Acc:21931]                                                        |
| 5131 | ENSG00000143179 | 267.2342898 | -0.828518771 | 0.206662659 | 0.000222359 | UCK2         | uridine-cytidine kinase 2 [Source:HGNC Symbol;Acc:12562]                                          |
| 5132 | ENSG00000116815 | 1482.045622 | -0.35639022  | 0.088917226 | 0.00022319  | CD58         | CD58 molecule [Source:HGNC Symbol;Acc:1688]                                                       |
| 5133 | ENSG00000086758 | 3633.15437  | 0.276735636  | 0.069056119 | 0.000223818 | HUWE1        | HECT, UBA and WWE domain containing 1, E3 ubiquitin protein ligase [Source:HGNC Symbol;Acc:30892] |
| 5134 | ENSG00000184545 | 57.50196143 | 1.52516131   | 0.380594551 | 0.000223859 | DUSP8        | dual specificity phosphatase 8 [Source:HGNC Symbol;Acc:3074]                                      |
| 5135 | ENSG00000144843 | 153.0085435 | 1.070291698  | 0.267267533 | 0.000226387 | ADPRH        | ADP-ribosylarginine hydrolase [Source:HGNC Symbol;Acc:269]                                        |
| 5136 | ENSG00000256950 | 35.15015905 | -1.753006827 | 0.437751943 | 0.000226387 | RP11-87C12.2 | 26S proteasome non-ATPase regulatory subunit 9 [Source:UniProtKB/TrEMBL;Acc:F5H7X1]               |
| 5137 | ENSG00000133193 | 1017.555518 | 0.440373545  | 0.110015878 | 0.000228023 | FAM104A      | family with sequence similarity 104, member A [Source:HGNC Symbol;Acc:25918]                      |
| 5138 | ENSG00000132478 | 481.3298612 | 0.631946742  | 0.157885784 | 0.000228228 | UNK          | unkempt family zinc finger [Source:HGNC Symbol;Acc:29369]                                         |
| 5139 | ENSG00000118785 | 77.68103517 | 1.43149397   | 0.357648734 | 0.000228228 | SPP1         | secreted phosphoprotein 1 [Source:HGNC Symbol;Acc:11255]                                          |
| 5140 | ENSG00000143842 | 164.3559277 | 1.077362177  | 0.269195095 | 0.000228524 | SOX13        | SRY (sex determining region Y)-box 13 [Source:HGNC Symbol;Acc:11192]                              |
| 5141 | ENSG00000116731 | 3232.39748  | -0.274796777 | 0.068697768 | 0.000230495 | PRDM2        | PR domain containing 2, with ZNF domain [Source:HGNC Symbol;Acc:9347]                             |
| 5142 | ENSG00000163041 | 22440.55234 | 0.214284651  | 0.053621115 | 0.000234188 | H3F3A        | H3 histone, family 3A [Source:HGNC Symbol;Acc:4764]                                               |
| 5143 | ENSG00000168411 | 910.6426741 | -0.467457566 | 0.116979525 | 0.000234351 | RFWD3        | ring finger and WD repeat domain 3 [Source:HGNC Symbol;Acc:25539]                                 |
| 5144 | ENSG00000259848 | 155.8202938 | 1.026638897  | 0.256987297 | 0.000235457 | AC097374.2   |                                                                                                   |
| 5145 | ENSG00000135916 | 410.6770058 | -0.668228555 | 0.167287005 | 0.000235807 | ITM2C        | integral membrane protein 2C [Source:HGNC Symbol;Acc:6175]                                        |
| 5146 | ENSG00000241394 | 24.98954587 | 1.998271075  | 0.500384286 | 0.000236789 | HLA-DMA      | major histocompatibility complex, class II, DM alpha [Source:HGNC Symbol;Acc:4934]                |

|      |                 |             |              |             |             |                   |                                                                                                                              |
|------|-----------------|-------------|--------------|-------------|-------------|-------------------|------------------------------------------------------------------------------------------------------------------------------|
| 5147 | ENSG00000168036 | 4242.892463 | -0.27389096  | 0.068621501 | 0.000238894 | CTNNB1            | catenin (cadherin-associated protein), beta 1, 88kDa [Source:HGNC Symbol;Acc:2514]                                           |
| 5148 | ENSG00000239779 | 1171.232989 | 0.394954271  | 0.098957892 | 0.000239043 | WBP1              | WW domain binding protein 1 [Source:HGNC Symbol;Acc:12737]                                                                   |
| 5149 | ENSG00000224608 | 370.9910245 | 0.688473703  | 0.172549501 | 0.000240128 | HLA-B             | major histocompatibility complex, class I, B [Source:HGNC Symbol;Acc:4932]                                                   |
| 5150 | ENSG00000160683 | 22.29481303 | 2.110414852  | 0.528930149 | 0.000240128 | CXCR5             | chemokine (C-X-C motif) receptor 5 [Source:HGNC Symbol;Acc:1060]                                                             |
| 5151 | ENSG00000178732 | 30.35489764 | 1.918731738  | 0.480916439 | 0.000240313 | GP5               | glycoprotein V (platelet) [Source:HGNC Symbol;Acc:4443]                                                                      |
| 5152 | ENSG00000083844 | 204.3779924 | 0.877966905  | 0.220099868 | 0.00024107  | ZNF264            | zinc finger protein 264 [Source:HGNC Symbol;Acc:13057]                                                                       |
| 5153 | ENSG00000184178 | 140.5310577 | 1.038227832  | 0.260332089 | 0.000241824 | SCFD2             | sec1 family domain containing 2 [Source:HGNC Symbol;Acc:30676]                                                               |
| 5154 | ENSG00000164118 | 454.2433583 | -0.62856288  | 0.157611312 | 0.000241824 | CEP44             | centrosomal protein 44kDa [Source:HGNC Symbol;Acc:29356]                                                                     |
| 5155 | ENSG00000233902 | 77.55527693 | 1.376451896  | 0.345146151 | 0.000241824 | XXbac-BPG181B23.6 |                                                                                                                              |
| 5156 | ENSG00000046604 | 24.07380309 | -2.002799931 | 0.502203787 | 0.000241824 | DSG2              | desmoglein 2 [Source:HGNC Symbol;Acc:3049]                                                                                   |
| 5157 | ENSG00000177352 | 243.8651703 | 0.848359911  | 0.212731294 | 0.00024186  | CCDC71            | coiled-coil domain containing 71 [Source:HGNC Symbol;Acc:25760]                                                              |
| 5158 | ENSG00000181938 | 174.7692387 | -1.009332101 | 0.253307531 | 0.000245229 | GINS3             | GINS complex subunit 3 (Psf3 homolog) [Source:HGNC Symbol;Acc:25851]                                                         |
| 5159 | ENSG00000155660 | 744.9522451 | 0.486595494  | 0.122154077 | 0.00024636  | PDIA4             | protein disulfide isomerase family A, member 4 [Source:HGNC Symbol;Acc:30167]                                                |
| 5160 | ENSG00000179562 | 725.2466779 | 0.508613179  | 0.127682346 | 0.00024636  | GCC1              | GRIP and coiled-coil domain containing 1 [Source:HGNC Symbol;Acc:19095]                                                      |
| 5161 | ENSG00000178605 | 308.593971  | 0.995884465  | 0.250022217 | 0.000246564 | GTPBP6            | GTP binding protein 6 (putative) [Source:HGNC Symbol;Acc:30189]                                                              |
| 5162 | ENSG00000214081 | 68.50765714 | -1.419556018 | 0.356540087 | 0.000248294 | CYP4F30P          | cytochrome P450, family 4, subfamily F, polypeptide 30, pseudogene [Source:HGNC Symbol;Acc:25270]                            |
| 5163 | ENSG00000211812 | 22.67014964 | 2.073044468  | 0.520791848 | 0.000249158 | TRAV26-2          | T cell receptor alpha variable 26-2 [Source:HGNC Symbol;Acc:12124]                                                           |
| 5164 | ENSG00000117461 | 103.5906665 | 1.253497919  | 0.314905007 | 0.000249158 | PIK3R3            | phosphoinositide-3-kinase, regulatory subunit 3 (gamma) [Source:HGNC Symbol;Acc:8981]                                        |
| 5165 | ENSG00000179915 | 41.30316435 | -1.688937784 | 0.424348316 | 0.000249618 | NRXN1             | neurexin 1 [Source:HGNC Symbol;Acc:8008]                                                                                     |
| 5166 | ENSG00000260753 | 41.08842418 | 1.742091699  | 0.437754959 | 0.000250063 | NT5C3B            | 5'-nucleotidase, cytosolic IIIB [Source:HGNC Symbol;Acc:28300]                                                               |
| 5167 | ENSG00000143641 | 751.3118497 | -0.530603075 | 0.133343946 | 0.000250434 | GALNT2            | UDP-N-acetyl-alpha-D-galactosamine:polypeptide N-acetylgalactosaminyltransferase 2 (GalNAc-T2) [Source:HGNC Symbol;Acc:4124] |
| 5168 | ENSG00000127527 | 1486.150506 | 0.361419016  | 0.090833266 | 0.000250679 | EPS15L1           | epidermal growth factor receptor pathway substrate 15-like 1 [Source:HGNC Symbol;Acc:24634]                                  |
| 5169 | ENSG00000157404 | 90.87700197 | -1.24518886  | 0.313215078 | 0.00025426  | KIT               | v-kit Hardy-Zuckerman 4 feline sarcoma viral oncogene homolog [Source:HGNC Symbol;Acc:6342]                                  |
| 5170 | ENSG00000144455 | 419.7131516 | -0.619370907 | 0.155821308 | 0.000254883 | SUMF1             | sulfatase modifying factor 1 [Source:HGNC Symbol;Acc:20376]                                                                  |
| 5171 | ENSG00000132846 | 135.5435371 | 1.086721764  | 0.273404122 | 0.000254938 | ZBED3             | zinc finger, BED-type containing 3 [Source:HGNC Symbol;Acc:20711]                                                            |
| 5172 | ENSG00000144741 | 173.1059194 | 0.958395473  | 0.241145049 | 0.000255349 | SLC25A26          | solute carrier family 25 (S-adenosylmethionine carrier), member 26 [Source:HGNC Symbol;Acc:20661]                            |
| 5173 | ENSG00000196284 | 132.1225864 | 1.097134478  | 0.276084281 | 0.00025576  | SUPT3H            | suppressor of Ty 3 homolog (S. cerevisiae) [Source:HGNC Symbol;Acc:11466]                                                    |
| 5174 | ENSG00000262641 | 21.5196357  | -2.163618962 | 0.544460349 | 0.00025576  | RP11-124L9.6      |                                                                                                                              |

|      |                 |             |              |             |             |                |                                                                                                   |
|------|-----------------|-------------|--------------|-------------|-------------|----------------|---------------------------------------------------------------------------------------------------|
| 5175 | ENSG00000230456 | 71.69263438 | 1.43737296   | 0.361723821 | 0.000255928 | DDR1           | discoidin domain receptor tyrosine kinase 1 [Source:HGNC Symbol;Acc:2730]                         |
| 5176 | ENSG00000221829 | 437.6891072 | -0.621085386 | 0.156305772 | 0.000256037 | FANCG          | Fanconi anemia, complementation group G [Source:HGNC Symbol;Acc:3588]                             |
| 5177 | ENSG00000012822 | 5617.655904 | 0.265381354  | 0.066802348 | 0.000256949 | CALCOCO1       | calcium binding and coiled-coil domain 1 [Source:HGNC Symbol;Acc:29306]                           |
| 5178 | ENSG00000186312 | 173.9224953 | -0.94778232  | 0.238606938 | 0.000257425 | CA5BP1         | carbonic anhydrase VB pseudogene 1 [Source:HGNC Symbol;Acc:29544]                                 |
| 5179 | ENSG00000101639 | 1870.858753 | -0.356780556 | 0.089832776 | 0.00025796  | CEP192         | centrosomal protein 192kDa [Source:HGNC Symbol;Acc:25515]                                         |
| 5180 | ENSG00000175220 | 2725.581397 | -0.28807378  | 0.072575173 | 0.000260404 | ARHGAP1        | Rho GTPase activating protein 1 [Source:HGNC Symbol;Acc:673]                                      |
| 5181 | ENSG00000143858 | 233.1088672 | -0.82274043  | 0.207282392 | 0.000260506 | SYT2           | synaptotagmin II [Source:HGNC Symbol;Acc:11510]                                                   |
| 5182 | ENSG00000164237 | 98.76710165 | -1.202577593 | 0.30302594  | 0.000261127 | CMBL           | carboxymethylenebutenolidase homolog (Pseudomonas) [Source:HGNC Symbol;Acc:25090]                 |
| 5183 | ENSG00000177479 | 2071.110207 | 0.350517653  | 0.088331841 | 0.000261484 | ARIH2          | ariadne RBR E3 ubiquitin protein ligase 2 [Source:HGNC Symbol;Acc:690]                            |
| 5184 | ENSG00000229598 | 29.07906168 | -1.874214787 | 0.472330223 | 0.000261624 | PRDX3P1        | peroxiredoxin 3 pseudogene 1 [Source:HGNC Symbol;Acc:39264]                                       |
| 5185 | ENSG00000161958 | 83.69737556 | -1.250290401 | 0.315137412 | 0.000262173 | FGF11          | fibroblast growth factor 11 [Source:HGNC Symbol;Acc:3667]                                         |
| 5186 | ENSG00000269849 | 84.78517447 | 1.295496221  | 0.326533211 | 0.000262173 | MAMLD1         | mastermind-like domain containing 1 [Source:HGNC Symbol;Acc:2568]                                 |
| 5187 | ENSG00000114013 | 262.3305536 | 0.856687662  | 0.215967014 | 0.000262864 | CD86           | CD86 molecule [Source:HGNC Symbol;Acc:1705]                                                       |
| 5188 | ENSG00000171681 | 2192.959167 | -0.320008163 | 0.080677624 | 0.000263087 | ATF7IP         | activating transcription factor 7 interacting protein [Source:HGNC Symbol;Acc:20092]              |
| 5189 | ENSG00000174151 | 1294.380224 | 0.413775286  | 0.10433376  | 0.000263725 | CYB561D1       | cytochrome b561 family, member D1 [Source:HGNC Symbol;Acc:26804]                                  |
| 5190 | ENSG00000129071 | 2411.491107 | -0.345337235 | 0.087087901 | 0.000264221 | MBD4           | methyl-CpG binding domain protein 4 [Source:HGNC Symbol;Acc:6919]                                 |
| 5191 | ENSG00000068878 | 1551.326665 | 0.424697197  | 0.107106593 | 0.000264396 | PSME4          | proteasome (prosome, macropain) activator subunit 4 [Source:HGNC Symbol;Acc:20635]                |
| 5192 | ENSG00000162399 | 49.38831867 | -1.562631202 | 0.394184677 | 0.000265424 | BSND           | Bartter syndrome, infantile, with sensorineural deafness (Barttin) [Source:HGNC Symbol;Acc:16512] |
| 5193 | ENSG00000198695 | 23681.22383 | 0.21929914   | 0.055321411 | 0.000265506 | MT-ND6         | mitochondrially encoded NADH dehydrogenase 6 [Source:HGNC Symbol;Acc:7462]                        |
| 5194 | ENSG00000169372 | 267.3100202 | 0.758017375  | 0.191249764 | 0.00026612  | CRADD          | CASP2 and RIPK1 domain containing adaptor with death domain [Source:HGNC Symbol;Acc:2340]         |
| 5195 | ENSG00000171611 | 20.99475972 | 2.107906286  | 0.532052211 | 0.000267918 | PTCRA          | pre T-cell antigen receptor alpha [Source:HGNC Symbol;Acc:21290]                                  |
| 5196 | ENSG00000187243 | 23.57717763 | 2.105068544  | 0.531357494 | 0.000268047 | MAGED4B        | melanoma antigen family D, 4B [Source:HGNC Symbol;Acc:22880]                                      |
| 5197 | ENSG00000149932 | 1200.345859 | 0.443933293  | 0.112060959 | 0.000268155 | TMEM219        | transmembrane protein 219 [Source:HGNC Symbol;Acc:25201]                                          |
| 5198 | ENSG00000174093 | 1134.961521 | -0.428670676 | 0.108209379 | 0.000268155 | RP11-1407O15.2 | TBC1 domain family member 3 [Source:UniProtKB/TrEMBL;Acc:ESRJ24]                                  |
| 5199 | ENSG00000268682 | 23.57495015 | 2.104745622  | 0.531364367 | 0.000268633 | MAGED4B        | melanoma antigen family D, 4B [Source:HGNC Symbol;Acc:22880]                                      |
| 5200 | ENSG00000180626 | 214.5710515 | 0.92400498   | 0.233304995 | 0.000269166 | ZNF594         | zinc finger protein 594 [Source:HGNC Symbol;Acc:29392]                                            |
| 5201 | ENSG00000002933 | 124.78284   | 1.325081597  | 0.334625343 | 0.000269798 | TMEM176A       | transmembrane protein 176A [Source:HGNC Symbol;Acc:24930]                                         |
| 5202 | ENSG00000261674 | 1134.804008 | -0.42864099  | 0.108253011 | 0.000270056 | RP11-1407O15.2 | TBC1 domain family member 3 [Source:UniProtKB/TrEMBL;Acc:ESRJ24]                                  |



|      |                 |             |              |             |             |              |                                                                                                                             |
|------|-----------------|-------------|--------------|-------------|-------------|--------------|-----------------------------------------------------------------------------------------------------------------------------|
| 5203 | ENSG00000260309 | 22.21691909 | 2.064876794  | 0.52149053  | 0.000270066 | TRBV2        | T cell receptor beta variable 2 [Source:HGNC Symbol;Acc:12195]                                                              |
| 5204 | ENSG00000112378 | 37.70473247 | 1.839686813  | 0.464856587 | 0.00027232  | PERP         | PERP, TP53 apoptosis effector [Source:HGNC Symbol;Acc:17637]                                                                |
| 5205 | ENSG00000049249 | 288.2594176 | 0.797763242  | 0.201587384 | 0.000272385 | TNFRSF9      | tumor necrosis factor receptor superfamily, member 9 [Source:HGNC Symbol;Acc:11924]                                         |
| 5206 | ENSG00000117318 | 74.62291954 | 1.354376256  | 0.342240048 | 0.000272385 | ID3          | inhibitor of DNA binding 3, dominant negative helix-loop-helix protein [Source:HGNC Symbol;Acc:5362]                        |
| 5207 | ENSG00000017483 | 270.7654206 | -0.849575172 | 0.214723584 | 0.000273232 | SLC38A5      | solute carrier family 38, member 5 [Source:HGNC Symbol;Acc:18070]                                                           |
| 5208 | ENSG00000112799 | 195.8642161 | 0.890943327  | 0.225204309 | 0.000273655 | LY86         | lymphocyte antigen 86 [Source:HGNC Symbol;Acc:16837]                                                                        |
| 5209 | ENSG00000267556 | 97.2655641  | 1.261629028  | 0.31890425  | 0.000273655 | SARM1        | sterile alpha and TIR motif containing 1 [Source:HGNC Symbol;Acc:17074]                                                     |
| 5210 | ENSG00000174175 | 152.6521281 | 1.029185782  | 0.260303825 | 0.000276306 | SELP         | selectin P (granule membrane protein 140kDa, antigen CD62) [Source:HGNC Symbol;Acc:10721]                                   |
| 5211 | ENSG00000129083 | 2222.083278 | -0.298545101 | 0.075532481 | 0.000277698 | COPB1        | coatamer protein complex, subunit beta 1 [Source:HGNC Symbol;Acc:2231]                                                      |
| 5212 | ENSG00000135919 | 68.96192149 | -1.370434775 | 0.346812135 | 0.000278831 | SERPINE2     | serpin peptidase inhibitor, clade E (nexin, plasminogen activator inhibitor type 1), member 2 [Source:HGNC Symbol;Acc:8951] |
| 5213 | ENSG00000187808 | 229.4565523 | -0.800284218 | 0.202654396 | 0.000281716 | SOWAHD       | sosondowah ankyrin repeat domain family member D [Source:HGNC Symbol;Acc:32960]                                             |
| 5214 | ENSG00000114166 | 2131.34184  | -0.324739973 | 0.082236197 | 0.000281827 | KAT2B        | K(lysine) acetyltransferase 2B [Source:HGNC Symbol;Acc:8638]                                                                |
| 5215 | ENSG00000172465 | 105.798943  | 1.166167014  | 0.295327663 | 0.000281946 | TCEAL1       | transcription elongation factor A (SII)-like 1 [Source:HGNC Symbol;Acc:11616]                                               |
| 5216 | ENSG00000151490 | 75.98647035 | 1.377767037  | 0.348957491 | 0.000282463 | PTPRO        | protein tyrosine phosphatase, receptor type, O [Source:HGNC Symbol;Acc:9678]                                                |
| 5217 | ENSG00000117751 | 726.1889079 | 0.485481131  | 0.122983783 | 0.000283255 | PPP1R8       | protein phosphatase 1, regulatory subunit 8 [Source:HGNC Symbol;Acc:9296]                                                   |
| 5218 | ENSG00000198157 | 83.2564989  | -1.291727479 | 0.327416734 | 0.000285948 | HMGNS        | high mobility group nucleosome binding domain 5 [Source:HGNC Symbol;Acc:8013]                                               |
| 5219 | ENSG00000113580 | 2889.279709 | 0.295465759  | 0.074931694 | 0.000288343 | NR3C1        | nuclear receptor subfamily 3, group C, member 1 (glucocorticoid receptor) [Source:HGNC Symbol;Acc:7978]                     |
| 5220 | ENSG00000153786 | 2774.334478 | -0.295725692 | 0.074997937 | 0.000288343 | ZDHC7        | zinc finger, DHC-type containing 7 [Source:HGNC Symbol;Acc:18459]                                                           |
| 5221 | ENSG00000261309 | 8.369586222 | -2.225150422 | 0.564447729 | 0.000289371 | KCNJ12       | potassium inwardly-rectifying channel, subfamily J, member 12 [Source:HGNC Symbol;Acc:6258]                                 |
| 5222 | ENSG00000184185 | 8.369586222 | -2.225150422 | 0.564447729 | 0.000289371 | KCNJ12       | potassium inwardly-rectifying channel, subfamily J, member 12 [Source:HGNC Symbol;Acc:6258]                                 |
| 5223 | ENSG00000187531 | 2116.715022 | -0.388925694 | 0.0987648   | 0.000294517 | SIRT7        | sirtuin 7 [Source:HGNC Symbol;Acc:14935]                                                                                    |
| 5224 | ENSG00000130592 | 18510.59506 | -0.272644476 | 0.069262932 | 0.000296342 | LSP1         | lymphocyte-specific protein 1 [Source:HGNC Symbol;Acc:6707]                                                                 |
| 5225 | ENSG00000127870 | 824.8116848 | 0.471118888  | 0.119686011 | 0.000296383 | RNF6         | ring finger protein (C3H2C3 type) 6 [Source:HGNC Symbol;Acc:10069]                                                          |
| 5226 | ENSG00000259529 | 297.8210253 | -0.719593001 | 0.182834879 | 0.000296989 | RP11-468E2.4 | E3 ubiquitin-protein ligase RNF31 [Source:UniProtKB/TrEMBL;Acc:H0YM83]                                                      |
| 5227 | ENSG00000158874 | 24.8468013  | -2.021373633 | 0.513677944 | 0.000297743 | APOA2        | apolipoprotein A-II [Source:HGNC Symbol;Acc:601]                                                                            |
| 5228 | ENSG00000185127 | 652.217012  | 0.522210243  | 0.132728191 | 0.000298512 | C6orf120     | chromosome 6 open reading frame 120 [Source:HGNC Symbol;Acc:21247]                                                          |
| 5229 | ENSG00000122884 | 570.1163392 | -0.534521747 | 0.135862153 | 0.000298627 | P4HA1        | prolyl 4-hydroxylase, alpha polypeptide I [Source:HGNC Symbol;Acc:8546]                                                     |
| 5230 | ENSG00000133069 | 104.1322176 | 1.155493731  | 0.293736221 | 0.00029921  | TMCC2        | transmembrane and coiled-coil domain family 2 [Source:HGNC Symbol;Acc:24239]                                                |

|      |                 |             |              |             |             |              |                                                                                                      |
|------|-----------------|-------------|--------------|-------------|-------------|--------------|------------------------------------------------------------------------------------------------------|
| 5231 | ENSG00000139921 | 761.6673584 | -0.459836282 | 0.11690309  | 0.000299524 | TMX1         | thioredoxin-related transmembrane protein 1 [Source:HGNC Symbol;Acc:15487]                           |
| 5232 | ENSG00000133789 | 836.6918954 | 0.488174096  | 0.124117959 | 0.000299886 | SWAP70       | SWAP switching B-cell complex 70kDa subunit [Source:HGNC Symbol;Acc:17070]                           |
| 5233 | ENSG00000160223 | 180.0641537 | 1.054536208  | 0.2681907   | 0.000301214 | ICOSLG       | inducible T-cell co-stimulator ligand [Source:HGNC Symbol;Acc:17087]                                 |
| 5234 | ENSG00000107821 | 27.19589022 | 1.956801232  | 0.497830047 | 0.000302887 | KAZALD1      | Kazal-type serine peptidase inhibitor domain 1 [Source:HGNC Symbol;Acc:25460]                        |
| 5235 | ENSG00000138698 | 591.1972751 | 0.589262985  | 0.149927054 | 0.000303245 | RAP1GDS1     | RAP1, GTP-GDP dissociation stimulator 1 [Source:HGNC Symbol;Acc:9859]                                |
| 5236 | ENSG00000071189 | 1303.391949 | -0.398934985 | 0.101508776 | 0.000303537 | SNX13        | sorting nexin 13 [Source:HGNC Symbol;Acc:21335]                                                      |
| 5237 | ENSG00000160131 | 708.1318143 | -0.490759146 | 0.124884802 | 0.000303933 | VMA21        | VMA21 vacuolar H <sup>+</sup> -ATPase homolog (S. cerevisiae) [Source:HGNC Symbol;Acc:22082]         |
| 5238 | ENSG00000153815 | 2485.259569 | -0.294775182 | 0.075030835 | 0.000305108 | CMIP         | c-Maf inducing protein [Source:HGNC Symbol;Acc:24319]                                                |
| 5239 | ENSG00000159214 | 61.98508892 | 1.445055689  | 0.367845078 | 0.000305412 | CCDC24       | coiled-coil domain containing 24 [Source:HGNC Symbol;Acc:28688]                                      |
| 5240 | ENSG00000090432 | 410.1662316 | 0.640669736  | 0.163107603 | 0.000306039 | MUL1         | mitochondrial E3 ubiquitin protein ligase 1 [Source:HGNC Symbol;Acc:25762]                           |
| 5241 | ENSG00000077585 | 184.4451354 | 0.944573619  | 0.240498109 | 0.000306393 | GPR137B      | G protein-coupled receptor 137B [Source:HGNC Symbol;Acc:11862]                                       |
| 5242 | ENSG00000141084 | 920.1145037 | -0.457023465 | 0.116366461 | 0.00030649  | RANBP10      | RAN binding protein 10 [Source:HGNC Symbol;Acc:29285]                                                |
| 5243 | ENSG00000134480 | 694.0511775 | -0.508395555 | 0.129452494 | 0.000306654 | CCNH         | cyclin H [Source:HGNC Symbol;Acc:1594]                                                               |
| 5244 | ENSG00000105722 | 434.0922708 | 0.642784135  | 0.163698754 | 0.000307421 | ERF          | Ets2 repressor factor [Source:HGNC Symbol;Acc:3444]                                                  |
| 5245 | ENSG00000171643 | 169.4074543 | 0.996945737  | 0.25390363  | 0.000307561 | S100Z        | S100 calcium binding protein Z [Source:HGNC Symbol;Acc:30367]                                        |
| 5246 | ENSG00000140983 | 1315.954785 | 0.451111923  | 0.11489623  | 0.000307781 | RHOT2        | ras homolog family member T2 [Source:HGNC Symbol;Acc:21169]                                          |
| 5247 | ENSG00000224870 | 345.9635299 | 0.66913408   | 0.170429257 | 0.000307832 | RP4-758J18.2 | HCG20425, isoform CRA_a; Uncharacterized protein; cDNA FLJ53815 [Source:UniProtKB/TrEMBL;Acc:B4DNA4] |
| 5248 | ENSG00000130560 | 858.2045445 | -0.484500013 | 0.123453756 | 0.000309855 | UBAC1        | UBA domain containing 1 [Source:HGNC Symbol;Acc:30221]                                               |
| 5249 | ENSG00000111962 | 73.77369139 | 1.676123559  | 0.427279956 | 0.000312083 | UST          | uronyl-2-sulfotransferase [Source:HGNC Symbol;Acc:17223]                                             |
| 5250 | ENSG00000151067 | 41.62537565 | 1.7891256    | 0.456138992 | 0.000312607 | CACNA1C      | calcium channel, voltage-dependent, L type, alpha 1C subunit [Source:HGNC Symbol;Acc:1390]           |
| 5251 | ENSG00000186767 | 113.8847797 | -1.078226988 | 0.274926463 | 0.000313134 | SPIN4        | spindlin family, member 4 [Source:HGNC Symbol;Acc:27040]                                             |
| 5252 | ENSG00000260143 | 18.61716868 | 2.133438087  | 0.544151993 | 0.000314648 | TRBV13       | T cell receptor beta variable 13 [Source:HGNC Symbol;Acc:12188]                                      |
| 5253 | ENSG00000111110 | 150.4042927 | -0.976784681 | 0.249254073 | 0.000316992 | PPM1H        | protein phosphatase, Mg <sup>2+</sup> /Mn <sup>2+</sup> dependent, 1H [Source:HGNC Symbol;Acc:18583] |
| 5254 | ENSG00000134709 | 131.6558635 | 1.06540488   | 0.271871297 | 0.000316994 | HOOK1        | hook microtubule-tethering protein 1 [Source:HGNC Symbol;Acc:19884]                                  |
| 5255 | ENSG00000111339 | 18.82505529 | -2.083881615 | 0.531874988 | 0.000317977 | ART4         | ADP-ribosyltransferase 4 (Dombrock blood group) [Source:HGNC Symbol;Acc:726]                         |
| 5256 | ENSG00000096654 | 169.9761298 | 0.951102961  | 0.242768946 | 0.000318263 | ZNF184       | zinc finger protein 184 [Source:HGNC Symbol;Acc:12975]                                               |
| 5257 | ENSG00000174851 | 161.2730997 | 0.956371783  | 0.244248463 | 0.000321065 | YIF1A        | Yip1 interacting factor homolog A (S. cerevisiae) [Source:HGNC Symbol;Acc:16688]                     |
| 5258 | ENSG00000167565 | 592.592054  | -0.518254374 | 0.132372185 | 0.000321588 | SERTAD3      | SERTA domain containing 3 [Source:HGNC Symbol;Acc:17931]                                             |

|      |                 |             |              |             |             |           |                                                                                                          |
|------|-----------------|-------------|--------------|-------------|-------------|-----------|----------------------------------------------------------------------------------------------------------|
| 5259 | ENSG00000175221 | 308.9324156 | 0.806839335  | 0.206086639 | 0.000321635 | MED16     | mediator complex subunit 16 [Source:HGNC Symbol;Acc:17556]                                               |
| 5260 | ENSG00000243678 | 906.8796817 | 0.458223939  | 0.11705485  | 0.000322162 | NME1-NME2 | NME1-NME2 readthrough [Source:HGNC Symbol;Acc:33531]                                                     |
| 5261 | ENSG00000099783 | 3390.317128 | -0.349265069 | 0.089234051 | 0.000322869 | HNRNPM    | heterogeneous nuclear ribonucleoprotein M [Source:HGNC Symbol;Acc:5046]                                  |
| 5262 | ENSG00000080947 | 231.1232255 | 0.79452622   | 0.203046375 | 0.000324136 | CROCCP3   | ciliary rootlet coiled-coil, rootletin pseudogene 3 [Source:HGNC Symbol;Acc:29405]                       |
| 5263 | ENSG00000268642 | 1332.497975 | 0.377005829  | 0.096347097 | 0.000324136 | HNRNPH2   | heterogeneous nuclear ribonucleoprotein H2 (H') [Source:HGNC Symbol;Acc:5042]                            |
| 5264 | ENSG00000123358 | 128.247212  | -1.253592944 | 0.320425017 | 0.000325035 | NR4A1     | nuclear receptor subfamily 4, group A, member 1 [Source:HGNC Symbol;Acc:7980]                            |
| 5265 | ENSG00000126945 | 1332.637317 | 0.377003289  | 0.096378228 | 0.00032575  | HNRNPH2   | heterogeneous nuclear ribonucleoprotein H2 (H') [Source:HGNC Symbol;Acc:5042]                            |
| 5266 | ENSG00000196517 | 22.05952849 | -1.970256856 | 0.503724347 | 0.000326129 | SLC6A9    | solute carrier family 6 (neurotransmitter transporter, glycine), member 9 [Source:HGNC Symbol;Acc:11056] |
| 5267 | ENSG00000218497 | 137.8069731 | 1.004648237  | 0.256996518 | 0.000329036 | ZNF84     | Zinc finger protein 84 [Source:UniProtKB/TrEMBL;Acc:F5H1B1]                                              |
| 5268 | ENSG00000157570 | 164.5504418 | 1.112700805  | 0.284747973 | 0.000331051 | TSPAN18   | tetraspanin 18 [Source:HGNC Symbol;Acc:20660]                                                            |
| 5269 | ENSG00000181035 | 344.2779426 | 0.736361804  | 0.188459513 | 0.000331537 | SLC25A42  | solute carrier family 25, member 42 [Source:HGNC Symbol;Acc:28380]                                       |
| 5270 | ENSG00000150403 | 839.0542434 | -0.467155616 | 0.119575154 | 0.000332124 | TMCO3     | transmembrane and coiled-coil domains 3 [Source:HGNC Symbol;Acc:20329]                                   |
| 5271 | ENSG00000255163 | 115.2292071 | 1.197229326  | 0.306584101 | 0.000334452 | HSPE1P18  | heat shock 10kDa protein 1 pseudogene 18 [Source:HGNC Symbol;Acc:49337]                                  |
| 5272 | ENSG00000226710 | 231.3534423 | 0.791037633  | 0.202587226 | 0.000334919 | C6orf48   | chromosome 6 open reading frame 48 [Source:HGNC Symbol;Acc:19078]                                        |
| 5273 | ENSG00000169021 | 1234.734066 | -0.390487642 | 0.100030795 | 0.000336246 | UQCRFS1   | ubiquinol-cytochrome c reductase, Rieske iron-sulfur polypeptide 1 [Source:HGNC Symbol;Acc:12587]        |
| 5274 | ENSG00000198040 | 446.9750379 | 0.687788395  | 0.176227903 | 0.000337351 | ZNF84     | zinc finger protein 84 [Source:HGNC Symbol;Acc:13159]                                                    |
| 5275 | ENSG00000149573 | 447.3940758 | -0.596044731 | 0.152753092 | 0.000338382 | MPZL2     | myelin protein zero-like 2 [Source:HGNC Symbol;Acc:3496]                                                 |
| 5276 | ENSG00000170379 | 240.4906976 | 0.790530854  | 0.202596071 | 0.000338382 | FAM115C   | family with sequence similarity 115, member C [Source:HGNC Symbol;Acc:26878]                             |
| 5277 | ENSG00000205583 | 631.5923123 | -0.533097625 | 0.136623583 | 0.000338402 | STAG3L1   | stromal antigen 3-like 1 (pseudogene) [Source:HGNC Symbol;Acc:33852]                                     |
| 5278 | ENSG00000108479 | 117.5124059 | 1.265654855  | 0.3243942   | 0.000338826 | GALK1     | galactokinase 1 [Source:HGNC Symbol;Acc:4118]                                                            |
| 5279 | ENSG00000160908 | 1238.301497 | -0.390003517 | 0.099972402 | 0.00033944  | ZNF394    | zinc finger protein 394 [Source:HGNC Symbol;Acc:18832]                                                   |
| 5280 | ENSG00000142733 | 132.1278568 | 1.1845315    | 0.303662378 | 0.000339788 | MAP3K6    | mitogen-activated protein kinase kinase kinase 6 [Source:HGNC Symbol;Acc:6858]                           |
| 5281 | ENSG00000171606 | 1190.084384 | 0.401326942  | 0.102902942 | 0.000340798 | ZNF274    | zinc finger protein 274 [Source:HGNC Symbol;Acc:13068]                                                   |
| 5282 | ENSG00000164627 | 77.03337948 | -1.381466783 | 0.354264626 | 0.000341466 | KIF6      | kinesin family member 6 [Source:HGNC Symbol;Acc:21202]                                                   |
| 5283 | ENSG00000140688 | 807.9371911 | 0.447427564  | 0.114825029 | 0.000345556 | C16orf58  | chromosome 16 open reading frame 58 [Source:HGNC Symbol;Acc:25848]                                       |
| 5284 | ENSG00000134371 | 779.0876204 | -0.478278965 | 0.122794891 | 0.000347846 | CDC73     | cell division cycle 73 [Source:HGNC Symbol;Acc:16783]                                                    |
| 5285 | ENSG00000165322 | 721.2156832 | -0.466813188 | 0.119852089 | 0.000347846 | ARHGAP12  | Rho GTPase activating protein 12 [Source:HGNC Symbol;Acc:16348]                                          |
| 5286 | ENSG00000006712 | 1116.777977 | -0.397902814 | 0.102169941 | 0.000348289 | PAF1      | Paf1, RNA polymerase II associated factor, homolog (S. cerevisiae) [Source:HGNC Symbol;Acc:25459]        |

|      |                 |             |              |             |             |               |                                                                                                     |
|------|-----------------|-------------|--------------|-------------|-------------|---------------|-----------------------------------------------------------------------------------------------------|
| 5287 | ENSG00000268762 | 113.7919008 | -1.069493329 | 0.274615597 | 0.000348289 | SPIN4         | spindlin family, member 4 [Source:HGNC Symbol;Acc:27040]                                            |
| 5288 | ENSG00000037757 | 644.4433147 | 0.512547254  | 0.13162653  | 0.000349028 | MRI1          | methylthioribose-1-phosphate isomerase 1 [Source:HGNC Symbol;Acc:28469]                             |
| 5289 | ENSG00000212743 | 106.0865163 | -1.188384983 | 0.305192147 | 0.000349048 | DKFZP667F0711 |                                                                                                     |
| 5290 | ENSG00000121067 | 1354.05474  | 0.388851513  | 0.099869293 | 0.000349395 | SPOP          | speckle-type POZ protein [Source:HGNC Symbol;Acc:11254]                                             |
| 5291 | ENSG00000099284 | 33.10147765 | 1.851600187  | 0.475648066 | 0.000350498 | H2AFY2        | H2A histone family, member Y2 [Source:HGNC Symbol;Acc:14453]                                        |
| 5292 | ENSG00000137776 | 3307.479626 | -0.267171834 | 0.068640787 | 0.00035112  | SLTM          | SAFB-like, transcription modulator [Source:HGNC Symbol;Acc:20709]                                   |
| 5293 | ENSG00000175463 | 5004.530626 | 0.353848946  | 0.090937233 | 0.000352772 | TBC1D10C      | TBC1 domain family, member 10C [Source:HGNC Symbol;Acc:24702]                                       |
| 5294 | ENSG00000198089 | 1482.003657 | 0.401752585  | 0.103287239 | 0.00035485  | SFI1          | Sfi1 homolog, spindle assembly associated (yeast) [Source:HGNC Symbol;Acc:29064]                    |
| 5295 | ENSG00000115947 | 1164.352546 | -0.411829633 | 0.105899801 | 0.000355957 | ORC4          | origin recognition complex, subunit 4 [Source:HGNC Symbol;Acc:8490]                                 |
| 5296 | ENSG00000137801 | 303.0791263 | 0.883319828  | 0.227148962 | 0.00035609  | THBS1         | thrombospondin 1 [Source:HGNC Symbol;Acc:11785]                                                     |
| 5297 | ENSG00000139697 | 1762.347729 | -0.328623982 | 0.084564173 | 0.000359907 | SBN01         | strawberry notch homolog 1 (Drosophila) [Source:HGNC Symbol;Acc:22973]                              |
| 5298 | ENSG00000135090 | 2197.507938 | -0.297763535 | 0.076652902 | 0.000362098 | TAOK3         | TAO kinase 3 [Source:HGNC Symbol;Acc:18133]                                                         |
| 5299 | ENSG00000182118 | 47.83763733 | -1.541066731 | 0.396840779 | 0.00036387  | FAM89A        | family with sequence similarity 89, member A [Source:HGNC Symbol;Acc:25057]                         |
| 5300 | ENSG00000204038 | 143.6834448 | -0.97420449  | 0.250877862 | 0.000364034 | AL359195.1    | Uncharacterized protein; cDNA FLJ46261 fis, clone TEST14025062 [Source:UniProtKB/TrEMBL;Acc:Q6ZRL6] |
| 5301 | ENSG00000187735 | 1199.76754  | 0.398894829  | 0.102725698 | 0.000364079 | TCEA1         | transcription elongation factor A (SII), 1 [Source:HGNC Symbol;Acc:11612]                           |
| 5302 | ENSG00000034152 | 3939.077942 | -0.325698578 | 0.083883511 | 0.000364547 | MAP2K3        | mitogen-activated protein kinase kinase 3 [Source:HGNC Symbol;Acc:6843]                             |
| 5303 | ENSG00000204264 | 385.332894  | 0.825744656  | 0.212675093 | 0.000364552 | PSMB8         | proteasome (prosome, macropain) subunit, beta type, 8 [Source:HGNC Symbol;Acc:9545]                 |
| 5304 | ENSG00000236443 | 385.3326371 | 0.825743096  | 0.212675158 | 0.000364552 | PSMB8         | proteasome (prosome, macropain) subunit, beta type, 8 [Source:HGNC Symbol;Acc:9545]                 |
| 5305 | ENSG00000226201 | 385.332491  | 0.825735764  | 0.21267559  | 0.000364552 | PSMB8         | proteasome (prosome, macropain) subunit, beta type, 8 [Source:HGNC Symbol;Acc:9545]                 |
| 5306 | ENSG00000107643 | 931.0917512 | 0.547714932  | 0.14114431  | 0.000367609 | MAPK8         | mitogen-activated protein kinase 8 [Source:HGNC Symbol;Acc:6881]                                    |
| 5307 | ENSG00000139354 | 63.02339629 | -1.379615777 | 0.355607306 | 0.000368942 | GAS2L3        | growth arrest-specific 2 like 3 [Source:HGNC Symbol;Acc:27475]                                      |
| 5308 | ENSG00000150455 | 369.6163882 | -0.649035219 | 0.167332757 | 0.000370232 | TIRAP         | toll-interleukin 1 receptor (TIR) domain containing adaptor protein [Source:HGNC Symbol;Acc:17192]  |
| 5309 | ENSG00000163554 | 644.4962275 | -1.935310843 | 0.499037074 | 0.000371106 | SPTA1         | spectrin, alpha, erythrocytic 1 (elliptocytosis 2) [Source:HGNC Symbol;Acc:11272]                   |
| 5310 | ENSG00000178860 | 19.97842391 | 2.067757639  | 0.533217825 | 0.000371349 | MSC           | musculin [Source:HGNC Symbol;Acc:7321]                                                              |
| 5311 | ENSG00000197860 | 791.3632948 | -0.452483562 | 0.116692465 | 0.000371756 | SGTB          | small glutamine-rich tetratricopeptide repeat (TPR)-containing, beta [Source:HGNC Symbol;Acc:23567] |
| 5312 | ENSG00000270505 | 26.23528366 | 1.945616027  | 0.501841299 | 0.000372631 | IGHV1OR15-1   | immunoglobulin heavy variable 1/OR15-1 (non-functional) [Source:HGNC Symbol;Acc:5563]               |
| 5313 | ENSG00000162402 | 2786.711813 | -0.270000137 | 0.069644484 | 0.000372745 | USP24         | ubiquitin specific peptidase 24 [Source:HGNC Symbol;Acc:12623]                                      |
| 5314 | ENSG00000263113 | 920.723828  | -0.441240777 | 0.113818079 | 0.000372851 | RP11-124L9.2  |                                                                                                     |

|      |                 |             |              |             |             |               |                                                                                        |
|------|-----------------|-------------|--------------|-------------|-------------|---------------|----------------------------------------------------------------------------------------|
| 5315 | ENSG00000151414 | 1899.397907 | 0.351421972  | 0.090652731 | 0.000373005 | NEK7          | NIMA-related kinase 7 [Source:HGNC Symbol;Acc:13386]                                   |
| 5316 | ENSG00000159261 | 56.67547362 | -1.820024521 | 0.469502649 | 0.000373055 | CLDN14        | claudin 14 [Source:HGNC Symbol;Acc:2035]                                               |
| 5317 | ENSG00000166188 | 445.6137069 | 0.594904805  | 0.153477886 | 0.000373499 | ZNF319        | zinc finger protein 319 [Source:HGNC Symbol;Acc:13644]                                 |
| 5318 | ENSG00000187537 | 41.90300153 | -1.594262608 | 0.41141354  | 0.00037508  | POTEM         | POTE ankyrin domain family, member M [Source:HGNC Symbol;Acc:37096]                    |
| 5319 | ENSG00000243199 | 127.3037608 | 1.034276424  | 0.267026719 | 0.000377705 | RP11-408P14.1 |                                                                                        |
| 5320 | ENSG00000151612 | 162.5970105 | 1.020136689  | 0.263376956 | 0.000377705 | ZNF827        | zinc finger protein 827 [Source:HGNC Symbol;Acc:27193]                                 |
| 5321 | ENSG00000167377 | 236.2662203 | 0.843170964  | 0.217828616 | 0.000381521 | ZNF23         | zinc finger protein 23 [Source:HGNC Symbol;Acc:13023]                                  |
| 5322 | ENSG00000103512 | 595.8061482 | 0.591631823  | 0.15289265  | 0.000383347 | NOMO1         | NODAL modulator 1 [Source:HGNC Symbol;Acc:30060]                                       |
| 5323 | ENSG00000121579 | 2112.937994 | 0.323961816  | 0.083722462 | 0.000383459 | NAA50         | N(alpha)-acetyltransferase 50, NatE catalytic subunit [Source:HGNC Symbol;Acc:29533]   |
| 5324 | ENSG00000211785 | 24.94828809 | 1.984597891  | 0.512981202 | 0.00038452  | TRAV12-1      | T cell receptor alpha variable 12-1 [Source:HGNC Symbol;Acc:12105]                     |
| 5325 | ENSG00000211820 | 18.81084973 | 2.088244263  | 0.539800736 | 0.000384774 | TRAV41        | T cell receptor alpha variable 41 [Source:HGNC Symbol;Acc:12142]                       |
| 5326 | ENSG00000211786 | 26.83173091 | 1.962000249  | 0.507256487 | 0.000385776 | TRAV8-2       | T cell receptor alpha variable 8-2 [Source:HGNC Symbol;Acc:12147]                      |
| 5327 | ENSG00000183018 | 242.6650826 | -0.759056671 | 0.196364935 | 0.000389398 | SPNS2         | spinster homolog 2 (Drosophila) [Source:HGNC Symbol;Acc:26992]                         |
| 5328 | ENSG00000244627 | 335.4328844 | -0.741898601 | 0.191938173 | 0.000389709 | RP3-449O17.1  |                                                                                        |
| 5329 | ENSG00000206298 | 385.1520406 | 0.823936768  | 0.213206231 | 0.000390905 | PSMB8         | proteasome (prosome, macropain) subunit, beta type, 8 [Source:HGNC Symbol;Acc:9545]    |
| 5330 | ENSG00000163913 | 445.972389  | -0.606801359 | 0.157027416 | 0.000391159 | IFT122        | intraflagellar transport 122 homolog (Chlamydomonas) [Source:HGNC Symbol;Acc:13556]    |
| 5331 | ENSG00000230669 | 385.1513187 | 0.823886939  | 0.213212306 | 0.000391309 | PSMB8         | proteasome (prosome, macropain) subunit, beta type, 8 [Source:HGNC Symbol;Acc:9545]    |
| 5332 | ENSG00000102699 | 3341.721056 | -0.253474103 | 0.065610094 | 0.000392556 | PARP4         | poly (ADP-ribose) polymerase family, member 4 [Source:HGNC Symbol;Acc:271]             |
| 5333 | ENSG00000205423 | 948.2140506 | 0.450222675  | 0.116547489 | 0.000393033 | CNEP1R1       | CTD nuclear envelope phosphatase 1 regulatory subunit 1 [Source:HGNC Symbol;Acc:26759] |
| 5334 | ENSG00000049449 | 377.7593828 | 0.63472798   | 0.164338811 | 0.000394062 | RCN1          | reticulocalbin 1, EF-hand calcium binding domain [Source:HGNC Symbol;Acc:9934]         |
| 5335 | ENSG00000189292 | 15.96156068 | 2.120177805  | 0.549136933 | 0.00039623  | FAM150B       | family with sequence similarity 150, member B [Source:HGNC Symbol;Acc:27683]           |
| 5336 | ENSG00000111641 | 700.3401347 | 0.511407984  | 0.132496325 | 0.000398004 | NOP2          | NOP2 nucleolar protein [Source:HGNC Symbol;Acc:7867]                                   |
| 5337 | ENSG00000174501 | 245.239931  | -0.806318186 | 0.208945662 | 0.000399242 | ANKRD36C      | ankyrin repeat domain 36C [Source:HGNC Symbol;Acc:32946]                               |
| 5338 | ENSG00000229648 | 27.58386255 | -1.883948591 | 0.488242809 | 0.000399747 | AC016753.7    |                                                                                        |
| 5339 | ENSG00000214900 | 159.7405688 | 1.010601243  | 0.261918752 | 0.000399962 | C14orf182     | chromosome 14 open reading frame 182 [Source:HGNC Symbol;Acc:27503]                    |
| 5340 | ENSG00000145293 | 342.2310629 | 0.65556488   | 0.16991813  | 0.000400429 | ENOPH1        | enolase-phosphatase 1 [Source:HGNC Symbol;Acc:24599]                                   |
| 5341 | ENSG00000243910 | 29.3408308  | -1.802621525 | 0.467510348 | 0.000404191 | TUBA4B        | tubulin, alpha 4b (pseudogene) [Source:HGNC Symbol;Acc:18637]                          |
| 5342 | ENSG00000029725 | 1281.390738 | 0.390655711  | 0.101350772 | 0.000406265 | RABEP1        | rabaptin, RAB GTPase binding effector protein 1 [Source:HGNC Symbol;Acc:17677]         |

|      |                 |             |              |             |             |              |                                                                                                                                      |
|------|-----------------|-------------|--------------|-------------|-------------|--------------|--------------------------------------------------------------------------------------------------------------------------------------|
| 5343 | ENSG00000140006 | 347.8283775 | 0.693706269  | 0.180025277 | 0.000408034 | WDR89        | WD repeat domain 89 [Source:HGNC Symbol;Acc:20489]                                                                                   |
| 5344 | ENSG00000131471 | 656.1249517 | 0.571605424  | 0.148345095 | 0.000408239 | AOC3         | amine oxidase, copper containing 3 [Source:HGNC Symbol;Acc:550]                                                                      |
| 5345 | ENSG00000125772 | 6587.798406 | -0.23134323  | 0.060046279 | 0.000408939 | GPCPD1       | glycerophosphocholine phosphodiesterase GDE1 homolog ( <i>S. cerevisiae</i> ) [Source:HGNC Symbol;Acc:26957]                         |
| 5346 | ENSG00000159958 | 45.04528257 | 1.689825123  | 0.438746334 | 0.000410978 | TNFRSF13C    | tumor necrosis factor receptor superfamily, member 13C [Source:HGNC Symbol;Acc:17755]                                                |
| 5347 | ENSG00000109861 | 3998.885944 | 0.246670437  | 0.064049265 | 0.000411278 | CTSC         | cathepsin C [Source:HGNC Symbol;Acc:2528]                                                                                            |
| 5348 | ENSG00000134882 | 953.9974969 | 0.470221438  | 0.122097338 | 0.000411301 | UBAC2        | UBA domain containing 2 [Source:HGNC Symbol;Acc:20486]                                                                               |
| 5349 | ENSG00000123933 | 933.9189273 | 0.56871382   | 0.14768294  | 0.000411713 | MXD4         | MAX dimerization protein 4 [Source:HGNC Symbol;Acc:13906]                                                                            |
| 5350 | ENSG00000085788 | 675.4412952 | 0.49317074   | 0.128193778 | 0.000418136 | DDHD2        | DDHD domain containing 2 [Source:HGNC Symbol;Acc:29106]                                                                              |
| 5351 | ENSG00000186310 | 38.49476291 | 1.730034196  | 0.449717746 | 0.000418295 | NAP1L3       | nucleosome assembly protein 1-like 3 [Source:HGNC Symbol;Acc:7639]                                                                   |
| 5352 | ENSG00000157764 | 1788.730568 | -0.374984094 | 0.097502692 | 0.00042001  | BRAF         | v-raf murine sarcoma viral oncogene homolog B [Source:HGNC Symbol;Acc:1097]                                                          |
| 5353 | ENSG00000167792 | 1352.868279 | 0.358257074  | 0.093155418 | 0.000420077 | NDUFV1       | NADH dehydrogenase (ubiquinone) flavoprotein 1, 51kDa [Source:HGNC Symbol;Acc:7716]                                                  |
| 5354 | ENSG00000144395 | 109.5466471 | -1.2163197   | 0.316369579 | 0.00042203  | CCDC150      | coiled-coil domain containing 150 [Source:HGNC Symbol;Acc:26834]                                                                     |
| 5355 | ENSG00000130382 | 278.9726193 | 0.884551257  | 0.230133264 | 0.000423621 | MLLT1        | myeloid/lymphoid or mixed-lineage leukemia (trithorax homolog, <i>Drosophila</i> ); translocated to, 1 [Source:HGNC Symbol;Acc:7134] |
| 5356 | ENSG00000167775 | 178.9547017 | 1.010457034  | 0.262897237 | 0.000423722 | CD320        | CD320 molecule [Source:HGNC Symbol;Acc:16692]                                                                                        |
| 5357 | ENSG00000213253 | 11.26302869 | -2.175570042 | 0.566143548 | 0.000424949 | CTC-250I14.1 |                                                                                                                                      |
| 5358 | ENSG00000135148 | 2322.998393 | -0.303540844 | 0.079004468 | 0.000426112 | TRAFD1       | TRAF-type zinc finger domain containing 1 [Source:HGNC Symbol;Acc:24808]                                                             |
| 5359 | ENSG00000138095 | 1246.86711  | 0.392540694  | 0.102176544 | 0.000426525 | LRPPRC       | leucine-rich pentatricopeptide repeat containing [Source:HGNC Symbol;Acc:15714]                                                      |
| 5360 | ENSG00000052749 | 1095.565364 | -0.44183883  | 0.115024871 | 0.000427389 | RRP12        | ribosomal RNA processing 12 homolog ( <i>S. cerevisiae</i> ) [Source:HGNC Symbol;Acc:29100]                                          |
| 5361 | ENSG00000186222 | 200.3154888 | 0.864893735  | 0.225181685 | 0.000427963 | BLOC1S4      | biogenesis of lysosomal organelles complex-1, subunit 4, cappuccino [Source:HGNC Symbol;Acc:24206]                                   |
| 5362 | ENSG00000133101 | 27.62725662 | -1.834602325 | 0.477808888 | 0.000430072 | CCNA1        | cyclin A1 [Source:HGNC Symbol;Acc:1577]                                                                                              |
| 5363 | ENSG00000198252 | 670.3985782 | 0.527024312  | 0.137261196 | 0.000430072 | STYX         | serine/threonine/tyrosine interacting protein [Source:HGNC Symbol;Acc:11447]                                                         |
| 5364 | ENSG00000128159 | 1794.865725 | 0.4199265    | 0.109406428 | 0.000432358 | TUBGCP6      | tubulin, gamma complex associated protein 6 [Source:HGNC Symbol;Acc:18127]                                                           |
| 5365 | ENSG00000168214 | 4685.752926 | -0.22708856  | 0.059185527 | 0.000434627 | RBPJ         | recombination signal binding protein for immunoglobulin kappa J region [Source:HGNC Symbol;Acc:5724]                                 |
| 5366 | ENSG00000137288 | 281.9148455 | -0.738574079 | 0.192506291 | 0.000435024 | UQC22        | ubiquinol-cytochrome c reductase complex assembly factor 2 [Source:HGNC Symbol;Acc:21237]                                            |
| 5367 | ENSG00000257103 | 1845.431681 | 0.386539944  | 0.100771437 | 0.000436388 | LSM14A       | LSM14A, SCD6 homolog A ( <i>S. cerevisiae</i> ) [Source:HGNC Symbol;Acc:24489]                                                       |
| 5368 | ENSG00000197324 | 8902.177661 | 0.306851983  | 0.080014495 | 0.000437824 | LRP10        | low density lipoprotein receptor-related protein 10 [Source:HGNC Symbol;Acc:14553]                                                   |
| 5369 | ENSG00000068079 | 703.0197249 | -0.501366336 | 0.130759241 | 0.000438963 | IFI35        | interferon-induced protein 35 [Source:HGNC Symbol;Acc:5399]                                                                          |
| 5370 | ENSG00000183813 | 197.0418792 | 0.940594657  | 0.245336706 | 0.000439556 | CCR4         | chemokine (C-C motif) receptor 4 [Source:HGNC Symbol;Acc:1605]                                                                       |

|      |                 |             |              |             |             |            |                                                                                                           |
|------|-----------------|-------------|--------------|-------------|-------------|------------|-----------------------------------------------------------------------------------------------------------|
| 5371 | ENSG00000160075 | 2610.237613 | 0.282844288  | 0.073776415 | 0.000439634 | SSU72      | SSU72 RNA polymerase II CTD phosphatase homolog ( <i>S. cerevisiae</i> ) [Source:HGNC Symbol;Acc:25016]   |
| 5372 | ENSG00000244270 | 18.56213564 | 2.107324132  | 0.549685901 | 0.000439759 | RPL32P29   | ribosomal protein L32 pseudogene 29 [Source:HGNC Symbol;Acc:35771]                                        |
| 5373 | ENSG00000108773 | 394.8446111 | 0.65782239   | 0.17160102  | 0.000440119 | KAT2A      | K(lysine) acetyltransferase 2A [Source:HGNC Symbol;Acc:4201]                                              |
| 5374 | ENSG00000213622 | 62.35305081 | -1.406823113 | 0.367021566 | 0.000440683 | AL163952.1 |                                                                                                           |
| 5375 | ENSG00000184779 | 1703.214645 | 0.9589929    | 0.250198572 | 0.000440876 | RPS17      | ribosomal protein S17 [Source:HGNC Symbol;Acc:10397]                                                      |
| 5376 | ENSG00000104936 | 254.0080864 | -0.835716945 | 0.218043888 | 0.000441035 | DMPK       | dystrophia myotonica-protein kinase [Source:HGNC Symbol;Acc:2933]                                         |
| 5377 | ENSG00000169905 | 1807.245606 | -0.343547844 | 0.089661031 | 0.000443043 | TOR1AIP2   | torsin A interacting protein 2 [Source:HGNC Symbol;Acc:24055]                                             |
| 5378 | ENSG00000234231 | 443.7378073 | 0.592809586  | 0.154720265 | 0.000443207 | AC093616.4 |                                                                                                           |
| 5379 | ENSG00000164366 | 504.5001808 | 0.58155807   | 0.151799789 | 0.000443858 | CCDC127    | coiled-coil domain containing 127 [Source:HGNC Symbol;Acc:30520]                                          |
| 5380 | ENSG00000185085 | 316.0610206 | 0.768286313  | 0.200545843 | 0.000443974 | INTS5      | integrator complex subunit 5 [Source:HGNC Symbol;Acc:29352]                                               |
| 5381 | ENSG00000171055 | 612.5354668 | -0.517951859 | 0.135218214 | 0.000444771 | FEZ2       | fasciculation and elongation protein zeta 2 (zygin II) [Source:HGNC Symbol;Acc:3660]                      |
| 5382 | ENSG00000169752 | 173.9414197 | -1.203121367 | 0.314125972 | 0.000445464 | NRG4       | neuregulin 4 [Source:HGNC Symbol;Acc:29862]                                                               |
| 5383 | ENSG00000230453 | 11.59217556 | -2.142010032 | 0.559486331 | 0.000448159 | ANKRD18B   | ankyrin repeat domain 18B [Source:HGNC Symbol;Acc:23644]                                                  |
| 5384 | ENSG00000121716 | 4291.877731 | -0.248031791 | 0.064795183 | 0.000449159 | PILRB      | paired immunoglobulin-like type 2 receptor beta [Source:HGNC Symbol;Acc:18297]                            |
| 5385 | ENSG00000187796 | 329.5292461 | -0.742046064 | 0.19393484  | 0.000452133 | CARD9      | caspase recruitment domain family, member 9 [Source:HGNC Symbol;Acc:16391]                                |
| 5386 | ENSG00000120942 | 273.0903844 | 0.731573114  | 0.191278807 | 0.000454969 | UBIAD1     | UbiA prenyltransferase domain containing 1 [Source:HGNC Symbol;Acc:30791]                                 |
| 5387 | ENSG00000124767 | 630.5141023 | 0.496006179  | 0.129687264 | 0.000454969 | GLO1       | glyoxalase I [Source:HGNC Symbol;Acc:4323]                                                                |
| 5388 | ENSG0000035681  | 946.3522536 | 0.474461559  | 0.12409113  | 0.000456994 | NSMAF      | neutral sphingomyelinase (N-SMase) activation associated factor [Source:HGNC Symbol;Acc:8017]             |
| 5389 | ENSG00000248333 | 1658.295687 | 0.447591475  | 0.117082731 | 0.000458075 | CDK11B     | cyclin-dependent kinase 11B [Source:HGNC Symbol;Acc:1729]                                                 |
| 5390 | ENSG00000196526 | 332.2872494 | -0.838480263 | 0.219338836 | 0.00045818  | AFAP1      | actin filament associated protein 1 [Source:HGNC Symbol;Acc:24017]                                        |
| 5391 | ENSG00000242950 | 354.0550177 | -0.657893813 | 0.172102075 | 0.00045822  | ERVW-1     | endogenous retrovirus group W, member 1 [Source:HGNC Symbol;Acc:13525]                                    |
| 5392 | ENSG00000157450 | 1408.448253 | -0.434463395 | 0.113675077 | 0.000459474 | RNF111     | ring finger protein 111 [Source:HGNC Symbol;Acc:17384]                                                    |
| 5393 | ENSG00000171840 | 674.7347517 | -0.522675141 | 0.136760709 | 0.000459675 | NINJ2      | ninjurin 2 [Source:HGNC Symbol;Acc:7825]                                                                  |
| 5394 | ENSG00000131845 | 282.328034  | 0.715505121  | 0.187228027 | 0.000460059 | ZNF304     | zinc finger protein 304 [Source:HGNC Symbol;Acc:13505]                                                    |
| 5395 | ENSG00000225190 | 2231.286095 | -0.420098132 | 0.1099413   | 0.000460828 | PLEKHM1    | pleckstrin homology domain containing, family M (with RUN domain) member 1 [Source:HGNC Symbol;Acc:29017] |
| 5396 | ENSG00000185359 | 2254.714164 | -0.294025861 | 0.076965576 | 0.000462404 | HGS        | hepatocyte growth factor-regulated tyrosine kinase substrate [Source:HGNC Symbol;Acc:4897]                |
| 5397 | ENSG00000153936 | 420.238425  | 0.625809903  | 0.163871361 | 0.000464791 | HS2ST1     | heparan sulfate 2-O-sulfotransferase 1 [Source:HGNC Symbol;Acc:5193]                                      |
| 5398 | ENSG00000171700 | 2391.394829 | -0.431923614 | 0.113135716 | 0.000466899 | RGS19      | regulator of G-protein signaling 19 [Source:HGNC Symbol;Acc:13735]                                        |

|      |                 |             |              |             |             |           |                                                                                                         |
|------|-----------------|-------------|--------------|-------------|-------------|-----------|---------------------------------------------------------------------------------------------------------|
| 5399 | ENSG00000007129 | 417.9393153 | 0.619947708  | 0.162387911 | 0.00046691  | CEACAM21  | carcinoembryonic antigen-related cell adhesion molecule 21 [Source:HGNC Symbol;Acc:28834]               |
| 5400 | ENSG00000110066 | 1895.215282 | -0.333569086 | 0.087441956 | 0.00047243  | SUV420H1  | suppressor of variegation 4-20 homolog 1 (Drosophila) [Source:HGNC Symbol;Acc:24283]                    |
| 5401 | ENSG00000256235 | 24.90621022 | 1.899628396  | 0.498052837 | 0.000473483 | SMIM3     | small integral membrane protein 3 [Source:HGNC Symbol;Acc:30248]                                        |
| 5402 | ENSG00000166275 | 380.6055468 | 0.642964354  | 0.168575312 | 0.000473483 | C10orf32  | chromosome 10 open reading frame 32 [Source:HGNC Symbol;Acc:23516]                                      |
| 5403 | ENSG00000175538 | 2058.303832 | -0.311461297 | 0.08166309  | 0.000473642 | KCNE3     | potassium voltage-gated channel, Isk-related family, member 3 [Source:HGNC Symbol;Acc:6243]             |
| 5404 | ENSG00000136240 | 1051.296223 | -0.423460148 | 0.111051671 | 0.000475086 | KDELR2    | KDEL (Lys-Asp-Glu-Leu) endoplasmic reticulum protein retention receptor 2 [Source:HGNC Symbol;Acc:6305] |
| 5405 | ENSG00000267241 | 17.20634704 | -2.052798911 | 0.538428505 | 0.000476165 | CYP4F10P  | cytochrome P450, family 4, subfamily F, polypeptide 10, pseudogene [Source:HGNC Symbol;Acc:39943]       |
| 5406 | ENSG00000145022 | 748.9093176 | 0.508707253  | 0.13344129  | 0.000476766 | TCTA      | T-cell leukemia translocation altered [Source:HGNC Symbol;Acc:11692]                                    |
| 5407 | ENSG00000100350 | 113.1198629 | -1.160082877 | 0.304394388 | 0.000478804 | FOXRED2   | FAD-dependent oxidoreductase domain containing 2 [Source:HGNC Symbol;Acc:26264]                         |
| 5408 | ENSG00000262676 | 380.6784524 | -0.639798396 | 0.167900376 | 0.000479751 | SLC37A4   | solute carrier family 37 (glucose-6-phosphate transporter), member 4 [Source:HGNC Symbol;Acc:4061]      |
| 5409 | ENSG00000144848 | 2482.527767 | -0.283277472 | 0.074342741 | 0.000479969 | ATG3      | autophagy related 3 [Source:HGNC Symbol;Acc:20962]                                                      |
| 5410 | ENSG00000101452 | 307.4797478 | -0.777549281 | 0.204142781 | 0.000482947 | DHX35     | DEAH (Asp-Glu-Ala-His) box polypeptide 35 [Source:HGNC Symbol;Acc:15861]                                |
| 5411 | ENSG00000095585 | 256.3475556 | 2.050878922  | 0.538658814 | 0.000485736 | BLNK      | B-cell linker [Source:HGNC Symbol;Acc:14211]                                                            |
| 5412 | ENSG00000175573 | 810.2609191 | 0.437913557  | 0.11502103  | 0.000485907 | C11orf68  | chromosome 11 open reading frame 68 [Source:HGNC Symbol;Acc:28801]                                      |
| 5413 | ENSG00000114739 | 120.8455065 | 1.079969116  | 0.283666218 | 0.000485945 | ACVR2B    | activin A receptor, type IIB [Source:HGNC Symbol;Acc:174]                                               |
| 5414 | ENSG00000149636 | 524.8215867 | -0.566760981 | 0.149022393 | 0.000493749 | DSN1      | DSN1, MIS12 kinetochore complex component [Source:HGNC Symbol;Acc:16165]                                |
| 5415 | ENSG00000152463 | 26.53012874 | -1.890049544 | 0.497185612 | 0.000497051 | OLAH      | oleoyl-ACP hydrolase [Source:HGNC Symbol;Acc:25625]                                                     |
| 5416 | ENSG00000179152 | 482.4201546 | -0.575021775 | 0.151322091 | 0.0005      | TCAIM     | T cell activation inhibitor, mitochondrial [Source:HGNC Symbol;Acc:25241]                               |
| 5417 | ENSG00000139433 | 1440.570831 | -0.357007508 | 0.09396515  | 0.00050117  | GLTP      | glycolipid transfer protein [Source:HGNC Symbol;Acc:24867]                                              |
| 5418 | ENSG00000186314 | 36.17332771 | -1.711575885 | 0.450499795 | 0.000501236 | PRELID2   | PRELI domain containing 2 [Source:HGNC Symbol;Acc:28306]                                                |
| 5419 | ENSG00000174428 | 852.4755157 | -0.441793861 | 0.116401155 | 0.000508898 | GTF2IRD2B | GTF2I repeat domain containing 2B [Source:HGNC Symbol;Acc:33125]                                        |
| 5420 | ENSG00000173950 | 176.4781572 | -0.970454479 | 0.255690325 | 0.000508898 | XYLT1     | xyloside xylosyltransferase 1 [Source:HGNC Symbol;Acc:26639]                                            |
| 5421 | ENSG00000115756 | 1327.485614 | 0.398628847  | 0.105032803 | 0.000509111 | HPCAL1    | hippocalcin-like 1 [Source:HGNC Symbol;Acc:5145]                                                        |
| 5422 | ENSG00000102882 | 2166.03247  | -0.312169571 | 0.082260496 | 0.000509816 | MAPK3     | mitogen-activated protein kinase 3 [Source:HGNC Symbol;Acc:6877]                                        |
| 5423 | ENSG00000131355 | 2931.304308 | 0.282128855  | 0.074359345 | 0.000511291 | EMR3      | egf-like module containing, mucin-like, hormone receptor-like 3 [Source:HGNC Symbol;Acc:23647]          |
| 5424 | ENSG00000225422 | 150.9588503 | -1.027409134 | 0.270825538 | 0.000512207 | RBMS1P1   | RNA binding motif, single stranded interacting protein 1 pseudogene 1 [Source:HGNC Symbol;Acc:9908]     |
| 5425 | ENSG00000236353 | 896.5538721 | -0.466207166 | 0.122893344 | 0.000512207 | PBX2      | pre-B-cell leukemia homeobox 2 [Source:HGNC Symbol;Acc:8633]                                            |
| 5426 | ENSG00000188487 | 35.29634992 | -1.76851267  | 0.466241417 | 0.000513074 | INSC      | inscuteable homolog (Drosophila) [Source:HGNC Symbol;Acc:33116]                                         |



|      |                 |             |              |             |             |           |                                                                                                                   |
|------|-----------------|-------------|--------------|-------------|-------------|-----------|-------------------------------------------------------------------------------------------------------------------|
| 5427 | ENSG00000145358 | 13.23334083 | 2.11820832   | 0.558557074 | 0.000514718 | DDIT4L    | DNA-damage-inducible transcript 4-like [Source:HGNC Symbol;Acc:30555]                                             |
| 5428 | ENSG00000066084 | 1715.348636 | 0.351832486  | 0.092793495 | 0.000516123 | DIP2B     | DIP2 disco-interacting protein 2 homolog B (Drosophila) [Source:HGNC Symbol;Acc:29284]                            |
| 5429 | ENSG00000222047 | 51.00286287 | -1.466133669 | 0.386778711 | 0.000517979 | C10orf55  | chromosome 10 open reading frame 55 [Source:HGNC Symbol;Acc:31008]                                                |
| 5430 | ENSG00000225987 | 246.5401695 | -0.763673927 | 0.201482606 | 0.000518623 | PBX2      | pre-B-cell leukemia homeobox 2 [Source:HGNC Symbol;Acc:8633]                                                      |
| 5431 | ENSG00000128928 | 945.2268265 | -0.447443636 | 0.118072798 | 0.000520022 | IVD       | isovaleryl-CoA dehydrogenase [Source:HGNC Symbol;Acc:6186]                                                        |
| 5432 | ENSG00000196998 | 1340.472355 | 0.371180267  | 0.097960404 | 0.000520826 | WDR45     | WD repeat domain 45 [Source:HGNC Symbol;Acc:28912]                                                                |
| 5433 | ENSG00000148848 | 43.39791141 | 1.686840371  | 0.445184415 | 0.000520826 | ADAM12    | ADAM metalloproteinase domain 12 [Source:HGNC Symbol;Acc:190]                                                     |
| 5434 | ENSG00000135749 | 316.9614862 | 0.780458653  | 0.206026836 | 0.000522707 | PCNXL2    | pecanex-like 2 (Drosophila) [Source:HGNC Symbol;Acc:8736]                                                         |
| 5435 | ENSG00000133302 | 393.1476097 | -0.684902603 | 0.180818434 | 0.000523327 | ANKRD32   | ankyrin repeat domain 32 [Source:HGNC Symbol;Acc:25408]                                                           |
| 5436 | ENSG00000155465 | 1200.154496 | 0.455886478  | 0.12035797  | 0.000523327 | SLC7A7    | solute carrier family 7 (amino acid transporter light chain, y+L system), member 7 [Source:HGNC Symbol;Acc:11065] |
| 5437 | ENSG00000178974 | 597.1049789 | 0.507056031  | 0.13387268  | 0.000523559 | FBXO34    | F-box protein 34 [Source:HGNC Symbol;Acc:20201]                                                                   |
| 5438 | ENSG00000130202 | 169.0679584 | 0.967442177  | 0.255431817 | 0.000523719 | PVRL2     | poliovirus receptor-related 2 (herpesvirus entry mediator B) [Source:HGNC Symbol;Acc:9707]                        |
| 5439 | ENSG00000100068 | 335.6244944 | -0.656160322 | 0.173299944 | 0.000526172 | LRP5L     | low density lipoprotein receptor-related protein 5-like [Source:HGNC Symbol;Acc:25323]                            |
| 5440 | ENSG00000169692 | 539.9493845 | -0.592459666 | 0.156516812 | 0.000528178 | AGPAT2    | 1-acylglycerol-3-phosphate O-acyltransferase 2 [Source:HGNC Symbol;Acc:325]                                       |
| 5441 | ENSG00000112033 | 651.6394921 | 0.544233782  | 0.143794169 | 0.000529073 | PPARD     | peroxisome proliferator-activated receptor delta [Source:HGNC Symbol;Acc:9235]                                    |
| 5442 | ENSG00000179195 | 998.5765687 | 0.519079016  | 0.137151545 | 0.000529188 | ZNF664    | zinc finger protein 664 [Source:HGNC Symbol;Acc:25406]                                                            |
| 5443 | ENSG00000198087 | 431.8408157 | 0.588741635  | 0.155564412 | 0.00052943  | CD2AP     | CD2-associated protein [Source:HGNC Symbol;Acc:14258]                                                             |
| 5444 | ENSG00000138443 | 438.9186556 | 0.592028695  | 0.156442463 | 0.000529822 | ABI2      | abl-interactor 2 [Source:HGNC Symbol;Acc:24011]                                                                   |
| 5445 | ENSG00000132382 | 422.0341058 | 0.647856314  | 0.171209891 | 0.000530435 | MYBBP1A   | MYB binding protein (P160) 1a [Source:HGNC Symbol;Acc:7546]                                                       |
| 5446 | ENSG00000168795 | 328.8901694 | 0.676313975  | 0.17878217  | 0.000532677 | ZBTB5     | zinc finger and BTB domain containing 5 [Source:HGNC Symbol;Acc:23836]                                            |
| 5447 | ENSG00000162004 | 57.87267873 | 1.638218476  | 0.433197078 | 0.000535155 | CCDC78    | coiled-coil domain containing 78 [Source:HGNC Symbol;Acc:14153]                                                   |
| 5448 | ENSG00000137076 | 15503.47174 | -0.229485243 | 0.060698795 | 0.00053715  | TLN1      | talin 1 [Source:HGNC Symbol;Acc:11845]                                                                            |
| 5449 | ENSG00000126746 | 2175.783633 | -0.295989509 | 0.078292736 | 0.000537424 | ZNF384    | zinc finger protein 384 [Source:HGNC Symbol;Acc:11955]                                                            |
| 5450 | ENSG00000165905 | 64.18314247 | 1.497360152  | 0.396193719 | 0.000539889 | GYLTL1B   | glycosyltransferase-like 1B [Source:HGNC Symbol;Acc:16522]                                                        |
| 5451 | ENSG00000198039 | 251.7811315 | -0.768194143 | 0.203263967 | 0.000539943 | ZNF273    | zinc finger protein 273 [Source:HGNC Symbol;Acc:13067]                                                            |
| 5452 | ENSG00000139651 | 970.3559015 | 0.541230588  | 0.143286938 | 0.00054429  | ZNF740    | zinc finger protein 740 [Source:HGNC Symbol;Acc:27465]                                                            |
| 5453 | ENSG00000227051 | 158.6524689 | -1.09822306  | 0.290785601 | 0.000545295 | C14orf132 | chromosome 14 open reading frame 132 [Source:HGNC Symbol;Acc:20346]                                               |
| 5454 | ENSG00000133275 | 1638.684928 | 1.111793559  | 0.294482764 | 0.00054812  | CSNK1G2   | casein kinase 1, gamma 2 [Source:HGNC Symbol;Acc:2455]                                                            |

|      |                 |             |              |             |             |                |                                                                                                                     |
|------|-----------------|-------------|--------------|-------------|-------------|----------------|---------------------------------------------------------------------------------------------------------------------|
| 5455 | ENSG00000237651 | 50.05650176 | 1.549401023  | 0.410457603 | 0.000549335 | C2orf74        | chromosome 2 open reading frame 74 [Source:HGNC Symbol;Acc:34439]                                                   |
| 5456 | ENSG00000250021 | 294.1281574 | -0.687019774 | 0.182005949 | 0.000549448 | C15orf38-AP3S2 | C15orf38-AP3S2 readthrough [Source:HGNC Symbol;Acc:38824]                                                           |
| 5457 | ENSG00000256771 | 190.1851281 | 0.96856003   | 0.256594568 | 0.000549448 | ZNF253         | zinc finger protein 253 [Source:HGNC Symbol;Acc:13497]                                                              |
| 5458 | ENSG00000144406 | 394.5398148 | -0.606467707 | 0.160775747 | 0.000554964 | UNC80          | unc-80 homolog (C. elegans) [Source:HGNC Symbol;Acc:26582]                                                          |
| 5459 | ENSG00000152944 | 386.5011909 | -0.629070392 | 0.166776408 | 0.000555298 | MED21          | mediator complex subunit 21 [Source:HGNC Symbol;Acc:11473]                                                          |
| 5460 | ENSG00000140374 | 962.8128114 | -0.44122251  | 0.117001122 | 0.000557074 | ETFA           | electron-transfer-flavoprotein, alpha polypeptide [Source:HGNC Symbol;Acc:3481]                                     |
| 5461 | ENSG00000143363 | 661.9104193 | 0.517798803  | 0.137313471 | 0.000557354 | PRUNE          | prune exopolyphosphatase [Source:HGNC Symbol;Acc:13420]                                                             |
| 5462 | ENSG00000197256 | 145.0078076 | -0.960331004 | 0.254707048 | 0.00055857  | KANK2          | KN motif and ankyrin repeat domains 2 [Source:HGNC Symbol;Acc:29300]                                                |
| 5463 | ENSG00000162398 | 17.94558846 | 2.013828512  | 0.534148408 | 0.000558846 | C1orf177       | chromosome 1 open reading frame 177 [Source:HGNC Symbol;Acc:26854]                                                  |
| 5464 | ENSG00000187866 | 569.458925  | 0.531206685  | 0.140900255 | 0.000558915 | FAM122A        | family with sequence similarity 122A [Source:HGNC Symbol;Acc:23490]                                                 |
| 5465 | ENSG0000055130  | 951.3160819 | 0.422157515  | 0.111995748 | 0.000560345 | CUL1           | cullin 1 [Source:HGNC Symbol;Acc:2551]                                                                              |
| 5466 | ENSG00000225828 | 549.1125496 | -0.586233927 | 0.155537203 | 0.000560951 | FAM229A        | family with sequence similarity 229, member A [Source:HGNC Symbol;Acc:44652]                                        |
| 5467 | ENSG00000188878 | 150.262733  | 1.023300206  | 0.271518453 | 0.000561491 | FBF1           | Fas (TNFRSF6) binding factor 1 [Source:HGNC Symbol;Acc:24674]                                                       |
| 5468 | ENSG00000105655 | 169.3626543 | 0.927190232  | 0.246021329 | 0.000561537 | ISYNA1         | inositol-3-phosphate synthase 1 [Source:HGNC Symbol;Acc:29821]                                                      |
| 5469 | ENSG00000158161 | 913.6076713 | -0.484660612 | 0.128617735 | 0.000562591 | EYA3           | eyes absent homolog 3 (Drosophila) [Source:HGNC Symbol;Acc:3521]                                                    |
| 5470 | ENSG00000169704 | 21.03360906 | 1.951155618  | 0.517810123 | 0.000562791 | GP9            | glycoprotein IX (platelet) [Source:HGNC Symbol;Acc:4444]                                                            |
| 5471 | ENSG00000149970 | 40.73032625 | 1.706889966  | 0.453034747 | 0.000563615 | CNKSR2         | connector enhancer of kinase suppressor of Ras 2 [Source:HGNC Symbol;Acc:19701]                                     |
| 5472 | ENSG00000175414 | 353.7168883 | 0.786512     | 0.20875766  | 0.000563729 | ARL10          | ADP-ribosylation factor-like 10 [Source:HGNC Symbol;Acc:22042]                                                      |
| 5473 | ENSG0000049323  | 172.6408693 | -1.008860689 | 0.267821931 | 0.000565153 | LTFP1          | latent transforming growth factor beta binding protein 1 [Source:HGNC Symbol;Acc:6714]                              |
| 5474 | ENSG00000110237 | 728.1941676 | -0.479829542 | 0.127383169 | 0.000565248 | ARHGEF17       | Rho guanine nucleotide exchange factor (GEF) 17 [Source:HGNC Symbol;Acc:21726]                                      |
| 5475 | ENSG00000161642 | 368.3924065 | 0.674795097  | 0.179160349 | 0.000566027 | ZNF385A        | zinc finger protein 385A [Source:HGNC Symbol;Acc:17521]                                                             |
| 5476 | ENSG00000171703 | 158.8289359 | 0.956996328  | 0.254173187 | 0.000568867 | TCEA2          | transcription elongation factor A (SII), 2 [Source:HGNC Symbol;Acc:11614]                                           |
| 5477 | ENSG00000146416 | 309.4845574 | -0.701020079 | 0.186283795 | 0.000573222 | AIG1           | androgen-induced 1 [Source:HGNC Symbol;Acc:21607]                                                                   |
| 5478 | ENSG0000003400  | 2694.889296 | -0.280552281 | 0.074559057 | 0.000573952 | CASP10         | caspace 10, apoptosis-related cysteine peptidase [Source:HGNC Symbol;Acc:1500]                                      |
| 5479 | ENSG00000151694 | 1391.216352 | 0.354421985  | 0.094211455 | 0.000575768 | ADAM17         | ADAM metallopeptidase domain 17 [Source:HGNC Symbol;Acc:195]                                                        |
| 5480 | ENSG00000104518 | 1278.684743 | 0.458428634  | 0.121870548 | 0.000576541 | GSDMD          | gasdermin D [Source:HGNC Symbol;Acc:25697]                                                                          |
| 5481 | ENSG00000143412 | 848.1137176 | -0.441371789 | 0.117350339 | 0.00057749  | ANXA9          | annexin A9 [Source:HGNC Symbol;Acc:547]                                                                             |
| 5482 | ENSG00000140093 | 79.05744764 | -1.229300222 | 0.326967576 | 0.000580731 | SERPINA10      | serpin peptidase inhibitor, clade A (alpha-1 antiproteinase, antitrypsin), member 10 [Source:HGNC Symbol;Acc:15996] |

|      |                 |             |              |             |             |              |                                                                                                   |
|------|-----------------|-------------|--------------|-------------|-------------|--------------|---------------------------------------------------------------------------------------------------|
| 5483 | ENSG00000169599 | 420.3276938 | -0.568119958 | 0.151172237 | 0.000584357 | NFU1         | NFU1 iron-sulfur cluster scaffold homolog ( <i>S. cerevisiae</i> ) [Source:HGNC Symbol;Acc:16287] |
| 5484 | ENSG00000148450 | 736.6401105 | -0.488495002 | 0.130002965 | 0.000585487 | MSRB2        | methionine sulfoxide reductase B2 [Source:HGNC Symbol;Acc:17061]                                  |
| 5485 | ENSG00000168264 | 5241.024418 | -0.243908382 | 0.064917622 | 0.000586246 | IRF2BP2      | interferon regulatory factor 2 binding protein 2 [Source:HGNC Symbol;Acc:21729]                   |
| 5486 | ENSG00000263965 | 18.36464448 | -1.98001699  | 0.527026061 | 0.000586692 | HIST2H2AB    | histone cluster 2, H2ab [Source:HGNC Symbol;Acc:20508]                                            |
| 5487 | ENSG00000196659 | 74.58562683 | 1.312514585  | 0.349425904 | 0.000588367 | TTC30B       | tetratricopeptide repeat domain 30B [Source:HGNC Symbol;Acc:26425]                                |
| 5488 | ENSG00000243646 | 2621.813714 | -0.270564371 | 0.072052493 | 0.000590854 | IL10RB       | interleukin 10 receptor, beta [Source:HGNC Symbol;Acc:5965]                                       |
| 5489 | ENSG00000182158 | 958.8914632 | -0.411594517 | 0.109653052 | 0.000594279 | CREB3L2      | cAMP responsive element binding protein 3-like 2 [Source:HGNC Symbol;Acc:23720]                   |
| 5490 | ENSG00000065413 | 1861.273555 | 0.378987144  | 0.100974089 | 0.000594874 | ANKRD44      | ankyrin repeat domain 44 [Source:HGNC Symbol;Acc:25259]                                           |
| 5491 | ENSG00000183092 | 27.06035161 | -1.814791069 | 0.483552616 | 0.000595415 | BEGAIN       | brain-enriched guanylate kinase-associated [Source:HGNC Symbol;Acc:24163]                         |
| 5492 | ENSG00000148834 | 1118.122975 | -0.369268381 | 0.098402703 | 0.000596289 | GSTO1        | glutathione S-transferase omega 1 [Source:HGNC Symbol;Acc:13312]                                  |
| 5493 | ENSG00000235107 | 161.0420871 | 0.956107757  | 0.25487398  | 0.00059924  | RING1        | ring finger protein 1 [Source:HGNC Symbol;Acc:10018]                                              |
| 5494 | ENSG00000206287 | 161.0420277 | 0.956105574  | 0.254873422 | 0.00059924  | RING1        | ring finger protein 1 [Source:HGNC Symbol;Acc:10018]                                              |
| 5495 | ENSG00000177602 | 48.13109251 | -1.560454464 | 0.41607537  | 0.000601244 | GSG2         | germ cell associated 2 (haspin) [Source:HGNC Symbol;Acc:19682]                                    |
| 5496 | ENSG00000071994 | 884.4332684 | 0.422591609  | 0.11268651  | 0.000601759 | PDCD2        | programmed cell death 2 [Source:HGNC Symbol;Acc:8762]                                             |
| 5497 | ENSG00000115207 | 1417.336066 | -0.400782476 | 0.106874925 | 0.000601982 | GTF3C2       | general transcription factor IIIC, polypeptide 2, beta 110kDa [Source:HGNC Symbol;Acc:4665]       |
| 5498 | ENSG00000244720 | 45.29426786 | 1.561941344  | 0.416694664 | 0.000605704 | RP11-402J7.2 |                                                                                                   |
| 5499 | ENSG00000164190 | 3210.369448 | -0.264253215 | 0.070498038 | 0.000605704 | NIPBL        | Nipped-B homolog ( <i>Drosophila</i> ) [Source:HGNC Symbol;Acc:28862]                             |
| 5500 | ENSG00000172954 | 617.9555471 | -0.488852237 | 0.130419961 | 0.000605716 | LCLAT1       | lysocardiolipin acyltransferase 1 [Source:HGNC Symbol;Acc:26756]                                  |
| 5501 | ENSG00000235941 | 3198.028295 | -0.756142538 | 0.201730491 | 0.000605716 | HSPA1A       | heat shock 70kDa protein 1A [Source:HGNC Symbol;Acc:5232]                                         |
| 5502 | ENSG00000114026 | 754.138549  | -0.458266189 | 0.122284535 | 0.000607397 | OGG1         | 8-oxoguanine DNA glycosylase [Source:HGNC Symbol;Acc:8125]                                        |
| 5503 | ENSG00000101928 | 208.9167639 | -0.822557427 | 0.219506889 | 0.000607876 | MOSPD1       | motile sperm domain containing 1 [Source:HGNC Symbol;Acc:25235]                                   |
| 5504 | ENSG00000122678 | 710.9987969 | 0.482138034  | 0.128668778 | 0.00060818  | POLM         | polymerase (DNA directed), mu [Source:HGNC Symbol;Acc:9185]                                       |
| 5505 | ENSG00000171291 | 465.8772701 | 0.551950542  | 0.147375467 | 0.000612753 | ZNF439       | zinc finger protein 439 [Source:HGNC Symbol;Acc:20873]                                            |
| 5506 | ENSG00000151748 | 258.1969291 | 0.811788665  | 0.216773944 | 0.000613464 | SAV1         | salvador homolog 1 ( <i>Drosophila</i> ) [Source:HGNC Symbol;Acc:17795]                           |
| 5507 | ENSG00000072786 | 9333.279702 | -0.196719152 | 0.052537467 | 0.000614584 | STK10        | serine/threonine kinase 10 [Source:HGNC Symbol;Acc:11388]                                         |
| 5508 | ENSG00000147679 | 317.110983  | 0.743681642  | 0.198654838 | 0.000616366 | UTP23        | UTP23, small subunit (SSU) processome component, homolog (yeast) [Source:HGNC Symbol;Acc:28224]   |
| 5509 | ENSG00000101966 | 1345.618261 | 0.408371137  | 0.109099687 | 0.000617447 | XIAP         | X-linked inhibitor of apoptosis [Source:HGNC Symbol;Acc:592]                                      |
| 5510 | ENSG00000102908 | 3222.192188 | 0.282275173  | 0.075414263 | 0.000617523 | NFAT5        | nuclear factor of activated T-cells 5, tonicity-responsive [Source:HGNC Symbol;Acc:7774]          |

|      |                 |             |              |             |             |           |                                                                                                         |
|------|-----------------|-------------|--------------|-------------|-------------|-----------|---------------------------------------------------------------------------------------------------------|
| 5511 | ENSG00000133055 | 134.6509998 | 1.013308962  | 0.270722588 | 0.000617523 | MYBPH     | myosin binding protein H [Source:HGNC Symbol;Acc:7552]                                                  |
| 5512 | ENSG00000142252 | 498.8555987 | -0.572838138 | 0.153047572 | 0.000617663 | GEMIN7    | gem (nuclear organelle) associated protein 7 [Source:HGNC Symbol;Acc:20045]                             |
| 5513 | ENSG00000136897 | 310.1329812 | 0.693149564  | 0.185226538 | 0.000619285 | MRPL50    | mitochondrial ribosomal protein L50 [Source:HGNC Symbol;Acc:16654]                                      |
| 5514 | ENSG00000224305 | 20.8140414  | 1.976169871  | 0.528128061 | 0.000619884 | HLA-DQB2  | major histocompatibility complex, class II, DQ beta 2 [Source:HGNC Symbol;Acc:4945]                     |
| 5515 | ENSG00000230675 | 20.81404061 | 1.976169651  | 0.528128071 | 0.000619884 | HLA-DQB2  | major histocompatibility complex, class II, DQ beta 2 [Source:HGNC Symbol;Acc:4945]                     |
| 5516 | ENSG00000182218 | 176.5611479 | -0.886376546 | 0.236948536 | 0.000622343 | HHIPL1    | HHIP-like 1 [Source:HGNC Symbol;Acc:19710]                                                              |
| 5517 | ENSG00000233614 | 50.13763806 | 1.491489005  | 0.398716886 | 0.000622418 | DDX11L10  | DEAD/H (Asp-Glu-Ala-Asp/His) box helicase 11 like 10 [Source:HGNC Symbol;Acc:14125]                     |
| 5518 | ENSG00000186501 | 839.3257021 | 0.480345986  | 0.128427628 | 0.00062358  | TMEM222   | transmembrane protein 222 [Source:HGNC Symbol;Acc:25363]                                                |
| 5519 | ENSG00000005175 | 529.4694386 | 0.56831884   | 0.151955951 | 0.000623923 | RPAP3     | RNA polymerase II associated protein 3 [Source:HGNC Symbol;Acc:26151]                                   |
| 5520 | ENSG00000163904 | 1121.235706 | -0.480697565 | 0.128542322 | 0.000624849 | SEN2      | SUMO1/sentrin/SMT3 specific peptidase 2 [Source:HGNC Symbol;Acc:23116]                                  |
| 5521 | ENSG0000011405  | 768.1347771 | 0.462828636  | 0.123786692 | 0.000626439 | PIK3C2A   | phosphatidylinositol-4-phosphate 3-kinase, catalytic subunit type 2 alpha [Source:HGNC Symbol;Acc:8971] |
| 5522 | ENSG00000132953 | 663.1806308 | 0.534197485  | 0.142881531 | 0.000626766 | XPO4      | exportin 4 [Source:HGNC Symbol;Acc:17796]                                                               |
| 5523 | ENSG00000143751 | 422.0683447 | 0.601294903  | 0.160868372 | 0.000628993 | SDE2      | SDE2 telomere maintenance homolog ( <i>S. pombe</i> ) [Source:HGNC Symbol;Acc:26643]                    |
| 5524 | ENSG00000070831 | 11998.15308 | -0.191782316 | 0.051320835 | 0.000631078 | CDC42     | cell division cycle 42 [Source:HGNC Symbol;Acc:1736]                                                    |
| 5525 | ENSG00000108771 | 316.0997969 | 0.725222275  | 0.194077356 | 0.000631364 | DHX58     | DEXH (Asp-Glu-X-His) box polypeptide 58 [Source:HGNC Symbol;Acc:29517]                                  |
| 5526 | ENSG00000108424 | 6864.426436 | -0.270083544 | 0.072287092 | 0.000632523 | KPNB1     | karyopherin (importin) beta 1 [Source:HGNC Symbol;Acc:6400]                                             |
| 5527 | ENSG00000132005 | 302.3565316 | 0.717582383  | 0.192080718 | 0.000633477 | RFX1      | regulatory factor X, 1 (influences HLA class II expression) [Source:HGNC Symbol;Acc:9982]               |
| 5528 | ENSG00000196204 | 350.2094975 | 0.659250159  | 0.176472274 | 0.000633671 | RNF216P1  | ring finger protein 216 pseudogene 1 [Source:HGNC Symbol;Acc:33610]                                     |
| 5529 | ENSG00000176659 | 258.8935339 | -0.764280912 | 0.204616549 | 0.000634889 | C20orf197 | chromosome 20 open reading frame 197 [Source:HGNC Symbol;Acc:26601]                                     |
| 5530 | ENSG00000115590 | 1798.847912 | 0.337778097  | 0.090450016 | 0.000636717 | IL1R2     | interleukin 1 receptor, type II [Source:HGNC Symbol;Acc:5994]                                           |
| 5531 | ENSG00000179840 | 59.41978234 | -1.365819502 | 0.365765229 | 0.000637297 | C1orf200  | chromosome 1 open reading frame 200 [Source:HGNC Symbol;Acc:32346]                                      |
| 5532 | ENSG00000104870 | 6653.282955 | 0.218077421  | 0.058412664 | 0.000639082 | FCGRT     | Fc fragment of IgG, receptor, transporter, alpha [Source:HGNC Symbol;Acc:3621]                          |
| 5533 | ENSG00000160678 | 72.42114052 | 1.342052973  | 0.359482046 | 0.000639212 | S100A1    | S100 calcium binding protein A1 [Source:HGNC Symbol;Acc:10486]                                          |
| 5534 | ENSG00000183943 | 784.8698614 | 0.534776419  | 0.143283791 | 0.00064166  | PRKX      | protein kinase, X-linked [Source:HGNC Symbol;Acc:9441]                                                  |
| 5535 | ENSG00000113645 | 19.3725223  | 2.030524832  | 0.54408271  | 0.000642241 | WWC1      | WW and C2 domain containing 1 [Source:HGNC Symbol;Acc:29435]                                            |
| 5536 | ENSG00000185246 | 1061.290772 | 0.432645598  | 0.115943919 | 0.00064342  | PRPF39    | pre-mRNA processing factor 39 [Source:HGNC Symbol;Acc:20314]                                            |
| 5537 | ENSG00000228978 | 124.2421212 | -1.272139405 | 0.340979873 | 0.000644947 | TNF       | tumor necrosis factor [Source:HGNC Symbol;Acc:11892]                                                    |
| 5538 | ENSG00000101138 | 449.8172717 | 0.565310818  | 0.151524577 | 0.000644947 | CSTF1     | cleavage stimulation factor, 3' pre-RNA, subunit 1, 50kDa [Source:HGNC Symbol;Acc:2483]                 |

|      |                 |             |              |             |             |            |                                                                                                              |
|------|-----------------|-------------|--------------|-------------|-------------|------------|--------------------------------------------------------------------------------------------------------------|
| 5539 | ENSG00000149177 | 2669.79462  | -0.283421589 | 0.076009186 | 0.000650069 | PTPRJ      | protein tyrosine phosphatase, receptor type, J [Source:HGNC Symbol;Acc:9673]                                 |
| 5540 | ENSG00000198464 | 395.2647727 | 0.614297268  | 0.164751141 | 0.000650321 | ZNF480     | zinc finger protein 480 [Source:HGNC Symbol;Acc:23305]                                                       |
| 5541 | ENSG00000147408 | 2130.826647 | -0.306536558 | 0.082218744 | 0.000651062 | CSGALNACT1 | chondroitin sulfate N-acetylgalactosaminyltransferase 1 [Source:HGNC Symbol;Acc:24290]                       |
| 5542 | ENSG00000170113 | 235.9364131 | 0.827613609  | 0.222013666 | 0.000652354 | NIPA1      | non imprinted in Prader-Willi/Angelman syndrome 1 [Source:HGNC Symbol;Acc:17043]                             |
| 5543 | ENSG00000100979 | 74.24268034 | -1.226571797 | 0.329098808 | 0.000654043 | PLTP       | phospholipid transfer protein [Source:HGNC Symbol;Acc:9093]                                                  |
| 5544 | ENSG00000204389 | 11.05386707 | -2.110571239 | 0.566364698 | 0.000655325 | HSPA1A     | heat shock 70kDa protein 1A [Source:HGNC Symbol;Acc:5232]                                                    |
| 5545 | ENSG00000189409 | 22.1786549  | 1.941144933  | 0.520978192 | 0.000656666 | MMP23B     | matrix metalloproteinase 23B [Source:HGNC Symbol;Acc:7171]                                                   |
| 5546 | ENSG00000155368 | 1093.353545 | 0.412641253  | 0.110755704 | 0.00065726  | DBI        | diazepam binding inhibitor (GABA receptor modulator, acyl-CoA binding protein) [Source:HGNC Symbol;Acc:2690] |
| 5547 | ENSG00000235655 | 17054.69378 | 0.185100631  | 0.04968402  | 0.000657485 | H3F3AP4    | H3 histone, family 3A, pseudogene 4 [Source:HGNC Symbol;Acc:42980]                                           |
| 5548 | ENSG00000196664 | 167.0467232 | 1.040583706  | 0.279325605 | 0.000657924 | TLR7       | toll-like receptor 7 [Source:HGNC Symbol;Acc:15631]                                                          |
| 5549 | ENSG00000107864 | 281.6271128 | -0.759517786 | 0.203906299 | 0.000659126 | CPEB3      | cytoplasmic polyadenylation element binding protein 3 [Source:HGNC Symbol;Acc:21746]                         |
| 5550 | ENSG00000167676 | 466.0865422 | -0.656708528 | 0.176378096 | 0.000663035 | PLIN4      | perilipin 4 [Source:HGNC Symbol;Acc:29393]                                                                   |
| 5551 | ENSG00000185513 | 455.943455  | -0.58110329  | 0.156093113 | 0.000664232 | L3MBTL1    | l(3)mbt-like 1 (Drosophila) [Source:HGNC Symbol;Acc:15905]                                                   |
| 5552 | ENSG00000102931 | 814.1636067 | 0.435376986  | 0.116971275 | 0.000665994 | ARL2BP     | ADP-ribosylation factor-like 2 binding protein [Source:HGNC Symbol;Acc:17146]                                |
| 5553 | ENSG00000145495 | 6088.784015 | -0.230717351 | 0.062012774 | 0.000670117 | MARCH6     | membrane-associated ring finger (C3HC4) 6, E3 ubiquitin protein ligase [Source:HGNC Symbol;Acc:30550]        |
| 5554 | ENSG00000196646 | 363.7368055 | 0.628926275  | 0.169087569 | 0.000672524 | ZNF136     | zinc finger protein 136 [Source:HGNC Symbol;Acc:12920]                                                       |
| 5555 | ENSG00000126062 | 447.0280753 | 0.653676772  | 0.175970059 | 0.000685365 | TMEM115    | transmembrane protein 115 [Source:HGNC Symbol;Acc:30055]                                                     |
| 5556 | ENSG00000177105 | 6138.048787 | -0.231588969 | 0.062347758 | 0.000685873 | RHOG       | ras homolog family member G [Source:HGNC Symbol;Acc:672]                                                     |
| 5557 | ENSG00000259898 | 16.87277919 | -2.104990784 | 0.566870722 | 0.00068879  | CYP4F33P   | cytochrome P450, family 4, subfamily F, polypeptide 33, pseudogene [Source:HGNC Symbol;Acc:39952]            |
| 5558 | ENSG00000221926 | 204.8928866 | -0.825546116 | 0.222334174 | 0.000689389 | TRIM16     | tripartite motif containing 16 [Source:HGNC Symbol;Acc:17241]                                                |
| 5559 | ENSG00000140718 | 270.4032338 | 0.79952273   | 0.215363195 | 0.000691033 | FTO        | fat mass and obesity associated [Source:HGNC Symbol;Acc:24678]                                               |
| 5560 | ENSG00000225989 | 281.9513794 | 0.709875722  | 0.191225486 | 0.00069144  | ABCF1      | ATP-binding cassette, sub-family F (GCN20), member 1 [Source:HGNC Symbol;Acc:70]                             |
| 5561 | ENSG00000099308 | 4164.688046 | 0.26135701   | 0.070472125 | 0.00070118  | MAST3      | microtubule associated serine/threonine kinase 3 [Source:HGNC Symbol;Acc:19036]                              |
| 5562 | ENSG00000162129 | 201.250911  | -0.883695046 | 0.238291469 | 0.000701594 | CLPB       | ClpB caseinolytic peptidase B homolog (E. coli) [Source:HGNC Symbol;Acc:30664]                               |
| 5563 | ENSG00000124459 | 304.0601642 | 0.69102317   | 0.186341487 | 0.000701725 | ZNF45      | zinc finger protein 45 [Source:HGNC Symbol;Acc:13111]                                                        |
| 5564 | ENSG00000110075 | 2965.842459 | -0.302984097 | 0.08170549  | 0.000701941 | PPP6R3     | protein phosphatase 6, regulatory subunit 3 [Source:HGNC Symbol;Acc:1173]                                    |
| 5565 | ENSG00000085224 | 1971.144889 | 0.335590605  | 0.090501027 | 0.000702106 | ATRX       | alpha thalassemia/mental retardation syndrome X-linked [Source:HGNC Symbol;Acc:886]                          |
| 5566 | ENSG00000174373 | 660.4180025 | 0.483355213  | 0.130369349 | 0.000703529 | RALGAPA1   | Ral GTPase activating protein, alpha subunit 1 (catalytic) [Source:HGNC Symbol;Acc:17770]                    |

|      |                 |             |              |             |             |              |                                                                                                 |
|------|-----------------|-------------|--------------|-------------|-------------|--------------|-------------------------------------------------------------------------------------------------|
| 5567 | ENSG00000196262 | 8557.182202 | 0.191370103  | 0.05162391  | 0.000705009 | PPIA         | peptidylprolyl isomerase A (cyclophilin A) [Source:HGNC Symbol;Acc:9253]                        |
| 5568 | ENSG00000197976 | 2868.300649 | 0.324429603  | 0.087552627 | 0.000708975 | AKAP17A      | A kinase (PRKA) anchor protein 17A [Source:HGNC Symbol;Acc:18783]                               |
| 5569 | ENSG00000176340 | 1214.17729  | -0.414071059 | 0.111746981 | 0.00070914  | COX8A        | cytochrome c oxidase subunit VIIIa (ubiquitous) [Source:HGNC Symbol;Acc:2294]                   |
| 5570 | ENSG00000182149 | 5214.572652 | -0.214290283 | 0.05783404  | 0.000709493 | IST1         | increased sodium tolerance 1 homolog (yeast) [Source:HGNC Symbol;Acc:28977]                     |
| 5571 | ENSG00000072210 | 680.209133  | -0.506867612 | 0.136804548 | 0.000709961 | ALDH3A2      | aldehyde dehydrogenase 3 family, member A2 [Source:HGNC Symbol;Acc:403]                         |
| 5572 | ENSG00000006015 | 301.8579198 | 0.87348038   | 0.235781318 | 0.000711035 | C19orf60     | chromosome 19 open reading frame 60 [Source:HGNC Symbol;Acc:26098]                              |
| 5573 | ENSG00000177683 | 539.4185892 | 0.593011261  | 0.16007606  | 0.000711108 | THAP5        | THAP domain containing 5 [Source:HGNC Symbol;Acc:23188]                                         |
| 5574 | ENSG00000164236 | 22.58658035 | -1.903327487 | 0.513876806 | 0.000712871 | ANKRD33B     | ankyrin repeat domain 33B [Source:HGNC Symbol;Acc:35240]                                        |
| 5575 | ENSG00000273266 | 18.56667207 | 2.055498642  | 0.554965614 | 0.000712871 | HOXC4        | Homeobox protein Hox-C4 [Source:UniProtKB/Swiss-Prot;Acc:P09017]                                |
| 5576 | ENSG00000075275 | 59.08874844 | 1.405129306  | 0.379387667 | 0.000713176 | CELSR1       | cadherin, EGF LAG seven-pass G-type receptor 1 [Source:HGNC Symbol;Acc:1850]                    |
| 5577 | ENSG00000115827 | 437.9064969 | 0.605509831  | 0.163532949 | 0.000715862 | DCAF17       | DDB1 and CUL4 associated factor 17 [Source:HGNC Symbol;Acc:25784]                               |
| 5578 | ENSG00000105552 | 137.7907827 | 0.964932601  | 0.260652604 | 0.000717686 | BCAT2        | branched chain amino-acid transaminase 2, mitochondrial [Source:HGNC Symbol;Acc:977]            |
| 5579 | ENSG00000129250 | 1088.285278 | -0.413730418 | 0.111770309 | 0.000718617 | KIF1C        | kinesin family member 1C [Source:HGNC Symbol;Acc:6317]                                          |
| 5580 | ENSG00000205236 | 354.1506728 | 0.661850653  | 0.178855967 | 0.000721739 | RP11-514P8.6 | Uncharacterized protein [Source:UniProtKB/TrEMBL;Acc:E5RIL1]                                    |
| 5581 | ENSG00000101444 | 720.9856995 | -0.478466587 | 0.129315658 | 0.000722297 | AHCY         | adenosylhomocysteinase [Source:HGNC Symbol;Acc:343]                                             |
| 5582 | ENSG00000159658 | 2612.489174 | 0.280838103  | 0.075922807 | 0.000725678 | EFCAB14      | EF-hand calcium binding domain 14 [Source:HGNC Symbol;Acc:29051]                                |
| 5583 | ENSG00000129255 | 646.4563627 | -0.481249353 | 0.130107563 | 0.000725941 | MPDU1        | mannose-P-dolichol utilization defect 1 [Source:HGNC Symbol;Acc:7207]                           |
| 5584 | ENSG00000237008 | 6.849222933 | -2.04546649  | 0.553100939 | 0.000727753 | AL591704.5   |                                                                                                 |
| 5585 | ENSG00000114388 | 1167.91453  | 0.430136291  | 0.116340739 | 0.000730402 | NPRL2        | nitrogen permease regulator-like 2 ( <i>S. cerevisiae</i> ) [Source:HGNC Symbol;Acc:24969]      |
| 5586 | ENSG00000157540 | 2823.776992 | 0.299202521  | 0.08094313  | 0.000732321 | DYRK1A       | dual-specificity tyrosine-(Y)-phosphorylation regulated kinase 1A [Source:HGNC Symbol;Acc:3091] |
| 5587 | ENSG00000175938 | 1056.961391 | -0.377335325 | 0.102080916 | 0.000732321 | ORAI3        | ORAI calcium release-activated calcium modulator 3 [Source:HGNC Symbol;Acc:28185]               |
| 5588 | ENSG00000120949 | 215.6476715 | 0.846923329  | 0.229120597 | 0.000732321 | TNFRSF8      | tumor necrosis factor receptor superfamily, member 8 [Source:HGNC Symbol;Acc:11923]             |
| 5589 | ENSG00000139726 | 1382.109249 | 0.364466692  | 0.098606076 | 0.000732823 | DENR         | density-regulated protein [Source:HGNC Symbol;Acc:2769]                                         |
| 5590 | ENSG00000214491 | 70.45242314 | -1.272684136 | 0.34432917  | 0.000732872 | SEC14L6      | SEC14-like 6 ( <i>S. cerevisiae</i> ) [Source:HGNC Symbol;Acc:40047]                            |
| 5591 | ENSG00000176393 | 1887.299379 | -0.328786421 | 0.088964408 | 0.000733951 | RNPEP        | arginyl aminopeptidase (aminopeptidase B) [Source:HGNC Symbol;Acc:10078]                        |
| 5592 | ENSG00000198265 | 2293.44761  | -0.376095365 | 0.101774747 | 0.000734794 | HELZ         | helicase with zinc finger [Source:HGNC Symbol;Acc:16878]                                        |
| 5593 | ENSG00000229689 | 81.02757479 | -1.253650922 | 0.33929833  | 0.000736216 | AC009237.8   |                                                                                                 |
| 5594 | ENSG00000260508 | 1900.745817 | -0.301160708 | 0.081518266 | 0.000737355 | GGNBP2       | gametogenetin binding protein 2 [Source:HGNC Symbol;Acc:19357]                                  |

|      |                 |             |              |             |             |               |                                                                                                                      |
|------|-----------------|-------------|--------------|-------------|-------------|---------------|----------------------------------------------------------------------------------------------------------------------|
| 5595 | ENSG00000115594 | 1168.327225 | -0.397811216 | 0.10769119  | 0.000738372 | IL1R1         | interleukin 1 receptor, type I [Source:HGNC Symbol;Acc:5993]                                                         |
| 5596 | ENSG00000198742 | 790.2110895 | -0.429409331 | 0.116265626 | 0.000740138 | SMURF1        | SMAD specific E3 ubiquitin protein ligase 1 [Source:HGNC Symbol;Acc:16807]                                           |
| 5597 | ENSG00000034533 | 277.6176883 | 0.731408179  | 0.198042799 | 0.000740485 | ASTE1         | asteroid homolog 1 (Drosophila) [Source:HGNC Symbol;Acc:25021]                                                       |
| 5598 | ENSG00000113300 | 1351.72843  | -0.352734614 | 0.095514385 | 0.000740885 | CNOT6         | CCR4-NOT transcription complex, subunit 6 [Source:HGNC Symbol;Acc:14099]                                             |
| 5599 | ENSG00000196453 | 118.7998412 | 1.051823625  | 0.284909987 | 0.000744329 | ZNF777        | zinc finger protein 777 [Source:HGNC Symbol;Acc:22213]                                                               |
| 5600 | ENSG00000100359 | 1611.032101 | -0.442540463 | 0.119892982 | 0.00074609  | SGSM3         | small G protein signaling modulator 3 [Source:HGNC Symbol;Acc:25228]                                                 |
| 5601 | ENSG00000117640 | 1394.869397 | -0.347282712 | 0.094097834 | 0.000747346 | MTFR1L        | mitochondrial fission regulator 1-like [Source:HGNC Symbol;Acc:28836]                                                |
| 5602 | ENSG00000230869 | 43.07291182 | 1.679029948  | 0.455032106 | 0.000749391 | CTGLF10P      | centaurin, gamma-like family, member 10 pseudogene [Source:HGNC Symbol;Acc:23659]                                    |
| 5603 | ENSG00000062822 | 268.524911  | -0.848000512 | 0.230035096 | 0.000759689 | POLD1         | polymerase (DNA directed), delta 1, catalytic subunit [Source:HGNC Symbol;Acc:9175]                                  |
| 5604 | ENSG00000184270 | 18.6983671  | -1.938317098 | 0.525839379 | 0.000760321 | HIST2H2AB     | histone cluster 2, H2ab [Source:HGNC Symbol;Acc:20508]                                                               |
| 5605 | ENSG00000183960 | 46.60010371 | 1.604372587  | 0.435639316 | 0.000770215 | KCNH8         | potassium voltage-gated channel, subfamily H (eag-related), member 8 [Source:HGNC Symbol;Acc:18864]                  |
| 5606 | ENSG00000179950 | 455.1407974 | 0.583049556  | 0.158358118 | 0.000772979 | PUF60         | poly-U binding splicing factor 60kDa [Source:HGNC Symbol;Acc:17042]                                                  |
| 5607 | ENSG00000198816 | 39.56757451 | 1.766436776  | 0.479920751 | 0.000776358 | ZNF358        | zinc finger protein 358 [Source:HGNC Symbol;Acc:16838]                                                               |
| 5608 | ENSG00000198064 | 392.1092402 | -0.884087009 | 0.240272983 | 0.000779801 | RP11-347C12.1 | Putative NPIP-like protein LOC613037 [Source:UniProtKB/Swiss-Prot;Acc:A6NJU9]                                        |
| 5609 | ENSG00000184497 | 45.65159397 | -1.494791142 | 0.406399807 | 0.000783895 | TMEM255B      | transmembrane protein 255B [Source:HGNC Symbol;Acc:28297]                                                            |
| 5610 | ENSG00000214944 | 26.44650139 | 1.89949804   | 0.516477536 | 0.000784786 | ARHGEF28      | Rho guanine nucleotide exchange factor (GEF) 28 [Source:HGNC Symbol;Acc:30322]                                       |
| 5611 | ENSG00000141569 | 385.468911  | 0.660000222  | 0.179580236 | 0.000792542 | TRIM65        | tripartite motif containing 65 [Source:HGNC Symbol;Acc:27316]                                                        |
| 5612 | ENSG00000168118 | 537.423481  | -0.569013193 | 0.154842232 | 0.000793785 | RAB4A         | RAB4A, member RAS oncogene family [Source:HGNC Symbol;Acc:9781]                                                      |
| 5613 | ENSG00000170310 | 443.5702569 | -0.661543826 | 0.180034613 | 0.000794441 | STX8          | syntaxin 8 [Source:HGNC Symbol;Acc:11443]                                                                            |
| 5614 | ENSG00000006634 | 337.094791  | -0.723050212 | 0.196868144 | 0.000799832 | DBF4          | DBF4 homolog (S. cerevisiae) [Source:HGNC Symbol;Acc:17364]                                                          |
| 5615 | ENSG00000060069 | 509.9414283 | 0.629275345  | 0.171340635 | 0.000800025 | CTDP1         | CTD (carboxy-terminal domain, RNA polymerase II, polypeptide A) phosphatase, subunit 1 [Source:HGNC Symbol;Acc:2498] |
| 5616 | ENSG00000171680 | 41.77026937 | 1.612813397  | 0.439367608 | 0.00080584  | PLEKHG5       | pleckstrin homology domain containing, family G (with RhoGef domain) member 5 [Source:HGNC Symbol;Acc:29105]         |
| 5617 | ENSG00000186197 | 40.76398717 | 1.636492286  | 0.445856981 | 0.000806702 | EDARADD       | EDAR-associated death domain [Source:HGNC Symbol;Acc:14341]                                                          |
| 5618 | ENSG00000123130 | 1449.234572 | -0.383774854 | 0.104566997 | 0.000807532 | ACOT9         | acyl-CoA thioesterase 9 [Source:HGNC Symbol;Acc:17152]                                                               |
| 5619 | ENSG00000132394 | 148.8129074 | 0.966257471  | 0.263306311 | 0.000808732 | EEFSEC        | eukaryotic elongation factor, selenocysteine-tRNA-specific [Source:HGNC Symbol;Acc:24614]                            |
| 5620 | ENSG00000145365 | 358.0917662 | 0.69624042   | 0.189826881 | 0.000814757 | TIFA          | TRAF-interacting protein with forkhead-associated domain [Source:HGNC Symbol;Acc:19075]                              |
| 5621 | ENSG00000183354 | 1280.385553 | 0.369283285  | 0.100689796 | 0.000815348 | KIAA2026      | KIAA2026 [Source:HGNC Symbol;Acc:23378]                                                                              |
| 5622 | ENSG00000089597 | 4554.54849  | 0.242784841  | 0.066227985 | 0.000820444 | GANAB         | glucosidase, alpha; neutral AB [Source:HGNC Symbol;Acc:4138]                                                         |

|      |                 |             |              |             |             |           |                                                                                       |
|------|-----------------|-------------|--------------|-------------|-------------|-----------|---------------------------------------------------------------------------------------|
| 5623 | ENSG00000213516 | 538.6754046 | 0.538731579  | 0.147049081 | 0.00082763  | RBMXL1    | RNA binding motif protein, X-linked-like 1 [Source:HGNC Symbol;Acc:25073]             |
| 5624 | ENSG00000171954 | 16.5927838  | 2.021326731  | 0.551758296 | 0.000828095 | CYP4F22   | cytochrome P450, family 4, subfamily F, polypeptide 22 [Source:HGNC Symbol;Acc:26820] |
| 5625 | ENSG00000103507 | 699.8592182 | 0.491163604  | 0.134085176 | 0.000829101 | BCKDK     | branched chain ketoacid dehydrogenase kinase [Source:HGNC Symbol;Acc:16902]           |
| 5626 | ENSG00000164265 | 253.659517  | -0.719100121 | 0.196362772 | 0.000832105 | SCGB3A2   | secretoglobin, family 3A, member 2 [Source:HGNC Symbol;Acc:18391]                     |
| 5627 | ENSG00000223705 | 1843.692315 | 0.325728255  | 0.088955874 | 0.000833311 | NSUN5P1   | NOP2/Sun domain family, member 5 pseudogene 1 [Source:HGNC Symbol;Acc:19146]          |
| 5628 | ENSG00000185222 | 30.80890544 | -1.669354858 | 0.455911507 | 0.000833511 | WBP5      | WW domain binding protein 5 [Source:HGNC Symbol;Acc:30084]                            |
| 5629 | ENSG00000204178 | 584.5631089 | 0.503371088  | 0.137525471 | 0.000837844 | TMEM57    | transmembrane protein 57 [Source:HGNC Symbol;Acc:25572]                               |
| 5630 | ENSG00000011243 | 1832.990675 | 0.33641169   | 0.0919278   | 0.000839928 | AKAP8L    | A kinase (PRKA) anchor protein 8-like [Source:HGNC Symbol;Acc:29857]                  |
| 5631 | ENSG00000145107 | 35.312458   | 1.640604494  | 0.448324675 | 0.000840136 | TM4SF19   | transmembrane 4 L six family member 19 [Source:HGNC Symbol;Acc:25167]                 |
| 5632 | ENSG00000159592 | 3775.945866 | -0.23768894  | 0.064968386 | 0.000842874 | GPBP1L1   | GC-rich promoter binding protein 1-like 1 [Source:HGNC Symbol;Acc:28843]              |
| 5633 | ENSG00000261917 | 563.8952984 | 0.534139382  | 0.146046418 | 0.000846698 | MBOAT7    | membrane bound O-acyltransferase domain containing 7 [Source:HGNC Symbol;Acc:15505]   |
| 5634 | ENSG00000104979 | 595.6025018 | 0.508908379  | 0.139176362 | 0.000849041 | C19orf53  | chromosome 19 open reading frame 53 [Source:HGNC Symbol;Acc:24991]                    |
| 5635 | ENSG00000102302 | 59.37370025 | 1.368170532  | 0.374180924 | 0.000849324 | FGD1      | FYVE, RhoGEF and PH domain containing 1 [Source:HGNC Symbol;Acc:3663]                 |
| 5636 | ENSG00000166801 | 4409.838123 | -0.226359735 | 0.061915256 | 0.000850766 | FAM111A   | family with sequence similarity 111, member A [Source:HGNC Symbol;Acc:24725]          |
| 5637 | ENSG00000233209 | 10.80142734 | 2.063449355  | 0.564475068 | 0.00085208  | HLA-DQB1  | major histocompatibility complex, class II, DQ beta 1 [Source:HGNC Symbol;Acc:4944]   |
| 5638 | ENSG00000126226 | 830.8545631 | 0.411441543  | 0.112570767 | 0.000853791 | PCID2     | PCI domain containing 2 [Source:HGNC Symbol;Acc:25653]                                |
| 5639 | ENSG00000265823 | 836.0552721 | 0.464933287  | 0.127224102 | 0.000855356 | EIF2D     | eukaryotic translation initiation factor 2D [Source:HGNC Symbol;Acc:6583]             |
| 5640 | ENSG00000268849 | 76.42645388 | -1.241890048 | 0.339876217 | 0.000856857 | SIGLEC22P | sialic acid binding Ig-like lectin 22, pseudogene [Source:HGNC Symbol;Acc:15611]      |
| 5641 | ENSG00000183742 | 113.1730747 | -1.057824122 | 0.289510382 | 0.000857072 | MACC1     | metastasis associated in colon cancer 1 [Source:HGNC Symbol;Acc:30215]                |
| 5642 | ENSG00000116984 | 818.1530263 | 0.444602583  | 0.121702481 | 0.000859079 | MTR       | 5-methyltetrahydrofolate-homocysteine methyltransferase [Source:HGNC Symbol;Acc:7468] |
| 5643 | ENSG00000112031 | 555.0369986 | 0.537313414  | 0.147100816 | 0.000860616 | MTRF1L    | mitochondrial translational release factor 1-like [Source:HGNC Symbol;Acc:21051]      |
| 5644 | ENSG00000100162 | 80.06589035 | -1.189065665 | 0.32563918  | 0.000864366 | CENPM     | centromere protein M [Source:HGNC Symbol;Acc:18352]                                   |
| 5645 | ENSG00000085117 | 1852.470856 | 0.398838018  | 0.109226371 | 0.000864366 | CD82      | CD82 molecule [Source:HGNC Symbol;Acc:6210]                                           |
| 5646 | ENSG00000262053 | 564.0344317 | 0.532691511  | 0.145892089 | 0.000864921 | MBOAT7    | membrane bound O-acyltransferase domain containing 7 [Source:HGNC Symbol;Acc:15505]   |
| 5647 | ENSG00000168066 | 8070.95347  | -0.207345345 | 0.056805038 | 0.000868643 | SF1       | splicing factor 1 [Source:HGNC Symbol;Acc:12950]                                      |
| 5648 | ENSG00000138942 | 1024.856162 | 0.407321204  | 0.111594577 | 0.000868873 | RNF185    | ring finger protein 185 [Source:HGNC Symbol;Acc:26783]                                |
| 5649 | ENSG00000158122 | 137.9709294 | 0.974377888  | 0.266963918 | 0.000869261 | AAED1     | AhpC/TSA antioxidant enzyme domain containing 1 [Source:HGNC Symbol;Acc:16881]        |
| 5650 | ENSG00000249978 | 24.76922277 | 1.868725226  | 0.51205181  | 0.00087034  | TRGV7     | T cell receptor gamma variable 7 (pseudogene) [Source:HGNC Symbol;Acc:12293]          |



|      |                 |             |              |             |             |             |                                                                                                      |
|------|-----------------|-------------|--------------|-------------|-------------|-------------|------------------------------------------------------------------------------------------------------|
| 5651 | ENSG00000108091 | 506.3816589 | 0.53150893   | 0.145651435 | 0.000871204 | CCDC6       | coiled-coil domain containing 6 [Source:HGNC Symbol;Acc:18782]                                       |
| 5652 | ENSG00000260485 | 454.8671409 | 0.578410021  | 0.158537518 | 0.000873675 | PUF60       | poly-U binding splicing factor 60kDa [Source:HGNC Symbol;Acc:17042]                                  |
| 5653 | ENSG00000176386 | 471.0915821 | 0.561426712  | 0.153917931 | 0.000876365 | CDC26       | cell division cycle 26 [Source:HGNC Symbol;Acc:17839]                                                |
| 5654 | ENSG00000170604 | 164.0211528 | 0.876443     | 0.240283966 | 0.000876365 | IRF2BP1     | interferon regulatory factor 2 binding protein 1 [Source:HGNC Symbol;Acc:21728]                      |
| 5655 | ENSG00000213160 | 40.50625749 | -1.535446964 | 0.421038156 | 0.000878662 | KLHL23      | kelch-like family member 23 [Source:HGNC Symbol;Acc:27506]                                           |
| 5656 | ENSG00000015171 | 767.8557909 | 0.523673851  | 0.143627125 | 0.000881062 | ZMYND11     | zinc finger, MYND-type containing 11 [Source:HGNC Symbol;Acc:16966]                                  |
| 5657 | ENSG00000079616 | 1278.484878 | -0.389081392 | 0.10679619  | 0.000890725 | KIF22       | kinesin family member 22 [Source:HGNC Symbol;Acc:6391]                                               |
| 5658 | ENSG00000156787 | 237.7861815 | 0.746813337  | 0.205029777 | 0.000893172 | TBC1D31     | TBC1 domain family, member 31 [Source:HGNC Symbol;Acc:30888]                                         |
| 5659 | ENSG00000197275 | 78.1922682  | -1.290781012 | 0.354387687 | 0.000893631 | RAD54B      | RAD54 homolog B ( <i>S. cerevisiae</i> ) [Source:HGNC Symbol;Acc:17228]                              |
| 5660 | ENSG00000186666 | 109.1843514 | 1.138796033  | 0.312687965 | 0.000894614 | BCDIN3D     | BCDIN3 domain containing [Source:HGNC Symbol;Acc:27050]                                              |
| 5661 | ENSG00000100028 | 1033.040133 | -0.40566303  | 0.111401166 | 0.000896179 | SNRPD3      | small nuclear ribonucleoprotein D3 polypeptide 18kDa [Source:HGNC Symbol;Acc:11160]                  |
| 5662 | ENSG00000133134 | 41.55513077 | 1.609249309  | 0.442235705 | 0.000904996 | BEX2        | brain expressed X-linked 2 [Source:HGNC Symbol;Acc:30933]                                            |
| 5663 | ENSG00000182628 | 437.0467836 | -0.630907171 | 0.173393238 | 0.000905903 | SKA2        | spindle and kinetochore associated complex subunit 2 [Source:HGNC Symbol;Acc:28006]                  |
| 5664 | ENSG00000116497 | 1472.740125 | -0.355289736 | 0.097698102 | 0.000912742 | S100BPB     | S100P binding protein [Source:HGNC Symbol;Acc:25768]                                                 |
| 5665 | ENSG00000126934 | 1811.046817 | -0.306827225 | 0.084388175 | 0.000915082 | MAP2K2      | mitogen-activated protein kinase kinase 2 [Source:HGNC Symbol;Acc:6842]                              |
| 5666 | ENSG00000101574 | 485.1154411 | 0.559920566  | 0.154085552 | 0.00092231  | METTL4      | methyltransferase like 4 [Source:HGNC Symbol;Acc:24726]                                              |
| 5667 | ENSG00000163462 | 72.40893729 | 1.329526601  | 0.365916505 | 0.000923628 | TRIM46      | tripartite motif containing 46 [Source:HGNC Symbol;Acc:19019]                                        |
| 5668 | ENSG00000116604 | 2056.80126  | 0.371301012  | 0.102229368 | 0.000928407 | MEF2D       | myocyte enhancer factor 2D [Source:HGNC Symbol;Acc:6997]                                             |
| 5669 | ENSG00000156853 | 144.409034  | 1.002336502  | 0.276030782 | 0.000931088 | ZNF689      | zinc finger protein 689 [Source:HGNC Symbol;Acc:25173]                                               |
| 5670 | ENSG00000011132 | 378.5204775 | 0.70947383   | 0.195392593 | 0.000931761 | APBA3       | amyloid beta (A4) precursor protein-binding, family A, member 3 [Source:HGNC Symbol;Acc:580]         |
| 5671 | ENSG00000164039 | 243.42805   | 0.732832423  | 0.201829964 | 0.000931876 | BDH2        | 3-hydroxybutyrate dehydrogenase, type 2 [Source:HGNC Symbol;Acc:32389]                               |
| 5672 | ENSG00000153015 | 357.7665808 | -0.600046151 | 0.165294366 | 0.000934505 | CWC27       | CWC27 spliceosome-associated protein homolog ( <i>S. cerevisiae</i> ) [Source:HGNC Symbol;Acc:10664] |
| 5673 | ENSG00000179299 | 992.8179089 | -0.40165785  | 0.110656667 | 0.000935792 | NSUN7       | NOP2/Sun domain family, member 7 [Source:HGNC Symbol;Acc:25857]                                      |
| 5674 | ENSG00000183941 | 350.8686821 | -0.622454088 | 0.171490631 | 0.000935983 | HIST2H4A    | histone cluster 2, H4a [Source:HGNC Symbol;Acc:4794]                                                 |
| 5675 | ENSG00000112701 | 3507.682511 | -0.263050944 | 0.072473765 | 0.000936057 | SENPE6      | SUMO1/sentrin specific peptidase 6 [Source:HGNC Symbol;Acc:20944]                                    |
| 5676 | ENSG00000211817 | 23.59114818 | 1.870883215  | 0.515462337 | 0.000936174 | TRAV38-2DV8 | T cell receptor alpha variable 38-2/delta variable 8 [Source:HGNC Symbol;Acc:12138]                  |
| 5677 | ENSG00000131323 | 656.9147967 | -0.496317485 | 0.136758492 | 0.000937357 | TRAF3       | TNF receptor-associated factor 3 [Source:HGNC Symbol;Acc:12033]                                      |
| 5678 | ENSG00000231555 | 97.12027586 | -1.398723281 | 0.385548166 | 0.000941816 | HSPA1B      | heat shock 70kDa protein 1B [Source:HGNC Symbol;Acc:5233]                                            |

|      |                 |             |              |             |             |               |                                                                                                                              |
|------|-----------------|-------------|--------------|-------------|-------------|---------------|------------------------------------------------------------------------------------------------------------------------------|
| 5679 | ENSG00000235569 | 44.19762712 | -1.599956097 | 0.441045845 | 0.000942482 | MSH5          | mutS homolog 5 [Source:HGNC Symbol;Acc:7328]                                                                                 |
| 5680 | ENSG00000263290 | 293.1105188 | 0.711037625  | 0.196007262 | 0.000942482 | SCAMP3        | secretory carrier membrane protein 3 [Source:HGNC Symbol;Acc:10565]                                                          |
| 5681 | ENSG00000134318 | 1108.158902 | -0.438971019 | 0.121011472 | 0.000942655 | ROCK2         | Rho-associated, coiled-coil containing protein kinase 2 [Source:HGNC Symbol;Acc:10252]                                       |
| 5682 | ENSG00000017621 | 62.98283099 | -1.328420347 | 0.366388368 | 0.000949076 | MAGIX         | MAGI family member, X-linked [Source:HGNC Symbol;Acc:30006]                                                                  |
| 5683 | ENSG00000175602 | 103.9483288 | -1.173558804 | 0.323865064 | 0.000956579 | CCDC85B       | coiled-coil domain containing 85B [Source:HGNC Symbol;Acc:24926]                                                             |
| 5684 | ENSG00000149782 | 296.801933  | -0.70441455  | 0.194396852 | 0.000956579 | PLCB3         | phospholipase C, beta 3 (phosphatidylinositol-specific) [Source:HGNC Symbol;Acc:9056]                                        |
| 5685 | ENSG00000076924 | 703.247333  | 0.600216766  | 0.16564509  | 0.000956705 | XAB2          | XPA binding protein 2 [Source:HGNC Symbol;Acc:14089]                                                                         |
| 5686 | ENSG00000135624 | 1715.064229 | 0.312262404  | 0.086202011 | 0.000960473 | CCT7          | chaperonin containing TCP1, subunit 7 (eta) [Source:HGNC Symbol;Acc:1622]                                                    |
| 5687 | ENSG00000157020 | 1224.095941 | -0.355426429 | 0.098135341 | 0.000962723 | SEC13         | SEC13 homolog (S. cerevisiae) [Source:HGNC Symbol;Acc:10697]                                                                 |
| 5688 | ENSG00000171051 | 19473.65193 | 0.158030426  | 0.043635671 | 0.000963337 | FPR1          | formyl peptide receptor 1 [Source:HGNC Symbol;Acc:3826]                                                                      |
| 5689 | ENSG00000155304 | 343.0799974 | 0.636590672  | 0.175785835 | 0.000963871 | HSPA13        | heat shock protein 70kDa family, member 13 [Source:HGNC Symbol;Acc:11375]                                                    |
| 5690 | ENSG00000165948 | 108.909296  | -1.086485674 | 0.300025275 | 0.00096402  | IFI27L1       | interferon, alpha-inducible protein 27-like 1 [Source:HGNC Symbol;Acc:19754]                                                 |
| 5691 | ENSG00000198842 | 11.28407198 | 2.043334285  | 0.564362078 | 0.000966481 | DUSP27        | dual specificity phosphatase 27 (putative) [Source:HGNC Symbol;Acc:25034]                                                    |
| 5692 | ENSG00000162878 | 15.278577   | -1.989776904 | 0.549661952 | 0.000968583 | PKDCC         | protein kinase domain containing, cytoplasmic [Source:HGNC Symbol;Acc:25123]                                                 |
| 5693 | ENSG00000168826 | 246.7530336 | 0.869164974  | 0.240160169 | 0.000971771 | ZBTB49        | zinc finger and BTB domain containing 49 [Source:HGNC Symbol;Acc:19883]                                                      |
| 5694 | ENSG00000171843 | 381.9646937 | 0.801729812  | 0.221693657 | 0.00098186  | MLLT3         | myeloid/lymphoid or mixed-lineage leukemia (trithorax homolog, Drosophila); translocated to, 3 [Source:HGNC Symbol;Acc:7136] |
| 5695 | ENSG00000158714 | 96.21170662 | 1.146213472  | 0.316960672 | 0.00098215  | SLAMF8        | SLAM family member 8 [Source:HGNC Symbol;Acc:21391]                                                                          |
| 5696 | ENSG00000126550 | 141.481257  | -0.911521066 | 0.252067547 | 0.000982304 | HTN1          | histatin 1 [Source:HGNC Symbol;Acc:5283]                                                                                     |
| 5697 | ENSG00000139546 | 224.8286263 | 0.789334984  | 0.218285768 | 0.000982569 | TARBP2        | TAR (HIV-1) RNA binding protein 2 [Source:HGNC Symbol;Acc:11569]                                                             |
| 5698 | ENSG00000197124 | 70.27469522 | 1.29825178   | 0.359079211 | 0.000984523 | ZNF682        | zinc finger protein 682 [Source:HGNC Symbol;Acc:28857]                                                                       |
| 5699 | ENSG00000167004 | 3754.367757 | 0.271038404  | 0.074967285 | 0.000984655 | PDIA3         | protein disulfide isomerase family A, member 3 [Source:HGNC Symbol;Acc:4606]                                                 |
| 5700 | ENSG00000249863 | 97.02473326 | -1.156194578 | 0.319876139 | 0.00098781  | RP11-177C12.1 |                                                                                                                              |
| 5701 | ENSG00000107551 | 780.4283348 | 0.448489984  | 0.124080688 | 0.00098781  | RASSF4        | Ras association (RalGDS/AF-6) domain family member 4 [Source:HGNC Symbol;Acc:20793]                                          |
| 5702 | ENSG00000103489 | 779.4876179 | 0.557853201  | 0.154375462 | 0.000991033 | XYLT1         | xylosyltransferase I [Source:HGNC Symbol;Acc:15516]                                                                          |
| 5703 | ENSG00000131470 | 146.8114275 | -0.914128911 | 0.252985912 | 0.000991832 | PSMC3IP       | PSMC3 interacting protein [Source:HGNC Symbol;Acc:17928]                                                                     |
| 5704 | ENSG00000170088 | 275.1235148 | 0.682130688  | 0.188791311 | 0.00099247  | TMEM192       | transmembrane protein 192 [Source:HGNC Symbol;Acc:26775]                                                                     |
| 5705 | ENSG00000114439 | 1042.662074 | 0.391423964  | 0.108383936 | 0.000998784 | BBX           | bobby sox homolog (Drosophila) [Source:HGNC Symbol;Acc:14422]                                                                |
| 5706 | ENSG00000263465 | 39.67351008 | 1.638892444  | 0.453874572 | 0.001000785 | RP11-735A19.4 |                                                                                                                              |

|      |                 |             |              |             |             |              |                                                                                                                    |
|------|-----------------|-------------|--------------|-------------|-------------|--------------|--------------------------------------------------------------------------------------------------------------------|
| 5707 | ENSG00000167258 | 1817.117573 | -0.342697462 | 0.094917688 | 0.001002242 | CDK12        | cyclin-dependent kinase 12 [Source:HGNC Symbol;Acc:24224]                                                          |
| 5708 | ENSG00000240505 | 38.02237131 | 1.589241039  | 0.440209007 | 0.001003124 | TNFRSF13B    | tumor necrosis factor receptor superfamily, member 13B [Source:HGNC Symbol;Acc:18153]                              |
| 5709 | ENSG00000165714 | 130.8809505 | -1.042805928 | 0.28885849  | 0.00100335  | LOH12CR1     | loss of heterozygosity, 12, chromosomal region 1 [Source:HGNC Symbol;Acc:17950]                                    |
| 5710 | ENSG00000141698 | 51.09066797 | 1.455353857  | 0.403155513 | 0.001003893 | NT5C3B       | 5'-nucleotidase, cytosolic IIIB [Source:HGNC Symbol;Acc:28300]                                                     |
| 5711 | ENSG00000198551 | 156.3754296 | 0.8869658    | 0.245844127 | 0.001011752 | ZNF627       | zinc finger protein 627 [Source:HGNC Symbol;Acc:30570]                                                             |
| 5712 | ENSG00000211797 | 35.06574293 | 1.68011956   | 0.465702254 | 0.00101202  | TRAV17       | T cell receptor alpha variable 17 [Source:HGNC Symbol;Acc:12113]                                                   |
| 5713 | ENSG00000109016 | 373.6367887 | -0.622326527 | 0.172500553 | 0.00101202  | DHRS7B       | dehydrogenase/reductase (SDR family) member 7B [Source:HGNC Symbol;Acc:24547]                                      |
| 5714 | ENSG00000149308 | 836.343614  | 0.502106917  | 0.139200299 | 0.00101417  | NPAT         | nuclear protein, ataxia-telangiectasia locus [Source:HGNC Symbol;Acc:7896]                                         |
| 5715 | ENSG00000175066 | 653.8703732 | -0.470919843 | 0.130561493 | 0.001014777 | GK5          | glycerol kinase 5 (putative) [Source:HGNC Symbol;Acc:28635]                                                        |
| 5716 | ENSG00000059769 | 361.3327554 | -0.630702068 | 0.174868066 | 0.001015105 | DNAJC25      | DnaJ (Hsp40) homolog, subfamily C, member 25 [Source:HGNC Symbol;Acc:34187]                                        |
| 5717 | ENSG00000205572 | 265.7454399 | 0.705119055  | 0.195502178 | 0.001015105 | SERF1B       | small EDRK-rich factor 1B (centromeric) [Source:HGNC Symbol;Acc:10756]                                             |
| 5718 | ENSG00000232869 | 27.75524484 | 1.766178576  | 0.489855796 | 0.001019381 | TRBV29-1     | T cell receptor beta variable 29-1 [Source:HGNC Symbol;Acc:12210]                                                  |
| 5719 | ENSG00000123739 | 302.5735405 | -0.917104502 | 0.254363362 | 0.001019381 | PLA2G12A     | phospholipase A2, group XIIA [Source:HGNC Symbol;Acc:18554]                                                        |
| 5720 | ENSG00000196182 | 4538.621821 | 0.306294172  | 0.084952413 | 0.001019381 | STK40        | serine/threonine kinase 40 [Source:HGNC Symbol;Acc:21373]                                                          |
| 5721 | ENSG00000161999 | 249.0905735 | 0.833805926  | 0.231357186 | 0.001025116 | JMJD8        | jumonji domain containing 8 [Source:HGNC Symbol;Acc:14148]                                                         |
| 5722 | ENSG00000142156 | 30.25502609 | 1.741249969  | 0.483219146 | 0.001027067 | COL6A1       | collagen, type VI, alpha 1 [Source:HGNC Symbol;Acc:2211]                                                           |
| 5723 | ENSG00000165264 | 474.70176   | 0.533364569  | 0.148029543 | 0.00102824  | NDUFB6       | NADH dehydrogenase (ubiquinone) 1 beta subcomplex, 6, 17kDa [Source:HGNC Symbol;Acc:7701]                          |
| 5724 | ENSG00000196826 | 16.68663632 | -2.002182338 | 0.555986912 | 0.001035856 | ZNF709       |                                                                                                                    |
| 5725 | ENSG00000140795 | 118.7399582 | -0.978917574 | 0.271886929 | 0.001038363 | MYLK3        | myosin light chain kinase 3 [Source:HGNC Symbol;Acc:29826]                                                         |
| 5726 | ENSG00000222036 | 12.9941165  | 2.023285507  | 0.562039533 | 0.001040418 | POTEG        | POTE ankyrin domain family, member G [Source:HGNC Symbol;Acc:33896]                                                |
| 5727 | ENSG00000148935 | 72.62115525 | -1.240561825 | 0.344717936 | 0.001044747 | GAS2         | growth arrest-specific 2 [Source:HGNC Symbol;Acc:4167]                                                             |
| 5728 | ENSG00000243364 | 97.71617186 | 1.086578723  | 0.302038111 | 0.001049736 | EFNA4        | ephrin-A4 [Source:HGNC Symbol;Acc:3224]                                                                            |
| 5729 | ENSG00000261974 | 822.5006335 | 0.538168578  | 0.149615503 | 0.001051483 | CWC15        | CWC15 spliceosome-associated protein homolog ( <i>S. cerevisiae</i> ) [Source:HGNC Symbol;Acc:26939]               |
| 5730 | ENSG00000238243 | 50.15773345 | 1.456566255  | 0.405134827 | 0.001058383 | OR2W3        | olfactory receptor, family 2, subfamily W, member 3 [Source:HGNC Symbol;Acc:15021]                                 |
| 5731 | ENSG00000110955 | 5687.128541 | -0.212866155 | 0.059225326 | 0.001062632 | ATP5B        | ATP synthase, H <sup>+</sup> transporting, mitochondrial F1 complex, beta polypeptide [Source:HGNC Symbol;Acc:830] |
| 5732 | ENSG00000162373 | 30.32420984 | 1.747537011  | 0.486267134 | 0.001064058 | BEND5        | BEN domain containing 5 [Source:HGNC Symbol;Acc:25668]                                                             |
| 5733 | ENSG00000170903 | 211.5897072 | 0.779659451  | 0.216969184 | 0.00106538  | MSANTD4      | Myb/SANT-like DNA-binding domain containing 4 with coiled-coils [Source:HGNC Symbol;Acc:29383]                     |
| 5734 | ENSG00000259472 | 14.5042768  | 1.995444756  | 0.555399606 | 0.001067658 | RP13-996F3.3 |                                                                                                                    |

|      |                 |             |              |             |             |          |                                                                                                          |
|------|-----------------|-------------|--------------|-------------|-------------|----------|----------------------------------------------------------------------------------------------------------|
| 5735 | ENSG00000151240 | 51.32150045 | 1.462954811  | 0.407221967 | 0.00106864  | DIP2C    | DIP2 disco-interacting protein 2 homolog C ( <i>Drosophila</i> ) [Source:HGNC Symbol;Acc:29150]          |
| 5736 | ENSG00000198258 | 2383.200928 | -0.264185351 | 0.073543372 | 0.001069625 | UBL5     | ubiquitin-like 5 [Source:HGNC Symbol;Acc:13736]                                                          |
| 5737 | ENSG00000145708 | 47.69140941 | 1.458089056  | 0.405972712 | 0.001072209 | CRHBP    | corticotropin releasing hormone binding protein [Source:HGNC Symbol;Acc:2356]                            |
| 5738 | ENSG00000129988 | 14.69656217 | -2.008451704 | 0.559238088 | 0.001072639 | LBP      | lipopolysaccharide binding protein [Source:HGNC Symbol;Acc:6517]                                         |
| 5739 | ENSG00000184113 | 9.751054545 | 2.031593811  | 0.565687767 | 0.001072639 | CLDN5    | claudin 5 [Source:HGNC Symbol;Acc:2047]                                                                  |
| 5740 | ENSG00000128268 | 105.3878416 | -1.110066737 | 0.309149311 | 0.001075144 | MGAT3    | mannosyl (beta-1,4-)-glycoprotein beta-1,4-N-acetylglucosaminyltransferase [Source:HGNC Symbol;Acc:7046] |
| 5741 | ENSG00000174611 | 128.8975148 | 1.001287078  | 0.27885795  | 0.001075144 | KY       | kyphoscoliosis peptidase [Source:HGNC Symbol;Acc:26576]                                                  |
| 5742 | ENSG00000162065 | 275.789923  | -0.762544755 | 0.212415272 | 0.001078234 | TBC1D24  | TBC1 domain family, member 24 [Source:HGNC Symbol;Acc:29203]                                             |
| 5743 | ENSG00000115350 | 347.6359718 | -0.619066266 | 0.172454096 | 0.001078593 | POLE4    | polymerase (DNA-directed), epsilon 4, accessory subunit [Source:HGNC Symbol;Acc:18755]                   |
| 5744 | ENSG00000171595 | 17.92372996 | 1.96100664   | 0.546308503 | 0.001079175 | DNAI2    | dynein, axonemal, intermediate chain 2 [Source:HGNC Symbol;Acc:18744]                                    |
| 5745 | ENSG00000188822 | 277.5099134 | 0.697927097  | 0.1944461   | 0.001080024 | CNR2     | cannabinoid receptor 2 (macrophage) [Source:HGNC Symbol;Acc:2160]                                        |
| 5746 | ENSG00000134852 | 412.3660869 | 0.835984254  | 0.232933534 | 0.001081368 | CLOCK    | clock circadian regulator [Source:HGNC Symbol;Acc:2082]                                                  |
| 5747 | ENSG00000239855 | 19.98269722 | -1.855199498 | 0.517088895 | 0.00108601  | IGKV1-6  | immunoglobulin kappa variable 1-6 [Source:HGNC Symbol;Acc:5742]                                          |
| 5748 | ENSG00000116521 | 292.9784241 | 0.704996402  | 0.196511261 | 0.001086714 | SCAMP3   | secretory carrier membrane protein 3 [Source:HGNC Symbol;Acc:10565]                                      |
| 5749 | ENSG00000232367 | 205.574696  | 0.820128758  | 0.228650933 | 0.00108964  | TAP1     | transporter 1, ATP-binding cassette, sub-family B (MDR/TAP) [Source:HGNC Symbol;Acc:43]                  |
| 5750 | ENSG00000140365 | 544.0590941 | -0.501594487 | 0.139865396 | 0.001091749 | COMMD4   | COMM domain containing 4 [Source:HGNC Symbol;Acc:26027]                                                  |
| 5751 | ENSG00000153406 | 582.6246559 | 0.503770748  | 0.140485131 | 0.001092938 | NMRAL1   | NmrA-like family domain containing 1 [Source:HGNC Symbol;Acc:24987]                                      |
| 5752 | ENSG00000085465 | 93.2064447  | 1.148429559  | 0.320313348 | 0.001095284 | OVGP1    | oviductal glycoprotein 1, 120kDa [Source:HGNC Symbol;Acc:8524]                                           |
| 5753 | ENSG00000261794 | 97.76927595 | -1.116339344 | 0.311423479 | 0.001098022 | GOLGA8H  | golgin A8 family, member H [Source:HGNC Symbol;Acc:37443]                                                |
| 5754 | ENSG00000014919 | 843.6548585 | -0.408268843 | 0.113916587 | 0.001100807 | COX15    | cytochrome c oxidase assembly homolog 15 (yeast) [Source:HGNC Symbol;Acc:2263]                           |
| 5755 | ENSG00000135778 | 416.3200973 | 0.600160372  | 0.167468334 | 0.001101474 | NTPCR    | nucleoside-triphosphatase, cancer-related [Source:HGNC Symbol;Acc:28204]                                 |
| 5756 | ENSG00000159189 | 12.81837894 | -1.988250795 | 0.554808516 | 0.001101511 | C1QC     | complement component 1, q subcomponent, C chain [Source:HGNC Symbol;Acc:1245]                            |
| 5757 | ENSG00000221946 | 34.67717048 | 1.65187922   | 0.460961453 | 0.001101759 | FXYD7    | FXYD domain containing ion transport regulator 7 [Source:HGNC Symbol;Acc:4034]                           |
| 5758 | ENSG00000114450 | 416.8770413 | -0.559110387 | 0.156022643 | 0.001101759 | GNB4     | guanine nucleotide binding protein (G protein), beta polypeptide 4 [Source:HGNC Symbol;Acc:20731]        |
| 5759 | ENSG00000178965 | 9.716877196 | 2.02847368   | 0.566383741 | 0.001110348 | C1orf173 | chromosome 1 open reading frame 173 [Source:HGNC Symbol;Acc:25346]                                       |
| 5760 | ENSG00000137275 | 1777.654215 | 0.314553159  | 0.087830231 | 0.001110456 | RIPK1    | receptor (TNFRSF)-interacting serine-threonine kinase 1 [Source:HGNC Symbol;Acc:10019]                   |
| 5761 | ENSG00000117133 | 482.1750695 | 0.546224087  | 0.152537807 | 0.001112251 | RPF1     | ribosome production factor 1 homolog ( <i>S. cerevisiae</i> ) [Source:HGNC Symbol;Acc:30350]             |
| 5762 | ENSG00000254505 | 806.3251656 | 0.415614135  | 0.116068628 | 0.001112686 | CHMP4A   | charged multivesicular body protein 4A [Source:HGNC Symbol;Acc:20274]                                    |

|      |                 |             |              |             |             |            |                                                                                              |
|------|-----------------|-------------|--------------|-------------|-------------|------------|----------------------------------------------------------------------------------------------|
| 5763 | ENSG00000071205 | 116.9485942 | 1.015939303  | 0.283769816 | 0.00111509  | ARHGAP10   | Rho GTPase activating protein 10 [Source:HGNC Symbol;Acc:26099]                              |
| 5764 | ENSG00000211801 | 26.39158305 | 1.779566243  | 0.497099285 | 0.001115971 | TRAV21     | T cell receptor alpha variable 21 [Source:HGNC Symbol;Acc:12118]                             |
| 5765 | ENSG00000142784 | 3245.333156 | -0.261887838 | 0.073159179 | 0.001116641 | WDTC1      | WD and tetratricopeptide repeats 1 [Source:HGNC Symbol;Acc:29175]                            |
| 5766 | ENSG00000211897 | 81.41259145 | -1.153391632 | 0.322266729 | 0.001119219 | IGHG3      | immunoglobulin heavy constant gamma 3 (G3m marker) [Source:HGNC Symbol;Acc:5527]             |
| 5767 | ENSG00000270355 | 81.41259145 | -1.153391632 | 0.322266729 | 0.001119219 | IGHG3      | immunoglobulin heavy constant gamma 3 (G3m marker) [Source:HGNC Symbol;Acc:5527]             |
| 5768 | ENSG00000095951 | 535.1563562 | 0.525187117  | 0.146742928 | 0.001119219 | HIVEP1     | human immunodeficiency virus type I enhancer binding protein 1 [Source:HGNC Symbol;Acc:4920] |
| 5769 | ENSG00000197381 | 414.2126108 | 0.570406753  | 0.159380196 | 0.001119257 | ADARB1     | adenosine deaminase, RNA-specific, B1 [Source:HGNC Symbol;Acc:226]                           |
| 5770 | ENSG00000214530 | 508.1068254 | 0.615845329  | 0.172162882 | 0.001126783 | STARD10    | StAR-related lipid transfer (START) domain containing 10 [Source:HGNC Symbol;Acc:10666]      |
| 5771 | ENSG00000260424 | 35.03849558 | 1.819956814  | 0.508787721 | 0.00112686  | TRBV19     | T cell receptor beta variable 19 [Source:HGNC Symbol;Acc:12194]                              |
| 5772 | ENSG00000248594 | 244.7036252 | 0.722565636  | 0.202007515 | 0.001127186 | AC003029.1 |                                                                                              |
| 5773 | ENSG00000203817 | 32.55669345 | -1.795867835 | 0.502146284 | 0.001129323 | FAM72C     | family with sequence similarity 72, member C [Source:HGNC Symbol;Acc:30602]                  |
| 5774 | ENSG00000144747 | 1524.277436 | 0.450796222  | 0.126052463 | 0.001129668 | TMF1       | TATA element modulatory factor 1 [Source:HGNC Symbol;Acc:11870]                              |
| 5775 | ENSG00000167632 | 639.8040995 | -0.502336028 | 0.140470005 | 0.00113012  | TRAPPC9    | trafficking protein particle complex 9 [Source:HGNC Symbol;Acc:30832]                        |
| 5776 | ENSG00000151693 | 70.2003058  | 1.214015584  | 0.339526683 | 0.001132074 | ASAP2      | ArfGAP with SH3 domain, ankyrin repeat and PH domain 2 [Source:HGNC Symbol;Acc:2721]         |
| 5777 | ENSG00000188783 | 102.6541138 | -1.109757735 | 0.310397917 | 0.001133338 | PRELP      | proline/arginine-rich end leucine-rich repeat protein [Source:HGNC Symbol;Acc:9357]          |
| 5778 | ENSG00000092096 | 37.46793793 | 1.660832312  | 0.46456097  | 0.001134081 | SLC22A17   | solute carrier family 22, member 17 [Source:HGNC Symbol;Acc:23095]                           |
| 5779 | ENSG00000248099 | 22.69521037 | 1.84495634   | 0.516212399 | 0.001138366 | INSL3      | insulin-like 3 (Leydig cell) [Source:HGNC Symbol;Acc:6086]                                   |
| 5780 | ENSG00000232005 | 131.4362061 | -0.954627861 | 0.267129288 | 0.001139783 | PBX2       | pre-B-cell leukemia homeobox 2 [Source:HGNC Symbol;Acc:8633]                                 |
| 5781 | ENSG00000119714 | 190.9850867 | 1.022440856  | 0.286153759 | 0.001142235 | GPR68      | G protein-coupled receptor 68 [Source:HGNC Symbol;Acc:4519]                                  |
| 5782 | ENSG00000143149 | 1121.208    | 0.453346194  | 0.126882858 | 0.001142458 | ALDH9A1    | aldehyde dehydrogenase 9 family, member A1 [Source:HGNC Symbol;Acc:412]                      |
| 5783 | ENSG00000121864 | 400.9723378 | 0.628472435  | 0.175930595 | 0.001145213 | ZNF639     | zinc finger protein 639 [Source:HGNC Symbol;Acc:30950]                                       |
| 5784 | ENSG00000176783 | 1471.015924 | 0.332733131  | 0.093160686 | 0.00114795  | RUFY1      | RUN and FYVE domain containing 1 [Source:HGNC Symbol;Acc:19760]                              |
| 5785 | ENSG00000129968 | 1298.606611 | 0.960550629  | 0.269035928 | 0.001153292 | ABHD17A    | abhydrolase domain containing 17A [Source:HGNC Symbol;Acc:28756]                             |
| 5786 | ENSG00000182217 | 323.5317746 | -0.61949882  | 0.173524454 | 0.001154186 | HIST2H4B   | histone cluster 2, H4b [Source:HGNC Symbol;Acc:29607]                                        |
| 5787 | ENSG00000116133 | 259.4758004 | -0.694059227 | 0.194421081 | 0.001154951 | DHCR24     | 24-dehydrocholesterol reductase [Source:HGNC Symbol;Acc:2859]                                |
| 5788 | ENSG00000187145 | 519.0731776 | 0.519101118  | 0.145470284 | 0.001161125 | MRPS21     | mitochondrial ribosomal protein S21 [Source:HGNC Symbol;Acc:14046]                           |
| 5789 | ENSG00000122012 | 73.92195384 | -1.578426103 | 0.442343585 | 0.001161404 | SV2C       | synaptic vesicle glycoprotein 2C [Source:HGNC Symbol;Acc:30670]                              |
| 5790 | ENSG00000180758 | 272.0167432 | 0.703767889  | 0.19726459  | 0.001164272 | GPR157     | G protein-coupled receptor 157 [Source:HGNC Symbol;Acc:23687]                                |

|      |                 |             |              |             |             |           |                                                                                                   |
|------|-----------------|-------------|--------------|-------------|-------------|-----------|---------------------------------------------------------------------------------------------------|
| 5791 | ENSG00000168872 | 625.5219003 | 0.460093471  | 0.128973809 | 0.001165377 | DDX19A    | DEAD (Asp-Glu-Ala-Asp) box polypeptide 19A [Source:HGNC Symbol;Acc:25628]                         |
| 5792 | ENSG00000182768 | 549.2563809 | 0.50206376   | 0.140780833 | 0.001169902 | NGRN      | neugrin, neurite outgrowth associated [Source:HGNC Symbol;Acc:18077]                              |
| 5793 | ENSG00000181830 | 221.5209378 | 0.767056167  | 0.215201292 | 0.001178264 | SLC35C1   | solute carrier family 35 (GDP-fucose transporter), member C1 [Source:HGNC Symbol;Acc:20197]       |
| 5794 | ENSG00000182220 | 3331.059586 | -0.263275377 | 0.07387707  | 0.001181076 | ATP6AP2   | ATPase, H <sup>+</sup> transporting, lysosomal accessory protein 2 [Source:HGNC Symbol;Acc:18305] |
| 5795 | ENSG00000087903 | 449.4960012 | 0.667038004  | 0.187189246 | 0.001182013 | RFX2      | regulatory factor X, 2 (influences HLA class II expression) [Source:HGNC Symbol;Acc:9983]         |
| 5796 | ENSG00000173715 | 107.1366415 | 1.150745496  | 0.322946229 | 0.001182572 | C11orf80  | chromosome 11 open reading frame 80 [Source:HGNC Symbol;Acc:26197]                                |
| 5797 | ENSG00000159685 | 22.64564109 | 1.8139717    | 0.509221688 | 0.001187014 | CHCHD6    | coiled-coil-helix-coiled-coil-helix domain containing 6 [Source:HGNC Symbol;Acc:28184]            |
| 5798 | ENSG00000236884 | 9.782828259 | 2.010560177  | 0.564654775 | 0.001193857 | HLA-DRB1  | major histocompatibility complex, class II, DR beta 1 [Source:HGNC Symbol;Acc:4948]               |
| 5799 | ENSG00000055950 | 378.7384598 | 0.575417495  | 0.161637432 | 0.00119712  | MRPL43    | mitochondrial ribosomal protein L43 [Source:HGNC Symbol;Acc:14517]                                |
| 5800 | ENSG00000085274 | 495.7409507 | 0.561329011  | 0.157696739 | 0.001198646 | MYNN      | myoneurin [Source:HGNC Symbol;Acc:14955]                                                          |
| 5801 | ENSG00000198113 | 352.5062213 | -0.665093034 | 0.186875579 | 0.00120087  | TOR4A     | torsin family 4, member A [Source:HGNC Symbol;Acc:25981]                                          |
| 5802 | ENSG00000215252 | 6172.015195 | 0.21150335   | 0.059428547 | 0.001200952 | GOLGA8B   | golgin A8 family, member B [Source:HGNC Symbol;Acc:31973]                                         |
| 5803 | ENSG00000261450 | 28.41893629 | 1.727597887  | 0.48567098  | 0.001209072 | TRBV29-1  | T cell receptor beta variable 29-1 [Source:HGNC Symbol;Acc:12210]                                 |
| 5804 | ENSG00000198791 | 1420.628538 | 0.356264128  | 0.100157901 | 0.001209377 | CNOT7     | CCR4-NOT transcription complex, subunit 7 [Source:HGNC Symbol;Acc:14101]                          |
| 5805 | ENSG00000081320 | 6807.827308 | 0.20031367   | 0.056324616 | 0.001211981 | STK17B    | serine/threonine kinase 17b [Source:HGNC Symbol;Acc:11396]                                        |
| 5806 | ENSG00000129757 | 82.97602696 | 1.206971082  | 0.339386411 | 0.001212147 | CDKN1C    | cyclin-dependent kinase inhibitor 1C (p57, Kip2) [Source:HGNC Symbol;Acc:1786]                    |
| 5807 | ENSG00000177570 | 75.87144746 | 1.47483134   | 0.414807689 | 0.001215979 | SAMD12    | sterile alpha motif domain containing 12 [Source:HGNC Symbol;Acc:31750]                           |
| 5808 | ENSG00000166741 | 102.209972  | -1.162577329 | 0.327024165 | 0.001217798 | NNMT      | nicotinamide N-methyltransferase [Source:HGNC Symbol;Acc:7861]                                    |
| 5809 | ENSG00000214194 | 195.2578365 | 0.776874732  | 0.218535195 | 0.001218059 | LINC00998 | long intergenic non-protein coding RNA 998 [Source:HGNC Symbol;Acc:48953]                         |
| 5810 | ENSG00000261493 | 116.7499157 | 1.128999077  | 0.317730673 | 0.001225268 | REXO4     | REX4, RNA exonuclease 4 homolog (S. cerevisiae) [Source:HGNC Symbol;Acc:12820]                    |
| 5811 | ENSG00000170848 | 102.6814417 | -1.075784351 | 0.302809287 | 0.001228008 | PSG6      | pregnancy specific beta-1-glycoprotein 6 [Source:HGNC Symbol;Acc:9523]                            |
| 5812 | ENSG00000117448 | 685.116475  | 0.449560242  | 0.126542486 | 0.001228008 | AKR1A1    | aldo-keto reductase family 1, member A1 (aldehyde reductase) [Source:HGNC Symbol;Acc:380]         |
| 5813 | ENSG00000198933 | 748.5358806 | 0.534750256  | 0.150570347 | 0.001233151 | TBKBP1    | TBK1 binding protein 1 [Source:HGNC Symbol;Acc:30140]                                             |
| 5814 | ENSG00000162062 | 29.60289583 | -1.628005118 | 0.458505852 | 0.001236801 | C16orf59  | chromosome 16 open reading frame 59 [Source:HGNC Symbol;Acc:25849]                                |
| 5815 | ENSG00000118492 | 116.4752849 | -1.000142727 | 0.281814185 | 0.001244734 | ADGB      | androglobin [Source:HGNC Symbol;Acc:21212]                                                        |
| 5816 | ENSG00000134545 | 94.07998881 | 1.137499907  | 0.320521742 | 0.001244734 | KLRC1     | killer cell lectin-like receptor subfamily C, member 1 [Source:HGNC Symbol;Acc:6374]              |
| 5817 | ENSG00000009335 | 1407.733626 | -0.379614495 | 0.106981671 | 0.001246857 | UBE3C     | ubiquitin protein ligase E3C [Source:HGNC Symbol;Acc:16803]                                       |
| 5818 | ENSG00000165675 | 194.6235757 | 0.817591725  | 0.230442633 | 0.001248955 | ENOX2     | ecto-NOX disulfide-thiol exchanger 2 [Source:HGNC Symbol;Acc:2259]                                |

|      |                 |             |              |             |             |          |                                                                                                                        |
|------|-----------------|-------------|--------------|-------------|-------------|----------|------------------------------------------------------------------------------------------------------------------------|
| 5819 | ENSG00000206485 | 169.593739  | -0.85505359  | 0.241113067 | 0.001256549 | PPP1R18  | protein phosphatase 1, regulatory subunit 18 [Source:HGNC Symbol;Acc:29413]                                            |
| 5820 | ENSG00000104915 | 3209.295155 | -0.307158854 | 0.0866165   | 0.00125673  | STX10    | syntaxin 10 [Source:HGNC Symbol;Acc:11428]                                                                             |
| 5821 | ENSG00000198783 | 388.7910757 | 0.59908315   | 0.16894031  | 0.001256849 | ZNF830   | zinc finger protein 830 [Source:HGNC Symbol;Acc:28291]                                                                 |
| 5822 | ENSG00000183751 | 190.6593941 | 0.96591384   | 0.272437694 | 0.001259853 | TBL3     | transducin (beta)-like 3 [Source:HGNC Symbol;Acc:11587]                                                                |
| 5823 | ENSG00000103199 | 191.1511065 | 0.825494355  | 0.232856389 | 0.001261403 | ZNF500   | zinc finger protein 500 [Source:HGNC Symbol;Acc:23716]                                                                 |
| 5824 | ENSG00000170949 | 880.8656265 | 0.450208864  | 0.127003864 | 0.001262314 | ZNF160   | zinc finger protein 160 [Source:HGNC Symbol;Acc:12948]                                                                 |
| 5825 | ENSG00000115825 | 757.8829679 | 0.46920012   | 0.132373998 | 0.001263727 | PRKD3    | protein kinase D3 [Source:HGNC Symbol;Acc:9408]                                                                        |
| 5826 | ENSG0000050030  | 16.75628837 | 1.920407222  | 0.541813269 | 0.001263969 | KIAA2022 | KIAA2022 [Source:HGNC Symbol;Acc:29433]                                                                                |
| 5827 | ENSG00000159173 | 34.46583312 | -1.589404575 | 0.448662649 | 0.001272745 | TNNI1    | troponin I type 1 (skeletal, slow) [Source:HGNC Symbol;Acc:11945]                                                      |
| 5828 | ENSG00000186432 | 2096.915908 | -0.348395947 | 0.098396663 | 0.001281282 | KPNA4    | karyopherin alpha 4 (importin alpha 3) [Source:HGNC Symbol;Acc:6397]                                                   |
| 5829 | ENSG00000132359 | 4203.252056 | -0.239712325 | 0.067716607 | 0.001284791 | RAP1GAP2 | RAP1 GTPase activating protein 2 [Source:HGNC Symbol;Acc:29176]                                                        |
| 5830 | ENSG00000180011 | 1316.484195 | -0.369753923 | 0.104452708 | 0.001284791 | ZADH2    | zinc binding alcohol dehydrogenase domain containing 2 [Source:HGNC Symbol;Acc:28697]                                  |
| 5831 | ENSG00000166123 | 58.93477635 | -1.430275655 | 0.404069581 | 0.001285741 | GPT2     | glutamic pyruvate transaminase (alanine aminotransferase) 2 [Source:HGNC Symbol;Acc:18062]                             |
| 5832 | ENSG00000271481 | 8759.944159 | 0.217732932  | 0.06151315  | 0.001285816 | LILRB2   | leukocyte immunoglobulin-like receptor, subfamily B (with TM and ITIM domains), member 2 [Source:HGNC Symbol;Acc:6606] |
| 5833 | ENSG00000172296 | 162.5919189 | -0.880867873 | 0.248867383 | 0.001285961 | SPTLC3   | serine palmitoyltransferase, long chain base subunit 3 [Source:HGNC Symbol;Acc:16253]                                  |
| 5834 | ENSG00000116906 | 1065.898296 | -0.431401483 | 0.121882184 | 0.001285961 | GNPAT    | glyceronephosphate O-acyltransferase [Source:HGNC Symbol;Acc:4416]                                                     |
| 5835 | ENSG00000145819 | 4694.043465 | 0.22028022   | 0.062245331 | 0.001288629 | ARHGAP26 | Rho GTPase activating protein 26 [Source:HGNC Symbol;Acc:17073]                                                        |
| 5836 | ENSG00000105784 | 23.33297257 | -1.782142935 | 0.503621395 | 0.001289616 | RUNDC3B  | RUN domain containing 3B [Source:HGNC Symbol;Acc:30286]                                                                |
| 5837 | ENSG00000106853 | 105.130097  | -1.046408215 | 0.29588773  | 0.001299945 | PTGR1    | prostaglandin reductase 1 [Source:HGNC Symbol;Acc:18429]                                                               |
| 5838 | ENSG00000174574 | 1864.699594 | 0.311265803  | 0.088051413 | 0.001306916 | AKIRIN1  | akirin 1 [Source:HGNC Symbol;Acc:25744]                                                                                |
| 5839 | ENSG00000172752 | 5.767910182 | -1.884424998 | 0.53313139  | 0.001308725 | COL6A5   | collagen, type VI, alpha 5 [Source:HGNC Symbol;Acc:26674]                                                              |
| 5840 | ENSG00000160766 | 333.1291224 | -0.718703382 | 0.203393599 | 0.001313838 | GBAP1    | glucosidase, beta, acid pseudogene 1 [Source:HGNC Symbol;Acc:4178]                                                     |
| 5841 | ENSG00000132781 | 256.1665312 | 0.741653148  | 0.209940146 | 0.001317947 | MUTYH    | mutY homolog [Source:HGNC Symbol;Acc:7527]                                                                             |
| 5842 | ENSG00000118655 | 199.4368351 | -0.770220534 | 0.218039815 | 0.001318779 | DCLRE1B  | DNA cross-link repair 1B [Source:HGNC Symbol;Acc:17641]                                                                |
| 5843 | ENSG00000116863 | 465.669538  | 0.55365064   | 0.156748245 | 0.001320427 | ADPRHL2  | ADP-ribosylhydrolase like 2 [Source:HGNC Symbol;Acc:21304]                                                             |
| 5844 | ENSG00000115652 | 820.9262786 | 0.434204181  | 0.122961097 | 0.001324546 | UXS1     | UDP-glucuronate decarboxylase 1 [Source:HGNC Symbol;Acc:17729]                                                         |
| 5845 | ENSG00000262900 | 104.1447347 | 1.094193111  | 0.309886472 | 0.001325741 | LILRA1   | leukocyte immunoglobulin-like receptor, subfamily A (with TM domain), member 1 [Source:HGNC Symbol;Acc:6602]           |
| 5846 | ENSG00000196407 | 32.83790447 | 1.731270984  | 0.490385269 | 0.001328113 | THEM5    | thioesterase superfamily member 5 [Source:HGNC Symbol;Acc:26755]                                                       |

|      |                 |             |              |             |             |            |                                                                                                           |
|------|-----------------|-------------|--------------|-------------|-------------|------------|-----------------------------------------------------------------------------------------------------------|
| 5847 | ENSG00000171813 | 74.09538594 | 1.399508586  | 0.396470593 | 0.001330429 | PWWP2B     | PWWP domain containing 2B [Source:HGNC Symbol;Acc:25150]                                                  |
| 5848 | ENSG00000150753 | 2495.890918 | -0.286002224 | 0.081023245 | 0.001330429 | CCT5       | chaperonin containing TCP1, subunit 5 (epsilon) [Source:HGNC Symbol;Acc:1618]                             |
| 5849 | ENSG00000188033 | 139.8737895 | -0.926755458 | 0.262561686 | 0.001331264 | ZNF490     | zinc finger protein 490 [Source:HGNC Symbol;Acc:23705]                                                    |
| 5850 | ENSG00000061987 | 2061.251343 | -0.371016997 | 0.105123123 | 0.001332601 | MON2       | MON2 homolog (S. cerevisiae) [Source:HGNC Symbol;Acc:29177]                                               |
| 5851 | ENSG00000137752 | 4935.368949 | 0.245184131  | 0.069474906 | 0.001333649 | CASP1      | caspase 1, apoptosis-related cysteine peptidase [Source:HGNC Symbol;Acc:1499]                             |
| 5852 | ENSG00000113558 | 3080.123641 | 0.2600408    | 0.073693745 | 0.001335614 | SKP1       | S-phase kinase-associated protein 1 [Source:HGNC Symbol;Acc:10899]                                        |
| 5853 | ENSG00000116704 | 459.5585903 | 0.523093785  | 0.148251637 | 0.001336649 | SLC35D1    | solute carrier family 35 (UDP-GlcA/UDP-GalNAc transporter), member D1 [Source:HGNC Symbol;Acc:20800]      |
| 5854 | ENSG00000256553 | 26.98107406 | 1.77053318   | 0.501936233 | 0.001341538 | TRAV1-2    | T cell receptor alpha variable 1-2 [Source:HGNC Symbol;Acc:12102]                                         |
| 5855 | ENSG00000104412 | 386.2511514 | -0.600162559 | 0.17017575  | 0.001344782 | EMC2       | ER membrane protein complex subunit 2 [Source:HGNC Symbol;Acc:28963]                                      |
| 5856 | ENSG00000101558 | 3224.776194 | -0.260869344 | 0.073989273 | 0.001349381 | VAPA       | VAMP (vesicle-associated membrane protein)-associated protein A, 33kDa [Source:HGNC Symbol;Acc:12648]     |
| 5857 | ENSG00000166780 | 195.8544162 | 0.84589919   | 0.240028178 | 0.001357357 | C16orf45   | chromosome 16 open reading frame 45 [Source:HGNC Symbol;Acc:19213]                                        |
| 5858 | ENSG00000137714 | 209.8686412 | 0.759841616  | 0.215611697 | 0.001357359 | FDX1       | ferredoxin 1 [Source:HGNC Symbol;Acc:3638]                                                                |
| 5859 | ENSG00000271425 | 573.9427893 | 0.4969918    | 0.14103043  | 0.001357724 | AC239799.1 | neuroblastoma breakpoint family member 14 [Source:RefSeq peptide;Acc:NP_056198]                           |
| 5860 | ENSG00000065243 | 3434.101529 | 0.365551266  | 0.103758898 | 0.001362216 | PKN2       | protein kinase N2 [Source:HGNC Symbol;Acc:9406]                                                           |
| 5861 | ENSG00000132463 | 1005.21116  | 0.380532244  | 0.108019141 | 0.001363326 | GRSF1      | G-rich RNA sequence binding factor 1 [Source:HGNC Symbol;Acc:4610]                                        |
| 5862 | ENSG00000006074 | 6.746141281 | -1.930286206 | 0.547946331 | 0.001363388 | CCL18      | chemokine (C-C motif) ligand 18 (pulmonary and activation-regulated) [Source:HGNC Symbol;Acc:10616]       |
| 5863 | ENSG00000175416 | 510.5561552 | 0.55081945   | 0.156405598 | 0.001368451 | CLTB       | clathrin, light chain B [Source:HGNC Symbol;Acc:2091]                                                     |
| 5864 | ENSG00000158109 | 2179.726605 | 0.271713704  | 0.077154488 | 0.001368494 | TPRG1L     | tumor protein p63 regulated 1-like [Source:HGNC Symbol;Acc:27007]                                         |
| 5865 | ENSG00000185838 | 45.53029193 | 1.537419901  | 0.436620966 | 0.001370876 | GNB1L      | guanine nucleotide binding protein (G protein), beta polypeptide 1-like [Source:HGNC Symbol;Acc:4397]     |
| 5866 | ENSG00000173113 | 1247.531007 | 0.344594934  | 0.0978727   | 0.001372345 | TRMT112    | tRNA methyltransferase 11-2 homolog (S. cerevisiae) [Source:HGNC Symbol;Acc:26940]                        |
| 5867 | ENSG00000169598 | 323.7427499 | 0.626585974  | 0.177970744 | 0.001372751 | DFFB       | DNA fragmentation factor, 40kDa, beta polypeptide (caspase-activated DNase) [Source:HGNC Symbol;Acc:2773] |
| 5868 | ENSG00000179899 | 67.21384216 | 1.302612546  | 0.370201897 | 0.001383271 | PHC1P1     | polyhomeotic homolog 1 (Drosophila) pseudogene 1 [Source:HGNC Symbol;Acc:34502]                           |
| 5869 | ENSG00000144021 | 1593.654469 | 0.302728625  | 0.086049064 | 0.001385836 | CIAO1      | cytosolic iron-sulfur protein assembly 1 [Source:HGNC Symbol;Acc:14280]                                   |
| 5870 | ENSG00000125844 | 1052.97516  | -0.400945242 | 0.113967305 | 0.001385836 | RRBP1      | ribosome binding protein 1 [Source:HGNC Symbol;Acc:10448]                                                 |
| 5871 | ENSG00000075234 | 641.4002769 | 0.45577623   | 0.129560553 | 0.001386696 | TTC38      | tetratricopeptide repeat domain 38 [Source:HGNC Symbol;Acc:26082]                                         |
| 5872 | ENSG00000115392 | 356.8989392 | -0.585445604 | 0.166426041 | 0.001387036 | FANCL      | Fanconi anemia, complementation group L [Source:HGNC Symbol;Acc:20748]                                    |
| 5873 | ENSG00000169410 | 651.4419185 | -0.476275996 | 0.135399878 | 0.001387852 | PTPN9      | protein tyrosine phosphatase, non-receptor type 9 [Source:HGNC Symbol;Acc:9661]                           |
| 5874 | ENSG00000178537 | 767.2542052 | -0.43931347  | 0.12490082  | 0.001388937 | SLC25A20   | solute carrier family 25 (carnitine/acylcarnitine translocase), member 20 [Source:HGNC Symbol;Acc:1421]   |



|      |                 |             |              |             |             |          |                                                                                                     |
|------|-----------------|-------------|--------------|-------------|-------------|----------|-----------------------------------------------------------------------------------------------------|
| 5875 | ENSG00000165475 | 104.4374008 | 1.022615797  | 0.290772328 | 0.001390812 | CRYL1    | crystallin, lambda 1 [Source:HGNC Symbol;Acc:18246]                                                 |
| 5876 | ENSG00000153707 | 207.3246022 | 1.943697961  | 0.55270896  | 0.001391728 | PTPRD    | protein tyrosine phosphatase, receptor type, D [Source:HGNC Symbol;Acc:9668]                        |
| 5877 | ENSG00000130731 | 270.2825814 | 0.739259999  | 0.21032276  | 0.001400913 | C16orf13 | chromosome 16 open reading frame 13 [Source:HGNC Symbol;Acc:14141]                                  |
| 5878 | ENSG00000101665 | 370.4647674 | 0.666829668  | 0.189770179 | 0.001405976 | SMAD7    | SMAD family member 7 [Source:HGNC Symbol;Acc:6773]                                                  |
| 5879 | ENSG00000128989 | 2912.96115  | 0.242551158  | 0.06903673  | 0.001408471 | ARPP19   | cAMP-regulated phosphoprotein, 19kDa [Source:HGNC Symbol;Acc:16967]                                 |
| 5880 | ENSG00000264820 | 40.39224105 | -1.492351886 | 0.424794505 | 0.001409552 | FAM72B   | family with sequence similarity 72, member B [Source:HGNC Symbol;Acc:24805]                         |
| 5881 | ENSG00000099624 | 210.3955086 | 0.824137921  | 0.234600452 | 0.001410227 | ATP5D    | ATP synthase, H+ transporting, mitochondrial F1 complex, delta subunit [Source:HGNC Symbol;Acc:837] |
| 5882 | ENSG00000107719 | 58.75315915 | 1.313838806  | 0.374039003 | 0.001411957 | PALD1    | phosphatase domain containing, paladin 1 [Source:HGNC Symbol;Acc:23530]                             |
| 5883 | ENSG00000188610 | 40.39136548 | -1.492073196 | 0.424800226 | 0.001412568 | FAM72B   | family with sequence similarity 72, member B [Source:HGNC Symbol;Acc:24805]                         |
| 5884 | ENSG00000159461 | 902.0233917 | 0.43214497   | 0.123068778 | 0.001417658 | AMFR     | autocrine motility factor receptor, E3 ubiquitin protein ligase [Source:HGNC Symbol;Acc:463]        |
| 5885 | ENSG00000130529 | 517.7061546 | -0.523916694 | 0.149223091 | 0.001419807 | TRPM4    | transient receptor potential cation channel, subfamily M, member 4 [Source:HGNC Symbol;Acc:17993]   |
| 5886 | ENSG00000157954 | 2115.10641  | 0.294109085  | 0.083777414 | 0.001421497 | WIPI2    | WD repeat domain, phosphoinositide interacting 2 [Source:HGNC Symbol;Acc:32225]                     |
| 5887 | ENSG00000264644 | 13.92317438 | 1.957601539  | 0.558099071 | 0.001437018 | KRT18P8  | keratin 18 pseudogene 8 [Source:HGNC Symbol;Acc:31093]                                              |
| 5888 | ENSG00000125971 | 1409.564475 | -0.320342969 | 0.091327665 | 0.001437018 | DYNLRB1  | dynein, light chain, roadblock-type 1 [Source:HGNC Symbol;Acc:15468]                                |
| 5889 | ENSG00000156475 | 111.5659799 | 1.081783452  | 0.308619314 | 0.001449717 | PPP2R2B  | protein phosphatase 2, regulatory subunit B, beta [Source:HGNC Symbol;Acc:9305]                     |
| 5890 | ENSG00000265241 | 1387.70834  | 0.374000368  | 0.106704597 | 0.001450717 | RBM8A    | RNA-binding protein 8A [Source:UniProtKB/Swiss-Prot;Acc:Q9Y559]                                     |
| 5891 | ENSG00000154040 | 48.60343843 | -1.382081535 | 0.394406832 | 0.001454858 | CABYR    | calcium binding tyrosine-(Y)-phosphorylation regulated [Source:HGNC Symbol;Acc:15569]               |
| 5892 | ENSG00000087502 | 905.8151006 | -0.490665384 | 0.140034841 | 0.001456372 | ERGIC2   | ERGIC and golgi 2 [Source:HGNC Symbol;Acc:30208]                                                    |
| 5893 | ENSG00000120832 | 296.273814  | 0.665876742  | 0.190046597 | 0.001456812 | MTERFD3  | MTERF domain containing 3 [Source:HGNC Symbol;Acc:30779]                                            |
| 5894 | ENSG00000178690 | 89.74566955 | -1.10970171  | 0.316737452 | 0.001457752 | DYNAP    | dynactin associated protein [Source:HGNC Symbol;Acc:26808]                                          |
| 5895 | ENSG00000100012 | 39.89682036 | -1.543079876 | 0.440472184 | 0.001459136 | SEC14L3  | SEC14-like 3 (S. cerevisiae) [Source:HGNC Symbol;Acc:18655]                                         |
| 5896 | ENSG00000198890 | 117.3271814 | 0.996862213  | 0.284662666 | 0.001466207 | PRMT6    | protein arginine methyltransferase 6 [Source:HGNC Symbol;Acc:18241]                                 |
| 5897 | ENSG00000170832 | 2303.446001 | 0.283676021  | 0.081018362 | 0.001468865 | USP32    | ubiquitin specific peptidase 32 [Source:HGNC Symbol;Acc:19143]                                      |
| 5898 | ENSG00000085832 | 2636.281733 | -0.269874226 | 0.077077799 | 0.00146893  | EPS15    | epidermal growth factor receptor pathway substrate 15 [Source:HGNC Symbol;Acc:3419]                 |
| 5899 | ENSG00000088881 | 25.61659591 | 1.840082098  | 0.52560632  | 0.001471148 | EBF4     | early B-cell factor 4 [Source:HGNC Symbol;Acc:29278]                                                |
| 5900 | ENSG00000269743 | 131.4941678 | 0.943401912  | 0.269511913 | 0.001473473 | SLC25A53 |                                                                                                     |
| 5901 | ENSG00000168502 | 18.43232605 | -1.809002266 | 0.516859517 | 0.00147555  | SOGA2    | SOGA family member 2 [Source:HGNC Symbol;Acc:29121]                                                 |
| 5902 | ENSG00000065000 | 1619.510368 | 0.333040383  | 0.095165696 | 0.001477537 | AP3D1    | adaptor-related protein complex 3, delta 1 subunit [Source:HGNC Symbol;Acc:568]                     |

|      |                 |             |              |             |             |               |                                                                                                                                     |
|------|-----------------|-------------|--------------|-------------|-------------|---------------|-------------------------------------------------------------------------------------------------------------------------------------|
| 5903 | ENSG00000198466 | 1529.520014 | -0.385715758 | 0.110235062 | 0.001480364 | ZNF587        | zinc finger protein 587 [Source:HGNC Symbol;Acc:30955]                                                                              |
| 5904 | ENSG00000141404 | 504.0184407 | -0.498845397 | 0.142612861 | 0.001486402 | GNAL          | guanine nucleotide binding protein (G protein), alpha activating activity polypeptide, olfactory type [Source:HGNC Symbol;Acc:4388] |
| 5905 | ENSG00000108774 | 1796.229083 | 0.293826498  | 0.084007534 | 0.001487701 | RAB5C         | RAB5C, member RAS oncogene family [Source:HGNC Symbol;Acc:9785]                                                                     |
| 5906 | ENSG00000127415 | 118.5673088 | 1.074501952  | 0.307290768 | 0.001492623 | IDUA          | iduronidase, alpha-L- [Source:HGNC Symbol;Acc:5391]                                                                                 |
| 5907 | ENSG00000196591 | 1282.585393 | -0.375060596 | 0.10727328  | 0.001494526 | HDAC2         | histone deacetylase 2 [Source:HGNC Symbol;Acc:4853]                                                                                 |
| 5908 | ENSG00000233836 | 8.300242636 | 1.972750503  | 0.564311159 | 0.001496815 | RP11-255H23.2 |                                                                                                                                     |
| 5909 | ENSG00000106993 | 249.7759569 | 0.729359824  | 0.208663672 | 0.001499206 | CDC37L1       | cell division cycle 37-like 1 [Source:HGNC Symbol;Acc:17179]                                                                        |
| 5910 | ENSG00000119862 | 775.0515813 | 0.445744208  | 0.127618621 | 0.001513363 | LGALS1        | lectin, galactoside-binding-like [Source:HGNC Symbol;Acc:25012]                                                                     |
| 5911 | ENSG00000250654 | 28.29236007 | 1.678676314  | 0.480893366 | 0.001524965 | RP11-834C11.7 |                                                                                                                                     |
| 5912 | ENSG00000203872 | 125.9760931 | -0.951415908 | 0.272643946 | 0.001531307 | C6orf163      | chromosome 6 open reading frame 163 [Source:HGNC Symbol;Acc:21403]                                                                  |
| 5913 | ENSG00000082269 | 139.4388447 | 0.884843938  | 0.253587745 | 0.001532711 | FAM135A       | family with sequence similarity 135, member A [Source:HGNC Symbol;Acc:21084]                                                        |
| 5914 | ENSG00000112333 | 9.118916142 | -1.977128234 | 0.566640088 | 0.001532953 | NR2E1         | nuclear receptor subfamily 2, group E, member 1 [Source:HGNC Symbol;Acc:7973]                                                       |
| 5915 | ENSG00000183137 | 181.4428432 | -0.82453574  | 0.236331089 | 0.001534488 | CEP57L1       | centrosomal protein 57kDa-like 1 [Source:HGNC Symbol;Acc:21561]                                                                     |
| 5916 | ENSG00000198930 | 5.893052168 | 1.860748033  | 0.533550183 | 0.001542377 | CSAG1         | chondrosarcoma associated gene 1 [Source:HGNC Symbol;Acc:24294]                                                                     |
| 5917 | ENSG00000125733 | 59.01187765 | 1.345827501  | 0.386041525 | 0.001549398 | TRIP10        | thyroid hormone receptor interactor 10 [Source:HGNC Symbol;Acc:12304]                                                               |
| 5918 | ENSG00000065665 | 474.2257589 | 0.520186673  | 0.149329333 | 0.001565072 | SEC61A2       | Sec61 alpha 2 subunit (S. cerevisiae) [Source:HGNC Symbol;Acc:17702]                                                                |
| 5919 | ENSG00000204920 | 217.8520989 | 0.812786663  | 0.233516107 | 0.001581473 | ZNF155        | zinc finger protein 155 [Source:HGNC Symbol;Acc:12940]                                                                              |
| 5920 | ENSG00000178081 | 57.56257906 | -1.384273249 | 0.397710619 | 0.001581473 | ULK4P3        | ULK4 pseudogene 3 [Source:HGNC Symbol;Acc:15777]                                                                                    |
| 5921 | ENSG00000260222 | 20.7715658  | 1.825820956  | 0.524614163 | 0.001582931 | TRBV3-1       | T cell receptor beta variable 3-1 [Source:HGNC Symbol;Acc:12212]                                                                    |
| 5922 | ENSG00000216937 | 129.5645423 | -0.911952429 | 0.262062098 | 0.001585043 | CCDC7         | coiled-coil domain containing 7 [Source:HGNC Symbol;Acc:26533]                                                                      |
| 5923 | ENSG00000163714 | 2979.869282 | -0.311906544 | 0.089643385 | 0.001587703 | U2SURP        | U2 snRNP-associated SURP domain containing [Source:HGNC Symbol;Acc:30855]                                                           |
| 5924 | ENSG00000100280 | 1354.535484 | 0.400207121  | 0.11507487  | 0.001597009 | AP1B1         | adaptor-related protein complex 1, beta 1 subunit [Source:HGNC Symbol;Acc:554]                                                      |
| 5925 | ENSG00000166783 | 4918.252367 | 0.205800484  | 0.059176189 | 0.001597009 | KIAA0430      | KIAA0430 [Source:HGNC Symbol;Acc:29562]                                                                                             |
| 5926 | ENSG00000262448 | 644.9482059 | 0.683680703  | 0.196602208 | 0.001598384 | MARCH8        | membrane-associated ring finger (C3HC4) 8, E3 ubiquitin protein ligase [Source:HGNC Symbol;Acc:23356]                               |
| 5927 | ENSG00000023287 | 1687.290372 | 0.314691617  | 0.090563035 | 0.001613968 | RB1CC1        | RB1-inducible coiled-coil 1 [Source:HGNC Symbol;Acc:15574]                                                                          |
| 5928 | ENSG00000117643 | 223.8793778 | 0.818629673  | 0.235772528 | 0.001630127 | MAN1C1        | mannosidase, alpha, class 1C, member 1 [Source:HGNC Symbol;Acc:19080]                                                               |
| 5929 | ENSG00000138028 | 36.92654722 | -1.494591408 | 0.430518176 | 0.001632926 | CGREF1        | cell growth regulator with EF-hand domain 1 [Source:HGNC Symbol;Acc:16962]                                                          |
| 5930 | ENSG00000102886 | 729.144564  | -0.414642791 | 0.119443547 | 0.001633602 | GDPD3         | glycerophosphodiester phosphodiesterase domain containing 3 [Source:HGNC Symbol;Acc:28638]                                          |

|      |                 |             |              |             |             |               |                                                                                                                      |
|------|-----------------|-------------|--------------|-------------|-------------|---------------|----------------------------------------------------------------------------------------------------------------------|
| 5931 | ENSG00000008300 | 85.88066321 | 1.12044915   | 0.322790955 | 0.001635304 | CELSR3        | cadherin, EGF LAG seven-pass G-type receptor 3 [Source:HGNC Symbol;Acc:3230]                                         |
| 5932 | ENSG00000133704 | 1660.166663 | -0.358354949 | 0.103245064 | 0.001636327 | IPO8          | importin 8 [Source:HGNC Symbol;Acc:9853]                                                                             |
| 5933 | ENSG00000206480 | 205.8347209 | -0.745551133 | 0.21480892  | 0.001636976 | FLOT1         | flotillin 1 [Source:HGNC Symbol;Acc:3757]                                                                            |
| 5934 | ENSG00000206379 | 205.8339374 | -0.745477312 | 0.214810103 | 0.001638913 | FLOT1         | flotillin 1 [Source:HGNC Symbol;Acc:3757]                                                                            |
| 5935 | ENSG00000232372 | 86.95582552 | -1.086715039 | 0.313191616 | 0.001642256 | RP11-504P24.2 |                                                                                                                      |
| 5936 | ENSG00000237702 | 20.47251214 | 1.823121428  | 0.525689158 | 0.001652704 | TRBV3-1       | T cell receptor beta variable 3-1 [Source:HGNC Symbol;Acc:12212]                                                     |
| 5937 | ENSG00000260915 | 16.32199715 | 1.937487979  | 0.558748871 | 0.001655582 | TRBV14        | T cell receptor beta variable 14 [Source:HGNC Symbol;Acc:12189]                                                      |
| 5938 | ENSG00000127184 | 2129.799297 | 0.295883673  | 0.085398662 | 0.001672711 | COX7C         | cytochrome c oxidase subunit VIIc [Source:HGNC Symbol;Acc:2292]                                                      |
| 5939 | ENSG00000160226 | 308.7237283 | 0.687559372  | 0.198574033 | 0.001686479 | C21orf2       | chromosome 21 open reading frame 2 [Source:HGNC Symbol;Acc:1260]                                                     |
| 5940 | ENSG00000116830 | 480.822909  | -0.669978839 | 0.193541693 | 0.001691257 | TTF2          | transcription termination factor, RNA polymerase II [Source:HGNC Symbol;Acc:12398]                                   |
| 5941 | ENSG00000198205 | 75.76475962 | 1.200528496  | 0.346860758 | 0.001694443 | ZXDA          | zinc finger, X-linked, duplicated A [Source:HGNC Symbol;Acc:13198]                                                   |
| 5942 | ENSG00000100030 | 7375.256353 | -0.218049898 | 0.063008439 | 0.001697176 | MAPK1         | mitogen-activated protein kinase 1 [Source:HGNC Symbol;Acc:6871]                                                     |
| 5943 | ENSG00000111530 | 1392.891436 | 0.332916756  | 0.096208058 | 0.001698547 | CAND1         | cullin-associated and neddylation-dissociated 1 [Source:HGNC Symbol;Acc:30688]                                       |
| 5944 | ENSG00000238134 | 199.2012183 | 0.793014303  | 0.229214335 | 0.001702535 | EHMT2         | euchromatic histone-lysine N-methyltransferase 2 [Source:HGNC Symbol;Acc:14129]                                      |
| 5945 | ENSG00000135446 | 775.6519775 | -0.419155342 | 0.121159046 | 0.001703261 | CDK4          | cyclin-dependent kinase 4 [Source:HGNC Symbol;Acc:1773]                                                              |
| 5946 | ENSG00000232045 | 199.2026441 | 0.79301773   | 0.229248822 | 0.00170516  | EHMT2         | euchromatic histone-lysine N-methyltransferase 2 [Source:HGNC Symbol;Acc:14129]                                      |
| 5947 | ENSG00000198721 | 432.4315583 | 0.537782674  | 0.155488295 | 0.001708238 | ECI2          | enoyl-CoA delta isomerase 2 [Source:HGNC Symbol;Acc:14601]                                                           |
| 5948 | ENSG00000186891 | 13.07971584 | 1.932062354  | 0.558931058 | 0.001720423 | TNFRSF18      | tumor necrosis factor receptor superfamily, member 18 [Source:HGNC Symbol;Acc:11914]                                 |
| 5949 | ENSG00000087269 | 576.1880888 | 0.472923961  | 0.136885348 | 0.001731777 | NOP14         | NOP14 nucleolar protein [Source:HGNC Symbol;Acc:16821]                                                               |
| 5950 | ENSG00000067646 | 295.0368402 | 0.638689243  | 0.184883998 | 0.001733739 | ZFY           | zinc finger protein, Y-linked [Source:HGNC Symbol;Acc:12870]                                                         |
| 5951 | ENSG00000071073 | 2424.68763  | 0.311689321  | 0.090252332 | 0.001739941 | MGAT4A        | mannosyl (alpha-1,3-)-glycoprotein beta-1,4-N-acetylglucosaminyltransferase, isozyme A [Source:HGNC Symbol;Acc:7047] |
| 5952 | ENSG00000103253 | 41.32999307 | 1.489751904  | 0.431544219 | 0.001748637 | HAGHL         | hydroxyacylglutathione hydrolase-like [Source:HGNC Symbol;Acc:14177]                                                 |
| 5953 | ENSG00000100647 | 4835.416568 | -0.206279756 | 0.059762908 | 0.001751466 | KIAA0247      | KIAA0247 [Source:HGNC Symbol;Acc:19956]                                                                              |
| 5954 | ENSG00000160991 | 3938.023489 | -0.283446424 | 0.08211994  | 0.001751466 | ORAI2         | ORAI calcium release-activated calcium modulator 2 [Source:HGNC Symbol;Acc:21667]                                    |
| 5955 | ENSG00000232022 | 39.97559261 | 1.495740937  | 0.433377747 | 0.001752853 | RP5-1109J22.1 |                                                                                                                      |
| 5956 | ENSG00000144959 | 122.5295895 | -1.022030445 | 0.296235593 | 0.001760998 | NCEH1         | neutral cholesterol ester hydrolase 1 [Source:HGNC Symbol;Acc:29260]                                                 |
| 5957 | ENSG00000135074 | 3508.690127 | -0.241639012 | 0.070051151 | 0.001764582 | ADAM19        | ADAM metalloproteinase domain 19 [Source:HGNC Symbol;Acc:197]                                                        |
| 5958 | ENSG00000081692 | 122.2489038 | 0.962409065  | 0.279010789 | 0.001764964 | JMJD4         | jumonji domain containing 4 [Source:HGNC Symbol;Acc:25724]                                                           |

|      |                 |             |              |             |             |               |                                                                                                      |
|------|-----------------|-------------|--------------|-------------|-------------|---------------|------------------------------------------------------------------------------------------------------|
| 5959 | ENSG00000134200 | 29.27046157 | -1.620437125 | 0.469798939 | 0.001765632 | TSHB          | thyroid stimulating hormone, beta [Source:HGNC Symbol;Acc:12372]                                     |
| 5960 | ENSG00000077684 | 1539.192523 | 0.327215681  | 0.094886092 | 0.001769941 | JADE1         | jade family PHD finger 1 [Source:HGNC Symbol;Acc:30027]                                              |
| 5961 | ENSG00000120051 | 68.23987245 | -1.190400115 | 0.345321457 | 0.001778099 | CCDC147       | coiled-coil domain containing 147 [Source:HGNC Symbol;Acc:26676]                                     |
| 5962 | ENSG00000269981 | 13.40849329 | -1.947500234 | 0.565060259 | 0.001782331 | RP11-34P13.16 |                                                                                                      |
| 5963 | ENSG00000152242 | 1331.980346 | -0.350511422 | 0.101712017 | 0.0017848   | C18orf25      | chromosome 18 open reading frame 25 [Source:HGNC Symbol;Acc:28172]                                   |
| 5964 | ENSG00000137460 | 221.7179666 | -0.715999458 | 0.207787038 | 0.001786371 | FHDC1         | FH2 domain containing 1 [Source:HGNC Symbol;Acc:29363]                                               |
| 5965 | ENSG00000162769 | 1096.072961 | -0.375683212 | 0.109026924 | 0.001786397 | FLVCR1        | feline leukemia virus subgroup C cellular receptor 1 [Source:HGNC Symbol;Acc:24682]                  |
| 5966 | ENSG00000158417 | 1566.598098 | 0.304608479  | 0.088403538 | 0.00178692  | EIF5B         | eukaryotic translation initiation factor 5B [Source:HGNC Symbol;Acc:30793]                           |
| 5967 | ENSG00000146530 | 19.40806071 | -1.818303548 | 0.52775102  | 0.001788459 | VWDE          | von Willebrand factor D and EGF domains [Source:HGNC Symbol;Acc:21897]                               |
| 5968 | ENSG00000229176 | 28.00670581 | -1.846597377 | 0.535980984 | 0.001788919 | SAPCD1        | suppressor APC domain containing 1 [Source:HGNC Symbol;Acc:13938]                                    |
| 5969 | ENSG00000075142 | 988.3490431 | -0.357797145 | 0.103883393 | 0.001795565 | SRI           | sorcini [Source:HGNC Symbol;Acc:11292]                                                               |
| 5970 | ENSG00000067798 | 138.6070192 | -0.880832256 | 0.2557655   | 0.001797346 | NAV3          | neuron navigator 3 [Source:HGNC Symbol;Acc:15998]                                                    |
| 5971 | ENSG00000272886 | 739.2873735 | 0.460943496  | 0.133856676 | 0.001799343 | AC112218.1    | cDNA FLJ53884, highly similar to mRNA decapping enzyme 1A [Source:UniProtKB/TrEMBL;Acc:B4DHN9]       |
| 5972 | ENSG00000114062 | 894.0087649 | 0.383462475  | 0.11141367  | 0.001810853 | UBE3A         | ubiquitin protein ligase E3A [Source:HGNC Symbol;Acc:12496]                                          |
| 5973 | ENSG00000213337 | 148.8846382 | 0.85884682   | 0.24957695  | 0.001814433 | ANKRD39       | ankyrin repeat domain 39 [Source:HGNC Symbol;Acc:28640]                                              |
| 5974 | ENSG00000149534 | 56.66540948 | -1.279815456 | 0.371938784 | 0.001816009 | MS4A2         | membrane-spanning 4-domains, subfamily A, member 2 [Source:HGNC Symbol;Acc:7316]                     |
| 5975 | ENSG00000164849 | 26.67123492 | 1.692954595  | 0.492124222 | 0.001821311 | GPR146        | G protein-coupled receptor 146 [Source:HGNC Symbol;Acc:21718]                                        |
| 5976 | ENSG00000178878 | 189.9348601 | 0.875103606  | 0.254408616 | 0.001823295 | APOLD1        | apolipoprotein L domain containing 1 [Source:HGNC Symbol;Acc:25268]                                  |
| 5977 | ENSG00000213639 | 3363.19795  | 0.238679225  | 0.069413905 | 0.001831516 | PPP1CB        | protein phosphatase 1, catalytic subunit, beta isozyme [Source:HGNC Symbol;Acc:9282]                 |
| 5978 | ENSG00000214517 | 442.7270209 | -0.524281178 | 0.15251485  | 0.001837431 | PPME1         | protein phosphatase methylesterase 1 [Source:HGNC Symbol;Acc:30178]                                  |
| 5979 | ENSG00000258405 | 38.35331969 | 1.485978699  | 0.432384467 | 0.001843019 | ZNF578        | zinc finger protein 578 [Source:HGNC Symbol;Acc:26449]                                               |
| 5980 | ENSG00000175003 | 135.7438148 | 0.956783959  | 0.278498385 | 0.00185087  | SLC22A1       | solute carrier family 22 (organic cation transporter), member 1 [Source:HGNC Symbol;Acc:10963]       |
| 5981 | ENSG00000124602 | 122.0222978 | 1.068891656  | 0.311148406 | 0.001851917 | UNC5CL        | unc-5 homolog C (C. elegans)-like [Source:HGNC Symbol;Acc:21203]                                     |
| 5982 | ENSG00000178222 | 34.66277373 | 1.555402445  | 0.453163342 | 0.001872071 | RNF212        | ring finger protein 212 [Source:HGNC Symbol;Acc:27729]                                               |
| 5983 | ENSG00000125447 | 2767.624921 | -0.277044598 | 0.080718174 | 0.001872071 | GGA3          | golgi-associated, gamma adaptin ear containing, ARF binding protein 3 [Source:HGNC Symbol;Acc:17079] |
| 5984 | ENSG00000152520 | 3405.983052 | 0.26006766   | 0.075771963 | 0.001872071 | PAN3          | PAN3 poly(A) specific ribonuclease subunit homolog (S. cerevisiae) [Source:HGNC Symbol;Acc:29991]    |
| 5985 | ENSG00000034693 | 161.8240828 | 0.831929527  | 0.242479178 | 0.001880817 | PEX3          | peroxisomal biogenesis factor 3 [Source:HGNC Symbol;Acc:8858]                                        |
| 5986 | ENSG00000144354 | 356.4846304 | -0.567275394 | 0.16538198  | 0.001886334 | CDCA7         | cell division cycle associated 7 [Source:HGNC Symbol;Acc:14628]                                      |

|      |                 |             |              |             |             |               |                                                                                                |
|------|-----------------|-------------|--------------|-------------|-------------|---------------|------------------------------------------------------------------------------------------------|
| 5987 | ENSG00000185862 | 16601.82833 | 0.181151544  | 0.05281604  | 0.001887642 | EVI2B         | ecotropic viral integration site 2B [Source:HGNC Symbol;Acc:3500]                              |
| 5988 | ENSG00000164951 | 514.172919  | 0.504962693  | 0.147294347 | 0.001898505 | PDP1          | pyruvate dehydrogenase phosphatase catalytic subunit 1 [Source:HGNC Symbol;Acc:9279]           |
| 5989 | ENSG00000156253 | 151.2176752 | 0.852724289  | 0.24877298  | 0.001901933 | RWDD2B        | RWD domain containing 2B [Source:HGNC Symbol;Acc:1302]                                         |
| 5990 | ENSG00000155393 | 491.1041248 | 0.603898065  | 0.176232423 | 0.00190868  | HEATR3        | HEAT repeat containing 3 [Source:HGNC Symbol;Acc:26087]                                        |
| 5991 | ENSG00000124228 | 1147.203448 | 0.339060525  | 0.098957527 | 0.001911104 | DDX27         | DEAD (Asp-Glu-Ala-Asp) box polypeptide 27 [Source:HGNC Symbol;Acc:15837]                       |
| 5992 | ENSG00000110013 | 254.7724702 | 0.664785426  | 0.194025659 | 0.001911122 | SIAE          | sialic acid acetyltransferase [Source:HGNC Symbol;Acc:18187]                                   |
| 5993 | ENSG00000168944 | 854.7147846 | 0.417157444  | 0.121790447 | 0.00191834  | CEP120        | centrosomal protein 120kDa [Source:HGNC Symbol;Acc:26690]                                      |
| 5994 | ENSG00000167840 | 102.2373436 | 1.014148895  | 0.296201498 | 0.001927634 | ZNF232        | zinc finger protein 232 [Source:HGNC Symbol;Acc:13026]                                         |
| 5995 | ENSG00000123384 | 971.8889807 | 0.459963693  | 0.134373448 | 0.001933156 | LRP1          | low density lipoprotein receptor-related protein 1 [Source:HGNC Symbol;Acc:6692]               |
| 5996 | ENSG00000206047 | 118258.4309 | -1.494278482 | 0.436606964 | 0.001936716 | DEFA1         | defensin, alpha 1 [Source:HGNC Symbol;Acc:2761]                                                |
| 5997 | ENSG00000172766 | 1013.770667 | -0.387451928 | 0.113225945 | 0.00194027  | NAA16         | N(alpha)-acetyltransferase 16, NatA auxiliary subunit [Source:HGNC Symbol;Acc:26164]           |
| 5998 | ENSG00000145907 | 2547.83093  | 0.258413155  | 0.075529054 | 0.001943958 | G3BP1         | GTPase activating protein (SH3 domain) binding protein 1 [Source:HGNC Symbol;Acc:30292]        |
| 5999 | ENSG00000153395 | 3464.149622 | -0.227285887 | 0.066439365 | 0.001946653 | LPCAT1        | lysophosphatidylcholine acyltransferase 1 [Source:HGNC Symbol;Acc:25718]                       |
| 6000 | ENSG00000185163 | 399.07373   | 0.595793057  | 0.174172658 | 0.001948107 | DDX51         | DEAD (Asp-Glu-Ala-Asp) box polypeptide 51 [Source:HGNC Symbol;Acc:20082]                       |
| 6001 | ENSG00000242193 | 117.3899501 | -0.961767861 | 0.281214794 | 0.001952489 | RP11-568K15.1 |                                                                                                |
| 6002 | ENSG00000272333 | 1851.982095 | 0.362316397  | 0.105969411 | 0.001959218 | KMT2B         | Histone-lysine N-methyltransferase 2B [Source:UniProtKB/Swiss-Prot;Acc:Q9UMN6]                 |
| 6003 | ENSG00000143919 | 115.2210057 | -0.979746351 | 0.286581151 | 0.001961241 | CAMKMT        | calmodulin-lysine N-methyltransferase [Source:HGNC Symbol;Acc:26276]                           |
| 6004 | ENSG00000085871 | 306.2077111 | -0.605594339 | 0.177274969 | 0.001979804 | MGST2         | microsomal glutathione S-transferase 2 [Source:HGNC Symbol;Acc:7063]                           |
| 6005 | ENSG00000140400 | 2407.305648 | -0.26026805  | 0.076204854 | 0.00198498  | MAN2C1        | mannosidase, alpha, class 2C, member 1 [Source:HGNC Symbol;Acc:6827]                           |
| 6006 | ENSG00000204177 | 174.8097617 | 0.84277088   | 0.246814249 | 0.001990325 | BMS1P1        | BMS1 pseudogene 1 [Source:HGNC Symbol;Acc:23649]                                               |
| 6007 | ENSG00000007202 | 3739.822489 | -0.22474559  | 0.065824674 | 0.00199211  | KIAA0100      | KIAA0100 [Source:HGNC Symbol;Acc:28960]                                                        |
| 6008 | ENSG00000125877 | 309.4679257 | 0.638768578  | 0.18712541  | 0.001997054 | ITPA          | inosine triphosphatase (nucleoside triphosphate pyrophosphatase) [Source:HGNC Symbol;Acc:6176] |
| 6009 | ENSG00000149428 | 1050.064537 | 0.363533066  | 0.10650249  | 0.001998256 | HYOU1         | hypoxia up-regulated 1 [Source:HGNC Symbol;Acc:16931]                                          |
| 6010 | ENSG00000070366 | 843.9608587 | -0.556394907 | 0.163052802 | 0.002005385 | SMG6          | SMG6 nonsense mediated mRNA decay factor [Source:HGNC Symbol;Acc:17809]                        |
| 6011 | ENSG00000123096 | 12.97773824 | 1.915029113  | 0.561401561 | 0.002013918 | SSPN          | sarcospan [Source:HGNC Symbol;Acc:11322]                                                       |
| 6012 | ENSG00000261887 | 132.9752774 | -0.912298166 | 0.267452154 | 0.002014225 | C5orf30       | chromosome 5 open reading frame 30 [Source:HGNC Symbol;Acc:25052]                              |
| 6013 | ENSG00000062598 | 1886.777852 | -0.285366975 | 0.08370092  | 0.002026525 | ELMO2         | engulfment and cell motility 2 [Source:HGNC Symbol;Acc:17233]                                  |
| 6014 | ENSG00000132600 | 409.3338716 | 0.582741819  | 0.170950714 | 0.002030169 | PRMT7         | protein arginine methyltransferase 7 [Source:HGNC Symbol;Acc:25557]                            |

|      |                 |             |              |             |             |            |                                                                                                                             |
|------|-----------------|-------------|--------------|-------------|-------------|------------|-----------------------------------------------------------------------------------------------------------------------------|
| 6015 | ENSG00000138073 | 1114.072123 | -0.399046143 | 0.117083885 | 0.002034466 | PREB       | prolactin regulatory element binding [Source:HGNC Symbol;Acc:9356]                                                          |
| 6016 | ENSG00000105875 | 732.01306   | 0.508402672  | 0.149214746 | 0.00204174  | WDR91      | WD repeat domain 91 [Source:HGNC Symbol;Acc:24997]                                                                          |
| 6017 | ENSG00000271885 | 132.6554733 | 1.037467407  | 0.304531135 | 0.002044532 | SRSF8      | Homo sapiens serine/arginine-rich splicing factor 8 (SRSF8), transcript variant 1, mRNA. [Source:RefSeq mRNA;Acc:NM_032102] |
| 6018 | ENSG00000163938 | 734.837955  | 0.417028408  | 0.122459892 | 0.002054258 | GNL3       | guanine nucleotide binding protein-like 3 (nucleolar) [Source:HGNC Symbol;Acc:29931]                                        |
| 6019 | ENSG00000161692 | 287.2595372 | -0.647120734 | 0.190051489 | 0.002057324 | DBF4B      | DBF4 homolog B ( <i>S. cerevisiae</i> ) [Source:HGNC Symbol;Acc:17883]                                                      |
| 6020 | ENSG00000129195 | 29.8286283  | -1.650008693 | 0.484636962 | 0.002059603 | FAM64A     | family with sequence similarity 64, member A [Source:HGNC Symbol;Acc:25483]                                                 |
| 6021 | ENSG00000173674 | 953.4060235 | 0.36047695   | 0.105892144 | 0.002062569 | EIF1AX     | eukaryotic translation initiation factor 1A, X-linked [Source:HGNC Symbol;Acc:3250]                                         |
| 6022 | ENSG00000266592 | 53.5731662  | -1.445144132 | 0.424636153 | 0.002069142 | AKR1C1     | aldo-keto reductase family 1, member C1 [Source:HGNC Symbol;Acc:384]                                                        |
| 6023 | ENSG00000187134 | 53.57284662 | -1.445124594 | 0.424637872 | 0.002069142 | AKR1C1     | aldo-keto reductase family 1, member C1 [Source:HGNC Symbol;Acc:384]                                                        |
| 6024 | ENSG00000047932 | 1027.686647 | 0.374959338  | 0.11017896  | 0.002069142 | GOPC       | golgi-associated PDZ and coiled-coil motif containing [Source:HGNC Symbol;Acc:17643]                                        |
| 6025 | ENSG00000233948 | 1092.535074 | 0.348222755  | 0.102345085 | 0.002074462 | TRIM27     | tripartite motif containing 27 [Source:HGNC Symbol;Acc:9975]                                                                |
| 6026 | ENSG00000002919 | 1705.739416 | -0.319211859 | 0.093859238 | 0.002085333 | SNX11      | sorting nexin 11 [Source:HGNC Symbol;Acc:14975]                                                                             |
| 6027 | ENSG00000214367 | 698.2034715 | 0.438533089  | 0.128975116 | 0.0020913   | HAUS3      | HAUS augmin-like complex, subunit 3 [Source:HGNC Symbol;Acc:28719]                                                          |
| 6028 | ENSG00000136830 | 209.5631592 | -0.794618718 | 0.233767465 | 0.002098251 | FAM129B    | family with sequence similarity 129, member B [Source:HGNC Symbol;Acc:25282]                                                |
| 6029 | ENSG00000119541 | 1881.957865 | 0.28132158   | 0.08276624  | 0.002099398 | VPS4B      | vacuolar protein sorting 4 homolog B ( <i>S. cerevisiae</i> ) [Source:HGNC Symbol;Acc:10895]                                |
| 6030 | ENSG00000170340 | 1148.714431 | -0.340707294 | 0.100243366 | 0.002100494 | B3GNT2     | UDP-GlcNAc:betaGal beta-1,3-N-acetylglucosaminyltransferase 2 [Source:HGNC Symbol;Acc:15629]                                |
| 6031 | ENSG00000166002 | 123.6666515 | 0.967473771  | 0.284691633 | 0.002103832 | SMCO4      | single-pass membrane protein with coiled-coil domains 4 [Source:HGNC Symbol;Acc:24810]                                      |
| 6032 | ENSG00000169439 | 30.96246964 | 1.748246583  | 0.514495927 | 0.002106117 | SDC2       | syndecan 2 [Source:HGNC Symbol;Acc:10659]                                                                                   |
| 6033 | ENSG00000137312 | 220.807759  | -0.701176538 | 0.20640002  | 0.002111728 | FLOT1      | flotillin 1 [Source:HGNC Symbol;Acc:3757]                                                                                   |
| 6034 | ENSG00000122026 | 1051.758698 | 0.40051552   | 0.117898132 | 0.002111728 | RPL21      | ribosomal protein L21 [Source:HGNC Symbol;Acc:10313]                                                                        |
| 6035 | ENSG00000174482 | 14.96217216 | 1.890134128  | 0.556393853 | 0.002111728 | LINGO2     | leucine rich repeat and Ig domain containing 2 [Source:HGNC Symbol;Acc:21207]                                               |
| 6036 | ENSG00000178896 | 61.89564881 | -1.207260502 | 0.355434073 | 0.002115508 | EXOSC4     | exosome component 4 [Source:HGNC Symbol;Acc:18189]                                                                          |
| 6037 | ENSG00000087263 | 465.3315763 | 0.49811694   | 0.146679304 | 0.002119965 | OGFOD1     | 2-oxoglutarate and iron-dependent oxygenase domain containing 1 [Source:HGNC Symbol;Acc:25585]                              |
| 6038 | ENSG00000147155 | 305.8088709 | -0.598735453 | 0.176378369 | 0.002130101 | EBP        | emopamil binding protein (sterol isomerase) [Source:HGNC Symbol;Acc:3133]                                                   |
| 6039 | ENSG00000124198 | 946.3305846 | 0.400420129  | 0.117986529 | 0.002136212 | ARFGEF2    | ADP-ribosylation factor guanine nucleotide-exchange factor 2 (brefeldin A-inhibited) [Source:HGNC Symbol;Acc:15853]         |
| 6040 | ENSG00000184402 | 621.5368089 | -0.435221309 | 0.1282443   | 0.002136553 | SS18L1     | synovial sarcoma translocation gene on chromosome 18-like 1 [Source:HGNC Symbol;Acc:15592]                                  |
| 6041 | ENSG00000175911 | 44.13201964 | -1.398944427 | 0.412300723 | 0.002141299 | AC127496.1 | Uncharacterized protein [Source:UniProtKB/TrEMBL;Acc:Q9HBN7]                                                                |
| 6042 | ENSG00000183748 | 58.01311632 | 1.274903729  | 0.375746298 | 0.002141299 | MRC1L1     | cDNA FLJ56855, highly similar to Macrophage mannose receptor 1 [Source:UniProtKB/TrEMBL;Acc:B4DLK9]                         |

|      |                 |             |              |             |             |              |                                                                                                    |
|------|-----------------|-------------|--------------|-------------|-------------|--------------|----------------------------------------------------------------------------------------------------|
| 6043 | ENSG00000268394 | 305.9545614 | -0.598876947 | 0.176566879 | 0.002150386 | EBP          | emopamil binding protein (sterol isomerase) [Source:HGNC Symbol;Acc:3133]                          |
| 6044 | ENSG00000213420 | 79.94488131 | 1.190968213  | 0.351173412 | 0.002153084 | GPC2         | glypican 2 [Source:HGNC Symbol;Acc:4450]                                                           |
| 6045 | ENSG00000167842 | 428.1017213 | 0.548032     | 0.161668734 | 0.00216485  | MIS12        | MIS12 kinetochore complex component [Source:HGNC Symbol;Acc:24967]                                 |
| 6046 | ENSG00000174775 | 107.3141032 | 1.033119866  | 0.304772034 | 0.00216485  | HRAS         | Harvey rat sarcoma viral oncogene homolog [Source:HGNC Symbol;Acc:5173]                            |
| 6047 | ENSG00000070047 | 510.9196048 | 0.574439284  | 0.169467646 | 0.002165416 | PHRF1        | PHD and ring finger domains 1 [Source:HGNC Symbol;Acc:24351]                                       |
| 6048 | ENSG00000179476 | 107.9169691 | 1.021728333  | 0.301425946 | 0.002165416 | C14orf28     | chromosome 14 open reading frame 28 [Source:HGNC Symbol;Acc:19834]                                 |
| 6049 | ENSG00000116406 | 2540.392404 | -0.289518304 | 0.08543738  | 0.002172879 | EDEM3        | ER degradation enhancer, mannosidase alpha-like 3 [Source:HGNC Symbol;Acc:16787]                   |
| 6050 | ENSG00000271254 | 111.2582858 | 1.049474698  | 0.309727202 | 0.002174714 | NBPF10       | Putative neuroblastoma breakpoint family member 8 [Source:UniProtKB/TrEMBL;Acc:H7BY69]             |
| 6051 | ENSG00000272636 | 22.1950079  | -1.70120347  | 0.502103831 | 0.002176205 | DOC2B        | double C2-like domains, beta [Source:HGNC Symbol;Acc:2986]                                         |
| 6052 | ENSG00000123119 | 65.7714294  | -1.180547895 | 0.348447534 | 0.002176867 | NECAB1       | N-terminal EF-hand calcium binding protein 1 [Source:HGNC Symbol;Acc:20983]                        |
| 6053 | ENSG00000268429 | 22.19425634 | -1.701063847 | 0.502106336 | 0.002177827 | DOC2B        | double C2-like domains, beta [Source:HGNC Symbol;Acc:2986]                                         |
| 6054 | ENSG00000114738 | 2862.987805 | -0.238181485 | 0.070305436 | 0.002177827 | MAPKAPK3     | mitogen-activated protein kinase-activated protein kinase 3 [Source:HGNC Symbol;Acc:6888]          |
| 6055 | ENSG00000272670 | 22.19382409 | -1.700981791 | 0.502107853 | 0.002178486 | DOC2B        | double C2-like domains, beta [Source:HGNC Symbol;Acc:2986]                                         |
| 6056 | ENSG00000026559 | 33.28831023 | 1.543187164  | 0.455556897 | 0.002179779 | KCNG1        | potassium voltage-gated channel, subfamily G, member 1 [Source:HGNC Symbol;Acc:6248]               |
| 6057 | ENSG00000132603 | 350.2127865 | 0.64070015   | 0.189185759 | 0.00218622  | NIP7         | NIP7, nucleolar pre-rRNA processing protein [Source:HGNC Symbol;Acc:24328]                         |
| 6058 | ENSG00000213648 | 1179.256105 | -0.50932177  | 0.150445181 | 0.002195345 | SULT1A4      | sulfotransferase family, cytosolic, 1A, phenol-preferring, member 4 [Source:HGNC Symbol;Acc:30004] |
| 6059 | ENSG00000188596 | 247.9306591 | -0.686898069 | 0.202981743 | 0.002206144 | C12orf55     | chromosome 12 open reading frame 55 [Source:HGNC Symbol;Acc:26456]                                 |
| 6060 | ENSG00000139146 | 836.7265969 | 0.459250148  | 0.135758412 | 0.00221536  | FAM60A       | family with sequence similarity 60, member A [Source:HGNC Symbol;Acc:30702]                        |
| 6061 | ENSG00000101363 | 362.3845868 | 0.576732979  | 0.170542868 | 0.002223888 | MANBAL       | mannosidase, beta A, lysosomal-like [Source:HGNC Symbol;Acc:15799]                                 |
| 6062 | ENSG00000110888 | 1007.374719 | -0.364013177 | 0.107651589 | 0.002226331 | CAPRN2       | caprin family member 2 [Source:HGNC Symbol;Acc:21259]                                              |
| 6063 | ENSG00000165516 | 749.1628682 | 0.46739324   | 0.138233547 | 0.002227711 | KLHDC2       | kelch domain containing 2 [Source:HGNC Symbol;Acc:20231]                                           |
| 6064 | ENSG00000106723 | 817.7729933 | 0.41927096   | 0.124032968 | 0.00223438  | SPIN1        | spindlin 1 [Source:HGNC Symbol;Acc:11243]                                                          |
| 6065 | ENSG00000173281 | 1745.857572 | 0.301058631  | 0.089066948 | 0.002235475 | PPP1R3B      | protein phosphatase 1, regulatory subunit 3B [Source:HGNC Symbol;Acc:14942]                        |
| 6066 | ENSG00000112282 | 1499.504226 | -0.308821349 | 0.091375436 | 0.002238581 | MED23        | mediator complex subunit 23 [Source:HGNC Symbol;Acc:2372]                                          |
| 6067 | ENSG00000143740 | 223.0783317 | 0.733663283  | 0.217081567 | 0.002238581 | SNAP47       | synaptosomal-associated protein, 47kDa [Source:HGNC Symbol;Acc:30669]                              |
| 6068 | ENSG00000127884 | 475.3374376 | 0.490595688  | 0.145225385 | 0.002250448 | ECHS1        | enoyl CoA hydratase, short chain, 1, mitochondrial [Source:HGNC Symbol;Acc:3151]                   |
| 6069 | ENSG00000187695 | 62.02310963 | 1.257520733  | 0.372273673 | 0.002251883 | RP11-723O4.6 | Uncharacterized protein FLJ43738 [Source:UniProtKB/Swiss-Prot;Acc:Q6ZUG5]                          |
| 6070 | ENSG00000241945 | 409.6282416 | 0.568340552  | 0.16825277  | 0.00225192  | PWP2         | PWP2 periodic tryptophan protein homolog (yeast) [Source:HGNC Symbol;Acc:9711]                     |

|      |                 |             |              |             |             |               |                                                                                                        |
|------|-----------------|-------------|--------------|-------------|-------------|---------------|--------------------------------------------------------------------------------------------------------|
| 6071 | ENSG00000196532 | 6.48585724  | -1.843854551 | 0.546002631 | 0.00225885  | HIST1H3C      | histone cluster 1, H3c [Source:HGNC Symbol;Acc:4768]                                                   |
| 6072 | ENSG00000101336 | 10117.18524 | -0.166651025 | 0.049352811 | 0.002260767 | HCK           | hemopoietic cell kinase [Source:HGNC Symbol;Acc:4840]                                                  |
| 6073 | ENSG00000143153 | 47.20685211 | 1.352799704  | 0.400648627 | 0.002262073 | ATP1B1        | ATPase, Na <sup>+</sup> /K <sup>+</sup> transporting, beta 1 polypeptide [Source:HGNC Symbol;Acc:804]  |
| 6074 | ENSG00000143614 | 1199.782078 | 0.351153365  | 0.104007085 | 0.002263998 | GATAD2B       | GATA zinc finger domain containing 2B [Source:HGNC Symbol;Acc:30778]                                   |
| 6075 | ENSG00000083812 | 144.266433  | 0.864130279  | 0.256061747 | 0.00227641  | ZNF324        | zinc finger protein 324 [Source:HGNC Symbol;Acc:14096]                                                 |
| 6076 | ENSG00000197122 | 447.8389414 | 0.528381433  | 0.156590619 | 0.002279425 | SRC           | v-src avian sarcoma (Schmidt-Ruppin A-2) viral oncogene homolog [Source:HGNC Symbol;Acc:11283]         |
| 6077 | ENSG00000196110 | 138.3824465 | 0.897126613  | 0.265953889 | 0.00228771  | ZNF699        | zinc finger protein 699 [Source:HGNC Symbol;Acc:24750]                                                 |
| 6078 | ENSG00000260189 | 62.31184026 | -1.197830797 | 0.355162575 | 0.002292444 | EXOSC4        | exosome component 4 [Source:HGNC Symbol;Acc:18189]                                                     |
| 6079 | ENSG00000115368 | 705.9052647 | 0.434084961  | 0.128710778 | 0.002292613 | WDR75         | WD repeat domain 75 [Source:HGNC Symbol;Acc:25725]                                                     |
| 6080 | ENSG00000161298 | 97.18527393 | 1.102828827  | 0.327134629 | 0.002303782 | ZNF382        | zinc finger protein 382 [Source:HGNC Symbol;Acc:17409]                                                 |
| 6081 | ENSG00000159202 | 1910.957037 | 0.291042938  | 0.086344663 | 0.002307302 | UBE2Z         | ubiquitin-conjugating enzyme E2Z [Source:HGNC Symbol;Acc:25847]                                        |
| 6082 | ENSG00000106080 | 191.5625528 | -0.810320255 | 0.240411497 | 0.002308229 | FKBP14        | FK506 binding protein 14, 22 kDa [Source:HGNC Symbol;Acc:18625]                                        |
| 6083 | ENSG00000170606 | 1604.892623 | -0.325963247 | 0.096716603 | 0.002310052 | HSPA4         | heat shock 70kDa protein 4 [Source:HGNC Symbol;Acc:5237]                                               |
| 6084 | ENSG00000087111 | 1374.453976 | -0.324319736 | 0.096231602 | 0.002310449 | PIGS          | phosphatidylinositol glycan anchor biosynthesis, class S [Source:HGNC Symbol;Acc:14937]                |
| 6085 | ENSG00000166266 | 649.5319129 | -0.481010884 | 0.14275967  | 0.002316993 | CUL5          | cullin 5 [Source:HGNC Symbol;Acc:2556]                                                                 |
| 6086 | ENSG00000170471 | 2513.099376 | -0.327730711 | 0.09727152  | 0.002317759 | RALGAPB       | Ral GTPase activating protein, beta subunit (non-catalytic) [Source:HGNC Symbol;Acc:29221]             |
| 6087 | ENSG00000187186 | 28.22350216 | -1.654201883 | 0.490978582 | 0.002317759 | RP11-195F19.5 | HCG2040265, isoform CRA_a; Uncharacterized protein; cDNA FLJ50015 [Source:UniProtKB/TrEMBL;Acc:B7Z3J9] |
| 6088 | ENSG00000080806 | 57.35050276 | -1.269392099 | 0.376813503 | 0.002321074 | CDKL5         | cyclin-dependent kinase-like 5 [Source:HGNC Symbol;Acc:11411]                                          |
| 6089 | ENSG00000117419 | 224.2627824 | 0.707500644  | 0.210044332 | 0.002324187 | ERI3          | ERI1 exoribonuclease family member 3 [Source:HGNC Symbol;Acc:17276]                                    |
| 6090 | ENSG00000172071 | 473.4548136 | 0.58608426   | 0.174018071 | 0.002327087 | EIF2AK3       | eukaryotic translation initiation factor 2-alpha kinase 3 [Source:HGNC Symbol;Acc:3255]                |
| 6091 | ENSG00000261992 | 1200.211599 | 0.350058058  | 0.103941143 | 0.002327563 | GATAD2B       | GATA zinc finger domain containing 2B [Source:HGNC Symbol;Acc:30778]                                   |
| 6092 | ENSG00000206052 | 56.8615018  | 1.357109884  | 0.402981441 | 0.002328662 | DOK6          | docking protein 6 [Source:HGNC Symbol;Acc:28301]                                                       |
| 6093 | ENSG00000054118 | 3892.046578 | 0.26635682   | 0.079095067 | 0.002329298 | THRAP3        | thyroid hormone receptor associated protein 3 [Source:HGNC Symbol;Acc:22964]                           |
| 6094 | ENSG00000136280 | 3154.658103 | 0.357509494  | 0.106171515 | 0.0023312   | CCM2          | cerebral cavernous malformation 2 [Source:HGNC Symbol;Acc:21708]                                       |
| 6095 | ENSG00000269671 | 475.3453597 | 0.511211388  | 0.151820152 | 0.002331372 | RABL2B        | RAB, member of RAS oncogene family-like 2B [Source:HGNC Symbol;Acc:9800]                               |
| 6096 | ENSG00000181751 | 132.4713238 | -0.901349264 | 0.26781829  | 0.002345329 | C5orf30       | chromosome 5 open reading frame 30 [Source:HGNC Symbol;Acc:25052]                                      |
| 6097 | ENSG00000185596 | 1647.750635 | -0.415319159 | 0.123410714 | 0.002346511 | WASH3P        | WAS protein family homolog 3 pseudogene [Source:HGNC Symbol;Acc:24362]                                 |
| 6098 | ENSG00000159335 | 532.2776123 | -0.46962614  | 0.139612979 | 0.002359378 | PTMS          | parathyrosin [Source:HGNC Symbol;Acc:9629]                                                             |



|      |                 |             |              |             |             |          |                                                                                                            |
|------|-----------------|-------------|--------------|-------------|-------------|----------|------------------------------------------------------------------------------------------------------------|
| 6099 | ENSG00000100201 | 43159.648   | -0.166533735 | 0.04950848  | 0.002359378 | DDX17    | DEAD (Asp-Glu-Ala-Asp) box helicase 17 [Source:HGNC Symbol;Acc:2740]                                       |
| 6100 | ENSG00000165181 | 99.6531981  | -1.01023734  | 0.300484902 | 0.00237317  | C9orf84  | chromosome 9 open reading frame 84 [Source:HGNC Symbol;Acc:26535]                                          |
| 6101 | ENSG00000205765 | 770.2759335 | 0.413618948  | 0.123027388 | 0.00237317  | C5orf51  | chromosome 5 open reading frame 51 [Source:HGNC Symbol;Acc:27750]                                          |
| 6102 | ENSG00000140474 | 859.8556294 | 0.425632639  | 0.126601141 | 0.00237317  | ULK3     | unc-51 like kinase 3 [Source:HGNC Symbol;Acc:19703]                                                        |
| 6103 | ENSG00000228601 | 51.52633779 | 1.433674452  | 0.426537085 | 0.002379678 | RPL39P   | ribosomal protein L39 pseudogene [Source:HGNC Symbol;Acc:16558]                                            |
| 6104 | ENSG00000154764 | 27.0593716  | 1.656577275  | 0.493045621 | 0.002390589 | WNT7A    | wingless-type MMTV integration site family, member 7A [Source:HGNC Symbol;Acc:12786]                       |
| 6105 | ENSG00000262485 | 320.0686074 | 0.5971929    | 0.177767575 | 0.002394384 | TUSC2    | tumor suppressor candidate 2 [Source:HGNC Symbol;Acc:17034]                                                |
| 6106 | ENSG00000079974 | 475.2257325 | 0.510377467  | 0.151933622 | 0.002395633 | RABL2B   | RAB, member of RAS oncogene family-like 2B [Source:HGNC Symbol;Acc:9800]                                   |
| 6107 | ENSG00000165105 | 118.3230211 | -0.972313811 | 0.289494925 | 0.002400079 | RASEF    | RAS and EF-hand domain containing [Source:HGNC Symbol;Acc:26464]                                           |
| 6108 | ENSG00000155959 | 545.8066989 | -0.536347697 | 0.159751297 | 0.002410685 | VBP1     | von Hippel-Lindau binding protein 1 [Source:HGNC Symbol;Acc:12662]                                         |
| 6109 | ENSG00000099953 | 36.99400476 | 1.498765166  | 0.446430114 | 0.002411768 | MMP11    | matrix metalloproteinase 11 (stromelysin 3) [Source:HGNC Symbol;Acc:7157]                                  |
| 6110 | ENSG00000140382 | 731.5904761 | 0.410940266  | 0.122409822 | 0.002412565 | HMG20A   | high mobility group 20A [Source:HGNC Symbol;Acc:5001]                                                      |
| 6111 | ENSG00000177565 | 2593.628896 | -0.254230139 | 0.07573559  | 0.002414559 | TBL1XR1  | transducin (beta)-like 1 X-linked receptor 1 [Source:HGNC Symbol;Acc:29529]                                |
| 6112 | ENSG00000143543 | 2308.883327 | 0.277118255  | 0.082567851 | 0.002419086 | JTB      | jumping translocation breakpoint [Source:HGNC Symbol;Acc:6201]                                             |
| 6113 | ENSG00000186866 | 651.6288813 | 0.455459529  | 0.135710795 | 0.002419958 | POFUT2   | protein O-fucosyltransferase 2 [Source:HGNC Symbol;Acc:14683]                                              |
| 6114 | ENSG00000154114 | 247.6954947 | 0.693282871  | 0.206622614 | 0.00242652  | TBCEL    | tubulin folding cofactor E-like [Source:HGNC Symbol;Acc:28115]                                             |
| 6115 | ENSG00000211716 | 24.57886294 | 1.692402232  | 0.504425971 | 0.00242763  | TRBV9    | T cell receptor beta variable 9 [Source:HGNC Symbol;Acc:12246]                                             |
| 6116 | ENSG00000173145 | 206.9826512 | 0.756710568  | 0.225540878 | 0.00242763  | NOC3L    | nucleolar complex associated 3 homolog (S. cerevisiae) [Source:HGNC Symbol;Acc:24034]                      |
| 6117 | ENSG00000160752 | 1502.441311 | -0.311192599 | 0.09277382  | 0.002434068 | FDP5     | farnesyl diphosphate synthase [Source:HGNC Symbol;Acc:3631]                                                |
| 6118 | ENSG00000102362 | 52.11513797 | -1.288239576 | 0.384149087 | 0.002440948 | SYTL4    | synaptotagmin-like 4 [Source:HGNC Symbol;Acc:15588]                                                        |
| 6119 | ENSG00000180228 | 375.8284184 | 0.555976569  | 0.165810827 | 0.002444176 | PRKRA    | protein kinase, interferon-inducible double stranded RNA dependent activator [Source:HGNC Symbol;Acc:9438] |
| 6120 | ENSG00000104960 | 2194.320613 | 0.683950575  | 0.203997389 | 0.002446743 | PTOV1    | prostate tumor overexpressed 1 [Source:HGNC Symbol;Acc:9632]                                               |
| 6121 | ENSG00000149639 | 256.9143983 | 0.670425779  | 0.199986437 | 0.002449753 | SOGA1    | suppressor of glucose, autophagy associated 1 [Source:HGNC Symbol;Acc:16111]                               |
| 6122 | ENSG00000130487 | 32.14234141 | 1.596615401  | 0.476279021 | 0.002450125 | KLHDC7B  | kelch domain containing 7B [Source:HGNC Symbol;Acc:25145]                                                  |
| 6123 | ENSG00000261768 | 63.93421899 | 1.211660707  | 0.361518099 | 0.002455349 | SLC2A6   | solute carrier family 2 (facilitated glucose transporter), member 6 [Source:HGNC Symbol;Acc:11011]         |
| 6124 | ENSG00000160326 | 63.9342222  | 1.211660376  | 0.361518201 | 0.002455349 | SLC2A6   | solute carrier family 2 (facilitated glucose transporter), member 6 [Source:HGNC Symbol;Acc:11011]         |
| 6125 | ENSG00000143951 | 586.2092    | -0.479274254 | 0.143020016 | 0.002459294 | WDPCP    | WD repeat containing planar cell polarity effector [Source:HGNC Symbol;Acc:28027]                          |
| 6126 | ENSG00000174032 | 502.4615749 | 0.49996288   | 0.149213567 | 0.002462857 | SLC25A30 | solute carrier family 25, member 30 [Source:HGNC Symbol;Acc:27371]                                         |

|      |                 |             |              |             |             |               |                                                                                                    |
|------|-----------------|-------------|--------------|-------------|-------------|---------------|----------------------------------------------------------------------------------------------------|
| 6127 | ENSG00000131876 | 734.6946719 | 0.422689543  | 0.126154388 | 0.002463162 | SNRPA1        | small nuclear ribonucleoprotein polypeptide A' [Source:HGNC Symbol;Acc:11152]                      |
| 6128 | ENSG00000134744 | 1696.546325 | -0.339839363 | 0.101437279 | 0.002465716 | ZCHC11        | zinc finger, CCHC domain containing 11 [Source:HGNC Symbol;Acc:28981]                              |
| 6129 | ENSG00000173846 | 503.7858782 | 0.507014951  | 0.151375256 | 0.002472783 | PLK3          | polo-like kinase 3 [Source:HGNC Symbol;Acc:2154]                                                   |
| 6130 | ENSG00000112212 | 18.31607797 | -1.754298903 | 0.523771673 | 0.002472783 | TSPO2         | translocator protein 2 [Source:HGNC Symbol;Acc:21256]                                              |
| 6131 | ENSG00000197779 | 232.8041313 | -0.691691534 | 0.206562933 | 0.002479375 | ZNF81         | zinc finger protein 81 [Source:HGNC Symbol;Acc:13156]                                              |
| 6132 | ENSG00000262744 | 356.7047931 | 0.584127178  | 0.174492798 | 0.002487963 | RHBDD2        | rhomboid domain containing 2 [Source:HGNC Symbol;Acc:23082]                                        |
| 6133 | ENSG00000177191 | 453.8346043 | -0.626653364 | 0.187210388 | 0.002489628 | B3GNT8        | UDP-GlcNAc:betaGal beta-1,3-N-acetylglucosaminyltransferase 8 [Source:HGNC Symbol;Acc:24139]       |
| 6134 | ENSG00000166548 | 635.8197482 | -0.588616067 | 0.175848229 | 0.002489628 | TK2           | thymidine kinase 2, mitochondrial [Source:HGNC Symbol;Acc:11831]                                   |
| 6135 | ENSG00000136444 | 666.4061979 | 0.43798266   | 0.130857712 | 0.002491751 | RSAD1         | radical S-adenosyl methionine domain containing 1 [Source:HGNC Symbol;Acc:25634]                   |
| 6136 | ENSG00000119718 | 314.4899561 | -0.586152533 | 0.175156526 | 0.002496424 | EIF2B2        | eukaryotic translation initiation factor 2B, subunit 2 beta, 39kDa [Source:HGNC Symbol;Acc:3258]   |
| 6137 | ENSG00000126861 | 258.0914751 | -0.664537277 | 0.198584193 | 0.002496687 | OMG           | oligodendrocyte myelin glycoprotein [Source:HGNC Symbol;Acc:8135]                                  |
| 6138 | ENSG00000267825 | 920.4374319 | 0.387532862  | 0.115838061 | 0.002504437 | ZNF185        | zinc finger protein 185 (LIM domain) [Source:HGNC Symbol;Acc:12976]                                |
| 6139 | ENSG00000168062 | 104.8015348 | -1.029781681 | 0.30794915  | 0.002516759 | BATF2         | basic leucine zipper transcription factor, ATF-like 2 [Source:HGNC Symbol;Acc:25163]               |
| 6140 | ENSG00000126217 | 65.45498402 | 1.29054165   | 0.38592776  | 0.002516759 | MCF2L         | MCF.2 cell line derived transforming sequence-like [Source:HGNC Symbol;Acc:14576]                  |
| 6141 | ENSG00000185414 | 38.91910086 | 1.572929617  | 0.470377342 | 0.002516759 | MRPL30        | mitochondrial ribosomal protein L30 [Source:HGNC Symbol;Acc:14036]                                 |
| 6142 | ENSG00000154654 | 6.6682028   | -1.842785107 | 0.551311209 | 0.0025293   | NCAM2         | neural cell adhesion molecule 2 [Source:HGNC Symbol;Acc:7657]                                      |
| 6143 | ENSG00000114383 | 319.7198079 | 0.595020898  | 0.178025012 | 0.002530076 | TUSC2         | tumor suppressor candidate 2 [Source:HGNC Symbol;Acc:17034]                                        |
| 6144 | ENSG00000204237 | 316.1022457 | 0.642376777  | 0.19219393  | 0.002530076 | OXL1          | oxidoreductase-like domain containing 1 [Source:HGNC Symbol;Acc:27901]                             |
| 6145 | ENSG00000100836 | 5859.386021 | -0.220942951 | 0.06610449  | 0.002530076 | PABPN1        | poly(A) binding protein, nuclear 1 [Source:HGNC Symbol;Acc:8565]                                   |
| 6146 | ENSG0000055044  | 886.4087593 | 0.381840454  | 0.114249308 | 0.002531126 | NOP58         | NOP58 ribonucleoprotein [Source:HGNC Symbol;Acc:29926]                                             |
| 6147 | ENSG00000197301 | 77.77469338 | -1.112409025 | 0.332856205 | 0.002532154 | RP11-366L20.2 | Uncharacterized protein [Source:UniProtKB/TrEMBL;Acc:B7WP15]                                       |
| 6148 | ENSG00000139350 | 548.1981202 | -0.482105024 | 0.14429165  | 0.002539289 | NEDD1         | neural precursor cell expressed, developmentally down-regulated 1 [Source:HGNC Symbol;Acc:7723]    |
| 6149 | ENSG00000243492 | 40.35278747 | -1.493116956 | 0.447001383 | 0.002547013 | HLA-L         | major histocompatibility complex, class I, L (pseudogene) [Source:HGNC Symbol;Acc:4970]            |
| 6150 | ENSG00000141543 | 1030.845523 | -0.344554134 | 0.10315654  | 0.00254831  | EIF4A3        | eukaryotic translation initiation factor 4A3 [Source:HGNC Symbol;Acc:18683]                        |
| 6151 | ENSG00000121774 | 2366.338443 | 0.257085636  | 0.076970461 | 0.002548388 | KHDRBS1       | KH domain containing, RNA binding, signal transduction associated 1 [Source:HGNC Symbol;Acc:18116] |
| 6152 | ENSG00000147394 | 920.3047518 | 0.386843718  | 0.115859179 | 0.002558479 | ZNF185        | zinc finger protein 185 (LIM domain) [Source:HGNC Symbol;Acc:12976]                                |
| 6153 | ENSG00000183638 | 232.8075024 | -0.684558623 | 0.205038907 | 0.00256024  | RP11          | retinitis pigmentosa 1-like 1 [Source:HGNC Symbol;Acc:15946]                                       |
| 6154 | ENSG00000105520 | 2528.250465 | -0.290437705 | 0.087006024 | 0.002564836 | DKFZP761J1410 | Lipid phosphate phosphatase-related protein type 2 [Source:UniProtKB/Swiss-Prot;Acc:Q96GM1]        |

|      |                 |             |              |             |             |         |                                                                                                                       |
|------|-----------------|-------------|--------------|-------------|-------------|---------|-----------------------------------------------------------------------------------------------------------------------|
| 6155 | ENSG00000054983 | 1253.336108 | -0.393942027 | 0.118042836 | 0.002572304 | GALC    | galactosylceramidase [Source:HGNC Symbol;Acc:4115]                                                                    |
| 6156 | ENSG00000170417 | 248.2983518 | -0.739719062 | 0.22166172  | 0.002573064 | TMEM182 | transmembrane protein 182 [Source:HGNC Symbol;Acc:26391]                                                              |
| 6157 | ENSG00000163468 | 1549.465957 | 0.292462766  | 0.087641793 | 0.00257384  | CCT3    | chaperonin containing TCP1, subunit 3 (gamma) [Source:HGNC Symbol;Acc:1616]                                           |
| 6158 | ENSG00000177427 | 131.8050961 | 0.936366091  | 0.280610442 | 0.002574496 | MIEF2   | mitochondrial elongation factor 2 [Source:HGNC Symbol;Acc:17920]                                                      |
| 6159 | ENSG00000176641 | 22.12139019 | -1.717477077 | 0.514698124 | 0.002574496 | RNF152  | ring finger protein 152 [Source:HGNC Symbol;Acc:26811]                                                                |
| 6160 | ENSG00000242802 | 921.3523814 | 0.503026545  | 0.150796169 | 0.002583897 | AP5Z1   | adaptor-related protein complex 5, zeta 1 subunit [Source:HGNC Symbol;Acc:22197]                                      |
| 6161 | ENSG00000230705 | 325.6551826 | 0.608191549  | 0.182468685 | 0.002608457 | TAP1    | transporter 1, ATP-binding cassette, sub-family B (MDR/TAP) [Source:HGNC Symbol;Acc:43]                               |
| 6162 | ENSG00000185986 | 145.5324647 | 0.902812757  | 0.270875117 | 0.002609723 | SDHAP3  | succinate dehydrogenase complex, subunit A, flavoprotein pseudogene 3 [Source:HGNC Symbol;Acc:18781]                  |
| 6163 | ENSG00000204257 | 26.81290401 | 1.602930879  | 0.480945939 | 0.002610022 | HLA-DMA | major histocompatibility complex, class II, DM alpha [Source:HGNC Symbol;Acc:4934]                                    |
| 6164 | ENSG00000141337 | 398.2083235 | -0.554854478 | 0.166493437 | 0.002612231 | ARSG    | arylsulfatase G [Source:HGNC Symbol;Acc:24102]                                                                        |
| 6165 | ENSG00000156869 | 28.93520592 | -1.555473832 | 0.466767728 | 0.002613255 | FRRS1   | ferric-chelate reductase 1 [Source:HGNC Symbol;Acc:27622]                                                             |
| 6166 | ENSG00000124217 | 90.07689808 | 1.053068373  | 0.316023705 | 0.002614596 | MOCS3   | molybdenum cofactor synthesis 3 [Source:HGNC Symbol;Acc:15765]                                                        |
| 6167 | ENSG00000135439 | 1319.063507 | -0.309016829 | 0.092736483 | 0.002614596 | AGAP2   | ArfGAP with GTPase domain, ankyrin repeat and PH domain 2 [Source:HGNC Symbol;Acc:16921]                              |
| 6168 | ENSG00000213079 | 1499.028631 | 0.374860895  | 0.112499038 | 0.002614906 | SCAF8   | SR-related CTD-associated factor 8 [Source:HGNC Symbol;Acc:20959]                                                     |
| 6169 | ENSG00000138604 | 172.6538723 | -0.792192909 | 0.237806737 | 0.002622749 | GLCE    | glucuronic acid epimerase [Source:HGNC Symbol;Acc:17855]                                                              |
| 6170 | ENSG00000127955 | 73.1030753  | 1.439787832  | 0.432262225 | 0.002626343 | GNAI1   | guanine nucleotide binding protein (G protein), alpha inhibiting activity polypeptide 1 [Source:HGNC Symbol;Acc:4384] |
| 6171 | ENSG00000132256 | 555.2277608 | 0.475244343  | 0.142689941 | 0.002627692 | TRIM5   | tripartite motif containing 5 [Source:HGNC Symbol;Acc:16276]                                                          |
| 6172 | ENSG00000229453 | 115.3662436 | -0.935627669 | 0.280919735 | 0.002627692 | SPINK8  | serine peptidase inhibitor, Kazal type 8 (putative) [Source:HGNC Symbol;Acc:33160]                                    |
| 6173 | ENSG00000213221 | 44.10179826 | 1.412492173  | 0.424165388 | 0.002632336 | DNLZ    | DNL-type zinc finger [Source:HGNC Symbol;Acc:33879]                                                                   |
| 6174 | ENSG00000173726 | 1541.180108 | 0.351956543  | 0.105712765 | 0.002638382 | TOMM20  | translocase of outer mitochondrial membrane 20 homolog (yeast) [Source:HGNC Symbol;Acc:20947]                         |
| 6175 | ENSG00000111725 | 971.8790781 | -0.401504183 | 0.120620747 | 0.002644756 | PRKAB1  | protein kinase, AMP-activated, beta 1 non-catalytic subunit [Source:HGNC Symbol;Acc:9378]                             |
| 6176 | ENSG00000108556 | 73.30959143 | 1.164767259  | 0.349957379 | 0.002647535 | CHRNE   | cholinergic receptor, nicotinic, epsilon (muscle) [Source:HGNC Symbol;Acc:1966]                                       |
| 6177 | ENSG00000065923 | 49.83825004 | 1.302324765  | 0.391319702 | 0.002649759 | SLC9A7  | solute carrier family 9, subfamily A (NHE7, cation proton antiporter 7), member 7 [Source:HGNC Symbol;Acc:17123]      |
| 6178 | ENSG00000271342 | 49.83770614 | 1.30224126   | 0.391319674 | 0.002651358 | SLC9A7  | solute carrier family 9, subfamily A (NHE7, cation proton antiporter 7), member 7 [Source:HGNC Symbol;Acc:17123]      |
| 6179 | ENSG00000005486 | 357.2326676 | 0.580863232  | 0.174582237 | 0.002657201 | RHBDD2  | rhomboid domain containing 2 [Source:HGNC Symbol;Acc:23082]                                                           |
| 6180 | ENSG00000256812 | 30.78149329 | -1.522893925 | 0.457785575 | 0.002661616 | CAPNS2  | calpain, small subunit 2 [Source:HGNC Symbol;Acc:16371]                                                               |
| 6181 | ENSG00000270647 | 1503.21122  | 0.313766476  | 0.094331508 | 0.002665415 | TAF15   | TAF15 RNA polymerase II, TATA box binding protein (TBP)-associated factor, 68kDa [Source:HGNC Symbol;Acc:11547]       |
| 6182 | ENSG00000227816 | 325.4888335 | 0.607626804  | 0.182698354 | 0.002668463 | TAP1    | transporter 1, ATP-binding cassette, sub-family B (MDR/TAP) [Source:HGNC Symbol;Acc:43]                               |

|      |                 |             |              |             |             |              |                                                                                                                 |
|------|-----------------|-------------|--------------|-------------|-------------|--------------|-----------------------------------------------------------------------------------------------------------------|
| 6183 | ENSG00000258352 | 36.48766868 | 1.486829314  | 0.447074732 | 0.002669593 | RP11-23J18.1 |                                                                                                                 |
| 6184 | ENSG00000231997 | 41.88791459 | -1.381470547 | 0.415449042 | 0.002673352 | FAM27D1      | family with sequence similarity 27, member D1 [Source:HGNC Symbol;Acc:32015]                                    |
| 6185 | ENSG00000107816 | 314.1079024 | 0.654607404  | 0.196939361 | 0.002685742 | LZTS2        | leucine zipper, putative tumor suppressor 2 [Source:HGNC Symbol;Acc:29381]                                      |
| 6186 | ENSG00000092470 | 284.4838245 | -0.61433735  | 0.184826079 | 0.002685742 | WDR76        | WD repeat domain 76 [Source:HGNC Symbol;Acc:25773]                                                              |
| 6187 | ENSG00000263074 | 398.0166933 | -0.554085338 | 0.166733614 | 0.00269196  | ARSG         | arylsulfatase G [Source:HGNC Symbol;Acc:24102]                                                                  |
| 6188 | ENSG00000205047 | 248.5311441 | 0.743581712  | 0.223882283 | 0.00270963  | FLJ00104     | HCG1980662; Uncharacterized protein [Source:UniProtKB/TrEMBL;Acc:Q86VH3]                                        |
| 6189 | ENSG00000100417 | 501.3951995 | -0.51347618  | 0.154613371 | 0.002711845 | PMM1         | phosphomannomutase 1 [Source:HGNC Symbol;Acc:9114]                                                              |
| 6190 | ENSG00000237765 | 1028.169692 | -0.382003039 | 0.115038064 | 0.002714975 | FAM200B      | family with sequence similarity 200, member B [Source:HGNC Symbol;Acc:27740]                                    |
| 6191 | ENSG00000169718 | 864.4884973 | 0.405698149  | 0.122185002 | 0.002717522 | DUS1L        | dihydrouridine synthase 1-like ( <i>S. cerevisiae</i> ) [Source:HGNC Symbol;Acc:30086]                          |
| 6192 | ENSG00000205763 | 82.896396   | -1.048047623 | 0.315742229 | 0.002727278 | RP9P         | retinitis pigmentosa 9 pseudogene [Source:HGNC Symbol;Acc:33969]                                                |
| 6193 | ENSG00000082641 | 1541.014064 | 0.298197043  | 0.089881143 | 0.00274282  | NFE2L1       | nuclear factor, erythroid 2-like 1 [Source:HGNC Symbol;Acc:7781]                                                |
| 6194 | ENSG00000172660 | 1503.137355 | 0.312914287  | 0.094363836 | 0.002758537 | TAF15        | TAF15 RNA polymerase II, TATA box binding protein (TBP)-associated factor, 68kDa [Source:HGNC Symbol;Acc:11547] |
| 6195 | ENSG00000125482 | 434.9528528 | 0.570744435  | 0.172123874 | 0.002759541 | TTF1         | transcription termination factor, RNA polymerase I [Source:HGNC Symbol;Acc:12397]                               |
| 6196 | ENSG00000116044 | 1539.546769 | 0.313351673  | 0.094508145 | 0.002761946 | NFE2L2       | nuclear factor, erythroid 2-like 2 [Source:HGNC Symbol;Acc:7782]                                                |
| 6197 | ENSG00000269594 | 232.7634168 | -0.688100783 | 0.207547839 | 0.002763684 | ZNF81        | zinc finger protein 81 [Source:HGNC Symbol;Acc:13156]                                                           |
| 6198 | ENSG00000236315 | 27.01783663 | 1.611267927  | 0.486013441 | 0.0027639   | NCR3         | natural cytotoxicity triggering receptor 3 [Source:HGNC Symbol;Acc:19077]                                       |
| 6199 | ENSG00000204475 | 27.01785281 | 1.611274188  | 0.486015691 | 0.0027639   | NCR3         | natural cytotoxicity triggering receptor 3 [Source:HGNC Symbol;Acc:19077]                                       |
| 6200 | ENSG00000236979 | 27.0169188  | 1.611146988  | 0.486016478 | 0.002766096 | NCR3         | natural cytotoxicity triggering receptor 3 [Source:HGNC Symbol;Acc:19077]                                       |
| 6201 | ENSG00000237103 | 27.01649983 | 1.611079694  | 0.486014956 | 0.002766528 | NCR3         | natural cytotoxicity triggering receptor 3 [Source:HGNC Symbol;Acc:19077]                                       |
| 6202 | ENSG00000206430 | 27.01656247 | 1.611081501  | 0.486016346 | 0.002766528 | NCR3         | natural cytotoxicity triggering receptor 3 [Source:HGNC Symbol;Acc:19077]                                       |
| 6203 | ENSG00000154839 | 76.46976171 | -1.123115072 | 0.338875644 | 0.002772337 | SKA1         | spindle and kinetochore associated complex subunit 1 [Source:HGNC Symbol;Acc:28109]                             |
| 6204 | ENSG00000130177 | 1316.134616 | 0.327025598  | 0.09868804  | 0.002776938 | CDC16        | cell division cycle 16 [Source:HGNC Symbol;Acc:1720]                                                            |
| 6205 | ENSG00000125148 | 121.6672547 | 0.993750757  | 0.299994239 | 0.002788077 | MT2A         | metallothionein 2A [Source:HGNC Symbol;Acc:7406]                                                                |
| 6206 | ENSG00000104388 | 1480.637243 | -0.31383941  | 0.094784222 | 0.002802341 | RAB2A        | RAB2A, member RAS oncogene family [Source:HGNC Symbol;Acc:9763]                                                 |
| 6207 | ENSG00000119457 | 62.49493579 | 1.236002754  | 0.373317361 | 0.002804194 | SLC46A2      | solute carrier family 46, member 2 [Source:HGNC Symbol;Acc:16055]                                               |
| 6208 | ENSG00000059758 | 840.3810011 | 0.3859994    | 0.116607219 | 0.002809863 | CDK17        | cyclin-dependent kinase 17 [Source:HGNC Symbol;Acc:8750]                                                        |
| 6209 | ENSG00000135956 | 3638.214085 | 0.213772753  | 0.06458197  | 0.002810937 | TMEM127      | transmembrane protein 127 [Source:HGNC Symbol;Acc:26038]                                                        |
| 6210 | ENSG00000007545 | 807.6410844 | 0.429554446  | 0.129772563 | 0.002810937 | CRAMP1L      | Crm, cramped-like ( <i>Drosophila</i> ) [Source:HGNC Symbol;Acc:14122]                                          |

|      |                 |             |              |             |             |          |                                                                                      |
|------|-----------------|-------------|--------------|-------------|-------------|----------|--------------------------------------------------------------------------------------|
| 6211 | ENSG00000134548 | 14.15051539 | 1.848516272  | 0.558601741 | 0.002819246 | C12orf39 | chromosome 12 open reading frame 39 [Source:HGNC Symbol;Acc:28139]                   |
| 6212 | ENSG00000262664 | 279.3104754 | 0.620898595  | 0.187671083 | 0.002826294 | OVCA2    | ovarian tumor suppressor candidate 2 [Source:HGNC Symbol;Acc:24203]                  |
| 6213 | ENSG00000088298 | 1274.22941  | -0.317165753 | 0.09589507  | 0.002836104 | EDEM2    | ER degradation enhancer, mannosidase alpha-like 2 [Source:HGNC Symbol;Acc:15877]     |
| 6214 | ENSG00000049618 | 1367.61855  | 0.303114899  | 0.091652278 | 0.002837262 | ARID1B   | AT rich interactive domain 1B (SWI1-like) [Source:HGNC Symbol;Acc:18040]             |
| 6215 | ENSG00000140992 | 2378.424265 | -0.281728328 | 0.085185831 | 0.002837262 | PDPK1    | 3-phosphoinositide dependent protein kinase-1 [Source:HGNC Symbol;Acc:8816]          |
| 6216 | ENSG00000157353 | 502.5510366 | -0.462800209 | 0.139938642 | 0.002837365 | FUK      | fucokinase [Source:HGNC Symbol;Acc:29500]                                            |
| 6217 | ENSG00000261031 | 25.25606386 | 1.65208375   | 0.499720404 | 0.002848568 | TRBV9    | T cell receptor beta variable 9 [Source:HGNC Symbol;Acc:12246]                       |
| 6218 | ENSG00000158526 | 527.367462  | 0.469949458  | 0.1421522   | 0.002848683 | TSR2     | TSR2, 20S rRNA accumulation, homolog (S. cerevisiae) [Source:HGNC Symbol;Acc:25455]  |
| 6219 | ENSG00000067365 | 326.5161044 | -0.576695604 | 0.174449198 | 0.002849766 | METTL22  | methyltransferase like 22 [Source:HGNC Symbol;Acc:28368]                             |
| 6220 | ENSG00000204020 | 214.3491091 | -0.717814702 | 0.217276168 | 0.002870847 | LIPN     | lipase, family member N [Source:HGNC Symbol;Acc:23452]                               |
| 6221 | ENSG00000107130 | 18.55984151 | -1.836500736 | 0.556073564 | 0.002880953 | NCS1     | neuronal calcium sensor 1 [Source:HGNC Symbol;Acc:3953]                              |
| 6222 | ENSG00000268733 | 18.55984149 | -1.836500733 | 0.556073564 | 0.002880953 | NCS1     | neuronal calcium sensor 1 [Source:HGNC Symbol;Acc:3953]                              |
| 6223 | ENSG00000189051 | 26.97915539 | -1.62601716  | 0.492398315 | 0.00288442  | RNF222   | ring finger protein 222 [Source:HGNC Symbol;Acc:34517]                               |
| 6224 | ENSG00000188599 | 346.7863146 | 0.577025911  | 0.174755044 | 0.002887318 | NPIPP1   | nuclear pore complex interacting protein pseudogene 1 [Source:HGNC Symbol;Acc:35407] |
| 6225 | ENSG00000115977 | 499.2468253 | 0.488036314  | 0.147806696 | 0.002887446 | AAK1     | AP2 associated kinase 1 [Source:HGNC Symbol;Acc:19679]                               |
| 6226 | ENSG00000154124 | 1000.408577 | -0.400391748 | 0.12126549  | 0.002887476 | FAM105B  | family with sequence similarity 105, member B [Source:HGNC Symbol;Acc:25118]         |
| 6227 | ENSG00000140839 | 45.32822406 | 1.364026677  | 0.413120809 | 0.002887476 | CLEC18B  | C-type lectin domain family 18, member B [Source:HGNC Symbol;Acc:33849]              |
| 6228 | ENSG00000122550 | 468.3883713 | -0.617938175 | 0.18724528  | 0.002903613 | KLHL7    | kelch-like family member 7 [Source:HGNC Symbol;Acc:15646]                            |
| 6229 | ENSG00000268142 | 254.7624299 | 0.642374017  | 0.194653177 | 0.00290375  | PQBP1    | polyglutamine binding protein 1 [Source:HGNC Symbol;Acc:9330]                        |
| 6230 | ENSG00000137210 | 817.3457952 | -0.386930747 | 0.117356782 | 0.002934986 | TMEM14B  | transmembrane protein 14B [Source:HGNC Symbol;Acc:21384]                             |
| 6231 | ENSG00000102312 | 70.05815655 | 1.162283111  | 0.352642154 | 0.002946222 | PORCN    | porcupine homolog (Drosophila) [Source:HGNC Symbol;Acc:17652]                        |
| 6232 | ENSG00000131374 | 1433.471068 | -0.297034431 | 0.090126813 | 0.002947733 | TBC1D5   | TBC1 domain family, member 5 [Source:HGNC Symbol;Acc:19166]                          |
| 6233 | ENSG00000138448 | 301.0060119 | -0.759931937 | 0.230597234 | 0.002949822 | ITGAV    | integrin, alpha V [Source:HGNC Symbol;Acc:6150]                                      |
| 6234 | ENSG00000115896 | 87.42204386 | 1.14533874   | 0.347569048 | 0.00295156  | PLCL1    | phospholipase C-like 1 [Source:HGNC Symbol;Acc:9063]                                 |
| 6235 | ENSG00000262634 | 75.27430105 | -1.091432105 | 0.331243637 | 0.002954569 | SKA1     | spindle and kinetochore associated complex subunit 1 [Source:HGNC Symbol;Acc:28109]  |
| 6236 | ENSG00000109445 | 546.6266977 | 0.482031367  | 0.146297125 | 0.002954866 | ZNF330   | zinc finger protein 330 [Source:HGNC Symbol;Acc:15462]                               |
| 6237 | ENSG00000060491 | 1380.782138 | 0.336739603  | 0.102218751 | 0.00296045  | OGFR     | opioid growth factor receptor [Source:HGNC Symbol;Acc:15768]                         |
| 6238 | ENSG00000160633 | 2195.557023 | -0.249358523 | 0.075709464 | 0.002967139 | SAFB     | scaffold attachment factor B [Source:HGNC Symbol;Acc:10520]                          |

|      |                 |             |              |             |             |               |                                                                                       |
|------|-----------------|-------------|--------------|-------------|-------------|---------------|---------------------------------------------------------------------------------------|
| 6239 | ENSG00000142552 | 965.658248  | 0.422538784  | 0.128314761 | 0.0029734   | RCN3          | reticulocalbin 3, EF-hand calcium binding domain [Source:HGNC Symbol;Acc:21145]       |
| 6240 | ENSG00000198538 | 243.2055995 | 0.783325336  | 0.237901715 | 0.002976562 | ZNF28         | zinc finger protein 28 [Source:HGNC Symbol;Acc:13073]                                 |
| 6241 | ENSG00000136237 | 26.01284602 | 1.622772205  | 0.492860511 | 0.002976973 | RAPGEF5       | Rap guanine nucleotide exchange factor (GEF) 5 [Source:HGNC Symbol;Acc:16862]         |
| 6242 | ENSG00000140743 | 445.1774231 | 0.524776839  | 0.159437116 | 0.002988418 | CDR2          | cerebellar degeneration-related protein 2, 62kDa [Source:HGNC Symbol;Acc:1799]        |
| 6243 | ENSG00000104205 | 596.6514032 | -0.510473283 | 0.155100825 | 0.002990058 | SGK3          | serum/glucocorticoid regulated kinase family, member 3 [Source:HGNC Symbol;Acc:10812] |
| 6244 | ENSG00000204531 | 78.82106463 | -1.102079925 | 0.33489473  | 0.002993942 | POU5F1        | POU class 5 homeobox 1 [Source:HGNC Symbol;Acc:9221]                                  |
| 6245 | ENSG00000133116 | 25.88507564 | -1.675229899 | 0.509231399 | 0.003005217 | KL            | klotho [Source:HGNC Symbol;Acc:6344]                                                  |
| 6246 | ENSG00000176946 | 275.6592701 | 0.681390878  | 0.207165744 | 0.003011282 | THAP4         | THAP domain containing 4 [Source:HGNC Symbol;Acc:23187]                               |
| 6247 | ENSG00000262446 | 67.19264677 | -1.265674271 | 0.384814296 | 0.003011418 | GBA           | glucosidase, beta, acid [Source:HGNC Symbol;Acc:4177]                                 |
| 6248 | ENSG00000264708 | 129.8536826 | 1.04823348   | 0.318762858 | 0.003017459 | PDE4DIP       | Phosphodiesterase 4D interacting protein [Source:UniProtKB/TrEMBL;Acc:11VE15]         |
| 6249 | ENSG00000065978 | 5581.516737 | 0.181447968  | 0.055185628 | 0.003022189 | YBX1          | Y box binding protein 1 [Source:HGNC Symbol;Acc:8014]                                 |
| 6250 | ENSG00000198915 | 161.9499052 | 0.838694672  | 0.255105583 | 0.003025136 | RASGEF1A      | RasGEF domain family, member 1A [Source:HGNC Symbol;Acc:24246]                        |
| 6251 | ENSG00000164946 | 16.86468192 | -1.731962398 | 0.526951595 | 0.003034113 | FREM1         | FRAS1 related extracellular matrix 1 [Source:HGNC Symbol;Acc:23399]                   |
| 6252 | ENSG00000196428 | 537.1381831 | -0.507244084 | 0.154360065 | 0.003040621 | TSC2D2        | TSC22 domain family, member 2 [Source:HGNC Symbol;Acc:29095]                          |
| 6253 | ENSG00000130590 | 89.51574654 | 1.020601549  | 0.310631256 | 0.003045935 | SAMD10        | sterile alpha motif domain containing 10 [Source:HGNC Symbol;Acc:16129]               |
| 6254 | ENSG00000241889 | 34.49447289 | 1.495631909  | 0.455233072 | 0.003047096 | RP11-435F17.3 |                                                                                       |
| 6255 | ENSG00000221968 | 341.7139171 | 0.681288541  | 0.207375191 | 0.00304797  | FADS3         | fatty acid desaturase 3 [Source:HGNC Symbol;Acc:3576]                                 |
| 6256 | ENSG00000269083 | 668.7732157 | -0.430364254 | 0.131050864 | 0.003061821 | COX7B         | cytochrome c oxidase subunit VIIb [Source:HGNC Symbol;Acc:2291]                       |
| 6257 | ENSG00000131174 | 668.7710395 | -0.430281239 | 0.131026447 | 0.003061821 | COX7B         | cytochrome c oxidase subunit VIIb [Source:HGNC Symbol;Acc:2291]                       |
| 6258 | ENSG00000116698 | 2665.007272 | -0.248952427 | 0.075823631 | 0.003068045 | SMG7          | SMG7 nonsense mediated mRNA decay factor [Source:HGNC Symbol;Acc:16792]               |
| 6259 | ENSG00000160191 | 49.30836773 | 1.355733806  | 0.412955649 | 0.003070911 | PDE9A         | phosphodiesterase 9A [Source:HGNC Symbol;Acc:8795]                                    |
| 6260 | ENSG00000147224 | 571.444016  | 0.480031068  | 0.146230985 | 0.003073804 | PRPS1         | phosphoribosyl pyrophosphate synthetase 1 [Source:HGNC Symbol;Acc:9462]               |
| 6261 | ENSG00000170017 | 846.2180407 | -0.406633838 | 0.123901767 | 0.003081886 | ALCAM         | activated leukocyte cell adhesion molecule [Source:HGNC Symbol;Acc:400]               |
| 6262 | ENSG00000134452 | 1635.045246 | 0.352980919  | 0.107579844 | 0.003090133 | FBXO18        | F-box protein, helicase, 18 [Source:HGNC Symbol;Acc:13620]                            |
| 6263 | ENSG00000116473 | 4395.138647 | 0.229404044  | 0.069926158 | 0.003094327 | RAP1A         | RAP1A, member of RAS oncogene family [Source:HGNC Symbol;Acc:9855]                    |
| 6264 | ENSG00000147324 | 435.8434949 | 0.627710427  | 0.191338159 | 0.003094327 | MFHAS1        | malignant fibrous histiocytoma amplified sequence 1 [Source:HGNC Symbol;Acc:16982]    |
| 6265 | ENSG00000104983 | 238.9909051 | -0.671972836 | 0.204844045 | 0.003096268 | CCDC61        | coiled-coil domain containing 61 [Source:HGNC Symbol;Acc:33629]                       |
| 6266 | ENSG00000125945 | 237.3499534 | 0.668491489  | 0.203837757 | 0.003105169 | ZNF436        | zinc finger protein 436 [Source:HGNC Symbol;Acc:20814]                                |

|      |                 |             |              |             |             |               |                                                                                                                            |
|------|-----------------|-------------|--------------|-------------|-------------|---------------|----------------------------------------------------------------------------------------------------------------------------|
| 6267 | ENSG00000121851 | 381.0693681 | 0.533263608  | 0.162604567 | 0.003105169 | POLR3GL       | polymerase (RNA) III (DNA directed) polypeptide G (32kD)-like [Source:HGNC Symbol;Acc:28466]                               |
| 6268 | ENSG00000110851 | 706.2671715 | 0.417934369  | 0.127462925 | 0.003111743 | PRDM4         | PR domain containing 4 [Source:HGNC Symbol;Acc:9348]                                                                       |
| 6269 | ENSG00000149743 | 256.7607787 | 0.653006845  | 0.19916341  | 0.003112581 | TRPT1         | tRNA phosphotransferase 1 [Source:HGNC Symbol;Acc:20316]                                                                   |
| 6270 | ENSG00000187607 | 163.8574471 | 1.034937235  | 0.315666401 | 0.00311396  | ZNF286A       | Homo sapiens zinc finger protein 286A (ZNF286A), transcript variant 6, mRNA. [Source:RefSeq mRNA;Acc:NM_001288645]         |
| 6271 | ENSG00000258928 | 16.62323148 | -1.747398992 | 0.533037108 | 0.003117715 | RP11-463J10.2 | Uncharacterized protein [Source:UniProtKB/TrEMBL;Acc:G3V3R0]                                                               |
| 6272 | ENSG00000145075 | 455.5118242 | -0.559909344 | 0.170836804 | 0.003125426 | CCDC39        | coiled-coil domain containing 39 [Source:HGNC Symbol;Acc:25244]                                                            |
| 6273 | ENSG00000151650 | 146.1257958 | -0.813505322 | 0.248322486 | 0.003140995 | VENTX         | VENT homeobox [Source:HGNC Symbol;Acc:13639]                                                                               |
| 6274 | ENSG00000128683 | 11.08588668 | -1.841288739 | 0.562062057 | 0.003141058 | GAD1          | glutamate decarboxylase 1 (brain, 67kDa) [Source:HGNC Symbol;Acc:4092]                                                     |
| 6275 | ENSG00000234951 | 11.82257402 | -1.836812255 | 0.5607558   | 0.003144471 | SAPCD1        | suppressor APC domain containing 1 [Source:HGNC Symbol;Acc:13938]                                                          |
| 6276 | ENSG00000227074 | 11.82242148 | -1.836785843 | 0.560756084 | 0.003144513 | SAPCD1        | suppressor APC domain containing 1 [Source:HGNC Symbol;Acc:13938]                                                          |
| 6277 | ENSG00000197496 | 17.28580116 | -1.788552808 | 0.546137311 | 0.003151122 | SLC2A10       | solute carrier family 2 (facilitated glucose transporter), member 10 [Source:HGNC Symbol;Acc:13444]                        |
| 6278 | ENSG00000227861 | 11.820069   | -1.836391014 | 0.560760132 | 0.00315162  | SAPCD1        | suppressor APC domain containing 1 [Source:HGNC Symbol;Acc:13938]                                                          |
| 6279 | ENSG00000228727 | 11.81986353 | -1.836356634 | 0.560760482 | 0.003151825 | SAPCD1        | suppressor APC domain containing 1 [Source:HGNC Symbol;Acc:13938]                                                          |
| 6280 | ENSG00000250254 | 66.41724434 | -1.180478719 | 0.360498236 | 0.003153393 | PTTG2         | pituitary tumor-transforming 2 [Source:HGNC Symbol;Acc:9691]                                                               |
| 6281 | ENSG00000124097 | 11.60497051 | -1.833794405 | 0.560131099 | 0.003160814 | HMGB1P1       | high mobility group box 1 pseudogene 1 [Source:HGNC Symbol;Acc:4993]                                                       |
| 6282 | ENSG00000259316 | 16.83999501 | -1.749318833 | 0.534473274 | 0.00317027  | CTD-2116N17.1 | Uncharacterized protein [Source:UniProtKB/TrEMBL;Acc:U3KQA5]                                                               |
| 6283 | ENSG00000268138 | 69.70899788 | 1.154225365  | 0.352719493 | 0.003176688 | PORCN         | porcupine homolog (Drosophila) [Source:HGNC Symbol;Acc:17652]                                                              |
| 6284 | ENSG00000167562 | 419.8836622 | 0.532196981  | 0.162667061 | 0.00318367  | ZNF701        | zinc finger protein 701 [Source:HGNC Symbol;Acc:25597]                                                                     |
| 6285 | ENSG0000005022  | 2035.245923 | -0.267394233 | 0.08173339  | 0.003184882 | SLC25A5       | solute carrier family 25 (mitochondrial carrier; adenine nucleotide translocator), member 5 [Source:HGNC Symbol;Acc:10991] |
| 6286 | ENSG00000102858 | 2867.303062 | -0.371728506 | 0.113652491 | 0.003193346 | MGRN1         | mahogunin ring finger 1, E3 ubiquitin protein ligase [Source:HGNC Symbol;Acc:20254]                                        |
| 6287 | ENSG00000111875 | 381.2655657 | 0.557943646  | 0.170615506 | 0.003199226 | ASF1A         | anti-silencing function 1A histone chaperone [Source:HGNC Symbol;Acc:20995]                                                |
| 6288 | ENSG00000170482 | 63.0448507  | 1.206610496  | 0.368982994 | 0.003199662 | SLC23A1       | solute carrier family 23 (ascorbic acid transporter), member 1 [Source:HGNC Symbol;Acc:10974]                              |
| 6289 | ENSG00000154889 | 3133.423813 | -0.232874057 | 0.071218147 | 0.003201594 | MPPE1         | metallophosphoesterase 1 [Source:HGNC Symbol;Acc:15988]                                                                    |
| 6290 | ENSG00000113360 | 779.2950885 | -0.460279259 | 0.140765193 | 0.003201594 | DROSHA        | drosha, ribonuclease type III [Source:HGNC Symbol;Acc:17904]                                                               |
| 6291 | ENSG00000078808 | 1210.623438 | 0.427235882  | 0.130679001 | 0.003206308 | SDF4          | stromal cell derived factor 4 [Source:HGNC Symbol;Acc:24188]                                                               |
| 6292 | ENSG00000136021 | 1709.88408  | -0.383935841 | 0.117435598 | 0.003206308 | SCYL2         | SCY1-like 2 (S. cerevisiae) [Source:HGNC Symbol;Acc:19286]                                                                 |
| 6293 | ENSG00000168802 | 1853.993588 | 0.274628874  | 0.084011317 | 0.00320962  | CTF8          | CTF8, chromosome transmission fidelity factor 8 homolog (S. cerevisiae) [Source:HGNC Symbol;Acc:24353]                     |
| 6294 | ENSG00000141738 | 5.922685654 | 1.767099676  | 0.540571209 | 0.00320962  | GRB7          | growth factor receptor-bound protein 7 [Source:HGNC Symbol;Acc:4567]                                                       |

|      |                 |             |              |             |             |          |                                                                                                                        |
|------|-----------------|-------------|--------------|-------------|-------------|----------|------------------------------------------------------------------------------------------------------------------------|
| 6295 | ENSG00000255302 | 1409.939632 | 0.309917383  | 0.094820449 | 0.003214595 | EID1     | EP300 interacting inhibitor of differentiation 1 [Source:HGNC Symbol;Acc:1191]                                         |
| 6296 | ENSG00000139053 | 52.8224348  | -1.257638408 | 0.38478952  | 0.003215057 | PDE6H    | phosphodiesterase 6H, cGMP-specific, cone, gamma [Source:HGNC Symbol;Acc:8790]                                         |
| 6297 | ENSG00000211827 | 8.649884612 | 1.849792151  | 0.565989493 | 0.003216085 | TRDJ2    | T cell receptor delta joining 2 [Source:HGNC Symbol;Acc:12258]                                                         |
| 6298 | ENSG00000120458 | 226.8257205 | 0.708003788  | 0.216675614 | 0.003223193 | MSANTD2  | Myb/SANT-like DNA-binding domain containing 2 [Source:HGNC Symbol;Acc:26266]                                           |
| 6299 | ENSG00000135338 | 17.24065672 | -1.754756981 | 0.537035271 | 0.003223656 | LCA5     | Leber congenital amaurosis 5 [Source:HGNC Symbol;Acc:31923]                                                            |
| 6300 | ENSG00000125434 | 223.0838601 | -0.702788412 | 0.215100857 | 0.003225862 | SLC25A35 | solute carrier family 25, member 35 [Source:HGNC Symbol;Acc:31921]                                                     |
| 6301 | ENSG00000141956 | 322.145159  | 0.587551935  | 0.179947044 | 0.003249504 | PRDM15   | PR domain containing 15 [Source:HGNC Symbol;Acc:13999]                                                                 |
| 6302 | ENSG00000161204 | 870.1214589 | 0.408144631  | 0.125048496 | 0.003263325 | ABCF3    | ATP-binding cassette, sub-family F (GCN20), member 3 [Source:HGNC Symbol;Acc:72]                                       |
| 6303 | ENSG00000159267 | 196.7415716 | 0.817719084  | 0.250559169 | 0.00326627  | HLCS     | holocarboxylase synthetase (biotin-(propionyl)-CoA-carboxylase (ATP-hydrolysing)) ligase [Source:HGNC Symbol;Acc:4976] |
| 6304 | ENSG00000237599 | 848.9228637 | 1.285368336  | 0.39385644  | 0.00326627  | TAP2     | transporter 2, ATP-binding cassette, sub-family B (MDR/TAP) [Source:HGNC Symbol;Acc:44]                                |
| 6305 | ENSG00000136158 | 125.5707523 | 0.871909624  | 0.267297545 | 0.003284255 | SPRY2    | sprouty homolog 2 (Drosophila) [Source:HGNC Symbol;Acc:11270]                                                          |
| 6306 | ENSG00000102384 | 88.73816054 | -1.004285062 | 0.307912604 | 0.003287822 | CENPI    | centromere protein I [Source:HGNC Symbol;Acc:3968]                                                                     |
| 6307 | ENSG00000138286 | 645.0289788 | -0.44075142  | 0.135137766 | 0.003288394 | FAM149B1 | family with sequence similarity 149, member B1 [Source:HGNC Symbol;Acc:29162]                                          |
| 6308 | ENSG00000227184 | 18.1325493  | 1.749650388  | 0.53651991  | 0.003292365 | EPPK1    | epiplakin 1 [Source:HGNC Symbol;Acc:15577]                                                                             |
| 6309 | ENSG00000198829 | 293.9456888 | -0.601729136 | 0.184520317 | 0.003292592 | SUCNR1   | succinate receptor 1 [Source:HGNC Symbol;Acc:4542]                                                                     |
| 6310 | ENSG00000111652 | 870.23348   | -0.3845413   | 0.11796633  | 0.003307087 | COPS7A   | COP9 signalosome subunit 7A [Source:HGNC Symbol;Acc:16758]                                                             |
| 6311 | ENSG00000123064 | 380.505189  | 0.611397017  | 0.187604164 | 0.003315681 | DDX54    | DEAD (Asp-Glu-Ala-Asp) box polypeptide 54 [Source:HGNC Symbol;Acc:20084]                                               |
| 6312 | ENSG00000138639 | 927.3928723 | 0.405978638  | 0.124668179 | 0.003344487 | ARHGAP24 | Rho GTPase activating protein 24 [Source:HGNC Symbol;Acc:25361]                                                        |
| 6313 | ENSG00000124207 | 927.6123341 | -0.380164907 | 0.116745954 | 0.003345493 | CSE1L    | CSE1 chromosome segregation 1-like (yeast) [Source:HGNC Symbol;Acc:2431]                                               |
| 6314 | ENSG00000149231 | 1192.186508 | 0.372371496  | 0.11435602  | 0.003346093 | CCDC82   | coiled-coil domain containing 82 [Source:HGNC Symbol;Acc:26282]                                                        |
| 6315 | ENSG00000248098 | 541.0856166 | -0.507924655 | 0.156024373 | 0.003355343 | BCKDHA   | branched chain keto acid dehydrogenase E1, alpha polypeptide [Source:HGNC Symbol;Acc:986]                              |
| 6316 | ENSG00000198440 | 98.66341674 | 1.109577383  | 0.340939584 | 0.003366045 | ZNF583   | zinc finger protein 583 [Source:HGNC Symbol;Acc:26427]                                                                 |
| 6317 | ENSG00000110274 | 725.4653352 | 0.455722518  | 0.140038562 | 0.003367939 | CEP164   | centrosomal protein 164kDa [Source:HGNC Symbol;Acc:29182]                                                              |
| 6318 | ENSG00000172653 | 22.69433512 | 1.661227371  | 0.510518264 | 0.003370521 | C17orf66 | chromosome 17 open reading frame 66 [Source:HGNC Symbol;Acc:26548]                                                     |
| 6319 | ENSG00000173020 | 10727.81346 | -0.257195528 | 0.079051988 | 0.003375962 | ADRBK1   | adrenergic, beta, receptor kinase 1 [Source:HGNC Symbol;Acc:289]                                                       |
| 6320 | ENSG00000113555 | 147.7716593 | -0.865916271 | 0.266178465 | 0.00337967  | PCDH12   | protocadherin 12 [Source:HGNC Symbol;Acc:8657]                                                                         |
| 6321 | ENSG00000138069 | 2243.971707 | -0.252914358 | 0.077755596 | 0.003384587 | RAB1A    | RAB1A, member RAS oncogene family [Source:HGNC Symbol;Acc:9758]                                                        |
| 6322 | ENSG00000025708 | 1656.489617 | 0.305847202  | 0.094043939 | 0.00338993  | TYMP     | thymidine phosphorylase [Source:HGNC Symbol;Acc:3148]                                                                  |



|      |                 |             |              |             |             |             |                                                                                                    |
|------|-----------------|-------------|--------------|-------------|-------------|-------------|----------------------------------------------------------------------------------------------------|
| 6323 | ENSG00000174586 | 76.22486992 | 1.110192063  | 0.341372205 | 0.00338993  | ZNF497      | zinc finger protein 497 [Source:HGNC Symbol;Acc:23714]                                             |
| 6324 | ENSG00000125247 | 170.3355293 | 0.840922359  | 0.2585821   | 0.003390512 | TMTC4       | transmembrane and tetratricopeptide repeat containing 4 [Source:HGNC Symbol;Acc:25904]             |
| 6325 | ENSG00000185869 | 114.0708542 | 0.982697546  | 0.30222577  | 0.003396149 | ZNF829      | zinc finger protein 829 [Source:HGNC Symbol;Acc:34032]                                             |
| 6326 | ENSG00000143093 | 1095.369025 | 0.381576925  | 0.117396897 | 0.003410206 | STRIP1      | striatin interacting protein 1 [Source:HGNC Symbol;Acc:25916]                                      |
| 6327 | ENSG00000146410 | 75.48046965 | -1.072408968 | 0.329977041 | 0.003414046 | MTFR2       | mitochondrial fission regulator 2 [Source:HGNC Symbol;Acc:21115]                                   |
| 6328 | ENSG00000237333 | 57.99320861 | -1.192105013 | 0.366985761 | 0.00343209  | MSH5        | mutS homolog 5 [Source:HGNC Symbol;Acc:7328]                                                       |
| 6329 | ENSG00000124098 | 846.7677357 | 0.360648808  | 0.111024854 | 0.00343209  | FAM210B     | family with sequence similarity 210, member B [Source:HGNC Symbol;Acc:16102]                       |
| 6330 | ENSG00000185339 | 39.62073706 | 1.446288579  | 0.445341383 | 0.003440795 | TCN2        | transcobalamin II [Source:HGNC Symbol;Acc:11653]                                                   |
| 6331 | ENSG00000214013 | 525.7325642 | -0.494146663 | 0.152176462 | 0.003445092 | GANC        | glucosidase, alpha; neutral C [Source:HGNC Symbol;Acc:4139]                                        |
| 6332 | ENSG00000101246 | 459.3875067 | 0.530878392  | 0.163495097 | 0.003446184 | ARFRP1      | ADP-ribosylation factor related protein 1 [Source:HGNC Symbol;Acc:662]                             |
| 6333 | ENSG00000182551 | 1452.97114  | -0.319295282 | 0.098343947 | 0.003449755 | ADI1        | acireductone dioxygenase 1 [Source:HGNC Symbol;Acc:30576]                                          |
| 6334 | ENSG00000112782 | 24.8606451  | 1.664192418  | 0.51261543  | 0.003452202 | CLIC5       | chloride intracellular channel 5 [Source:HGNC Symbol;Acc:13517]                                    |
| 6335 | ENSG00000091947 | 310.5546117 | 0.595073001  | 0.183393302 | 0.00347211  | TMEM101     | transmembrane protein 101 [Source:HGNC Symbol;Acc:28653]                                           |
| 6336 | ENSG00000262506 | 277.6711176 | 0.652579901  | 0.201125396 | 0.00347316  | C11orf57    | chromosome 11 open reading frame 57 [Source:HGNC Symbol;Acc:25569]                                 |
| 6337 | ENSG00000150776 | 277.6714324 | 0.652587505  | 0.201129386 | 0.00347316  | C11orf57    | chromosome 11 open reading frame 57 [Source:HGNC Symbol;Acc:25569]                                 |
| 6338 | ENSG00000243207 | 19.4916911  | 1.693065574  | 0.522144756 | 0.003498231 | PPAN-P2RY11 | PPAN-P2RY11 readthrough [Source:HGNC Symbol;Acc:33526]                                             |
| 6339 | ENSG00000131653 | 812.9927292 | -0.456554835 | 0.140814269 | 0.003501033 | TRAF7       | TNF receptor-associated factor 7, E3 ubiquitin protein ligase [Source:HGNC Symbol;Acc:20456]       |
| 6340 | ENSG00000111711 | 620.7017519 | 0.446870934  | 0.137848675 | 0.003506608 | GOLT1B      | golgi transport 1B [Source:HGNC Symbol;Acc:20175]                                                  |
| 6341 | ENSG00000107890 | 123.1911846 | 0.947184916  | 0.292190986 | 0.003507116 | ANKRD26     | ankyrin repeat domain 26 [Source:HGNC Symbol;Acc:29186]                                            |
| 6342 | ENSG00000198380 | 572.0264749 | -0.50325765  | 0.155265199 | 0.003511314 | GFPT1       | glutamine--fructose-6-phosphate transaminase 1 [Source:HGNC Symbol;Acc:4241]                       |
| 6343 | ENSG00000134758 | 1067.019159 | -0.339765005 | 0.104872747 | 0.00352875  | RNF138      | ring finger protein 138, E3 ubiquitin protein ligase [Source:HGNC Symbol;Acc:17765]                |
| 6344 | ENSG00000211791 | 25.09165157 | 1.639563455  | 0.50607314  | 0.00352875  | TRAV13-2    | T cell receptor alpha variable 13-2 [Source:HGNC Symbol;Acc:12109]                                 |
| 6345 | ENSG00000196793 | 22.54404322 | 1.65386894   | 0.510525456 | 0.003530821 | ZNF239      | zinc finger protein 239 [Source:HGNC Symbol;Acc:13031]                                             |
| 6346 | ENSG00000214076 | 7.766328207 | -1.824159047 | 0.563095732 | 0.003530821 | CPSF1P1     | cleavage and polyadenylation specific factor 1, 160kDa pseudogene 1 [Source:HGNC Symbol;Acc:19251] |
| 6347 | ENSG00000129493 | 902.5932971 | -0.355519688 | 0.109751828 | 0.003532904 | HEATR5A     | HEAT repeat containing 5A [Source:HGNC Symbol;Acc:20276]                                           |
| 6348 | ENSG00000197879 | 155.2935661 | 0.812946141  | 0.250980831 | 0.003535182 | MYO1C       | myosin IC [Source:HGNC Symbol;Acc:7597]                                                            |
| 6349 | ENSG00000164211 | 519.2316307 | 0.448385477  | 0.138460696 | 0.003543526 | STAR4       | StAR-related lipid transfer (START) domain containing 4 [Source:HGNC Symbol;Acc:18058]             |
| 6350 | ENSG00000205937 | 1659.205753 | 0.274385342  | 0.084738689 | 0.003547217 | RNPS1       | RNA binding protein S1, serine-rich domain [Source:HGNC Symbol;Acc:10080]                          |

|      |                 |             |              |             |             |               |                                                                                                                        |
|------|-----------------|-------------|--------------|-------------|-------------|---------------|------------------------------------------------------------------------------------------------------------------------|
| 6351 | ENSG00000169926 | 7103.422482 | 0.193872087  | 0.059887416 | 0.003555371 | KLF13         | Kruppel-like factor 13 [Source:HGNC Symbol;Acc:13672]                                                                  |
| 6352 | ENSG00000106771 | 823.8410239 | 0.413962118  | 0.127873739 | 0.003555371 | TMEM245       | transmembrane protein 245 [Source:HGNC Symbol;Acc:1363]                                                                |
| 6353 | ENSG00000116016 | 165.2582847 | -0.802495116 | 0.248075929 | 0.003584768 | EPAS1         | endothelial PAS domain protein 1 [Source:HGNC Symbol;Acc:3374]                                                         |
| 6354 | ENSG00000157895 | 275.4905727 | 0.64078962   | 0.198104576 | 0.003587647 | C12orf43      | chromosome 12 open reading frame 43 [Source:HGNC Symbol;Acc:25719]                                                     |
| 6355 | ENSG00000128694 | 158.8969638 | 0.831924634  | 0.25721996  | 0.003590691 | OSGEPL1       | O-sialoglycoprotein endopeptidase-like 1 [Source:HGNC Symbol;Acc:23075]                                                |
| 6356 | ENSG00000269404 | 198.7076591 | 0.713189714  | 0.22051021  | 0.003590691 | SPIB          | Spi-B transcription factor (Spi-1/PU.1 related) [Source:HGNC Symbol;Acc:11242]                                         |
| 6357 | ENSG00000086300 | 2493.085611 | -0.284890863 | 0.088105599 | 0.003599626 | SNX10         | sorting nexin 10 [Source:HGNC Symbol;Acc:14974]                                                                        |
| 6358 | ENSG00000235674 | 42.14065914 | -1.379842726 | 0.426826226 | 0.003608124 | LDHAP2        | lactate dehydrogenase A pseudogene 2 [Source:HGNC Symbol;Acc:6537]                                                     |
| 6359 | ENSG00000136044 | 1474.141193 | -0.316159267 | 0.097799974 | 0.003608621 | APPL2         | adaptor protein, phosphotyrosine interaction, PH domain and leucine zipper containing 2 [Source:HGNC Symbol;Acc:18242] |
| 6360 | ENSG00000198416 | 51.72069807 | 1.327620373  | 0.410811504 | 0.003620844 | CTD-2173L22.4 |                                                                                                                        |
| 6361 | ENSG00000132122 | 87.6112388  | 1.133114339  | 0.350658773 | 0.003624263 | SPATA6        | spermatogenesis associated 6 [Source:HGNC Symbol;Acc:18309]                                                            |
| 6362 | ENSG00000260908 | 29.75484238 | -1.532883547 | 0.474446472 | 0.003629999 | CTB-134H23.3  |                                                                                                                        |
| 6363 | ENSG00000114541 | 751.130249  | -0.389286355 | 0.120490551 | 0.003629999 | FRMD4B        | FERM domain containing 4B [Source:HGNC Symbol;Acc:24886]                                                               |
| 6364 | ENSG00000159640 | 58.55225971 | 1.293828072  | 0.400508459 | 0.003634279 | ACE           | angiotensin I converting enzyme [Source:HGNC Symbol;Acc:2707]                                                          |
| 6365 | ENSG00000087206 | 1774.482664 | 0.271881017  | 0.084181158 | 0.003643257 | UIMC1         | ubiquitin interaction motif containing 1 [Source:HGNC Symbol;Acc:30298]                                                |
| 6366 | ENSG00000143387 | 262.8053501 | -0.61849918  | 0.191544336 | 0.003651616 | CTSK          | cathepsin K [Source:HGNC Symbol;Acc:2536]                                                                              |
| 6367 | ENSG00000240204 | 15.03017742 | 1.809444094  | 0.560551511 | 0.003664061 | SMKR1         | small lysine-rich protein 1 [Source:HGNC Symbol;Acc:43561]                                                             |
| 6368 | ENSG00000132017 | 709.4467079 | 0.482232465  | 0.149392783 | 0.003664061 | DCAF15        | DDB1 and CUL4 associated factor 15 [Source:HGNC Symbol;Acc:25095]                                                      |
| 6369 | ENSG00000101000 | 23.80746265 | 1.626262833  | 0.503854602 | 0.003667421 | PROCR         | protein C receptor, endothelial [Source:HGNC Symbol;Acc:9452]                                                          |
| 6370 | ENSG00000126351 | 1062.08332  | -0.334163809 | 0.103540771 | 0.003670417 | THRA          | thyroid hormone receptor, alpha [Source:HGNC Symbol;Acc:11796]                                                         |
| 6371 | ENSG00000082996 | 2335.362154 | 0.266363372  | 0.082545066 | 0.003676007 | RNF13         | ring finger protein 13 [Source:HGNC Symbol;Acc:10057]                                                                  |
| 6372 | ENSG00000070950 | 348.041251  | -0.587537898 | 0.182083249 | 0.0036771   | RAD18         | RAD18 homolog (S. cerevisiae) [Source:HGNC Symbol;Acc:18278]                                                           |
| 6373 | ENSG00000131238 | 7174.718504 | 0.191190464  | 0.059263011 | 0.003684489 | PPT1          | palmitoyl-protein thioesterase 1 [Source:HGNC Symbol;Acc:9325]                                                         |
| 6374 | ENSG00000073803 | 232.8341685 | -0.648450943 | 0.201036614 | 0.003691619 | MAP3K13       | mitogen-activated protein kinase kinase kinase 13 [Source:HGNC Symbol;Acc:6852]                                        |
| 6375 | ENSG00000100003 | 41.92232539 | -1.407624284 | 0.43647577  | 0.003698263 | SEC14L2       | SEC14-like 2 (S. cerevisiae) [Source:HGNC Symbol;Acc:10699]                                                            |
| 6376 | ENSG00000179163 | 694.9530178 | 0.414067436  | 0.128397868 | 0.003698963 | FUCA1         | fucosidase, alpha-L- 1, tissue [Source:HGNC Symbol;Acc:4006]                                                           |
| 6377 | ENSG00000211652 | 30.37999755 | 1.503618675  | 0.466269561 | 0.003699594 | IGLV7-43      | immunoglobulin lambda variable 7-43 [Source:HGNC Symbol;Acc:5929]                                                      |
| 6378 | ENSG00000177590 | 14.56625627 | 1.790200622  | 0.555242463 | 0.00370685  | RP5-1051J4.6  |                                                                                                                        |

|      |                 |             |              |             |             |          |                                                                                    |
|------|-----------------|-------------|--------------|-------------|-------------|----------|------------------------------------------------------------------------------------|
| 6379 | ENSG00000132589 | 8314.078086 | -0.163378014 | 0.050674901 | 0.00370803  | FLOT2    | flotillin 2 [Source:HGNC Symbol;Acc:3758]                                          |
| 6380 | ENSG00000124233 | 38.0288618  | -1.400174324 | 0.434312984 | 0.003709296 | SEMGL1   | semenogelin I [Source:HGNC Symbol;Acc:10742]                                       |
| 6381 | ENSG00000179820 | 7560.228614 | 0.187776033  | 0.058245813 | 0.003709296 | MYADM    | myeloid-associated differentiation marker [Source:HGNC Symbol;Acc:7544]            |
| 6382 | ENSG00000226742 | 187.9258697 | 0.746309065  | 0.231580058 | 0.003723919 | HSPB1L1  | heat shock factor binding protein 1-like 1 [Source:HGNC Symbol;Acc:37243]          |
| 6383 | ENSG00000141627 | 538.2654184 | -0.459324262 | 0.142538153 | 0.003726163 | DYM      | dymeclin [Source:HGNC Symbol;Acc:21317]                                            |
| 6384 | ENSG00000270379 | 22.56975137 | 1.647180638  | 0.511196131 | 0.003728918 | C17orf66 | chromosome 17 open reading frame 66 [Source:HGNC Symbol;Acc:26548]                 |
| 6385 | ENSG00000198919 | 379.2856521 | 0.525175855  | 0.163035145 | 0.003740918 | DZIP3    | DAZ interacting zinc finger protein 3 [Source:HGNC Symbol;Acc:30938]               |
| 6386 | ENSG00000146776 | 456.1582385 | -0.529235445 | 0.164322704 | 0.003747324 | ATXN7L1  | ataxin 7-like 1 [Source:HGNC Symbol;Acc:22210]                                     |
| 6387 | ENSG00000103175 | 42.30012599 | -1.360304612 | 0.422505624 | 0.003761076 | WFDC1    | WAP four-disulfide core domain 1 [Source:HGNC Symbol;Acc:15466]                    |
| 6388 | ENSG00000084463 | 1149.437878 | 0.326975621  | 0.101570756 | 0.003766032 | WBP11    | WW domain binding protein 11 [Source:HGNC Symbol;Acc:16461]                        |
| 6389 | ENSG00000135045 | 143.2316255 | -0.854196656 | 0.265353573 | 0.003766782 | C9orf40  | chromosome 9 open reading frame 40 [Source:HGNC Symbol;Acc:23433]                  |
| 6390 | ENSG00000172493 | 2746.940352 | -0.245171356 | 0.076165122 | 0.003768076 | AFF1     | AF4/FMR2 family, member 1 [Source:HGNC Symbol;Acc:7135]                            |
| 6391 | ENSG00000169592 | 1210.949954 | 0.473641764  | 0.147155295 | 0.003771334 | INO80E   | INO80 complex subunit E [Source:HGNC Symbol;Acc:26905]                             |
| 6392 | ENSG00000182796 | 699.9239234 | 0.395194993  | 0.122833615 | 0.003788308 | TMEM198B | transmembrane protein 198B, pseudogene [Source:HGNC Symbol;Acc:43629]              |
| 6393 | ENSG00000239605 | 31.83320309 | 1.450043904  | 0.4511859   | 0.003833779 | C2orf61  | chromosome 2 open reading frame 61 [Source:HGNC Symbol;Acc:26850]                  |
| 6394 | ENSG00000141622 | 143.3517351 | 0.939733159  | 0.29243556  | 0.003838246 | RNF165   | ring finger protein 165 [Source:HGNC Symbol;Acc:31696]                             |
| 6395 | ENSG00000248527 | 7442.244634 | 0.181326689  | 0.056431104 | 0.003840731 | MTATP6P1 | mitochondrially encoded ATP synthase 6 pseudogene 1 [Source:HGNC Symbol;Acc:44575] |
| 6396 | ENSG00000256646 | 742.3170342 | -0.391248407 | 0.121763865 | 0.003841023 | PSMA2    | Proteasome subunit alpha type-2 [Source:UniProtKB/TrEMBL;Acc:H3BT36]               |
| 6397 | ENSG00000137955 | 1361.193587 | 0.307179284  | 0.095611817 | 0.003845749 | RABGGTB  | Rab geranylgeranyltransferase, beta subunit [Source:HGNC Symbol;Acc:9796]          |
| 6398 | ENSG00000187726 | 88.63740507 | 1.004656898  | 0.312759766 | 0.003852428 | DNAJB13  | DnaJ (Hsp40) homolog, subfamily B, member 13 [Source:HGNC Symbol;Acc:30718]        |
| 6399 | ENSG00000104626 | 386.2801839 | -0.523739637 | 0.16306872  | 0.00385799  | ERI1     | exoribonuclease 1 [Source:HGNC Symbol;Acc:23994]                                   |
| 6400 | ENSG00000140575 | 15152.78178 | -0.177796795 | 0.055371405 | 0.003867963 | IQGAP1   | IQ motif containing GTPase activating protein 1 [Source:HGNC Symbol;Acc:6110]      |
| 6401 | ENSG00000011465 | 28.53616395 | -1.51322874  | 0.471377756 | 0.003877608 | DCN      | decorin [Source:HGNC Symbol;Acc:2705]                                              |
| 6402 | ENSG00000211814 | 12.6049658  | 1.801939098  | 0.561401073 | 0.00388385  | TRAV35   | T cell receptor alpha variable 35 [Source:HGNC Symbol;Acc:12134]                   |
| 6403 | ENSG00000054392 | 44.54533445 | 1.332925137  | 0.415505815 | 0.003907087 | HHAT     | hedgehog acyltransferase [Source:HGNC Symbol;Acc:18270]                            |
| 6404 | ENSG00000105849 | 223.4117368 | 0.832366134  | 0.25948712  | 0.003909494 | TWISTNB  | TWIST neighbor [Source:HGNC Symbol;Acc:18027]                                      |
| 6405 | ENSG00000112514 | 611.6588415 | 0.436636842  | 0.136156996 | 0.003920251 | CUTA     | cutA divalent cation tolerance homolog (E. coli) [Source:HGNC Symbol;Acc:21101]    |
| 6406 | ENSG00000152804 | 1517.705381 | -0.294021257 | 0.091685218 | 0.003920251 | HHEX     | hematopoietically expressed homeobox [Source:HGNC Symbol;Acc:4901]                 |

|      |                 |             |              |             |             |             |                                                                                                                            |
|------|-----------------|-------------|--------------|-------------|-------------|-------------|----------------------------------------------------------------------------------------------------------------------------|
| 6407 | ENSG00000173406 | 13.79041766 | 1.782803684  | 0.555999512 | 0.003924702 | DAB1        | Dab, reelin signal transducer, homolog 1 (Drosophila) [Source:HGNC Symbol;Acc:2661]                                        |
| 6408 | ENSG00000180957 | 1030.416763 | 0.347156644  | 0.108272695 | 0.003926363 | PITPNB      | phosphatidylinositol transfer protein, beta [Source:HGNC Symbol;Acc:9002]                                                  |
| 6409 | ENSG00000068885 | 654.367199  | 0.447020677  | 0.139423427 | 0.003927229 | IFT80       | intraflagellar transport 80 homolog (Chlamydomonas) [Source:HGNC Symbol;Acc:29262]                                         |
| 6410 | ENSG00000187164 | 125.9252176 | -0.901751932 | 0.281267487 | 0.003929066 | KIAA1598    | KIAA1598 [Source:HGNC Symbol;Acc:29319]                                                                                    |
| 6411 | ENSG00000129351 | 4971.116822 | 0.217167918  | 0.067739698 | 0.003929789 | ILF3        | interleukin enhancer binding factor 3, 90kDa [Source:HGNC Symbol;Acc:6038]                                                 |
| 6412 | ENSG00000167685 | 307.3353635 | 0.683609257  | 0.213235601 | 0.003929789 | ZNF444      | zinc finger protein 444 [Source:HGNC Symbol;Acc:16052]                                                                     |
| 6413 | ENSG00000240038 | 1255.613593 | 0.333913291  | 0.10415793  | 0.003929867 | AMY2B       | amylase, alpha 2B (pancreatic) [Source:HGNC Symbol;Acc:478]                                                                |
| 6414 | ENSG00000100116 | 48.45816056 | -1.268520445 | 0.395697485 | 0.003929978 | GCAT        | glycine C-acetyltransferase [Source:HGNC Symbol;Acc:4188]                                                                  |
| 6415 | ENSG00000168887 | 1737.385604 | -0.285800085 | 0.089153418 | 0.003930356 | C2orf68     | chromosome 2 open reading frame 68 [Source:HGNC Symbol;Acc:34353]                                                          |
| 6416 | ENSG00000184261 | 13.19802431 | 1.778840529  | 0.555080497 | 0.003944211 | KCNK12      | potassium channel, subfamily K, member 12 [Source:HGNC Symbol;Acc:6274]                                                    |
| 6417 | ENSG00000231631 | 334.8107069 | 0.758696993  | 0.236782645 | 0.003949924 | PSMB8       | proteasome (prosome, macropain) subunit, beta type, 8 [Source:HGNC Symbol;Acc:9545]                                        |
| 6418 | ENSG00000100784 | 596.7809068 | -0.439271714 | 0.137148078 | 0.003967052 | RPS6KA5     | ribosomal protein S6 kinase, 90kDa, polypeptide 5 [Source:HGNC Symbol;Acc:10434]                                           |
| 6419 | ENSG00000135677 | 3263.378571 | -0.223057253 | 0.069645269 | 0.003968342 | GNS         | glucosamine (N-acetyl)-6-sulfatase [Source:HGNC Symbol;Acc:4422]                                                           |
| 6420 | ENSG00000122378 | 61.63601805 | 1.186961486  | 0.370709308 | 0.003980093 | FAM213A     | family with sequence similarity 213, member A [Source:HGNC Symbol;Acc:28651]                                               |
| 6421 | ENSG00000070756 | 18704.5438  | 0.152998862  | 0.047787987 | 0.003982904 | PABPC1      | poly(A) binding protein, cytoplasmic 1 [Source:HGNC Symbol;Acc:8554]                                                       |
| 6422 | ENSG00000184206 | 260.574636  | -0.775691494 | 0.242305718 | 0.00398678  | GOLGA6L4    | golgin A6 family-like 4 [Source:HGNC Symbol;Acc:27256]                                                                     |
| 6423 | ENSG00000211803 | 24.09143266 | 1.630660767  | 0.509423889 | 0.003990347 | TRAV23DV6   | T cell receptor alpha variable 23/delta variable 6 [Source:HGNC Symbol;Acc:12120]                                          |
| 6424 | ENSG00000127804 | 443.3945474 | 0.549136596  | 0.171654089 | 0.004016137 | METTL16     | methyltransferase like 16 [Source:HGNC Symbol;Acc:28484]                                                                   |
| 6425 | ENSG00000212884 | 20.5814203  | 1.644401764  | 0.514183393 | 0.004029522 | AC011841.1  | cDNA FLJ34843 fis, clone NT2NE2011119, highly similar to C-TERMINAL BINDING PROTEIN 2 [Source:UniProtKB/TrEMBL;Acc:Q8NAS8] |
| 6426 | ENSG00000137054 | 225.3985592 | 0.66456842   | 0.207874781 | 0.004044558 | POLR1E      | polymerase (RNA) I polypeptide E, 53kDa [Source:HGNC Symbol;Acc:17631]                                                     |
| 6427 | ENSG00000100968 | 9.387610622 | -1.808461681 | 0.565886036 | 0.004060216 | NFATC4      | nuclear factor of activated T-cells, cytoplasmic, calcineurin-dependent 4 [Source:HGNC Symbol;Acc:7778]                    |
| 6428 | ENSG00000266405 | 51.94462655 | 1.334354389  | 0.417548705 | 0.004060841 | CBX3P2      | chromobox homolog 3 pseudogene 2 [Source:HGNC Symbol;Acc:42874]                                                            |
| 6429 | ENSG00000163249 | 491.3319151 | -0.630701231 | 0.197361113 | 0.004060841 | CCNYL1      | cyclin Y-like 1 [Source:HGNC Symbol;Acc:26868]                                                                             |
| 6430 | ENSG00000089195 | 426.7266261 | -0.50373769  | 0.157681059 | 0.004074433 | TRMT6       | tRNA methyltransferase 6 homolog (S. cerevisiae) [Source:HGNC Symbol;Acc:20900]                                            |
| 6431 | ENSG00000120029 | 769.890431  | -0.39579945  | 0.123898213 | 0.004075334 | C10orf76    | chromosome 10 open reading frame 76 [Source:HGNC Symbol;Acc:25788]                                                         |
| 6432 | ENSG00000181029 | 179.7285622 | 0.820490195  | 0.256852326 | 0.004076803 | TRAPPC5     | trafficking protein particle complex 5 [Source:HGNC Symbol;Acc:23067]                                                      |
| 6433 | ENSG00000187905 | 77.99836093 | -1.08746161  | 0.340466544 | 0.004081407 | AC002472.13 | Leucine-rich repeat-containing protein LOC400891 [Source:UniProtKB/Swiss-Prot;Acc:Q6ZQY2]                                  |
| 6434 | ENSG00000163923 | 80.28124195 | -1.02748587  | 0.321787454 | 0.004094008 | RPL39L      | ribosomal protein L39-like [Source:HGNC Symbol;Acc:17094]                                                                  |

|      |                 |             |              |             |             |          |                                                                                                   |
|------|-----------------|-------------|--------------|-------------|-------------|----------|---------------------------------------------------------------------------------------------------|
| 6435 | ENSG00000092036 | 967.9715976 | -0.341512107 | 0.106954694 | 0.004094008 | HAUS4    | HAUS augmin-like complex, subunit 4 [Source:HGNC Symbol;Acc:20163]                                |
| 6436 | ENSG00000187626 | 259.6774844 | 0.708806271  | 0.221994594 | 0.004095572 | ZKSCAN4  | zinc finger with KRAB and SCAN domains 4 [Source:HGNC Symbol;Acc:13854]                           |
| 6437 | ENSG00000183864 | 820.1971113 | 0.382743878  | 0.11994549  | 0.004122203 | TOB2     | transducer of ERBB2, 2 [Source:HGNC Symbol;Acc:11980]                                             |
| 6438 | ENSG00000122778 | 533.1396883 | 0.492415153  | 0.154317786 | 0.004122496 | KIAA1549 | KIAA1549 [Source:HGNC Symbol;Acc:22219]                                                           |
| 6439 | ENSG00000149474 | 243.0012147 | 0.658622343  | 0.206448133 | 0.004131129 | CSRP2BP  | CSRP2 binding protein [Source:HGNC Symbol;Acc:15904]                                              |
| 6440 | ENSG00000180539 | 458.7420058 | -0.553254561 | 0.173432409 | 0.004133879 | C9orf139 | chromosome 9 open reading frame 139 [Source:HGNC Symbol;Acc:31426]                                |
| 6441 | ENSG00000081665 | 799.8510035 | 0.408166094  | 0.127969117 | 0.004139859 | ZNF506   | zinc finger protein 506 [Source:HGNC Symbol;Acc:23780]                                            |
| 6442 | ENSG00000205593 | 72.50198646 | 1.249217696  | 0.39169266  | 0.004143326 | DENND6B  | DENN/MADD domain containing 6B [Source:HGNC Symbol;Acc:32690]                                     |
| 6443 | ENSG00000113328 | 985.9413291 | 0.399804728  | 0.125368635 | 0.004146228 | CCNG1    | cyclin G1 [Source:HGNC Symbol;Acc:1592]                                                           |
| 6444 | ENSG00000204764 | 75.19670426 | -1.101330585 | 0.345389423 | 0.004150891 | RANBP17  | RAN binding protein 17 [Source:HGNC Symbol;Acc:14428]                                             |
| 6445 | ENSG00000088888 | 773.9790014 | -0.372667181 | 0.116881479 | 0.004153749 | MAVS     | mitochondrial antiviral signaling protein [Source:HGNC Symbol;Acc:29233]                          |
| 6446 | ENSG00000172578 | 1595.005429 | -0.294735926 | 0.092444921 | 0.004155787 | KLHL6    | kelch-like family member 6 [Source:HGNC Symbol;Acc:18653]                                         |
| 6447 | ENSG00000179361 | 1468.698525 | -0.338663701 | 0.106235265 | 0.004160428 | ARID3B   | AT rich interactive domain 3B (BRIGHT-like) [Source:HGNC Symbol;Acc:14350]                        |
| 6448 | ENSG00000103024 | 80.97055134 | 1.121867525  | 0.351936191 | 0.004162138 | NME3     | NME/NM23 nucleoside diphosphate kinase 3 [Source:HGNC Symbol;Acc:7851]                            |
| 6449 | ENSG00000164933 | 299.8777807 | 0.635571079  | 0.199401007 | 0.004165532 | SLC25A32 | solute carrier family 25 (mitochondrial folate carrier), member 32 [Source:HGNC Symbol;Acc:29683] |
| 6450 | ENSG00000166197 | 1072.334436 | 0.356314194  | 0.11178919  | 0.004165532 | NOLC1    | nucleolar and coiled-body phosphoprotein 1 [Source:HGNC Symbol;Acc:15608]                         |
| 6451 | ENSG00000164733 | 2415.447612 | 0.273039711  | 0.085685183 | 0.004176868 | CTSB     | cathepsin B [Source:HGNC Symbol;Acc:2527]                                                         |
| 6452 | ENSG00000188811 | 976.9610542 | -0.344411643 | 0.108085756 | 0.004177357 | NHLRC3   | NHL repeat containing 3 [Source:HGNC Symbol;Acc:33751]                                            |
| 6453 | ENSG00000183496 | 24.82504541 | -1.562107919 | 0.490277428 | 0.004180973 | MEX3B    | mex-3 RNA binding family member B [Source:HGNC Symbol;Acc:25297]                                  |
| 6454 | ENSG00000230791 | 64.76425709 | -1.132462255 | 0.355636388 | 0.004207067 | LST1     | leukocyte specific transcript 1 [Source:HGNC Symbol;Acc:14189]                                    |
| 6455 | ENSG00000235915 | 64.7638864  | -1.132170907 | 0.355656244 | 0.004220927 | LST1     | leukocyte specific transcript 1 [Source:HGNC Symbol;Acc:14189]                                    |
| 6456 | ENSG00000006118 | 22.37727613 | -1.627512048 | 0.511338361 | 0.0042273   | TMEM132A | transmembrane protein 132A [Source:HGNC Symbol;Acc:31092]                                         |
| 6457 | ENSG00000261110 | 33.09406196 | 1.471976288  | 0.462728326 | 0.004252504 | TRBV27   | T cell receptor beta variable 27 [Source:HGNC Symbol;Acc:12208]                                   |
| 6458 | ENSG00000143322 | 463.9466982 | 0.57459724   | 0.180695708 | 0.004268326 | ABL2     | c-abl oncogene 2, non-receptor tyrosine kinase [Source:HGNC Symbol;Acc:77]                        |
| 6459 | ENSG00000142794 | 111.9572186 | 0.954518869  | 0.30017117  | 0.004268326 | NBPF3    | neuroblastoma breakpoint family, member 3 [Source:HGNC Symbol;Acc:25076]                          |
| 6460 | ENSG00000123473 | 185.7444647 | -0.841452872 | 0.264651945 | 0.004274229 | STIL     | SCL/TAL1 interrupting locus [Source:HGNC Symbol;Acc:10879]                                        |
| 6461 | ENSG00000154134 | 69.03016328 | 1.13643647   | 0.357536664 | 0.00428744  | ROBO3    | roundabout, axon guidance receptor, homolog 3 (Drosophila) [Source:HGNC Symbol;Acc:13433]         |
| 6462 | ENSG00000176022 | 106.4478823 | 0.920953188  | 0.28974711  | 0.00428744  | B3GALT6  | UDP-Gal:betaGal beta 1,3-galactosyltransferase polypeptide 6 [Source:HGNC Symbol;Acc:17978]       |

|      |                 |             |              |             |             |               |                                                                                                                                    |
|------|-----------------|-------------|--------------|-------------|-------------|---------------|------------------------------------------------------------------------------------------------------------------------------------|
| 6463 | ENSG00000153107 | 1102.367221 | 0.332766355  | 0.104694844 | 0.00428744  | ANAPC1        | anaphase promoting complex subunit 1 [Source:HGNC Symbol;Acc:19988]                                                                |
| 6464 | ENSG00000197430 | 11.99007488 | 1.793558981  | 0.564304695 | 0.004288088 | OPALIN        | oligodendrocytic myelin paranodal and inner loop protein [Source:HGNC Symbol;Acc:20707]                                            |
| 6465 | ENSG00000153246 | 34.96539801 | 1.429614721  | 0.449805367 | 0.00428825  | PLA2R1        | phospholipase A2 receptor 1, 180kDa [Source:HGNC Symbol;Acc:9042]                                                                  |
| 6466 | ENSG00000198169 | 335.904767  | 0.567280293  | 0.178488512 | 0.004288339 | ZNF251        | zinc finger protein 251 [Source:HGNC Symbol;Acc:13045]                                                                             |
| 6467 | ENSG00000156976 | 9370.212562 | 0.184701404  | 0.058132756 | 0.004302649 | EIF4A2        | eukaryotic translation initiation factor 4A2 [Source:HGNC Symbol;Acc:3284]                                                         |
| 6468 | ENSG00000182472 | 64.88629756 | 1.158245464  | 0.364587771 | 0.004307497 | CAPN12        | calpain 12 [Source:HGNC Symbol;Acc:13249]                                                                                          |
| 6469 | ENSG00000196275 | 633.3705889 | -0.421531438 | 0.132699055 | 0.004310783 | GTF2IRD2      | GTF2I repeat domain containing 2 [Source:HGNC Symbol;Acc:30775]                                                                    |
| 6470 | ENSG00000250687 | 195.782922  | 0.792608855  | 0.249573266 | 0.004321137 | RP11-497H16.7 |                                                                                                                                    |
| 6471 | ENSG00000144048 | 416.1901016 | 0.519158204  | 0.163510797 | 0.004332198 | DUSP11        | dual specificity phosphatase 11 (RNA/RNP complex 1-interacting) [Source:HGNC Symbol;Acc:3066]                                      |
| 6472 | ENSG00000237075 | 113.6753298 | 1.009176855  | 0.317916865 | 0.004342406 | RP11-497H16.2 |                                                                                                                                    |
| 6473 | ENSG00000139890 | 610.705611  | 0.434298339  | 0.136828642 | 0.004346392 | REM2          | RAS (RAD and GEM)-like GTP binding 2 [Source:HGNC Symbol;Acc:20248]                                                                |
| 6474 | ENSG00000260266 | 154.3308084 | -0.82135786  | 0.258797837 | 0.004350031 | CTD-2311M21.2 |                                                                                                                                    |
| 6475 | ENSG00000104774 | 3263.406127 | -0.307579114 | 0.096953466 | 0.004368916 | MAN2B1        | mannosidase, alpha, class 2B, member 1 [Source:HGNC Symbol;Acc:6826]                                                               |
| 6476 | ENSG00000214113 | 299.6404073 | 0.587273558  | 0.18517724  | 0.004383721 | LYRM4         | LYR motif containing 4 [Source:HGNC Symbol;Acc:21365]                                                                              |
| 6477 | ENSG00000076984 | 926.7199129 | 0.475147956  | 0.14987833  | 0.004401017 | MAP2K7        | mitogen-activated protein kinase kinase 7 [Source:HGNC Symbol;Acc:6847]                                                            |
| 6478 | ENSG00000164654 | 508.6896177 | -0.482512527 | 0.152211512 | 0.004403537 | MIOS          | missing oocyte, meiosis regulator, homolog (Drosophila) [Source:HGNC Symbol;Acc:21905]                                             |
| 6479 | ENSG00000054611 | 745.5993314 | 0.387842954  | 0.122407885 | 0.004426643 | TBC1D22A      | TBC1 domain family, member 22A [Source:HGNC Symbol;Acc:1309]                                                                       |
| 6480 | ENSG00000254004 | 287.3462872 | 0.650530462  | 0.205329079 | 0.00442922  | ZNF260        | zinc finger protein 260 [Source:HGNC Symbol;Acc:13499]                                                                             |
| 6481 | ENSG00000105854 | 141.6913714 | 0.825889614  | 0.260686911 | 0.004430137 | PON2          | paraoxonase 2 [Source:HGNC Symbol;Acc:9205]                                                                                        |
| 6482 | ENSG00000114353 | 13996.45676 | -0.188045297 | 0.059370346 | 0.004441681 | GNAI2         | guanine nucleotide binding protein (G protein), alpha inhibiting activity polypeptide 2 [Source:HGNC Symbol;Acc:4385]              |
| 6483 | ENSG00000197093 | 137.1197829 | 0.858713725  | 0.271128043 | 0.004443104 | GAL3ST4       | galactose-3-O-sulfotransferase 4 [Source:HGNC Symbol;Acc:24145]                                                                    |
| 6484 | ENSG00000181444 | 1036.250868 | -0.372252435 | 0.117554254 | 0.004450756 | ZNF467        | zinc finger protein 467 [Source:HGNC Symbol;Acc:23154]                                                                             |
| 6485 | ENSG00000123610 | 436.046397  | -0.504089399 | 0.159242546 | 0.004466914 | TNFAIP6       | tumor necrosis factor, alpha-induced protein 6 [Source:HGNC Symbol;Acc:11898]                                                      |
| 6486 | ENSG00000153147 | 1938.963528 | 0.350936134  | 0.110871375 | 0.004470681 | SMARCA5       | SWI/SNF related, matrix associated, actin dependent regulator of chromatin, subfamily a, member 5 [Source:HGNC Symbol;Acc:11101]   |
| 6487 | ENSG00000165113 | 157.4978179 | 0.824333298  | 0.260577845 | 0.004497304 | GKAP1         | G kinase anchoring protein 1 [Source:HGNC Symbol;Acc:17496]                                                                        |
| 6488 | ENSG00000176101 | 468.5870635 | 0.530303881  | 0.167732525 | 0.004525701 | SSNA1         | Sjogren syndrome nuclear autoantigen 1 [Source:HGNC Symbol;Acc:11321]                                                              |
| 6489 | ENSG00000153561 | 2407.812003 | 0.289229812  | 0.091558316 | 0.004566134 | RMND5A        | required for meiotic nuclear division 5 homolog A (S. cerevisiae) [Source:HGNC Symbol;Acc:25850]                                   |
| 6490 | ENSG00000128050 | 840.6869431 | -0.405259642 | 0.128318071 | 0.004576805 | PAICS         | phosphoribosylaminoimidazole carboxylase, phosphoribosylaminoimidazole succinocarboxamide synthetase [Source:HGNC Symbol;Acc:8587] |

|      |                 |             |              |             |             |         |                                                                                                     |
|------|-----------------|-------------|--------------|-------------|-------------|---------|-----------------------------------------------------------------------------------------------------|
| 6491 | ENSG00000165410 | 91.72616144 | 0.995625225  | 0.315296961 | 0.004584032 | CFL2    | cofilin 2 (muscle) [Source:HGNC Symbol;Acc:1875]                                                    |
| 6492 | ENSG00000241549 | 84.60260427 | -1.005871045 | 0.318660606 | 0.004601895 | GUSBP2  | glucuronidase, beta pseudogene 2 [Source:HGNC Symbol;Acc:18792]                                     |
| 6493 | ENSG00000188152 | 34.78130742 | -1.429813745 | 0.45298663  | 0.004603462 | NUTM2G  | NUT family member 2G [Source:HGNC Symbol;Acc:23449]                                                 |
| 6494 | ENSG00000140263 | 328.2017497 | -0.559399861 | 0.177286216 | 0.004619606 | SORD    | sorbitol dehydrogenase [Source:HGNC Symbol;Acc:11184]                                               |
| 6495 | ENSG00000102158 | 459.1211771 | 0.467562613  | 0.148198792 | 0.004624911 | MAGT1   | magnesium transporter 1 [Source:HGNC Symbol;Acc:28880]                                              |
| 6496 | ENSG00000048471 | 707.916175  | 0.434486067  | 0.137770712 | 0.004644519 | SNX29   | sorting nexin 29 [Source:HGNC Symbol;Acc:30542]                                                     |
| 6497 | ENSG00000203797 | 79.74227827 | 1.025722444  | 0.325254116 | 0.004644835 | DDO     | D-aspartate oxidase [Source:HGNC Symbol;Acc:2727]                                                   |
| 6498 | ENSG00000143222 | 1127.86974  | 0.311356678  | 0.098731183 | 0.004644835 | UFC1    | ubiquitin-fold modifier conjugating enzyme 1 [Source:HGNC Symbol;Acc:26941]                         |
| 6499 | ENSG00000106246 | 320.8809431 | 0.571812943  | 0.18136096  | 0.004654953 | PTCD1   | pentatricopeptide repeat domain 1 [Source:HGNC Symbol;Acc:22198]                                    |
| 6500 | ENSG00000184305 | 60.63873147 | -1.195455486 | 0.379221755 | 0.004662346 | CCSER1  | coiled-coil serine-rich protein 1 [Source:HGNC Symbol;Acc:29349]                                    |
| 6501 | ENSG00000077147 | 2480.384201 | 0.239430128  | 0.076023684 | 0.00470938  | TM9SF3  | transmembrane 9 superfamily member 3 [Source:HGNC Symbol;Acc:21529]                                 |
| 6502 | ENSG00000240857 | 147.3600497 | 0.804572734  | 0.255547966 | 0.004724688 | RDH14   | retinol dehydrogenase 14 (all-trans/9-cis/11-cis) [Source:HGNC Symbol;Acc:19979]                    |
| 6503 | ENSG00000174255 | 74.4605073  | 1.099827315  | 0.349429361 | 0.004738952 | ZNF80   | zinc finger protein 80 [Source:HGNC Symbol;Acc:13155]                                               |
| 6504 | ENSG00000170891 | 109.3782623 | 0.905420956  | 0.287762817 | 0.00475578  | CYTL1   | cytokine-like 1 [Source:HGNC Symbol;Acc:24435]                                                      |
| 6505 | ENSG00000259494 | 192.7394383 | 0.702808556  | 0.223374322 | 0.004756472 | MRPL46  | mitochondrial ribosomal protein L46 [Source:HGNC Symbol;Acc:1192]                                   |
| 6506 | ENSG00000105290 | 13.78454701 | -1.717568354 | 0.546271571 | 0.004790847 | APLP1   | amyloid beta (A4) precursor-like protein 1 [Source:HGNC Symbol;Acc:597]                             |
| 6507 | ENSG00000217930 | 519.9483293 | -0.439832988 | 0.139890202 | 0.004790847 | PAM16   | presequence translocase-associated motor 16 homolog (S. cerevisiae) [Source:HGNC Symbol;Acc:29679]  |
| 6508 | ENSG00000231048 | 285.9181739 | -0.734692351 | 0.23368667  | 0.00479354  | LST1    | leukocyte specific transcript 1 [Source:HGNC Symbol;Acc:14189]                                      |
| 6509 | ENSG00000162408 | 490.4409269 | 0.505807706  | 0.160919264 | 0.004803979 | NOL9    | nucleolar protein 9 [Source:HGNC Symbol;Acc:26265]                                                  |
| 6510 | ENSG00000173209 | 5492.672735 | 0.186665519  | 0.059406841 | 0.004821056 | AHSA2   | AHA1, activator of heat shock 90kDa protein ATPase homolog 2 (yeast) [Source:HGNC Symbol;Acc:20437] |
| 6511 | ENSG00000116106 | 110.9194441 | 1.029775934  | 0.327814584 | 0.004833812 | EPHA4   | EPH receptor A4 [Source:HGNC Symbol;Acc:3388]                                                       |
| 6512 | ENSG00000269639 | 459.3158783 | 0.465368867  | 0.148156926 | 0.00483774  | MAGT1   | magnesium transporter 1 [Source:HGNC Symbol;Acc:28880]                                              |
| 6513 | ENSG00000168393 | 268.1192001 | -0.626357273 | 0.199445065 | 0.004846147 | DTYMK   | deoxythymidylate kinase (thymidylate kinase) [Source:HGNC Symbol;Acc:3061]                          |
| 6514 | ENSG00000204165 | 303.1565597 | 0.562736277  | 0.17919808  | 0.004848666 | Cxorf65 | chromosome X open reading frame 65 [Source:HGNC Symbol;Acc:33713]                                   |
| 6515 | ENSG00000148824 | 312.3178756 | 0.57723781   | 0.183837314 | 0.004853962 | MTG1    | mitochondrial ribosome-associated GTPase 1 [Source:HGNC Symbol;Acc:32159]                           |
| 6516 | ENSG00000137491 | 68.3871792  | 1.279473505  | 0.407589053 | 0.004866686 | SLCO2B1 | solute carrier organic anion transporter family, member 2B1 [Source:HGNC Symbol;Acc:10962]          |
| 6517 | ENSG00000005700 | 623.5368353 | 0.417086522  | 0.132898362 | 0.004878226 | IBTK    | inhibitor of Bruton agammaglobulinemia tyrosine kinase [Source:HGNC Symbol;Acc:17853]               |
| 6518 | ENSG00000160072 | 358.0393751 | 0.659000377  | 0.210105506 | 0.004908623 | ATAD3B  | ATPase family, AAA domain containing 3B [Source:HGNC Symbol;Acc:24007]                              |

|      |                 |             |              |             |             |           |                                                                                                                 |
|------|-----------------|-------------|--------------|-------------|-------------|-----------|-----------------------------------------------------------------------------------------------------------------|
| 6519 | ENSG00000185252 | 172.1864718 | 0.776630011  | 0.247662836 | 0.004919352 | ZNF74     | zinc finger protein 74 [Source:HGNC Symbol;Acc:13144]                                                           |
| 6520 | ENSG00000183474 | 981.2400467 | -0.344159717 | 0.109771995 | 0.004928881 | GTF2H2C   | general transcription factor IIH, polypeptide 2C [Source:HGNC Symbol;Acc:31394]                                 |
| 6521 | ENSG00000108578 | 480.3089517 | 0.479655162  | 0.153008745 | 0.004934874 | BLMH      | bleomycin hydrolase [Source:HGNC Symbol;Acc:1059]                                                               |
| 6522 | ENSG00000182871 | 755.314997  | 0.544370627  | 0.173661376 | 0.004936718 | COL18A1   | collagen, type XVIII, alpha 1 [Source:HGNC Symbol;Acc:2195]                                                     |
| 6523 | ENSG00000165406 | 985.7133508 | -0.409397073 | 0.130622911 | 0.004943991 | MARCH8    | membrane-associated ring finger (C3HC4) 8, E3 ubiquitin protein ligase [Source:HGNC Symbol;Acc:23356]           |
| 6524 | ENSG00000105879 | 1033.61507  | 0.339643618  | 0.10836917  | 0.004944164 | CBLL1     | Cbl proto-oncogene-like 1, E3 ubiquitin protein ligase [Source:HGNC Symbol;Acc:21225]                           |
| 6525 | ENSG00000103351 | 270.5316109 | 0.63123587   | 0.201432229 | 0.004950097 | CLUAP1    | clusterin associated protein 1 [Source:HGNC Symbol;Acc:19009]                                                   |
| 6526 | ENSG00000262788 | 34.63094635 | 1.540046484  | 0.491722813 | 0.004979748 | CIRH1A    | cirrhosis, autosomal recessive 1A (cirhin) [Source:HGNC Symbol;Acc:1983]                                        |
| 6527 | ENSG00000185236 | 977.5745588 | 0.38644011   | 0.123410576 | 0.004989224 | RAB11B    | RAB11B, member RAS oncogene family [Source:HGNC Symbol;Acc:9761]                                                |
| 6528 | ENSG00000198246 | 86.88646857 | 1.032242924  | 0.329659492 | 0.004990112 | SLC29A3   | solute carrier family 29 (equilibrative nucleoside transporter), member 3 [Source:HGNC Symbol;Acc:23096]        |
| 6529 | ENSG00000205755 | 9.811095716 | 1.773705509  | 0.56650242  | 0.004993831 | CRLF2     | cytokine receptor-like factor 2 [Source:HGNC Symbol;Acc:14281]                                                  |
| 6530 | ENSG00000136866 | 41.57088401 | 1.359529381  | 0.434289673 | 0.005001732 | ZFP37     | ZFP37 zinc finger protein [Source:HGNC Symbol;Acc:12863]                                                        |
| 6531 | ENSG00000176994 | 695.361882  | 0.414514728  | 0.132420807 | 0.005003401 | SMCR8     | Smith-Magenis syndrome chromosome region, candidate 8 [Source:HGNC Symbol;Acc:17921]                            |
| 6532 | ENSG00000204767 | 29.57132612 | -1.525334095 | 0.487283782 | 0.005003401 | FAM196B   | family with sequence similarity 196, member B [Source:HGNC Symbol;Acc:37271]                                    |
| 6533 | ENSG00000138363 | 607.4339088 | 0.442852622  | 0.141502905 | 0.00501359  | ATIC      | 5-aminoimidazole-4-carboxamide ribonucleotide formyltransferase/IMP cyclohydrolase [Source:HGNC Symbol;Acc:794] |
| 6534 | ENSG00000113595 | 365.601346  | 0.531628553  | 0.169897178 | 0.005021649 | TRIM23    | tripartite motif containing 23 [Source:HGNC Symbol;Acc:660]                                                     |
| 6535 | ENSG00000188938 | 658.1026015 | 0.399884389  | 0.127820776 | 0.005031864 | FAM120AOS | family with sequence similarity 120A opposite strand [Source:HGNC Symbol;Acc:23389]                             |
| 6536 | ENSG00000188827 | 347.3474846 | -0.546534319 | 0.174707702 | 0.005034501 | SLX4      | SLX4 structure-specific endonuclease subunit [Source:HGNC Symbol;Acc:23845]                                     |
| 6537 | ENSG00000166035 | 35.7329859  | 1.430877816  | 0.457439186 | 0.005038199 | LIPC      | lipase, hepatic [Source:HGNC Symbol;Acc:6619]                                                                   |
| 6538 | ENSG00000173548 | 75.41997533 | 1.080347005  | 0.345411261 | 0.005042665 | SNX33     | sorting nexin 33 [Source:HGNC Symbol;Acc:28468]                                                                 |
| 6539 | ENSG00000167716 | 427.1381823 | 0.606010884  | 0.193761471 | 0.005043596 | WDR81     | WD repeat domain 81 [Source:HGNC Symbol;Acc:26600]                                                              |
| 6540 | ENSG00000125246 | 61.76682337 | 1.169237898  | 0.373852833 | 0.005044158 | CLYBL     | citrate lyase beta like [Source:HGNC Symbol;Acc:18355]                                                          |
| 6541 | ENSG00000089289 | 1133.900506 | 0.333900414  | 0.106769394 | 0.005047346 | IGBP1     | immunoglobulin (CD79A) binding protein 1 [Source:HGNC Symbol;Acc:5461]                                          |
| 6542 | ENSG00000147439 | 1034.038277 | -0.396622982 | 0.126838474 | 0.005051931 | BIN3      | bridging integrator 3 [Source:HGNC Symbol;Acc:1054]                                                             |
| 6543 | ENSG00000197969 | 1771.74687  | 0.305897176  | 0.097848462 | 0.005064212 | VPS13A    | vacuolar protein sorting 13 homolog A ( <i>S. cerevisiae</i> ) [Source:HGNC Symbol;Acc:1908]                    |
| 6544 | ENSG00000150967 | 84.1018203  | -1.020265943 | 0.326375384 | 0.005066596 | ABCB9     | ATP-binding cassette, sub-family B (MDR/TAP), member 9 [Source:HGNC Symbol;Acc:50]                              |
| 6545 | ENSG00000149054 | 43.13743213 | -1.282977119 | 0.410504748 | 0.005077645 | ZNF215    | zinc finger protein 215 [Source:HGNC Symbol;Acc:13007]                                                          |
| 6546 | ENSG00000134201 | 15.37813741 | 1.734359071  | 0.554974521 | 0.005081188 | GSTM5     | glutathione S-transferase mu 5 [Source:HGNC Symbol;Acc:4637]                                                    |



|      |                 |             |              |             |             |             |                                                                                                 |
|------|-----------------|-------------|--------------|-------------|-------------|-------------|-------------------------------------------------------------------------------------------------|
| 6547 | ENSG00000129226 | 2469.414528 | 0.247703225  | 0.079305983 | 0.005110346 | CD68        | CD68 molecule [Source:HGNC Symbol;Acc:1693]                                                     |
| 6548 | ENSG00000065882 | 2561.351999 | -0.257902401 | 0.082590389 | 0.005122043 | TBC1D1      | TBC1 (tre-2/USP6, BUB2, cdc16) domain family, member 1 [Source:HGNC Symbol;Acc:11578]           |
| 6549 | ENSG00000010539 | 739.5287157 | 0.39937977   | 0.127904758 | 0.005124579 | ZNF200      | zinc finger protein 200 [Source:HGNC Symbol;Acc:12993]                                          |
| 6550 | ENSG00000198363 | 689.7320049 | 0.46232264   | 0.148081087 | 0.005130532 | ASPH        | aspartate beta-hydroxylase [Source:HGNC Symbol;Acc:757]                                         |
| 6551 | ENSG00000267264 | 22.81809606 | -1.578522348 | 0.505671043 | 0.005137636 | CTC-459F4.6 |                                                                                                 |
| 6552 | ENSG00000153071 | 149.3531709 | 0.931050955  | 0.298483267 | 0.00517827  | DAB2        | Dab, mitogen-responsive phosphoprotein, homolog 2 (Drosophila) [Source:HGNC Symbol;Acc:2662]    |
| 6553 | ENSG00000163374 | 3124.13907  | -0.222999521 | 0.071508782 | 0.005191242 | YY1AP1      | YY1 associated protein 1 [Source:HGNC Symbol;Acc:30935]                                         |
| 6554 | ENSG00000236056 | 13.26516182 | 1.747149194  | 0.560267527 | 0.005191716 | GAPDHP14    | glyceraldehyde-3-phosphate dehydrogenase pseudogene 14 [Source:HGNC Symbol;Acc:4160]            |
| 6555 | ENSG00000054654 | 5431.437471 | 0.20424519   | 0.065500047 | 0.005194    | SYNE2       | spectrin repeat containing, nuclear envelope 2 [Source:HGNC Symbol;Acc:17084]                   |
| 6556 | ENSG00000139725 | 1418.810993 | 0.291533286  | 0.093520833 | 0.005209734 | RHOF        | ras homolog family member F (in filopodia) [Source:HGNC Symbol;Acc:15703]                       |
| 6557 | ENSG00000197844 | 36.62597641 | -1.351616847 | 0.433642421 | 0.005216293 | AL358813.1  |                                                                                                 |
| 6558 | ENSG00000100422 | 2594.053304 | 0.233681243  | 0.075003134 | 0.005238061 | CERK        | ceramide kinase [Source:HGNC Symbol;Acc:19256]                                                  |
| 6559 | ENSG00000116525 | 247.305116  | 0.621766426  | 0.199610983 | 0.00525022  | TRIM62      | tripartite motif containing 62 [Source:HGNC Symbol;Acc:25574]                                   |
| 6560 | ENSG00000196476 | 187.9720334 | -0.683835738 | 0.219669208 | 0.00528272  | C20orf96    | chromosome 20 open reading frame 96 [Source:HGNC Symbol;Acc:16227]                              |
| 6561 | ENSG00000166479 | 2036.577553 | -0.246452981 | 0.079199737 | 0.005304053 | TMX3        | thioredoxin-related transmembrane protein 3 [Source:HGNC Symbol;Acc:24718]                      |
| 6562 | ENSG00000230373 | 252.9198021 | -0.637244266 | 0.204789752 | 0.00530487  | GOLGA6L5P   | golgin A6 family-like 5, pseudogene [Source:HGNC Symbol;Acc:30472]                              |
| 6563 | ENSG00000111837 | 94.79250151 | 0.990858441  | 0.318469705 | 0.005311046 | MAK         | male germ cell-associated kinase [Source:HGNC Symbol;Acc:6816]                                  |
| 6564 | ENSG00000158106 | 108.3093089 | 1.06079448   | 0.340992039 | 0.005317517 | RHPN1       | rhophilin, Rho GTPase binding protein 1 [Source:HGNC Symbol;Acc:19973]                          |
| 6565 | ENSG00000116898 | 626.8717219 | -0.417800082 | 0.134310727 | 0.005320473 | MRPS15      | mitochondrial ribosomal protein S15 [Source:HGNC Symbol;Acc:14504]                              |
| 6566 | ENSG00000167034 | 24.26801921 | 1.565628953  | 0.50332862  | 0.005322321 | NKX3-1      | NK3 homeobox 1 [Source:HGNC Symbol;Acc:7838]                                                    |
| 6567 | ENSG00000100297 | 1306.53014  | -0.382859165 | 0.12312002  | 0.005337902 | MCM5        | minichromosome maintenance complex component 5 [Source:HGNC Symbol;Acc:6948]                    |
| 6568 | ENSG00000136381 | 1651.123076 | 0.343840291  | 0.110645148 | 0.005374191 | IREB2       | iron-responsive element binding protein 2 [Source:HGNC Symbol;Acc:6115]                         |
| 6569 | ENSG00000167113 | 517.8338274 | 0.431279526  | 0.138798868 | 0.005380072 | COQ4        | coenzyme Q4 [Source:HGNC Symbol;Acc:19693]                                                      |
| 6570 | ENSG00000102057 | 267.9418564 | -0.697893181 | 0.224609416 | 0.005380805 | KCND1       | potassium voltage-gated channel, Shal-related subfamily, member 1 [Source:HGNC Symbol;Acc:6237] |
| 6571 | ENSG00000238227 | 469.4559703 | 0.515100616  | 0.165832391 | 0.005398018 | C9orf69     | chromosome 9 open reading frame 69 [Source:HGNC Symbol;Acc:31009]                               |
| 6572 | ENSG00000150681 | 2242.347723 | -0.244702526 | 0.078794863 | 0.005407931 | RG518       | regulator of G-protein signaling 18 [Source:HGNC Symbol;Acc:14261]                              |
| 6573 | ENSG00000124875 | 52.54542937 | -1.171023332 | 0.377117436 | 0.005413859 | CXCL6       | chemokine (C-X-C motif) ligand 6 [Source:HGNC Symbol;Acc:10643]                                 |
| 6574 | ENSG00000132205 | 662.3394002 | 0.407690861  | 0.131313571 | 0.005421884 | EMILIN2     | elastin microfibril interfacer 2 [Source:HGNC Symbol;Acc:19881]                                 |

|      |                 |             |              |             |             |              |                                                                                             |
|------|-----------------|-------------|--------------|-------------|-------------|--------------|---------------------------------------------------------------------------------------------|
| 6575 | ENSG00000250017 | 125.0005662 | -0.850849266 | 0.274091923 | 0.005429577 | RP11-484L7.2 |                                                                                             |
| 6576 | ENSG00000127418 | 123.4418355 | 0.868839806  | 0.279900107 | 0.005431342 | FGFRL1       | fibroblast growth factor receptor-like 1 [Source:HGNC Symbol;Acc:3693]                      |
| 6577 | ENSG00000203871 | 48.99972946 | -1.214452807 | 0.391290172 | 0.005437728 | C6orf164     | chromosome 6 open reading frame 164 [Source:HGNC Symbol;Acc:21404]                          |
| 6578 | ENSG00000122121 | 24.70786239 | 1.531314149  | 0.493395414 | 0.005438545 | XPNPEP2      | X-prolyl aminopeptidase (aminopeptidase P) 2, membrane-bound [Source:HGNC Symbol;Acc:12823] |
| 6579 | ENSG00000144118 | 3766.59707  | -0.224108242 | 0.072225535 | 0.005451144 | RALB         | v-ral simian leukemia viral oncogene homolog B [Source:HGNC Symbol;Acc:9840]                |
| 6580 | ENSG00000224813 | 47.53780798 | -1.237063856 | 0.398771035 | 0.005463295 | RP4-669L17.4 |                                                                                             |
| 6581 | ENSG00000175582 | 2335.532479 | -0.232402288 | 0.07492131  | 0.005466879 | RAB6A        | RAB6A, member RAS oncogene family [Source:HGNC Symbol;Acc:9786]                             |
| 6582 | ENSG00000236233 | 53.24328097 | -1.300701627 | 0.419417858 | 0.005479815 | RP11-12A20.7 |                                                                                             |
| 6583 | ENSG00000154102 | 90.56359736 | 0.967567368  | 0.312104413 | 0.005498761 | C16orf74     | chromosome 16 open reading frame 74 [Source:HGNC Symbol;Acc:23362]                          |
| 6584 | ENSG00000186260 | 204.8349504 | -0.704819752 | 0.22739064  | 0.00550798  | MKL2         | MKL/myocardin-like 2 [Source:HGNC Symbol;Acc:29819]                                         |
| 6585 | ENSG00000183648 | 1051.806033 | -0.345323856 | 0.11144716  | 0.005526798 | NDUFB1       | NADH dehydrogenase (ubiquinone) 1 beta subcomplex, 1, 7kDa [Source:HGNC Symbol;Acc:7695]    |
| 6586 | ENSG00000189212 | 36.58649793 | -1.385393086 | 0.447133606 | 0.005528189 | DPY19L2P1    | DPY19L2 pseudogene 1 [Source:HGNC Symbol;Acc:22305]                                         |
| 6587 | ENSG00000161217 | 3154.244369 | -0.242339139 | 0.07821482  | 0.005528189 | PCYT1A       | phosphate cytidyltransferase 1, choline, alpha [Source:HGNC Symbol;Acc:8754]                |
| 6588 | ENSG00000197892 | 553.7013633 | 0.446526024  | 0.144182947 | 0.005554236 | KIF13B       | kinesin family member 13B [Source:HGNC Symbol;Acc:14405]                                    |
| 6589 | ENSG00000253882 | 66.97383106 | 1.127209923  | 0.364086797 | 0.005571184 | RP11-61L23.2 |                                                                                             |
| 6590 | ENSG00000161328 | 15.90246718 | 1.680023752  | 0.542714707 | 0.005577848 | LRRCS6       | leucine rich repeat containing 56 [Source:HGNC Symbol;Acc:25430]                            |
| 6591 | ENSG00000121570 | 92.1806791  | -0.998962469 | 0.322724847 | 0.005580663 | DPPA4        | developmental pluripotency associated 4 [Source:HGNC Symbol;Acc:19200]                      |
| 6592 | ENSG00000125743 | 1136.118494 | 0.340761461  | 0.110088685 | 0.005580988 | SNRPD2       | small nuclear ribonucleoprotein D2 polypeptide 16.5kDa [Source:HGNC Symbol;Acc:11159]       |
| 6593 | ENSG00000183281 | 377.1947244 | 0.509532088  | 0.164619933 | 0.005582646 | PLGLB1       | plasminogen-like B1 [Source:HGNC Symbol;Acc:9072]                                           |
| 6594 | ENSG00000165338 | 53.24337766 | 1.231919739  | 0.398021803 | 0.005583619 | HECTD2       | HECT domain containing E3 ubiquitin protein ligase 2 [Source:HGNC Symbol;Acc:26736]         |
| 6595 | ENSG00000131373 | 238.7931825 | 0.622632811  | 0.201218487 | 0.005597731 | HACL1        | 2-hydroxyacyl-CoA lyase 1 [Source:HGNC Symbol;Acc:17856]                                    |
| 6596 | ENSG00000162614 | 74.64904596 | 1.083648048  | 0.3502115   | 0.005597731 | NEXN         | nexilin (F actin binding protein) [Source:HGNC Symbol;Acc:29557]                            |
| 6597 | ENSG00000154803 | 1963.859505 | -0.265119557 | 0.085719753 | 0.005623414 | FLCN         | folliculin [Source:HGNC Symbol;Acc:27310]                                                   |
| 6598 | ENSG00000198642 | 1169.373062 | 0.313080702  | 0.101247704 | 0.00563468  | KLHL9        | kelch-like family member 9 [Source:HGNC Symbol;Acc:18732]                                   |
| 6599 | ENSG00000164976 | 396.0662944 | -0.507826904 | 0.164239787 | 0.005638393 | KIAA1161     | KIAA1161 [Source:HGNC Symbol;Acc:19918]                                                     |
| 6600 | ENSG00000261283 | 335.8084104 | 0.542151795  | 0.175365988 | 0.0056459   | PRKRIP1      | PRKR interacting protein 1 (IL11 inducible) [Source:HGNC Symbol;Acc:21894]                  |
| 6601 | ENSG00000259075 | 99.97221252 | 1.749916505  | 0.566107734 | 0.005652804 | POC1B-GALNT4 | POC1B-GALNT4 readthrough [Source:HGNC Symbol;Acc:42957]                                     |
| 6602 | ENSG00000149823 | 731.3786296 | 0.465603683  | 0.150639617 | 0.00565751  | VPS51        | vacuolar protein sorting 51 homolog (S. cerevisiae) [Source:HGNC Symbol;Acc:1172]           |

|      |                 |             |              |             |             |              |                                                                                                                                 |
|------|-----------------|-------------|--------------|-------------|-------------|--------------|---------------------------------------------------------------------------------------------------------------------------------|
| 6603 | ENSG00000159899 | 112.6039346 | 0.881006662  | 0.285053799 | 0.005660022 | NPR2         | natriuretic peptide receptor B/guanylate cyclase B (atrionatriuretic peptide receptor B) [Source:HGNC Symbol;Acc:7944]          |
| 6604 | ENSG00000145337 | 754.7967736 | 0.387322007  | 0.125350458 | 0.005673571 | PYURF        | PIGY upstream reading frame [Source:HGNC Symbol;Acc:44317]                                                                      |
| 6605 | ENSG00000006704 | 27.78946556 | 1.501975188  | 0.486146928 | 0.00567965  | GTF2IRD1     | GTF2I repeat domain containing 1 [Source:HGNC Symbol;Acc:4661]                                                                  |
| 6606 | ENSG00000167550 | 51.56217502 | 1.204092131  | 0.389751983 | 0.005682032 | RHEBL1       | Ras homolog enriched in brain like 1 [Source:HGNC Symbol;Acc:21166]                                                             |
| 6607 | ENSG00000181222 | 5470.719214 | 0.18191825   | 0.058890506 | 0.005686671 | POLR2A       | polymerase (RNA) II (DNA directed) polypeptide A, 220kDa [Source:HGNC Symbol;Acc:9187]                                          |
| 6608 | ENSG00000125170 | 193.5880393 | 0.706769552  | 0.228820465 | 0.005692349 | DOK4         | docking protein 4 [Source:HGNC Symbol;Acc:19868]                                                                                |
| 6609 | ENSG00000261920 | 27.78659939 | 1.501598413  | 0.486157758 | 0.005692358 | GTF2IRD1     | GTF2I repeat domain containing 1 [Source:HGNC Symbol;Acc:4661]                                                                  |
| 6610 | ENSG00000227201 | 29.46841085 | -1.420905393 | 0.460122442 | 0.005703064 | CNN2P1       | calponin 2 pseudogene 1 [Source:HGNC Symbol;Acc:39526]                                                                          |
| 6611 | ENSG00000196235 | 2360.645622 | 0.260123542  | 0.084248181 | 0.005712117 | SUPT5H       | suppressor of Ty 5 homolog ( <i>S. cerevisiae</i> ) [Source:HGNC Symbol;Acc:11469]                                              |
| 6612 | ENSG00000158941 | 1820.693028 | 0.269186621  | 0.087195044 | 0.005719107 | CCAR2        | cell cycle and apoptosis regulator 2 [Source:HGNC Symbol;Acc:23360]                                                             |
| 6613 | ENSG00000119514 | 81.13285525 | 1.078774469  | 0.349454556 | 0.005721213 | GALNT12      | UDP-N-acetyl-alpha-D-galactosamine:polypeptide N-acetylgalactosaminyltransferase 12 (GalNAc-T12) [Source:HGNC Symbol;Acc:19877] |
| 6614 | ENSG00000092847 | 1644.950954 | 0.273635872  | 0.08867301  | 0.005742045 | AGO1         | argonaute RISC catalytic component 1 [Source:HGNC Symbol;Acc:3262]                                                              |
| 6615 | ENSG00000148399 | 554.2009189 | 0.443271711  | 0.143673019 | 0.005753093 | DPH7         | diphthamide biosynthesis 7 [Source:HGNC Symbol;Acc:25199]                                                                       |
| 6616 | ENSG00000129990 | 38.64073353 | -1.318028909 | 0.427301807 | 0.005766609 | SYT5         | synaptotagmin V [Source:HGNC Symbol;Acc:11513]                                                                                  |
| 6617 | ENSG00000136813 | 1881.45007  | -0.321688303 | 0.104323118 | 0.005784416 | KIAA0368     | KIAA0368 [Source:HGNC Symbol;Acc:29020]                                                                                         |
| 6618 | ENSG00000125534 | 449.0631351 | 0.551540585  | 0.178880532 | 0.005789108 | PPDPF        | pancreatic progenitor cell differentiation and proliferation factor [Source:HGNC Symbol;Acc:16142]                              |
| 6619 | ENSG00000253328 | 89.79231479 | -0.973443561 | 0.315873604 | 0.005818259 | SUMO2P19     | SUMO2 pseudogene 19 [Source:HGNC Symbol;Acc:49357]                                                                              |
| 6620 | ENSG00000174951 | 112.478018  | -0.975720629 | 0.316655439 | 0.005825553 | FUT1         | fucosyltransferase 1 (galactoside 2-alpha-L-fucosyltransferase, H blood group) [Source:HGNC Symbol;Acc:4012]                    |
| 6621 | ENSG00000139977 | 405.6637149 | 0.491845691  | 0.159629892 | 0.005827989 | NAA30        | N(alpha)-acetyltransferase 30, NatC catalytic subunit [Source:HGNC Symbol;Acc:19844]                                            |
| 6622 | ENSG00000268699 | 2061.382657 | 0.262736293  | 0.085273939 | 0.005828624 | GAB3         | GRB2-associated binding protein 3 [Source:HGNC Symbol;Acc:17515]                                                                |
| 6623 | ENSG00000159377 | 3230.409877 | 0.208603836  | 0.067728023 | 0.005848163 | PSMB4        | proteasome (prosome, macropain) subunit, beta type, 4 [Source:HGNC Symbol;Acc:9541]                                             |
| 6624 | ENSG00000260078 | 840.0572068 | -0.359503065 | 0.116721815 | 0.005848163 | RP11-44F14.1 |                                                                                                                                 |
| 6625 | ENSG00000149313 | 510.0131099 | 0.445609788  | 0.144689396 | 0.005851813 | AASDHPPT     | aminoadipate-semialdehyde dehydrogenase-phosphopantetheinyl transferase [Source:HGNC Symbol;Acc:14235]                          |
| 6626 | ENSG00000117528 | 636.4554691 | -0.412164494 | 0.133853626 | 0.005861745 | ABCD3        | ATP-binding cassette, sub-family D (ALD), member 3 [Source:HGNC Symbol;Acc:67]                                                  |
| 6627 | ENSG00000127954 | 8374.603059 | 0.171748711  | 0.05580081  | 0.005887057 | STEAP4       | STEAP family member 4 [Source:HGNC Symbol;Acc:21923]                                                                            |
| 6628 | ENSG00000056586 | 1692.616382 | 0.325370327  | 0.105736873 | 0.005900391 | RC3H2        | ring finger and CCCH-type domains 2 [Source:HGNC Symbol;Acc:21461]                                                              |
| 6629 | ENSG00000116221 | 469.9342849 | -0.451369793 | 0.146694847 | 0.005904249 | MRPL37       | mitochondrial ribosomal protein L37 [Source:HGNC Symbol;Acc:14034]                                                              |
| 6630 | ENSG00000188611 | 22.67865822 | 1.636223146  | 0.531921373 | 0.005920573 | ASAH2        | N-acylsphingosine amidohydrolase (non-lysosomal ceramidase) 2 [Source:HGNC Symbol;Acc:18860]                                    |

|      |                 |             |              |             |             |              |                                                                                                       |
|------|-----------------|-------------|--------------|-------------|-------------|--------------|-------------------------------------------------------------------------------------------------------|
| 6631 | ENSG00000127511 | 1706.405145 | -0.312155605 | 0.101488765 | 0.005925578 | SIN3B        | SIN3 transcription regulator family member B [Source:HGNC Symbol;Acc:19354]                           |
| 6632 | ENSG00000166509 | 21.72293385 | -1.572506306 | 0.511547231 | 0.005959456 | CLEC3A       | C-type lectin domain family 3, member A [Source:HGNC Symbol;Acc:2052]                                 |
| 6633 | ENSG00000111615 | 649.9981057 | 0.400827317  | 0.130396636 | 0.005960782 | KRR1         | KRR1, small subunit (SSU) processome component, homolog (yeast) [Source:HGNC Symbol;Acc:5176]         |
| 6634 | ENSG00000141219 | 323.716113  | 0.538170849  | 0.175303664 | 0.006039747 | C17orf80     | chromosome 17 open reading frame 80 [Source:HGNC Symbol;Acc:29601]                                    |
| 6635 | ENSG00000204186 | 149.6531188 | 0.816349334  | 0.265983857 | 0.006054348 | ZDBF2        | zinc finger, DBF-type containing 2 [Source:HGNC Symbol;Acc:29313]                                     |
| 6636 | ENSG00000130234 | 10.78611666 | -1.724491855 | 0.562051009 | 0.006072843 | ACE2         | angiotensin I converting enzyme 2 [Source:HGNC Symbol;Acc:13557]                                      |
| 6637 | ENSG00000110844 | 85.34752185 | 1.044932316  | 0.340589904 | 0.006076096 | PRPF40B      | PRP40 pre-mRNA processing factor 40 homolog B ( <i>S. cerevisiae</i> ) [Source:HGNC Symbol;Acc:25031] |
| 6638 | ENSG00000234487 | 1538.111241 | 1.141394879  | 0.372057055 | 0.006079493 | HLA-F        | major histocompatibility complex, class I, F [Source:HGNC Symbol;Acc:4963]                            |
| 6639 | ENSG00000147669 | 498.5415533 | -0.438593453 | 0.142991036 | 0.006089079 | POLR2K       | polymerase (RNA) II (DNA directed) polypeptide K, 7.0kDa [Source:HGNC Symbol;Acc:9198]                |
| 6640 | ENSG0000064201  | 2137.983636 | -0.326369082 | 0.106446011 | 0.006113195 | TSPAN32      | tetraspanin 32 [Source:HGNC Symbol;Acc:13410]                                                         |
| 6641 | ENSG00000158234 | 82.20695904 | 0.981118708  | 0.320026287 | 0.006118586 | FAIM         | Fas apoptotic inhibitory molecule [Source:HGNC Symbol;Acc:18703]                                      |
| 6642 | ENSG00000137166 | 135.0799125 | 0.831956012  | 0.271457218 | 0.006136667 | FOXP4        | forkhead box P4 [Source:HGNC Symbol;Acc:20842]                                                        |
| 6643 | ENSG00000165028 | 73.72664278 | 1.078212887  | 0.351808559 | 0.006136667 | NIPSNAP3B    | nipsnap homolog 3B ( <i>C. elegans</i> ) [Source:HGNC Symbol;Acc:23641]                               |
| 6644 | ENSG00000120526 | 140.5176853 | 0.801887151  | 0.261657458 | 0.006138347 | NUDCD1       | NudC domain containing 1 [Source:HGNC Symbol;Acc:24306]                                               |
| 6645 | ENSG00000219626 | 680.9383654 | -0.397375746 | 0.129675606 | 0.006142792 | FAM228B      | family with sequence similarity 228, member B [Source:HGNC Symbol;Acc:24736]                          |
| 6646 | ENSG00000137502 | 173.8886079 | 0.80823266   | 0.263804942 | 0.00615486  | RAB30        | RAB30, member RAS oncogene family [Source:HGNC Symbol;Acc:9770]                                       |
| 6647 | ENSG00000151692 | 682.2253746 | -0.389134064 | 0.127028178 | 0.006161816 | RNF144A      | ring finger protein 144A [Source:HGNC Symbol;Acc:20457]                                               |
| 6648 | ENSG00000163710 | 14.13458041 | -1.678455454 | 0.548004927 | 0.006171618 | PCOLCE2      | procollagen C-endopeptidase enhancer 2 [Source:HGNC Symbol;Acc:8739]                                  |
| 6649 | ENSG0000099381  | 494.3406792 | 0.49219003   | 0.160717147 | 0.006178657 | SETD1A       | SET domain containing 1A [Source:HGNC Symbol;Acc:29010]                                               |
| 6650 | ENSG00000227460 | 270.9561905 | 0.699629303  | 0.228499564 | 0.006190545 | SYNGAP1      | synaptic Ras GTPase activating protein 1 [Source:HGNC Symbol;Acc:11497]                               |
| 6651 | ENSG00000122085 | 683.2589776 | 0.387139036  | 0.126455075 | 0.006197186 | MTERFD2      | MTERF domain containing 2 [Source:HGNC Symbol;Acc:28785]                                              |
| 6652 | ENSG00000152284 | 142.1673222 | -0.822200155 | 0.268751508 | 0.006240747 | TCF7L1       | transcription factor 7-like 1 (T-cell specific, HMG-box) [Source:HGNC Symbol;Acc:11640]               |
| 6653 | ENSG00000150764 | 37.74490458 | -1.323938707 | 0.432776177 | 0.006243054 | DIXDC1       | DIX domain containing 1 [Source:HGNC Symbol;Acc:23695]                                                |
| 6654 | ENSG00000186111 | 597.2600988 | 0.500763618  | 0.16372736  | 0.006255782 | PIP5K1C      | phosphatidylinositol-4-phosphate 5-kinase, type I, gamma [Source:HGNC Symbol;Acc:8996]                |
| 6655 | ENSG00000184207 | 641.7134976 | -0.408950875 | 0.133748859 | 0.006274045 | PGP          | phosphoglycolate phosphatase [Source:HGNC Symbol;Acc:8909]                                            |
| 6656 | ENSG00000121931 | 532.8046396 | 0.435682685  | 0.142526698 | 0.006288884 | LRIF1        | ligand dependent nuclear receptor interacting factor 1 [Source:HGNC Symbol;Acc:30299]                 |
| 6657 | ENSG00000242097 | 39.84807803 | -1.283161116 | 0.419841731 | 0.006299537 | RP11-64D22.1 |                                                                                                       |
| 6658 | ENSG00000160201 | 4376.456793 | -0.194873101 | 0.063768484 | 0.006305955 | U2AF1        | U2 small nuclear RNA auxiliary factor 1 [Source:HGNC Symbol;Acc:12453]                                |

|      |                 |             |              |             |             |               |                                                                                                       |
|------|-----------------|-------------|--------------|-------------|-------------|---------------|-------------------------------------------------------------------------------------------------------|
| 6659 | ENSG00000130803 | 903.5867528 | 0.386110312  | 0.126373106 | 0.006317496 | ZNF317        | zinc finger protein 317 [Source:HGNC Symbol;Acc:13507]                                                |
| 6660 | ENSG00000205476 | 39.01188858 | 1.453608284  | 0.475764815 | 0.006317496 | CCDC85C       | coiled-coil domain containing 85C [Source:HGNC Symbol;Acc:35459]                                      |
| 6661 | ENSG00000121406 | 299.1926634 | 0.58700303   | 0.192165302 | 0.00632985  | ZNF549        | zinc finger protein 549 [Source:HGNC Symbol;Acc:26632]                                                |
| 6662 | ENSG00000067955 | 1259.70617  | 0.312362085  | 0.10226458  | 0.006333695 | CBFB          | core-binding factor, beta subunit [Source:HGNC Symbol;Acc:1539]                                       |
| 6663 | ENSG00000149531 | 271.2890843 | 0.59945671   | 0.196273368 | 0.006338184 | FRG1B         | FSD region gene 1 family, member B [Source:HGNC Symbol;Acc:15792]                                     |
| 6664 | ENSG00000180138 | 77.51351296 | -1.011606401 | 0.331227936 | 0.006338992 | CSNK1A1L      | casein kinase 1, alpha 1-like [Source:HGNC Symbol;Acc:20289]                                          |
| 6665 | ENSG00000174807 | 28.32236767 | 1.45439133   | 0.476468807 | 0.006373454 | CD248         | CD248 molecule, endosialin [Source:HGNC Symbol;Acc:18219]                                             |
| 6666 | ENSG00000151023 | 15.36652742 | 1.665512789  | 0.545680454 | 0.006378056 | ENKUR         | enkurin, TRPC channel interacting protein [Source:HGNC Symbol;Acc:28388]                              |
| 6667 | ENSG00000196268 | 1502.447609 | -0.285972065 | 0.093700404 | 0.006381195 | ZNF493        | zinc finger protein 493 [Source:HGNC Symbol;Acc:23708]                                                |
| 6668 | ENSG00000086619 | 634.7696864 | 0.399714928  | 0.130973504 | 0.006382513 | ERO1LB        | ERO1-like beta ( <i>S. cerevisiae</i> ) [Source:HGNC Symbol;Acc:14355]                                |
| 6669 | ENSG00000084092 | 342.2188491 | 0.566332937  | 0.185573785 | 0.006383308 | NOA1          | nitric oxide associated 1 [Source:HGNC Symbol;Acc:28473]                                              |
| 6670 | ENSG00000177051 | 585.8529235 | -0.454879929 | 0.149088475 | 0.006397679 | FBXO46        | F-box protein 46 [Source:HGNC Symbol;Acc:25069]                                                       |
| 6671 | ENSG00000251606 | 24.1297538  | 1.530944741  | 0.501888857 | 0.006411813 | CTD-2215E18.1 | Uncharacterized protein [Source:UniProtKB/TrEMBL;Acc:D6RF79]                                          |
| 6672 | ENSG00000168280 | 66.24096065 | 1.115629287  | 0.365800139 | 0.006421667 | KIF5C         | kinesin family member 5C [Source:HGNC Symbol;Acc:6325]                                                |
| 6673 | ENSG00000147853 | 609.6761504 | 0.406288119  | 0.13321847  | 0.006421667 | AK3           | adenylate kinase 3 [Source:HGNC Symbol;Acc:17376]                                                     |
| 6674 | ENSG00000262907 | 66.24142822 | 1.115605218  | 0.365799807 | 0.006421667 | KIF5C         | kinesin family member 5C [Source:HGNC Symbol;Acc:6325]                                                |
| 6675 | ENSG00000081760 | 451.4085823 | -0.497522049 | 0.163140631 | 0.006423237 | AACS          | acetoacetyl-CoA synthetase [Source:HGNC Symbol;Acc:21298]                                             |
| 6676 | ENSG00000126215 | 503.3815659 | -0.510350831 | 0.16738499  | 0.006436985 | XRCC3         | X-ray repair complementing defective repair in Chinese hamster cells 3 [Source:HGNC Symbol;Acc:12830] |
| 6677 | ENSG00000064489 | 181.4086999 | -0.734612599 | 0.241089531 | 0.006477082 | MEF2BNB-MEF2B | MEF2BNB-MEF2B readthrough [Source:HGNC Symbol;Acc:39979]                                              |
| 6678 | ENSG00000174695 | 2115.866067 | -0.275043908 | 0.090289796 | 0.006493766 | TMEM167A      | transmembrane protein 167A [Source:HGNC Symbol;Acc:28330]                                             |
| 6679 | ENSG00000128918 | 60.33638688 | -1.124367385 | 0.369204003 | 0.006511223 | ALDH1A2       | aldehyde dehydrogenase 1 family, member A2 [Source:HGNC Symbol;Acc:15472]                             |
| 6680 | ENSG00000107175 | 313.0691257 | 0.534269748  | 0.175497369 | 0.006533335 | CREB3         | cAMP responsive element binding protein 3 [Source:HGNC Symbol;Acc:2347]                               |
| 6681 | ENSG00000227780 | 129.733637  | 0.836866172  | 0.275152811 | 0.006593714 | ZBTB22        | zinc finger and BTB domain containing 22 [Source:HGNC Symbol;Acc:13085]                               |
| 6682 | ENSG00000229253 | 129.7336358 | 0.836866063  | 0.275152811 | 0.006593714 | ZBTB22        | zinc finger and BTB domain containing 22 [Source:HGNC Symbol;Acc:13085]                               |
| 6683 | ENSG00000124209 | 1022.367594 | 0.327394911  | 0.107657691 | 0.006601188 | RAB22A        | RAB22A, member RAS oncogene family [Source:HGNC Symbol;Acc:9764]                                      |
| 6684 | ENSG00000155970 | 31.00272346 | 1.505861453  | 0.495204204 | 0.006604219 | MICU3         | mitochondrial calcium uptake family, member 3 [Source:HGNC Symbol;Acc:27820]                          |
| 6685 | ENSG00000198276 | 338.4732583 | 0.596656732  | 0.196215239 | 0.006604595 | UCKL1         | uridine-cytidine kinase 1-like 1 [Source:HGNC Symbol;Acc:15938]                                       |
| 6686 | ENSG00000205670 | 196.5032599 | 0.66376865   | 0.218416769 | 0.006643793 | SMIM11        | small integral membrane protein 11 [Source:HGNC Symbol;Acc:1293]                                      |

|      |                 |             |              |             |             |              |                                                                                                   |
|------|-----------------|-------------|--------------|-------------|-------------|--------------|---------------------------------------------------------------------------------------------------|
| 6687 | ENSG00000261652 | 20.28963853 | -1.546369237 | 0.508963739 | 0.006658924 | C15orf65     | chromosome 15 open reading frame 65 [Source:HGNC Symbol;Acc:44654]                                |
| 6688 | ENSG00000159882 | 445.25614   | 0.466058168  | 0.153413844 | 0.006665782 | ZNF230       | zinc finger protein 230 [Source:HGNC Symbol;Acc:13024]                                            |
| 6689 | ENSG00000211777 | 27.26249622 | 1.523678069  | 0.501605194 | 0.006671654 | TRAV3        | T cell receptor alpha variable 3 (gene/pseudogene) [Source:HGNC Symbol;Acc:12128]                 |
| 6690 | ENSG00000102900 | 773.4252973 | -0.4242012   | 0.13968481  | 0.006687468 | NUP93        | nucleoporin 93kDa [Source:HGNC Symbol;Acc:28958]                                                  |
| 6691 | ENSG0000080561  | 35.64364152 | 1.402545087  | 0.461990168 | 0.006707997 | MID2         | midline 2 [Source:HGNC Symbol;Acc:7096]                                                           |
| 6692 | ENSG00000177984 | 63.81467504 | -1.088959856 | 0.358788198 | 0.006724175 | LCN15        | lipocalin 15 [Source:HGNC Symbol;Acc:33777]                                                       |
| 6693 | ENSG00000110944 | 46.50715894 | 1.250402948  | 0.41231317  | 0.006778025 | IL23A        | interleukin 23, alpha subunit p19 [Source:HGNC Symbol;Acc:15488]                                  |
| 6694 | ENSG00000174083 | 308.533029  | -0.539697856 | 0.177975688 | 0.006782153 | PIK3R6       | phosphoinositide-3-kinase, regulatory subunit 6 [Source:HGNC Symbol;Acc:27101]                    |
| 6695 | ENSG00000188389 | 21.7074115  | 1.554718488  | 0.512710967 | 0.006782843 | PDCD1        | programmed cell death 1 [Source:HGNC Symbol;Acc:8760]                                             |
| 6696 | ENSG00000165494 | 3031.704937 | -0.242732165 | 0.080072553 | 0.006803116 | PCF11        | PCF11 cleavage and polyadenylation factor subunit [Source:HGNC Symbol;Acc:30097]                  |
| 6697 | ENSG00000178950 | 2554.031703 | -0.316486823 | 0.104434001 | 0.006822256 | GAK          | cyclin G associated kinase [Source:HGNC Symbol;Acc:4113]                                          |
| 6698 | ENSG00000230635 | 11.54338485 | -1.712024747 | 0.565110739 | 0.006843202 | CYP4F60P     | cytochrome P450, family 4, subfamily F, polypeptide 60, pseudogene [Source:HGNC Symbol;Acc:42468] |
| 6699 | ENSG00000242324 | 76.37990207 | -1.013803432 | 0.334653388 | 0.006845016 | RP4-576H24.2 |                                                                                                   |
| 6700 | ENSG00000164181 | 44.18473845 | 1.27423558   | 0.420694691 | 0.006855989 | ELOVL7       | ELOVL fatty acid elongase 7 [Source:HGNC Symbol;Acc:26292]                                        |
| 6701 | ENSG00000170734 | 383.5257867 | 0.489961342  | 0.161788623 | 0.006865508 | POLH         | polymerase (DNA directed), eta [Source:HGNC Symbol;Acc:9181]                                      |
| 6702 | ENSG00000256060 | 97.07574392 | 0.90570717   | 0.299073654 | 0.006865508 | TRAPPC2P1    | trafficking protein particle complex 2 pseudogene 1 [Source:HGNC Symbol;Acc:10710]                |
| 6703 | ENSG00000214189 | 517.7621073 | -0.430745925 | 0.142248529 | 0.006870229 | ZNF788       | zinc finger family member 788 [Source:HGNC Symbol;Acc:33112]                                      |
| 6704 | ENSG00000145833 | 2000.445252 | -0.28316885  | 0.093520923 | 0.006875023 | DDX46        | DEAD (Asp-Glu-Ala-Asp) box polypeptide 46 [Source:HGNC Symbol;Acc:18681]                          |
| 6705 | ENSG00000260789 | 21.81843116 | 1.642428785  | 0.542525341 | 0.006885134 | GPSM1        | G-protein signaling modulator 1 [Source:HGNC Symbol;Acc:17858]                                    |
| 6706 | ENSG00000108039 | 886.1878285 | 0.372329523  | 0.122995733 | 0.006888727 | XPNPEP1      | X-prolyl aminopeptidase (aminopeptidase P) 1, soluble [Source:HGNC Symbol;Acc:12822]              |
| 6707 | ENSG00000229590 | 14.52343694 | 1.676656186  | 0.553959064 | 0.006898326 | MSX2P1       | msh homeobox 2 pseudogene 1 [Source:HGNC Symbol;Acc:24976]                                        |
| 6708 | ENSG00000148655 | 106.3818156 | -1.028951122 | 0.339962211 | 0.006898326 | C10orf11     | chromosome 10 open reading frame 11 [Source:HGNC Symbol;Acc:23405]                                |
| 6709 | ENSG00000131459 | 9.780896063 | 1.71204541   | 0.565682194 | 0.006899721 | GFPT2        | glutamine-fructose-6-phosphate transaminase 2 [Source:HGNC Symbol;Acc:4242]                       |
| 6710 | ENSG00000166140 | 655.9022257 | -0.385545206 | 0.127389287 | 0.006899721 | ZFYVE19      | zinc finger, FYVE domain containing 19 [Source:HGNC Symbol;Acc:20758]                             |
| 6711 | ENSG00000169612 | 549.2259681 | 0.447692522  | 0.147926809 | 0.006900195 | FAM103A1     | family with sequence similarity 103, member A1 [Source:HGNC Symbol;Acc:31022]                     |
| 6712 | ENSG00000125450 | 1095.689914 | -0.360830344 | 0.119230246 | 0.006901766 | NUP85        | nucleoporin 85kDa [Source:HGNC Symbol;Acc:8734]                                                   |
| 6713 | ENSG00000163516 | 2797.853679 | 0.214278283  | 0.070812596 | 0.00690853  | ANKZF1       | ankyrin repeat and zinc finger domain containing 1 [Source:HGNC Symbol;Acc:25527]                 |
| 6714 | ENSG00000220804 | 188.4705479 | -0.687874874 | 0.227358058 | 0.006918419 | AC093642.5   |                                                                                                   |

|      |                 |             |              |             |             |               |                                                                                              |
|------|-----------------|-------------|--------------|-------------|-------------|---------------|----------------------------------------------------------------------------------------------|
| 6715 | ENSG00000134779 | 916.4859066 | -0.326847215 | 0.108036436 | 0.006921303 | TPGS2         | tubulin polyglutamylase complex subunit 2 [Source:HGNC Symbol;Acc:24561]                     |
| 6716 | ENSG00000205356 | 887.7883446 | 0.508482158  | 0.168083107 | 0.006923922 | TECPR1        | tectonin beta-propeller repeat containing 1 [Source:HGNC Symbol;Acc:22214]                   |
| 6717 | ENSG00000105221 | 2388.854006 | 0.27183635   | 0.089860211 | 0.006924734 | AKT2          | v-akt murine thymoma viral oncogene homolog 2 [Source:HGNC Symbol;Acc:392]                   |
| 6718 | ENSG00000132849 | 232.8153688 | 0.71391187   | 0.236039193 | 0.006936408 | INADL         | InaD-like (Drosophila) [Source:HGNC Symbol;Acc:28881]                                        |
| 6719 | ENSG00000130332 | 376.8309453 | 0.512761446  | 0.169560233 | 0.00694642  | LSM7          | LSM7 homolog, U6 small nuclear RNA associated (S. cerevisiae) [Source:HGNC Symbol;Acc:20470] |
| 6720 | ENSG00000100354 | 2911.514033 | -0.230722491 | 0.076297764 | 0.006947502 | TNRC6B        | trinucleotide repeat containing 6B [Source:HGNC Symbol;Acc:29190]                            |
| 6721 | ENSG00000099817 | 722.0392698 | 0.438118542  | 0.144893622 | 0.006952187 | POLR2E        | polymerase (RNA) II (DNA directed) polypeptide E, 25kDa [Source:HGNC Symbol;Acc:9192]        |
| 6722 | ENSG00000178229 | 84.4868912  | 0.994962456  | 0.32905913  | 0.006952691 | ZNF543        | zinc finger protein 543 [Source:HGNC Symbol;Acc:25281]                                       |
| 6723 | ENSG00000133393 | 518.1716265 | -0.440624642 | 0.145747558 | 0.006962102 | FOPNL         | FGFR1OP N-terminal like [Source:HGNC Symbol;Acc:26435]                                       |
| 6724 | ENSG00000085365 | 467.8341882 | 0.526200104  | 0.174073371 | 0.006968901 | SCAMP1        | secretory carrier membrane protein 1 [Source:HGNC Symbol;Acc:10563]                          |
| 6725 | ENSG00000126858 | 1347.788246 | -0.313254913 | 0.103659718 | 0.00698884  | RHOT1         | ras homolog family member T1 [Source:HGNC Symbol;Acc:21168]                                  |
| 6726 | ENSG00000179933 | 1228.32908  | -0.371449262 | 0.122943226 | 0.007002748 | C14orf119     | chromosome 14 open reading frame 119 [Source:HGNC Symbol;Acc:20270]                          |
| 6727 | ENSG00000135211 | 368.6911042 | -0.496829474 | 0.164486804 | 0.00702081  | TMEM60        | transmembrane protein 60 [Source:HGNC Symbol;Acc:21754]                                      |
| 6728 | ENSG00000183655 | 22.43262929 | 1.565177171  | 0.518239682 | 0.007026774 | KLHL25        | kelch-like family member 25 [Source:HGNC Symbol;Acc:25732]                                   |
| 6729 | ENSG00000078070 | 445.5954112 | -0.485119178 | 0.160628914 | 0.00702704  | MCCC1         | methylcrotonoyl-CoA carboxylase 1 (alpha) [Source:HGNC Symbol;Acc:6936]                      |
| 6730 | ENSG00000162819 | 1745.497046 | 0.26251594   | 0.086928445 | 0.00703064  | BROX          | BRO1 domain and CAAX motif containing [Source:HGNC Symbol;Acc:26512]                         |
| 6731 | ENSG00000104894 | 8011.068047 | -0.185296927 | 0.061359067 | 0.00703064  | CD37          | CD37 molecule [Source:HGNC Symbol;Acc:1666]                                                  |
| 6732 | ENSG00000143257 | 29.12796445 | -1.437835286 | 0.476150008 | 0.00703349  | NR1I3         | nuclear receptor subfamily 1, group I, member 3 [Source:HGNC Symbol;Acc:7969]                |
| 6733 | ENSG00000163191 | 20074.70766 | -0.1284301   | 0.042542964 | 0.007052852 | S100A11       | S100 calcium binding protein A11 [Source:HGNC Symbol;Acc:10488]                              |
| 6734 | ENSG00000153790 | 88.79371057 | 0.950036339  | 0.31477405  | 0.00706764  | C7orf31       | chromosome 7 open reading frame 31 [Source:HGNC Symbol;Acc:21722]                            |
| 6735 | ENSG00000135047 | 57.87708557 | -1.149051171 | 0.380719242 | 0.007067685 | CTSL          | cathepsin L [Source:HGNC Symbol;Acc:2537]                                                    |
| 6736 | ENSG00000251546 | 189.7127732 | -0.728550446 | 0.241550612 | 0.007112628 | IGKV1D-39     | immunoglobulin kappa variable 1D-39 [Source:HGNC Symbol;Acc:5756]                            |
| 6737 | ENSG00000156414 | 111.8273371 | -1.023608637 | 0.339424585 | 0.007121488 | TDRD9         | tudor domain containing 9 [Source:HGNC Symbol;Acc:20122]                                     |
| 6738 | ENSG00000197713 | 432.5509871 | -0.452390115 | 0.150058628 | 0.007143045 | RPE           | ribose-5-phosphate-3-epimerase [Source:HGNC Symbol;Acc:10293]                                |
| 6739 | ENSG00000272708 | 274.1550307 | -0.648079521 | 0.214972833 | 0.007143197 | CEACAM4       | carcinoembryonic antigen-related cell adhesion molecule 4 [Source:HGNC Symbol;Acc:1816]      |
| 6740 | ENSG00000186184 | 1124.546936 | 0.320238108  | 0.106266591 | 0.007169715 | POLR1D        | polymerase (RNA) I polypeptide D, 16kDa [Source:HGNC Symbol;Acc:20422]                       |
| 6741 | ENSG00000260080 | 18.77895684 | 1.601601092  | 0.531488246 | 0.007171204 | TRBV7-3       | T cell receptor beta variable 7-3 [Source:HGNC Symbol;Acc:12237]                             |
| 6742 | ENSG00000239557 | 38.42498142 | -1.318526561 | 0.437744836 | 0.007201815 | RP11-168J18.6 |                                                                                              |

|      |                 |             |              |             |             |            |                                                                                                                                  |
|------|-----------------|-------------|--------------|-------------|-------------|------------|----------------------------------------------------------------------------------------------------------------------------------|
| 6743 | ENSG00000147872 | 452.8324931 | 0.477083274  | 0.158396992 | 0.007204135 | PLIN2      | perilipin 2 [Source:HGNC Symbol;Acc:248]                                                                                         |
| 6744 | ENSG00000090612 | 244.9694219 | 0.647217858  | 0.214904647 | 0.007210076 | ZNF268     | zinc finger protein 268 [Source:HGNC Symbol;Acc:13061]                                                                           |
| 6745 | ENSG00000183134 | 34.18198281 | 1.346745135  | 0.447311419 | 0.007230317 | PTGDR2     | prostaglandin D2 receptor 2 [Source:HGNC Symbol;Acc:4502]                                                                        |
| 6746 | ENSG00000115808 | 1648.426053 | -0.293027968 | 0.097338028 | 0.007237319 | STRN       | striatin, calmodulin binding protein [Source:HGNC Symbol;Acc:11424]                                                              |
| 6747 | ENSG00000184743 | 885.8955177 | 0.334867909  | 0.111244621 | 0.007241537 | ATL3       | atlastin GTPase 3 [Source:HGNC Symbol;Acc:24526]                                                                                 |
| 6748 | ENSG00000139946 | 1959.131462 | -0.269543045 | 0.089549773 | 0.007245566 | PELI2      | pellino E3 ubiquitin protein ligase family member 2 [Source:HGNC Symbol;Acc:8828]                                                |
| 6749 | ENSG00000262509 | 92.82204958 | 1.679612276  | 0.558193342 | 0.007267542 | BLNK       | B-cell linker [Source:HGNC Symbol;Acc:14211]                                                                                     |
| 6750 | ENSG00000186281 | 18.10129709 | 1.606779342  | 0.534120555 | 0.007284287 | GPAT2      | glycerol-3-phosphate acyltransferase 2, mitochondrial [Source:HGNC Symbol;Acc:27168]                                             |
| 6751 | ENSG00000104884 | 170.9500612 | 0.707574266  | 0.235216408 | 0.007285288 | ERCC2      | excision repair cross-complementing rodent repair deficiency, complementation group 2 [Source:HGNC Symbol;Acc:3434]              |
| 6752 | ENSG00000111912 | 879.877807  | -0.451154479 | 0.15005364  | 0.007321758 | NCOA7      | nuclear receptor coactivator 7 [Source:HGNC Symbol;Acc:21081]                                                                    |
| 6753 | ENSG00000136842 | 45.1094416  | -1.219155148 | 0.40551823  | 0.0073257   | TMOD1      | tropomodulin 1 [Source:HGNC Symbol;Acc:11871]                                                                                    |
| 6754 | ENSG00000108604 | 2149.385788 | 0.232168516  | 0.077251249 | 0.007349797 | SMARCD2    | SWI/SNF related, matrix associated, actin dependent regulator of chromatin, subfamily d, member 2 [Source:HGNC Symbol;Acc:11107] |
| 6755 | ENSG00000136271 | 1247.794129 | 0.299567802  | 0.099684248 | 0.007353595 | DDX56      | DEAD (Asp-Glu-Ala-Asp) box helicase 56 [Source:HGNC Symbol;Acc:18193]                                                            |
| 6756 | ENSG00000138134 | 348.22825   | -0.52608174  | 0.175066509 | 0.007355592 | STAMBPL1   | STAM binding protein-like 1 [Source:HGNC Symbol;Acc:24105]                                                                       |
| 6757 | ENSG00000166912 | 2144.380316 | -0.23620994  | 0.078607657 | 0.007357321 | MTMR10     | myotubularin related protein 10 [Source:HGNC Symbol;Acc:25999]                                                                   |
| 6758 | ENSG00000248835 | 118.9529954 | -0.852113867 | 0.283615423 | 0.007367204 | AL357673.1 | CDNA: FLJ21031 fis, clone CAE07336; HCG1780521; Uncharacterized protein [Source:UniProtKB/TrEMBL;Acc:Q9H7D2]                     |
| 6759 | ENSG00000196138 | 153.496673  | -0.737708978 | 0.24560503  | 0.007386235 | AC005831.1 |                                                                                                                                  |
| 6760 | ENSG00000106615 | 659.6287007 | -0.402134912 | 0.133893458 | 0.007391085 | RHEB       | Ras homolog enriched in brain [Source:HGNC Symbol;Acc:10011]                                                                     |
| 6761 | ENSG00000204256 | 837.0393047 | -0.3894784   | 0.129698193 | 0.007400573 | BRD2       | bromodomain containing 2 [Source:HGNC Symbol;Acc:1103]                                                                           |
| 6762 | ENSG00000148429 | 357.2002604 | 0.495015     | 0.164845837 | 0.007401005 | USP6NL     | USP6 N-terminal like [Source:HGNC Symbol;Acc:16858]                                                                              |
| 6763 | ENSG00000132842 | 1067.269777 | -0.350050349 | 0.116575409 | 0.007402737 | AP3B1      | adaptor-related protein complex 3, beta 1 subunit [Source:HGNC Symbol;Acc:566]                                                   |
| 6764 | ENSG00000102893 | 1571.251593 | -0.308757462 | 0.102845068 | 0.007416717 | PHKB       | phosphorylase kinase, beta [Source:HGNC Symbol;Acc:8927]                                                                         |
| 6765 | ENSG00000182704 | 112.292172  | -0.832388093 | 0.277414757 | 0.007455736 | TSKU       | tsukushi, small leucine rich proteoglycan [Source:HGNC Symbol;Acc:28850]                                                         |
| 6766 | ENSG00000162298 | 1789.115015 | -0.269615741 | 0.089866566 | 0.007462959 | SYVN1      | synovial apoptosis inhibitor 1, synoviolin [Source:HGNC Symbol;Acc:20738]                                                        |
| 6767 | ENSG00000165521 | 120.5818558 | 0.82970712   | 0.276658688 | 0.007490094 | EML5       | echinoderm microtubule associated protein like 5 [Source:HGNC Symbol;Acc:18197]                                                  |
| 6768 | ENSG00000165506 | 99.6261187  | 0.881706788  | 0.294042687 | 0.007500317 | DNAAF2     | dynein, axonemal, assembly factor 2 [Source:HGNC Symbol;Acc:20188]                                                               |
| 6769 | ENSG00000143418 | 2905.378969 | 0.212383382  | 0.070842565 | 0.007514097 | CERS2      | ceramide synthase 2 [Source:HGNC Symbol;Acc:14076]                                                                               |
| 6770 | ENSG00000133895 | 711.2942477 | 0.379554269  | 0.126609001 | 0.007515873 | MEN1       | multiple endocrine neoplasia I [Source:HGNC Symbol;Acc:7010]                                                                     |



|      |                 |             |              |             |             |                |                                                                                                 |
|------|-----------------|-------------|--------------|-------------|-------------|----------------|-------------------------------------------------------------------------------------------------|
| 6771 | ENSG00000185009 | 1307.709124 | -0.309831163 | 0.103358564 | 0.007519984 | AP3M1          | adaptor-related protein complex 3, mu 1 subunit [Source:HGNC Symbol;Acc:569]                    |
| 6772 | ENSG00000181019 | 40.79047458 | 1.267897335  | 0.422993581 | 0.007523697 | NQO1           | NAD(P)H dehydrogenase, quinone 1 [Source:HGNC Symbol;Acc:2874]                                  |
| 6773 | ENSG00000269620 | 35.78012724 | 1.356678487  | 0.452629225 | 0.007525306 | AL590560.1     | HCG1995379; Uncharacterized protein [Source:UniProtKB/TrEMBL;Acc:M0R2Y0]                        |
| 6774 | ENSG00000180376 | 686.2590177 | -0.394974854 | 0.131808913 | 0.007542898 | CCDC66         | coiled-coil domain containing 66 [Source:HGNC Symbol;Acc:27709]                                 |
| 6775 | ENSG00000185087 | 94.1746293  | -0.916450864 | 0.305842546 | 0.00754407  | FAM169B        | family with sequence similarity 169, member B [Source:HGNC Symbol;Acc:26835]                    |
| 6776 | ENSG00000204490 | 42.87742892 | -1.242216816 | 0.414750913 | 0.007570665 | TNF            | tumor necrosis factor [Source:HGNC Symbol;Acc:11892]                                            |
| 6777 | ENSG00000206439 | 42.87742892 | -1.242216816 | 0.414750913 | 0.007570665 | TNF            | tumor necrosis factor [Source:HGNC Symbol;Acc:11892]                                            |
| 6778 | ENSG00000223952 | 42.87742892 | -1.242216816 | 0.414750913 | 0.007570665 | TNF            | tumor necrosis factor [Source:HGNC Symbol;Acc:11892]                                            |
| 6779 | ENSG00000228849 | 42.87742892 | -1.242216816 | 0.414750913 | 0.007570665 | TNF            | tumor necrosis factor [Source:HGNC Symbol;Acc:11892]                                            |
| 6780 | ENSG00000230108 | 42.87742892 | -1.242216816 | 0.414750913 | 0.007570665 | TNF            | tumor necrosis factor [Source:HGNC Symbol;Acc:11892]                                            |
| 6781 | ENSG00000232810 | 42.87742892 | -1.242216816 | 0.414750913 | 0.007570665 | TNF            | tumor necrosis factor [Source:HGNC Symbol;Acc:11892]                                            |
| 6782 | ENSG00000228321 | 42.87742892 | -1.242216816 | 0.414750913 | 0.007570665 | TNF            | tumor necrosis factor [Source:HGNC Symbol;Acc:11892]                                            |
| 6783 | ENSG00000181215 | 52.77872737 | 1.203985479  | 0.40203879  | 0.007579269 | C4orf50        | chromosome 4 open reading frame 50 [Source:HGNC Symbol;Acc:33766]                               |
| 6784 | ENSG00000188039 | 39.49280721 | -1.25558202  | 0.41930795  | 0.007585229 | NWD1           | NACHT and WD repeat domain containing 1 [Source:HGNC Symbol;Acc:27619]                          |
| 6785 | ENSG00000211789 | 36.54059633 | 1.363507274  | 0.455437998 | 0.007598485 | TRAV12-2       | T cell receptor alpha variable 12-2 [Source:HGNC Symbol;Acc:12106]                              |
| 6786 | ENSG00000182405 | 145.5933188 | -0.76187159  | 0.254583817 | 0.007627833 | PGBD4          | piggyBac transposable element derived 4 [Source:HGNC Symbol;Acc:19401]                          |
| 6787 | ENSG00000016864 | 711.4120529 | 0.39477751   | 0.131920616 | 0.007628409 | GLT8D1         | glycosyltransferase 8 domain containing 1 [Source:HGNC Symbol;Acc:24870]                        |
| 6788 | ENSG00000100522 | 209.3767073 | 0.663449535  | 0.221704979 | 0.007628409 | GNPNAT1        | glucosamine-phosphate N-acetyltransferase 1 [Source:HGNC Symbol;Acc:19980]                      |
| 6789 | ENSG00000267554 | 125.2539439 | 0.818665525  | 0.273576284 | 0.007628409 | RP11-686D22.10 |                                                                                                 |
| 6790 | ENSG00000099992 | 600.2888042 | 0.425279336  | 0.142270059 | 0.007708086 | TBC1D10A       | TBC1 domain family, member 10A [Source:HGNC Symbol;Acc:23609]                                   |
| 6791 | ENSG00000186395 | 169.3103981 | 0.734050938  | 0.245616919 | 0.007723086 | KRT10          | keratin 10 [Source:HGNC Symbol;Acc:6413]                                                        |
| 6792 | ENSG00000129646 | 221.4792028 | -0.645037609 | 0.215846363 | 0.007726753 | QRICH2         | glutamine rich 2 [Source:HGNC Symbol;Acc:25326]                                                 |
| 6793 | ENSG00000112425 | 97.19196444 | 0.919237292  | 0.307615659 | 0.007729288 | EPM2A          | epilepsy, progressive myoclonus type 2A, Lafora disease (laforin) [Source:HGNC Symbol;Acc:3413] |
| 6794 | ENSG00000198892 | 23.70468451 | 1.515079154  | 0.507053243 | 0.007734666 | SHISA4         | shisa family member 4 [Source:HGNC Symbol;Acc:27139]                                            |
| 6795 | ENSG00000254986 | 443.3092522 | -0.459643293 | 0.153835315 | 0.007736466 | DPP3           | dipeptidyl-peptidase 3 [Source:HGNC Symbol;Acc:3008]                                            |
| 6796 | ENSG00000130489 | 395.4462495 | 0.540649541  | 0.180990887 | 0.007753759 | SCO2           | SCO2 cytochrome c oxidase assembly protein [Source:HGNC Symbol;Acc:10604]                       |
| 6797 | ENSG00000159885 | 85.65485601 | 0.959230119  | 0.321152803 | 0.007761002 | ZNF222         | zinc finger protein 222 [Source:HGNC Symbol;Acc:13015]                                          |
| 6798 | ENSG00000265551 | 940.1901013 | -0.330702135 | 0.110729367 | 0.007766305 | FAM21C         | family with sequence similarity 21, member C [Source:HGNC Symbol;Acc:23414]                     |

|      |                 |             |              |             |             |               |                                                                                                                                     |
|------|-----------------|-------------|--------------|-------------|-------------|---------------|-------------------------------------------------------------------------------------------------------------------------------------|
| 6799 | ENSG00000231345 | 106.1322313 | -0.860003156 | 0.288063536 | 0.007793068 | RP11-564C4.6  |                                                                                                                                     |
| 6800 | ENSG00000261499 | 225.6615867 | -0.608265981 | 0.203744283 | 0.007793068 | CH17-260O16.2 |                                                                                                                                     |
| 6801 | ENSG00000177106 | 45.27791034 | 1.26701224   | 0.424426257 | 0.007796612 | EPS8L2        | EPS8-like 2 [Source:HGNC Symbol;Acc:21296]                                                                                          |
| 6802 | ENSG00000101442 | 210.7009142 | 0.664654063  | 0.222651201 | 0.007796612 | ACTR5         | ARPS actin-related protein 5 homolog (yeast) [Source:HGNC Symbol;Acc:14671]                                                         |
| 6803 | ENSG00000170779 | 222.164401  | -0.614390757 | 0.205814722 | 0.007796612 | CDC44         | cell division cycle associated 4 [Source:HGNC Symbol;Acc:14625]                                                                     |
| 6804 | ENSG00000271723 | 34.23065963 | -1.455897816 | 0.487839069 | 0.007815443 | MROH7-TTC4    | MROH7-TTC4 readthrough (NMD candidate) [Source:HGNC Symbol;Acc:49180]                                                               |
| 6805 | ENSG00000166398 | 279.1615528 | 0.589293261  | 0.197525144 | 0.007839819 | KIAA0355      | KIAA0355 [Source:HGNC Symbol;Acc:29016]                                                                                             |
| 6806 | ENSG00000108468 | 1415.591079 | -0.269758596 | 0.090425797 | 0.007843268 | CBX1          | chromobox homolog 1 [Source:HGNC Symbol;Acc:1551]                                                                                   |
| 6807 | ENSG00000222976 | 904.0786041 | -0.350552836 | 0.117536498 | 0.007860122 | ZNF839        | zinc finger protein 839 [Source:HGNC Symbol;Acc:20345]                                                                              |
| 6808 | ENSG00000160999 | 29.35557635 | 1.418481179  | 0.475762167 | 0.007884932 | SH2B2         | SH2B adaptor protein 2 [Source:HGNC Symbol;Acc:17381]                                                                               |
| 6809 | ENSG00000167487 | 63.60097353 | 1.068422295  | 0.358398628 | 0.007893867 | KLHL26        | kelch-like family member 26 [Source:HGNC Symbol;Acc:25623]                                                                          |
| 6810 | ENSG00000269361 | 48.04458156 | -1.253707862 | 0.420568415 | 0.0078957   | DSTNP2        | destrin (actin depolymerizing factor) pseudogene 2 [Source:HGNC Symbol;Acc:34546]                                                   |
| 6811 | ENSG00000107223 | 1609.075047 | 0.320865866  | 0.10764899  | 0.007902708 | EDF1          | endothelial differentiation-related factor 1 [Source:HGNC Symbol;Acc:3164]                                                          |
| 6812 | ENSG00000196510 | 1174.432268 | -0.384696073 | 0.12909916  | 0.007922681 | ANAPC7        | anaphase promoting complex subunit 7 [Source:HGNC Symbol;Acc:17380]                                                                 |
| 6813 | ENSG00000174485 | 867.8448045 | -0.391518148 | 0.131399183 | 0.007927748 | DENND4A       | DENN/MADD domain containing 4A [Source:HGNC Symbol;Acc:24321]                                                                       |
| 6814 | ENSG00000105298 | 322.1682232 | 0.599528345  | 0.201233587 | 0.007935461 | CACTIN        | cactin, spliceosome C complex subunit [Source:HGNC Symbol;Acc:29938]                                                                |
| 6815 | ENSG00000106066 | 835.3997094 | 0.338126198  | 0.113496689 | 0.007936717 | CPVL          | carboxypeptidase, vitellogenic-like [Source:HGNC Symbol;Acc:14399]                                                                  |
| 6816 | ENSG00000205021 | 179.0718267 | 0.722504971  | 0.242664273 | 0.007981968 | CCL3L1        | chemokine (C-C motif) ligand 3-like 1 [Source:HGNC Symbol;Acc:10628]                                                                |
| 6817 | ENSG00000111269 | 761.1436349 | 0.36433995   | 0.122372936 | 0.007983222 | CREBL2        | cAMP responsive element binding protein-like 2 [Source:HGNC Symbol;Acc:2350]                                                        |
| 6818 | ENSG00000198720 | 27.49196155 | 1.42272102   | 0.478154978 | 0.008030426 | ANKRD13B      | ankyrin repeat domain 13B [Source:HGNC Symbol;Acc:26363]                                                                            |
| 6819 | ENSG00000101343 | 879.3618698 | 0.370874445  | 0.124655743 | 0.008035787 | CRNKL1        | crooked neck pre-mRNA splicing factor 1 [Source:HGNC Symbol;Acc:15762]                                                              |
| 6820 | ENSG00000106443 | 394.1630483 | 0.600913745  | 0.202075779 | 0.008073577 | PHF14         | PHD finger protein 14 [Source:HGNC Symbol;Acc:22203]                                                                                |
| 6821 | ENSG00000213121 | 389.9628361 | -0.500840471 | 0.168461496 | 0.008090262 | AL590867.1    | Uncharacterized protein; cDNA FLJ59044, highly similar to LINE-1 reverse transcriptase homolog [Source:UniProtKB/TrEMBL;Acc:B7Z5F2] |
| 6822 | ENSG00000273136 | 517.2615236 | 0.518457265  | 0.174433134 | 0.008109335 | AC253572.1    | Neuroblastoma breakpoint family member 1 [Source:UniProtKB/TrEMBL;Acc:S4R3H5]                                                       |
| 6823 | ENSG00000131480 | 657.4393579 | 0.392396845  | 0.13202261  | 0.008109335 | AOC2          | amine oxidase, copper containing 2 (retina-specific) [Source:HGNC Symbol;Acc:549]                                                   |
| 6824 | ENSG00000242265 | 17.81014958 | 1.603136976  | 0.539383107 | 0.008109335 | PEG10         | paternally expressed 10 [Source:HGNC Symbol;Acc:14005]                                                                              |
| 6825 | ENSG00000169683 | 165.9874971 | -0.71266322  | 0.239782501 | 0.008109335 | LRRC45        | leucine rich repeat containing 45 [Source:HGNC Symbol;Acc:28302]                                                                    |
| 6826 | ENSG00000124783 | 3041.896019 | -0.217883495 | 0.073324015 | 0.008124204 | SSR1          | signal sequence receptor, alpha [Source:HGNC Symbol;Acc:11323]                                                                      |

|      |                 |             |              |             |             |          |                                                                                                       |
|------|-----------------|-------------|--------------|-------------|-------------|----------|-------------------------------------------------------------------------------------------------------|
| 6827 | ENSG00000125968 | 22.91884074 | -1.469067019 | 0.494404458 | 0.008126428 | ID1      | inhibitor of DNA binding 1, dominant negative helix-loop-helix protein [Source:HGNC Symbol;Acc:5360]  |
| 6828 | ENSG00000241859 | 33.34687559 | -1.427968901 | 0.480660527 | 0.008139539 | KALP     | Kallmann syndrome sequence pseudogene [Source:HGNC Symbol;Acc:6214]                                   |
| 6829 | ENSG00000107331 | 1444.615889 | 0.394808752  | 0.132899017 | 0.008141119 | ABCA2    | ATP-binding cassette, sub-family A (ABC1), member 2 [Source:HGNC Symbol;Acc:32]                       |
| 6830 | ENSG00000163281 | 284.5288425 | 0.607890835  | 0.20464254  | 0.008146333 | GNPDA2   | glucosamine-6-phosphate deaminase 2 [Source:HGNC Symbol;Acc:21526]                                    |
| 6831 | ENSG00000103111 | 1941.961404 | -0.258872044 | 0.087154216 | 0.008151114 | MON1B    | MON1 secretory trafficking family member B [Source:HGNC Symbol;Acc:25020]                             |
| 6832 | ENSG00000099785 | 625.9151113 | 0.414706762  | 0.139625289 | 0.0081535   | MARCH2   | membrane-associated ring finger (C3HC4) 2, E3 ubiquitin protein ligase [Source:HGNC Symbol;Acc:28038] |
| 6833 | ENSG00000156876 | 267.3904685 | -0.60187738  | 0.202776174 | 0.008204337 | SASS6    | spindle assembly 6 homolog (C. elegans) [Source:HGNC Symbol;Acc:25403]                                |
| 6834 | ENSG00000262924 | 278.99349   | 0.587038697  | 0.197813535 | 0.008217808 | KIAA0355 | KIAA0355 [Source:HGNC Symbol;Acc:29016]                                                               |
| 6835 | ENSG00000172661 | 939.9687624 | -0.329153714 | 0.11094609  | 0.008239273 | FAM21C   | family with sequence similarity 21, member C [Source:HGNC Symbol;Acc:23414]                           |
| 6836 | ENSG00000106049 | 224.9038255 | 0.642279565  | 0.216560576 | 0.0082641   | HIBADH   | 3-hydroxyisobutyrate dehydrogenase [Source:HGNC Symbol;Acc:4907]                                      |
| 6837 | ENSG00000223833 | 24.03637528 | 1.464604053  | 0.494295305 | 0.008338567 | NCR3     | natural cytotoxicity triggering receptor 3 [Source:HGNC Symbol;Acc:19077]                             |
| 6838 | ENSG00000196663 | 1883.393088 | 0.253523371  | 0.085569021 | 0.00834332  | TECPR2   | tectonin beta-propeller repeat containing 2 [Source:HGNC Symbol;Acc:19957]                            |
| 6839 | ENSG00000184863 | 4089.485529 | 0.181804586  | 0.061367237 | 0.008348234 | RBM33    | RNA binding motif protein 33 [Source:HGNC Symbol;Acc:27223]                                           |
| 6840 | ENSG00000237808 | 24.0355207  | 1.464369292  | 0.494299252 | 0.008348421 | NCR3     | natural cytotoxicity triggering receptor 3 [Source:HGNC Symbol;Acc:19077]                             |
| 6841 | ENSG00000093010 | 447.1926468 | 0.528401854  | 0.178383592 | 0.00835668  | COMT     | catechol-O-methyltransferase [Source:HGNC Symbol;Acc:2228]                                            |
| 6842 | ENSG00000197816 | 295.9712133 | 0.558022105  | 0.188392747 | 0.00835957  | CCDC180  | coiled-coil domain containing 180 [Source:HGNC Symbol;Acc:29303]                                      |
| 6843 | ENSG00000143486 | 30.56451609 | 1.433501543  | 0.483976507 | 0.008360818 | EIF2D    | eukaryotic translation initiation factor 2D [Source:HGNC Symbol;Acc:6583]                             |
| 6844 | ENSG00000151150 | 223.4850203 | 0.796300548  | 0.268870662 | 0.008367059 | ANK3     | ankyrin 3, node of Ranvier (ankyrin G) [Source:HGNC Symbol;Acc:494]                                   |
| 6845 | ENSG00000253910 | 13.86390133 | 1.646219398  | 0.555942885 | 0.008379938 | PCDHGB2  | protocadherin gamma subfamily B, 2 [Source:HGNC Symbol;Acc:8709]                                      |
| 6846 | ENSG00000130939 | 1785.833489 | -0.245942334 | 0.083061538 | 0.008383207 | UBE4B    | ubiquitination factor E4B [Source:HGNC Symbol;Acc:12500]                                              |
| 6847 | ENSG00000109919 | 597.0613112 | -0.4315344   | 0.14578124  | 0.008404187 | MTCH2    | mitochondrial carrier 2 [Source:HGNC Symbol;Acc:17587]                                                |
| 6848 | ENSG00000175550 | 877.5408099 | 0.409035512  | 0.138199413 | 0.008413105 | DRAP1    | DR1-associated protein 1 (negative cofactor 2 alpha) [Source:HGNC Symbol;Acc:3019]                    |
| 6849 | ENSG00000204217 | 506.1782894 | 0.428601731  | 0.144810911 | 0.008413105 | BMPR2    | bone morphogenetic protein receptor, type II (serine/threonine kinase) [Source:HGNC Symbol;Acc:1078]  |
| 6850 | ENSG00000109066 | 364.5566043 | -0.561616983 | 0.189781599 | 0.008424259 | TMEM104  | transmembrane protein 104 [Source:HGNC Symbol;Acc:25984]                                              |
| 6851 | ENSG00000109854 | 872.7170026 | -0.335334333 | 0.113336556 | 0.00843759  | HTATIP2  | HIV-1 Tat interactive protein 2, 30kDa [Source:HGNC Symbol;Acc:16637]                                 |
| 6852 | ENSG00000160953 | 371.2893299 | 0.51376786   | 0.173675176 | 0.008451069 | MUM1     | melanoma associated antigen (mutated) 1 [Source:HGNC Symbol;Acc:29641]                                |
| 6853 | ENSG00000173991 | 103.9224658 | -0.841724868 | 0.284549264 | 0.008452916 | TCAP     | titin-cap [Source:HGNC Symbol;Acc:11610]                                                              |
| 6854 | ENSG00000152042 | 676.1223448 | -0.399334386 | 0.134999666 | 0.008453265 | NBPF11   | neuroblastoma breakpoint family, member 11 [Source:HGNC Symbol;Acc:31993]                             |

|      |                 |             |              |             |             |         |                                                                                                |
|------|-----------------|-------------|--------------|-------------|-------------|---------|------------------------------------------------------------------------------------------------|
| 6855 | ENSG00000158473 | 233.5386664 | 0.61590937   | 0.208218442 | 0.008453265 | CD1D    | CD1d molecule [Source:HGNC Symbol;Acc:1637]                                                    |
| 6856 | ENSG00000248593 | 47.7958221  | -1.242891125 | 0.420194825 | 0.008454877 | DSTNP2  | destrin (actin depolymerizing factor) pseudogene 2 [Source:HGNC Symbol;Acc:34546]              |
| 6857 | ENSG00000176014 | 148.8442846 | -0.707117247 | 0.23910943  | 0.00847003  | TUBB6   | tubulin, beta 6 class V [Source:HGNC Symbol;Acc:20776]                                         |
| 6858 | ENSG00000089177 | 111.5514883 | 0.856003895  | 0.289489916 | 0.008478605 | KIF16B  | kinesin family member 16B [Source:HGNC Symbol;Acc:15869]                                       |
| 6859 | ENSG00000136997 | 764.8022811 | 0.349491329  | 0.118211147 | 0.008489417 | MYC     | v-myc avian myelocytomatosis viral oncogene homolog [Source:HGNC Symbol;Acc:7553]              |
| 6860 | ENSG00000127995 | 431.5291198 | 0.470971994  | 0.159391482 | 0.008534752 | CASD1   | CAS1 domain containing 1 [Source:HGNC Symbol;Acc:16014]                                        |
| 6861 | ENSG00000138175 | 180.6076521 | 0.685424389  | 0.232013972 | 0.008549432 | ARL3    | ADP-ribosylation factor-like 3 [Source:HGNC Symbol;Acc:694]                                    |
| 6862 | ENSG00000001497 | 600.6796949 | 0.410440428  | 0.138979617 | 0.008575808 | LAS1L   | LAS1-like ( <i>S. cerevisiae</i> ) [Source:HGNC Symbol;Acc:25726]                              |
| 6863 | ENSG00000118640 | 2046.506082 | -0.261834118 | 0.088670545 | 0.008584416 | VAMP8   | vesicle-associated membrane protein 8 [Source:HGNC Symbol;Acc:12647]                           |
| 6864 | ENSG00000138411 | 162.5288916 | -0.786144779 | 0.266284036 | 0.00860009  | HECW2   | HECT, C2 and WW domain containing E3 ubiquitin protein ligase 2 [Source:HGNC Symbol;Acc:29853] |
| 6865 | ENSG00000113790 | 55.65058969 | -1.162927484 | 0.393925446 | 0.008602398 | EHHADH  | enoyl-CoA, hydratase/3-hydroxyacyl CoA dehydrogenase [Source:HGNC Symbol;Acc:3247]             |
| 6866 | ENSG00000130402 | 5496.32305  | -0.198935789 | 0.067400247 | 0.008617663 | ACTN4   | actinin, alpha 4 [Source:HGNC Symbol;Acc:166]                                                  |
| 6867 | ENSG00000112137 | 209.6860236 | -0.614715839 | 0.208296302 | 0.008627524 | PHACTR1 | phosphatase and actin regulator 1 [Source:HGNC Symbol;Acc:20990]                               |
| 6868 | ENSG00000154263 | 62.64696627 | -1.221370538 | 0.414090207 | 0.008671984 | ABCA10  | ATP-binding cassette, sub-family A (ABC1), member 10 [Source:HGNC Symbol;Acc:30]               |
| 6869 | ENSG00000164283 | 12.33676936 | 1.645144711  | 0.557869724 | 0.008686201 | ESM1    | endothelial cell-specific molecule 1 [Source:HGNC Symbol;Acc:3466]                             |
| 6870 | ENSG00000132294 | 1272.549728 | 0.292510845  | 0.099209571 | 0.008700769 | EFR3A   | EFR3 homolog A ( <i>S. cerevisiae</i> ) [Source:HGNC Symbol;Acc:28970]                         |
| 6871 | ENSG00000250722 | 51.51474488 | -1.160388589 | 0.393631972 | 0.008713903 | SEPP1   | selenoprotein P, plasma, 1 [Source:HGNC Symbol;Acc:10751]                                      |
| 6872 | ENSG00000109118 | 3741.027673 | 0.218310361  | 0.074068978 | 0.008727009 | PHF12   | PHD finger protein 12 [Source:HGNC Symbol;Acc:20816]                                           |
| 6873 | ENSG00000090905 | 1563.24126  | -0.260396155 | 0.088360531 | 0.008737572 | TNRC6A  | trinucleotide repeat containing 6A [Source:HGNC Symbol;Acc:11969]                              |
| 6874 | ENSG00000177485 | 329.675973  | 0.530352125  | 0.180045332 | 0.008773518 | ZBTB33  | zinc finger and BTB domain containing 33 [Source:HGNC Symbol;Acc:16682]                        |
| 6875 | ENSG00000236697 | 1882.46266  | -0.247787553 | 0.084123799 | 0.008775452 | GPSM3   | G-protein signaling modulator 3 [Source:HGNC Symbol;Acc:13945]                                 |
| 6876 | ENSG00000213654 | 1882.462627 | -0.247786575 | 0.084123754 | 0.008775452 | GPSM3   | G-protein signaling modulator 3 [Source:HGNC Symbol;Acc:13945]                                 |
| 6877 | ENSG00000211710 | 16.7260206  | 1.593530624  | 0.541043387 | 0.008778486 | TRBV4-1 | T cell receptor beta variable 4-1 [Source:HGNC Symbol;Acc:12215]                               |
| 6878 | ENSG00000234508 | 1882.292938 | -0.247764274 | 0.084123497 | 0.008778486 | GPSM3   | G-protein signaling modulator 3 [Source:HGNC Symbol;Acc:13945]                                 |
| 6879 | ENSG00000237052 | 1882.29291  | -0.247763617 | 0.084123544 | 0.008778486 | GPSM3   | G-protein signaling modulator 3 [Source:HGNC Symbol;Acc:13945]                                 |
| 6880 | ENSG00000206314 | 1882.292913 | -0.247762453 | 0.084123758 | 0.008778486 | GPSM3   | G-protein signaling modulator 3 [Source:HGNC Symbol;Acc:13945]                                 |
| 6881 | ENSG00000185974 | 27.61524999 | -1.380489438 | 0.468805184 | 0.00879187  | GRK1    | G protein-coupled receptor kinase 1 [Source:HGNC Symbol;Acc:10013]                             |
| 6882 | ENSG00000077327 | 26.8585805  | 1.412691324  | 0.479750023 | 0.008792212 | SPAG6   | sperm associated antigen 6 [Source:HGNC Symbol;Acc:11215]                                      |

|      |                 |             |              |             |             |               |                                                                                                        |
|------|-----------------|-------------|--------------|-------------|-------------|---------------|--------------------------------------------------------------------------------------------------------|
| 6883 | ENSG00000234243 | 1882.594566 | -0.247447083 | 0.084088259 | 0.008845808 | GPSM3         | G-protein signaling modulator 3 [Source:HGNC Symbol;Acc:13945]                                         |
| 6884 | ENSG00000005469 | 180.3764696 | 0.856935118  | 0.291210117 | 0.008845808 | CROT          | carnitine O-octanoyltransferase [Source:HGNC Symbol;Acc:2366]                                          |
| 6885 | ENSG00000171148 | 2071.977791 | -0.237515896 | 0.080716703 | 0.008846887 | TADA3         | transcriptional adaptor 3 [Source:HGNC Symbol;Acc:19422]                                               |
| 6886 | ENSG00000214402 | 16.21779108 | 1.604492407  | 0.545362293 | 0.008860461 | LCNL1         | lipocalin-like 1 [Source:HGNC Symbol;Acc:34436]                                                        |
| 6887 | ENSG00000160741 | 2635.712027 | 0.254446787  | 0.086503968 | 0.008876945 | CRTC2         | CREB regulated transcription coactivator 2 [Source:HGNC Symbol;Acc:27301]                              |
| 6888 | ENSG00000100473 | 241.6208376 | -0.700812765 | 0.23834024  | 0.008906037 | COCH          | cochlin [Source:HGNC Symbol;Acc:2180]                                                                  |
| 6889 | ENSG00000134287 | 4437.981658 | 0.176946563  | 0.060184561 | 0.008912954 | ARF3          | ADP-ribosylation factor 3 [Source:HGNC Symbol;Acc:654]                                                 |
| 6890 | ENSG00000101457 | 1461.871595 | -0.272325619 | 0.092625951 | 0.008912954 | DNTTIP1       | deoxynucleotidyltransferase, terminal, interacting protein 1 [Source:HGNC Symbol;Acc:16160]            |
| 6891 | ENSG00000123338 | 4317.012787 | -0.176063674 | 0.059890319 | 0.008919975 | NCKAP1L       | NCK-associated protein 1-like [Source:HGNC Symbol;Acc:4862]                                            |
| 6892 | ENSG00000125780 | 131.0215835 | -0.792231258 | 0.269549238 | 0.008938038 | TGM3          | transglutaminase 3 [Source:HGNC Symbol;Acc:11779]                                                      |
| 6893 | ENSG00000160013 | 63.3306729  | 1.109498319  | 0.377512817 | 0.008940433 | PTGIR         | prostaglandin I2 (prostacyclin) receptor (IP) [Source:HGNC Symbol;Acc:9602]                            |
| 6894 | ENSG00000181038 | 448.4691311 | 0.472470802  | 0.160766979 | 0.00894242  | METTL23       | methyltransferase like 23 [Source:HGNC Symbol;Acc:26988]                                               |
| 6895 | ENSG00000237515 | 424.782608  | -0.462659984 | 0.157521835 | 0.008990669 | SHISA9        | shisa family member 9 [Source:HGNC Symbol;Acc:37231]                                                   |
| 6896 | ENSG00000107758 | 1415.526849 | -0.264535532 | 0.090067018 | 0.008990669 | PPP3CB        | protein phosphatase 3, catalytic subunit, beta isozyme [Source:HGNC Symbol;Acc:9315]                   |
| 6897 | ENSG00000131408 | 867.9971609 | 0.427270564  | 0.14551027  | 0.009010735 | NR1H2         | nuclear receptor subfamily 1, group H, member 2 [Source:HGNC Symbol;Acc:7965]                          |
| 6898 | ENSG00000143379 | 1912.600457 | -0.245884612 | 0.083745655 | 0.009017338 | SETDB1        | SET domain, bifurcated 1 [Source:HGNC Symbol;Acc:10761]                                                |
| 6899 | ENSG00000148153 | 661.8879387 | -0.387985826 | 0.132154756 | 0.009023108 | INIP          | INTS3 and NABP interacting protein [Source:HGNC Symbol;Acc:24994]                                      |
| 6900 | ENSG00000151702 | 5025.652319 | -0.185512847 | 0.063195959 | 0.009031317 | FLI1          | Fli-1 proto-oncogene, ETS transcription factor [Source:HGNC Symbol;Acc:3749]                           |
| 6901 | ENSG00000085382 | 336.6706127 | -0.499603199 | 0.17022589  | 0.009046759 | HACE1         | HECT domain and ankyrin repeat containing E3 ubiquitin protein ligase 1 [Source:HGNC Symbol;Acc:21033] |
| 6902 | ENSG00000170540 | 2390.963005 | -0.223492972 | 0.076169086 | 0.009068022 | ARL6IP1       | ADP-ribosylation factor-like 6 interacting protein 1 [Source:HGNC Symbol;Acc:697]                      |
| 6903 | ENSG00000261208 | 24.28254781 | 1.452714016  | 0.495133062 | 0.009072023 | RP11-452D12.1 |                                                                                                        |
| 6904 | ENSG00000146281 | 588.2012053 | 0.384939329  | 0.131203728 | 0.009073096 | PM20D2        | peptidase M20 domain containing 2 [Source:HGNC Symbol;Acc:21408]                                       |
| 6905 | ENSG00000135070 | 603.909724  | 0.414145286  | 0.141207338 | 0.009101567 | ISCA1         | iron-sulfur cluster assembly 1 [Source:HGNC Symbol;Acc:28660]                                          |
| 6906 | ENSG00000121964 | 864.9539301 | -0.380292893 | 0.129668634 | 0.009102662 | GTDC1         | glycosyltransferase-like domain containing 1 [Source:HGNC Symbol;Acc:20887]                            |
| 6907 | ENSG00000229353 | 26.27710835 | -1.495293404 | 0.509892837 | 0.009108426 | TNXB          | tenascin XB [Source:HGNC Symbol;Acc:11976]                                                             |
| 6908 | ENSG00000233306 | 28.63021959 | 1.419227063  | 0.484082168 | 0.009129847 | TRGV2         | T cell receptor gamma variable 2 [Source:HGNC Symbol;Acc:12287]                                        |
| 6909 | ENSG00000182446 | 2534.368609 | -0.293811223 | 0.100292415 | 0.009194692 | NPLOC4        | nuclear protein localization 4 homolog (S. cerevisiae) [Source:HGNC Symbol;Acc:18261]                  |
| 6910 | ENSG00000177464 | 27.30591861 | -1.433663192 | 0.489402929 | 0.009197298 | GPR4          | G protein-coupled receptor 4 [Source:HGNC Symbol;Acc:4497]                                             |

|      |                 |             |              |             |             |              |                                                                                                                                                                                                                                                       |
|------|-----------------|-------------|--------------|-------------|-------------|--------------|-------------------------------------------------------------------------------------------------------------------------------------------------------------------------------------------------------------------------------------------------------|
| 6911 | ENSG00000109929 | 178.5298549 | 0.738845224  | 0.252241911 | 0.009204821 | SC5D         | sterol-C5-desaturase [Source:HGNC Symbol;Acc:10547]                                                                                                                                                                                                   |
| 6912 | ENSG00000103152 | 142.8546515 | 0.824504103  | 0.281501379 | 0.009208269 | MPG          | N-methylpurine-DNA glycosylase [Source:HGNC Symbol;Acc:7211]                                                                                                                                                                                          |
| 6913 | ENSG00000165949 | 35.99206455 | -1.280164377 | 0.437153294 | 0.009222992 | IFI27        | interferon, alpha-inducible protein 27 [Source:HGNC Symbol;Acc:5397]                                                                                                                                                                                  |
| 6914 | ENSG00000148985 | 386.6548936 | -0.469480047 | 0.160358267 | 0.009242918 | PGAP2        | post-GPI attachment to proteins 2 [Source:HGNC Symbol;Acc:17893]                                                                                                                                                                                      |
| 6915 | ENSG00000112078 | 2175.952376 | 0.252981943  | 0.086412335 | 0.009243986 | KCTD20       | potassium channel tetramerization domain containing 20 [Source:HGNC Symbol;Acc:21052]                                                                                                                                                                 |
| 6916 | ENSG00000168310 | 2346.271647 | 0.225924201  | 0.077172773 | 0.009245683 | IRF2         | interferon regulatory factor 2 [Source:HGNC Symbol;Acc:6117]                                                                                                                                                                                          |
| 6917 | ENSG00000009724 | 384.7145598 | 0.490337794  | 0.167535656 | 0.009266517 | MASP2        | mannan-binding lectin serine peptidase 2 [Source:HGNC Symbol;Acc:6902]                                                                                                                                                                                |
| 6918 | ENSG00000146828 | 4067.676425 | 0.237167805  | 0.081061507 | 0.009294738 | SLC12A9      | solute carrier family 12, member 9 [Source:HGNC Symbol;Acc:17435]                                                                                                                                                                                     |
| 6919 | ENSG00000215699 | 1090.649537 | 0.296400623  | 0.101316751 | 0.009302091 | SRSF10       | cDNA FLJ30749 fis, clone FEBRA2000402, highly similar to FUS-interacting serine-arginine-rich protein 1; cDNA FLJ43846 fis, clone TEST14006393, highly similar to FUS-interacting serine-arginine-rich protein 1 [Source:UniProtKB/TrEMBL;Acc:B3KNY6] |
| 6920 | ENSG00000118454 | 266.5823943 | 0.596243923  | 0.203866352 | 0.009324823 | ANKRD13C     | ankyrin repeat domain 13C [Source:HGNC Symbol;Acc:25374]                                                                                                                                                                                              |
| 6921 | ENSG00000101255 | 237.3129885 | -0.612264817 | 0.209349357 | 0.009325643 | TRIB3        | tribbles pseudokinase 3 [Source:HGNC Symbol;Acc:16228]                                                                                                                                                                                                |
| 6922 | ENSG00000271064 | 10.71549732 | -1.641158627 | 0.561219794 | 0.009334406 | RP11-792A8.3 |                                                                                                                                                                                                                                                       |
| 6923 | ENSG00000198374 | 9.971203937 | -1.657467934 | 0.566973772 | 0.009360431 | HIST1H2AL    | histone cluster 1, H2al [Source:HGNC Symbol;Acc:4730]                                                                                                                                                                                                 |
| 6924 | ENSG00000203326 | 252.3241587 | 0.689676207  | 0.235974558 | 0.009379758 | ZNF525       | zinc finger protein 525 [Source:HGNC Symbol;Acc:29423]                                                                                                                                                                                                |
| 6925 | ENSG00000129292 | 3813.38341  | -0.185335175 | 0.063429007 | 0.009400743 | PHF20L1      | PHD finger protein 20-like 1 [Source:HGNC Symbol;Acc:24280]                                                                                                                                                                                           |
| 6926 | ENSG00000163026 | 170.8781305 | 0.702555619  | 0.240516122 | 0.009426508 | C2orf44      | chromosome 2 open reading frame 44 [Source:HGNC Symbol;Acc:26157]                                                                                                                                                                                     |
| 6927 | ENSG00000261378 | 1598.388142 | 0.255927146  | 0.087622725 | 0.009432662 | RAB5C        | RAB5C, member RAS oncogene family [Source:HGNC Symbol;Acc:9785]                                                                                                                                                                                       |
| 6928 | ENSG00000065600 | 153.512082  | 0.879107784  | 0.301087704 | 0.009461977 | TMEM206      | transmembrane protein 206 [Source:HGNC Symbol;Acc:25593]                                                                                                                                                                                              |
| 6929 | ENSG00000110002 | 112.0770323 | 0.891874981  | 0.305487007 | 0.009468342 | VWA5A        | von Willebrand factor A domain containing 5A [Source:HGNC Symbol;Acc:6658]                                                                                                                                                                            |
| 6930 | ENSG00000184047 | 550.0556528 | 0.409495167  | 0.140278523 | 0.009477934 | DIABLO       | diablo, IAP-binding mitochondrial protein [Source:HGNC Symbol;Acc:21528]                                                                                                                                                                              |
| 6931 | ENSG00000260383 | 167.3108482 | -0.761391043 | 0.260831289 | 0.009478512 | MROH1        | maestro heat-like repeat family member 1 [Source:HGNC Symbol;Acc:26958]                                                                                                                                                                               |
| 6932 | ENSG00000178921 | 293.2071065 | -0.535459603 | 0.183496603 | 0.009507713 | PFAS         | phosphoribosylformylglycinamide synthase [Source:HGNC Symbol;Acc:8863]                                                                                                                                                                                |
| 6933 | ENSG00000196866 | 19.78302837 | -1.54812888  | 0.530629976 | 0.009523428 | HIST1H2AD    | histone cluster 1, H2ad [Source:HGNC Symbol;Acc:4729]                                                                                                                                                                                                 |
| 6934 | ENSG00000119231 | 862.3400019 | -0.38811507  | 0.133033341 | 0.009525199 | SENPS        | SUMO1/sentrin specific peptidase 5 [Source:HGNC Symbol;Acc:28407]                                                                                                                                                                                     |
| 6935 | ENSG00000164050 | 112.6738904 | -0.991349855 | 0.339868962 | 0.009541063 | PLXNB1       | plexin B1 [Source:HGNC Symbol;Acc:9103]                                                                                                                                                                                                               |
| 6936 | ENSG00000182986 | 396.4965445 | 0.56165744   | 0.192558269 | 0.009541063 | ZNF320       | zinc finger protein 320 [Source:HGNC Symbol;Acc:13842]                                                                                                                                                                                                |
| 6937 | ENSG00000130559 | 409.0684214 | 0.615207521  | 0.210929259 | 0.009544728 | CAMSAP1      | calmodulin regulated spectrin-associated protein 1 [Source:HGNC Symbol;Acc:19946]                                                                                                                                                                     |
| 6938 | ENSG00000258315 | 1197.29734  | 0.313318524  | 0.10744308  | 0.009559222 | C17orf49     | chromosome 17 open reading frame 49 [Source:HGNC Symbol;Acc:28737]                                                                                                                                                                                    |

|      |                 |             |              |             |             |          |                                                                                                                                             |
|------|-----------------|-------------|--------------|-------------|-------------|----------|---------------------------------------------------------------------------------------------------------------------------------------------|
| 6939 | ENSG00000123136 | 1774.412895 | 0.247303922  | 0.084831518 | 0.009585411 | DDX39A   | DEAD (Asp-Glu-Ala-Asp) box polypeptide 39A [Source:HGNC Symbol;Acc:17821]                                                                   |
| 6940 | ENSG00000243927 | 932.3838958 | 0.337398891  | 0.115745089 | 0.00959077  | MRPS6    | mitochondrial ribosomal protein S6 [Source:HGNC Symbol;Acc:14051]                                                                           |
| 6941 | ENSG00000177034 | 177.3829241 | 0.756374094  | 0.259484636 | 0.009592706 | MTX3     | metaxin 3 [Source:HGNC Symbol;Acc:24812]                                                                                                    |
| 6942 | ENSG00000036549 | 498.6838294 | 0.446929364  | 0.153366328 | 0.009615301 | ZZZ3     | zinc finger, ZZ-type containing 3 [Source:HGNC Symbol;Acc:24523]                                                                            |
| 6943 | ENSG00000104804 | 12.4798101  | -1.65066191  | 0.566478806 | 0.009621028 | TULP2    | tubby like protein 2 [Source:HGNC Symbol;Acc:12424]                                                                                         |
| 6944 | ENSG00000180964 | 282.3204681 | 0.554065613  | 0.190219879 | 0.009654668 | TCEAL8   | transcription elongation factor A (SII)-like 8 [Source:HGNC Symbol;Acc:28683]                                                               |
| 6945 | ENSG00000137809 | 9.841150521 | 1.648868176  | 0.566096537 | 0.009655322 | ITGA11   | integrin, alpha 11 [Source:HGNC Symbol;Acc:6136]                                                                                            |
| 6946 | ENSG00000246922 | 236.0264355 | 0.601522566  | 0.206542634 | 0.009664972 | UBAP1L   | ubiquitin associated protein 1-like [Source:HGNC Symbol;Acc:40028]                                                                          |
| 6947 | ENSG00000100767 | 344.2941302 | 0.49512777   | 0.170023212 | 0.00967046  | PAPLN    | papilin, proteoglycan-like sulfated glycoprotein [Source:HGNC Symbol;Acc:19262]                                                             |
| 6948 | ENSG00000103064 | 2674.979015 | 0.235222752  | 0.080792896 | 0.009690449 | SLC7A6   | solute carrier family 7 (amino acid transporter light chain, y+L system), member 6 [Source:HGNC Symbol;Acc:11064]                           |
| 6949 | ENSG00000183889 | 953.6612697 | 0.332738135  | 0.114308819 | 0.009706388 | NPIPA7   | Protein PKD1P1 [Source:UniProtKB/TrEMBL;Acc:HOYEP2]                                                                                         |
| 6950 | ENSG00000156140 | 6.734559216 | -1.583555758 | 0.544027409 | 0.009707128 | ADAMTS3  | ADAM metalloproteinase with thrombospondin type 1 motif, 3 [Source:HGNC Symbol;Acc:219]                                                     |
| 6951 | ENSG00000131943 | 296.9194622 | 0.540173792  | 0.185594851 | 0.009715102 | C19orf12 | chromosome 19 open reading frame 12 [Source:HGNC Symbol;Acc:25443]                                                                          |
| 6952 | ENSG00000186166 | 475.370944  | 0.423182261  | 0.145434794 | 0.009736318 | CCDC84   | coiled-coil domain containing 84 [Source:HGNC Symbol;Acc:30460]                                                                             |
| 6953 | ENSG00000269603 | 329.5221447 | 0.524983836  | 0.18044721  | 0.00974815  | ZBTB33   | zinc finger and BTB domain containing 33 [Source:HGNC Symbol;Acc:16682]                                                                     |
| 6954 | ENSG00000122432 | 99.08073657 | -0.879515142 | 0.30241711  | 0.009778221 | SPATA1   | spermatogenesis associated 1 [Source:HGNC Symbol;Acc:14682]                                                                                 |
| 6955 | ENSG00000211891 | 10.30335963 | -1.644390232 | 0.565418333 | 0.009778221 | IGHF     | immunoglobulin heavy constant epsilon [Source:HGNC Symbol;Acc:5522]                                                                         |
| 6956 | ENSG00000270340 | 10.30332544 | -1.64437815  | 0.565418291 | 0.009778221 | IGHF     | immunoglobulin heavy constant epsilon [Source:HGNC Symbol;Acc:5522]                                                                         |
| 6957 | ENSG00000198677 | 1183.889288 | 0.297066105  | 0.102147809 | 0.009778449 | TTC37    | tetratricopeptide repeat domain 37 [Source:HGNC Symbol;Acc:23639]                                                                           |
| 6958 | ENSG00000132570 | 295.4329138 | -0.560169091 | 0.192635241 | 0.009785556 | PCBD2    | pterin-4 alpha-carbinolamine dehydratase/dimerization cofactor of hepatocyte nuclear factor 1 alpha (TCF1) 2 [Source:HGNC Symbol;Acc:24474] |
| 6959 | ENSG00000188130 | 98.47472099 | 0.915727897  | 0.314939414 | 0.009793365 | MAPK12   | mitogen-activated protein kinase 12 [Source:HGNC Symbol;Acc:6874]                                                                           |
| 6960 | ENSG00000158769 | 4171.393726 | 0.18656132   | 0.064169524 | 0.009801738 | F11R     | F11 receptor [Source:HGNC Symbol;Acc:14685]                                                                                                 |
| 6961 | ENSG00000144152 | 25.22588695 | 1.467912691  | 0.504910303 | 0.009801756 | FBLN7    | fibulin 7 [Source:HGNC Symbol;Acc:26740]                                                                                                    |
| 6962 | ENSG0000053371  | 260.4599876 | 0.58020198   | 0.199575664 | 0.009803362 | AKR7A2   | aldo-keto reductase family 7, member A2 (aflatoxin aldehyde reductase) [Source:HGNC Symbol;Acc:389]                                         |
| 6963 | ENSG00000136682 | 751.705681  | 0.362427179  | 0.124702336 | 0.009828299 | CBWD2    | COBW domain containing 2 [Source:HGNC Symbol;Acc:17907]                                                                                     |
| 6964 | ENSG00000224183 | 36.35109845 | 1.351660776  | 0.465119738 | 0.009835977 | SDHDP6   | succinate dehydrogenase complex, subunit D, integral membrane protein pseudogene 6 [Source:HGNC Symbol;Acc:10689]                           |
| 6965 | ENSG00000174446 | 299.161006  | 0.525383009  | 0.180816942 | 0.009848461 | SNAPC5   | small nuclear RNA activating complex, polypeptide 5, 19kDa [Source:HGNC Symbol;Acc:15484]                                                   |
| 6966 | ENSG00000130635 | 73.24435724 | 1.088946528  | 0.374803533 | 0.009854213 | COL5A1   | collagen, type V, alpha 1 [Source:HGNC Symbol;Acc:2209]                                                                                     |

|      |                 |             |              |             |             |         |                                                                                   |
|------|-----------------|-------------|--------------|-------------|-------------|---------|-----------------------------------------------------------------------------------|
| 6967 | ENSG00000122515 | 2161.19281  | -0.275650041 | 0.094894163 | 0.009870569 | ZMIZ2   | zinc finger, MIZ-type containing 2 [Source:HGNC Symbol;Acc:22229]                 |
| 6968 | ENSG00000138658 | 417.9399326 | -0.503106908 | 0.173245849 | 0.009894722 | C4orf21 | chromosome 4 open reading frame 21 [Source:HGNC Symbol;Acc:25654]                 |
| 6969 | ENSG00000163946 | 2400.677062 | 0.252040699  | 0.086794462 | 0.009897272 | FAM208A | family with sequence similarity 208, member A [Source:HGNC Symbol;Acc:30314]      |
| 6970 | ENSG00000169857 | 89.33186002 | 0.897155736  | 0.308965478 | 0.009900244 | AVEN    | apoptosis, caspase activation inhibitor [Source:HGNC Symbol;Acc:13509]            |
| 6971 | ENSG00000169252 | 499.8658351 | 0.495502566  | 0.170664044 | 0.009910245 | ADRB2   | adrenoceptor beta 2, surface [Source:HGNC Symbol;Acc:286]                         |
| 6972 | ENSG00000174197 | 1061.669315 | 0.368080037  | 0.126786039 | 0.009915816 | MGA     | MGA, MAX dimerization protein [Source:HGNC Symbol;Acc:14010]                      |
| 6973 | ENSG00000134982 | 1557.176457 | 0.26426345   | 0.091034784 | 0.009923094 | APC     | adenomatous polyposis coli [Source:HGNC Symbol;Acc:583]                           |
| 6974 | ENSG00000138777 | 576.8267302 | -0.387964244 | 0.133702187 | 0.009959111 | PPA2    | pyrophosphatase (inorganic) 2 [Source:HGNC Symbol;Acc:28883]                      |
| 6975 | ENSG00000237911 | 9.561812607 | -1.643297127 | 0.566333247 | 0.009959627 | SRP68P3 | signal recognition particle 68kDa pseudogene 3 [Source:HGNC Symbol;Acc:30428]     |
| 6976 | ENSG00000143575 | 1052.999373 | 0.306594573  | 0.105667455 | 0.009962622 | HAX1    | HCLS1 associated protein X-1 [Source:HGNC Symbol;Acc:16915]                       |
| 6977 | ENSG00000169992 | 40.4672977  | 1.27851975   | 0.44069416  | 0.009972471 | NLGN2   | neuroligin 2 [Source:HGNC Symbol;Acc:14290]                                       |
| 6978 | ENSG00000185875 | 71.89824762 | 1.011444216  | 0.348709691 | 0.009990663 | THNSL1  | threonine synthase-like 1 ( <i>S. cerevisiae</i> ) [Source:HGNC Symbol;Acc:26160] |
| 6979 | ENSG00000087842 | 13.29902438 | -1.613215742 | 0.556187639 | 0.009990679 | PIR     | pirin (iron-binding nuclear protein) [Source:HGNC Symbol;Acc:30048]               |



**Table S3.** Differentially expressed genes in blast transformation specimen versus pre-ruxolitinib specimen previously associated with BCR-like signaling.<sup>10</sup> Data were derived from Table S2 with fold-change manually calculated.

| gene            | baseMean    | estimate    | fold-change | stderror    | p.adjusted  | symbol | description                                                                     |
|-----------------|-------------|-------------|-------------|-------------|-------------|--------|---------------------------------------------------------------------------------|
| ENSG00000007312 | 1027.354333 | 2.789976949 | 6.916187    | 0.123691933 | 9.25E-111   | CD79B  | CD79b molecule, immunoglobulin-associated beta [Source:HGNC Symbol;Acc:1699]    |
| ENSG00000105369 | 696.8990772 | 3.208238818 | 9.242216    | 0.148923125 | 4.17E-101   | CD79A  | CD79a molecule, immunoglobulin-associated alpha [Source:HGNC Symbol;Acc:1698]   |
| ENSG00000166349 | 454.4772237 | 3.462584801 | 11.024068   | 0.189404804 | 5.04E-73    | RAG1   | recombination activating gene 1 [Source:HGNC Symbol;Acc:9831]                   |
| ENSG00000169575 | 240.5855028 | 3.359491044 | 10.263786   | 0.239654533 | 2.85E-43    | VPREB1 | pre-B lymphocyte 1 [Source:HGNC Symbol;Acc:12709]                               |
| ENSG00000115085 | 2167.523195 | 2.873710651 | 7.329479    | 0.218126541 | 2.56E-38    | ZAP70  | zeta-chain (TCR) associated protein kinase 70kDa [Source:HGNC Symbol;Acc:12858] |
| ENSG00000128322 | 256.3355421 | 2.11959618  | 4.345723    | 0.216343878 | 1.41E-21    | IGLL1  | immunoglobulin lambda-like polypeptide 1 [Source:HGNC Symbol;Acc:5870]          |
| ENSG00000175097 | 78.80209995 | 2.636772356 | 6.219387    | 0.34965443  | 3.77E-13    | RAG2   | recombination activating gene 2 [Source:HGNC Symbol;Acc:9832]                   |
| ENSG00000095585 | 256.3475556 | 2.050878922 | 4.143583    | 0.538658814 | 0.000485736 | BLNK   | B-cell linker [Source:HGNC Symbol;Acc:14211]                                    |

## References

1. Merker JD, Roskin KM, Ng D, et al. Comprehensive whole-genome sequencing of an early-stage primary myelofibrosis patient defines low mutational burden and non-recurrent candidate genes. *Haematologica*. 2013;98(11):1689-1696.
2. Cibulskis K, Lawrence MS, Carter SL, et al. Sensitive detection of somatic point mutations in impure and heterogeneous cancer samples. *Nat Biotechnol*. 2013;31(3):213-219.
3. Patro R, Duggal G, Love MI, Irizarry RA, Kingsford C. Salmon provides fast and bias-aware quantification of transcript expression. *Nat Methods*. 2017;14(4):417-419.
4. Love MI, Huber W, Anders S. Moderated estimation of fold change and dispersion for RNA-seq data with DESeq2. *Genome Biol*. 2014;15(12):550.
5. Johnson SH, Smadbeck JB, Smoley SA, et al. SVAtools for junction detection of genome-wide chromosomal rearrangements by mate-pair sequencing (MPseq). *Cancer Genet*. 2018;221:1-18.
6. Smadbeck J, Peterson JF, Pearce KE, et al. Mate pair sequencing outperforms fluorescence in situ hybridization in the genomic characterization of multiple myeloma. *Blood Cancer J*. 2019;9(12):103.
7. Aypar U, Smoley SA, Pitel BA, et al. Mate pair sequencing improves detection of genomic abnormalities in acute myeloid leukemia. *Eur J Haematol*. 2019;102(1):87-96.
8. Drucker TM, Johnson SH, Murphy SJ, Cradic KW, Therneau TM, Vasmataz G. BIMA V3: an aligner customized for mate pair library sequencing. *Bioinformatics*. 2014;30(11):1627-1629.
9. Gaitatzes A, Johnson SH, Smadbeck JB, Vasmataz G. Genome U-Plot: a whole genome visualization. *Bioinformatics*. 2018;34(10):1629-1634.
10. Hurtz C, Wertheim GB, Loftus JP, et al. Oncogene-independent BCR-like signaling adaptation confers drug resistance in Ph-like ALL. *J Clin Invest*. 2020;130(7):3637-3653.
